# Supplementary material for: Sex Differences in the Effects of Prenatal Bisphenol A Exposure on Genes Associated with Autism Spectrum Disorder in the Hippocampus
Source: PubMed Central journal article supplement (PMC6395584; doi:10.1038/s41598-019-39386-w), 2019-02-28
Supplement: 41598_2019_39386_MOESM1_ESM.pdf [file 41598_2019_39386_MOESM1_ESM.pdf]

## **Sex Differences in the Effects of Prenatal Bisphenol A Exposure on Genes Associated with Autism Spectrum Disorder in the Hippocampus**

Surangrat Thongkorn<sup>1</sup>, Songphon Kanlayaprasit<sup>1</sup>, Depicha Jindatip<sup>2</sup>, Tewin Tencomnao<sup>3</sup>, Valerie W. Hu<sup>4</sup>, Tewarit Sarachana<sup>3,\*</sup>

<sup>1</sup>The Ph.D. Program in Clinical Biochemistry and Molecular Medicine, Department of Clinical Chemistry, Faculty of Allied Health Sciences, Chulalongkorn University, Bangkok, Thailand.

<sup>2</sup>Department of Anatomy, Faculty of Medicine, Chulalongkorn University, Bangkok, Thailand.

<sup>3</sup>Age-related Inflammation and Degeneration Research Unit, Department of Clinical Chemistry, Faculty of Allied Health Sciences, Chulalongkorn University, Bangkok, Thailand.

<sup>4</sup>Department of Biochemistry and Molecular Medicine, The George Washington University School of Medicine and Health Sciences, The George Washington University, Washington, DC, USA.

\*Corresponding author:

Tewarit Sarachana, Ph.D.

Age-related Inflammation and Degeneration Research Unit, Department of Clinical Chemistry,

Faculty of Allied Health Sciences, Chulalongkorn University

154 Soi Chula 12, Rama 1 Road, Wangmai, Pathumwan, Bangkok, 10330, Thailand

Tel. 662-218-1081 ext. 313

Fax. 662-218-1082

E-mail: [tewarit.sa@chula.ac.th](mailto:tewarit.sa@chula.ac.th)

**Supplementary Table S1. The lists of DEGs from RNA-seq analysis of the hippocampi of rats prenatally exposed to BPA**

| <b>DEGs in Both Sexes</b> |               |                                                                        |                       |
|---------------------------|---------------|------------------------------------------------------------------------|-----------------------|
| <b>ID</b>                 | <b>Symbol</b> | <b>Entrez Gene Name</b>                                                | <b>Expr Log Ratio</b> |
| 148675846                 | FAM114A2      | family with sequence similarity 114 member A2                          | -9.453                |
| 672027854                 | APBB2         | amyloid beta precursor protein binding family B member 2               | -8.723                |
| 564316241                 | CEP170        | centrosomal protein 170                                                | -8.600                |
| 149055308                 | N/A           | N/A                                                                    | -8.147                |
| 293347435                 | PTPRD         | protein tyrosine phosphatase, receptor type D                          | -7.731                |
| 149029159                 | N/A           | N/A                                                                    | -7.551                |
| 154090947                 | NPAS3         | neuronal PAS domain protein 3                                          | -7.476                |
| 672039093                 | N/A           | N/A                                                                    | -7.388                |
| 564375502                 | Mxra7         | matrix-remodelling associated 7                                        | -7.209                |
| 672088045                 | N/A           | N/A                                                                    | -7.124                |
| 293344558                 | PCNX3         | pecanex homolog 3                                                      | -7.103                |
| 149057336                 | ZSCAN2        | zinc finger and SCAN domain containing 2                               | -7.087                |
| 148694630                 | N/A           | N/A                                                                    | -6.948                |
| 149042655                 | N/A           | N/A                                                                    | -6.937                |
| 392339806                 | CFAP69        | cilia and flagella associated protein 69                               | -6.820                |
| 564302768                 | KIAA1755      | KIAA1755                                                               | -6.820                |
| 672084304                 | N/A           | N/A                                                                    | -6.801                |
| 564307173                 | HEATR5A       | HEAT repeat containing 5A                                              | -6.735                |
| 564310188                 | IGDCC4        | immunoglobulin superfamily DCC subclass member 4                       | -6.728                |
| 564314389                 | DZIP3         | DAZ interacting zinc finger protein 3                                  | -6.700                |
| 149026222                 | N/A           | N/A                                                                    | -6.484                |
| 672031167                 | C19orf57      | chromosome 19 open reading frame 57                                    | -6.476                |
| 149020633                 | TAF1D         | TATA-box binding protein associated factor, RNA polymerase I subunit D | -6.476                |
| 66911867                  | PHF20L1       | PHD finger protein 20 like 1                                           | -6.451                |
| 671034187                 | N/A           | N/A                                                                    | -6.150                |
| 672024381                 | N/A           | N/A                                                                    | -6.150                |
| 293341811                 | PRR14L        | proline rich 14 like                                                   | -6.129                |
| 564320728                 | Fbxo38        | F-box protein 38                                                       | -6.109                |
| 672017191                 | N/A           | N/A                                                                    | -6.077                |
| 672031484                 | PCNX2         | pecanex homolog 2                                                      | -6.044                |
| 672062394                 | N/A           | N/A                                                                    | -5.907                |
| 149052470                 | ZNF454        | zinc finger protein 454                                                | -5.700                |

|           |                             |                                                                                 |        |
|-----------|-----------------------------|---------------------------------------------------------------------------------|--------|
| 157818475 | SMIM22                      | small integral membrane protein 22                                              | -5.615 |
| 567315993 | LOC102550396                | LRRGT00188                                                                      | -5.600 |
| 148684403 | N/A                         | N/A                                                                             | -5.600 |
| 355559972 | N/A                         | N/A                                                                             | -5.476 |
| 672063876 | MGC116197 (includes others) | similar to RIKEN cDNA 1700001E04                                                | -5.443 |
| 564312230 | LOC100912948                | multidrug resistance-associated protein 1-like                                  | -5.285 |
| 568941572 | IQSEC1                      | IQ motif and Sec7 domain 1                                                      | -5.248 |
| 672029704 | ZCCHC6                      | zinc finger CCHC-type containing 6                                              | -5.211 |
| 564313676 | FBF1                        | Fas binding factor 1                                                            | -5.170 |
| 754169051 | EPPIN                       | epididymal peptidase inhibitor                                                  | -5.066 |
| 28972369  | TOMM70                      | translocase of outer mitochondrial membrane 70                                  | -5.066 |
| 350537755 | LYZL4                       | lysozyme like 4                                                                 | -5.044 |
| 197384778 | RGD1311447                  | LOC363276                                                                       | -5.044 |
| 672035060 | CIC                         | capicua transcriptional repressor                                               | -4.863 |
| 157817392 | PIRT                        | phosphoinositide interacting regulator of transient receptor potential channels | -4.833 |
| 149053275 | N/A                         | N/A                                                                             | -4.807 |
| 320498033 | CD300LD                     | CD300 molecule like family member d                                             | -4.672 |
| 564323305 | LOC681300                   | similar to CXXC finger 5                                                        | -4.672 |
| 209447125 | Ctf2                        | cardiotrophin 2                                                                 | -4.392 |
| 201860265 | NRN1L                       | neuritin 1 like                                                                 | -4.358 |
| 300798104 | IFNLR1                      | interferon lambda receptor 1                                                    | -4.248 |
| 966979994 | N/A                         | N/A                                                                             | -4.248 |
| 51591901  | MPIG6B                      | megakaryocyte and platelet inhibitory receptor G6b                              | -4.170 |
| 564298047 | GDPD5                       | glycerophosphodiester phosphodiesterase domain containing 5                     | -4.163 |
| 672075812 | N/A                         | N/A                                                                             | -4.129 |
| 913486723 | N/A                         | N/A                                                                             | -4.112 |
| 53850626  | TINAG                       | tubulointerstitial nephritis antigen                                            | -4.087 |
| 71043922  | TNFRSF9                     | TNF receptor superfamily member 9                                               | -4.087 |
| 114145538 | ARSJ                        | arylsulfatase family member J                                                   | -4.044 |
| 300798035 | NRG4                        | neuregulin 4                                                                    | -4.044 |
| 61556838  | Raet1d/Raet1e               | retinoic acid early transcript 1E                                               | -4.044 |
| 564352824 | Ago4                        | argonate 4, RISC catalytic component                                            | -3.940 |
| 114145748 | LOC680227                   | LRRGT00193                                                                      | -3.907 |
| 157819037 | MBNL3                       | muscleblind like splicing regulator 3                                           | -3.907 |
| 6978515   | APOA1                       | apolipoprotein A1                                                               | -3.807 |

|           |               |                                                    |        |
|-----------|---------------|----------------------------------------------------|--------|
| 117647210 | CTRC          | chymotrypsin C                                     | -3.807 |
| 194474016 | SLC30A8       | solute carrier family 30 member 8                  | -3.807 |
| 564342627 | TP53BP1       | tumor protein p53 binding protein 1                | -3.779 |
| 157820153 | 6030498E09Rik | RIKEN cDNA 6030498E09 gene                         | -3.755 |
| 564315358 | N/A           | N/A                                                | -3.725 |
| 8392926   | ASGR2         | asialoglycoprotein receptor 2                      | -3.700 |
| 48040447  | SUCNR1        | succinate receptor 1                               | -3.700 |
| 532078357 | N/A           | N/A                                                | -3.700 |
| 72255533  | ANXA8/ANXA8L1 | annexin A8 like 1                                  | -3.644 |
| 61556786  | CCL24         | C-C motif chemokine ligand 24                      | -3.585 |
| 194473646 | UPK3A         | uroplakin 3A                                       | -3.585 |
| 149036438 | N/A           | N/A                                                | -3.546 |
| 625217108 | N/A           | N/A                                                | -3.498 |
| 164518908 | RAB25         | RAB25, member RAS oncogene family                  | -3.459 |
| 27465609  | GNAT3         | G protein subunit alpha transducin 3               | -3.392 |
| 157823827 | S1PR4         | sphingosine-1-phosphate receptor 4                 | -3.392 |
| 564342632 | TP53BP1       | tumor protein p53 binding protein 1                | -3.392 |
| 285026465 | HS3ST3A1      | heparan sulfate-glucosamine 3-sulfotransferase 3A1 | -3.322 |
| 148710035 | PITX3         | paired like homeodomain 3                          | -3.322 |
| 148675704 | TBX15         | T-box 15                                           | -3.268 |
| 564324736 | L3MBTL3       | L3MBTL3, histone methyl-lysine binding protein     | -3.262 |
| 9506451   | CA5A          | carbonic anhydrase 5A                              | -3.248 |
| 564375434 | CEP295NL      | CEP295 N-terminal like                             | -3.248 |
| 156231014 | IRX6          | iroquois homeobox 6                                | -3.248 |
| 56788780  | KRT19         | keratin 19                                         | -3.248 |
| 564305562 | PTPRD         | protein tyrosine phosphatase, receptor type D      | -3.248 |
| 56090299  | ODF4          | outer dense fiber of sperm tails 4                 | -3.170 |
| 157822159 | CCDC42        | coiled-coil domain containing 42                   | -3.170 |
| 123173794 | GSG1          | germ cell associated 1                             | -3.170 |
| 62078965  | SLC47A1       | solute carrier family 47 member 1                  | -3.135 |
| 157817652 | BNC2          | basonuclin 2                                       | -3.129 |
| 148707849 | C1QL2         | complement C1q like 2                              | -3.038 |
| 12408310  | N5            | DNA binding protein N5                             | -3.000 |
| 795466258 | N/A           | N/A                                                | -3.000 |
| 392339806 | CFAP69        | cilia and flagella associated protein 69           | -2.947 |
| 149054807 | N/A           | N/A                                                | -2.925 |
| 148704897 | MEOX2         | mesenchyme homeobox 2                              | -2.907 |

|           |                           |                                                                                 |        |
|-----------|---------------------------|---------------------------------------------------------------------------------|--------|
| 57527617  | OAS2                      | 2'-5'-oligoadenylate synthetase 2                                               | -2.907 |
| 20302091  | PLB1                      | phospholipase B1                                                                | -2.907 |
| 157821903 | Slc7a15                   | solute carrier family 7 (cationic amino acid transporter, y+ system), member 15 | -2.907 |
| 564355126 | ADGRF3                    | adhesion G protein-coupled receptor F3                                          | -2.907 |
| 77917534  | CBLC                      | Cbl proto-oncogene C                                                            | -2.807 |
| 347800717 | ILDR1                     | immunoglobulin like domain containing receptor 1                                | -2.807 |
| 20302109  | SLC22A9                   | solute carrier family 22 member 9                                               | -2.807 |
| 672022282 | KIF21A                    | kinesin family member 21A                                                       | -2.790 |
| 564310551 | N/A                       | N/A                                                                             | -2.785 |
| 157822121 | LRMDA                     | leucine rich melanocyte differentiation associated                              | -2.747 |
| 291327518 | AVP                       | arginine vasopressin                                                            | -2.734 |
| 157822377 | ERICH4                    | glutamate rich 4                                                                | -2.716 |
| 156071424 | Vom2r18 (includes others) | vomer nasal 2 receptor, 18                                                      | -2.700 |
| 51948496  | SLC22A18                  | solute carrier family 22 member 18                                              | -2.687 |
| 672032217 | REPS2                     | RALBP1 associated Eps domain containing 2                                       | -2.683 |
| 564313782 | Tha1                      | threonine aldolase 1                                                            | -2.683 |
| 68063179  | N/A                       | N/A                                                                             | -2.651 |
| 295391779 | LOC100363112              | Aa2-296-like                                                                    | -2.644 |
| 8567332   | CALCB                     | calcitonin related polypeptide beta                                             | -2.636 |
| 293351303 | METTL22                   | methyltransferase like 22                                                       | -2.628 |
| 306482632 | BPIFB4                    | BPI fold containing family B member 4                                           | -2.585 |
| 298566276 | Ces1a                     | carboxylesterase 1A                                                             | -2.585 |
| 57222300  | Klra2                     | killer cell lectin-like receptor, subfamily A, member 2                         | -2.585 |
| 157786772 | KREMEN2                   | kringle containing transmembrane protein 2                                      | -2.585 |
| 157822463 | Nkx6-3                    | NK6 homeobox 3                                                                  | -2.585 |
| 57222328  | PFN4                      | profilin family member 4                                                        | -2.585 |
| 148703035 | CLDN11                    | claudin 11                                                                      | -2.549 |
| 56090537  | Ccl7                      | chemokine (C-C motif) ligand 7                                                  | -2.524 |
| 157822853 | GUCA1A                    | guanylate cyclase activator 1A                                                  | -2.509 |
| 884945546 | N/A                       | N/A                                                                             | -2.507 |
| 6978679   | COMP                      | cartilage oligomeric matrix protein                                             | -2.503 |
| 13928714  | Ccl2                      | chemokine (C-C motif) ligand 2                                                  | -2.497 |
| 157822321 | KCNV2                     | potassium voltage-gated channel modifier subfamily V member 2                   | -2.459 |

|           |                           |                                                   |        |
|-----------|---------------------------|---------------------------------------------------|--------|
| 162417984 | Vom2r12 (includes others) | vomeronasal 2 receptor, 80                        | -2.459 |
| 672082610 | N/A                       | N/A                                               | -2.457 |
| 157818895 | RNF225                    | ring finger protein 225                           | -2.451 |
| 564391680 | MAP3K8                    | mitogen-activated protein kinase kinase kinase 8  | -2.426 |
| 149053857 | LOC100363423              | rCG35357-like                                     | -2.421 |
| 157821307 | BNC1                      | basonuclin 1                                      | -2.415 |
| 11120724  | Sult1d1                   | sulfotransferase family 1D, member 1              | -2.415 |
| 68163381  | CALHM5                    | calcium homeostasis modulator family member 5     | -2.392 |
| 672023922 | VWA3B                     | von Willebrand factor A domain containing 3B      | -2.390 |
| 564297387 | Zfp658                    | zinc finger protein 658                           | -2.369 |
| 187469451 | CLEC7A                    | C-type lectin domain containing 7A                | -2.322 |
| 62945342  | LAX1                      | lymphocyte transmembrane adaptor 1                | -2.322 |
| 187282171 | SLC22A13                  | solute carrier family 22 member 13                | -2.322 |
| 392334411 | ANKRD11                   | ankyrin repeat domain 11                          | -2.301 |
| 112983998 | C10orf62                  | chromosome 10 open reading frame 62               | -2.273 |
| 568914626 | GARNL3                    | GTPase activating Rap/RanGAP domain like 3        | -2.261 |
| 148679862 | SLC35F3                   | solute carrier family 35 member F3                | -2.261 |
| 672053062 | FKBP15                    | FK506 binding protein 15                          | -2.254 |
| 387157880 | CLRN1                     | clarin 1                                          | -2.248 |
| 157820151 | ERAS                      | ES cell expressed Ras                             | -2.248 |
| 62079023  | ADTRP                     | androgen dependent TFPI regulating protein        | -2.246 |
| 672028646 | N/A                       | N/A                                               | -2.233 |
| 564320724 | Fbxo38                    | F-box protein 38                                  | -2.220 |
| 13242279  | GJA3                      | gap junction protein alpha 3                      | -2.209 |
| 8393418   | GAPDH                     | glyceraldehyde-3-phosphate dehydrogenase          | -2.197 |
| 198278465 | DYDC2                     | DPY30 domain containing 2                         | -2.190 |
| 157822087 | ACTRT3                    | actin related protein T3                          | -2.170 |
| 39930539  | MYOCD                     | myocardin                                         | -2.170 |
| 40786453  | ABCC12                    | ATP binding cassette subfamily C member 12        | -2.170 |
| 300798413 | FSD2                      | fibronectin type III and SPRY domain containing 2 | -2.170 |
| 404247470 | OLR1                      | oxidized low density lipoprotein receptor 1       | -2.170 |
| 66730349  | SPIB                      | Spi-B transcription factor                        | -2.170 |
| 254675145 | STPG4                     | sperm-tail PG-rich repeat containing 4            | -2.170 |
| 60223047  | DNTT                      | DNA nucleotidylexotransferase                     | -2.147 |
| 392334596 | RSPH3                     | radial spoke head 3 homolog                       | -2.138 |
| 88759335  | IRX2                      | iroquois homeobox 2                               | -2.138 |

|           |           |                                                                               |        |
|-----------|-----------|-------------------------------------------------------------------------------|--------|
| 149046043 | N/A       | N/A                                                                           | -2.130 |
| 25742828  | SCN7A     | sodium voltage-gated channel alpha subunit 7                                  | -2.129 |
| 148702471 | N/A       | N/A                                                                           | -2.127 |
| 148669850 | GFRA1     | GDNF family receptor alpha 1                                                  | -2.118 |
| 58331126  | GJB6      | gap junction protein beta 6                                                   | -2.104 |
| 62078837  | ABHD16B   | abhydrolase domain containing 16B                                             | -2.100 |
| 672088045 | N/A       | N/A                                                                           | -2.097 |
| 300797305 | TMEM45A   | transmembrane protein 45A                                                     | -2.093 |
| 672023280 | N/A       | N/A                                                                           | -2.092 |
| 398650658 | TG        | thyroglobulin                                                                 | -2.087 |
| 148672128 | SMAGP     | small cell adhesion glycoprotein                                              | -2.077 |
| 187937026 | NCF4      | neutrophil cytosolic factor 4                                                 | -2.062 |
| 19923094  | OSGIN1    | oxidative stress induced growth inhibitor 1                                   | -2.059 |
| 564388803 | SLC18A1   | solute carrier family 18 member A1                                            | -2.059 |
| 675294847 | ATP12A    | ATPase H <sup>+</sup> /K <sup>+</sup> transporting non-gastric alpha2 subunit | -2.051 |
| 672089449 | N/A       | N/A                                                                           | -2.050 |
| 149041058 | RCOR3     | REST corepressor 3                                                            | -2.026 |
| 55741882  | ZPBP2     | zona pellucida binding protein 2                                              | -2.022 |
| 19424304  | CHRNB3    | cholinergic receptor nicotinic beta 3 subunit                                 | -2.000 |
| 117647206 | DDX4      | DEAD-box helicase 4                                                           | -2.000 |
| 156119589 | FOXC2     | forkhead box C2                                                               | -2.000 |
| 157822587 | PDE6B     | phosphodiesterase 6B                                                          | -2.000 |
| 296483047 | SIX1      | SIX homeobox 1                                                                | -2.000 |
| 157818091 | TMEM182   | transmembrane protein 182                                                     | -2.000 |
| 987396306 | N/A       | N/A                                                                           | -2.000 |
| 672023560 | Pot1b     | protection of telomeres 1B                                                    | -2.000 |
| 47577151  | Olfir1441 | olfactory receptor 1441                                                       | -1.972 |
| 672014371 | N/A       | N/A                                                                           | -1.963 |
| 56676350  | PRSS35    | protease, serine 35                                                           | -1.962 |
| 18543365  | FGF21     | fibroblast growth factor 21                                                   | -1.948 |
| 18543367  | FGF19     | fibroblast growth factor 19                                                   | -1.945 |
| 157820583 | ANKRD34C  | ankyrin repeat domain 34C                                                     | -1.939 |
| 84781670  | MCOLN2    | mucolipin 2                                                                   | -1.939 |
| 149066014 | PVALB     | parvalbumin                                                                   | -1.939 |
| 564321260 | N/A       | N/A                                                                           | -1.938 |
| 564378170 | PAN3      | PAN3 poly(A) specific ribonuclease subunit                                    | -1.932 |
| 157820217 | Gsta4     | glutathione S-transferase, alpha 4                                            | -1.930 |
| 157818655 | MPZL2     | myelin protein zero like 2                                                    | -1.922 |
| 21326469  | SLC15A3   | solute carrier family 15 member 3                                             | -1.921 |

|           |               |                                                       |        |
|-----------|---------------|-------------------------------------------------------|--------|
| 564380050 | 2410141K09Rik | RIKEN cDNA 2410141K09 gene                            | -1.920 |
| 13540671  | CNMD          | chondromodulin                                        | -1.918 |
| 58000421  | Ggnbp1        | gametogenetin binding protein 1                       | -1.918 |
| 117647214 | EDN3          | endothelin 3                                          | -1.913 |
| 157823875 | EPS8L1        | EPS8 like 1                                           | -1.907 |
| 114052553 | RGS18         | regulator of G protein signaling 18                   | -1.902 |
| 81295367  | Abcg3         | ATP binding cassette subfamily G member 3             | -1.898 |
| 19705467  | Cyp2t4        | cytochrome P450, family 2, subfamily t, polypeptide 4 | -1.898 |
| 157820331 | CAPNS2        | calpain small subunit 2                               | -1.893 |
| 672068485 | N/A           | N/A                                                   | -1.890 |
| 672035210 | PRR19         | proline rich 19                                       | -1.888 |
| 6981154   | Lgals5        | lectin, galactose binding, soluble 5                  | -1.884 |
| 157787076 | SLAMF8        | SLAM family member 8                                  | -1.883 |
| 454526968 | PDE4C         | phosphodiesterase 4C                                  | -1.874 |
| 71043614  | SDCBP2        | syndecan binding protein 2                            | -1.874 |
| 149040268 | N/A           | N/A                                                   | -1.874 |
| 71043672  | FAM166A       | family with sequence similarity 166 member A          | -1.865 |
| 11067389  | BMP15         | bone morphogenetic protein 15                         | -1.858 |
| 149060001 | N/A           | N/A                                                   | -1.858 |
| 672029702 | ZCCHC6        | zinc finger CCHC-type containing 6                    | -1.854 |
| 564309742 | IGSF9B        | immunoglobulin superfamily member 9B                  | -1.850 |
| 13592031  | PTGER2        | prostaglandin E receptor 2                            | -1.845 |
| 297374767 | TPSAB1/TPSB2  | tryptase alpha/beta 1                                 | -1.834 |
| 16758014  | HPX           | hemopexin                                             | -1.830 |
| 18543363  | FGF22         | fibroblast growth factor 22                           | -1.830 |
| 149054577 | CD79B         | CD79b molecule                                        | -1.826 |
| 569009290 | TENM1         | teneurin transmembrane protein 1                      | -1.824 |
| 970699122 | N/A           | N/A                                                   | -1.824 |
| 149064260 | PRDM6         | PR/SET domain 6                                       | -1.816 |
| 226698394 | UNC80         | unc-80 homolog, NALCN channel complex subunit         | -1.781 |
| 300797073 | CCDC27        | coiled-coil domain containing 27                      | -1.778 |
| 157819477 | GLOD5         | glyoxalase domain containing 5                        | -1.768 |
| 672079259 | N/A           | N/A                                                   | -1.758 |
| 57222306  | Oas1f         | 2'-5' oligoadenylate synthetase 1F                    | -1.755 |
| 19424240  | PCSK4         | proprotein convertase subtilisin/kexin type 4         | -1.740 |
| 480306394 | Mcpt4         | mast cell protease 4                                  | -1.739 |
| 149029798 | Tmc4          | transmembrane channel-like 4                          | -1.737 |
| 300795532 | PLSCR5        | phospholipid scramblase family member 5               | -1.727 |



|           |              |                                                              |        |
|-----------|--------------|--------------------------------------------------------------|--------|
| 6981344   | PDC          | phosducin                                                    | -1.722 |
| 71043698  | SYTL1        | synaptotagmin like 1                                         | -1.716 |
| 157820179 | TSNAXIP1     | translin associated factor X interacting protein 1           | -1.713 |
| 54019438  | PCDHAC1      | protocadherin alpha subfamily C, 1                           | -1.704 |
| 31745164  | HAX1         | HCLS1 associated protein X-1                                 | -1.703 |
| 300796107 | PROX2        | prospero homeobox 2                                          | -1.700 |
| 672020363 | N/A          | N/A                                                          | -1.694 |
| 157816965 | DKK2         | dickkopf WNT signaling pathway inhibitor 2                   | -1.694 |
| 564296517 | N/A          | N/A                                                          | -1.688 |
| 157819871 | EPB42        | erythrocyte membrane protein band 4.2                        | -1.678 |
| 157822811 | Fmo9         | flavin containing monooxygenase 9                            | -1.678 |
| 817473312 | GATA6        | GATA binding protein 6                                       | -1.678 |
| 9910234   | IFIT1B       | interferon induced protein with tetratricopeptide repeats 1B | -1.678 |
| 392331668 | HAGHL        | hydroxyacylglutathione hydrolase like                        | -1.665 |
| 564306888 | N/A          | N/A                                                          | -1.661 |
| 300795403 | ODF3B        | outer dense fiber of sperm tails 3B                          | -1.659 |
| 153792385 | Vom2r34      | vomer nasal 2 receptor, 34                                   | -1.648 |
| 672019578 | MYSM1        | Myb like, SWIRM and MPN domains 1                            | -1.645 |
| 564301284 | Ttf1         | transcription termination factor, RNA polymerase I           | -1.633 |
| 6981098   | IL2RB        | interleukin 2 receptor subunit beta                          | -1.632 |
| 505771867 | N/A          | N/A                                                          | -1.624 |
| 148671981 | NFE2         | nuclear factor, erythroid 2                                  | -1.619 |
| 31542125  | ALOX15       | arachidonate 15-lipoxygenase                                 | -1.611 |
| 58331159  | GSTA3        | glutathione S-transferase alpha 3                            | -1.603 |
| 76443687  | SLC4A1       | solute carrier family 4 member 1 (Diego blood group)         | -1.599 |
| 157821527 | RHOD         | ras homolog family member D                                  | -1.597 |
| 158711755 | C17orf97     | chromosome 17 open reading frame 97                          | -1.592 |
| 568964944 | EPB41L2      | erythrocyte membrane protein band 4.1 like 2                 | -1.590 |
| 295391913 | LOC100366054 | Da1-10-like                                                  | -1.590 |
| 117647198 | CFD          | complement factor D                                          | -1.585 |
| 71896590  | AOC3         | amine oxidase, copper containing 3                           | -1.585 |
| 815890866 | HNF1B        | HNF1 homeobox B                                              | -1.585 |
| 209870037 | INSRR        | insulin receptor related receptor                            | -1.585 |
| 62079089  | MALL         | mal, T cell differentiation protein like                     | -1.585 |
| 281604096 | MYH8         | myosin heavy chain 8                                         | -1.585 |
| 157819393 | NNMT         | nicotinamide N-methyltransferase                             | -1.585 |

|           |                            |                                                          |        |
|-----------|----------------------------|----------------------------------------------------------|--------|
| 564328425 | TPH1                       | tryptophan hydroxylase 1                                 | -1.585 |
| 19745192  | ATP2C2                     | ATPase secretory pathway Ca <sup>2+</sup> transporting 2 | -1.585 |
| 194294538 | CACNA1S                    | calcium voltage-gated channel subunit alpha 1 S          | -1.585 |
| 157818603 | CLCA2                      | chloride channel accessory 2                             | -1.585 |
| 685156911 | NLRP4                      | NLR family pyrin domain containing 4                     | -1.585 |
| 194473618 | SCX                        | scleraxis bHLH transcription factor                      | -1.585 |
| 149041966 | N/A                        | N/A                                                      | -1.585 |
| 564378315 | Zfp853                     | zinc finger protein 853                                  | -1.574 |
| 392332008 | SLC38A10                   | solute carrier family 38 member 10                       | -1.568 |
| 564312886 | DNAH2                      | dynein axonemal heavy chain 2                            | -1.566 |
| 194239635 | Tpsab1                     | tryptase alpha/beta 1                                    | -1.563 |
| 564379810 | TMEM119                    | transmembrane protein 119                                | -1.562 |
| 149034165 | GALNT15                    | polypeptide N-acetylgalactosaminyltransferase 15         | -1.561 |
| 672082610 | N/A                        | N/A                                                      | -1.557 |
| 13929066  | CPZ                        | carboxypeptidase Z                                       | -1.549 |
| 6978837   | FGF10                      | fibroblast growth factor 10                              | -1.548 |
| 16758884  | Cd52                       | CD52 antigen                                             | -1.546 |
| 28972714  | KLHL13                     | kelch like family member 13                              | -1.539 |
| 157820611 | INSC                       | INSC, spindle orientation adaptor protein                | -1.536 |
| 6981326   | S100A4                     | S100 calcium binding protein A4                          | -1.532 |
| 21426773  | ASPG                       | asparaginase                                             | -1.524 |
| 300798371 | MCTP2                      | multiple C2 and transmembrane domain containing 2        | -1.524 |
| 149050087 | N/A                        | N/A                                                      | -1.524 |
| 157819105 | C2orf73                    | chromosome 2 open reading frame 73                       | -1.515 |
| 149025029 | SUSD6                      | sushi domain containing 6                                | -1.512 |
| 158186711 | F13A1                      | coagulation factor XIII A chain                          | -1.510 |
| 157821867 | BMP8A                      | bone morphogenetic protein 8a                            | -1.509 |
| 281371353 | IL17B                      | interleukin 17B                                          | -1.507 |
| 840084406 | Lypd2                      | Ly6/Plaur domain containing 2                            | -1.506 |
| 155369702 | ECHDC3                     | enoyl-CoA hydratase domain containing 3                  | -1.497 |
| 74202463  | EYA2                       | EYA transcriptional coactivator and phosphatase 2        | -1.497 |
| 72255569  | Abca17                     | ATP-binding cassette, sub-family A (ABC1), member 17     | -1.495 |
| 157822647 | CD70                       | CD70 molecule                                            | -1.492 |
| 153791855 | Vmn2r116 (includes others) | vomer nasal 2, receptor 116                              | -1.485 |
| 157820579 | Lrrc51                     | leucine rich repeat containing 51                        | -1.481 |

|           |              |                                                      |        |
|-----------|--------------|------------------------------------------------------|--------|
| 157820541 | RGS9BP       | regulator of G protein signaling 9 binding protein   | -1.480 |
| 13929126  | GALNT5       | polypeptide N-acetylgalactosaminyltransferase 5      | -1.478 |
| 194474002 | MEI1         | meiotic double-stranded break formation protein 1    | -1.476 |
| 672028287 | Kat6b        | K(lysine) acetyltransferase 6B                       | -1.476 |
| 94400795  | PRLHR        | prolactin releasing hormone receptor                 | -1.474 |
| 162138928 | SLC13A3      | solute carrier family 13 member 3                    | -1.467 |
| 71043750  | SYNGR4       | synaptogyrin 4                                       | -1.464 |
| 242397466 | CTXN2        | cortexin 2                                           | -1.461 |
| 16758434  | DAO          | D-amino acid oxidase                                 | -1.459 |
| 13994171  | SLC22A2      | solute carrier family 22 member 2                    | -1.459 |
| 564305934 | BTBD19       | BTB domain containing 19                             | -1.458 |
| 18677739  | CDKN2B       | cyclin dependent kinase inhibitor 2B                 | -1.454 |
| 157823445 | PABPC4L      | poly(A) binding protein cytoplasmic 4 like           | -1.453 |
| 81295349  | SLC52A3      | solute carrier family 52 member 3                    | -1.453 |
| 148704234 | GJB2         | gap junction protein beta 2                          | -1.451 |
| 564357330 | N/A          | N/A                                                  | -1.446 |
| 157820117 | FBXL8        | F-box and leucine rich repeat protein 8              | -1.441 |
| 210032999 | MBOAT4       | membrane bound O-acyltransferase domain containing 4 | -1.441 |
| 675801992 | N/A          | N/A                                                  | -1.441 |
| 149052949 | N/A          | N/A                                                  | -1.436 |
| 672065933 | DOCK10       | dedicator of cytokinesis 10                          | -1.436 |
| 6981148   | LEP          | leptin                                               | -1.436 |
| 564317562 | CFAP70       | cilia and flagella associated protein 70             | -1.433 |
| 157818865 | INCA1        | inhibitor of CDK, cyclin A1 interacting protein 1    | -1.433 |
| 283806636 | ZNF831       | zinc finger protein 831                              | -1.433 |
| 31377521  | S1PR5        | sphingosine-1-phosphate receptor 5                   | -1.426 |
| 672019901 | LOC100361036 | rCG31267-like                                        | -1.420 |
| 1698696   | CMA1         | chymase 1                                            | -1.413 |
| 77917586  | GRAP2        | GRB2-related adaptor protein 2                       | -1.412 |
| 157818369 | Hils1        | histone H1-like protein in spermatids 1              | -1.411 |
| 752993027 | HSPB1        | heat shock protein family B (small) member 1         | -1.410 |
| 672042718 | ZBBX         | zinc finger B-box domain containing                  | -1.409 |
| 990011509 | N/A          | N/A                                                  | -1.409 |
| 19924087  | Akr1c14      | aldo-keto reductase family 1, member C14             | -1.406 |
| 158187526 | TFEC         | transcription factor EC                              | -1.402 |

|           |         |                                                            |        |
|-----------|---------|------------------------------------------------------------|--------|
| 157820935 | Prss32  | protease, serine 32                                        | -1.392 |
| 157822105 | SLC49A3 | solute carrier family 49 member 3                          | -1.389 |
| 293341722 | N/A     | N/A                                                        | -1.387 |
| 564314671 | VPS8    | VPS8, CORVET complex subunit                               | -1.386 |
| 157818431 | PPL     | periplakin                                                 | -1.385 |
| 157823809 | CD163   | CD163 molecule                                             | -1.385 |
| 149065466 | ARHGEF5 | Rho guanine nucleotide exchange factor 5                   | -1.382 |
| 18426832  | IL23A   | interleukin 23 subunit alpha                               | -1.381 |
| 564352410 | ARTN    | artemin                                                    | -1.379 |
| 157952196 | Tmem125 | transmembrane protein 125                                  | -1.379 |
| 149038394 | N/A     | N/A                                                        | -1.379 |
| 157822063 | Gm6377  | predicted gene 6377                                        | -1.379 |
| 48675870  | PPP1R3B | protein phosphatase 1 regulatory subunit 3B                | -1.379 |
| 166157470 | PSTPIP1 | proline-serine-threonine phosphatase interacting protein 1 | -1.376 |
| 209870097 | NLRP6   | NLR family pyrin domain containing 6                       | -1.375 |
| 157818677 | ALX4    | ALX homeobox 4                                             | -1.372 |
| 57526854  | IFI35   | interferon induced protein 35                              | -1.369 |
| 119709837 | SLC15A1 | solute carrier family 15 member 1                          | -1.364 |
| 568994911 | PHLDB2  | pleckstrin homology like domain family B member 2          | -1.350 |
| 148702636 | SPHK1   | sphingosine kinase 1                                       | -1.348 |
| 340523096 | IL10RA  | interleukin 10 receptor subunit alpha                      | -1.347 |
| 167830415 | Dcdc5   | doublecortin domain containing 5                           | -1.346 |
| 827012496 | NLRC4   | NLR family CARD domain containing 4                        | -1.346 |
| 672025117 | MBTD1   | mbt domain containing 1                                    | -1.344 |
| 6978717   | CTRB2   | chymotrypsinogen B2                                        | -1.342 |
| 149020413 | Zfp599  | zinc finger protein 599                                    | -1.342 |
| 20806113  | BAMBI   | BMP and activin membrane bound inhibitor                   | -1.338 |
| 157786780 | MELTF   | melanotransferrin                                          | -1.333 |
| 29789044  | SNAI2   | snail family transcriptional repressor 2                   | -1.328 |
| 148704682 | N/A     | N/A                                                        | -1.326 |
| 158187533 | ABCA13  | ATP binding cassette subfamily A member 13                 | -1.322 |
| 157786628 | ALOX12  | arachidonate 12-lipoxygenase, 12S type                     | -1.322 |
| 672070295 | BAHCC1  | BAH domain and coiled-coil containing 1                    | -1.322 |
| 157823345 | LRR1    | leucine rich repeat protein 1                              | -1.322 |
| 282847351 | LRRC36  | leucine rich repeat containing 36                          | -1.322 |
| 307746876 | Pzp     | PZP, alpha-2-macroglobulin like                            | -1.322 |
| 71043730  | VNN1    | vanin 1                                                    | -1.322 |
| 149047788 | ACVR1C  | activin A receptor type 1C                                 | -1.322 |

|           |                          |                                                       |        |
|-----------|--------------------------|-------------------------------------------------------|--------|
| 672071361 | CFAP44                   | cilia and flagella associated protein 44              | -1.322 |
| 293346251 | TMEM62                   | transmembrane protein 62                              | -1.322 |
| 300794534 | WDR93                    | WD repeat domain 93                                   | -1.322 |
| 149037646 | N/A                      | N/A                                                   | -1.316 |
| 226958688 | RBP4                     | retinol binding protein 4                             | -1.310 |
| 148689488 | SYN3                     | synapsin III                                          | -1.308 |
| 157824214 | FAM46B                   | family with sequence similarity 46 member B           | -1.301 |
| 1236083   | LSR                      | lipolysis stimulated lipoprotein receptor             | -1.290 |
| 61556810  | ADPRHL1                  | ADP-ribosylhydrolase like 1                           | -1.285 |
| 58865654  | EFEMP1                   | EGF containing fibulin extracellular matrix protein 1 | -1.284 |
| 57114286  | HLA-DRB5                 | major histocompatibility complex, class II, DR beta 5 | -1.284 |
| 816197606 | HTR6                     | 5-hydroxytryptamine receptor 6                        | -1.283 |
| 66730461  | Clec2d (includes others) | C-type lectin domain family 2, member D               | -1.282 |
| 209364566 | COL4A3                   | collagen type IV alpha 3 chain                        | -1.280 |
| 16758506  | SLFN12                   | schlafen family member 12                             | -1.280 |
| 568950651 | CYP2R1                   | cytochrome P450 family 2 subfamily R member 1         | -1.277 |
| 148694035 | SENP8                    | SUMO/sentrin peptidase family member, NEDD8 specific  | -1.276 |
| 409264670 | DHRS7C                   | dehydrogenase/reductase 7C                            | -1.273 |
| 71043878  | PROCR                    | protein C receptor                                    | -1.270 |
| 62656582  | KIAA0100                 | KIAA0100                                              | -1.266 |
| 2231145   | N/A                      | N/A                                                   | -1.264 |
| 13162326  | SLC27A5                  | solute carrier family 27 member 5                     | -1.263 |
| 672065139 | N/A                      | N/A                                                   | -1.263 |
| 162287073 | CRYBB1                   | crystallin beta B1                                    | -1.263 |
| 38303879  | LIPH                     | lipase H                                              | -1.263 |
| 157821835 | SCEL                     | sciellin                                              | -1.263 |
| 149034697 | N/A                      | N/A                                                   | -1.263 |
| 672034215 | ZNF729                   | zinc finger protein 729                               | -1.256 |
| 158186720 | SLC12A3                  | solute carrier family 12 member 3                     | -1.254 |
| 564312627 | ZFP62                    | ZFP62 zinc finger protein                             | -1.253 |
| 40018582  | LARGE2                   | LARGE xylosyl- and glucuronyltransferase 2            | -1.252 |
| 157821877 | ATP8B1                   | ATPase phospholipid transporting 8B1                  | -1.248 |
| 9910536   | RNASE4                   | ribonuclease A family member 4                        | -1.245 |
| 6981068   | ICAM1                    | intercellular adhesion molecule 1                     | -1.240 |
| 9506461   | CAPN1                    | calpain 1                                             | -1.237 |

|           |                      |                                                           |        |
|-----------|----------------------|-----------------------------------------------------------|--------|
| 672074150 | N/A                  | N/A                                                       | -1.230 |
| 8392900   | RUNX1                | runt related transcription factor 1                       | -1.222 |
| 157819007 | TBXT                 | T-box transcription factor T                              | -1.222 |
| 67078412  | LRRC63               | leucine rich repeat containing 63                         | -1.222 |
| 672019544 | N/A                  | N/A                                                       | -1.222 |
| 187281975 | DENND1C              | DENN domain containing 1C                                 | -1.216 |
| 672029435 | N/A                  | N/A                                                       | -1.216 |
| 224500890 | C1orf228             | chromosome 1 open reading frame 228                       | -1.209 |
| 16758338  | FTCD                 | formimidoyltransferase cyclodeaminase                     | -1.208 |
| 157824077 | CCRL2                | C-C motif chemokine receptor like 2                       | -1.206 |
| 157819399 | NOXO1                | NADPH oxidase organizer 1                                 | -1.206 |
| 157819313 | RGD1561661           | similar to Ferritin light chain (Ferritin L subunit)      | -1.206 |
| 672038049 | N/A                  | N/A                                                       | -1.206 |
| 56119141  | BTK                  | Bruton tyrosine kinase                                    | -1.205 |
| 157820267 | MEI4                 | meiotic double-stranded break formation protein 4         | -1.205 |
| 58865664  | SH2D4A               | SH2 domain containing 4A                                  | -1.204 |
| 50979278  | IL22RA2              | interleukin 22 receptor subunit alpha 2                   | -1.202 |
| 8393742   | MAG                  | myelin associated glycoprotein                            | -1.202 |
| 62945350  | C4orf36              | chromosome 4 open reading frame 36                        | -1.198 |
| 672040664 | CFAP43               | cilia and flagella associated protein 43                  | -1.198 |
| 155369293 | AEBP1                | AE binding protein 1                                      | -1.198 |
| 218505769 | Zfp7                 | zinc finger protein 7                                     | -1.191 |
| 564300462 | DCHS2                | dachsous cadherin-related 2                               | -1.190 |
| 157820725 | SUN5                 | Sad1 and UNC84 domain containing 5                        | -1.187 |
| 672033933 | N/A                  | N/A                                                       | -1.186 |
| 568924481 | COL25A1              | collagen type XXV alpha 1 chain                           | -1.185 |
| 6981332   | SERPINE1             | serpin family E member 1                                  | -1.184 |
| 564393142 | WDR36                | WD repeat domain 36                                       | -1.184 |
| 13928752  | PTGIS                | prostaglandin I2 synthase                                 | -1.183 |
| 149408137 | DHX58                | DExH-box helicase 58                                      | -1.183 |
| 300797201 | ENDOU                | endonuclease, poly(U) specific                            | -1.181 |
| 58866008  | TMC5                 | transmembrane channel like 5                              | -1.180 |
| 672037923 | N/A                  | N/A                                                       | -1.178 |
| 392334475 | RGD1560020_predicted | similar to Myb proto-oncogene protein (C-myb) (predicted) | -1.175 |
| 674082951 | N/A                  | N/A                                                       | -1.172 |
| 157820699 | ANGPT4               | angiopoietin 4                                            | -1.170 |
| 6981590   | IL1RL1               | interleukin 1 receptor like 1                             | -1.170 |

|           |               |                                                |        |
|-----------|---------------|------------------------------------------------|--------|
| 300795079 | STOX1         | storkhead box 1                                | -1.170 |
| 71795615  | UPP1          | uridine phosphorylase 1                        | -1.167 |
| 281332082 | THBS2         | thrombospondin 2                               | -1.164 |
| 58865684  | MCOLN3        | mucolipin 3                                    | -1.158 |
| 256574780 | TMEM212       | transmembrane protein 212                      | -1.158 |
| 11968076  | RHCE/RHD      | Rh blood group D antigen                       | -1.158 |
| 406035319 | KIRREL2       | kirre like nephrin family adhesion molecule 2  | -1.154 |
| 564311678 | PLEKHM3       | pleckstrin homology domain containing M3       | -1.152 |
| 564353313 | N/A           | N/A                                            | -1.144 |
| 282721071 | 4931409K22Rik | RIKEN cDNA 4931409K22 gene                     | -1.138 |
| 157818125 | CYP39A1       | cytochrome P450 family 39 subfamily A member 1 | -1.138 |
| 126723022 | NEU2          | neuraminidase 2                                | -1.138 |
| 157820223 | TBX4          | T-box 4                                        | -1.138 |
| 157823801 | SLC50A1       | solute carrier family 50 member 1              | -1.136 |
| 60223053  | SEPT1         | septin 1                                       | -1.133 |
| 148664561 | DTNA          | dystrobrevin alpha                             | -1.133 |
| 218156285 | CFB           | complement factor B                            | -1.130 |
| 51948494  | ITGB6         | integrin subunit beta 6                        | -1.129 |
| 57527560  | TMEM140       | transmembrane protein 140                      | -1.128 |
| 392331829 | ATAD5         | ATPase family, AAA domain containing 5         | -1.122 |
| 157823789 | PIK3AP1       | phosphoinositide-3-kinase adaptor protein 1    | -1.113 |
| 672017085 | N/A           | N/A                                            | -1.111 |
| 125347412 | FAM72A        | family with sequence similarity 72 member A    | -1.106 |
| 672034189 | N/A           | N/A                                            | -1.100 |
| 300798739 | MYO3B         | myosin IIIB                                    | -1.100 |
| 594061361 | N/A           | N/A                                            | -1.098 |
| 149053909 | COL1A1        | collagen type I alpha 1 chain                  | -1.092 |
| 564315753 | N/A           | N/A                                            | -1.092 |
| 197385083 | C1orf194      | chromosome 1 open reading frame 194            | -1.090 |
| 67078444  | EPN3          | epsin 3                                        | -1.090 |
| 156347833 | N/A           | N/A                                            | -1.090 |
| 24308484  | SLC17A8       | solute carrier family 17 member 8              | -1.089 |
| 157819247 | CPA4          | carboxypeptidase A4                            | -1.087 |
| 281371494 | LAMC2         | laminin subunit gamma 2                        | -1.087 |
| 564310671 | NBEAL2        | neurobeachin like 2                            | -1.084 |
| 320089574 | FAM161A       | family with sequence similarity 161 member A   | -1.080 |
| 300797017 | ATG16L2       | autophagy related 16 like 2                    | -1.079 |
| 157818961 | UBA7          | ubiquitin like modifier activating enzyme 7    | -1.078 |
| 70608161  | REEP4         | receptor accessory protein 4                   | -1.076 |

|           |              |                                                               |        |
|-----------|--------------|---------------------------------------------------------------|--------|
| 9910378   | CDC42SE2     | CDC42 small effector 2                                        | -1.069 |
| 564365960 | KIF9         | kinesin family member 9                                       | -1.066 |
| 18959230  | SLC6A20      | solute carrier family 6 member 20                             | -1.066 |
| 197384727 | Smco4        | single-pass membrane protein with coiled-coil domains 4       | -1.065 |
| 197386139 | SSC5D        | scavenger receptor cysteine rich family member with 5 domains | -1.060 |
| 564358455 | RASAL3       | RAS protein activator like 3                                  | -1.052 |
| 672020326 | MTA3         | metastasis associated 1 family member 3                       | -1.047 |
| 676272056 | N/A          | N/A                                                           | -1.046 |
| 189011701 | PPP1R42      | protein phosphatase 1 regulatory subunit 42                   | -1.044 |
| 58865636  | ART3         | ADP-ribosyltransferase 3                                      | -1.042 |
| 66730473  | DNAI1        | dynein axonemal intermediate chain 1                          | -1.042 |
| 164448680 | HBB          | hemoglobin subunit beta                                       | -1.042 |
| 157819141 | C6orf141     | chromosome 6 open reading frame 141                           | -1.040 |
| 11560040  | PTGDR        | prostaglandin D2 receptor                                     | -1.037 |
| 157817410 | ZNF474       | zinc finger protein 474                                       | -1.034 |
| 672015005 | N/A          | N/A                                                           | -1.033 |
| 149064010 | LTB4R2       | leukotriene B4 receptor 2                                     | -1.032 |
| 157822059 | HACD4        | 3-hydroxyacyl-CoA dehydratase 4                               | -1.031 |
| 672085160 | N/A          | N/A                                                           | -1.029 |
| 32189322  | ADGRG2       | adhesion G protein-coupled receptor G2                        | -1.027 |
| 7106240   | AKR7A3       | aldo-keto reductase family 7 member A3                        | -1.026 |
| 68226711  | LOC310926    | hypothetical protein LOC310926                                | -1.023 |
| 564310624 | CDHR4        | cadherin related family member 4                              | -1.021 |
| 297206838 | ARNTL2       | aryl hydrocarbon receptor nuclear translocator like 2         | -1.020 |
| 58865898  | LIMS2        | LIM zinc finger domain containing 2                           | -1.018 |
| 157821423 | TBX6         | T-box 6                                                       | -1.017 |
| 672033554 | LOC102557335 | uncharacterized LOC102557335                                  | -1.015 |
| 300797728 | MGST3        | microsomal glutathione S-transferase 3                        | -1.011 |
| 564296180 | CEP72        | centrosomal protein 72                                        | -1.005 |
| 68163493  | DAW1         | dynein assembly factor with WD repeats 1                      | -1.005 |
| 189181712 | CFAP161      | cilia and flagella associated protein 161                     | -1.003 |
| 1778213   | HSPD1        | heat shock protein family D (Hsp60) member 1                  | -1.002 |
| 564317722 | N/A          | N/A                                                           | -1.002 |
| 62078849  | USP18        | ubiquitin specific peptidase 18                               | -1.000 |
| 25453414  | ASS1         | argininosuccinate synthase 1                                  | -1.000 |
| 564380463 | CDK18        | cyclin dependent kinase 18                                    | -1.000 |
| 13929148  | CNGB1        | cyclic nucleotide gated channel beta 1                        | -1.000 |



|           |              |                                                                        |        |
|-----------|--------------|------------------------------------------------------------------------|--------|
| 197384591 | CYTL1        | cytokine like 1                                                        | -1.000 |
| 149025238 | ESRRB        | estrogen related receptor beta                                         | -1.000 |
| 392342053 | GK5          | glycerol kinase 5 (putative)                                           | -1.000 |
| 198386353 | MYO1G        | myosin IG                                                              | -1.000 |
| 156231008 | PRND         | prion like protein doppel                                              | -1.000 |
| 149056745 | N/A          | N/A                                                                    | -1.000 |
| 672067248 | N/A          | N/A                                                                    | -1.000 |
| 765826426 | Acot6        | acyl-CoA thioesterase 6                                                | -1.000 |
| 59676595  | FAM20A       | FAM20A, golgi associated secretory pathway pseudokinase                | -1.000 |
| 149054281 | CNTNAP1      | contactin associated protein 1                                         | -0.989 |
| 537234259 | N/A          | N/A                                                                    | -0.988 |
| 563404456 | CCL3L3       | C-C motif chemokine ligand 3 like 3                                    | -0.986 |
| 569009290 | TENM1        | teneurin transmembrane protein 1                                       | -0.985 |
| 672076451 | NCAPG        | non-SMC condensin I complex subunit G                                  | -0.984 |
| 880889841 | N/A          | N/A                                                                    | -0.983 |
| 300795496 | LAYN         | layilin                                                                | -0.983 |
| 158341649 | FAM227B      | family with sequence similarity 227 member B                           | -0.981 |
| 148679699 | N/A          | N/A                                                                    | -0.981 |
| 564324583 | N/A          | N/A                                                                    | -0.980 |
| 407228396 | THEMIS2      | thymocyte selection associated family member 2                         | -0.980 |
| 157817157 | C2orf70      | chromosome 2 open reading frame 70                                     | -0.979 |
| 672085160 | N/A          | N/A                                                                    | -0.978 |
| 942065067 | N/A          | N/A                                                                    | -0.977 |
| 215276950 | PKP2         | plakophilin 2                                                          | -0.973 |
| 20302089  | GABRR3       | gamma-aminobutyric acid type A receptor rho3 subunit (gene/pseudogene) | -0.972 |
| 68163517  | CCDC146      | coiled-coil domain containing 146                                      | -0.971 |
| 149053793 | TSPOAP1      | TSPO associated protein 1                                              | -0.970 |
| 564356749 | N/A          | N/A                                                                    | -0.969 |
| 564340633 | OLFML2A      | olfactomedin like 2A                                                   | -0.968 |
| 157819465 | CLEC9A       | C-type lectin domain containing 9A                                     | -0.967 |
| 564349125 | TEAD4        | TEA domain transcription factor 4                                      | -0.967 |
| 157819701 | Ctla2a       | cytotoxic T lymphocyte-associated protein 2 alpha                      | -0.966 |
| 157819493 | Igfbp1b      | immunoglobulin (CD79A) binding protein 1b                              | -0.966 |
| 20806163  | CKLF         | chemokine like factor                                                  | -0.962 |
| 672033256 | LOC100912904 | disks large homolog 5-like                                             | -0.960 |
| 395826410 | N/A          | N/A                                                                    | -0.959 |

|           |           |                                                               |        |
|-----------|-----------|---------------------------------------------------------------|--------|
| 157820951 | PRSS53    | protease, serine 53                                           | -0.959 |
| 564326123 | CDC42EP5  | CDC42 effector protein 5                                      | -0.958 |
| 157817989 | MDFI      | MyoD family inhibitor                                         | -0.958 |
| 16758344  | SEC16B    | SEC16 homolog B, endoplasmic reticulum export factor          | -0.958 |
| 672052120 | RBM12B    | RNA binding motif protein 12B                                 | -0.957 |
| 564392197 | LOC684327 | similar to inter-alpha (globulin) inhibitor H5                | -0.954 |
| 156231010 | CLDN6     | claudin 6                                                     | -0.954 |
| 157818989 | LRRC71    | leucine rich repeat containing 71                             | -0.952 |
| 157818275 | KCNG4     | potassium voltage-gated channel modifier subfamily G member 4 | -0.952 |
| 157820109 | SLC43A1   | solute carrier family 43 member 1                             | -0.950 |
| 24638442  | RLN3      | relaxin 3                                                     | -0.949 |
| 157823055 | EGFL6     | EGF like domain multiple 6                                    | -0.947 |
| 672062795 | N/A       | N/A                                                           | -0.944 |
| 9506907   | MSTN      | myostatin                                                     | -0.943 |
| 392339435 | WDR76     | WD repeat domain 76                                           | -0.943 |
| 124486586 | AUTS2     | AUTS2, activator of transcription and developmental regulator | -0.941 |
| 564299864 | N/A       | N/A                                                           | -0.940 |
| 148680846 | HIC1      | HIC ZBTB transcriptional repressor 1                          | -0.940 |
| 157823079 | RBKS      | ribokinase                                                    | -0.939 |
| 149035008 | Grifin    | galectin-related inter-fiber protein                          | -0.936 |
| 198442873 | CDC14A    | cell division cycle 14A                                       | -0.936 |
| 672071361 | CFAP44    | cilia and flagella associated protein 44                      | -0.934 |
| 16758094  | FABP4     | fatty acid binding protein 4                                  | -0.933 |
| 564315207 | TMEM270   | transmembrane protein 270                                     | -0.933 |
| 672088045 | N/A       | N/A                                                           | -0.932 |
| 71043648  | LOC499742 | LRRG00137                                                     | -0.931 |
| 6981176   | MAK       | male germ cell associated kinase                              | -0.931 |
| 40254742  | NCF1      | neutrophil cytosolic factor 1                                 | -0.929 |
| 62945330  | SLC8B1    | solute carrier family 8 member B1                             | -0.929 |
| 564395350 | N/A       | N/A                                                           | -0.927 |
| 532048106 | N/A       | N/A                                                           | -0.926 |
| 149043385 | N/A       | N/A                                                           | -0.925 |
| 50657416  | C1RL      | complement C1r subcomponent like                              | -0.918 |
| 58372166  | HAPLN2    | hyaluronan and proteoglycan link protein 2                    | -0.918 |
| 157819487 | TACO1     | translational activator of cytochrome c oxidase I             | -0.917 |
| 77993372  | PQLC3     | PQ loop repeat containing 3                                   | -0.917 |

|           |                      |                                                           |        |
|-----------|----------------------|-----------------------------------------------------------|--------|
| 47059114  | LTB                  | lymphotoxin beta                                          | -0.916 |
| 29789140  | GRM6                 | glutamate metabotropic receptor 6                         | -0.916 |
| 293347270 | OSGIN2               | oxidative stress induced growth inhibitor family member 2 | -0.915 |
| 564345430 | LOC100910079         | actin-related protein 3B-like                             | -0.913 |
| 164663906 | PDIA2                | protein disulfide isomerase family A member 2             | -0.909 |
| 157821719 | CPM                  | carboxypeptidase M                                        | -0.908 |
| 148677539 | N/A                  | N/A                                                       | -0.908 |
| 207446698 | FA2H                 | fatty acid 2-hydroxylase                                  | -0.907 |
| 564325648 | Zfp54                | zinc finger protein 54                                    | -0.907 |
| 564318923 | WDR17                | WD repeat domain 17                                       | -0.904 |
| 149050847 | POMC                 | proopiomelanocortin                                       | -0.904 |
| 58865836  | SP140                | SP140 nuclear body protein                                | -0.903 |
| 589937133 | N/A                  | N/A                                                       | -0.902 |
| 16758080  | COL1A2               | collagen type I alpha 2 chain                             | -0.900 |
| 157819945 | ARPIN/C15orf38-AP3S2 | C15orf38-AP3S2 readthrough                                | -0.899 |
| 672016875 | LOC103690320         | FERM and PDZ domain-containing protein 3                  | -0.897 |
| 564382020 | TMEM63A              | transmembrane protein 63A                                 | -0.896 |
| 564342055 | Apip                 | APAF1 interacting protein                                 | -0.894 |
| 47576123  | Olr1387/Olr1388      | olfactory receptor 1387                                   | -0.893 |
| 157822605 | OTOR                 | otoraplin                                                 | -0.893 |
| 14861868  | Ptprv                | protein tyrosine phosphatase, receptor type, V            | -0.893 |
| 13540697  | NOV                  | nephroblastoma overexpressed                              | -0.893 |
| 38454316  | TLR3                 | toll like receptor 3                                      | -0.891 |
| 329755323 | ATP13A4              | ATPase 13A4                                               | -0.889 |
| 157824138 | LURAP1               | leucine rich adaptor protein 1                            | -0.888 |
| 12621098  | EPHX2                | epoxide hydrolase 2                                       | -0.887 |
| 157821417 | KERA                 | keratocan                                                 | -0.885 |
| 13540656  | EMP3                 | epithelial membrane protein 3                             | -0.883 |
| 564377419 | THPO                 | thrombopoietin                                            | -0.882 |
| 149069514 | N/A                  | N/A                                                       | -0.881 |
| 657940868 | PALLD                | palladin, cytoskeletal associated protein                 | -0.881 |
| 407228403 | EVI2B                | ecotropic viral integration site 2B                       | -0.880 |
| 149056256 | FXVD5                | FXVD domain containing ion transport regulator 5          | -0.880 |
| 148670853 | BBOF1                | basal body orientation factor 1                           | -0.878 |
| 392351290 | DNAH9                | dynein axonemal heavy chain 9                             | -0.875 |
| 19424166  | FBXO32               | F-box protein 32                                          | -0.874 |
| 564312627 | ZFP62                | ZFP62 zinc finger protein                                 | -0.871 |

|           |                                |                                                  |        |
|-----------|--------------------------------|--------------------------------------------------|--------|
| 209870105 | GPR37L1                        | G protein-coupled receptor 37 like 1             | -0.870 |
| 8393123   | CHRM5                          | cholinergic receptor muscarinic 5                | -0.869 |
| 564321163 | CHD9                           | chromodomain helicase DNA binding protein 9      | -0.868 |
| 157817185 | PPCDC                          | phosphopantothenoylcysteine decarboxylase        | -0.866 |
| 672036437 | ACP4                           | acid phosphatase 4                               | -0.862 |
| 3420792   | N/A                            | N/A                                              | -0.862 |
| 57114338  | SCN4B                          | sodium voltage-gated channel beta subunit 4      | -0.859 |
| 672022227 | RGS22                          | regulator of G protein signaling 22              | -0.855 |
| 148747412 | CBWD1                          | COBW domain containing 1                         | -0.855 |
| 62945324  | LCA5L                          | LCA5L, lebercilin like                           | -0.853 |
| 149031998 | ACVRL1                         | activin A receptor like type 1                   | -0.852 |
| 672076690 | N/A                            | N/A                                              | -0.851 |
| 6978791   | EDN1                           | endothelin 1                                     | -0.850 |
| 119226204 | CFAP206                        | cilia and flagella associated protein 206        | -0.849 |
| 201861483 | LOC102548396 (includes others) | zinc finger protein 951                          | -0.848 |
| 148690904 | NTF4                           | neurotrophin 4                                   | -0.848 |
| 261337179 | TMPRSS7                        | transmembrane protease, serine 7                 | -0.848 |
| 77020254  | GPR182                         | G protein-coupled receptor 182                   | -0.845 |
| 672029530 | NEK5                           | NIMA related kinase 5                            | -0.842 |
| 672087474 | REPS2                          | RALBP1 associated Eps domain containing 2        | -0.841 |
| 672087474 | REPS2                          | RALBP1 associated Eps domain containing 2        | -0.841 |
| 61557366  | SELPLG                         | selectin P ligand                                | -0.841 |
| 672064087 | N/A                            | N/A                                              | -0.841 |
| 392340768 | DISP3                          | dispatched RND transporter family member 3       | -0.840 |
| 227116255 | P2RX6                          | purinergic receptor P2X 6                        | -0.838 |
| 38454288  | P4HA3                          | prolyl 4-hydroxylase subunit alpha 3             | -0.838 |
| 564311658 | N/A                            | N/A                                              | -0.837 |
| 6980958   | SLC2A4                         | solute carrier family 2 member 4                 | -0.837 |
| 157822283 | HS3ST6                         | heparan sulfate-glucosamine 3-sulfotransferase 6 | -0.835 |
| 564387882 | IL17RB                         | interleukin 17 receptor B                        | -0.835 |
| 392334002 | CCDC3                          | coiled-coil domain containing 3                  | -0.833 |
| 564366187 | LOC100361039 (includes others) | similar to nidogen 2                             | -0.833 |
| 157822457 | SYNC                           | syncoilin, intermediate filament protein         | -0.833 |
| 564373460 | SLFN13                         | schlafen family member 13                        | -0.831 |
| 157821851 | C5orf52                        | chromosome 5 open reading frame 52               | -0.830 |
| 157821541 | ACSS3                          | acyl-CoA synthetase short chain family member 3  | -0.830 |

|           |                             |                                                                                                 |        |
|-----------|-----------------------------|-------------------------------------------------------------------------------------------------|--------|
| 56605720  | GADD45B                     | growth arrest and DNA damage inducible beta                                                     | -0.828 |
| 61740621  | RARRES2                     | retinoic acid receptor responder 2                                                              | -0.826 |
| 6980992   | GSTT2/GSTT2B                | glutathione S-transferase theta 2 (gene/pseudogene)                                             | -0.824 |
| 149038682 | Srgn                        | serglycin                                                                                       | -0.823 |
| 672063869 | MGC116197 (includes others) | similar to RIKEN cDNA 1700001E04                                                                | -0.823 |
| 564372514 | SHBG                        | sex hormone binding globulin                                                                    | -0.822 |
| 157823295 | OLFM4                       | olfactomedin 4                                                                                  | -0.817 |
| 672067229 | N/A                         | N/A                                                                                             | -0.816 |
| 148675846 | FAM114A2                    | family with sequence similarity 114 member A2                                                   | -0.814 |
| 392333201 | CFAP70                      | cilia and flagella associated protein 70                                                        | -0.813 |
| 564342320 | FSIP1                       | fibrous sheath interacting protein 1                                                            | -0.813 |
| 149042883 | LOC100365365                | rCG32328-like                                                                                   | -0.812 |
| 58865784  | GPR157                      | G protein-coupled receptor 157                                                                  | -0.812 |
| 564343851 | BPIFB1                      | BPI fold containing family B member 1                                                           | -0.807 |
| 16758272  | CPN1                        | carboxypeptidase N subunit 1                                                                    | -0.807 |
| 53791211  | PHOX2A                      | paired like homeobox 2a                                                                         | -0.807 |
| 37591183  | SLC10A6                     | solute carrier family 10 member 6                                                               | -0.807 |
| 300795865 | SLC15A5                     | solute carrier family 15 member 5                                                               | -0.807 |
| 157817065 | KCNK16                      | potassium two pore domain channel subfamily K member 16                                         | -0.807 |
| 880882276 | N/A                         | N/A                                                                                             | -0.807 |
| 259089426 | AGER                        | advanced glycosylation end-product specific receptor                                            | -0.804 |
| 672044124 | N/A                         | N/A                                                                                             | -0.803 |
| 564300659 | CGN                         | cingulin                                                                                        | -0.801 |
| 672045595 | RIF1                        | replication timing regulatory factor 1                                                          | -0.799 |
| 564396113 | ZCCHC14                     | zinc finger CCHC-type containing 14                                                             | -0.797 |
| 157821153 | ECHDC2                      | enoyl-CoA hydratase domain containing 2                                                         | -0.796 |
| 58865924  | RSPH1                       | radial spoke head 1 homolog                                                                     | -0.795 |
| 61556945  | MOAP1                       | modulator of apoptosis 1                                                                        | -0.795 |
| 564388219 | ARHGAP22                    | Rho GTPase activating protein 22                                                                | -0.795 |
| 109480098 | SMARCC2                     | SWI/SNF related, matrix associated, actin dependent regulator of chromatin subfamily c member 2 | -0.795 |
| 148701441 | N/A                         | N/A                                                                                             | -0.794 |
| 8393053   | CASR                        | calcium sensing receptor                                                                        | -0.794 |
| 199561637 | PSD4                        | pleckstrin and Sec7 domain containing 4                                                         | -0.794 |
| 672015213 | N/A                         | N/A                                                                                             | -0.794 |

|           |          |                                                                      |        |
|-----------|----------|----------------------------------------------------------------------|--------|
| 564314685 | EIF4G1   | eukaryotic translation initiation factor 4 gamma 1                   | -0.793 |
| 157817819 | CCDC103  | coiled-coil domain containing 103                                    | -0.791 |
| 16924012  | TNFSF11  | TNF superfamily member 11                                            | -0.791 |
| 564345556 | CROT     | carnitine O-octanoyltransferase                                      | -0.790 |
| 300798598 | MYOF     | myoferlin                                                            | -0.790 |
| 402692079 | PFKFB1   | 6-phosphofructo-2-kinase/fructose-2,6-biphosphatase 1                | -0.788 |
| 300798165 | ZBTB40   | zinc finger and BTB domain containing 40                             | -0.788 |
| 18426812  | ADA      | adenosine deaminase                                                  | -0.787 |
| 62078891  | ZC2HC1C  | zinc finger C2HC-type containing 1C                                  | -0.786 |
| 16758318  | PDK4     | pyruvate dehydrogenase kinase 4                                      | -0.783 |
| 67846074  | EHD2     | EH domain containing 2                                               | -0.782 |
| 281306773 | Htr5b    | 5-hydroxytryptamine (serotonin) receptor 5B                          | -0.782 |
| 162287322 | LSP1     | lymphocyte-specific protein 1                                        | -0.781 |
| 829944637 | N/A      | N/A                                                                  | -0.780 |
| 307548437 | NYAP2    | neuronal tyrosine-phosphorylated phosphoinositide-3-kinase adaptor 2 | -0.780 |
| 149059246 | N/A      | N/A                                                                  | -0.778 |
| 74178753  | DENND2D  | DENN domain containing 2D                                            | -0.778 |
| 194474096 | Gpihbp1  | GPI-anchored HDL-binding protein 1                                   | -0.778 |
| 157786718 | OTOP2    | otopetrin 2                                                          | -0.778 |
| 157819203 | TECTA    | tectorin alpha                                                       | -0.778 |
| 148702528 | OTOP3    | otopetrin 3                                                          | -0.776 |
| 157818565 | CFAP126  | cilia and flagella associated protein 126                            | -0.775 |
| 942523340 | CAPRIN2  | caprin family member 2                                               | -0.774 |
| 392352101 | LRCH3    | leucine rich repeats and calponin homology domain containing 3       | -0.773 |
| 157819205 | EFHC2    | EF-hand domain containing 2                                          | -0.772 |
| 55741827  | TERT     | telomerase reverse transcriptase                                     | -0.771 |
| 818015    | HBB      | hemoglobin subunit beta                                              | -0.770 |
| 157819467 | C19orf71 | chromosome 19 open reading frame 71                                  | -0.769 |
| 197386131 | Acad10   | acyl-CoA dehydrogenase family, member 10                             | -0.768 |
| 564298020 | KCTD14   | potassium channel tetramerization domain containing 14               | -0.767 |
| 61097937  | VEGFB    | vascular endothelial growth factor B                                 | -0.766 |
| 197385174 | ENO4     | enolase family member 4                                              | -0.766 |
| 157820387 | SLC17A9  | solute carrier family 17 member 9                                    | -0.766 |
| 56090397  | CYB5D2   | cytochrome b5 domain containing 2                                    | -0.764 |
| 13928758  | CTSK     | cathepsin K                                                          | -0.761 |

|           |                 |                                                                                 |        |
|-----------|-----------------|---------------------------------------------------------------------------------|--------|
| 74177759  | RPS2            | ribosomal protein S2                                                            | -0.761 |
| 57528269  | ABHD14A         | abhydrolase domain containing 14A                                               | -0.760 |
| 625217421 | N/A             | N/A                                                                             | -0.760 |
| 148664646 | GYPC            | glycophorin C (Gerbich blood group)                                             | -0.760 |
| 58865632  | ARHGAP24        | Rho GTPase activating protein 24                                                | -0.758 |
| 672023936 | N/A             | N/A                                                                             | -0.758 |
| 27465577  | Cyp4f16/Cyp4f37 | cytochrome P450, family 4, subfamily f, polypeptide 16                          | -0.758 |
| 71361637  | STRA6           | stimulated by retinoic acid 6                                                   | -0.757 |
| 18158435  | TACR2           | tachykinin receptor 2                                                           | -0.757 |
| 13591914  | ANPEP           | alanyl aminopeptidase, membrane                                                 | -0.757 |
| 293349343 | MYO6            | myosin VI                                                                       | -0.755 |
| 16758804  | ACACB           | acetyl-CoA carboxylase beta                                                     | -0.755 |
| 66730425  | MGC105567       | similar to cDNA sequence BC023105                                               | -0.755 |
| 589918901 | N/A             | N/A                                                                             | -0.755 |
| 309319796 | COL18A1         | collagen type XVIII alpha 1 chain                                               | -0.754 |
| 564307792 | TECPR2          | tectonin beta-propeller repeat containing 2                                     | -0.753 |
| 157822593 | NEIL2           | nei like DNA glycosylase 2                                                      | -0.753 |
| 189011669 | FERMT3          | fermitin family member 3                                                        | -0.751 |
| 319009550 | PPM1N           | protein phosphatase, Mg <sup>2+</sup> /Mn <sup>2+</sup> dependent 1N (putative) | -0.750 |
| 30794230  | TNFRSF1B        | TNF receptor superfamily member 1B                                              | -0.749 |
| 672069802 | C1QTNF1         | C1q and TNF related 1                                                           | -0.749 |
| 157821431 | GAL3ST1         | galactose-3-O-sulfotransferase 1                                                | -0.748 |
| 255652942 | EFCC1           | EF-hand and coiled-coil domain containing 1                                     | -0.747 |
| 194473640 | FAM109B         | family with sequence similarity 109 member B                                    | -0.746 |
| 281427214 | TRADD           | TNFRSF1A associated via death domain                                            | -0.746 |
| 149056609 | DEDD2           | death effector domain containing 2                                              | -0.745 |
| 564312886 | DNAH2           | dynein axonemal heavy chain 2                                                   | -0.740 |
| 157786850 | TUBD1           | tubulin delta 1                                                                 | -0.740 |
| 46485412  | ABCA7           | ATP binding cassette subfamily A member 7                                       | -0.739 |
| 13242287  | HES5            | hes family bHLH transcription factor 5                                          | -0.737 |
| 149057856 | ADRB3           | adrenoceptor beta 3                                                             | -0.737 |
| 53850642  | AKAP3           | A-kinase anchoring protein 3                                                    | -0.737 |
| 12621132  | FAT2            | FAT atypical cadherin 2                                                         | -0.737 |
| 149032986 | MFSD4B          | major facilitator superfamily domain containing 4B                              | -0.737 |
| 585191689 | N/A             | N/A                                                                             | -0.737 |
| 157822391 | OTOG            | otogelin                                                                        | -0.737 |
| 13929084  | THBD            | thrombomodulin                                                                  | -0.732 |

|           |          |                                                                              |        |
|-----------|----------|------------------------------------------------------------------------------|--------|
| 56119147  | ARRDC3   | arrestin domain containing 3                                                 | -0.732 |
| 672089518 | N/A      | N/A                                                                          | -0.728 |
| 672022615 | N/A      | N/A                                                                          | -0.728 |
| 13929156  | MYBPH    | myosin binding protein H                                                     | -0.728 |
| 68163370  | CARNMT1  | carnosine N-methyltransferase 1                                              | -0.724 |
| 208973286 | RBM46    | RNA binding motif protein 46                                                 | -0.724 |
| 402534539 | C2orf40  | chromosome 2 open reading frame 40                                           | -0.723 |
| 76253906  | CASP4    | caspace 4                                                                    | -0.722 |
| 16758232  | PLCB2    | phospholipase C beta 2                                                       | -0.721 |
| 19173756  | ERG      | ERG, ETS transcription factor                                                | -0.718 |
| 568939712 | KCP      | kielin/chordin-like protein                                                  | -0.718 |
| 157821145 | DQX1     | DEAQ-box RNA dependent ATPase 1                                              | -0.718 |
| 148669751 | SMNDC1   | survival motor neuron domain containing 1                                    | -0.717 |
| 568927637 | ADAMTSL1 | ADAMTS like 1                                                                | -0.716 |
| 149062459 | MS4A2    | membrane spanning 4-domains A2                                               | -0.716 |
| 58219500  | SLC10A7  | solute carrier family 10 member 7                                            | -0.716 |
| 149047075 | Spaca6   | sperm acrosome associated 6                                                  | -0.715 |
| 148704596 | L3HYPDH  | trans-L-3-hydroxyproline dehydratase                                         | -0.715 |
| 27465603  | AKR1B10  | aldo-keto reductase family 1 member B10                                      | -0.714 |
| 6981108   | ITGB4    | integrin subunit beta 4                                                      | -0.712 |
| 68341959  | CASTOR1  | cytosolic arginine sensor for mTORC1 subunit 1                               | -0.712 |
| 148701845 | RACK1    | receptor for activated C kinase 1                                            | -0.710 |
| 672076581 | N/A      | N/A                                                                          | -0.707 |
| 672080683 | Tmem255b | transmembrane protein 255B                                                   | -0.707 |
| 564378828 | TFR2     | transferrin receptor 2                                                       | -0.707 |
| 564400341 | N/A      | N/A                                                                          | -0.706 |
| 66730475  | Tpm2     | tropomyosin 2, beta                                                          | -0.705 |
| 157818511 | CCDC190  | coiled-coil domain containing 190                                            | -0.705 |
| 8393922   | PCTP     | phosphatidylcholine transfer protein                                         | -0.705 |
| 672057367 | N/A      | N/A                                                                          | -0.704 |
| 54312100  | DNAJB13  | DnaJ heat shock protein family (Hsp40) member B13                            | -0.703 |
| 62644808  | ADAMTSL2 | ADAMTS like 2                                                                | -0.699 |
| 55742713  | ECM1     | extracellular matrix protein 1                                               | -0.699 |
| 157816997 | BDH2     | 3-hydroxybutyrate dehydrogenase 2                                            | -0.698 |
| 40018618  | CBX7     | chromobox 7                                                                  | -0.698 |
| 281332190 | APBB1IP  | amyloid beta precursor protein binding family B member 1 interacting protein | -0.696 |
| 148671621 | VIP      | vasoactive intestinal peptide                                                | -0.696 |



|           |              |                                                          |        |
|-----------|--------------|----------------------------------------------------------|--------|
| 157786678 | Cisd3        | CDGSH iron sulfur domain 3                               | -0.695 |
| 401461786 | CP           | ceruloplasmin                                            | -0.695 |
| 672064415 | LOC103693202 | uncharacterized LOC103693202                             | -0.693 |
| 293343546 | C5orf49      | chromosome 5 open reading frame 49                       | -0.693 |
| 564393107 | TMEM173      | transmembrane protein 173                                | -0.693 |
| 48675865  | PDP2         | pyruvate dehydrogenase phosphatase catalytic subunit 2   | -0.692 |
| 113206040 | LRRC34       | leucine rich repeat containing 34                        | -0.690 |
| 564317714 | Ktn1         | kinectin 1                                               | -0.687 |
| 149066381 | DSCC1        | DNA replication and sister chromatid cohesion 1          | -0.687 |
| 157823213 | CAPSL        | calcyphosine like                                        | -0.687 |
| 300794452 | PTPRH        | protein tyrosine phosphatase, receptor type H            | -0.687 |
| 803217203 | N/A          | N/A                                                      | -0.686 |
| 157821197 | C9orf135     | chromosome 9 open reading frame 135                      | -0.683 |
| 149053566 | N/A          | N/A                                                      | -0.683 |
| 672072376 | N/A          | N/A                                                      | -0.683 |
| 77917598  | TMCO4        | transmembrane and coiled-coil domains 4                  | -0.682 |
| 149047375 | CCDC96       | coiled-coil domain containing 96                         | -0.682 |
| 46485501  | CDH15        | cadherin 15                                              | -0.681 |
| 672046728 | N/A          | N/A                                                      | -0.681 |
| 300797913 | PALB2        | partner and localizer of BRCA2                           | -0.679 |
| 71043800  | STPG1        | sperm tail PG-rich repeat containing 1                   | -0.679 |
| 62821825  | OPALIN       | oligodendrocytic myelin paranodal and inner loop protein | -0.678 |
| 38454234  | COL27A1      | collagen type XXVII alpha 1 chain                        | -0.677 |
| 11993952  | SRPX         | sushi repeat containing protein, X-linked                | -0.677 |
| 33286888  | GJA1         | gap junction protein alpha 1                             | -0.675 |
| 564320335 | TMEM241      | transmembrane protein 241                                | -0.675 |
| 148706223 | ZNRF4        | zinc and ring finger 4                                   | -0.675 |
| 148691168 | N/A          | N/A                                                      | -0.675 |
| 402745263 | COL11A1      | collagen type XI alpha 1 chain                           | -0.672 |
| 293349725 | AMER3        | APC membrane recruitment protein 3                       | -0.672 |
| 189491877 | MYADML2      | myeloid associated differentiation marker like 2         | -0.671 |
| 149039662 | LAMA2        | laminin subunit alpha 2                                  | -0.670 |
| 568986424 | Prrx1l       | paired related homeobox protein-like 1                   | -0.667 |
| 74142284  | DSE          | dermatan sulfate epimerase                               | -0.667 |
| 157818909 | Zim1         | zinc finger, imprinted 1                                 | -0.665 |
| 67514566  | POLA2        | DNA polymerase alpha 2, accessory subunit                | -0.665 |
| 58866014  | CATSPER2     | cation channel sperm associated 2                        | -0.664 |

|           |           |                                                                |        |
|-----------|-----------|----------------------------------------------------------------|--------|
| 672038314 | N/A       | N/A                                                            | -0.664 |
| 672057459 | DGKA      | diacylglycerol kinase alpha                                    | -0.664 |
| 281427186 | CHST9     | carbohydrate sulfotransferase 9                                | -0.661 |
| 13592057  | RPL18     | ribosomal protein L18                                          | -0.660 |
| 305682588 | PDZD7     | PDZ domain containing 7                                        | -0.660 |
| 672081701 | N/A       | N/A                                                            | -0.660 |
| 70912395  | C3orf67   | chromosome 3 open reading frame 67                             | -0.659 |
| 201861690 | TPK1      | thiamin pyrophosphokinase 1                                    | -0.657 |
| 114145782 | MORN5     | MORN repeat containing 5                                       | -0.657 |
| 158262033 | PAH       | phenylalanine hydroxylase                                      | -0.655 |
| 157824216 | RRAS      | RAS related                                                    | -0.655 |
| 514450311 | N/A       | N/A                                                            | -0.655 |
| 9845261   | LGALS1    | galectin 1                                                     | -0.655 |
| 300794803 | SYNPO2    | synaptopodin 2                                                 | -0.655 |
| 164565435 | SYNJ2     | synaptojanin 2                                                 | -0.654 |
| 8392864   | ADORA2B   | adenosine A2b receptor                                         | -0.654 |
| 281306821 | HEY2      | hes related family bHLH transcription factor with YRPW motif 2 | -0.653 |
| 157823283 | Coch      | cochlin                                                        | -0.653 |
| 82617598  | SLC5A3    | solute carrier family 5 member 3                               | -0.652 |
| 564350366 | N/A       | N/A                                                            | -0.652 |
| 149066324 | LOC690120 | hypothetical protein LOC690120                                 | -0.652 |
| 157817426 | MISP      | mitotic spindle positioning                                    | -0.652 |
| 281332078 | TTLL2     | tubulin tyrosine ligase like 2                                 | -0.652 |
| 157822365 | LAMC3     | laminin subunit gamma 3                                        | -0.651 |
| 119226202 | CDC42EP1  | CDC42 effector protein 1                                       | -0.651 |
| 672064676 | N/A       | N/A                                                            | -0.649 |
| 47059173  | IER3      | immediate early response 3                                     | -0.649 |
| 157819783 | IRF6      | interferon regulatory factor 6                                 | -0.648 |
| 77020281  | CD55      | CD55 molecule (Cromer blood group)                             | -0.648 |
| 672039742 | TKFC      | triokinase and FMN cyclase                                     | -0.646 |
| 62079183  | CCT6B     | chaperonin containing TCP1 subunit 6B                          | -0.646 |
| 68534736  | ERAP1     | endoplasmic reticulum aminopeptidase 1                         | -0.646 |
| 260593702 | Slc26a10  | solute carrier family 26, member 10                            | -0.646 |
| 564348231 | RPUSD3    | RNA pseudouridylate synthase domain containing 3               | -0.645 |
| 197333844 | LLPH      | LLP homolog, long-term synaptic facilitation                   | -0.644 |
| 13928928  | NAPSA     | napsin A aspartic peptidase                                    | -0.644 |
| 157816915 | ZNF438    | zinc finger protein 438                                        | -0.643 |
| 564316927 | FRYL      | FRY like transcription coactivator                             | -0.643 |

|           |          |                                                                                |        |
|-----------|----------|--------------------------------------------------------------------------------|--------|
| 13591940  | DPYD     | dihydropyrimidine dehydrogenase                                                | -0.642 |
| 13786136  | PDGFC    | platelet derived growth factor C                                               | -0.642 |
| 187469467 | SMPD5    | sphingomyelin phosphodiesterase 5                                              | -0.642 |
| 293340128 | MIEF2    | mitochondrial elongation factor 2                                              | -0.642 |
| 25742776  | MC4R     | melanocortin 4 receptor                                                        | -0.641 |
| 148665664 | PHLDB2   | pleckstrin homology like domain family B member 2                              | -0.641 |
| 158508544 | DDR2     | discoidin domain receptor tyrosine kinase 2                                    | -0.640 |
| 300794353 | FANCL    | Fanconi anemia complementation group L                                         | -0.639 |
| 157786864 | PHOSPHO1 | phosphoethanolamine/phosphocholine phosphatase                                 | -0.638 |
| 392355027 | TANGO6   | transport and golgi organization 6 homolog                                     | -0.638 |
| 149061352 | ADAM12   | ADAM metallopeptidase domain 12                                                | -0.638 |
| 71043760  | RRM2     | ribonucleotide reductase regulatory subunit M2                                 | -0.637 |
| 672060362 | ELFN2    | extracellular leucine rich repeat and fibronectin type III domain containing 2 | -0.636 |
| 187282311 | ISLR     | immunoglobulin superfamily containing leucine rich repeat                      | -0.635 |
| 19424350  | GBP2     | guanylate binding protein 2                                                    | -0.635 |
| 58865948  | CREB3L2  | cAMP responsive element binding protein 3 like 2                               | -0.634 |
| 31542804  | FCGR2A   | Fc fragment of IgG receptor IIa                                                | -0.633 |
| 50657355  | TOP1MT   | DNA topoisomerase I mitochondrial                                              | -0.632 |
| 672076564 | DDC      | dopa decarboxylase                                                             | -0.632 |
| 157821105 | SLC4A11  | solute carrier family 4 member 11                                              | -0.632 |
| 34734058  | HCK      | HCK proto-oncogene, Src family tyrosine kinase                                 | -0.631 |
| 880911340 | N/A      | N/A                                                                            | -0.630 |
| 672053201 | N/A      | N/A                                                                            | -0.630 |
| 392334060 | LAMA3    | laminin subunit alpha 3                                                        | -0.630 |
| 11968122  | PLLP     | plasmolipin                                                                    | -0.630 |
| 8394221   | Rps3a1   | ribosomal protein S3A1                                                         | -0.630 |
| 397529557 | C8orf58  | chromosome 8 open reading frame 58                                             | -0.629 |
| 13591916  | ABCC6    | ATP binding cassette subfamily C member 6                                      | -0.628 |
| 157824208 | NTNG1    | netrin G1                                                                      | -0.628 |
| 300797715 | NDST4    | N-deacetylase and N-sulfotransferase 4                                         | -0.627 |
| 58865854  | SCRN2    | secernin 2                                                                     | -0.627 |
| 16758622  | IFT172   | intraflagellar transport 172                                                   | -0.627 |
| 149038530 | CCDC170  | coiled-coil domain containing 170                                              | -0.626 |

|           |                                |                                                                 |        |
|-----------|--------------------------------|-----------------------------------------------------------------|--------|
| 564395215 | LOC100909409 (includes others) | RGD1562660                                                      | -0.626 |
| 672031392 | N/A                            | N/A                                                             | -0.626 |
| 74203836  | PNPLA7                         | patatin like phospholipase domain containing 7                  | -0.626 |
| 1763306   | UNC13C                         | unc-13 homolog C                                                | -0.626 |
| 157818465 | P2ry10b                        | purinergic receptor P2Y, G-protein coupled 10B                  | -0.624 |
| 731457978 | N/A                            | N/A                                                             | -0.624 |
| 672013308 | CCER2                          | coiled-coil glutamate rich protein 2                            | -0.621 |
| 157817396 | MIS18BP1                       | MIS18 binding protein 1                                         | -0.621 |
| 760997729 | SYNPO2L                        | synaptopodin 2 like                                             | -0.621 |
| 197927137 | WDR63                          | WD repeat domain 63                                             | -0.621 |
| 157819949 | ITGA4                          | integrin subunit alpha 4                                        | -0.620 |
| 402744047 | SLC25A18                       | solute carrier family 25 member 18                              | -0.620 |
| 157786914 | OGFOD2                         | 2-oxoglutarate and iron dependent oxygenase domain containing 2 | -0.618 |
| 685536628 | N/A                            | N/A                                                             | -0.618 |
| 16758284  | SLC5A7                         | solute carrier family 5 member 7                                | -0.618 |
| 672058561 | N/A                            | N/A                                                             | -0.618 |
| 169234854 | SPATC1                         | spermatogenesis and centriole associated 1                      | -0.617 |
| 166157468 | CLMN                           | calmin                                                          | -0.616 |
| 62945382  | SERTAD3                        | SERTA domain containing 3                                       | -0.616 |
| 478732983 | MAP3K5                         | mitogen-activated protein kinase kinase kinase 5                | -0.616 |
| 62078563  | CD302                          | CD302 molecule                                                  | -0.613 |
| 672042306 | N/A                            | N/A                                                             | -0.613 |
| 672078695 | N/A                            | N/A                                                             | -0.612 |
| 281427233 | WISP3                          | WNT1 inducible signaling pathway protein 3                      | -0.611 |
| 672020846 | N/A                            | N/A                                                             | -0.610 |
| 157821551 | EBI3                           | Epstein-Barr virus induced 3                                    | -0.609 |
| 655832893 | N/A                            | N/A                                                             | -0.608 |
| 402478640 | HTRA3                          | HtrA serine peptidase 3                                         | -0.608 |
| 149068766 | PLEKHB1                        | pleckstrin homology domain containing B1                        | -0.608 |
| 157819065 | ADAMTS15                       | ADAM metallopeptidase with thrombospondin type 1 motif 15       | -0.604 |
| 672014740 | MAMDC2                         | MAM domain containing 2                                         | -0.603 |
| 401709944 | MPP7                           | membrane palmitoylated protein 7                                | -0.603 |
| 157818181 | GPR146                         | G protein-coupled receptor 146                                  | -0.602 |
| 157818491 | DUS2                           | dihydrouridine synthase 2                                       | -0.602 |
| 27465529  | SLC9A4                         | solute carrier family 9 member A4                               | -0.601 |

|           |         |                                                  |        |
|-----------|---------|--------------------------------------------------|--------|
| 17939358  | GPR83   | G protein-coupled receptor 83                    | -0.600 |
| 29789038  | BMP6    | bone morphogenetic protein 6                     | -0.600 |
| 56605940  | RXFP3   | relaxin/insulin like family peptide receptor 3   | -0.599 |
| 281332166 | GPR158  | G protein-coupled receptor 158                   | -0.599 |
| 293347888 | SRBD1   | S1 RNA binding domain 1                          | -0.598 |
| 82654224  | IDNK    | IDNK, gluconokinase                              | -0.597 |
| 564387543 | UGGT2   | UDP-glucose glycoprotein glucosyltransferase 2   | -0.596 |
| 672013014 | N/A     | N/A                                              | -0.596 |
| 157817670 | SLC2A10 | solute carrier family 2 member 10                | -0.595 |
| 18677743  | FGF11   | fibroblast growth factor 11                      | -0.594 |
| 13162324  | MEPE    | matrix extracellular phosphoglycoprotein         | -0.593 |
| 6978737   | CYP1B1  | cytochrome P450 family 1 subfamily B member 1    | -0.593 |
| 655886694 | N/A     | N/A                                              | -0.592 |
| 354475081 | N/A     | N/A                                              | -0.591 |
| 28461161  | LDLR    | low density lipoprotein receptor                 | -0.591 |
| 672018103 | N/A     | N/A                                              | -0.590 |
| 108935976 | DISC1   | disrupted in schizophrenia 1                     | -0.590 |
| 537141843 | N/A     | N/A                                              | -0.589 |
| 21245102  | PLPP2   | phospholipid phosphatase 2                       | -0.589 |
| 567316103 | Ac1576  | uncharacterized LOC102552783                     | -0.587 |
| 157822207 | HOGA1   | 4-hydroxy-2-oxoglutarate aldolase 1              | -0.587 |
| 197927123 | LYRM7   | LYR motif containing 7                           | -0.587 |
| 589932011 | N/A     | N/A                                              | -0.586 |
| 201860292 | CA13    | carbonic anhydrase 13                            | -0.585 |
| 149063098 | LAT2    | linker for activation of T cells family member 2 | -0.585 |
| 189230091 | MIS18A  | MIS18 kinetochore protein A                      | -0.585 |
| 300793858 | PARP14  | poly(ADP-ribose) polymerase family member 14     | -0.585 |
| 56090245  | TCP11   | t-complex 11                                     | -0.585 |
| 568950242 | Pgap2   | post-GPI attachment to proteins 2                | -0.583 |
| 672086986 | SLC38A5 | solute carrier family 38 member 5                | -0.583 |
| 83320101  | AFG1L   | AFG1 like ATPase                                 | -0.583 |
| 564394999 | CLGN    | calmegin                                         | -0.582 |
| 83649764  | STYXL1  | serine/threonine/tyrosine interacting like 1     | -0.582 |
| 149057816 | N/A     | N/A                                              | -0.582 |
| 148692627 | N/A     | N/A                                              | -0.581 |
| 149051152 | N/A     | N/A                                              | -0.581 |
| 392339456 | CKAP2L  | cytoskeleton associated protein 2 like           | -0.579 |
| 470602254 | N/A     | N/A                                              | -0.578 |

|           |                             |                                                         |        |
|-----------|-----------------------------|---------------------------------------------------------|--------|
| 164519095 | SLC9A2                      | solute carrier family 9 member A2                       | -0.578 |
| 187282394 | USP43                       | ubiquitin specific peptidase 43                         | -0.577 |
| 564323143 | Gprasp2                     | G protein-coupled receptor associated sorting protein 2 | -0.576 |
| 157820485 | SLC9B2                      | solute carrier family 9 member B2                       | -0.576 |
| 564300485 | LOC102551095                | uncharacterized LOC102551095                            | -0.576 |
| 564333152 | N/A                         | N/A                                                     | -0.576 |
| 30027645  | GHR                         | growth hormone receptor                                 | -0.575 |
| 291463305 | SHISA9                      | shisa family member 9                                   | -0.574 |
| 16758560  | WIF1                        | WNT inhibitory factor 1                                 | -0.573 |
| 148690852 | FCGRT                       | Fc fragment of IgG receptor and transporter             | -0.573 |
| 672028919 | N/A                         | N/A                                                     | -0.573 |
| 293346999 | MBD4                        | methyl-CpG binding domain 4, DNA glycosylase            | -0.573 |
| 78486556  | C16orf58                    | chromosome 16 open reading frame 58                     | -0.572 |
| 564366772 | MGC116197 (includes others) | similar to RIKEN cDNA 1700001E04                        | -0.569 |
| 55741859  | XRCC4                       | X-ray repair cross complementing 4                      | -0.569 |
| 67846096  | MFSD3                       | major facilitator superfamily domain containing 3       | -0.568 |
| 157816941 | PLXDC1                      | plexin domain containing 1                              | -0.567 |
| 19173754  | TESK2                       | testis-specific kinase 2                                | -0.567 |
| 564390348 | Klhl3                       | kelch-like family member 3                              | -0.566 |
| 62078799  | QRSL1                       | glutaminyl-tRNA synthase (glutamine-hydrolyzing)-like 1 | -0.566 |
| 672053541 | N/A                         | N/A                                                     | -0.566 |
| 157817903 | Dcaf1211                    | DDB1 and CUL4 associated factor 12-like 1               | -0.565 |
| 281182643 | ALK                         | ALK receptor tyrosine kinase                            | -0.565 |
| 9845234   | ANXA2                       | annexin A2                                              | -0.565 |
| 149048141 | PMF1/PMF1-BGLAP             | polyamine modulated factor 1                            | -0.565 |
| 564303933 | TET3                        | tet methylcytosine dioxygenase 3                        | -0.565 |
| 62078887  | CLEC14A                     | C-type lectin domain containing 14A                     | -0.564 |
| 148691906 | N/A                         | N/A                                                     | -0.564 |
| 7549765   | HK2                         | hexokinase 2                                            | -0.563 |
| 61889110  | OSTF1                       | osteoclast stimulating factor 1                         | -0.563 |
| 120474989 | KRT1                        | keratin 1                                               | -0.563 |
| 672015205 | N/A                         | N/A                                                     | -0.563 |
| 114145407 | CNTNAP5                     | contactin associated protein like 5                     | -0.563 |
| 57012436  | Krt10                       | keratin 10                                              | -0.562 |

|           |          |                                                   |        |
|-----------|----------|---------------------------------------------------|--------|
| 8393469   | S1PR2    | sphingosine-1-phosphate receptor 2                | -0.561 |
| 78486570  | ARHGAP4  | Rho GTPase activating protein 4                   | -0.560 |
| 672051901 | N/A      | N/A                                               | -0.559 |
| 157821487 | ANKRD34B | ankyrin repeat domain 34B                         | -0.559 |
| 569009290 | TENM1    | teneurin transmembrane protein 1                  | -0.559 |
| 158508553 | HAVCR2   | hepatitis A virus cellular receptor 2             | -0.558 |
| 57114344  | UHRF1    | ubiquitin like with PHD and ring finger domains 1 | -0.558 |
| 187282036 | ZBTB42   | zinc finger and BTB domain containing 42          | -0.558 |
| 197313645 | SMTN     | smoothelin                                        | -0.558 |
| 564372698 | N/A      | N/A                                               | -0.557 |
| 21326477  | RIPK3    | receptor interacting serine/threonine kinase 3    | -0.557 |
| 472391630 | N/A      | N/A                                               | -0.557 |
| 75832150  | GALNT3   | polypeptide N-acetylgalactosaminyltransferase 3   | -0.557 |
| 564310904 | N/A      | N/A                                               | -0.556 |
| 213385268 | Gm10778  | predicted gene 10778                              | -0.554 |
| 213513304 | ATP10A   | ATPase phospholipid transporting 10A (putative)   | -0.554 |
| 300798350 | LRRK1    | leucine rich repeat kinase 1                      | -0.554 |
| 42476287  | TGM2     | transglutaminase 2                                | -0.553 |
| 16758788  | PTPN6    | protein tyrosine phosphatase, non-receptor type 6 | -0.552 |
| 199562000 | USP40    | ubiquitin specific peptidase 40                   | -0.552 |
| 293349510 | STAC     | SH3 and cysteine rich domain                      | -0.550 |
| 392331598 | MPV17L   | MPV17 mitochondrial inner membrane protein like   | -0.549 |
| 392331598 | MPV17L   | MPV17 mitochondrial inner membrane protein like   | -0.549 |
| 564378482 | MICALL2  | MICAL like 2                                      | -0.548 |
| 157820141 | KLHDC1   | kelch domain containing 1                         | -0.546 |
| 672023790 | N/A      | N/A                                               | -0.545 |
| 300795183 | SNTG1    | syntrophin gamma 1                                | -0.543 |
| 171846640 | FBLN1    | fibulin 1                                         | -0.543 |
| 188497675 | CXorf57  | chromosome X open reading frame 57                | -0.542 |
| 815891318 | ENTPD1   | ectonucleoside triphosphate diphosphohydrolase 1  | -0.541 |
| 75832132  | ESYT1    | extended synaptotagmin 1                          | -0.541 |
| 672080024 | N/A      | N/A                                               | -0.540 |
| 672066171 | GIN1     | gypsy retrotransposon integrase 1                 | -0.539 |

|           |                 |                                                                          |        |
|-----------|-----------------|--------------------------------------------------------------------------|--------|
| 6754808   | NDP             | NDP, norrin cystine knot growth factor                                   | -0.538 |
| 9507045   | RGS5            | regulator of G protein signaling 5                                       | -0.538 |
| 157823932 | FAM212A         | family with sequence similarity 212 member A                             | -0.538 |
| 564334233 | CFAP43          | cilia and flagella associated protein 43                                 | -0.537 |
| 11560101  | GCNT1           | glucosaminyl (N-acetyl) transferase 1, core 2                            | -0.537 |
| 672015368 | MAST4           | microtubule associated serine/threonine kinase family member 4           | -0.536 |
| 568972691 | STAT5B          | signal transducer and activator of transcription 5B                      | -0.535 |
| 16758390  | CLIC5           | chloride intracellular channel 5                                         | -0.535 |
| 115392004 | GPR17           | G protein-coupled receptor 17                                            | -0.535 |
| 564369844 | NEWGENE_1308624 | sialidase 4                                                              | -0.534 |
| 20302097  | PIGL            | phosphatidylinositol glycan anchor biosynthesis class L                  | -0.534 |
| 28461157  | CRYL1           | crystallin lambda 1                                                      | -0.534 |
| 148683700 | TMEM98          | transmembrane protein 98                                                 | -0.533 |
| 76096314  | DSC2            | desmocollin 2                                                            | -0.532 |
| 254675172 | AK7             | adenylate kinase 7                                                       | -0.531 |
| 569012000 | KLF8            | Kruppel like factor 8                                                    | -0.531 |
| 300794555 | TMC7            | transmembrane channel like 7                                             | -0.531 |
| 984102375 | N/A             | N/A                                                                      | -0.529 |
| 672051145 | PARP11          | poly(ADP-ribose) polymerase family member 11                             | -0.529 |
| 46310239  | SIDT1           | SID1 transmembrane family member 1                                       | -0.528 |
| 564319108 | ADGRA2          | adhesion G protein-coupled receptor A2                                   | -0.527 |
| 157822527 | Prorsd1         | prolyl-tRNA synthetase domain containing 1                               | -0.527 |
| 157818843 | EXTL1           | exostosin like glycosyltransferase 1                                     | -0.527 |
| 149067143 | N/A             | N/A                                                                      | -0.527 |
| 635047523 | N/A             | N/A                                                                      | -0.526 |
| 56090301  | NUDT5           | nudix hydrolase 5                                                        | -0.526 |
| 40018594  | POPDC2          | popeye domain containing 2                                               | -0.525 |
| 157820317 | STXBP4          | syntaxin binding protein 4                                               | -0.524 |
| 148747464 | SCD             | stearoyl-CoA desaturase                                                  | -0.524 |
| 19424232  | CSF2RB          | colony stimulating factor 2 receptor beta common subunit                 | -0.524 |
| 148678784 | PTH1H           | parathyroid hormone like hormone                                         | -0.523 |
| 157822879 | EFS             | embryonal Fyn-associated substrate                                       | -0.523 |
| 564350006 | PREX2           | phosphatidylinositol-3,4,5-trisphosphate dependent Rac exchange factor 2 | -0.523 |



|           |            |                                                                      |        |
|-----------|------------|----------------------------------------------------------------------|--------|
| 13929182  | VAMP8      | vesicle associated membrane protein 8                                | -0.522 |
| 672071899 | BHLHA15    | basic helix-loop-helix family member a15                             | -0.522 |
| 124244050 | PPIP5K1    | diphosphoinositol pentakisphosphate kinase 1                         | -0.522 |
| 16758130  | WNT4       | Wnt family member 4                                                  | -0.520 |
| 56676356  | SLC10A4    | solute carrier family 10 member 4                                    | -0.520 |
| 157822555 | RIN3       | Ras and Rab interactor 3                                             | -0.520 |
| 672063281 | PPM1M      | protein phosphatase, Mg <sup>2+</sup> /Mn <sup>2+</sup> dependent 1M | -0.519 |
| 568966731 | HMG20B     | high mobility group 20B                                              | -0.518 |
| 392340179 | RERG       | RAS like estrogen regulated growth inhibitor                         | -0.518 |
| 6981180   | MAOB       | monoamine oxidase B                                                  | -0.518 |
| 148692356 | ARHGEF1    | Rho guanine nucleotide exchange factor 1                             | -0.517 |
| 11067395  | Tcam1      | testicular cell adhesion molecule 1                                  | -0.516 |
| 293348472 | ZFR2       | zinc finger RNA binding protein 2                                    | -0.516 |
| 149037033 | PRDM5      | PR/SET domain 5                                                      | -0.516 |
| 157823277 | DYSF       | dysferlin                                                            | -0.515 |
| 759101041 | N/A        | N/A                                                                  | -0.515 |
| 61556921  | UBXN10     | UBX domain protein 10                                                | -0.515 |
| 392338379 | SLC26A8    | solute carrier family 26 member 8                                    | -0.514 |
| 237757336 | OLIG1      | oligodendrocyte transcription factor 1                               | -0.514 |
| 76159291  | CAST       | calpastatin                                                          | -0.514 |
| 149047863 | LOC690190  | hypothetical protein LOC690190                                       | -0.514 |
| 72255523  | DNALI1     | dynein axonemal light intermediate chain 1                           | -0.513 |
| 25282441  | DECR2      | 2,4-dienoyl-CoA reductase 2                                          | -0.513 |
| 157820973 | RAB32      | RAB32, member RAS oncogene family                                    | -0.512 |
| 157817684 | TRIM14     | tripartite motif containing 14                                       | -0.512 |
| 149029225 | N/A        | N/A                                                                  | -0.511 |
| 147900684 | TLR7       | toll like receptor 7                                                 | -0.511 |
| 62078773  | CCDC81     | coiled-coil domain containing 81                                     | -0.511 |
| 154937382 | MYL9       | myosin light chain 9                                                 | -0.510 |
| 308044487 | KIAA0319   | KIAA0319                                                             | -0.509 |
| 293355224 | Rps12-ps24 | ribosomal protein S12, pseudogene 24                                 | -0.509 |
| 47058976  | TYROBP     | TYRO protein tyrosine kinase binding protein                         | -0.508 |
| 293344916 | COL6A1     | collagen type VI alpha 1 chain                                       | -0.508 |
| 148698795 | GPX7       | glutathione peroxidase 7                                             | -0.507 |
| 312922352 | TTF2       | transcription termination factor 2                                   | -0.506 |
| 17105368  | KLF9       | Kruppel like factor 9                                                | -0.505 |
| 564399060 | PIGA       | phosphatidylinositol glycan anchor biosynthesis class A              | -0.505 |
| 62079187  | IQCG       | IQ motif containing G                                                | -0.504 |

|           |          |                                                      |        |
|-----------|----------|------------------------------------------------------|--------|
| 564355112 | EMILIN1  | elastin microfibril interfacier 1                    | -0.503 |
| 148692950 | CDHR1    | cadherin related family member 1                     | -0.503 |
| 157816963 | IRF4     | interferon regulatory factor 4                       | -0.503 |
| 880876474 | N/A      | N/A                                                  | -0.501 |
| 654824082 | Fbx121   | F-box and leucine-rich repeat protein 21             | -0.500 |
| 37693510  | Bst2     | bone marrow stromal cell antigen 2                   | -0.500 |
| 9506709   | GALR2    | galanin receptor 2                                   | -0.500 |
| 25742772  | KCNA2    | potassium voltage-gated channel subfamily A member 2 | -0.500 |
| 209529675 | TXLNB    | taxilin beta                                         | -0.498 |
| 58865396  | FIGNL1   | fidgetin like 1                                      | -0.497 |
| 50233928  | TMEM159  | transmembrane protein 159                            | -0.497 |
| 470631944 | N/A      | N/A                                                  | -0.497 |
| 158138532 | ATP7B    | ATPase copper transporting beta                      | -0.497 |
| 281371499 | COL5A2   | collagen type V alpha 2 chain                        | -0.495 |
| 73487332  | C1orf115 | chromosome 1 open reading frame 115                  | -0.495 |
| 16758444  | ST14     | suppression of tumorigenicity 14                     | -0.495 |
| 157822847 | PSMB11   | proteasome subunit beta 11                           | -0.495 |
| 157817292 | TPCN2    | two pore segment channel 2                           | -0.495 |
| 564330609 | SYT17    | synaptotagmin 17                                     | -0.494 |
| 84662732  | DNASE1L1 | deoxyribonuclease 1 like 1                           | -0.494 |
| 62078635  | CCDC153  | coiled-coil domain containing 153                    | -0.494 |
| 157822759 | PARP2    | poly(ADP-ribose) polymerase 2                        | -0.493 |
| 41386749  | PCLAF    | PCNA clamp associated factor                         | -0.492 |
| 399220341 | SLC2A13  | solute carrier family 2 member 13                    | -0.492 |
| 157819347 | CDC6     | cell division cycle 6                                | -0.492 |
| 145207953 | PLAU     | plasminogen activator, urokinase                     | -0.491 |
| 149045505 | TTPA     | alpha tocopherol transfer protein                    | -0.491 |
| 197385188 | CIART    | circadian associated repressor of transcription      | -0.491 |
| 913518709 | N/A      | N/A                                                  | -0.491 |
| 545208112 | N/A      | N/A                                                  | -0.491 |
| 51491896  | SPATA18  | spermatogenesis associated 18                        | -0.490 |
| 564301698 | LY75     | lymphocyte antigen 75                                | -0.489 |
| 40018602  | FGFRL1   | fibroblast growth factor receptor like 1             | -0.489 |
| 12738847  | MERTK    | MER proto-oncogene, tyrosine kinase                  | -0.488 |
| 58219539  | ENG      | endoglin                                             | -0.488 |
| 672080825 | N/A      | N/A                                                  | -0.488 |
| 558611343 | MCM3     | minichromosome maintenance complex component 3       | -0.488 |
| 157817033 | TJAP1    | tight junction associated protein 1                  | -0.487 |

|           |                                |                                                                     |        |
|-----------|--------------------------------|---------------------------------------------------------------------|--------|
| 6978867   | GABRB1                         | gamma-aminobutyric acid type A receptor beta1 subunit               | -0.487 |
| 27545428  | MAPK15                         | mitogen-activated protein kinase 15                                 | -0.487 |
| 672084625 | LOC100909409 (includes others) | RGD1562660                                                          | -0.487 |
| 7106349   | LYNX1                          | Ly6/neurotoxin 1                                                    | -0.487 |
| 112350    | N/A                            | N/A                                                                 | -0.486 |
| 293350806 | ZRSR2                          | zinc finger CCCH-type, RNA binding motif and serine/arginine rich 2 | -0.485 |
| 157821433 | CSF3R                          | colony stimulating factor 3 receptor                                | -0.485 |
| 157824113 | GPR84                          | G protein-coupled receptor 84                                       | -0.485 |
| 77020250  | PCSK9                          | proprotein convertase subtilisin/kexin type 9                       | -0.485 |
| 149058686 | PIGR                           | polymeric immunoglobulin receptor                                   | -0.485 |
| 149034989 | RADIL                          | Rap associating with DIL domain                                     | -0.485 |
| 281427229 | COL6A2                         | collagen type VI alpha 2 chain                                      | -0.485 |
| 157786894 | PYCR1                          | pyrroline-5-carboxylate reductase 1                                 | -0.485 |
| 13786160  | SLC22A8                        | solute carrier family 22 member 8                                   | -0.485 |
| 209954806 | PIGN                           | phosphatidylinositol glycan anchor biosynthesis class N             | -0.485 |
| 564399546 | STARD8                         | StAR related lipid transfer domain containing 8                     | -0.484 |
| 157951643 | ACTN2                          | actinin alpha 2                                                     | -0.484 |
| 625213993 | N/A                            | N/A                                                                 | -0.484 |
| 58865450  | BAG3                           | BCL2 associated athanogene 3                                        | -0.484 |
| 672066409 | N/A                            | N/A                                                                 | -0.483 |
| 164607119 | SUMF2                          | sulfatase modifying factor 2                                        | -0.483 |
| 392333084 | CC2D2A                         | coiled-coil and C2 domain containing 2A                             | -0.483 |
| 395759219 | AQP4                           | aquaporin 4                                                         | -0.482 |
| 157786612 | B9D1                           | B9 domain containing 1                                              | -0.482 |
| 109497496 | MMAB                           | methylmalonic aciduria (cobalamin deficiency) cblB type             | -0.482 |
| 13591971  | HNMT                           | histamine N-methyltransferase                                       | -0.481 |
| 16758322  | SYNGR2                         | synaptogyrin 2                                                      | -0.481 |
| 568968462 | REEP6                          | receptor accessory protein 6                                        | -0.481 |
| 537241732 | N/A                            | N/A                                                                 | -0.480 |
| 761631363 | EPGN                           | epithelial mitogen                                                  | -0.479 |
| 56090459  | CNDP1                          | carnosine dipeptidase 1                                             | -0.479 |
| 293340174 | DNAH9                          | dynein axonemal heavy chain 9                                       | -0.479 |
| 157073947 | C1orf74                        | chromosome 1 open reading frame 74                                  | -0.478 |
| 6978505   | ANXA5                          | annexin A5                                                          | -0.478 |
| 564306247 | PHACTR4                        | phosphatase and actin regulator 4                                   | -0.477 |

|           |          |                                                                                          |        |
|-----------|----------|------------------------------------------------------------------------------------------|--------|
| 189011606 | NCEH1    | neutral cholesterol ester hydrolase 1                                                    | -0.476 |
| 62078713  | ZNF385D  | zinc finger protein 385D                                                                 | -0.476 |
| 57528252  | QPRT     | quinolinate phosphoribosyltransferase                                                    | -0.475 |
| 392332443 | PRKDC    | protein kinase, DNA-activated, catalytic polypeptide                                     | -0.475 |
| 16923978  | SLC26A2  | solute carrier family 26 member 2                                                        | -0.474 |
| 916043983 | Baiap3   | BAI1-associated protein 3                                                                | -0.474 |
| 202070751 | RFTN1    | raftlin, lipid raft linker 1                                                             | -0.474 |
| 77917594  | ZFYVE19  | zinc finger FYVE-type containing 19                                                      | -0.473 |
| 148695091 | BBS5     | Bardet-Biedl syndrome 5                                                                  | -0.473 |
| 225007623 | TCFL5    | transcription factor like 5                                                              | -0.472 |
| 58865984  | TRAF3IP1 | TRAF3 interacting protein 1                                                              | -0.471 |
| 307078146 | UACA     | uveal autoantigen with coiled-coil domains and ankyrin repeats                           | -0.470 |
| 149032914 | MOXD1    | monooxygenase DBH like 1                                                                 | -0.469 |
| 312922379 | TNN      | tenascin N                                                                               | -0.469 |
| 157816939 | WASHC3   | WASH complex subunit 3                                                                   | -0.469 |
| 672034240 | N/A      | N/A                                                                                      | -0.469 |
| 114145710 | SEC61G   | Sec61 translocon gamma subunit                                                           | -0.469 |
| 157823399 | COG4     | component of oligomeric golgi complex 4                                                  | -0.468 |
| 589269168 | WDR34    | WD repeat domain 34                                                                      | -0.467 |
| 19924069  | SPON2    | spondin 2                                                                                | -0.467 |
| 219281893 | ZNF583   | zinc finger protein 583                                                                  | -0.467 |
| 75905809  | AKAP12   | A-kinase anchoring protein 12                                                            | -0.466 |
| 41056215  | XRCC5    | X-ray repair cross complementing 5                                                       | -0.466 |
| 157822891 | ADCK2    | aarF domain containing kinase 2                                                          | -0.465 |
| 564380929 | KCNT2    | potassium sodium-activated channel subfamily T member 2                                  | -0.465 |
| 71043706  | MUS81    | MUS81 structure-specific endonuclease subunit                                            | -0.465 |
| 672044191 | TBCK     | TBC1 domain containing kinase                                                            | -0.465 |
| 672055145 | N/A      | N/A                                                                                      | -0.465 |
| 58865618  | PAPOLB   | poly(A) polymerase beta                                                                  | -0.464 |
| 148356229 | CCND1    | cyclin D1                                                                                | -0.464 |
| 149031202 | Saysd1   | SAYSVFN motif domain containing 1                                                        | -0.464 |
| 564375796 | N/A      | N/A                                                                                      | -0.463 |
| 589965307 | N/A      | N/A                                                                                      | -0.463 |
| 56090632  | ATP5S    | ATP synthase, H <sup>+</sup> transporting, mitochondrial Fo complex subunit s (factor B) | -0.463 |
| 212549544 | C15orf39 | chromosome 15 open reading frame 39                                                      | -0.463 |
| 56605808  | CENPN    | centromere protein N                                                                     | -0.462 |

|           |           |                                                    |        |
|-----------|-----------|----------------------------------------------------|--------|
| 149053720 | CA4       | carbonic anhydrase 4                               | -0.461 |
| 148709823 | PCGF5     | polycomb group ring finger 5                       | -0.460 |
| 148710197 | Smim10l2a | small integral membrane protein 10 like 2A         | -0.459 |
| 148669431 | DNAJC27   | DnaJ heat shock protein family (Hsp40) member C27  | -0.459 |
| 672034901 | DNAAF3    | dynein axonemal assembly factor 3                  | -0.459 |
| 157823151 | DLEU7     | deleted in lymphocytic leukemia, 7                 | -0.459 |
| 68163403  | SLC46A3   | solute carrier family 46 member 3                  | -0.458 |
| 9506953   | PCOLCE    | procollagen C-endopeptidase enhancer               | -0.458 |
| 672084224 | CCDC113   | coiled-coil domain containing 113                  | -0.458 |
| 219275548 | DUSP19    | dual specificity phosphatase 19                    | -0.458 |
| 194440693 | Maml2     | mastermind like transcriptional coactivator 2      | -0.457 |
| 310703673 | GRIN3A    | glutamate ionotropic receptor NMDA type subunit 3A | -0.457 |
| 16758600  | RGS14     | regulator of G protein signaling 14                | -0.457 |
| 148699893 | COL6A1    | collagen type VI alpha 1 chain                     | -0.457 |
| 56090411  | POLE3     | DNA polymerase epsilon 3, accessory subunit        | -0.456 |
| 157821107 | MYO1F     | myosin IF                                          | -0.456 |
| 121722562 | CA9       | carbonic anhydrase 9                               | -0.455 |
| 564346692 | GIMAP8    | GTPase, IMAP family member 8                       | -0.455 |
| 149067372 | MTERF2    | mitochondrial transcription termination factor 2   | -0.455 |
| 157786618 | RANGRF    | RAN guanine nucleotide release factor              | -0.455 |
| 195976802 | DNLZ      | DNL-type zinc finger                               | -0.455 |
| 67078530  | CHAF1B    | chromatin assembly factor 1 subunit B              | -0.454 |
| 157817743 | CDH5      | cadherin 5                                         | -0.454 |
| 149028405 | EBP       | emopamil binding protein (sterol isomerase)        | -0.454 |
| 13562118  | LRP2      | LDL receptor related protein 2                     | -0.454 |
| 149048674 | PEX5L     | peroxisomal biogenesis factor 5 like               | -0.453 |
| 9437326   | SLC4A4    | solute carrier family 4 member 4                   | -0.453 |
| 13027400  | GUCY1A2   | guanylate cyclase 1 soluble subunit alpha 2        | -0.453 |
| 157819513 | ABCA4     | ATP binding cassette subfamily A member 4          | -0.453 |
| 167555114 | CCDC17    | coiled-coil domain containing 17                   | -0.453 |
| 157820241 | Marveld1  | MARVEL domain containing 1                         | -0.452 |
| 62945352  | C4orf19   | chromosome 4 open reading frame 19                 | -0.452 |
| 392341425 | PTPRB     | protein tyrosine phosphatase, receptor type B      | -0.452 |
| 768711606 | THBS3     | thrombospondin 3                                   | -0.452 |
| 158138494 | PTPRC     | protein tyrosine phosphatase, receptor type C      | -0.451 |
| 157817911 | C21orf62  | chromosome 21 open reading frame 62                | -0.451 |
| 725595815 | N/A       | N/A                                                | -0.451 |

|           |               |                                                            |        |
|-----------|---------------|------------------------------------------------------------|--------|
| 33414515  | PXK           | PX domain containing serine/threonine kinase like          | -0.450 |
| 58865380  | STAT2         | signal transducer and activator of transcription 2         | -0.450 |
| 568953371 | 4932443I19Rik | RIKEN cDNA 4932443I19 gene                                 | -0.450 |
| 40254754  | OCLN          | occludin                                                   | -0.450 |
| 293346302 | FBLN7         | fibulin 7                                                  | -0.448 |
| 635015168 | N/A           | N/A                                                        | -0.448 |
| 564349878 | KIAA1551      | KIAA1551                                                   | -0.447 |
| 8393807   | MYH7          | myosin heavy chain 7                                       | -0.447 |
| 149015786 | N/A           | N/A                                                        | -0.446 |
| 149026322 | PTGER3        | prostaglandin E receptor 3                                 | -0.445 |
| 201066407 | EAPP          | E2F associated phosphoprotein                              | -0.444 |
| 77993368  | ACSF2         | acyl-CoA synthetase family member 2                        | -0.444 |
| 51854227  | GSN           | gelsolin                                                   | -0.444 |
| 157073937 | PARP9         | poly(ADP-ribose) polymerase family member 9                | -0.443 |
| 48428501  | SYNPO         | synaptopodin                                               | -0.443 |
| 392331978 | CDR2L         | cerebellar degeneration related protein 2 like             | -0.442 |
| 157786756 | CDC45         | cell division cycle 45                                     | -0.442 |
| 27436863  | HACL1         | 2-hydroxyacyl-CoA lyase 1                                  | -0.441 |
| 16758186  | SLCO1C1       | solute carrier organic anion transporter family member 1C1 | -0.441 |
| 6978629   | CD38          | CD38 molecule                                              | -0.440 |
| 198386351 | TBC1D31       | TBC1 domain family member 31                               | -0.439 |
| 62078835  | TTL9          | tubulin tyrosine ligase like 9                             | -0.439 |
| 149058661 | RAB7B         | RAB7B, member RAS oncogene family                          | -0.439 |
| 77993356  | CDCA7L        | cell division cycle associated 7 like                      | -0.439 |
| 12831205  | EPAS1         | endothelial PAS domain protein 1                           | -0.438 |
| 71361639  | GLI4          | GLI family zinc finger 4                                   | -0.437 |
| 157823657 | SMAD6         | SMAD family member 6                                       | -0.437 |
| 149022245 | SCRN3         | secernin 3                                                 | -0.437 |
| 293344128 | ADAMTS17      | ADAM metalloproteinase with thrombospondin type 1 motif 17 | -0.437 |
| 68534547  | NUDT18        | nudix hydrolase 18                                         | -0.437 |
| 149028840 | N/A           | N/A                                                        | -0.436 |
| 149017515 | ALG12         | ALG12, alpha-1,6-mannosyltransferase                       | -0.436 |
| 123782692 | Cntnap5b      | contactin associated protein-like 5B                       | -0.436 |
| 8393057   | SERPINH1      | serpin family H member 1                                   | -0.436 |
| 148686921 | SLC24A4       | solute carrier family 24 member 4                          | -0.435 |
| 755499410 | CCM2L         | CCM2 like scaffolding protein                              | -0.435 |

|           |                    |                                                                      |        |
|-----------|--------------------|----------------------------------------------------------------------|--------|
| 68341937  | ZNF365             | zinc finger protein 365                                              | -0.435 |
| 201066363 | LOXL2              | lysyl oxidase like 2                                                 | -0.435 |
| 564332022 | N/A                | N/A                                                                  | -0.435 |
| 404312655 | SDR42E1            | short chain dehydrogenase/reductase family 42E, member 1             | -0.435 |
| 564394961 | N/A                | N/A                                                                  | -0.434 |
| 469663646 | NDUFA13            | NADH:ubiquinone oxidoreductase subunit A13                           | -0.433 |
| 172045714 | MIIP               | migration and invasion inhibitory protein                            | -0.433 |
| 61889119  | TNFSF12            | TNF superfamily member 12                                            | -0.432 |
| 210031518 | MOGAT2             | monoacylglycerol O-acyltransferase 2                                 | -0.432 |
| 56605988  | FANK1              | fibronectin type III and ankyrin repeat domains 1                    | -0.431 |
| 157822677 | LGI3               | leucine rich repeat LGI family member 3                              | -0.431 |
| 11560087  | PYGL               | glycogen phosphorylase L                                             | -0.431 |
| 537191633 | N/A                | N/A                                                                  | -0.431 |
| 148673911 | Gm21596/Hmgb1      | high mobility group box 1                                            | -0.430 |
| 110347493 | PCDHA9             | protocadherin alpha 9                                                | -0.429 |
| 157787135 | DUSP10             | dual specificity phosphatase 10                                      | -0.428 |
| 187937018 | ITPRIPL2           | ITPRIP like 2                                                        | -0.428 |
| 564400410 | AMOT               | angiomin                                                             | -0.428 |
| 157822319 | EVC2               | EvC ciliary complex subunit 2                                        | -0.428 |
| 157786874 | Fmn1               | formin-like 1                                                        | -0.427 |
| 403225005 | Col6a4             | collagen, type VI, alpha 4                                           | -0.426 |
| 537170289 | N/A                | N/A                                                                  | -0.426 |
| 13928796  | PXMP2              | peroxisomal membrane protein 2                                       | -0.426 |
| 672089660 | ZNF280B            | zinc finger protein 280B                                             | -0.426 |
| 149038013 | SLC9A5             | solute carrier family 9 member A5                                    | -0.426 |
| 157821557 | CD248              | CD248 molecule                                                       | -0.426 |
| 157823913 | ARHGAP10           | Rho GTPase activating protein 10                                     | -0.425 |
| 38454282  | ETFBKMT            | electron transfer flavoprotein beta subunit lysine methyltransferase | -0.424 |
| 157823259 | TMEM229A           | transmembrane protein 229A                                           | -0.424 |
| 76443683  | LOC100912042/Surf2 | surfeit 2                                                            | -0.423 |
| 149061527 | PGGHG              | protein-glucosylgalactosylhydroxylysine glucosidase                  | -0.423 |
| 300796997 | ARHGAP28           | Rho GTPase activating protein 28                                     | -0.423 |
| 672023090 | N/A                | N/A                                                                  | -0.423 |
| 31745146  | TBX3               | T-box 3                                                              | -0.423 |
| 1346731   | HAPLN1             | hyaluronan and proteoglycan link protein 1                           | -0.423 |

|           |            |                                                    |        |
|-----------|------------|----------------------------------------------------|--------|
| 300797330 | PTPRU      | protein tyrosine phosphatase, receptor type U      | -0.422 |
| 210032365 | HSP90B1    | heat shock protein 90 beta family member 1         | -0.421 |
| 56090564  | GALM       | galactose mutarotase                               | -0.420 |
| 672032219 | REPS2      | RALBP1 associated Eps domain containing 2          | -0.420 |
| 62078447  | HBA1/HBA2  | hemoglobin subunit alpha 2                         | -0.420 |
| 293344558 | PCNX3      | pecanex homolog 3                                  | -0.420 |
| 58743349  | FAM89A     | family with sequence similarity 89 member A        | -0.419 |
| 157823313 | KANK3      | KN motif and ankyrin repeat domains 3              | -0.419 |
| 564352140 | PODN       | podocan                                            | -0.419 |
| 149037644 | N/A        | N/A                                                | -0.418 |
| 157823279 | CGNL1      | cingulin like 1                                    | -0.418 |
| 149057830 | Hgsnat     | heparan-alpha-glucosaminide N-acetyltransferase    | -0.418 |
| 74218228  | HNRNPC     | heterogeneous nuclear ribonucleoprotein C (C1/C2)  | -0.418 |
| 672077137 | N/A        | N/A                                                | -0.417 |
| 564329859 | COA4       | cytochrome c oxidase assembly factor 4 homolog     | -0.417 |
| 149035030 | MAFK       | MAF bZIP transcription factor K                    | -0.417 |
| 83642834  | NAGK       | N-acetylglucosamine kinase                         | -0.416 |
| 13994179  | SLC24A2    | solute carrier family 24 member 2                  | -0.416 |
| 564342737 | DTWD1      | DTW domain containing 1                            | -0.416 |
| 62078539  | Pagr1      | Paxip1-associated glutamate-rich protein 1         | -0.415 |
| 537268521 | N/A        | N/A                                                | -0.415 |
| 349585066 | C10orf90   | chromosome 10 open reading frame 90                | -0.415 |
| 76563944  | CLCF1      | cardiotrophin like cytokine factor 1               | -0.415 |
| 748983333 | PATJ       | PATJ, crumbs cell polarity complex component       | -0.415 |
| 6981562   | SLC9A3     | solute carrier family 9 member A3                  | -0.415 |
| 149054795 | RGD1309310 | similar to mKIAA0195 protein                       | -0.415 |
| 564367529 | ENPP4      | ectonucleotide pyrophosphatase/phosphodiesterase 4 | -0.414 |
| 62945312  | CXCL16     | C-X-C motif chemokine ligand 16                    | -0.414 |
| 568916013 | N/A        | N/A                                                | -0.414 |
| 194473652 | TTC38      | tetratricopeptide repeat domain 38                 | -0.413 |
| 157819765 | OGDHL      | oxoglutarate dehydrogenase like                    | -0.413 |
| 50811823  | NENF       | neudesin neurotrophic factor                       | -0.413 |
| 68342019  | LRRC17     | leucine rich repeat containing 17                  | -0.413 |
| 672041704 | NIPBL      | NIPBL, cohesin loading factor                      | -0.412 |
| 672041704 | NIPBL      | NIPBL, cohesin loading factor                      | -0.412 |
| 187469604 | EPS8L2     | EPS8 like 2                                        | -0.412 |



|           |          |                                                                     |        |
|-----------|----------|---------------------------------------------------------------------|--------|
| 672085293 | FANCA    | Fanconi anemia complementation group A                              | -0.412 |
| 312596884 | SLC31A2  | solute carrier family 31 member 2                                   | -0.411 |
| 73746573  | TGFB1I1  | transforming growth factor beta 1 induced transcript 1              | -0.411 |
| 9506405   | ARPC1B   | actin related protein 2/3 complex subunit 1B                        | -0.410 |
| 71043794  | CEP41    | centrosomal protein 41                                              | -0.410 |
| 157822913 | LHFPL2   | LHFPL tetraspan subfamily member 2                                  | -0.410 |
| 13591949  | GATM     | glycine amidinotransferase                                          | -0.409 |
| 23463307  | RIOX2    | ribosomal oxygenase 2                                               | -0.409 |
| 672061813 | ACSBG1   | acyl-CoA synthetase bubblegum family member 1                       | -0.409 |
| 78126167  | SLC1A2   | solute carrier family 1 member 2                                    | -0.408 |
| 672023055 | TLN2     | talin 2                                                             | -0.408 |
| 157786690 | PRKCA    | protein kinase C alpha                                              | -0.408 |
| 148697062 | TMEM255A | transmembrane protein 255A                                          | -0.408 |
| 109480433 | GNPTAB   | N-acetylglucosamine-1-phosphate transferase alpha and beta subunits | -0.407 |
| 564351356 | PAPPA    | pappalysin 1                                                        | -0.407 |
| 157819227 | PRPF31   | pre-mRNA processing factor 31                                       | -0.407 |
| 58865490  | LCMT2    | leucine carboxyl methyltransferase 2                                | -0.407 |
| 198278450 | CPT1C    | carnitine palmitoyltransferase 1C                                   | -0.406 |
| 46402488  | NOS3     | nitric oxide synthase 3                                             | -0.405 |
| 157821089 | PEX10    | peroxisomal biogenesis factor 10                                    | -0.405 |
| 392353178 | SEL1L3   | SEL1L family member 3                                               | -0.405 |
| 7949020   | CDK2     | cyclin dependent kinase 2                                           | -0.405 |
| 880939564 | N/A      | N/A                                                                 | -0.405 |
| 187281569 | CFAP52   | cilia and flagella associated protein 52                            | -0.405 |
| 157821021 | ZC3H6    | zinc finger CCCH-type containing 6                                  | -0.405 |
| 13162347  | FDXR     | ferredoxin reductase                                                | -0.405 |
| 358030320 | DMTN     | dematin actin binding protein                                       | -0.404 |
| 672070295 | BAHCC1   | BAH domain and coiled-coil containing 1                             | -0.404 |
| 118763791 | REXO5    | RNA exonuclease 5                                                   | -0.404 |
| 6981664   | TNFRSF1A | TNF receptor superfamily member 1A                                  | -0.403 |
| 149049048 | RECQL    | RecQ like helicase                                                  | -0.403 |
| 127140886 | EML6     | echinoderm microtubule associated protein like 6                    | -0.403 |
| 195973006 | EGFLAM   | EGF like, fibronectin type III and laminin G domains                | -0.403 |
| 157786694 | CAVIN1   | caveolae associated protein 1                                       | -0.403 |
| 62079139  | C11orf54 | chromosome 11 open reading frame 54                                 | -0.403 |

|           |          |                                                          |        |
|-----------|----------|----------------------------------------------------------|--------|
| 122065191 | ABAT     | 4-aminobutyrate aminotransferase                         | -0.401 |
| 58865466  | SLC37A1  | solute carrier family 37 member 1                        | -0.401 |
| 61889088  | CYP2J2   | cytochrome P450 family 2 subfamily J member 2            | -0.401 |
| 188536090 | FAM241B  | family with sequence similarity 241 member B             | -0.400 |
| 149024348 | RAP1GAP  | RAP1 GTPase activating protein                           | -0.400 |
| 157819163 | SYPL2    | synaptophysin like 2                                     | -0.400 |
| 148701235 | TIGD3    | tigger transposable element derived 3                    | -0.400 |
| 77695926  | STAT1    | signal transducer and activator of transcription 1       | -0.399 |
| 9507041   | RESP18   | regulated endocrine specific protein 18                  | -0.399 |
| 28212252  | TPSG1    | tryptase gamma 1                                         | -0.399 |
| 56605714  | NDUFAF7  | NADH:ubiquinone oxidoreductase complex assembly factor 7 | -0.399 |
| 51571903  | C6orf47  | chromosome 6 open reading frame 47                       | -0.398 |
| 149041576 | REXO2    | RNA exonuclease 2                                        | -0.398 |
| 253683447 | ETV1     | ETS variant 1                                            | -0.398 |
| 62078719  | HAUS4    | HAUS augmin like complex subunit 4                       | -0.397 |
| 148666792 | ARHGAP25 | Rho GTPase activating protein 25                         | -0.396 |
| 312836782 | MRPS27   | mitochondrial ribosomal protein S27                      | -0.395 |
| 13591981  | LSS      | lanosterol synthase                                      | -0.394 |
| 28972652  | SLC12A5  | solute carrier family 12 member 5                        | -0.394 |
| 755494737 | N/A      | N/A                                                      | -0.394 |
| 157819229 | RPA3     | replication protein A3                                   | -0.393 |
| 78187977  | TCF19    | transcription factor 19                                  | -0.393 |
| 564371892 | N/A      | N/A                                                      | -0.393 |
| 817259544 | N/A      | N/A                                                      | -0.392 |
| 77917572  | LIPA     | lipase A, lysosomal acid type                            | -0.392 |
| 11177892  | KCNT1    | potassium sodium-activated channel subfamily T member 1  | -0.392 |
| 56605634  | EMC9     | ER membrane protein complex subunit 9                    | -0.392 |
| 149052857 | KCNJ12   | potassium voltage-gated channel subfamily J member 12    | -0.392 |
| 57528326  | MTFMT    | mitochondrial methionyl-tRNA formyltransferase           | -0.391 |
| 157820327 | THSD1    | thrombospondin type 1 domain containing 1                | -0.391 |
| 110347559 | PCDHA13  | protocadherin alpha 13                                   | -0.391 |
| 77628031  | SP110    | SP110 nuclear body protein                               | -0.391 |
| 564342244 | NUTM1    | NUT midline carcinoma family member 1                    | -0.390 |

|           |                         |                                                        |        |
|-----------|-------------------------|--------------------------------------------------------|--------|
| 8394209   | Rpl29 (includes others) | ribosomal protein L29                                  | -0.389 |
| 157824150 | PTPN22                  | protein tyrosine phosphatase, non-receptor type 22     | -0.389 |
| 187937124 | TMEM126B                | transmembrane protein 126B                             | -0.389 |
| 124286858 | B230217C12Rik           | RIKEN cDNA B230217C12 gene                             | -0.389 |
| 58865650  | LIAS                    | lipoic acid synthetase                                 | -0.388 |
| 564375702 | N/A                     | N/A                                                    | -0.388 |
| 164663795 | KCNB2                   | potassium voltage-gated channel subfamily B member 2   | -0.388 |
| 51948488  | SIRT5                   | sirtuin 5                                              | -0.388 |
| 296040479 | TXNRD3                  | thioredoxin reductase 3                                | -0.387 |
| 157823193 | LOXL3                   | lysyl oxidase like 3                                   | -0.387 |
| 149046383 | Lman2l                  | lectin, mannose-binding 2-like                         | -0.387 |
| 16758268  | TEKT1                   | tektin 1                                               | -0.386 |
| 260271475 | CCHCR1                  | coiled-coil alpha-helical rod protein 1                | -0.386 |
| 672080705 | TMCO3                   | transmembrane and coiled-coil domains 3                | -0.386 |
| 120586985 | APEX2                   | apurinic/apyrimidinic endodeoxyribonuclease 2          | -0.385 |
| 166999225 | GRM1                    | glutamate metabotropic receptor 1                      | -0.385 |
| 71043764  | C20orf27                | chromosome 20 open reading frame 27                    | -0.384 |
| 158081747 | PDGFB                   | platelet derived growth factor subunit B               | -0.384 |
| 569000267 | MDC1                    | mediator of DNA damage checkpoint 1                    | -0.384 |
| 157786698 | RDM1                    | RAD52 motif containing 1                               | -0.383 |
| 157820337 | GGCT                    | gamma-glutamylcyclotransferase                         | -0.383 |
| 6981210   | MME                     | membrane metalloendopeptidase                          | -0.382 |
| 149057193 | N/A                     | N/A                                                    | -0.382 |
| 149034469 | GNG7                    | G protein subunit gamma 7                              | -0.381 |
| 148690851 | RCN3                    | reticulocalbin 3                                       | -0.381 |
| 564305413 | E130308A19Rik           | RIKEN cDNA E130308A19 gene                             | -0.381 |
| 149036529 | DGUOK                   | deoxyguanosine kinase                                  | -0.381 |
| 19924041  | Cyp2d22                 | cytochrome P450, family 2, subfamily d, polypeptide 22 | -0.381 |
| 197387452 | UVSSA                   | UV stimulated scaffold protein A                       | -0.380 |
| 114052238 | FIG4                    | FIG4 phosphoinositide 5-phosphatase                    | -0.380 |
| 40786487  | GPR108                  | G protein-coupled receptor 108                         | -0.379 |
| 67078420  | PRIM2                   | DNA primase subunit 2                                  | -0.379 |
| 71043890  | SMPDL3B                 | sphingomyelin phosphodiesterase acid like 3B           | -0.379 |
| 157822957 | GPATCH11                | G-patch domain containing 11                           | -0.378 |
| 672083001 | N/A                     | N/A                                                    | -0.378 |
| 18426846  | DCBLD2                  | discoidin, CUB and LCCL domain containing 2            | -0.378 |

|           |                             |                                                             |        |
|-----------|-----------------------------|-------------------------------------------------------------|--------|
| 672063869 | MGC116197 (includes others) | similar to RIKEN cDNA 1700001E04                            | -0.378 |
| 157823299 | CSGALNACT1                  | chondroitin sulfate N-acetylgalactosaminyltransferase 1     | -0.378 |
| 564370911 | CHTF18                      | chromosome transmission fidelity factor 18                  | -0.378 |
| 672026317 | N/A                         | N/A                                                         | -0.377 |
| 157817249 | CDC14B                      | cell division cycle 14B                                     | -0.377 |
| 209447117 | NAA10                       | N(alpha)-acetyltransferase 10, NatA catalytic subunit       | -0.376 |
| 568974348 | KIF19                       | kinesin family member 19                                    | -0.376 |
| 149058556 | LGR6                        | leucine rich repeat containing G protein-coupled receptor 6 | -0.376 |
| 672037039 | TTC23                       | tetratricopeptide repeat domain 23                          | -0.375 |
| 205235    | Slc6a7                      | solute carrier family 6 member 7                            | -0.375 |
| 157819009 | PHF19                       | PHD finger protein 19                                       | -0.375 |
| 537252133 | N/A                         | N/A                                                         | -0.375 |
| 162287337 | APOE                        | apolipoprotein E                                            | -0.375 |
| 25282445  | ENTPD2                      | ectonucleoside triphosphate diphosphohydrolase 2            | -0.375 |
| 157822743 | KIF20A                      | kinesin family member 20A                                   | -0.374 |
| 219282679 | ZNF43                       | zinc finger protein 43                                      | -0.374 |
| 672083553 | SLC14A1                     | solute carrier family 14 member 1 (Kidd blood group)        | -0.373 |
| 189011677 | GLB1L                       | galactosidase beta 1 like                                   | -0.373 |
| 157823373 | TRHDE                       | thyrotropin releasing hormone degrading enzyme              | -0.373 |
| 149042939 | WFDC2                       | WAP four-disulfide core domain 2                            | -0.373 |
| 16758778  | EFNA5                       | ephrin A5                                                   | -0.372 |
| 929981595 | NPHP1                       | nephrocystin 1                                              | -0.372 |
| 157824002 | ATG10                       | autophagy related 10                                        | -0.372 |
| 158631254 | MSH4                        | mutS homolog 4                                              | -0.372 |
| 83320092  | PRTG                        | protogenin                                                  | -0.372 |
| 154090999 | NOXA1                       | NADPH oxidase activator 1                                   | -0.372 |
| 257900470 | B3GALT4                     | beta-1,3-galactosyltransferase 4                            | -0.372 |
| 564299653 | FAM169A                     | family with sequence similarity 169 member A                | -0.372 |
| 113061    | CHRNA3                      | cholinergic receptor nicotinic alpha 3 subunit              | -0.372 |
| 672055092 | N/A                         | N/A                                                         | -0.372 |
| 672076077 | N/A                         | N/A                                                         | -0.371 |
| 8393919   | LOC100911216/Pcsk1          | proprotein convertase subtilisin/kexin type 1               | -0.371 |

|           |           |                                                               |        |
|-----------|-----------|---------------------------------------------------------------|--------|
| 958805663 | N/A       | N/A                                                           | -0.371 |
| 672087893 | Dmrtd1b   | DMRT-like family C1b                                          | -0.371 |
| 392337475 | SIX5      | SIX homeobox 5                                                | -0.371 |
| 987938912 | N/A       | N/A                                                           | -0.370 |
| 198386343 | TRPS1     | transcriptional repressor GATA binding 1                      | -0.370 |
| 672039093 | N/A       | N/A                                                           | -0.370 |
| 8393861   | HPCAL4    | hippocalcin like 4                                            | -0.370 |
| 53850644  | FAM151A   | family with sequence similarity 151 member A                  | -0.369 |
| 568970276 | SH3PXD2B  | SH3 and PX domains 2B                                         | -0.369 |
| 568970276 | SH3PXD2B  | SH3 and PX domains 2B                                         | -0.369 |
| 157820213 | PERP      | PERP, TP53 apoptosis effector                                 | -0.369 |
| 157819959 | PCDHB2    | protocadherin beta 2                                          | -0.369 |
| 158303308 | PCCA      | propionyl-CoA carboxylase alpha subunit                       | -0.369 |
| 884874427 | N/A       | N/A                                                           | -0.368 |
| 157819753 | RCN1      | reticulocalbin 1                                              | -0.368 |
| 9247217   | MSX1      | msh homeobox 1                                                | -0.368 |
| 564343748 | CDK5RAP1  | CDK5 regulatory subunit associated protein 1                  | -0.368 |
| 148677309 | CMC1      | C-X9-C motif containing 1                                     | -0.367 |
| 53734563  | ACCS      | 1-aminocyclopropane-1-carboxylate synthase homolog (inactive) | -0.367 |
| 157824128 | SOX17     | SRY-box 17                                                    | -0.367 |
| 675781130 | N/A       | N/A                                                           | -0.367 |
| 672028474 | CDH24     | cadherin 24                                                   | -0.367 |
| 54019428  | PCDHA5    | protocadherin alpha 5                                         | -0.366 |
| 157822461 | C20orf194 | chromosome 20 open reading frame 194                          | -0.366 |
| 26024221  | PRSS12    | protease, serine 12                                           | -0.366 |
| 697012013 | N/A       | N/A                                                           | -0.366 |
| 564357619 | ITGB8     | integrin subunit beta 8                                       | -0.366 |
| 189011681 | C17orf49  | chromosome 17 open reading frame 49                           | -0.366 |
| 158534064 | RET       | ret proto-oncogene                                            | -0.365 |
| 564365550 | GMPPB     | GDP-mannose pyrophosphorylase B                               | -0.365 |
| 213512607 | CLYBL     | citrate lyase beta like                                       | -0.365 |
| 820994385 | N/A       | N/A                                                           | -0.365 |
| 157818983 | SIRT7     | sirtuin 7                                                     | -0.364 |
| 149054665 | ABCA9     | ATP binding cassette subfamily A member 9                     | -0.364 |
| 157817598 | INVS      | inversin                                                      | -0.364 |
| 66730351  | C11orf16  | chromosome 11 open reading frame 16                           | -0.364 |
| 294979146 | TCTN1     | tectonic family member 1                                      | -0.363 |
| 672057384 | N/A       | N/A                                                           | -0.363 |
| 6978761   | DGKG      | diacylglycerol kinase gamma                                   | -0.362 |

|           |           |                                                   |        |
|-----------|-----------|---------------------------------------------------|--------|
| 219278723 | ZNF23     | zinc finger protein 23                            | -0.362 |
| 16758712  | PDIA4     | protein disulfide isomerase family A member 4     | -0.362 |
| 281604225 | PUS7      | pseudouridylate synthase 7 (putative)             | -0.362 |
| 398650618 | MMP11     | matrix metalloproteinase 11                       | -0.361 |
| 157820695 | MRPL57    | mitochondrial ribosomal protein L57               | -0.360 |
| 61556907  | GALT      | galactose-1-phosphate uridylyltransferase         | -0.360 |
| 55741549  | MRPL13    | mitochondrial ribosomal protein L13               | -0.360 |
| 157820839 | Dnajb3    | DnaJ heat shock protein family (Hsp40) member B3  | -0.360 |
| 29293811  | SERPINF1  | serpin family F member 1                          | -0.359 |
| 296470851 | PABPC1L2A | poly(A) binding protein cytoplasmic 1 like 2A     | -0.359 |
| 392337574 | N/A       | N/A                                               | -0.358 |
| 40786491  | CYP20A1   | cytochrome P450 family 20 subfamily A member 1    | -0.358 |
| 58865802  | SPAG1     | sperm associated antigen 1                        | -0.357 |
| 149020543 | C19orf66  | chromosome 19 open reading frame 66               | -0.357 |
| 25453410  | CACNA1B   | calcium voltage-gated channel subunit alpha 1 B   | -0.357 |
| 149066868 | MDM1      | Mdm1 nuclear protein                              | -0.357 |
| 672072376 | N/A       | N/A                                               | -0.357 |
| 672086023 | HSF2BP    | heat shock transcription factor 2 binding protein | -0.357 |
| 672051732 | N/A       | N/A                                               | -0.356 |
| 215272398 | HIP1      | huntingtin interacting protein 1                  | -0.356 |
| 384368019 | Snhg11    | small nucleolar RNA host gene 11                  | -0.356 |
| 149065269 | N/A       | N/A                                               | -0.355 |
| 157822187 | WWOX      | WW domain containing oxidoreductase               | -0.355 |
| 310772247 | VWA3A     | von Willebrand factor A domain containing 3A      | -0.355 |
| 78042613  | NICN1     | nicotin 1                                         | -0.354 |
| 348041395 | DLGAP2    | DLG associated protein 2                          | -0.354 |
| 564361507 | CRELD2    | cysteine rich with EGF like domains 2             | -0.354 |
| 568918806 | TP53RK    | TP53 regulating kinase                            | -0.354 |
| 672052705 | FRRS1L    | ferric chelate reductase 1 like                   | -0.354 |
| 11693172  | CALR      | calreticulin                                      | -0.354 |
| 568945717 | HSPB6     | heat shock protein family B (small) member 6      | -0.352 |
| 507532705 | N/A       | N/A                                               | -0.352 |
| 594191048 | C19orf54  | chromosome 19 open reading frame 54               | -0.352 |
| 564331077 | HIRIP3    | HIRA interacting protein 3                        | -0.352 |
| 31077108  | GLDN      | gliomedin                                         | -0.351 |
| 61557118  | PCGF6     | polycomb group ring finger 6                      | -0.351 |
| 157823944 | SUSD2     | sushi domain containing 2                         | -0.351 |

|           |          |                                                                                                           |        |
|-----------|----------|-----------------------------------------------------------------------------------------------------------|--------|
| 16758024  | SYT9     | synaptotagmin 9                                                                                           | -0.351 |
| 149060100 | AIFM1    | apoptosis inducing factor mitochondria associated 1                                                       | -0.351 |
| 209862829 | SEMA3E   | semaphorin 3E                                                                                             | -0.350 |
| 149039154 | COQ4     | coenzyme Q4                                                                                               | -0.350 |
| 224420    | N/A      | N/A                                                                                                       | -0.350 |
| 939319594 | CPNE7    | copine 7                                                                                                  | -0.350 |
| 26006275  | ABCB9    | ATP binding cassette subfamily B member 9                                                                 | -0.350 |
| 149023022 | Oip5     | Opa interacting protein 5                                                                                 | -0.350 |
| 56605656  | DONSON   | downstream neighbor of SON                                                                                | -0.350 |
| 149053793 | TSPOAP1  | TSPO associated protein 1                                                                                 | -0.349 |
| 16758418  | C5AR1    | complement C5a receptor 1                                                                                 | -0.349 |
| 148747194 | SLC16A7  | solute carrier family 16 member 7                                                                         | -0.349 |
| 451172073 | CHRM3    | cholinergic receptor muscarinic 3                                                                         | -0.349 |
| 158749582 | MST1R    | macrophage stimulating 1 receptor                                                                         | -0.349 |
| 148702120 | ETV4     | ETS variant 4                                                                                             | -0.348 |
| 149058577 | Ppfia4   | protein tyrosine phosphatase, receptor type, f polypeptide (PTPRF), interacting protein (liprin), alpha 4 | -0.348 |
| 149048968 | ITPR2    | inositol 1,4,5-trisphosphate receptor type 2                                                              | -0.348 |
| 31088854  | HPS6     | HPS6, biogenesis of lysosomal organelles complex 2 subunit 3                                              | -0.347 |
| 564329392 | FLNA     | filamin A                                                                                                 | -0.347 |
| 984104888 | N/A      | N/A                                                                                                       | -0.347 |
| 62078697  | NPL      | N-acetylneuraminate pyruvate lyase                                                                        | -0.347 |
| 374253863 | CPNE2    | copine 2                                                                                                  | -0.347 |
| 564312446 | LMF1     | lipase maturation factor 1                                                                                | -0.347 |
| 537137169 | N/A      | N/A                                                                                                       | -0.346 |
| 2735334   | PDPN     | podoplanin                                                                                                | -0.345 |
| 55741540  | KATNAL1  | katanin catalytic subunit A1 like 1                                                                       | -0.345 |
| 568956384 | ADAMTS18 | ADAM metalloproteinase with thrombospondin type 1 motif 18                                                | -0.345 |
| 564332376 | RASGRP2  | RAS guanyl releasing protein 2                                                                            | -0.345 |
| 157819433 | MAP6D1   | MAP6 domain containing 1                                                                                  | -0.344 |
| 955478861 | N/A      | N/A                                                                                                       | -0.344 |
| 672015093 | VWA2     | von Willebrand factor A domain containing 2                                                               | -0.344 |
| 56119120  | SNF8     | SNF8, ESCRT-II complex subunit                                                                            | -0.343 |
| 62078847  | TSEN2    | tRNA splicing endonuclease subunit 2                                                                      | -0.343 |
| 16758580  | AURKB    | aurora kinase B                                                                                           | -0.343 |
| 6981018   | HCRTR1   | hypocretin receptor 1                                                                                     | -0.343 |

|           |                  |                                                              |        |
|-----------|------------------|--------------------------------------------------------------|--------|
| 157817498 | GLDC             | glycine decarboxylase                                        | -0.343 |
| 50511312  | POFUT1           | protein O-fucosyltransferase 1                               | -0.343 |
| 14269568  | LXN              | latexin                                                      | -0.343 |
| 300795140 | TAF1             | TATA-box binding protein associated factor 1                 | -0.342 |
| 11024664  | LTBP1            | latent transforming growth factor beta binding protein 1     | -0.342 |
| 81158091  | PCDHGA9          | protocadherin gamma subfamily A, 9                           | -0.342 |
| 77157795  | MAL2             | mal, T cell differentiation protein 2 (gene/pseudogene)      | -0.342 |
| 58219522  | SLC25A29         | solute carrier family 25 member 29                           | -0.342 |
| 564374356 | ADAM11           | ADAM metallopeptidase domain 11                              | -0.341 |
| 815891312 | CACNA1G          | calcium voltage-gated channel subunit alpha1 G               | -0.340 |
| 160333093 | TPRG1L           | tumor protein p63 regulated 1 like                           | -0.340 |
| 56605758  | THAP1            | THAP domain containing 1                                     | -0.340 |
| 672052684 | N/A              | N/A                                                          | -0.340 |
| 62078469  | RSPH10B/RSPH10B2 | radial spoke head 10 homolog B                               | -0.340 |
| 149027325 | DNAJC21          | DnaJ heat shock protein family (Hsp40) member C21            | -0.339 |
| 157820807 | GCDH             | glutaryl-CoA dehydrogenase                                   | -0.339 |
| 11693162  | INSIG1           | insulin induced gene 1                                       | -0.339 |
| 56605710  | LTBR             | lymphotoxin beta receptor                                    | -0.338 |
| 60360648  | KLHL2            | kelch like family member 2                                   | -0.338 |
| 162135927 | DCLRE1C          | DNA cross-link repair 1C                                     | -0.338 |
| 300795679 | CD84             | CD84 molecule                                                | -0.338 |
| 672084347 | N/A              | N/A                                                          | -0.338 |
| 149044388 | N/A              | N/A                                                          | -0.337 |
| 300797558 | ROPN1L           | rhopilin associated tail protein 1 like                      | -0.337 |
| 71361669  | CIT              | citron rho-interacting serine/threonine kinase               | -0.336 |
| 625254629 | N/A              | N/A                                                          | -0.336 |
| 672081597 | AGTR1            | angiotensin II receptor type 1                               | -0.336 |
| 564339225 | N/A              | N/A                                                          | -0.335 |
| 672046176 | N/A              | N/A                                                          | -0.335 |
| 148680122 | UNC5C            | unc-5 netrin receptor C                                      | -0.335 |
| 57527061  | ZGPAT            | zinc finger CCCH-type and G-patch domain containing          | -0.335 |
| 148683194 | INTS3            | integrator complex subunit 3                                 | -0.335 |
| 564317005 | TBC1D1           | TBC1 domain family member 1                                  | -0.335 |
| 672073977 | LOC103690089     | pleckstrin homology domain-containing family A member 6-like | -0.334 |



|           |                     |                                                                            |        |
|-----------|---------------------|----------------------------------------------------------------------------|--------|
| 672085480 | TLDC1               | TBC/LysM-associated domain containing 1                                    | -0.334 |
| 78486544  | SLC5A2              | solute carrier family 5 member 2                                           | -0.334 |
| 157819371 | SYNGR3              | synaptogyrin 3                                                             | -0.333 |
| 157822521 | EPPIN-WFDC6         | EPPIN-WFDC6 readthrough                                                    | -0.333 |
| 157819569 | TEAD2               | TEA domain transcription factor 2                                          | -0.333 |
| 18426814  | DHFR                | dihydrofolate reductase                                                    | -0.333 |
| 13786174  | TIMELESS            | timeless circadian regulator                                               | -0.332 |
| 57527498  | KLC4                | kinesin light chain 4                                                      | -0.331 |
| 537212823 | N/A                 | N/A                                                                        | -0.331 |
| 77539756  | MED24               | mediator complex subunit 24                                                | -0.331 |
| 157823597 | SLC39A5             | solute carrier family 39 member 5                                          | -0.331 |
| 524957514 | N/A                 | N/A                                                                        | -0.331 |
| 47059110  | DXO                 | decapping exoribonuclease                                                  | -0.330 |
| 13592129  | DOC2B               | double C2 domain beta                                                      | -0.330 |
| 149046900 | N/A                 | N/A                                                                        | -0.330 |
| 569006768 | N/A                 | N/A                                                                        | -0.330 |
| 300794275 | MFSD10              | major facilitator superfamily domain containing 10                         | -0.330 |
| 672038615 | GSG1L               | GSG1 like                                                                  | -0.330 |
| 300795285 | Cyp4f17             | cytochrome P450, family 4, subfamily f, polypeptide 17                     | -0.330 |
| 157824146 | ITGA5               | integrin subunit alpha 5                                                   | -0.329 |
| 564309649 | CCDC159             | coiled-coil domain containing 159                                          | -0.329 |
| 672038342 | XYLT1               | xylosyltransferase 1                                                       | -0.329 |
| 13591934  | CTBS                | chitobiase                                                                 | -0.329 |
| 84781644  | TMEM176A            | transmembrane protein 176A                                                 | -0.329 |
| 58865810  | NAGA                | alpha-N-acetylgalactosaminidase                                            | -0.328 |
| 157822761 | MICAL1              | microtubule associated monooxygenase, calponin and LIM domain containing 1 | -0.328 |
| 157787183 | KCND1               | potassium voltage-gated channel subfamily D member 1                       | -0.328 |
| 22024392  | KIF1C               | kinesin family member 1C                                                   | -0.328 |
| 77628027  | PSMC3IP             | PSMC3 interacting protein                                                  | -0.328 |
| 281604125 | Fam50a/LOC100910130 | family with sequence similarity 50, member A                               | -0.327 |
| 564393980 | ME2                 | malic enzyme 2                                                             | -0.327 |
| 564386482 | N/A                 | N/A                                                                        | -0.327 |
| 149030652 | TARS2               | threonyl-tRNA synthetase 2, mitochondrial                                  | -0.326 |
| 166851836 | CPA2                | carboxypeptidase A2                                                        | -0.326 |
| 61557206  | ZBTB16              | zinc finger and BTB domain containing 16                                   | -0.326 |

|           |                             |                                                          |        |
|-----------|-----------------------------|----------------------------------------------------------|--------|
| 21728394  | KLHL17                      | kelch like family member 17                              | -0.326 |
| 564344373 | ZMYND8                      | zinc finger MYND-type containing 8                       | -0.325 |
| 149066394 | SAMD12                      | sterile alpha motif domain containing 12                 | -0.325 |
| 149025799 | N/A                         | N/A                                                      | -0.325 |
| 149045696 | Ccl27a                      | chemokine (C-C motif) ligand 27A                         | -0.325 |
| 109475601 | GPATCH3                     | G-patch domain containing 3                              | -0.325 |
| 672016444 | N/A                         | N/A                                                      | -0.325 |
| 672043651 | FAM46C                      | family with sequence similarity 46 member C              | -0.324 |
| 109481229 | DBX2                        | developing brain homeobox 2                              | -0.324 |
| 18266696  | PDE7B                       | phosphodiesterase 7B                                     | -0.324 |
| 157819563 | ETHE1                       | ETHE1, persulfide dioxygenase                            | -0.324 |
| 31377530  | RASGRP1                     | RAS guanyl releasing protein 1                           | -0.324 |
| 62078809  | TNFAIP8L2                   | TNF alpha induced protein 8 like 2                       | -0.324 |
| 72255543  | MANBA                       | mannosidase beta                                         | -0.323 |
| 32452540  | RHOT2                       | ras homolog family member T2                             | -0.323 |
| 78214350  | COQ9                        | coenzyme Q9                                              | -0.323 |
| 51036680  | SLC29A3                     | solute carrier family 29 member 3                        | -0.322 |
| 6981186   | MAS1                        | MAS1 proto-oncogene, G protein-coupled receptor          | -0.322 |
| 56119152  | ABCB8                       | ATP binding cassette subfamily B member 8                | -0.321 |
| 958702531 | N/A                         | N/A                                                      | -0.321 |
| 45267819  | CAV2                        | caveolin 2                                               | -0.321 |
| 451172111 | HINT3                       | histidine triad nucleotide binding protein 3             | -0.321 |
| 564368910 | FN1                         | fibronectin 1                                            | -0.321 |
| 157821925 | IFT88                       | intraflagellar transport 88                              | -0.320 |
| 58865398  | LAP3                        | leucine aminopeptidase 3                                 | -0.320 |
| 50510855  | RIMKLB                      | ribosomal modification protein rimK like family member B | -0.320 |
| 635102546 | N/A                         | N/A                                                      | -0.320 |
| 672066518 | N/A                         | N/A                                                      | -0.320 |
| 672063876 | MGC116197 (includes others) | similar to RIKEN cDNA 1700001E04                         | -0.320 |
| 672033554 | LOC102557335                | uncharacterized LOC102557335                             | -0.319 |
| 564304076 | FGD5                        | FYVE, RhoGEF and PH domain containing 5                  | -0.319 |
| 18426850  | LCP2                        | lymphocyte cytosolic protein 2                           | -0.318 |
| 672079756 | N/A                         | N/A                                                      | -0.318 |
| 672026392 | PNPLA6                      | patatin like phospholipase domain containing 6           | -0.318 |
| 148705386 | SLC30A3                     | solute carrier family 30 member 3                        | -0.318 |
| 672050244 | APLF                        | aprataxin and PNKP like factor                           | -0.318 |
| 6678297   | TEX261                      | testis expressed 261                                     | -0.318 |

|           |                                |                                                                         |        |
|-----------|--------------------------------|-------------------------------------------------------------------------|--------|
| 148702301 | CYB561                         | cytochrome b561                                                         | -0.317 |
| 564343903 | DSN1                           | DSN1 homolog, MIS12 kinetochore complex component                       | -0.317 |
| 672043401 | POGZ                           | pogo transposable element derived with ZNF domain                       | -0.317 |
| 157823879 | NUDT12                         | nudix hydrolase 12                                                      | -0.317 |
| 157819457 | MAP3K14                        | mitogen-activated protein kinase kinase kinase 14                       | -0.317 |
| 19424260  | CDC25B                         | cell division cycle 25B                                                 | -0.317 |
| 755536182 | RHBDF1                         | rhomboid 5 homolog 1                                                    | -0.317 |
| 51948466  | TMED3                          | transmembrane p24 trafficking protein 3                                 | -0.316 |
| 40018538  | ADII                           | acireductone dioxygenase 1                                              | -0.316 |
| 443940    | CCNE1                          | cyclin E1                                                               | -0.316 |
| 139948516 | MANEA                          | mannosidase endo-alpha                                                  | -0.316 |
| 564318054 | R3hcc1                         | R3H domain and coiled-coil containing 1                                 | -0.316 |
| 157821205 | PAOX                           | polyamine oxidase                                                       | -0.316 |
| 70794782  | RBMS2                          | RNA binding motif single stranded interacting protein 2                 | -0.316 |
| 300797242 | SPG11                          | SPG11, spatacsin vesicle trafficking associated                         | -0.316 |
| 149052198 | NPRL3                          | NPR3 like, GATOR1 complex subunit                                       | -0.315 |
| 57528352  | DMAC2                          | distal membrane arm assembly complex 2                                  | -0.315 |
| 158631250 | HAUS8                          | HAUS augmin like complex subunit 8                                      | -0.315 |
| 672080674 | Myo16                          | myosin XVI                                                              | -0.315 |
| 16758502  | HCN3                           | hyperpolarization activated cyclic nucleotide gated potassium channel 3 | -0.314 |
| 8393896   | PACSN1                         | protein kinase C and casein kinase substrate in neurons 1               | -0.314 |
| 149021160 | N/A                            | N/A                                                                     | -0.313 |
| 281332095 | RB1                            | RB transcriptional corepressor 1                                        | -0.313 |
| 149041432 | THY1                           | Thy-1 cell surface antigen                                              | -0.313 |
| 61557127  | NNT                            | nicotinamide nucleotide transhydrogenase                                | -0.313 |
| 148686123 | CEND1                          | cell cycle exit and neuronal differentiation 1                          | -0.313 |
| 157786608 | MRPL55                         | mitochondrial ribosomal protein L55                                     | -0.313 |
| 148702078 | CPSF3                          | cleavage and polyadenylation specific factor 3                          | -0.312 |
| 672084625 | LOC100909409 (includes others) | RGD1562660                                                              | -0.312 |
| 157821393 | LRRC20                         | leucine rich repeat containing 20                                       | -0.312 |
| 12849161  | NRARP                          | NOTCH regulated ankyrin repeat protein                                  | -0.312 |
| 667290090 | N/A                            | N/A                                                                     | -0.312 |
| 210033118 | COG1                           | component of oligomeric golgi complex 1                                 | -0.311 |

|           |         |                                                                            |        |
|-----------|---------|----------------------------------------------------------------------------|--------|
| 68163523  | TTC26   | tetratricopeptide repeat domain 26                                         | -0.311 |
| 109484871 | HERC1   | HECT and RLD domain containing E3 ubiquitin protein ligase family member 1 | -0.310 |
| 564360941 | N/A     | N/A                                                                        | -0.310 |
| 63101489  | ACHE    | acetylcholinesterase (Cartwright blood group)                              | -0.310 |
| 157823815 | ILVBL   | ilvB acetolactate synthase like                                            | -0.310 |
| 78187981  | TRPV2   | transient receptor potential cation channel subfamily V member 2           | -0.309 |
| 564336403 | EXOSC8  | exosome component 8                                                        | -0.309 |
| 62078551  | GNB4    | G protein subunit beta 4                                                   | -0.309 |
| 149063353 | IFT81   | intraflagellar transport 81                                                | -0.309 |
| 392342224 | N/A     | N/A                                                                        | -0.308 |
| 197313632 | FRZB    | frizzled related protein                                                   | -0.308 |
| 38541109  | BSPRY   | B-box and SPRY domain containing                                           | -0.308 |
| 167860097 | FN3KRP  | fructosamine 3 kinase related protein                                      | -0.308 |
| 672067893 | N/A     | N/A                                                                        | -0.308 |
| 12621108  | NR1I3   | nuclear receptor subfamily 1 group I member 3                              | -0.308 |
| 16758084  | CCS     | copper chaperone for superoxide dismutase                                  | -0.308 |
| 77628037  | PEX7    | peroxisomal biogenesis factor 7                                            | -0.307 |
| 171847060 | TTC8    | tetratricopeptide repeat domain 8                                          | -0.306 |
| 61556910  | SNX10   | sorting nexin 10                                                           | -0.306 |
| 83320086  | RBM43   | RNA binding motif protein 43                                               | -0.306 |
| 966975500 | MMP17   | matrix metalloproteinase 17                                                | -0.306 |
| 58865938  | CRYZ    | crystallin zeta                                                            | -0.306 |
| 29789369  | PTPRG   | protein tyrosine phosphatase, receptor type G                              | -0.306 |
| 564326692 | ZC3H4   | zinc finger CCCH-type containing 4                                         | -0.306 |
| 545532952 | EIF4E3  | eukaryotic translation initiation factor 4E family member 3                | -0.305 |
| 115292425 | KIRREL3 | kirre like nephrin family adhesion molecule 3                              | -0.305 |
| 564372688 | RPA1    | replication protein A1                                                     | -0.305 |
| 399124777 | GLS2    | glutaminase 2                                                              | -0.305 |
| 16758656  | BAK1    | BCL2 antagonist/killer 1                                                   | -0.305 |
| 755566690 | HUWE1   | HECT, UBA and WWE domain containing 1, E3 ubiquitin protein ligase         | -0.305 |
| 655851627 | N/A     | N/A                                                                        | -0.304 |
| 11119239  | SYT13   | synaptotagmin 13                                                           | -0.304 |
| 568961602 | VPS13C  | vacuolar protein sorting 13 homolog C                                      | -0.304 |
| 31982028  | RSU1    | Ras suppressor protein 1                                                   | -0.304 |
| 564356909 | N/A     | N/A                                                                        | -0.304 |
| 31982487  | BMP7    | bone morphogenetic protein 7                                               | -0.304 |

|           |         |                                                            |        |
|-----------|---------|------------------------------------------------------------|--------|
| 672080024 | N/A     | N/A                                                        | -0.304 |
| 300796069 | THADA   | THADA, armadillo repeat containing                         | -0.303 |
| 56090361  | EPDR1   | ependymin related 1                                        | -0.303 |
| 149023323 | GFRA4   | GDNF family receptor alpha 4                               | -0.303 |
| 157819589 | BOLA3   | bolA family member 3                                       | -0.303 |
| 564352420 | MKNK1   | MAP kinase interacting serine/threonine kinase 1           | -0.302 |
| 198041989 | PARVB   | parvin beta                                                | -0.302 |
| 13929176  | WFS1    | wolframín ER transmembrane glycoprotein                    | -0.302 |
| 564376043 | PIGP    | phosphatidylinositol glycan anchor biosynthesis class P    | -0.302 |
| 6978575   | TSPO    | translocator protein                                       | -0.302 |
| 13540624  | GRK5    | G protein-coupled receptor kinase 5                        | -0.302 |
| 40352944  | NXT2    | nuclear transport factor 2 like export factor 2            | -0.302 |
| 564341926 | N/A     | N/A                                                        | -0.301 |
| 149024259 | RCAN3   | RCAN family member 3                                       | -0.301 |
| 672066518 | N/A     | N/A                                                        | -0.301 |
| 149024818 | MIB2    | mindbomb E3 ubiquitin protein ligase 2                     | -0.300 |
| 21245116  | Nradd   | neurotrophin receptor associated death domain              | -0.299 |
| 198278496 | C1R     | complement C1r                                             | -0.299 |
| 12621142  | RASSF9  | Ras association domain family member 9                     | -0.299 |
| 158635969 | FLAD1   | flavin adenine dinucleotide synthetase 1                   | -0.299 |
| 124107592 | MYO1C   | myosin IC                                                  | -0.298 |
| 149030301 | PNOC    | prepronociceptin                                           | -0.298 |
| 564365342 | N/A     | N/A                                                        | -0.298 |
| 157820737 | NUSAP1  | nucleolar and spindle associated protein 1                 | -0.298 |
| 210031334 | NGEF    | neuronal guanine nucleotide exchange factor                | -0.298 |
| 564397303 | CCDC167 | coiled-coil domain containing 167                          | -0.297 |
| 19173736  | SCPEP1  | serine carboxypeptidase 1                                  | -0.297 |
| 672040378 | N/A     | N/A                                                        | -0.297 |
| 38259192  | TOP2A   | DNA topoisomerase II alpha                                 | -0.297 |
| 160961483 | Serinc4 | serine incorporator 4                                      | -0.297 |
| 162287198 | HSD17B4 | hydroxysteroid 17-beta dehydrogenase 4                     | -0.297 |
| 954249788 | N/A     | N/A                                                        | -0.296 |
| 149024084 | COL16A1 | collagen type XVI alpha 1 chain                            | -0.296 |
| 148705684 | SLIT2   | slit guidance ligand 2                                     | -0.296 |
| 157822933 | ZNF385A | zinc finger protein 385A                                   | -0.296 |
| 149016018 | N/A     | N/A                                                        | -0.296 |
| 83025052  | ANKS6   | ankyrin repeat and sterile alpha motif domain containing 6 | -0.296 |

|           |         |                                                      |        |
|-----------|---------|------------------------------------------------------|--------|
| 51036684  | G6PC3   | glucose-6-phosphatase catalytic subunit 3            | -0.296 |
| 149032924 | ARG1    | arginase 1                                           | -0.296 |
| 109491454 | UTP6    | UTP6, small subunit processome component             | -0.296 |
| 6978789   | SPARCL1 | SPARC like 1                                         | -0.295 |
| 404247454 | COL26A1 | collagen type XXVI alpha 1 chain                     | -0.295 |
| 686661093 | SLC24A3 | solute carrier family 24 member 3                    | -0.295 |
| 8393992   | PMP22   | peripheral myelin protein 22                         | -0.295 |
| 731271938 | N/A     | N/A                                                  | -0.294 |
| 58865848  | PLSCR3  | phospholipid scramblase 3                            | -0.294 |
| 403048729 | PAQR9   | progesterin and adipoQ receptor family member 9      | -0.294 |
| 149039905 | TSPAN17 | tetraspanin 17                                       | -0.294 |
| 6978888   | GFRA1   | GDNF family receptor alpha 1                         | -0.294 |
| 27465523  | KCNA1   | potassium voltage-gated channel subfamily A member 1 | -0.294 |
| 6981474   | GFRA2   | GDNF family receptor alpha 2                         | -0.294 |
| 68341971  | MINDY1  | MINDY lysine 48 deubiquitinase 1                     | -0.294 |
| 53850628  | NDUFS1  | NADH:ubiquinone oxidoreductase core subunit S1       | -0.294 |
| 984128285 | N/A     | N/A                                                  | -0.294 |
| 149058109 | HSD17B7 | hydroxysteroid 17-beta dehydrogenase 7               | -0.294 |
| 762005996 | AFAP1L2 | actin filament associated protein 1 like 2           | -0.293 |
| 672035779 | Proser3 | proline and serine rich 3                            | -0.293 |
| 167560911 | SGF29   | SAGA complex associated factor 29                    | -0.293 |
| 149023046 | N/A     | N/A                                                  | -0.293 |
| 164519052 | ARSA    | arylsulfatase A                                      | -0.292 |
| 55741426  | NFKBIB  | NFKB inhibitor beta                                  | -0.292 |
| 564358911 | CHPT1   | choline phosphotransferase 1                         | -0.292 |
| 157822577 | MAN1C1  | mannosidase alpha class 1C member 1                  | -0.292 |
| 215272415 | LMO2    | LIM domain only 2                                    | -0.292 |
| 28972363  | DOCK4   | dedicator of cytokinesis 4                           | -0.292 |
| 83816933  | AP4M1   | adaptor related protein complex 4 mu 1 subunit       | -0.291 |
| 157817979 | Egfem1  | EGF-like and EMI domain containing 1                 | -0.291 |
| 148701441 | N/A     | N/A                                                  | -0.291 |
| 672065746 | SCLY    | selenocysteine lyase                                 | -0.291 |
| 27545388  | ABCA5   | ATP binding cassette subfamily A member 5            | -0.291 |
| 564400249 | LIMA1   | LIM domain and actin binding 1                       | -0.290 |
| 820987601 | N/A     | N/A                                                  | -0.290 |
| 670979961 | N/A     | N/A                                                  | -0.290 |
| 74271892  | RPAIN   | RPA interacting protein                              | -0.290 |
| 402794599 | PRR22   | proline rich 22                                      | -0.290 |

|           |               |                                                              |        |
|-----------|---------------|--------------------------------------------------------------|--------|
| 197313640 | TMEM132E      | transmembrane protein 132E                                   | -0.290 |
| 74223968  | 5031425E22Rik | RIKEN cDNA 5031425E22 gene                                   | -0.290 |
| 149057745 | NEK3          | NIMA related kinase 3                                        | -0.290 |
| 30519995  | SFXN5         | sideroflexin 5                                               | -0.289 |
| 149063995 | GMPR2         | guanosine monophosphate reductase 2                          | -0.289 |
| 162287200 | CD82          | CD82 molecule                                                | -0.289 |
| 537140956 | N/A           | N/A                                                          | -0.289 |
| 310772205 | MAP7          | microtubule associated protein 7                             | -0.289 |
| 564302385 | C20orf196     | chromosome 20 open reading frame 196                         | -0.289 |
| 12018270  | PNPO          | pyridoxamine 5'-phosphate oxidase                            | -0.288 |
| 12844128  | CCDC90B       | coiled-coil domain containing 90B                            | -0.288 |
| 157821439 | CPNE5         | copine 5                                                     | -0.288 |
| 672083256 | MYO5B         | myosin VB                                                    | -0.287 |
| 27465571  | BRINP3        | BMP/retinoic acid inducible neural specific 3                | -0.287 |
| 157820517 | CARD6         | caspase recruitment domain family member 6                   | -0.287 |
| 157786648 | SMYD4         | SET and MYND domain containing 4                             | -0.287 |
| 149022622 | ACP2          | acid phosphatase 2, lysosomal                                | -0.287 |
| 564387894 | BTD           | biotinidase                                                  | -0.287 |
| 157820833 | HERC3         | HECT and RLD domain containing E3 ubiquitin protein ligase 3 | -0.287 |
| 402765953 | 0610009B22Rik | RIKEN cDNA 0610009B22 gene                                   | -0.287 |
| 51948412  | ETFB          | electron transfer flavoprotein beta subunit                  | -0.286 |
| 6981208   | NR3C2         | nuclear receptor subfamily 3 group C member 2                | -0.286 |
| 198386336 | NAT9          | N-acetyltransferase 9 (putative)                             | -0.286 |
| 406362834 | MYLIP         | myosin regulatory light chain interacting protein            | -0.286 |
| 9507083   | SEMA4F        | ssemaphorin 4F                                               | -0.286 |
| 8394443   | TFPI          | tissue factor pathway inhibitor                              | -0.286 |
| 16758138  | POMT1         | protein O-mannosyltransferase 1                              | -0.285 |
| 300669604 | ADAM15        | ADAM metallopeptidase domain 15                              | -0.285 |
| 157818065 | GPR21         | G protein-coupled receptor 21                                | -0.285 |
| 564329612 | ME3           | malic enzyme 3                                               | -0.284 |
| 564319191 | MCPH1         | microcephalin 1                                              | -0.284 |
| 6754024   | GNG4          | G protein subunit gamma 4                                    | -0.284 |
| 672013431 | N/A           | N/A                                                          | -0.283 |
| 392338478 | TTC37         | tetratricopeptide repeat domain 37                           | -0.283 |
| 672074685 | ILDR2         | immunoglobulin like domain containing receptor 2             | -0.283 |
| 189181708 | RWDD2B        | RWD domain containing 2B                                     | -0.283 |
| 76559913  | COG7          | component of oligomeric golgi complex 7                      | -0.283 |
| 564396646 | VARS2         | valyl-tRNA synthetase 2, mitochondrial                       | -0.283 |

|           |          |                                                                 |        |
|-----------|----------|-----------------------------------------------------------------|--------|
| 194272139 | TCERG1L  | transcription elongation regulator 1 like                       | -0.283 |
| 56605636  | TMEM254  | transmembrane protein 254                                       | -0.283 |
| 149034870 | RNF6     | ring finger protein 6                                           | -0.283 |
| 149053229 | CAMTA2   | calmodulin binding transcription activator 2                    | -0.282 |
| 21489989  | KCNH8    | potassium voltage-gated channel subfamily H member 8            | -0.282 |
| 157823996 | ELK3     | ELK3, ETS transcription factor                                  | -0.282 |
| 564367076 | Mocs1    | molybdenum cofactor synthesis 1                                 | -0.281 |
| 564317068 | CCDC149  | coiled-coil domain containing 149                               | -0.281 |
| 672055289 | PLEKHH2  | pleckstrin homology, MyTH4 and FERM domain containing H2        | -0.281 |
| 392338823 | TIPARP   | TCDD inducible poly(ADP-ribose) polymerase                      | -0.281 |
| 13786144  | PREP     | prolyl endopeptidase                                            | -0.281 |
| 197313643 | GLTP     | glycolipid transfer protein                                     | -0.280 |
| 261599034 | IL1RAPL2 | interleukin 1 receptor accessory protein like 2                 | -0.280 |
| 564361358 | PPARA    | peroxisome proliferator activated receptor alpha                | -0.280 |
| 755520134 | N/A      | N/A                                                             | -0.280 |
| 16758716  | CACNB2   | calcium voltage-gated channel auxiliary subunit beta 2          | -0.279 |
| 402747140 | SPN      | sialophorin                                                     | -0.279 |
| 50510949  | N/A      | N/A                                                             | -0.279 |
| 149025408 | N/A      | N/A                                                             | -0.279 |
| 77539442  | EPHX1    | epoxide hydrolase 1                                             | -0.279 |
| 60097941  | HP       | haptoglobin                                                     | -0.279 |
| 457866801 | PCSK5    | proprotein convertase subtilisin/kexin type 5                   | -0.279 |
| 142349612 | GLUL     | glutamate-ammonia ligase                                        | -0.279 |
| 197927244 | TIE1     | tyrosine kinase with immunoglobulin like and EGF like domains 1 | -0.278 |
| 72255507  | CD68     | CD68 molecule                                                   | -0.278 |
| 13928886  | MAP2K1   | mitogen-activated protein kinase kinase 1                       | -0.278 |
| 21728400  | Ggt1     | glycoprotein galactosyltransferase alpha 1, 3                   | -0.278 |
| 157818005 | HPS3     | HPS3, biogenesis of lysosomal organelles complex 2 subunit 1    | -0.277 |
| 148701441 | N/A      | N/A                                                             | -0.277 |
| 21687008  | CACNG3   | calcium voltage-gated channel auxiliary subunit gamma 3         | -0.277 |
| 209447075 | DLGAP5   | DLG associated protein 5                                        | -0.276 |
| 672073723 | GLI2     | GLI family zinc finger 2                                        | -0.276 |
| 56090612  | CDCA3    | cell division cycle associated 3                                | -0.276 |



|           |                     |                                                                    |        |
|-----------|---------------------|--------------------------------------------------------------------|--------|
| 564364473 | RNF111              | ring finger protein 111                                            | -0.276 |
| 29789104  | NAPB                | NSF attachment protein beta                                        | -0.276 |
| 149016843 | N/A                 | N/A                                                                | -0.275 |
| 330340430 | WDR19               | WD repeat domain 19                                                | -0.275 |
| 56090313  | MOCS2               | molybdenum cofactor synthesis 2                                    | -0.275 |
| 672082700 | N/A                 | N/A                                                                | -0.275 |
| 672083159 | N/A                 | N/A                                                                | -0.274 |
| 226874871 | OMG                 | oligodendrocyte myelin glycoprotein                                | -0.274 |
| 189592666 | KHDRBS2             | KH RNA binding domain containing, signal transduction associated 2 | -0.274 |
| 48843737  | FANCD2              | Fanconi anemia complementation group D2                            | -0.274 |
| 134948398 | PDS5A               | PDS5 cohesin associated factor A                                   | -0.274 |
| 213972556 | OXSM                | 3-oxoacyl-ACP synthase, mitochondrial                              | -0.273 |
| 157819133 | GPR75               | G protein-coupled receptor 75                                      | -0.273 |
| 157822627 | PLXDC2              | plexin domain containing 2                                         | -0.273 |
| 62078997  | WDR1                | WD repeat domain 1                                                 | -0.273 |
| 62079057  | IL33                | interleukin 33                                                     | -0.273 |
| 56605664  | METTL23             | methyltransferase like 23                                          | -0.272 |
| 12018318  | NPHS1               | NPHS1, nephrin                                                     | -0.272 |
| 149039219 | SARDH               | sarcosine dehydrogenase                                            | -0.272 |
| 586547666 | N/A                 | N/A                                                                | -0.272 |
| 157820147 | TNFRSF10A           | TNF receptor superfamily member 10a                                | -0.272 |
| 532055548 | N/A                 | N/A                                                                | -0.271 |
| 157820447 | SDSL                | serine dehydratase like                                            | -0.271 |
| 29126232  | SLCO3A1             | solute carrier organic anion transporter family member 3A1         | -0.271 |
| 197333840 | CAMKMT              | calmodulin-lysine N-methyltransferase                              | -0.270 |
| 157821645 | C8orf59             | chromosome 8 open reading frame 59                                 | -0.270 |
| 149022319 | AGPS                | alkylglycerone phosphate synthase                                  | -0.270 |
| 197387642 | ZNF710              | zinc finger protein 710                                            | -0.270 |
| 392339871 | PARP12              | poly(ADP-ribose) polymerase family member 12                       | -0.270 |
| 38454238  | Rab15               | RAB15, member RAS oncogene family                                  | -0.270 |
| 157819337 | SLC35B4             | solute carrier family 35 member B4                                 | -0.270 |
| 158508684 | BCAS1               | breast carcinoma amplified sequence 1                              | -0.270 |
| 149068830 | SLCO2B1             | solute carrier organic anion transporter family member 2B1         | -0.270 |
| 148701892 | EBF1                | early B cell factor 1                                              | -0.270 |
| 66730535  | Armcx1/LOC102554790 | armadillo repeat containing, X-linked 1                            | -0.270 |

|           |              |                                                      |        |
|-----------|--------------|------------------------------------------------------|--------|
| 57164113  | NSDHL        | NAD(P) dependent steroid dehydrogenase-like          | -0.269 |
| 524955710 | N/A          | N/A                                                  | -0.269 |
| 672076787 | N/A          | N/A                                                  | -0.269 |
| 576796148 | MAP7D2       | MAP7 domain containing 2                             | -0.269 |
| 157817953 | RPGRIP1L     | RPGRIP1 like                                         | -0.269 |
| 300795283 | SHROOM4      | shroom family member 4                               | -0.269 |
| 13027442  | ARHGEF11     | Rho guanine nucleotide exchange factor 11            | -0.269 |
| 74354506  | ACBD5        | acyl-CoA binding domain containing 5                 | -0.269 |
| 219804406 | DOCK1        | dedicator of cytokinesis 1                           | -0.269 |
| 25742783  | PLK1         | polo like kinase 1                                   | -0.269 |
| 149016965 | GRB10        | growth factor receptor bound protein 10              | -0.268 |
| 148690381 | BRICD5       | BRICHOS domain containing 5                          | -0.268 |
| 197313676 | AIG1         | androgen induced 1                                   | -0.268 |
| 635147633 | N/A          | N/A                                                  | -0.268 |
| 392339847 | CADPS2       | calcium dependent secretion activator 2              | -0.268 |
| 928136440 | SRRT         | serrate, RNA effector molecule                       | -0.268 |
| 149040074 | FAM107A      | family with sequence similarity 107 member A         | -0.267 |
| 10242377  | GRIK4        | glutamate ionotropic receptor kainate type subunit 4 | -0.267 |
| 157821289 | SOX8         | SRY-box 8                                            | -0.267 |
| 38181552  | SCG2         | secretogranin II                                     | -0.267 |
| 11177880  | VAPB         | VAMP associated protein B and C                      | -0.267 |
| 158631185 | XPO5         | exportin 5                                           | -0.267 |
| 300797332 | DCP1A        | decapping mRNA 1A                                    | -0.267 |
| 672033256 | LOC100912904 | disks large homolog 5-like                           | -0.267 |
| 149017535 | HDAC10       | histone deacetylase 10                               | -0.267 |
| 52138628  | RAP1B        | RAP1B, member of RAS oncogene family                 | -0.267 |
| 157786622 | ALOXE3       | arachidonate lipoxygenase 3                          | -0.266 |
| 157819753 | RCN1         | reticulocalbin 1                                     | -0.266 |
| 859847521 | N/A          | N/A                                                  | -0.266 |
| 13786142  | SLIT3        | slit guidance ligand 3                               | -0.266 |
| 672051414 | N/A          | N/A                                                  | -0.266 |
| 564338026 | BCL9         | B cell CLL/lymphoma 9                                | -0.265 |
| 300795339 | RYR2         | ryanodine receptor 2                                 | -0.265 |
| 29789271  | RAB13        | RAB13, member RAS oncogene family                    | -0.265 |
| 157820795 | BBS1         | Bardet-Biedl syndrome 1                              | -0.265 |
| 564382316 | HSD11B1      | hydroxysteroid 11-beta dehydrogenase 1               | -0.265 |
| 208973280 | TRIM65       | tripartite motif containing 65                       | -0.265 |
| 387935412 | ZCCHC4       | zinc finger CCHC-type containing 4                   | -0.264 |
| 672037217 | OTUD7A       | OTU deubiquitinase 7A                                | -0.264 |

|           |                             |                                                                        |        |
|-----------|-----------------------------|------------------------------------------------------------------------|--------|
| 149041411 | SC5D                        | sterol-C5-desaturase                                                   | -0.264 |
| 148372343 | RAMP2                       | receptor activity modifying protein 2                                  | -0.264 |
| 205294    | ME1                         | malic enzyme 1                                                         | -0.264 |
| 219275534 | VPS13A                      | vacuolar protein sorting 13 homolog A                                  | -0.264 |
| 148668227 | GPC6                        | glypican 6                                                             | -0.264 |
| 13540701  | OGG1                        | 8-oxoguanine DNA glycosylase                                           | -0.264 |
| 672083937 | TSHZ1                       | teashirt zinc finger homeobox 1                                        | -0.264 |
| 157822535 | LATS2                       | large tumor suppressor kinase 2                                        | -0.264 |
| 148703340 | SERTM1                      | serine rich and transmembrane domain containing 1                      | -0.263 |
| 158341630 | MPG                         | N-methylpurine DNA glycosylase                                         | -0.263 |
| 826286496 | N/A                         | N/A                                                                    | -0.263 |
| 157821975 | ZCCHC24                     | zinc finger CCHC-type containing 24                                    | -0.263 |
| 148696365 | AP5S1                       | adaptor related protein complex 5 sigma 1 subunit                      | -0.262 |
| 157819183 | FAM212B                     | family with sequence similarity 212 member B                           | -0.262 |
| 149020634 | TAF1D                       | TATA-box binding protein associated factor, RNA polymerase I subunit D | -0.262 |
| 149054651 | N/A                         | N/A                                                                    | -0.262 |
| 403225019 | SGO2                        | shugoshin 2                                                            | -0.262 |
| 747165376 | BUB1B                       | BUB1 mitotic checkpoint serine/threonine kinase B                      | -0.262 |
| 281427203 | TMEM260                     | transmembrane protein 260                                              | -0.262 |
| 564335541 | RGD1310081                  | similar to hypothetical protein FLJ13231                               | -0.262 |
| 157821525 | GLYCK                       | glycerate kinase                                                       | -0.261 |
| 564344520 | LOC102555457                | engulfment and cell motility protein 2-like                            | -0.261 |
| 524957674 | N/A                         | N/A                                                                    | -0.261 |
| 672048779 | N/A                         | N/A                                                                    | -0.261 |
| 227913    | N/A                         | N/A                                                                    | -0.261 |
| 157817017 | MRPS16                      | mitochondrial ribosomal protein S16                                    | -0.261 |
| 77627987  | DARS2                       | aspartyl-tRNA synthetase 2, mitochondrial                              | -0.261 |
| 564389540 | MGC116197 (includes others) | similar to RIKEN cDNA 1700001E04                                       | -0.260 |
| 564372831 | N/A                         | N/A                                                                    | -0.260 |
| 13929166  | CLIC4                       | chloride intracellular channel 4                                       | -0.259 |
| 157821191 | CHST11                      | carbohydrate sulfotransferase 11                                       | -0.259 |
| 77993374  | ARSB                        | arylsulfatase B                                                        | -0.259 |
| 157817284 | MRPL42                      | mitochondrial ribosomal protein L42                                    | -0.259 |
| 18266702  | BNIP1                       | BCL2 interacting protein 1                                             | -0.258 |
| 564382292 | ANGEL2                      | angel homolog 2                                                        | -0.258 |

|           |          |                                                                        |        |
|-----------|----------|------------------------------------------------------------------------|--------|
| 594667802 | N/A      | N/A                                                                    | -0.258 |
| 149023046 | N/A      | N/A                                                                    | -0.258 |
| 149060525 | FSTL1    | follistatin like 1                                                     | -0.258 |
| 114145534 | Mtap     | methylthioadenosine phosphorylase                                      | -0.258 |
| 157787147 | TEK      | TEK receptor tyrosine kinase                                           | -0.258 |
| 109476714 | FOCAD    | focadhesin                                                             | -0.258 |
| 157820403 | RARS2    | arginyl-tRNA synthetase 2, mitochondrial                               | -0.257 |
| 625270039 | N/A      | N/A                                                                    | -0.257 |
| 17865325  | GLRB     | glycine receptor beta                                                  | -0.256 |
| 148700512 | NRSN1    | neurensin 1                                                            | -0.256 |
| 58865672  | CAGE1    | cancer antigen 1                                                       | -0.256 |
| 21245094  | MAN2C1   | mannosidase alpha class 2C member 1                                    | -0.256 |
| 300795738 | RASSF8   | Ras association domain family member 8                                 | -0.255 |
| 148671944 | N/A      | N/A                                                                    | -0.255 |
| 255708437 | PIK3CD   | phosphatidylinositol-4,5-bisphosphate 3-kinase catalytic subunit delta | -0.255 |
| 140971205 | GRIN2A   | glutamate ionotropic receptor NMDA type subunit 2A                     | -0.255 |
| 667299645 | N/A      | N/A                                                                    | -0.255 |
| 564344961 | RTEL1    | regulator of telomere elongation helicase 1                            | -0.254 |
| 9507167   | SYNGR1   | synaptogyrin 1                                                         | -0.254 |
| 51948504  | KNSTRN   | kinetochore localized astrin/SPAG5 binding protein                     | -0.254 |
| 149017194 | KDM3B    | lysine demethylase 3B                                                  | -0.254 |
| 564341663 | SLC43A3  | solute carrier family 43 member 3                                      | -0.254 |
| 57164145  | NT5DC2   | 5'-nucleotidase domain containing 2                                    | -0.254 |
| 16758538  | RASGRF2  | Ras protein specific guanine nucleotide releasing factor 2             | -0.254 |
| 470611409 | N/A      | N/A                                                                    | -0.254 |
| 953867923 | N/A      | N/A                                                                    | -0.254 |
| 50510975  | RUFY2    | RUN and FYVE domain containing 2                                       | -0.253 |
| 564346652 | ZNF775   | zinc finger protein 775                                                | -0.253 |
| 564320452 | SAP130   | Sin3A associated protein 130                                           | -0.253 |
| 157818605 | ABCG4    | ATP binding cassette subfamily G member 4                              | -0.253 |
| 62078973  | MIF4GD   | MIF4G domain containing                                                | -0.253 |
| 672041250 | ARHGEF28 | Rho guanine nucleotide exchange factor 28                              | -0.253 |
| 22902132  | RBM10    | RNA binding motif protein 10                                           | -0.252 |
| 18034793  | GABRG1   | gamma-aminobutyric acid type A receptor gamma1 subunit                 | -0.252 |

|           |          |                                                             |        |
|-----------|----------|-------------------------------------------------------------|--------|
| 148696839 | RFXANK   | regulatory factor X associated ankyrin containing protein   | -0.252 |
| 31560385  | RPL21    | ribosomal protein L21                                       | -0.252 |
| 56605728  | TMEM218  | transmembrane protein 218                                   | -0.251 |
| 148677779 | N/A      | N/A                                                         | -0.251 |
| 431910532 | N/A      | N/A                                                         | -0.251 |
| 291190715 | ITGA8    | integrin subunit alpha 8                                    | -0.251 |
| 880855451 | N/A      | N/A                                                         | -0.251 |
| 664708230 | N/A      | N/A                                                         | -0.251 |
| 157786892 | POP7     | POP7 homolog, ribonuclease P/MRP subunit                    | -0.250 |
| 157823169 | LRRC61   | leucine rich repeat containing 61                           | -0.250 |
| 158749613 | UROD     | uroporphyrinogen decarboxylase                              | -0.250 |
| 568959109 | CEP164   | centrosomal protein 164                                     | -0.250 |
| 149046389 | ARID5A   | AT-rich interaction domain 5A                               | -0.249 |
| 537146226 | N/A      | N/A                                                         | -0.249 |
| 12018276  | HPSE     | heparanase                                                  | -0.249 |
| 28212254  | IGF2BP1  | insulin like growth factor 2 mRNA binding protein 1         | -0.249 |
| 6978435   | ACADVL   | acyl-CoA dehydrogenase very long chain                      | -0.249 |
| 426357412 | N/A      | N/A                                                         | -0.249 |
| 8394502   | UBC      | ubiquitin C                                                 | -0.249 |
| 537217423 | N/A      | N/A                                                         | -0.249 |
| 149057830 | Hgsnat   | heparan-alpha-glucosaminide N-acetyltransferase             | -0.248 |
| 564371801 | TBC1D9B  | TBC1 domain family member 9B                                | -0.248 |
| 158186732 | GFAP     | glial fibrillary acidic protein                             | -0.248 |
| 157819311 | LRGUK    | leucine rich repeats and guanylate kinase domain containing | -0.248 |
| 6978485   | ALAS2    | 5'-aminolevulinate synthase 2                               | -0.248 |
| 392341280 | NCAPG2   | non-SMC condensin II complex subunit G2                     | -0.248 |
| 61097902  | ABCC4    | ATP binding cassette subfamily C member 4                   | -0.248 |
| 58219512  | TMEM120A | transmembrane protein 120A                                  | -0.248 |
| 187469267 | GPRC5B   | G protein-coupled receptor class C group 5 member B         | -0.247 |
| 128485638 | PLOD3    | procollagen-lysine,2-oxoglutarate 5-dioxygenase 3           | -0.247 |
| 157823901 | TSPAN9   | tetraspanin 9                                               | -0.247 |
| 641706489 | N/A      | N/A                                                         | -0.247 |
| 157818445 | C1orf50  | chromosome 1 open reading frame 50                          | -0.247 |
| 564304730 | N/A      | N/A                                                         | -0.246 |

|           |          |                                                            |        |
|-----------|----------|------------------------------------------------------------|--------|
| 298493223 | TMEM132B | transmembrane protein 132B                                 | -0.246 |
| 59858990  | UNC13A   | unc-13 homolog A                                           | -0.246 |
| 27754155  | CLIP4    | CAP-Gly domain containing linker protein family member 4   | -0.246 |
| 157819077 | TRIM37   | tripartite motif containing 37                             | -0.246 |
| 58865500  | STOM     | stomatin                                                   | -0.246 |
| 61557172  | GULP1    | GULP, engulfment adaptor PTB domain containing 1           | -0.245 |
| 15805026  | ZFAND6   | zinc finger AN1-type containing 6                          | -0.245 |
| 296439269 | PHF10    | PHD finger protein 10                                      | -0.245 |
| 6978631   | CD4      | CD4 molecule                                               | -0.245 |
| 568974832 | YBX2     | Y-box binding protein 2                                    | -0.245 |
| 54312094  | DAGLA    | diacylglycerol lipase alpha                                | -0.244 |
| 564391295 | DUSP22   | dual specificity phosphatase 22                            | -0.244 |
| 672071009 | N/A      | N/A                                                        | -0.244 |
| 209364562 | Fundc2   | FUN14 domain containing 2                                  | -0.244 |
| 70794768  | HDAC1    | histone deacetylase 1                                      | -0.244 |
| 300794684 | MSH3     | mutS homolog 3                                             | -0.244 |
| 164607158 | PTPRR    | protein tyrosine phosphatase, receptor type R              | -0.244 |
| 861445795 | N/A      | N/A                                                        | -0.244 |
| 85861168  | SLC39A13 | solute carrier family 39 member 13                         | -0.244 |
| 67078466  | CYP2U1   | cytochrome P450 family 2 subfamily U member 1              | -0.244 |
| 62543513  | PTGR2    | prostaglandin reductase 2                                  | -0.244 |
| 56090433  | GLT8D1   | glycosyltransferase 8 domain containing 1                  | -0.243 |
| 564369492 | HJURP    | Holliday junction recognition protein                      | -0.243 |
| 13162287  | DDT      | D-dopachrome tautomerase                                   | -0.243 |
| 290563168 | DUSP3    | dual specificity phosphatase 3                             | -0.243 |
| 157823659 | Eefsec   | eukaryotic elongation factor, selenocysteine-tRNA-specific | -0.243 |
| 13242271  | SLC6A11  | solute carrier family 6 member 11                          | -0.242 |
| 13095924  | DRP2     | dystrophin related protein 2                               | -0.242 |
| 12018300  | AKAP6    | A-kinase anchoring protein 6                               | -0.242 |
| 198442857 | NEK4     | NIMA related kinase 4                                      | -0.242 |
| 66730317  | LYSMD1   | LysM domain containing 1                                   | -0.242 |
| 764020083 | CLUH     | clustered mitochondria homolog                             | -0.242 |
| 77917570  | ENDO G   | endonuclease G                                             | -0.242 |
| 300793894 | URB1     | URB1 ribosome biogenesis 1 homolog (S. cerevisiae)         | -0.242 |
| 299829287 | DISP2    | dispatched RND transporter family member 2                 | -0.242 |

|           |         |                                                               |        |
|-----------|---------|---------------------------------------------------------------|--------|
| 25453420  | GSTP1   | glutathione S-transferase pi 1                                | -0.241 |
| 197382169 | CNTROB  | centrobin, centriole duplication and spindle assembly protein | -0.241 |
| 564319079 | N/A     | N/A                                                           | -0.241 |
| 236467366 | CGREF1  | cell growth regulator with EF-hand domain 1                   | -0.241 |
| 52138603  | CYP4F12 | cytochrome P450 family 4 subfamily F member 12                | -0.241 |
| 25742807  | RASSF5  | Ras association domain family member 5                        | -0.241 |
| 187937143 | C2orf42 | chromosome 2 open reading frame 42                            | -0.241 |
| 57527332  | PSPH    | phosphoserine phosphatase                                     | -0.241 |
| 149018420 | PTH1R   | parathyroid hormone 1 receptor                                | -0.241 |
| 54035529  | SS18    | SS18, nBAF chromatin remodeling complex subunit               | -0.241 |
| 6978513   | APEH    | acylaminoacyl-peptide hydrolase                               | -0.240 |
| 672079582 | N/A     | N/A                                                           | -0.240 |
| 157818959 | KMT5C   | lysine methyltransferase 5C                                   | -0.240 |
| 97537309  | SYNJ1   | synaptojanin 1                                                | -0.240 |
| 511925477 | N/A     | N/A                                                           | -0.240 |
| 12831215  | KCNK10  | potassium two pore domain channel subfamily K member 10       | -0.240 |
| 58865958  | RDH11   | retinol dehydrogenase 11 (all-trans/9-cis/11-cis)             | -0.240 |
| 194473630 | RECQL4  | RecQ like helicase 4                                          | -0.240 |
| 11177910  | HSPA2   | heat shock protein family A (Hsp70) member 2                  | -0.240 |
| 57192     | P3H4    | prolyl 3-hydroxylase family member 4 (non-enzymatic)          | -0.240 |
| 157818257 | SFXN4   | sideroflexin 4                                                | -0.239 |
| 589922499 | N/A     | N/A                                                           | -0.239 |
| 309319799 | EIF2AK4 | eukaryotic translation initiation factor 2 alpha kinase 4     | -0.239 |
| 57527084  | HAT1    | histone acetyltransferase 1                                   | -0.238 |
| 672081577 | N/A     | N/A                                                           | -0.238 |
| 672054612 | FBXO44  | F-box protein 44                                              | -0.238 |
| 157820535 | GATC    | glutamyl-tRNA amidotransferase subunit C                      | -0.238 |
| 564344879 | N/A     | N/A                                                           | -0.237 |
| 149033803 | CDKL2   | cyclin dependent kinase like 2                                | -0.237 |
| 119310200 | KDM4D   | lysine demethylase 4D                                         | -0.237 |
| 157822599 | GSAP    | gamma-secretase activating protein                            | -0.237 |
| 51948438  | PYROXD1 | pyridine nucleotide-disulphide oxidoreductase domain 1        | -0.237 |

|           |          |                                                                              |        |
|-----------|----------|------------------------------------------------------------------------------|--------|
| 158749602 | TRAM1L1  | translocation associated membrane protein 1 like 1                           | -0.237 |
| 291490673 | NGFR     | nerve growth factor receptor                                                 | -0.236 |
| 60359932  | PPM1H    | protein phosphatase, Mg <sup>2+</sup> /Mn <sup>2+</sup> dependent 1H         | -0.236 |
| 449784888 | ALDH5A1  | aldehyde dehydrogenase 5 family member A1                                    | -0.236 |
| 564342542 | MAP1A    | microtubule associated protein 1A                                            | -0.236 |
| 160333179 | FBXO27   | F-box protein 27                                                             | -0.236 |
| 672047003 | CDAN1    | codanin 1                                                                    | -0.236 |
| 56605774  | NFKB2    | nuclear factor kappa B subunit 2                                             | -0.235 |
| 157817480 | RWDD2A   | RWD domain containing 2A                                                     | -0.235 |
| 672014800 | N/A      | N/A                                                                          | -0.235 |
| 157817015 | LDLRAP1  | low density lipoprotein receptor adaptor protein 1                           | -0.234 |
| 564314389 | DZIP3    | DAZ interacting zinc finger protein 3                                        | -0.234 |
| 149016209 | SLC4A3   | solute carrier family 4 member 3                                             | -0.234 |
| 672062815 | N/A      | N/A                                                                          | -0.234 |
| 149066401 | AARD     | alanine and arginine rich domain containing protein                          | -0.234 |
| 40786477  | SNAP47   | synaptosome associated protein 47                                            | -0.234 |
| 77404265  | JAM2     | junctional adhesion molecule 2                                               | -0.233 |
| 157818279 | MMACHC   | methylmalonic aciduria (cobalamin deficiency) cblC type, with homocystinuria | -0.233 |
| 62543563  | KYAT3    | kynurenine aminotransferase 3                                                | -0.233 |
| 62078935  | ALS2CR12 | amyotrophic lateral sclerosis 2 chromosome region 12                         | -0.233 |
| 48040475  | GCNT2    | glucosaminyl (N-acetyl) transferase 2, I-branching enzyme (I blood group)    | -0.233 |
| 584277046 | SLC1A3   | solute carrier family 1 member 3                                             | -0.232 |
| 213688380 | GXYLT1   | glucoside xylosyltransferase 1                                               | -0.232 |
| 149053021 | TMEM107  | transmembrane protein 107                                                    | -0.232 |
| 306482651 | DNAJB14  | DnaJ heat shock protein family (Hsp40) member B14                            | -0.232 |
| 564358836 | NT5DC3   | 5'-nucleotidase domain containing 3                                          | -0.232 |
| 748983393 | ZBTB4    | zinc finger and BTB domain containing 4                                      | -0.232 |
| 594661984 | N/A      | N/A                                                                          | -0.232 |
| 293346766 | TCAF1    | TRPM8 channel associated factor 1                                            | -0.232 |
| 9457244   | RBBP9    | RB binding protein 9, serine hydrolase                                       | -0.231 |
| 13489067  | NSF      | N-ethylmaleimide sensitive factor, vesicle fusing ATPase                     | -0.231 |



|           |          |                                                                   |        |
|-----------|----------|-------------------------------------------------------------------|--------|
| 158749644 | MCM6     | minichromosome maintenance complex component 6                    | -0.231 |
| 149029770 | N/A      | N/A                                                               | -0.231 |
| 157818341 | PPP1R3D  | protein phosphatase 1 regulatory subunit 3D                       | -0.231 |
| 158261984 | PSMG2    | proteasome assembly chaperone 2                                   | -0.231 |
| 149028840 | N/A      | N/A                                                               | -0.230 |
| 30025028  | AMIGO3   | adhesion molecule with Ig like domain 3                           | -0.230 |
| 56605668  | FLII     | FLII, actin remodeling protein                                    | -0.230 |
| 157817839 | SEMA5A   | semaphorin 5A                                                     | -0.230 |
| 564322686 | N/A      | N/A                                                               | -0.230 |
| 197927216 | TBC1D5   | TBC1 domain family member 5                                       | -0.230 |
| 157820653 | TMEM63C  | transmembrane protein 63C                                         | -0.229 |
| 81884455  | PDE12    | phosphodiesterase 12                                              | -0.229 |
| 73661200  | SPRN     | shadow of prion protein                                           | -0.229 |
| 13994225  | HSD17B10 | hydroxysteroid 17-beta dehydrogenase 10                           | -0.229 |
| 634833336 | N/A      | N/A                                                               | -0.229 |
| 404434384 | GALNT11  | polypeptide N-acetylgalactosaminyltransferase 11                  | -0.229 |
| 564397761 | GCC2     | GRIP and coiled-coil domain containing 2                          | -0.229 |
| 300797244 | RHBDD2   | rhomboid domain containing 2                                      | -0.229 |
| 8393355   | FDX1     | ferredoxin 1                                                      | -0.229 |
| 58865718  | HERC4    | HECT and RLD domain containing E3 ubiquitin protein ligase 4      | -0.228 |
| 12248187  | P2RY12   | purinergic receptor P2Y12                                         | -0.228 |
| 392334157 | SEMA6A   | semaphorin 6A                                                     | -0.228 |
| 672084703 | N/A      | N/A                                                               | -0.228 |
| 149062310 | BSCL2    | BSCL2, seipin lipid droplet biogenesis associated                 | -0.228 |
| 62655853  | TELO2    | telomere maintenance 2                                            | -0.228 |
| 62079099  | ORC5     | origin recognition complex subunit 5                              | -0.228 |
| 564389730 | PLAT     | plasminogen activator, tissue type                                | -0.228 |
| 281485606 | STT3B    | STT3B, catalytic subunit of the oligosaccharyltransferase complex | -0.228 |
| 54312088  | ATP2B4   | ATPase plasma membrane Ca <sup>2+</sup> transporting 4            | -0.228 |
| 157818709 | TMEM205  | transmembrane protein 205                                         | -0.227 |
| 731267527 | N/A      | N/A                                                               | -0.227 |
| 403259801 | N/A      | N/A                                                               | -0.227 |
| 149033235 | PYURF    | PIGY upstream reading frame                                       | -0.227 |
| 51948524  | IGFBP4   | insulin like growth factor binding protein 4                      | -0.226 |
| 672050038 | NDNF     | neuron derived neurotrophic factor                                | -0.226 |

|           |         |                                                                    |        |
|-----------|---------|--------------------------------------------------------------------|--------|
| 56799390  | ATP1B2  | ATPase Na <sup>+</sup> /K <sup>+</sup> transporting subunit beta 2 | -0.226 |
| 564384526 | TACC3   | transforming acidic coiled-coil containing protein 3               | -0.226 |
| 672072960 | KNTC1   | kinetochore associated 1                                           | -0.226 |
| 160406706 | SH3GL3  | SH3 domain containing GRB2 like 3, endophilin A3                   | -0.226 |
| 205277356 | TVP23B  | trans-golgi network vesicle protein 23 homolog B                   | -0.226 |
| 62079015  | FAM213A | family with sequence similarity 213 member A                       | -0.226 |
| 157819139 | PITRM1  | pitrilysin metallopeptidase 1                                      | -0.226 |
| 157817710 | FER     | FER tyrosine kinase                                                | -0.225 |
| 62078843  | TMEM209 | transmembrane protein 209                                          | -0.225 |
| 293345175 | DHX29   | DExH-box helicase 29                                               | -0.225 |
| 13592117  | KLF10   | Kruppel like factor 10                                             | -0.225 |
| 399154129 | POP5    | POP5 homolog, ribonuclease P/MRP subunit                           | -0.225 |
| 62078989  | CCDC181 | coiled-coil domain containing 181                                  | -0.225 |
| 672055862 | N/A     | N/A                                                                | -0.225 |
| 564383995 | EVC     | EvC ciliary complex subunit 1                                      | -0.225 |
| 157819921 | ZNF385B | zinc finger protein 385B                                           | -0.224 |
| 61557398  | ZDHHC12 | zinc finger DHHC-type containing 12                                | -0.224 |
| 672048013 | N/A     | N/A                                                                | -0.224 |
| 25742576  | NXF1    | nuclear RNA export factor 1                                        | -0.224 |
| 112983748 | VSIR    | V-set immunoregulatory receptor                                    | -0.223 |
| 157818897 | VANGL1  | VANGL planar cell polarity protein 1                               | -0.223 |
| 13928806  | P2RX4   | purinergic receptor P2X 4                                          | -0.223 |
| 157818805 | DCLRE1A | DNA cross-link repair 1A                                           | -0.223 |
| 672040941 | ATRNL1  | attractin like 1                                                   | -0.223 |
| 392348438 | NIPAL3  | NIPA like domain containing 3                                      | -0.223 |
| 155369680 | Ces2b   | carboxyesterase 2B                                                 | -0.222 |
| 148697866 | FAM3A   | family with sequence similarity 3 member A                         | -0.222 |
| 209529673 | PLEKHG2 | pleckstrin homology and RhoGEF domain containing G2                | -0.222 |
| 157786994 | C1orf21 | chromosome 1 open reading frame 21                                 | -0.222 |
| 157818283 | UQCC2   | ubiquinol-cytochrome c reductase complex assembly factor 2         | -0.222 |
| 157820311 | OTUD6B  | OTU domain containing 6B                                           | -0.222 |
| 913512216 | N/A     | N/A                                                                | -0.222 |
| 672037313 | N/A     | N/A                                                                | -0.222 |
| 78369663  | SLC38A9 | solute carrier family 38 member 9                                  | -0.222 |
| 533133321 | N/A     | N/A                                                                | -0.222 |

|           |          |                                                                   |        |
|-----------|----------|-------------------------------------------------------------------|--------|
| 148689145 | CPNE4    | copine 4                                                          | -0.222 |
| 149061976 | N/A      | N/A                                                               | -0.222 |
| 74179798  | PCSK2    | proprotein convertase subtilisin/kexin type 2                     | -0.221 |
| 158711736 | SMC2     | structural maintenance of chromosomes 2                           | -0.221 |
| 62945338  | EIF2D    | eukaryotic translation initiation factor 2D                       | -0.221 |
| 56605770  | RRP8     | ribosomal RNA processing 8                                        | -0.221 |
| 197927172 | ZMAT4    | zinc finger matrin-type 4                                         | -0.221 |
| 61557009  | SNAPC2   | small nuclear RNA activating complex polypeptide 2                | -0.221 |
| 564342402 | PLA2G4B  | phospholipase A2 group IVB                                        | -0.221 |
| 149067833 | ALDOA    | aldolase, fructose-bisphosphate A                                 | -0.221 |
| 148695758 | CAPRN1   | cell cycle associated protein 1                                   | -0.221 |
| 197246365 | SP2      | Sp2 transcription factor                                          | -0.220 |
| 197927395 | CCDC40   | coiled-coil domain containing 40                                  | -0.220 |
| 296010823 | UBR1     | ubiquitin protein ligase E3 component n-recognin 1                | -0.220 |
| 157819361 | TTYH1    | tweety family member 1                                            | -0.220 |
| 158631207 | YIF1A    | Yip1 interacting factor homolog A, membrane trafficking protein   | -0.220 |
| 672042001 | PLD1     | phospholipase D1                                                  | -0.220 |
| 157823887 | MLC1     | megalencephalic leukoencephalopathy with subcortical cysts 1      | -0.220 |
| 402766107 | ALDH7A1  | aldehyde dehydrogenase 7 family member A1                         | -0.220 |
| 148690402 | SLC9A3R2 | SLC9A3 regulator 2                                                | -0.220 |
| 158186672 | Nedd4    | neural precursor cell expressed, developmentally down-regulated 4 | -0.220 |
| 564378945 | N/A      | N/A                                                               | -0.219 |
| 57527353  | TOR3A    | torsin family 3 member A                                          | -0.219 |
| 672017118 | N/A      | N/A                                                               | -0.219 |
| 564306838 | ZNF512   | zinc finger protein 512                                           | -0.219 |
| 157822873 | FBXO18   | F-box protein, helicase, 18                                       | -0.219 |
| 672061591 | N/A      | N/A                                                               | -0.219 |
| 402794954 | MINK1    | misshapen like kinase 1                                           | -0.219 |
| 5174513   | SMAD3    | SMAD family member 3                                              | -0.219 |
| 564307561 | RPS6KL1  | ribosomal protein S6 kinase like 1                                | -0.218 |
| 62079019  | UFSP2    | UFM1 specific peptidase 2                                         | -0.218 |
| 9506469   | CD47     | CD47 molecule                                                     | -0.218 |
| 564387660 | UBAC2    | UBA domain containing 2                                           | -0.217 |
| 564315812 | NAV1     | neuron navigator 1                                                | -0.217 |

|           |                   |                                                                              |        |
|-----------|-------------------|------------------------------------------------------------------------------|--------|
| 564333746 | MMS19             | MMS19 homolog, cytosolic iron-sulfur assembly component                      | -0.217 |
| 157817500 | UBAP2             | ubiquitin associated protein 2                                               | -0.217 |
| 148666837 | MGLL              | monoglyceride lipase                                                         | -0.217 |
| 148697324 | DEPTOR            | DEP domain containing MTOR interacting protein                               | -0.216 |
| 913495139 | N/A               | N/A                                                                          | -0.216 |
| 348605146 | HDAC11            | histone deacetylase 11                                                       | -0.216 |
| 148671603 | LRP11             | LDL receptor related protein 11                                              | -0.216 |
| 564298436 | WDR11             | WD repeat domain 11                                                          | -0.216 |
| 155369305 | PBXIP1            | PBX homeobox interacting protein 1                                           | -0.216 |
| 344255506 | N/A               | N/A                                                                          | -0.216 |
| 157821397 | SLC22A15          | solute carrier family 22 member 15                                           | -0.216 |
| 564333977 | Cnm1              | cyclin and CBS domain divalent metal cation transport mediator 1             | -0.216 |
| 9506425   | BET1              | Bet1 golgi vesicular membrane trafficking protein                            | -0.215 |
| 6978890   | GGH               | gamma-glutamyl hydrolase                                                     | -0.215 |
| 880921412 | N/A               | N/A                                                                          | -0.215 |
| 564344397 | TOMM34            | translocase of outer mitochondrial membrane 34                               | -0.215 |
| 157821513 | HEBP1             | heme binding protein 1                                                       | -0.215 |
| 672088490 | N/A               | N/A                                                                          | -0.215 |
| 38174623  | FXYP7             | FXYP domain containing ion transport regulator 7                             | -0.215 |
| 148687519 | CALN1             | calneuron 1                                                                  | -0.214 |
| 300793998 | SHISA6            | shisa family member 6                                                        | -0.214 |
| 672055565 | OTOF              | otoferlin                                                                    | -0.214 |
| 288541382 | DIS3L2            | DIS3 like 3'-5' exoribonuclease 2                                            | -0.214 |
| 8393643   | KCNAB1            | potassium voltage-gated channel subfamily A member regulatory beta subunit 1 | -0.214 |
| 564382871 | N/A               | N/A                                                                          | -0.214 |
| 149028347 | LIG1              | DNA ligase 1                                                                 | -0.214 |
| 672083376 | N/A               | N/A                                                                          | -0.213 |
| 51948390  | HSD17B11          | hydroxysteroid 17-beta dehydrogenase 11                                      | -0.213 |
| 157819089 | CXorf40A/CXorf40B | chromosome X open reading frame 40A                                          | -0.213 |
| 205755    | TAGLN3            | transgelin 3                                                                 | -0.213 |
| 58865418  | SUGP1             | SURP and G-patch domain containing 1                                         | -0.213 |
| 807677    | N/A               | N/A                                                                          | -0.213 |

|           |           |                                                    |        |
|-----------|-----------|----------------------------------------------------|--------|
| 568986622 | CNIH1     | cornichon family AMPA receptor auxiliary protein 1 | -0.213 |
| 564398053 | MAN1A1    | mannosidase alpha class 1A member 1                | -0.213 |
| 157817061 | SIAE      | sialic acid acetyltransferase                      | -0.213 |
| 827475641 | CCDC151   | coiled-coil domain containing 151                  | -0.213 |
| 57526927  | LARS      | leucyl-tRNA synthetase                             | -0.213 |
| 157952208 | BAG1      | BCL2 associated athanogene 1                       | -0.212 |
| 29789305  | PTPRN     | protein tyrosine phosphatase, receptor type N      | -0.212 |
| 672066638 | CLEC16A   | C-type lectin domain containing 16A                | -0.212 |
| 564397593 | RAB36     | RAB36, member RAS oncogene family                  | -0.212 |
| 149066531 | VPS13B    | vacuolar protein sorting 13 homolog B              | -0.212 |
| 392338550 | IPO11     | importin 11                                        | -0.212 |
| 664703981 | N/A       | N/A                                                | -0.212 |
| 672051730 | N/A       | N/A                                                | -0.212 |
| 149056788 | VASP      | vasodilator stimulated phosphoprotein              | -0.211 |
| 564335892 | PEX2      | peroxisomal biogenesis factor 2                    | -0.211 |
| 187282043 | TMEM179   | transmembrane protein 179                          | -0.211 |
| 13928780  | POR       | cytochrome p450 oxidoreductase                     | -0.211 |
| 635049334 | N/A       | N/A                                                | -0.211 |
| 415703079 | NEBL      | nebulette                                          | -0.211 |
| 158635998 | SLC40A1   | solute carrier family 40 member 1                  | -0.211 |
| 25742763  | HSPA5     | heat shock protein family A (Hsp70) member 5       | -0.211 |
| 157786612 | B9D1      | B9 domain containing 1                             | -0.211 |
| 158749540 | NPEPPS    | aminopeptidase puromycin sensitive                 | -0.210 |
| 18959250  | PRKCD     | protein kinase C delta                             | -0.210 |
| 281306814 | RPS6KA2   | ribosomal protein S6 kinase A2                     | -0.210 |
| 76096338  | ZEB2      | zinc finger E-box binding homeobox 2               | -0.210 |
| 765067    | PIM2      | Pim-2 proto-oncogene, serine/threonine kinase      | -0.209 |
| 564386387 | EEF1AKMT1 | EEF1A lysine methyltransferase 1                   | -0.209 |
| 281371490 | LAMC1     | laminin subunit gamma 1                            | -0.209 |
| 164414419 | SP1       | Sp1 transcription factor                           | -0.209 |
| 747811827 | HID1      | HID1 domain containing                             | -0.208 |
| 880942118 | N/A       | N/A                                                | -0.208 |
| 149058126 | ALDH9A1   | aldehyde dehydrogenase 9 family member A1          | -0.208 |
| 19705535  | PACS1     | phosphofurin acidic cluster sorting protein 1      | -0.208 |
| 61557385  | RNASEH2A  | ribonuclease H2 subunit A                          | -0.207 |
| 157822271 | DOLK      | dolichol kinase                                    | -0.207 |
| 672065543 | TNS1      | tensin 1                                           | -0.207 |
| 37359962  | PLPPR4    | phospholipid phosphatase related 4                 | -0.207 |
| 398303848 | RNH1      | ribonuclease/angiogenin inhibitor 1                | -0.207 |

|           |          |                                                                  |        |
|-----------|----------|------------------------------------------------------------------|--------|
| 225543229 | TIAM1    | T cell lymphoma invasion and metastasis 1                        | -0.207 |
| 148667192 | LRTM2    | leucine rich repeats and transmembrane domains 2                 | -0.207 |
| 1335860   | PRKAG1   | protein kinase AMP-activated non-catalytic subunit gamma 1       | -0.207 |
| 564385704 | FLNB     | filamin B                                                        | -0.207 |
| 300798704 | TLL2     | tolloid like 2                                                   | -0.206 |
| 62078695  | MLEC     | malectin                                                         | -0.206 |
| 39104626  | CAMK2A   | calcium/calmodulin dependent protein kinase II alpha             | -0.206 |
| 157823243 | FAM172A  | family with sequence similarity 172 member A                     | -0.206 |
| 155369301 | ARHGEF37 | Rho guanine nucleotide exchange factor 37                        | -0.206 |
| 564372562 | PFAS     | phosphoribosylformylglycinamide synthase                         | -0.206 |
| 18266704  | TRPC5    | transient receptor potential cation channel subfamily C member 5 | -0.206 |
| 300794237 | LIMCH1   | LIM and calponin homology domains 1                              | -0.205 |
| 402794666 | NRG1     | neuregulin 1                                                     | -0.205 |
| 149048608 | N/A      | N/A                                                              | -0.205 |
| 755540019 | N/A      | N/A                                                              | -0.205 |
| 9506523   | CSPG5    | chondroitin sulfate proteoglycan 5                               | -0.205 |
| 54019432  | PCDHA7   | protocadherin alpha 7                                            | -0.205 |
| 31377525  | ASL      | argininosuccinate lyase                                          | -0.205 |
| 206558322 | JMJD8    | jumonji domain containing 8                                      | -0.205 |
| 403310680 | GAMT     | guanidinoacetate N-methyltransferase                             | -0.205 |
| 6978673   | CNR1     | cannabinoid receptor 1                                           | -0.205 |
| 13540703  | PDE1A    | phosphodiesterase 1A                                             | -0.205 |
| 40786489  | ARHGEF25 | Rho guanine nucleotide exchange factor 25                        | -0.204 |
| 564343174 | PLCB4    | phospholipase C beta 4                                           | -0.204 |
| 6981504   | ATXN1    | ataxin 1                                                         | -0.204 |
| 188536071 | DLC1     | DLC1 Rho GTPase activating protein                               | -0.204 |
| 564361015 | TRIOBP   | TRIO and F-actin binding protein                                 | -0.204 |
| 149018602 | HYAL1    | hyaluronoglucosaminidase 1                                       | -0.204 |
| 157818191 | SETD6    | SET domain containing 6                                          | -0.203 |
| 148747414 | GDA      | guanine deaminase                                                | -0.203 |
| 564391231 | SERPINB9 | serpin family B member 9                                         | -0.203 |
| 18426866  | ACAA2    | acetyl-CoA acyltransferase 2                                     | -0.203 |
| 149020512 | PDE4A    | phosphodiesterase 4A                                             | -0.203 |
| 568971594 | GABRA1   | gamma-aminobutyric acid type A receptor alpha1 subunit           | -0.203 |
| 56605780  | PMVK     | phosphomevalonate kinase                                         | -0.203 |

|           |               |                                                                                      |        |
|-----------|---------------|--------------------------------------------------------------------------------------|--------|
| 13027430  | WDR7          | WD repeat domain 7                                                                   | -0.202 |
| 205277353 | TRIM16        | tripartite motif containing 16                                                       | -0.202 |
| 149044030 | JAG2          | jagged 2                                                                             | -0.202 |
| 142385975 | RNF25         | ring finger protein 25                                                               | -0.202 |
| 149046617 | MAGI2         | membrane associated guanylate kinase, WW and PDZ domain containing 2                 | -0.202 |
| 451770389 | HMGCLL1       | 3-hydroxymethyl-3-methylglutaryl-CoA lyase like 1                                    | -0.202 |
| 148696104 | CKMT1A/CKMT1B | creatine kinase, mitochondrial 1B                                                    | -0.202 |
| 310750417 | FAM98C        | family with sequence similarity 98 member C                                          | -0.202 |
| 55741502  | ACAT2         | acetyl-CoA acetyltransferase 2                                                       | -0.202 |
| 672049447 | N/A           | N/A                                                                                  | -0.202 |
| 198278430 | OSBPL9        | oxysterol binding protein like 9                                                     | -0.202 |
| 293340174 | DNAH9         | dynein axonemal heavy chain 9                                                        | -0.202 |
| 594062377 | N/A           | N/A                                                                                  | -0.202 |
| 48675867  | PLPP3         | phospholipid phosphatase 3                                                           | -0.201 |
| 157786582 | C16orf89      | chromosome 16 open reading frame 89                                                  | -0.201 |
| 148693894 | UBE2Q2        | ubiquitin conjugating enzyme E2 Q2                                                   | -0.201 |
| 188536087 | FAM103A1      | family with sequence similarity 103 member A1                                        | -0.201 |
| 68163417  | FAHD1         | fumarylacetoacetate hydrolase domain containing 1                                    | -0.201 |
| 309243082 | PTPRJ         | protein tyrosine phosphatase, receptor type J                                        | -0.201 |
| 38454284  | PPM1E         | protein phosphatase, Mg <sup>2+</sup> /Mn <sup>2+</sup> dependent 1E                 | -0.201 |
| 148707634 | SHISA4        | shisa family member 4                                                                | -0.201 |
| 157786976 | RGL1          | ral guanine nucleotide dissociation stimulator like 1                                | -0.201 |
| 149053315 | CAMKK1        | calcium/calmodulin dependent protein kinase kinase 1                                 | -0.200 |
| 148664829 | NMRAL1        | NmrA like redox sensor 1                                                             | -0.200 |
| 149033449 | RGD1559747    | similar to Zinc finger and SCAN domain containing protein 2 (Zinc finger protein 29) | -0.200 |
| 46485382  | BHLHB9        | basic helix-loop-helix family member b9                                              | -0.200 |
| 564387864 | CACNA1D       | calcium voltage-gated channel subunit alpha 1 D                                      | -0.199 |
| 564354247 | NPHP4         | nephrocystin 4                                                                       | -0.199 |
| 62078801  | MEF2A         | myocyte enhancer factor 2A                                                           | -0.199 |
| 77404395  | SND1          | staphylococcal nuclease and tudor domain containing 1                                | -0.199 |
| 564397109 | N/A           | N/A                                                                                  | -0.199 |

|           |              |                                                                    |        |
|-----------|--------------|--------------------------------------------------------------------|--------|
| 586975177 | N/A          | N/A                                                                | -0.199 |
| 148667088 | ATP2B2       | ATPase plasma membrane Ca <sup>2+</sup> transporting 2             | -0.199 |
| 148690392 | N/A          | N/A                                                                | -0.199 |
| 189163499 | CYHR1        | cysteine and histidine rich 1                                      | -0.198 |
| 61556891  | OSBPL2       | oxysterol binding protein like 2                                   | -0.198 |
| 16758726  | SLC17A7      | solute carrier family 17 member 7                                  | -0.198 |
| 451172098 | KCTD1        | potassium channel tetramerization domain containing 1              | -0.197 |
| 149024371 | SH2D5        | SH2 domain containing 5                                            | -0.197 |
| 672089580 | LOC103694865 | TATA-binding protein-associated factor 2N-like                     | -0.197 |
| 26006243  | KCND2        | potassium voltage-gated channel subfamily D member 2               | -0.197 |
| 880871034 | N/A          | N/A                                                                | -0.196 |
| 170671744 | Mapk1ip1     | mitogen-activated protein kinase 1 interacting protein 1           | -0.196 |
| 9506913   | Ndufs6       | NADH:ubiquinone oxidoreductase subunit S6                          | -0.196 |
| 149062285 | N/A          | N/A                                                                | -0.195 |
| 62738001  | N/A          | N/A                                                                | -0.195 |
| 149016262 | Col4a4       | collagen type IV alpha 4 chain                                     | -0.195 |
| 913505527 | N/A          | N/A                                                                | -0.195 |
| 11560055  | KHDRBS3      | KH RNA binding domain containing, signal transduction associated 3 | -0.195 |
| 157820339 | MESP2        | mesoderm posterior bHLH transcription factor 2                     | -0.195 |
| 12018246  | TSPAN2       | tetraspanin 2                                                      | -0.195 |
| 564334053 | SORCS1       | sortilin related VPS10 domain containing receptor 1                | -0.195 |
| 564347675 | AAK1         | AP2 associated kinase 1                                            | -0.195 |
| 149025317 | N/A          | N/A                                                                | -0.195 |
| 58865716  | PPP1R3C      | protein phosphatase 1 regulatory subunit 3C                        | -0.194 |
| 32527705  | N/A          | N/A                                                                | -0.194 |
| 13591979  | LIFR         | LIF receptor alpha                                                 | -0.194 |
| 157818397 | MFSD4A       | major facilitator superfamily domain containing 4A                 | -0.194 |
| 840088206 | INTS11       | integrator complex subunit 11                                      | -0.194 |
| 149018361 | N/A          | N/A                                                                | -0.194 |
| 32423788  | Sept4        | septin 4                                                           | -0.194 |
| 568941844 | IQSEC3       | IQ motif and Sec7 domain 3                                         | -0.194 |
| 11072106  | NUCB2        | nucleobindin 2                                                     | -0.193 |



|           |                          |                                                                        |        |
|-----------|--------------------------|------------------------------------------------------------------------|--------|
| 283046651 | PTPRZ1                   | protein tyrosine phosphatase, receptor type Z1                         | -0.193 |
| 123780073 | YOD1                     | YOD1 deubiquitinase                                                    | -0.193 |
| 157818293 | MMAA                     | methylmalonic aciduria (cobalamin deficiency) cblA type                | -0.193 |
| 564332776 | LRRN4CL                  | LRRN4 C-terminal like                                                  | -0.193 |
| 564325125 | PLEKHG1                  | pleckstrin homology and RhoGEF domain containing G1                    | -0.193 |
| 201025388 | MPLKIP                   | M-phase specific PLK1 interacting protein                              | -0.193 |
| 62079143  | YIPF2                    | Yip1 domain family member 2                                            | -0.192 |
| 752420454 | N/A                      | N/A                                                                    | -0.192 |
| 63706033  | Gm5174 (includes others) | serine/threonine kinase, pseudogene 1                                  | -0.192 |
| 198278525 | RIC8A                    | RIC8 guanine nucleotide exchange factor A                              | -0.192 |
| 62078931  | PAQR8                    | progesterin and adipoQ receptor family member 8                        | -0.192 |
| 157823930 | PPP2R5A                  | protein phosphatase 2 regulatory subunit B'alpha                       | -0.192 |
| 431900674 | N/A                      | N/A                                                                    | -0.192 |
| 206725437 | LRRC23                   | leucine rich repeat containing 23                                      | -0.192 |
| 672078392 | N/A                      | N/A                                                                    | -0.192 |
| 13591963  | GRM7                     | glutamate metabotropic receptor 7                                      | -0.191 |
| 56090379  | POMGNT1                  | protein O-linked mannose N-acetylglucosaminyltransferase 1 (beta 1,2-) | -0.191 |
| 17530977  | ECHS1                    | enoyl-CoA hydratase, short chain 1                                     | -0.191 |
| 157822043 | PLGRKT                   | plasminogen receptor with a C-terminal lysine                          | -0.191 |
| 157820155 | MRPL32                   | mitochondrial ribosomal protein L32                                    | -0.191 |
| 157821335 | GPR162                   | G protein-coupled receptor 162                                         | -0.191 |
| 25282457  | CCNB1                    | cyclin B1                                                              | -0.191 |
| 564345393 | PRKAG2                   | protein kinase AMP-activated non-catalytic subunit gamma 2             | -0.190 |
| 672055089 | N/A                      | N/A                                                                    | -0.190 |
| 564372825 | SGSM2                    | small G protein signaling modulator 2                                  | -0.190 |
| 18266684  | MSMO1                    | methylsterol monooxygenase 1                                           | -0.190 |
| 149027971 | ATF6B                    | activating transcription factor 6 beta                                 | -0.189 |
| 293349793 | RFTN2                    | raftlin family member 2                                                | -0.189 |
| 672069941 | N/A                      | N/A                                                                    | -0.189 |
| 148696094 | TUBGCP4                  | tubulin gamma complex associated protein 4                             | -0.189 |
| 568950414 | ATXN2L                   | ataxin 2 like                                                          | -0.189 |
| 201066342 | MAN2B2                   | mannosidase alpha class 2B member 2                                    | -0.189 |
| 42491372  | ERMP1                    | endoplasmic reticulum metalloproteinase 1                              | -0.189 |
| 6981112   | IVD                      | isovaleryl-CoA dehydrogenase                                           | -0.189 |

|           |                 |                                                                  |        |
|-----------|-----------------|------------------------------------------------------------------|--------|
| 655718534 | N/A             | N/A                                                              | -0.189 |
| 564342864 | FAHD2B          | fumarylacetoacetate hydrolase domain containing 2B               | -0.189 |
| 6760457   | TIMM22          | translocase of inner mitochondrial membrane 22                   | -0.189 |
| 62079155  | DALRD3          | DALR anticodon binding domain containing 3                       | -0.189 |
| 157819187 | AGL             | amylo-alpha-1, 6-glucosidase, 4-alpha-glucanotransferase         | -0.189 |
| 72255531  | EFHD2           | EF-hand domain family member D2                                  | -0.189 |
| 564384429 | N/A             | N/A                                                              | -0.189 |
| 157822625 | USP28           | ubiquitin specific peptidase 28                                  | -0.188 |
| 157818171 | PLK4            | polo like kinase 4                                               | -0.188 |
| 564361228 | TTL1            | tubulin tyrosine ligase like 1                                   | -0.187 |
| 209413784 | PRAMEF7/PRAMEF8 | PRAME family member 7                                            | -0.187 |
| 157822211 | CTC1            | CST telomere replication complex component 1                     | -0.187 |
| 149063212 | TMEM132C        | transmembrane protein 132C                                       | -0.187 |
| 157823948 | ANO6            | anoctamin 6                                                      | -0.187 |
| 68163551  | TBC1D22B        | TBC1 domain family member 22B                                    | -0.187 |
| 564334013 | GBF1            | golgi brefeldin A resistant guanine nucleotide exchange factor 1 | -0.187 |
| 564399352 | TAF9B           | TATA-box binding protein associated factor 9b                    | -0.187 |
| 815891121 | ZEB1            | zinc finger E-box binding homeobox 1                             | -0.187 |
| 149040053 | C3orf14         | chromosome 3 open reading frame 14                               | -0.187 |
| 564382208 | Gpatch2         | G patch domain containing 2                                      | -0.187 |
| 300794608 | CEP120          | centrosomal protein 120                                          | -0.186 |
| 157821901 | PNMA3           | PNMA family member 3                                             | -0.186 |
| 672088942 | ATP2B3          | ATPase plasma membrane Ca <sup>2+</sup> transporting 3           | -0.186 |
| 19705437  | EPHA7           | EPH receptor A7                                                  | -0.186 |
| 149046124 | SPATS2L         | spermatogenesis associated serine rich 2 like                    | -0.186 |
| 169234826 | ELP4            | elongator acetyltransferase complex subunit 4                    | -0.186 |
| 219803038 | PDE2A           | phosphodiesterase 2A                                             | -0.186 |
| 312283667 | WNK1            | WNK lysine deficient protein kinase 1                            | -0.185 |
| 197209847 | JAK1            | Janus kinase 1                                                   | -0.185 |
| 59891444  | FUT10           | fucosyltransferase 10                                            | -0.185 |
| 149022123 | N/A             | N/A                                                              | -0.185 |
| 52138739  | HEXA            | hexosaminidase subunit alpha                                     | -0.185 |
| 674093471 | N/A             | N/A                                                              | -0.185 |
| 285026506 | IDUA            | iduronidase, alpha-L-                                            | -0.185 |
| 16923964  | CNTN1           | contactin 1                                                      | -0.185 |

|           |                 |                                                         |        |
|-----------|-----------------|---------------------------------------------------------|--------|
| 38051886  | RABGGTB         | Rab geranylgeranyltransferase beta subunit              | -0.185 |
| 77628016  | BAIAP2L1        | BAI1 associated protein 2 like 1                        | -0.185 |
| 859783782 | N/A             | N/A                                                     | -0.185 |
| 149064529 | N/A             | N/A                                                     | -0.185 |
| 300797496 | TDRD6           | tudor domain containing 6                               | -0.184 |
| 564333197 | TJP2            | tight junction protein 2                                | -0.184 |
| 157787095 | MIP             | major intrinsic protein of lens fiber                   | -0.184 |
| 157822539 | ANK1            | ankyrin 1                                               | -0.184 |
| 112984202 | FZD8            | frizzled class receptor 8                               | -0.183 |
| 17865335  | DGAT1           | diacylglycerol O-acyltransferase 1                      | -0.183 |
| 731277128 | N/A             | N/A                                                     | -0.183 |
| 157820421 | SMIM17          | small integral membrane protein 17                      | -0.183 |
| 157817420 | NRIP3           | nuclear receptor interacting protein 3                  | -0.183 |
| 564313504 | TEX2            | testis expressed 2                                      | -0.183 |
| 76881830  | Kcnp2           | Kv channel-interacting protein 2                        | -0.183 |
| 300796855 | PARD3B          | par-3 family cell polarity regulator beta               | -0.183 |
| 296010825 | UBR2            | ubiquitin protein ligase E3 component n-recogin 2       | -0.182 |
| 56605704  | SERINC3         | serine incorporator 3                                   | -0.182 |
| 56605784  | MRRF            | mitochondrial ribosome recycling factor                 | -0.182 |
| 62078977  | PDIA5           | protein disulfide isomerase family A member 5           | -0.182 |
| 148699026 | N/A             | N/A                                                     | -0.182 |
| 84490431  | DNM3            | dynamamin 3                                             | -0.182 |
| 392343399 | COL4A6          | collagen type IV alpha 6 chain                          | -0.182 |
| 71037403  | MYL12B          | myosin light chain 12B                                  | -0.181 |
| 149036441 | SUCLG1          | succinate-CoA ligase alpha subunit                      | -0.181 |
| 83415090  | RAB2B           | RAB2B, member RAS oncogene family                       | -0.181 |
| 32185285  | BCL2L2          | BCL2 like 2                                             | -0.181 |
| 555987896 | N/A             | N/A                                                     | -0.181 |
| 157817620 | PSD2            | pleckstrin and Sec7 domain containing 2                 | -0.180 |
| 12621120  | SFXN3           | sideroflexin 3                                          | -0.180 |
| 672088357 | ZCCHC18         | zinc finger CCHC-type containing 18                     | -0.180 |
| 19173794  | LOC678813/Marf1 | similar to limkain b1                                   | -0.180 |
| 9506957   | PCSK7           | proprotein convertase subtilisin/kexin type 7           | -0.180 |
| 187468990 | DNAJB2          | DnaJ heat shock protein family (Hsp40) member B2        | -0.180 |
| 39930507  | KCNK15          | potassium two pore domain channel subfamily K member 15 | -0.180 |
| 201025393 | TTC7A           | tetratricopeptide repeat domain 7A                      | -0.180 |
| 640833971 | N/A             | N/A                                                     | -0.180 |

|           |          |                                                                  |        |
|-----------|----------|------------------------------------------------------------------|--------|
| 13592087  | SOAT1    | sterol O-acyltransferase 1                                       | -0.180 |
| 149051484 | AKAP5    | A-kinase anchoring protein 5                                     | -0.180 |
| 946639423 | N/A      | N/A                                                              | -0.179 |
| 169642755 | Pms2     | PMS1 homolog 2, mismatch repair system component                 | -0.179 |
| 564361005 | PLA2G6   | phospholipase A2 group VI                                        | -0.179 |
| 195972823 | TMEM181  | transmembrane protein 181                                        | -0.179 |
| 255683359 | FBXL17   | F-box and leucine rich repeat protein 17                         | -0.179 |
| 564396135 | KIAA0513 | KIAA0513                                                         | -0.178 |
| 672042162 | TRPC3    | transient receptor potential cation channel subfamily C member 3 | -0.178 |
| 13929208  | Scd2     | stearoyl-Coenzyme A desaturase 2                                 | -0.178 |
| 66730413  | FARSA    | phenylalanyl-tRNA synthetase alpha subunit                       | -0.178 |
| 6981672   | Tpm4     | tropomyosin 4                                                    | -0.178 |
| 293349000 | ARHGAP42 | Rho GTPase activating protein 42                                 | -0.178 |
| 16758644  | TXN      | thioredoxin                                                      | -0.178 |
| 13569846  | PARVA    | parvin alpha                                                     | -0.178 |
| 156139151 | PDS5B    | PDS5 cohesin associated factor B                                 | -0.177 |
| 8393060   | Cacnb1   | calcium voltage-gated channel auxiliary subunit beta 1           | -0.177 |
| 672029737 | N/A      | N/A                                                              | -0.177 |
| 564368926 | N/A      | N/A                                                              | -0.177 |
| 62955040  | ELMOD3   | ELMO domain containing 3                                         | -0.177 |
| 672017219 | ZNF106   | zinc finger protein 106                                          | -0.177 |
| 18677755  | ADGRL3   | adhesion G protein-coupled receptor L3                           | -0.177 |
| 564363914 | CLK3     | CDC like kinase 3                                                | -0.177 |
| 201023331 | MAPK11   | mitogen-activated protein kinase 11                              | -0.176 |
| 564390898 | KIF13A   | kinesin family member 13A                                        | -0.176 |
| 157818193 | TTPAL    | alpha tocopherol transfer protein like                           | -0.176 |
| 281306738 | PCDH19   | protocadherin 19                                                 | -0.176 |
| 537235061 | N/A      | N/A                                                              | -0.176 |
| 166063985 | PKN1     | protein kinase N1                                                | -0.175 |
| 149049332 | TULP3    | tubby like protein 3                                             | -0.175 |
| 392334416 | TCF25    | transcription factor 25                                          | -0.175 |
| 157821497 | NDUFS8   | NADH:ubiquinone oxidoreductase core subunit S8                   | -0.175 |
| 8394091   | PSME2    | proteasome activator subunit 2                                   | -0.175 |
| 78000203  | Tpm1     | tropomyosin 1, alpha                                             | -0.174 |
| 667287162 | N/A      | N/A                                                              | -0.174 |
| 392352553 | RBM19    | RNA binding motif protein 19                                     | -0.174 |

|           |          |                                                                         |        |
|-----------|----------|-------------------------------------------------------------------------|--------|
| 194240569 | TRMT44   | tRNA methyltransferase 44 homolog                                       | -0.174 |
| 672062144 | FAM219B  | family with sequence similarity 219 member B                            | -0.174 |
| 61557085  | SPTBN1   | spectrin beta, non-erythrocytic 1                                       | -0.174 |
| 392333710 | COL4A2   | collagen type IV alpha 2 chain                                          | -0.173 |
| 397357    | N/A      | N/A                                                                     | -0.173 |
| 837798914 | N/A      | N/A                                                                     | -0.173 |
| 564395567 | NFATC3   | nuclear factor of activated T cells 3                                   | -0.173 |
| 537236584 | N/A      | N/A                                                                     | -0.173 |
| 157823485 | ANGEL1   | angel homolog 1                                                         | -0.173 |
| 166091519 | GRHPR    | glyoxylate and hydroxypyruvate reductase                                | -0.172 |
| 564387640 | DOCK9    | dedicator of cytokinesis 9                                              | -0.172 |
| 77628157  | ST18     | ST18, C2H2C-type zinc finger                                            | -0.172 |
| 672058640 | N/A      | N/A                                                                     | -0.172 |
| 124248495 | CHID1    | chitinase domain containing 1                                           | -0.171 |
| 444706842 | N/A      | N/A                                                                     | -0.171 |
| 300797936 | ACTR3B   | ARP3 actin related protein 3 homolog B                                  | -0.171 |
| 269954719 | JAZF1    | JAZF zinc finger 1                                                      | -0.171 |
| 148682229 | PDZD11   | PDZ domain containing 11                                                | -0.171 |
| 157822465 | MLH3     | mutL homolog 3                                                          | -0.171 |
| 149019021 | Sh3bgrl2 | SH3 domain binding glutamate-rich protein like 2                        | -0.170 |
| 149028240 | Fsd1     | fibronectin type III and SPRY domain containing 1                       | -0.170 |
| 50356003  | SCP2     | sterol carrier protein 2                                                | -0.170 |
| 625260426 | N/A      | N/A                                                                     | -0.170 |
| 18034783  | ABCC3    | ATP binding cassette subfamily C member 3                               | -0.170 |
| 62079101  | LAMP5    | lysosomal associated membrane protein family member 5                   | -0.170 |
| 61557212  | NARFL    | nuclear prelamin A recognition factor like                              | -0.170 |
| 149030303 | ELP3     | elongator acetyltransferase complex subunit 3                           | -0.170 |
| 62078711  | TMEM175  | transmembrane protein 175                                               | -0.170 |
| 157786960 | PIK3C2B  | phosphatidylinositol-4-phosphate 3-kinase catalytic subunit type 2 beta | -0.169 |
| 396941666 | Dync1i2  | dynein cytoplasmic 1 intermediate chain 2                               | -0.169 |
| 149063948 | N/A      | N/A                                                                     | -0.169 |
| 281604190 | INPP5B   | inositol polyphosphate-5-phosphatase B                                  | -0.169 |
| 440904939 | N/A      | N/A                                                                     | -0.169 |
| 16758188  | SLC7A8   | solute carrier family 7 member 8                                        | -0.169 |
| 209529691 | TMCO3    | transmembrane and coiled-coil domains 3                                 | -0.169 |
| 348041331 | SERTAD2  | SERTA domain containing 2                                               | -0.169 |

|           |          |                                                                    |        |
|-----------|----------|--------------------------------------------------------------------|--------|
| 149042395 | PRDX4    | peroxiredoxin 4                                                    | -0.169 |
| 149048094 | N/A      | N/A                                                                | -0.168 |
| 925114268 | GTF3C1   | general transcription factor IIIC subunit 1                        | -0.168 |
| 148668175 | EDNRB    | endothelin receptor type B                                         | -0.168 |
| 62339281  | ADAM9    | ADAM metallopeptidase domain 9                                     | -0.168 |
| 58219062  | CNDP2    | carosine dipeptidase 2                                             | -0.168 |
| 817472062 | CDK5RAP3 | CDK5 regulatory subunit associated protein 3                       | -0.167 |
| 564335900 | ZFHX4    | zinc finger homeobox 4                                             | -0.167 |
| 186910267 | LYRM2    | LYR motif containing 2                                             | -0.167 |
| 145279186 | GAS6     | growth arrest specific 6                                           | -0.167 |
| 169234846 | MBD2     | methyl-CpG binding domain protein 2                                | -0.167 |
| 149040047 | SYNPR    | synaptoporin                                                       | -0.167 |
| 157822019 | ITGB1BP1 | integrin subunit beta 1 binding protein 1                          | -0.166 |
| 9506591   | FDFT1    | farnesyl-diphosphate farnesyltransferase 1                         | -0.166 |
| 568975977 | STRADA   | STE20-related kinase adaptor alpha                                 | -0.166 |
| 19705545  | RAB3IL1  | RAB3A interacting protein like 1                                   | -0.166 |
| 20127390  | RNF112   | ring finger protein 112                                            | -0.166 |
| 62945358  | SCFD2    | sec1 family domain containing 2                                    | -0.165 |
| 155369271 | PRKACA   | protein kinase cAMP-activated catalytic subunit alpha              | -0.165 |
| 157817201 | NETO1    | neuropilin and tolloid like 1                                      | -0.165 |
| 6981076   | IDE      | insulin degrading enzyme                                           | -0.165 |
| 149062946 | EPHB4    | EPH receptor B4                                                    | -0.165 |
| 157817971 | FAM13B   | family with sequence similarity 13 member B                        | -0.165 |
| 60360580  | OGDH     | oxoglutarate dehydrogenase                                         | -0.165 |
| 568992887 | PRPF40B  | pre-mRNA processing factor 40 homolog B                            | -0.165 |
| 149031018 | COX4I2   | cytochrome c oxidase subunit 4I2                                   | -0.165 |
| 149046296 | CREG2    | cellular repressor of E1A stimulated genes 2                       | -0.165 |
| 13929002  | PFKM     | phosphofructokinase, muscle                                        | -0.165 |
| 13242243  | AXIN2    | axin 2                                                             | -0.164 |
| 148747253 | ATP1B1   | ATPase Na <sup>+</sup> /K <sup>+</sup> transporting subunit beta 1 | -0.164 |
| 149023207 | N/A      | N/A                                                                | -0.164 |
| 19173766  | LONP1    | lon peptidase 1, mitochondrial                                     | -0.164 |
| 79750129  | CAMK1D   | calcium/calmodulin dependent protein kinase ID                     | -0.164 |
| 149057384 | C15orf40 | chromosome 15 open reading frame 40                                | -0.163 |
| 62079137  | CD320    | CD320 molecule                                                     | -0.163 |
| 197245729 | CPSF1    | cleavage and polyadenylation specific factor 1                     | -0.163 |
| 564343351 | RIN2     | Ras and Rab interactor 2                                           | -0.163 |
| 672088848 | PLXNA3   | plexin A3                                                          | -0.163 |

|           |          |                                                                  |        |
|-----------|----------|------------------------------------------------------------------|--------|
| 12018278  | ILKAP    | ILK associated serine/threonine phosphatase                      | -0.163 |
| 67846010  | ROGDI    | rogdi homolog                                                    | -0.163 |
| 403224993 | ABHD11   | abhydrolase domain containing 11                                 | -0.163 |
| 6981542   | SLC16A1  | solute carrier family 16 member 1                                | -0.163 |
| 197384515 | UAP1L1   | UDP-N-acetylglucosamine pyrophosphorylase 1 like 1               | -0.163 |
| 672075219 | N/A      | N/A                                                              | -0.162 |
| 635141087 | N/A      | N/A                                                              | -0.162 |
| 148687256 | N/A      | N/A                                                              | -0.162 |
| 300798541 | MID2     | midline 2                                                        | -0.162 |
| 124486885 | LRRC7    | leucine rich repeat containing 7                                 | -0.162 |
| 346989661 | CPEB2    | cytoplasmic polyadenylation element binding protein 2            | -0.162 |
| 56090387  | CPTP     | ceramide-1-phosphate transfer protein                            | -0.161 |
| 807677    | N/A      | N/A                                                              | -0.161 |
| 982250550 | N/A      | N/A                                                              | -0.161 |
| 556758981 | N/A      | N/A                                                              | -0.161 |
| 392344250 | SPTY2D1  | SPT2 chromatin protein domain containing 1                       | -0.161 |
| 109488292 | POLR2A   | RNA polymerase II subunit A                                      | -0.161 |
| 149052635 | TNIP1    | TNFAIP3 interacting protein 1                                    | -0.161 |
| 157820049 | LRFN5    | leucine rich repeat and fibronectin type III domain containing 5 | -0.161 |
| 40786447  | CFDP1    | craniofacial development protein 1                               | -0.160 |
| 672063062 | N/A      | N/A                                                              | -0.160 |
| 76096352  | ALDH16A1 | aldehyde dehydrogenase 16 family member A1                       | -0.160 |
| 224967128 | TBRG1    | transforming growth factor beta regulator 1                      | -0.159 |
| 16758808  | EPB41L3  | erythrocyte membrane protein band 4.1 like 3                     | -0.159 |
| 157819829 | HACD3    | 3-hydroxyacyl-CoA dehydratase 3                                  | -0.159 |
| 149066619 | B4GALNT1 | beta-1,4-N-acetyl-galactosaminyltransferase 1                    | -0.159 |
| 158186708 | PDCD11   | programmed cell death 11                                         | -0.159 |
| 198278547 | TMEM41A  | transmembrane protein 41A                                        | -0.159 |
| 154146247 | TMEM38A  | transmembrane protein 38A                                        | -0.159 |
| 401664552 | MRPS7    | mitochondrial ribosomal protein S7                               | -0.159 |
| 52345385  | PDIA6    | protein disulfide isomerase family A member 6                    | -0.159 |
| 56605830  | CLBA1    | clathrin binding box of aftiphilin containing 1                  | -0.158 |
| 686713740 | N/A      | N/A                                                              | -0.158 |
| 198442897 | AFG3L2   | AFG3 like matrix AAA peptidase subunit 2                         | -0.158 |
| 61556993  | HIBCH    | 3-hydroxyisobutyryl-CoA hydrolase                                | -0.158 |
| 387157884 | INO80    | INO80 complex subunit                                            | -0.158 |
| 62078637  | LCA5     | LCA5, lebercilin                                                 | -0.158 |

|           |              |                                                                                                      |        |
|-----------|--------------|------------------------------------------------------------------------------------------------------|--------|
| 564397835 | ASCC1        | activating signal cointegrator 1 complex subunit 1                                                   | -0.158 |
| 148677354 | CNOT10       | CCR4-NOT transcription complex subunit 10                                                            | -0.158 |
| 524962788 | N/A          | N/A                                                                                                  | -0.158 |
| 18777747  | MGEA5        | meningioma expressed antigen 5 (hyaluronidase)                                                       | -0.158 |
| 74201328  | ST6GALNAC4   | ST6 N-acetylgalactosaminide alpha-2,6-sialyltransferase 4                                            | -0.158 |
| 209529636 | PPA2         | pyrophosphatase (inorganic) 2                                                                        | -0.158 |
| 6981168   | LPL          | lipoprotein lipase                                                                                   | -0.158 |
| 18034785  | ABCB6        | ATP binding cassette subfamily B member 6 (Langereis blood group)                                    | -0.158 |
| 672033256 | LOC100912904 | disks large homolog 5-like                                                                           | -0.157 |
| 537272666 | N/A          | N/A                                                                                                  | -0.157 |
| 149634159 | N/A          | N/A                                                                                                  | -0.157 |
| 56972416  | IFI30        | IFI30, lysosomal thiol reductase                                                                     | -0.157 |
| 149016230 | ACSL3        | acyl-CoA synthetase long chain family member 3                                                       | -0.157 |
| 194474054 | EFR3A        | EFR3 homolog A                                                                                       | -0.157 |
| 62078609  | Dync2li1     | dynein cytoplasmic 2 light intermediate chain 1                                                      | -0.157 |
| 148677282 | N/A          | N/A                                                                                                  | -0.157 |
| 672022833 | Scaper       | S-phase cyclin A-associated protein in the ER                                                        | -0.157 |
| 961763390 | N/A          | N/A                                                                                                  | -0.156 |
| 48675845  | ATIC         | 5-aminoimidazole-4-carboxamide ribonucleotide formyltransferase/IMP cyclohydrolase                   | -0.156 |
| 12838537  | C19orf81     | chromosome 19 open reading frame 81                                                                  | -0.156 |
| 148668476 | N/A          | N/A                                                                                                  | -0.156 |
| 564299821 | PARP8        | poly(ADP-ribose) polymerase family member 8                                                          | -0.155 |
| 13928730  | SCARB1       | scavenger receptor class B member 1                                                                  | -0.155 |
| 19173802  | PPP1R14C     | protein phosphatase 1 regulatory inhibitor subunit 14C                                               | -0.155 |
| 564376241 | N/A          | N/A                                                                                                  | -0.155 |
| 18266726  | PAICS        | phosphoribosylaminoimidazole carboxylase and phosphoribosylaminoimidazolesuccinocarboxamide synthase | -0.155 |
| 109639149 | Lonp2        | lon peptidase 2, peroxisomal                                                                         | -0.154 |
| 149026580 | N/A          | N/A                                                                                                  | -0.154 |
| 6649914   | GDF11        | growth differentiation factor 11                                                                     | -0.154 |
| 158534079 | CHRNA5       | cholinergic receptor nicotinic alpha 5 subunit                                                       | -0.154 |



|           |                             |                                                                 |        |
|-----------|-----------------------------|-----------------------------------------------------------------|--------|
| 564385664 | FERMT2                      | fermitin family member 2                                        | -0.154 |
| 564324344 | LOC363306 (includes others) | hypothetical protein LOC363306                                  | -0.154 |
| 6978765   | DLX5                        | distal-less homeobox 5                                          | -0.154 |
| 55741778  | SMPD1                       | sphingomyelin phosphodiesterase 1                               | -0.153 |
| 157817678 | BUB1                        | BUB1 mitotic checkpoint serine/threonine kinase                 | -0.153 |
| 158636004 | FLOT1                       | flotillin 1                                                     | -0.153 |
| 195976798 | SLBP                        | stem-loop binding protein                                       | -0.153 |
| 532100790 | N/A                         | N/A                                                             | -0.153 |
| 521031426 | N/A                         | N/A                                                             | -0.153 |
| 8394496   | TYRO3                       | TYRO3 protein tyrosine kinase                                   | -0.152 |
| 149020656 | MRE11                       | MRE11 homolog, double strand break repair nuclease              | -0.152 |
| 149045578 | N/A                         | N/A                                                             | -0.152 |
| 403225003 | KCNQ5                       | potassium voltage-gated channel subfamily Q member 5            | -0.152 |
| 664703871 | N/A                         | N/A                                                             | -0.151 |
| 564388617 | KXD1                        | KxDL motif containing 1                                         | -0.150 |
| 564370968 | MAPK8IP3                    | mitogen-activated protein kinase 8 interacting protein 3        | -0.150 |
| 149024719 | NOL9                        | nucleolar protein 9                                             | -0.150 |
| 61556967  | EEF1D                       | eukaryotic translation elongation factor 1 delta                | -0.150 |
| 953875962 | N/A                         | N/A                                                             | -0.150 |
| 149032539 | HECW1                       | HECT, C2 and WW domain containing E3 ubiquitin protein ligase 1 | -0.150 |
| 71043650  | SRPK1                       | SRSF protein kinase 1                                           | -0.150 |
| 118150676 | CCNA2                       | cyclin A2                                                       | -0.149 |
| 672046065 | N/A                         | N/A                                                             | -0.149 |
| 62078573  | C20orf24                    | chromosome 20 open reading frame 24                             | -0.149 |
| 76880459  | THOC6                       | THO complex 6                                                   | -0.149 |
| 537139221 | N/A                         | N/A                                                             | -0.149 |
| 755498773 | ITGA6                       | integrin subunit alpha 6                                        | -0.149 |
| 41281619  | PCDHA10                     | protocadherin alpha 10                                          | -0.149 |
| 157819977 | CERS4                       | ceramide synthase 4                                             | -0.149 |
| 672041603 | N/A                         | N/A                                                             | -0.149 |
| 113461996 | COA5                        | cytochrome c oxidase assembly factor 5                          | -0.149 |
| 880936540 | N/A                         | N/A                                                             | -0.149 |
| 50510837  | KIAA1191                    | KIAA1191                                                        | -0.148 |
| 8394227   | PTPRO                       | protein tyrosine phosphatase, receptor type O                   | -0.148 |

|           |                     |                                                            |        |
|-----------|---------------------|------------------------------------------------------------|--------|
| 109505096 | NID1                | nidogen 1                                                  | -0.148 |
| 564388440 | MYO9B               | myosin IXB                                                 | -0.148 |
| 926693529 | N/A                 | N/A                                                        | -0.148 |
| 157821569 | ASH2L               | ASH2 like histone lysine methyltransferase complex subunit | -0.148 |
| 84781723  | TRAP1               | TNF receptor associated protein 1                          | -0.148 |
| 544434017 | N/A                 | N/A                                                        | -0.148 |
| 717324516 | SCN8A               | sodium voltage-gated channel alpha subunit 8               | -0.147 |
| 672016955 | MAP3K20             | mitogen-activated protein kinase kinase kinase 20          | -0.147 |
| 564393851 | N/A                 | N/A                                                        | -0.147 |
| 564390319 | GKAP1               | G kinase anchoring protein 1                               | -0.147 |
| 300794996 | NDST3               | N-deacetylase and N-sulfotransferase 3                     | -0.147 |
| 48976085  | GM2A                | GM2 ganglioside activator                                  | -0.147 |
| 755553984 | THAP7               | THAP domain containing 7                                   | -0.147 |
| 564364792 | SNAP91              | synaptosome associated protein 91                          | -0.147 |
| 157818033 | ATG4C               | autophagy related 4C cysteine peptidase                    | -0.146 |
| 6980978   | GPD2                | glycerol-3-phosphate dehydrogenase 2                       | -0.146 |
| 157820591 | AVEN                | apoptosis and caspase activation inhibitor                 | -0.146 |
| 55742755  | CTNNA1              | catenin alpha 1                                            | -0.146 |
| 40254752  | PGK1                | phosphoglycerate kinase 1                                  | -0.146 |
| 6980956   | GLUD1               | glutamate dehydrogenase 1                                  | -0.146 |
| 149064661 | PLCH1               | phospholipase C eta 1                                      | -0.146 |
| 564311572 | N/A                 | N/A                                                        | -0.145 |
| 564321893 | ICOSLG/LOC102723996 | inducible T cell costimulator ligand                       | -0.145 |
| 148703734 | MID1IP1             | MID1 interacting protein 1                                 | -0.145 |
| 71043702  | TM9SF4              | transmembrane 9 superfamily member 4                       | -0.145 |
| 8392888   | AKT2                | AKT serine/threonine kinase 2                              | -0.145 |
| 157820565 | HSCB                | HscB mitochondrial iron-sulfur cluster cochaperone         | -0.145 |
| 569006964 | C9orf40             | chromosome 9 open reading frame 40                         | -0.145 |
| 157820561 | NAT10               | N-acetyltransferase 10                                     | -0.144 |
| 19173762  | NAP1L3              | nucleosome assembly protein 1 like 3                       | -0.144 |
| 564347453 | ALMS1               | ALMS1, centrosome and basal body associated protein        | -0.144 |
| 984094253 | N/A                 | N/A                                                        | -0.144 |
| 148672025 | MAP3K12             | mitogen-activated protein kinase kinase kinase 12          | -0.144 |

|           |          |                                                                            |        |
|-----------|----------|----------------------------------------------------------------------------|--------|
| 281485631 | NAA38    | N(alpha)-acetyltransferase 38, NatC auxiliary subunit                      | -0.143 |
| 283837900 | FOXH1    | forkhead box H1                                                            | -0.143 |
| 148671058 | N/A      | N/A                                                                        | -0.143 |
| 288806592 | PRKCB    | protein kinase C beta                                                      | -0.143 |
| 109472884 | UBE3C    | ubiquitin protein ligase E3C                                               | -0.142 |
| 157823986 | MAN1A2   | mannosidase alpha class 1A member 2                                        | -0.142 |
| 730229363 | RALGAPA1 | Ral GTPase activating protein catalytic alpha subunit 1                    | -0.142 |
| 71122474  | PPA1     | pyrophosphatase (inorganic) 1                                              | -0.142 |
| 564334920 | HMGCR    | 3-hydroxy-3-methylglutaryl-CoA reductase                                   | -0.142 |
| 60223057  | SUPV3L1  | Suv3 like RNA helicase                                                     | -0.142 |
| 564383481 | SRD5A3   | steroid 5 alpha-reductase 3                                                | -0.142 |
| 6756037   | YWHAH    | tyrosine 3-monooxygenase/tryptophan 5-monooxygenase activation protein eta | -0.142 |
| 157822025 | NDOR1    | NADPH dependent diflavin oxidoreductase 1                                  | -0.142 |
| 148671875 | TMEM50B  | transmembrane protein 50B                                                  | -0.142 |
| 16905129  | NECAB2   | N-terminal EF-hand calcium binding protein 2                               | -0.141 |
| 56090241  | THTPA    | thiamine triphosphatase                                                    | -0.141 |
| 26328955  | ETNK1    | ethanolamine kinase 1                                                      | -0.141 |
| 300793996 | TCHP     | trichoplein keratin filament binding                                       | -0.141 |
| 149065077 | FAM3C    | family with sequence similarity 3 member C                                 | -0.141 |
| 984090530 | N/A      | N/A                                                                        | -0.141 |
| 411147403 | APLP2    | amyloid beta precursor like protein 2                                      | -0.141 |
| 148692881 | OXNAD1   | oxidoreductase NAD binding domain containing 1                             | -0.140 |
| 157822919 | GANAB    | glucosidase II alpha subunit                                               | -0.140 |
| 66730507  | CCDC134  | coiled-coil domain containing 134                                          | -0.140 |
| 281306811 | ATP4A    | ATPase H <sup>+</sup> /K <sup>+</sup> transporting alpha subunit           | -0.140 |
| 189027115 | AIDA     | axin interactor, dorsalization associated                                  | -0.140 |
| 9507043   | RGS12    | regulator of G protein signaling 12                                        | -0.139 |
| 16758736  | NLGN1    | neuroligin 1                                                               | -0.139 |
| 201066369 | LGI2     | leucine rich repeat LGI family member 2                                    | -0.139 |
| 8393450   | GLG1     | golgi glycoprotein 1                                                       | -0.139 |
| 51948478  | FARSB    | phenylalanyl-tRNA synthetase beta subunit                                  | -0.138 |
| 6978751   | CYP51A1  | cytochrome P450 family 51 subfamily A member 1                             | -0.138 |
| 444728185 | N/A      | N/A                                                                        | -0.138 |
| 77627979  | SRPRA    | SRP receptor alpha subunit                                                 | -0.138 |
| 148665211 | N/A      | N/A                                                                        | -0.137 |

|           |         |                                                            |        |
|-----------|---------|------------------------------------------------------------|--------|
| 564389848 | ERICH1  | glutamate rich 1                                           | -0.137 |
| 403044506 | SUPT5H  | SPT5 homolog, DSIF elongation factor subunit               | -0.137 |
| 68163557  | CDCA8   | cell division cycle associated 8                           | -0.136 |
| 281485565 | RASGRF1 | Ras protein specific guanine nucleotide releasing factor 1 | -0.136 |
| 157820105 | UVRAG   | UV radiation resistance associated                         | -0.136 |
| 674044244 | N/A     | N/A                                                        | -0.136 |
| 25742686  | ELOVL6  | ELOVL fatty acid elongase 6                                | -0.136 |
| 14091777  | Chn1    | chimerin 1                                                 | -0.136 |
| 189083764 | MARS    | methionyl-tRNA synthetase                                  | -0.136 |
| 564317187 | N/A     | N/A                                                        | -0.136 |
| 205640    | CHRNA4  | cholinergic receptor nicotinic alpha 4 subunit             | -0.136 |
| 197384309 | SLC39A1 | solute carrier family 39 member 1                          | -0.136 |
| 62079259  | CEP83   | centrosomal protein 83                                     | -0.135 |
| 612030228 | N/A     | N/A                                                        | -0.135 |
| 672044529 | MIGA1   | mitoguardin 1                                              | -0.135 |
| 157823401 | PIGH    | phosphatidylinositol glycan anchor biosynthesis class H    | -0.135 |
| 12018252  | TKT     | transketolase                                              | -0.134 |
| 690969208 | MCC     | mutated in colorectal cancers                              | -0.134 |
| 564338482 | SORT1   | sortilin 1                                                 | -0.134 |
| 53850598  | DDX59   | DEAD-box helicase 59                                       | -0.134 |
| 157823181 | SKP2    | S-phase kinase associated protein 2                        | -0.134 |
| 157817708 | PPP6R2  | protein phosphatase 6 regulatory subunit 2                 | -0.134 |
| 40288195  | GABRG3  | gamma-aminobutyric acid type A receptor gamma3 subunit     | -0.134 |
| 537141312 | N/A     | N/A                                                        | -0.134 |
| 148693879 | WDR61   | WD repeat domain 61                                        | -0.133 |
| 760996272 | EHBP1   | EH domain binding protein 1                                | -0.133 |
| 72384369  | KIF1BP  | KIF1 binding protein                                       | -0.133 |
| 31542604  | ERC1    | ELKS/RAB6-interacting/CAST family member 1                 | -0.133 |
| 6981166   | PLAGL1  | PLAG1 like zinc finger 1                                   | -0.133 |
| 300794317 | SFI1    | SFI1 centrin binding protein                               | -0.133 |
| 674075764 | N/A     | N/A                                                        | -0.133 |
| 672080550 | TDRP    | testis development related protein                         | -0.133 |
| 62078691  | Lrwd1   | leucine-rich repeats and WD repeat domain containing 1     | -0.132 |
| 564345487 | RINT1   | RAD50 interactor 1                                         | -0.132 |
| 157817604 | PIK3R4  | phosphoinositide-3-kinase regulatory subunit 4             | -0.132 |

|           |               |                                                                         |        |
|-----------|---------------|-------------------------------------------------------------------------|--------|
| 402534517 | EPB41L1       | erythrocyte membrane protein band 4.1 like 1                            | -0.132 |
| 149015561 | N/A           | N/A                                                                     | -0.132 |
| 71896602  | NEU1          | neuraminidase 1                                                         | -0.132 |
| 20302117  | FNBP1         | formin binding protein 1                                                | -0.132 |
| 725548711 | N/A           | N/A                                                                     | -0.132 |
| 50510357  | GPD1L         | glycerol-3-phosphate dehydrogenase 1 like                               | -0.132 |
| 62078739  | TCTA          | T cell leukemia translocation altered                                   | -0.131 |
| 35215304  | CLMP          | CXADR like membrane protein                                             | -0.131 |
| 62078667  | SLC46A1       | solute carrier family 46 member 1                                       | -0.131 |
| 56605798  | RNF167        | ring finger protein 167                                                 | -0.131 |
| 880928207 | N/A           | N/A                                                                     | -0.130 |
| 148747541 | HNRNPU        | heterogeneous nuclear ribonucleoprotein U                               | -0.130 |
| 9507177   | USO1          | USO1 vesicle transport factor                                           | -0.130 |
| 8394354   | SQLE          | squalene epoxidase                                                      | -0.129 |
| 144445950 | XRCC6         | X-ray repair cross complementing 6                                      | -0.129 |
| 564351227 | E130308A19Rik | RIKEN cDNA E130308A19 gene                                              | -0.129 |
| 472381467 | N/A           | N/A                                                                     | -0.129 |
| 568985444 | CADPS         | calcium dependent secretion activator                                   | -0.129 |
| 158749632 | DBT           | dihydrolipoamide branched chain transacylase E2                         | -0.129 |
| 56090363  | TEX264        | testis expressed 264                                                    | -0.129 |
| 149019723 | PPIL2         | peptidylprolyl isomerase like 2                                         | -0.129 |
| 66730427  | CENPT         | centromere protein T                                                    | -0.129 |
| 672048439 | CABLES2       | Cdk5 and Abl enzyme substrate 2                                         | -0.128 |
| 189181730 | PRKD3         | protein kinase D3                                                       | -0.128 |
| 6981520   | SDC2          | syndecan 2                                                              | -0.128 |
| 158711729 | HACE1         | HECT domain and ankyrin repeat containing E3 ubiquitin protein ligase 1 | -0.128 |
| 19924067  | NME7          | NME/NM23 family member 7                                                | -0.128 |
| 398650648 | SLC8A1        | solute carrier family 8 member A1                                       | -0.127 |
| 226874873 | GUK1          | guanylate kinase 1                                                      | -0.127 |
| 672071181 | N/A           | N/A                                                                     | -0.127 |
| 21553105  | AIF1L         | allograft inflammatory factor 1 like                                    | -0.127 |
| 37359832  | SCRN1         | secernin 1                                                              | -0.127 |
| 55742813  | BDH1          | 3-hydroxybutyrate dehydrogenase 1                                       | -0.127 |
| 163659911 | GRIK1         | glutamate ionotropic receptor kainate type subunit 1                    | -0.126 |
| 740086795 | POLR2B        | RNA polymerase II subunit B                                             | -0.126 |
| 149035673 | FAF1          | Fas associated factor 1                                                 | -0.126 |
| 114052913 | CADM2         | cell adhesion molecule 2                                                | -0.126 |

|           |          |                                                          |        |
|-----------|----------|----------------------------------------------------------|--------|
| 564382183 | EPRS     | glutamyl-prolyl-tRNA synthetase                          | -0.126 |
| 55926219  | DDX39A   | DExD-box helicase 39A                                    | -0.126 |
| 77415383  | HSPA8    | heat shock protein family A (Hsp70) member 8             | -0.125 |
| 564398462 | Slc9a7   | solute carrier family 9 member A7                        | -0.125 |
| 149053938 | SLC35B1  | solute carrier family 35 member B1                       | -0.125 |
| 357527369 | PRMT8    | protein arginine methyltransferase 8                     | -0.124 |
| 672059390 | N/A      | N/A                                                      | -0.124 |
| 399498531 | NDRG2    | NDRG family member 2                                     | -0.123 |
| 564339312 | FUBP1    | far upstream element binding protein 1                   | -0.123 |
| 58865700  | GRWD1    | glutamate rich WD repeat containing 1                    | -0.123 |
| 157820919 | POLE4    | DNA polymerase epsilon 4, accessory subunit              | -0.123 |
| 281604211 | RAB3GAP2 | RAB3 GTPase activating non-catalytic protein subunit 2   | -0.123 |
| 149064207 | COMMD10  | COMM domain containing 10                                | -0.123 |
| 149040761 | TAGLN2   | transgelin 2                                             | -0.122 |
| 672061192 | ANLN     | anillin actin binding protein                            | -0.122 |
| 51980666  | CHAC2    | ChaC cation transport regulator homolog 2                | -0.122 |
| 564323194 | Col4a5   | collagen type IV alpha 5 chain                           | -0.122 |
| 28269685  | HOPX     | HOP homeobox                                             | -0.122 |
| 157817043 | ACOT13   | acyl-CoA thioesterase 13                                 | -0.122 |
| 564308814 | N/A      | N/A                                                      | -0.122 |
| 564301782 | CERS6    | ceramide synthase 6                                      | -0.122 |
| 564326713 | ZC3H4    | zinc finger CCCH-type containing 4                       | -0.121 |
| 149024626 | EXOSC10  | exosome component 10                                     | -0.121 |
| 166158339 | REEP3    | receptor accessory protein 3                             | -0.121 |
| 157822423 | LRSAM1   | leucine rich repeat and sterile alpha motif containing 1 | -0.121 |
| 157820617 | TUBGCP2  | tubulin gamma complex associated protein 2               | -0.121 |
| 253683488 | NTRK2    | neurotrophic receptor tyrosine kinase 2                  | -0.121 |
| 157817346 | ATP9B    | ATPase phospholipid transporting 9B (putative)           | -0.121 |
| 158254369 | CDK10    | cyclin dependent kinase 10                               | -0.121 |
| 74229032  | TPCN1    | two pore segment channel 1                               | -0.121 |
| 401709975 | GPR176   | G protein-coupled receptor 176                           | -0.121 |
| 209870013 | ITSN1    | intersectin 1                                            | -0.121 |
| 157822001 | RACGAP1  | Rac GTPase activating protein 1                          | -0.120 |
| 274325671 | SCAMP3   | secretory carrier membrane protein 3                     | -0.119 |
| 51948426  | RTCA     | RNA 3'-terminal phosphate cyclase                        | -0.119 |
| 568907121 | N/A      | N/A                                                      | -0.119 |
| 149043706 | PRMT2    | protein arginine methyltransferase 2                     | -0.119 |
| 197387125 | CCSER1   | coiled-coil serine rich protein 1                        | -0.118 |

|           |              |                                                       |        |
|-----------|--------------|-------------------------------------------------------|--------|
| 672041232 | PDE8B        | phosphodiesterase 8B                                  | -0.118 |
| 27229314  | FIBP         | FGF1 intracellular binding protein                    | -0.118 |
| 149047238 | ADGRA3       | adhesion G protein-coupled receptor A3                | -0.118 |
| 585716513 | N/A          | N/A                                                   | -0.118 |
| 71896549  | UTP14A       | UTP14A, small subunit processome component            | -0.118 |
| 537146709 | N/A          | N/A                                                   | -0.118 |
| 532074114 | N/A          | N/A                                                   | -0.118 |
| 28212228  | RCAN2        | regulator of calcineurin 2                            | -0.118 |
| 564385256 | N/A          | N/A                                                   | -0.117 |
| 157820497 | DDX51        | DEAD-box helicase 51                                  | -0.117 |
| 476007242 | EPS8         | epidermal growth factor receptor pathway substrate 8  | -0.117 |
| 398303839 | SH3GL2       | SH3 domain containing GRB2 like 2, endophilin A1      | -0.117 |
| 953870558 | N/A          | N/A                                                   | -0.116 |
| 293339963 | RAB11FIP3    | RAB11 family interacting protein 3                    | -0.116 |
| 852792963 | N/A          | N/A                                                   | -0.116 |
| 201066352 | ANKRD6       | ankyrin repeat domain 6                               | -0.116 |
| 564347854 | GRIP2        | glutamate receptor interacting protein 2              | -0.116 |
| 57012426  | HLA-A        | major histocompatibility complex, class I, A          | -0.115 |
| 157823994 | PNMA8A       | PNMA family member 8A                                 | -0.115 |
| 817280433 | N/A          | N/A                                                   | -0.115 |
| 8393390   | GABRB3       | gamma-aminobutyric acid type A receptor beta3 subunit | -0.115 |
| 52138635  | ETFDH        | electron transfer flavoprotein dehydrogenase          | -0.115 |
| 56605990  | LRPPRC       | leucine rich pentatricopeptide repeat containing      | -0.115 |
| 29789269  | GRIA1        | glutamate ionotropic receptor AMPA type subunit 1     | -0.115 |
| 67078458  | CRELD1       | cysteine rich with EGF like domains 1                 | -0.115 |
| 149059529 | LOC100910558 | uncharacterized LOC100910558                          | -0.114 |
| 399124797 | KIFC2        | kinesin family member C2                              | -0.114 |
| 11560079  | KIT          | KIT proto-oncogene receptor tyrosine kinase           | -0.114 |
| 6978621   | CCNG1        | cyclin G1                                             | -0.114 |
| 672019106 | ASPH         | aspartate beta-hydroxylase                            | -0.114 |
| 56912225  | CIAO1        | cytosolic iron-sulfur assembly component 1            | -0.114 |
| 157823175 | ZC3H7A       | zinc finger CCCH-type containing 7A                   | -0.114 |
| 78126149  | SDF4         | stromal cell derived factor 4                         | -0.113 |
| 149061951 | CORO1B       | coronin 1B                                            | -0.113 |
| 404247435 | YLPM1        | YLP motif containing 1                                | -0.113 |
| 157823591 | MTMR14       | myotubularin related protein 14                       | -0.113 |

|           |          |                                                          |        |
|-----------|----------|----------------------------------------------------------|--------|
| 60360272  | KLHL5    | kelch like family member 5                               | -0.113 |
| 68163527  | HMCES    | 5-hydroxymethylcytosine (hmC) binding, ES cell-specific  | -0.113 |
| 931599326 | N/A      | N/A                                                      | -0.113 |
| 160333166 | Pid1     | phosphotyrosine interaction domain containing 1          | -0.113 |
| 56090463  | GORASP2  | golgi reassembly stacking protein 2                      | -0.113 |
| 148698492 | RIMKLA   | ribosomal modification protein rimK like family member A | -0.112 |
| 149030275 | PRSS55   | protease, serine 55                                      | -0.112 |
| 149031313 | N/A      | N/A                                                      | -0.112 |
| 431895094 | N/A      | N/A                                                      | -0.112 |
| 564353678 | USP48    | ubiquitin specific peptidase 48                          | -0.112 |
| 149065950 | C22orf23 | chromosome 22 open reading frame 23                      | -0.111 |
| 149064946 | PON2     | paraoxonase 2                                            | -0.111 |
| 8393038   | CAPN2    | calpain 2                                                | -0.111 |
| 469608396 | DUSP18   | dual specificity phosphatase 18                          | -0.111 |
| 672046063 | Slc25a12 | solute carrier family 25 member 12                       | -0.111 |
| 330340424 | TMTC2    | transmembrane and tetratricopeptide repeat containing 2  | -0.111 |
| 148673922 | HSPH1    | heat shock protein family H (Hsp110) member 1            | -0.110 |
| 300794591 | FXN      | frataxin                                                 | -0.110 |
| 149018872 | N/A      | N/A                                                      | -0.110 |
| 8394331   | SOD2     | superoxide dismutase 2                                   | -0.110 |
| 564355419 | Nbas     | neuroblastoma amplified sequence                         | -0.110 |
| 349501010 | FAM120B  | family with sequence similarity 120B                     | -0.110 |
| 157786602 | NHP2     | NHP2 ribonucleoprotein                                   | -0.110 |
| 157823249 | FAM81A   | family with sequence similarity 81 member A              | -0.109 |
| 281352199 | N/A      | N/A                                                      | -0.109 |
| 524960503 | N/A      | N/A                                                      | -0.108 |
| 655863889 | N/A      | N/A                                                      | -0.108 |
| 57164133  | NDUFC2   | NADH:ubiquinone oxidoreductase subunit C2                | -0.108 |
| 694981804 | CLDN5    | claudin 5                                                | -0.108 |
| 37360274  | N/A      | N/A                                                      | -0.108 |
| 51948408  | FUCA2    | alpha-L-fucosidase 2                                     | -0.107 |
| 89337260  | FTO      | FTO, alpha-ketoglutarate dependent dioxygenase           | -0.107 |
| 148673176 | FABP7    | fatty acid binding protein 7                             | -0.107 |



|           |                  |                                                                 |        |
|-----------|------------------|-----------------------------------------------------------------|--------|
| 81884516  | Rhno1            | RAD9-HUS1-RAD1 interacting nuclear orphan 1                     | -0.107 |
| 184160976 | PRMT5            | protein arginine methyltransferase 5                            | -0.107 |
| 61556863  | BTBD9            | BTB domain containing 9                                         | -0.106 |
| 114326232 | GPAT4            | glycerol-3-phosphate acyltransferase 4                          | -0.106 |
| 564311487 | LONRF2           | LON peptidase N-terminal domain and ring finger 2               | -0.106 |
| 274326692 | UQCC3            | ubiquinol-cytochrome c reductase complex assembly factor 3      | -0.106 |
| 149040289 | C10orf76         | chromosome 10 open reading frame 76                             | -0.106 |
| 58865384  | NDUFS2           | NADH:ubiquinone oxidoreductase core subunit S2                  | -0.106 |
| 19424310  | SLC31A1          | solute carrier family 31 member 1                               | -0.106 |
| 672066454 | Mkl2             | MKL1/myocardin like 2                                           | -0.106 |
| 564389912 | N/A              | N/A                                                             | -0.106 |
| 149031313 | N/A              | N/A                                                             | -0.105 |
| 512971254 | N/A              | N/A                                                             | -0.105 |
| 148691063 | CCNY             | cyclin Y                                                        | -0.105 |
| 149066342 | N/A              | N/A                                                             | -0.105 |
| 795140840 | N/A              | N/A                                                             | -0.105 |
| 157816887 | LOC500028/Yae1d1 | Yae1 domain containing 1                                        | -0.105 |
| 880971033 | N/A              | N/A                                                             | -0.104 |
| 164663858 | VAV2             | vav guanine nucleotide exchange factor 2                        | -0.104 |
| 672065125 | ADAM23           | ADAM metallopeptidase domain 23                                 | -0.104 |
| 298231200 | INSR             | insulin receptor                                                | -0.104 |
| 157822757 | MAP3K4           | mitogen-activated protein kinase kinase kinase 4                | -0.104 |
| 55249662  | Masp1            | mannan-binding lectin serine peptidase 1                        | -0.104 |
| 282158057 | ASTN1            | astrotactin 1                                                   | -0.103 |
| 341823648 | RAPH1            | Ras association (RalGDS/AF-6) and pleckstrin homology domains 1 | -0.103 |
| 148707802 | DARS             | aspartyl-tRNA synthetase                                        | -0.103 |
| 13928818  | PTPRN2           | protein tyrosine phosphatase, receptor type N2                  | -0.102 |
| 282154799 | NFU1             | NFU1 iron-sulfur cluster scaffold                               | -0.102 |
| 9665227   | DLG4             | discs large MAGUK scaffold protein 4                            | -0.101 |
| 158186625 | FGFR4            | fibroblast growth factor receptor 4                             | -0.101 |
| 164519053 | FAM131B          | family with sequence similarity 131 member B                    | -0.101 |
| 564368924 | STK16            | serine/threonine kinase 16                                      | -0.101 |
| 67846036  | DNPEP            | aspartyl aminopeptidase                                         | -0.101 |

|           |          |                                                                                      |        |
|-----------|----------|--------------------------------------------------------------------------------------|--------|
| 55741823  | TARS     | threonyl-tRNA synthetase                                                             | -0.101 |
| 674095102 | N/A      | N/A                                                                                  | -0.101 |
| 16758210  | NUCB1    | nucleobindin 1                                                                       | -0.101 |
| 157821419 | C14orf37 | chromosome 14 open reading frame 37                                                  | -0.101 |
| 281306763 | NTN3     | netrin 3                                                                             | -0.100 |
| 10946604  | SEC61A2  | Sec61 translocon alpha 2 subunit                                                     | -0.100 |
| 58865936  | SIKE1    | suppressor of IKBKE 1                                                                | -0.100 |
| 157818589 | TSPAN7   | tetraspanin 7                                                                        | -0.100 |
| 161760632 | ACLY     | ATP citrate lyase                                                                    | -0.100 |
| 300794843 | IQGAP3   | IQ motif containing GTPase activating protein 3                                      | -0.100 |
| 625187436 | N/A      | N/A                                                                                  | -0.099 |
| 392353562 | ATP8A2   | ATPase phospholipid transporting 8A2                                                 | -0.099 |
| 672068312 | N/A      | N/A                                                                                  | -0.099 |
| 157821685 | ABL2     | ABL proto-oncogene 2, non-receptor tyrosine kinase                                   | -0.099 |
| 157819175 | Gpr165   | G protein-coupled receptor 165                                                       | -0.099 |
| 149036808 | ARL6IP5  | ADP ribosylation factor like GTPase 6 interacting protein 5                          | -0.099 |
| 61889092  | AK1      | adenylate kinase 1                                                                   | -0.099 |
| 55741628  | EIF2B5   | eukaryotic translation initiation factor 2B subunit epsilon                          | -0.099 |
| 403377905 | SRGAP2   | SLIT-ROBO Rho GTPase activating protein 2                                            | -0.098 |
| 224967068 | PLCB1    | phospholipase C beta 1                                                               | -0.098 |
| 149059350 | Plpp1    | phospholipid phosphatase 1                                                           | -0.098 |
| 25282395  | GSTM3    | glutathione S-transferase mu 3                                                       | -0.098 |
| 672069439 | N/A      | N/A                                                                                  | -0.098 |
| 77812688  | ZNF384   | zinc finger protein 384                                                              | -0.098 |
| 38649320  | ENO1     | enolase 1                                                                            | -0.097 |
| 157822707 | PCDH20   | protocadherin 20                                                                     | -0.097 |
| 744603535 | N/A      | N/A                                                                                  | -0.097 |
| 564355613 | HBP1     | HMG-box transcription factor 1                                                       | -0.097 |
| 157786742 | HIC2     | HIC ZBTB transcriptional repressor 2                                                 | -0.097 |
| 71043910  | SMYD3    | SET and MYND domain containing 3                                                     | -0.097 |
| 120586971 | MAGEE1   | MAGE family member E1                                                                | -0.097 |
| 58865778  | DDOST    | dolichyl-diphosphooligosaccharide--protein glycosyltransferase non-catalytic subunit | -0.096 |
| 40254595  | DPYSL2   | dihydropyrimidinase like 2                                                           | -0.096 |
| 281427192 | CDH11    | cadherin 11                                                                          | -0.096 |

|           |                 |                                                                                                                            |        |
|-----------|-----------------|----------------------------------------------------------------------------------------------------------------------------|--------|
| 253970439 | KCNA6           | potassium voltage-gated channel subfamily A member 6                                                                       | -0.096 |
| 41152510  | PLPPR1          | phospholipid phosphatase related 1                                                                                         | -0.096 |
| 672057488 | CD63            | CD63 molecule                                                                                                              | -0.096 |
| 537169371 | N/A             | N/A                                                                                                                        | -0.095 |
| 734703982 | SAFB2           | scaffold attachment factor B2                                                                                              | -0.095 |
| 149060725 | CEP19           | centrosomal protein 19                                                                                                     | -0.095 |
| 197927388 | GART            | phosphoribosylglycinamide formyltransferase, phosphoribosylglycinamide synthetase, phosphoribosylaminoimidazole synthetase | -0.094 |
| 748585198 | DLGAP1          | DLG associated protein 1                                                                                                   | -0.094 |
| 9507157   | STRN            | striatin                                                                                                                   | -0.094 |
| 401461792 | GOT1            | glutamic-oxaloacetic transaminase 1                                                                                        | -0.094 |
| 50402124  | GSR             | glutathione-disulfide reductase                                                                                            | -0.093 |
| 564349386 | N/A             | N/A                                                                                                                        | -0.093 |
| 154800420 | GNL3L           | G protein nucleolar 3 like                                                                                                 | -0.093 |
| 148703191 | HSPA4L          | heat shock protein family A (Hsp70) member 4 like                                                                          | -0.093 |
| 46485440  | GPI             | glucose-6-phosphate isomerase                                                                                              | -0.093 |
| 157819101 | MRPS23          | mitochondrial ribosomal protein S23                                                                                        | -0.092 |
| 149024815 | N/A             | N/A                                                                                                                        | -0.092 |
| 148700731 | ELMO1           | engulfment and cell motility 1                                                                                             | -0.092 |
| 71682358  | HIPK3           | homeodomain interacting protein kinase 3                                                                                   | -0.092 |
| 40363268  | WASHC2A/WASHC2C | WASH complex subunit 2A                                                                                                    | -0.092 |
| 157820113 | RANBP1          | RAN binding protein 1                                                                                                      | -0.092 |
| 148669961 | SLC6A17         | solute carrier family 6 member 17                                                                                          | -0.091 |
| 829972711 | N/A             | N/A                                                                                                                        | -0.091 |
| 300797435 | RNF123          | ring finger protein 123                                                                                                    | -0.091 |
| 148690630 | N/A             | N/A                                                                                                                        | -0.090 |
| 224549858 | Poldip2         | DNA polymerase delta interacting protein 2                                                                                 | -0.090 |
| 148682688 | CDK14           | cyclin dependent kinase 14                                                                                                 | -0.090 |
| 403420618 | NUMA1           | nuclear mitotic apparatus protein 1                                                                                        | -0.090 |
| 274326531 | HSF1            | heat shock transcription factor 1                                                                                          | -0.090 |
| 166201905 | DIS3L           | DIS3 like exosome 3'-5' exoribonuclease                                                                                    | -0.089 |
| 672068112 | N/A             | N/A                                                                                                                        | -0.089 |
| 672089019 | N/A             | N/A                                                                                                                        | -0.089 |
| 6978465   | GRK2            | G protein-coupled receptor kinase 2                                                                                        | -0.089 |
| 166235165 | SYP             | synaptophysin                                                                                                              | -0.089 |
| 16258813  | VHL             | von Hippel-Lindau tumor suppressor                                                                                         | -0.089 |

|           |               |                                                      |        |
|-----------|---------------|------------------------------------------------------|--------|
| 8980843   | GRIPAP1       | GRIP1 associated protein 1                           | -0.089 |
| 149069421 | 2310039H08Rik | RIKEN cDNA 2310039H08 gene                           | -0.089 |
| 18093100  | PLCD4         | phospholipase C delta 4                              | -0.089 |
| 564346506 | AGK           | acylglycerol kinase                                  | -0.088 |
| 6981370   | PLCG1         | phospholipase C gamma 1                              | -0.088 |
| 564350262 | CHD7          | chromodomain helicase DNA binding protein 7          | -0.088 |
| 83649693  | CHST12        | carbohydrate sulfotransferase 12                     | -0.088 |
| 530362302 | KPNA6         | karyopherin subunit alpha 6                          | -0.087 |
| 58865950  | LPCAT3        | lysophosphatidylcholine acyltransferase 3            | -0.087 |
| 308153222 | ARHGEF39      | Rho guanine nucleotide exchange factor 39            | -0.086 |
| 157823007 | EAF1          | ELL associated factor 1                              | -0.086 |
| 12408298  | DPP6          | dipeptidyl peptidase like 6                          | -0.086 |
| 564370751 | HCFC1R1       | host cell factor C1 regulator 1                      | -0.086 |
| 157821255 | RFX5          | regulatory factor X5                                 | -0.086 |
| 635071473 | N/A           | N/A                                                  | -0.085 |
| 926717140 | N/A           | N/A                                                  | -0.085 |
| 521032446 | N/A           | N/A                                                  | -0.085 |
| 89111939  | EXOC1         | exocyst complex component 1                          | -0.085 |
| 157822747 | CLVS1         | clavesin 1                                           | -0.085 |
| 300798083 | RAVER2        | ribonucleoprotein, PTB binding 2                     | -0.084 |
| 926708692 | N/A           | N/A                                                  | -0.084 |
| 195927000 | DLST          | dihydrolipoamide S-succinyltransferase               | -0.084 |
| 16758578  | DPP3          | dipeptidyl peptidase 3                               | -0.084 |
| 157821365 | IFFO1         | intermediate filament family orphan 1                | -0.084 |
| 149022387 | NCKAP1        | NCK associated protein 1                             | -0.084 |
| 564314041 | TMEM44        | transmembrane protein 44                             | -0.084 |
| 568916417 | N/A           | N/A                                                  | -0.083 |
| 564375628 | Foxk2         | forkhead box K2                                      | -0.082 |
| 46485379  | RTCB          | RNA 2',3'-cyclic phosphate and 5'-OH ligase          | -0.082 |
| 55249691  | CPE           | carboxypeptidase E                                   | -0.082 |
| 83404987  | FTH1          | ferritin heavy chain 1                               | -0.082 |
| 50054266  | NLN           | neurolysin                                           | -0.082 |
| 586464862 | N/A           | N/A                                                  | -0.081 |
| 672054308 | N/A           | N/A                                                  | -0.081 |
| 12083661  | ARL3          | ADP ribosylation factor like GTPase 3                | -0.081 |
| 220777    | STX1A         | syntaxin 1A                                          | -0.080 |
| 54035294  | ADH5          | alcohol dehydrogenase 5 (class III), chi polypeptide | -0.080 |
| 926710268 | N/A           | N/A                                                  | -0.080 |
| 913498484 | N/A           | N/A                                                  | -0.080 |

|           |          |                                                            |        |
|-----------|----------|------------------------------------------------------------|--------|
| 672054406 | N/A      | N/A                                                        | -0.079 |
| 564380332 | R3HDM1   | R3H domain containing 1                                    | -0.079 |
| 18034789  | Phkg2    | phosphorylase kinase catalytic subunit gamma 2             | -0.079 |
| 148747375 | CDS1     | CDP-diacylglycerol synthase 1                              | -0.078 |
| 157818189 | CIDEB    | cell death-inducing DFFA-like effector b                   | -0.078 |
| 564354392 | NADK     | NAD kinase                                                 | -0.078 |
| 568906429 | INPP4A   | inositol polyphosphate-4-phosphatase type I A              | -0.077 |
| 625205142 | N/A      | N/A                                                        | -0.077 |
| 149060735 | SEN5     | SUMO1/sentrin specific peptidase 5                         | -0.077 |
| 390979616 | ITGA3    | integrin subunit alpha 3                                   | -0.077 |
| 25742586  | VPS33B   | VPS33B, late endosome and lysosome associated              | -0.076 |
| 568963507 | MAP4     | microtubule associated protein 4                           | -0.076 |
| 564343911 | RPN2     | ribophorin II                                              | -0.076 |
| 568986834 | KCNMA1   | potassium calcium-activated channel subfamily M alpha 1    | -0.075 |
| 392346010 | DNTTIP2  | deoxynucleotidyltransferase terminal interacting protein 2 | -0.075 |
| 57528205  | C12orf43 | chromosome 12 open reading frame 43                        | -0.075 |
| 297206894 | E4F1     | E4F transcription factor 1                                 | -0.074 |
| 672061806 | N/A      | N/A                                                        | -0.073 |
| 13928690  | IDH1     | isocitrate dehydrogenase (NADP(+)) 1, cytosolic            | -0.072 |
| 81870010  | WIPF3    | WAS/WASL interacting protein family member 3               | -0.072 |
| 8394272   | NUDC     | nuclear distribution C, dynein complex regulator           | -0.072 |
| 157817492 | PAK6     | p21 (RAC1) activated kinase 6                              | -0.072 |
| 189011661 | PELI3    | pellino E3 ubiquitin protein ligase family member 3        | -0.071 |
| 34536836  | EHD3     | EH domain containing 3                                     | -0.071 |
| 11559994  | PIK3R3   | phosphoinositide-3-kinase regulatory subunit 3             | -0.070 |
| 564375060 | SLC39A11 | solute carrier family 39 member 11                         | -0.070 |
| 826287877 | N/A      | N/A                                                        | -0.070 |
| 564374948 | MRC2     | mannose receptor C type 2                                  | -0.070 |
| 537137046 | N/A      | N/A                                                        | -0.069 |
| 261337192 | DDX23    | DEAD-box helicase 23                                       | -0.069 |
| 62657153  | EFTUD2   | elongation factor Tu GTP binding domain containing 2       | -0.068 |

|           |                 |                                                                           |        |
|-----------|-----------------|---------------------------------------------------------------------------|--------|
| 672055279 | PREPL           | prolyl endopeptidase like                                                 | -0.068 |
| 188595689 | STK24           | serine/threonine kinase 24                                                | -0.067 |
| 12083643  | Exoc7           | exocyst complex component 7                                               | -0.067 |
| 67846018  | CTNBL1          | catenin beta like 1                                                       | -0.066 |
| 157816897 | UHRF1BP1L       | UHRF1 binding protein 1 like                                              | -0.066 |
| 392339359 | LDLRAD3         | low density lipoprotein receptor class A domain containing 3              | -0.066 |
| 13786182  | FADS2           | fatty acid desaturase 2                                                   | -0.066 |
| 148747528 | PTK2B           | protein tyrosine kinase 2 beta                                            | -0.066 |
| 52138624  | SLC25A20        | solute carrier family 25 member 20                                        | -0.066 |
| 38454252  | MRPS18A         | mitochondrial ribosomal protein S18A                                      | -0.066 |
| 157818729 | SPATA33         | spermatogenesis associated 33                                             | -0.065 |
| 83649771  | Polr1d          | RNA polymerase I subunit D                                                | -0.065 |
| 9507099   | ST6GALNAC3      | ST6 N-acetylgalactosaminide alpha-2,6-sialyltransferase 3                 | -0.065 |
| 564328458 | Ldha/RGD1562690 | lactate dehydrogenase A                                                   | -0.064 |
| 564395373 | TMEM184C        | transmembrane protein 184C                                                | -0.064 |
| 255918181 | NUS1            | NUS1 dehydrodolichyl diphosphate synthase subunit                         | -0.062 |
| 215274190 | PPIB            | peptidylprolyl isomerase B                                                | -0.062 |
| 60360518  | KIF5A           | kinesin family member 5A                                                  | -0.062 |
| 40786465  | YIPF1           | Yip1 domain family member 1                                               | -0.061 |
| 149030689 | N/A             | N/A                                                                       | -0.061 |
| 392352768 | PAPPA2          | pappalysin 2                                                              | -0.060 |
| 300794891 | DDX20           | DEAD-box helicase 20                                                      | -0.060 |
| 77020248  | PFKFB2          | 6-phosphofructo-2-kinase/fructose-2,6-biphosphatase 2                     | -0.060 |
| 20302113  | STIP1           | stress induced phosphoprotein 1                                           | -0.060 |
| 149017294 | Pcdhb7          | protocadherin beta 7                                                      | -0.060 |
| 58865442  | BTBD1           | BTB domain containing 1                                                   | -0.060 |
| 186910247 | MRPS21          | mitochondrial ribosomal protein S21                                       | -0.059 |
| 149040371 | XPNPEP1         | X-prolyl aminopeptidase 1                                                 | -0.059 |
| 29789275  | PDGFRB          | platelet derived growth factor receptor beta                              | -0.059 |
| 161016776 | ATP2A2          | ATPase sarcoplasmic/endoplasmic reticulum Ca <sup>2+</sup> transporting 2 | -0.059 |
| 18543177  | CS              | citrate synthase                                                          | -0.059 |
| 213688386 | GTF2E1          | general transcription factor IIE subunit 1                                | -0.058 |
| 157821073 | IPO9            | importin 9                                                                | -0.058 |
| 408535187 | PRDM11          | PR/SET domain 11                                                          | -0.058 |
| 28212260  | SSX2IP          | SSX family member 2 interacting protein                                   | -0.057 |

|           |          |                                                                    |        |
|-----------|----------|--------------------------------------------------------------------|--------|
| 13385318  | KDELR2   | KDEL endoplasmic reticulum protein retention receptor 2            | -0.057 |
| 149049470 | TPI1     | triosephosphate isomerase 1                                        | -0.057 |
| 157817861 | NDUFA2   | NADH:ubiquinone oxidoreductase subunit A2                          | -0.057 |
| 198278575 | BRCC3    | BRCA1/BRCA2-containing complex subunit 3                           | -0.056 |
| 13027436  | APAF1    | apoptotic peptidase activating factor 1                            | -0.056 |
| 300794036 | TMEM185B | transmembrane protein 185B                                         | -0.056 |
| 157822951 | SPIRE1   | spire type actin nucleation factor 1                               | -0.055 |
| 947288638 | N/A      | N/A                                                                | -0.055 |
| 188536098 | SLC48A1  | solute carrier family 48 member 1                                  | -0.055 |
| 13928838  | TMOD2    | tropomodulin 2                                                     | -0.054 |
| 672065682 | AGAP1    | ArfGAP with GTPase domain, ankyrin repeat and PH domain 1          | -0.053 |
| 148696230 | SNRNP200 | small nuclear ribonucleoprotein U5 subunit 200                     | -0.053 |
| 109460217 | NPM3     | nucleophosmin/nucleoplasmin 3                                      | -0.052 |
| 77627990  | ATP6V0A1 | ATPase H <sup>+</sup> transporting V0 subunit a1                   | -0.052 |
| 149065158 | AHCYL2   | adenosylhomocysteinase like 2                                      | -0.052 |
| 71795619  | SLC19A2  | solute carrier family 19 member 2                                  | -0.052 |
| 83320121  | RBM8A    | RNA binding motif protein 8A                                       | -0.052 |
| 67078460  | PRKRA    | protein activator of interferon induced protein kinase EIF2AK2     | -0.051 |
| 162287208 | FADS1    | fatty acid desaturase 1                                            | -0.050 |
| 9790083   | RUVBL1   | RuvB like AAA ATPase 1                                             | -0.050 |
| 60678266  | ENPP5    | ectonucleotide pyrophosphatase/phosphodiesterase 5 (putative)      | -0.049 |
| 16758168  | FGF13    | fibroblast growth factor 13                                        | -0.049 |
| 880956999 | N/A      | N/A                                                                | -0.049 |
| 18426824  | KHDRBS1  | KH RNA binding domain containing, signal transduction associated 1 | -0.047 |
| 402743461 | DPY19L3  | dpy-19 like C-mannosyltransferase 3                                | -0.046 |
| 77861906  | PLPP6    | phospholipid phosphatase 6                                         | -0.045 |
| 953713397 | AGO1     | argonaute 1, RISC catalytic component                              | -0.045 |
| 157821319 | ATP6V0B  | ATPase H <sup>+</sup> transporting V0 subunit b                    | -0.045 |
| 189027133 | TTC30B   | tetratricopeptide repeat domain 30B                                | -0.044 |
| 157823867 | TLL1     | tolloid like 1                                                     | -0.044 |
| 8394115   | PTS      | 6-pyruvoyltetrahydropterin synthase                                | -0.044 |
| 947289938 | N/A      | N/A                                                                | -0.044 |
| 157820373 | ELK1     | ELK1, ETS transcription factor                                     | -0.043 |

|           |                 |                                                                      |        |
|-----------|-----------------|----------------------------------------------------------------------|--------|
| 20809990  | XPA             | XPA, DNA damage recognition and repair factor                        | -0.043 |
| 672048779 | N/A             | N/A                                                                  | -0.043 |
| 564359598 | OS9             | OS9, endoplasmic reticulum lectin                                    | -0.043 |
| 28189917  | Ubb             | ubiquitin B                                                          | -0.043 |
| 149045755 | CREB3           | cAMP responsive element binding protein 3                            | -0.043 |
| 24638208  | EXOC2           | exocyst complex component 2                                          | -0.041 |
| 20302061  | ATP5PO          | ATP synthase peripheral stalk subunit OSCP                           | -0.040 |
| 82830420  | CTSB            | cathepsin B                                                          | -0.040 |
| 148692627 | N/A             | N/A                                                                  | -0.039 |
| 564391118 | SLC22A23        | solute carrier family 22 member 23                                   | -0.039 |
| 281332197 | Akr1c12/Akr1c13 | aldo-keto reductase family 1, member C13                             | -0.037 |
| 18426858  | SDHA            | succinate dehydrogenase complex flavoprotein subunit A               | -0.037 |
| 62079109  | LANCL2          | LanC like 2                                                          | -0.034 |
| 655862992 | N/A             | N/A                                                                  | -0.033 |
| 537269232 | N/A             | N/A                                                                  | -0.033 |
| 157818471 | PPM1L           | protein phosphatase, Mg <sup>2+</sup> /Mn <sup>2+</sup> dependent 1L | -0.032 |
| 157819901 | STAM            | signal transducing adaptor molecule                                  | -0.031 |
| 124430496 | PRKAR1B         | protein kinase cAMP-dependent type I regulatory subunit beta         | -0.027 |
| 183986109 | USP39           | ubiquitin specific peptidase 39                                      | -0.026 |
| 158534071 | IL4R            | interleukin 4 receptor                                               | -0.025 |
| 57527209  | UBA5            | ubiquitin like modifier activating enzyme 5                          | -0.025 |
| 149047197 | STIM2           | stromal interaction molecule 2                                       | -0.023 |
| 157819063 | SRPK2           | SRSF protein kinase 2                                                | -0.022 |
| 74185161  | PSMC3           | proteasome 26S subunit, ATPase 3                                     | -0.018 |
| 157819459 | MRPS2           | mitochondrial ribosomal protein S2                                   | -0.011 |
| 564301354 | PRRC2B          | proline rich coiled-coil 2B                                          | 0.015  |
| 157820811 | PCDHB14         | protocadherin beta 14                                                | 0.015  |
| 672046138 | N/A             | N/A                                                                  | 0.022  |
| 157818483 | GSPT2           | G1 to S phase transition 2                                           | 0.024  |
| 392333100 | FAM193A         | family with sequence similarity 193 member A                         | 0.027  |
| 564384241 | NOP14           | NOP14 nucleolar protein                                              | 0.029  |
| 58866026  | XK              | X-linked Kx blood group                                              | 0.033  |
| 157817541 | GEMIN4          | gem nuclear organelle associated protein 4                           | 0.033  |
| 12004970  | RNF11           | ring finger protein 11                                               | 0.033  |
| 149022924 | SCG5            | secretogranin V                                                      | 0.034  |
| 672046314 | AMBRA1          | autophagy and beclin 1 regulator 1                                   | 0.034  |



|           |          |                                                                |       |
|-----------|----------|----------------------------------------------------------------|-------|
| 672067583 | N/A      | N/A                                                            | 0.034 |
| 194474082 | RRP7A    | ribosomal RNA processing 7 homolog A                           | 0.034 |
| 392343022 | ZNF157   | zinc finger protein 157                                        | 0.034 |
| 664752274 | N/A      | N/A                                                            | 0.035 |
| 521020961 | N/A      | N/A                                                            | 0.037 |
| 4507133   | SNRPG    | small nuclear ribonucleoprotein polypeptide G                  | 0.037 |
| 148686551 | PPWD1    | peptidylprolyl isomerase domain and WD repeat containing 1     | 0.038 |
| 157821407 | FBXO28   | F-box protein 28                                               | 0.039 |
| 402794761 | ARHGAP35 | Rho GTPase activating protein 35                               | 0.041 |
| 58037463  | KLHDC10  | kelch domain containing 10                                     | 0.041 |
| 199561474 | VPS39    | VPS39, HOPS complex subunit                                    | 0.041 |
| 62945264  | IST1     | IST1, ESCRT-III associated factor                              | 0.042 |
| 157823135 | Dpp8     | dipeptidylpeptidase 8                                          | 0.044 |
| 672066031 | DGKD     | diacylglycerol kinase delta                                    | 0.044 |
| 961766277 | N/A      | N/A                                                            | 0.044 |
| 162135934 | TPST1    | tyrosylprotein sulfotransferase 1                              | 0.044 |
| 157819577 | SAP30BP  | SAP30 binding protein                                          | 0.045 |
| 22129759  | ZWINT    | ZW10 interacting kinetochore protein                           | 0.045 |
| 77627906  | KLHDC2   | kelch domain containing 2                                      | 0.045 |
| 45478098  | CMTR1    | cap methyltransferase 1                                        | 0.046 |
| 183985961 | MAN1B1   | mannosidase alpha class 1B member 1                            | 0.046 |
| 9506875   | SMAD4    | SMAD family member 4                                           | 0.047 |
| 564379423 | N/A      | N/A                                                            | 0.047 |
| 29789096  | PRKAR2A  | protein kinase cAMP-dependent type II regulatory subunit alpha | 0.047 |
| 148698058 | MTFR1L   | mitochondrial fission regulator 1 like                         | 0.048 |
| 300798184 | GRAMD1B  | GRAM domain containing 1B                                      | 0.049 |
| 826351127 | N/A      | N/A                                                            | 0.049 |
| 588480474 | FRG1     | FSHD region gene 1                                             | 0.051 |
| 13591894  | AKR1A1   | aldo-keto reductase family 1 member A1                         | 0.051 |
| 187469177 | WDR41    | WD repeat domain 41                                            | 0.051 |
| 300797122 | FRMD4A   | FERM domain containing 4A                                      | 0.051 |
| 564352872 | N/A      | N/A                                                            | 0.051 |
| 149049696 | MKRN2    | makorin ring finger protein 2                                  | 0.052 |
| 81295337  | SLC25A40 | solute carrier family 25 member 40                             | 0.052 |
| 149052177 | MRPL28   | mitochondrial ribosomal protein L28                            | 0.052 |
| 29825827  | VPS26B   | VPS26, retromer complex component B                            | 0.052 |
| 25742663  | MYT1L    | myelin transcription factor 1 like                             | 0.052 |
| 157820825 | IFT57    | intraflagellar transport 57                                    | 0.053 |

|           |          |                                                     |       |
|-----------|----------|-----------------------------------------------------|-------|
| 20544149  | CSNK1D   | casein kinase 1 delta                               | 0.053 |
| 76443681  | USP11    | ubiquitin specific peptidase 11                     | 0.053 |
| 300798222 | SIAH3    | siah E3 ubiquitin protein ligase family member 3    | 0.054 |
| 50511039  | GNB1L    | G protein subunit beta 1 like                       | 0.054 |
| 148690831 | PRMT1    | protein arginine methyltransferase 1                | 0.054 |
| 157817871 | MEGF9    | multiple EGF like domains 9                         | 0.055 |
| 33468857  | HINT1    | histidine triad nucleotide binding protein 1        | 0.055 |
| 564398411 | N/A      | N/A                                                 | 0.055 |
| 157819325 | SRP68    | signal recognition particle 68                      | 0.056 |
| 672056705 | N/A      | N/A                                                 | 0.056 |
| 55250051  | TXNRD1   | thioredoxin reductase 1                             | 0.056 |
| 148706586 | TMEM178A | transmembrane protein 178A                          | 0.057 |
| 58865796  | PTDSS1   | phosphatidylserine synthase 1                       | 0.057 |
| 18644718  | RGS3     | regulator of G protein signaling 3                  | 0.057 |
| 672073969 | CLASP1   | cytoplasmic linker associated protein 1             | 0.057 |
| 564375166 | N/A      | N/A                                                 | 0.058 |
| 148697565 | FAM83H   | family with sequence similarity 83 member H         | 0.059 |
| 729042261 | KBTBD6   | kelch repeat and BTB domain containing 6            | 0.059 |
| 57527131  | ACTR10   | actin related protein 10 homolog                    | 0.060 |
| 880909835 | N/A      | N/A                                                 | 0.060 |
| 62078979  | AMZ2     | archaelysin family metallopeptidase 2               | 0.061 |
| 564387371 | N/A      | N/A                                                 | 0.062 |
| 8393519   | H2AFY    | H2A histone family member Y                         | 0.062 |
| 189011600 | GPN1     | GPN-loop GTPase 1                                   | 0.063 |
| 157816927 | GMEB1    | glucocorticoid modulatory element binding protein 1 | 0.063 |
| 62078949  | GPC4     | glypican 4                                          | 0.063 |
| 743739270 | N/A      | N/A                                                 | 0.064 |
| 157819485 | PLPPR5   | phospholipid phosphatase related 5                  | 0.064 |
| 293349181 | HINFP    | histone H4 transcription factor                     | 0.065 |
| 149057651 | TFDP1    | transcription factor Dp-1                           | 0.065 |
| 826286778 | N/A      | N/A                                                 | 0.065 |
| 149039803 | UBQLN1   | ubiquilin 1                                         | 0.065 |
| 667245009 | N/A      | N/A                                                 | 0.065 |
| 157822779 | DNAJC11  | DnaJ heat shock protein family (Hsp40) member C11   | 0.066 |
| 25453374  | PEX14    | peroxisomal biogenesis factor 14                    | 0.067 |
| 157821879 | ATF6     | activating transcription factor 6                   | 0.067 |
| 58865660  | SPRY2    | sprouty RTK signaling antagonist 2                  | 0.067 |

|           |          |                                                        |       |
|-----------|----------|--------------------------------------------------------|-------|
| 157786974 | Wdr83os  | WD repeat domain 83 opposite strand                    | 0.067 |
| 61557293  | DNAJB6   | DnaJ heat shock protein family (Hsp40) member B6       | 0.067 |
| 57528331  | MAD2L1BP | MAD2L1 binding protein                                 | 0.068 |
| 37360568  | RANGAP1  | Ran GTPase activating protein 1                        | 0.068 |
| 111494225 | SELENOF  | selenoprotein F                                        | 0.068 |
| 62089200  | ZDHHC9   | zinc finger DHHC-type containing 9                     | 0.068 |
| 70778952  | RAD23B   | RAD23 homolog B, nucleotide excision repair protein    | 0.069 |
| 300797313 | DUSP23   | dual specificity phosphatase 23                        | 0.069 |
| 68163473  | THEM4    | thioesterase superfamily member 4                      | 0.069 |
| 25742568  | DPYSL3   | dihydropyrimidinase like 3                             | 0.069 |
| 157821757 | MRPL20   | mitochondrial ribosomal protein L20                    | 0.070 |
| 764020110 | HNRNPUL2 | heterogeneous nuclear ribonucleoprotein U like 2       | 0.070 |
| 672044697 | EHMT1    | euchromatic histone lysine methyltransferase 1         | 0.070 |
| 149042824 | UBE2V1   | ubiquitin conjugating enzyme E2 V1                     | 0.070 |
| 564356550 | PCNX1    | pecanex homolog 1                                      | 0.070 |
| 564347292 | ST3GAL5  | ST3 beta-galactoside alpha-2,3-sialyltransferase 5     | 0.071 |
| 405113057 | TBCD     | tubulin folding cofactor D                             | 0.071 |
| 392338110 | TBC1D12  | TBC1 domain family member 12                           | 0.071 |
| 149031779 | PRR3     | proline rich 3                                         | 0.072 |
| 8393746   | MAP2K5   | mitogen-activated protein kinase kinase 5              | 0.072 |
| 403420594 | CSRNP3   | cysteine and serine rich nuclear protein 3             | 0.072 |
| 947197810 | N/A      | N/A                                                    | 0.072 |
| 149731291 | N/A      | N/A                                                    | 0.072 |
| 157786896 | FIS1     | fission, mitochondrial 1                               | 0.073 |
| 148668459 | N/A      | N/A                                                    | 0.073 |
| 564313416 | RUNDC1   | RUN domain containing 1                                | 0.073 |
| 537241567 | N/A      | N/A                                                    | 0.073 |
| 564334146 | SLC25A28 | solute carrier family 25 member 28                     | 0.074 |
| 564353714 | FBXO42   | F-box protein 42                                       | 0.074 |
| 47718012  | ATP6AP1  | ATPase H <sup>+</sup> transporting accessory protein 1 | 0.074 |
| 12861068  | CFL1     | cofilin 1                                              | 0.074 |
| 532046645 | N/A      | N/A                                                    | 0.075 |
| 89363040  | PCDHGA11 | protocadherin gamma subfamily A, 11                    | 0.075 |
| 564326269 | RPL28    | ribosomal protein L28                                  | 0.075 |
| 157073957 | PNRC2    | proline rich nuclear receptor coactivator 2            | 0.075 |
| 11120706  | PLRG1    | pleiotropic regulator 1                                | 0.075 |

|           |          |                                                           |       |
|-----------|----------|-----------------------------------------------------------|-------|
| 157822653 | CD2BP2   | CD2 cytoplasmic tail binding protein 2                    | 0.075 |
| 564371002 | CPEB4    | cytoplasmic polyadenylation element binding protein 4     | 0.076 |
| 564366360 | N/A      | N/A                                                       | 0.076 |
| 112984152 | PES1     | pescadillo ribosomal biogenesis factor 1                  | 0.076 |
| 62078453  | INPP5K   | inositol polyphosphate-5-phosphatase K                    | 0.077 |
| 40018592  | HP1BP3   | heterochromatin protein 1 binding protein 3               | 0.077 |
| 564345064 | N/A      | N/A                                                       | 0.078 |
| 109692276 | UBE2E3   | ubiquitin conjugating enzyme E2 E3                        | 0.078 |
| 755492511 | MAP4K4   | mitogen-activated protein kinase kinase kinase kinase 4   | 0.078 |
| 12083657  | BAD      | BCL2 associated agonist of cell death                     | 0.078 |
| 672031258 | N/A      | N/A                                                       | 0.078 |
| 157817783 | SNX18    | sorting nexin 18                                          | 0.079 |
| 68341979  | PLEKHO1  | pleckstrin homology domain containing O1                  | 0.080 |
| 9507059   | RNF5     | ring finger protein 5                                     | 0.080 |
| 119351041 | SYNRG    | synergin gamma                                            | 0.080 |
| 51854215  | RNF34    | ring finger protein 34                                    | 0.080 |
| 148672705 | TMEM184B | transmembrane protein 184B                                | 0.080 |
| 149032182 | TMEM106C | transmembrane protein 106C                                | 0.081 |
| 37360414  | NPLOC4   | NPL4 homolog, ubiquitin recognition factor                | 0.081 |
| 13162349  | ASIC1    | acid sensing ion channel subunit 1                        | 0.082 |
| 351710149 | N/A      | N/A                                                       | 0.082 |
| 169790975 | MRPS9    | mitochondrial ribosomal protein S9                        | 0.082 |
| 83649695  | SMIM14   | small integral membrane protein 14                        | 0.082 |
| 60360532  | OSBPL6   | oxysterol binding protein like 6                          | 0.083 |
| 157820107 | PSMD11   | proteasome 26S subunit, non-ATPase 11                     | 0.083 |
| 672074758 | NCSTN    | nicastrin                                                 | 0.083 |
| 157817696 | PIN1     | peptidylprolyl cis/trans isomerase, NIMA-interacting 1    | 0.083 |
| 672047204 | N/A      | N/A                                                       | 0.083 |
| 148747227 | SV2A     | synaptic vesicle glycoprotein 2A                          | 0.084 |
| 672081581 | RANBP9   | RAN binding protein 9                                     | 0.084 |
| 58865982  | PIGC     | phosphatidylinositol glycan anchor biosynthesis class C   | 0.084 |
| 214010118 | TMEM59   | transmembrane protein 59                                  | 0.085 |
| 564380740 | Ppp1r12b | protein phosphatase 1, regulatory (inhibitor) subunit 12B | 0.085 |
| 528762703 | N/A      | N/A                                                       | 0.085 |

|           |            |                                                         |       |
|-----------|------------|---------------------------------------------------------|-------|
| 157818421 | TVP23A     | trans-golgi network vesicle protein 23 homolog A        | 0.085 |
| 6978449   | ADD2       | adducin 2                                               | 0.085 |
| 149033227 | N/A        | N/A                                                     | 0.085 |
| 157817127 | SOCS5      | suppressor of cytokine signaling 5                      | 0.086 |
| 148709653 | N/A        | N/A                                                     | 0.086 |
| 157818873 | ZNHIT6     | zinc finger HIT-type containing 6                       | 0.086 |
| 672080385 | N/A        | N/A                                                     | 0.086 |
| 148693919 | HMG20A     | high mobility group 20A                                 | 0.086 |
| 48675371  | C1QBP      | complement C1q binding protein                          | 0.086 |
| 564305145 | NOL6       | nucleolar protein 6                                     | 0.086 |
| 148667067 | N/A        | N/A                                                     | 0.087 |
| 149019062 | TMEM30A    | transmembrane protein 30A                               | 0.087 |
| 823394616 | N/A        | N/A                                                     | 0.087 |
| 820973213 | N/A        | N/A                                                     | 0.087 |
| 564386141 | ACIN1      | apoptotic chromatin condensation inducer 1              | 0.088 |
| 157819911 | CSGALNACT2 | chondroitin sulfate N-acetylgalactosaminyltransferase 2 | 0.088 |
| 149048726 | ZNF267     | zinc finger protein 267                                 | 0.088 |
| 401461805 | ACAT1      | acetyl-CoA acetyltransferase 1                          | 0.089 |
| 987959513 | N/A        | N/A                                                     | 0.089 |
| 40786445  | WRB        | tryptophan rich basic protein                           | 0.089 |
| 537231819 | N/A        | N/A                                                     | 0.089 |
| 189163515 | USP47      | ubiquitin specific peptidase 47                         | 0.089 |
| 564325173 | N/A        | N/A                                                     | 0.089 |
| 672040889 | N/A        | N/A                                                     | 0.089 |
| 672075032 | MARK1      | microtubule affinity regulating kinase 1                | 0.089 |
| 758818546 | NFE2L3     | nuclear factor, erythroid 2 like 3                      | 0.090 |
| 112807209 | EXT1       | exostosin glycosyltransferase 1                         | 0.090 |
| 290560659 | ZNF609     | zinc finger protein 609                                 | 0.090 |
| 672066520 | N/A        | N/A                                                     | 0.090 |
| 755756742 | N/A        | N/A                                                     | 0.090 |
| 62078823  | RMDN3      | regulator of microtubule dynamics 3                     | 0.090 |
| 967489450 | MEX3C      | mex-3 RNA binding family member C                       | 0.091 |
| 564387037 | COG3       | component of oligomeric golgi complex 3                 | 0.091 |
| 26346731  | UBE2Z      | ubiquitin conjugating enzyme E2 Z                       | 0.091 |
| 564363529 | NCAM1      | neural cell adhesion molecule 1                         | 0.091 |
| 281604140 | THUMPD3    | THUMP domain containing 3                               | 0.091 |
| 149038024 | RIPOR1     | RHO family interacting cell polarization regulator 1    | 0.091 |

|           |          |                                                        |       |
|-----------|----------|--------------------------------------------------------|-------|
| 149016466 | NIPBL    | NIPBL, cohesin loading factor                          | 0.092 |
| 564311321 | N/A      | N/A                                                    | 0.092 |
| 22024394  | FABP5    | fatty acid binding protein 5                           | 0.092 |
| 564356319 | DAAM1    | dishevelled associated activator of morphogenesis 1    | 0.093 |
| 62543509  | DPH2     | DPH2 homolog                                           | 0.093 |
| 564356795 | ALKBH1   | alkB homolog 1, histone H2A dioxygenase                | 0.094 |
| 640797812 | N/A      | N/A                                                    | 0.094 |
| 795342519 | N/A      | N/A                                                    | 0.094 |
| 564332984 | OSBP     | oxysterol binding protein                              | 0.094 |
| 13385090  | COX6B1   | cytochrome c oxidase subunit 6B1                       | 0.095 |
| 197313691 | XPO6     | exportin 6                                             | 0.095 |
| 60360602  | KLHL20   | kelch like family member 20                            | 0.095 |
| 161760661 | KCNK9    | potassium two pore domain channel subfamily K member 9 | 0.095 |
| 14389301  | SMPD2    | sphingomyelin phosphodiesterase 2                      | 0.096 |
| 672071786 | N/A      | N/A                                                    | 0.096 |
| 528758424 | N/A      | N/A                                                    | 0.096 |
| 672041947 | ZNF704   | zinc finger protein 704                                | 0.096 |
| 189491673 | FXR2     | FMR1 autosomal homolog 2                               | 0.097 |
| 209447030 | DDX27    | DEAD-box helicase 27                                   | 0.097 |
| 982285416 | N/A      | N/A                                                    | 0.097 |
| 157073961 | Nudcd3   | NudC domain containing 3                               | 0.097 |
| 564398783 | USP27X   | ubiquitin specific peptidase 27, X-linked              | 0.098 |
| 62751974  | SNAP29   | synaptosome associated protein 29                      | 0.098 |
| 119618921 | RAN      | RAN, member RAS oncogene family                        | 0.098 |
| 672084054 | N/A      | N/A                                                    | 0.098 |
| 157817586 | USP8     | ubiquitin specific peptidase 8                         | 0.098 |
| 970596961 | MAPK10   | mitogen-activated protein kinase 10                    | 0.099 |
| 291084664 | TRAPPC10 | trafficking protein particle complex 10                | 0.099 |
| 157818285 | C12orf49 | chromosome 12 open reading frame 49                    | 0.099 |
| 528767051 | N/A      | N/A                                                    | 0.100 |
| 12621140  | PIK3C3   | phosphatidylinositol 3-kinase catalytic subunit type 3 | 0.100 |
| 300797976 | ANKRD50  | ankyrin repeat domain 50                               | 0.100 |
| 13994121  | FEZ1     | fasciculation and elongation protein zeta 1            | 0.100 |
| 241666404 | EPHA4    | EPH receptor A4                                        | 0.100 |
| 725607246 | N/A      | N/A                                                    | 0.100 |
| 564352364 | N/A      | N/A                                                    | 0.100 |
| 157822179 | COMMD8   | COMM domain containing 8                               | 0.100 |

|           |         |                                                                  |       |
|-----------|---------|------------------------------------------------------------------|-------|
| 564361208 | SCUBE1  | signal peptide, CUB domain and EGF like domain containing 1      | 0.100 |
| 114145722 | RTRAF   | RNA transcription, translation and transport factor              | 0.100 |
| 655605091 | N/A     | N/A                                                              | 0.100 |
| 564338596 | N/A     | N/A                                                              | 0.101 |
| 514475096 | N/A     | N/A                                                              | 0.101 |
| 347921120 | SLC23A2 | solute carrier family 23 member 2                                | 0.101 |
| 71043624  | AZI2    | 5-azacytidine induced 2                                          | 0.101 |
| 166064004 | GTF3A   | general transcription factor IIIA                                | 0.101 |
| 164565398 | RBFOX1  | RNA binding fox-1 homolog 1                                      | 0.101 |
| 672063576 | N/A     | N/A                                                              | 0.102 |
| 57164027  | PMS1    | PMS1 homolog 1, mismatch repair system component                 | 0.102 |
| 157819591 | PARP6   | poly(ADP-ribose) polymerase family member 6                      | 0.102 |
| 22096326  | PRKAB1  | protein kinase AMP-activated non-catalytic subunit beta 1        | 0.102 |
| 431895484 | N/A     | N/A                                                              | 0.103 |
| 27545414  | LGR4    | leucine rich repeat containing G protein-coupled receptor 4      | 0.103 |
| 585165276 | N/A     | N/A                                                              | 0.103 |
| 28972173  | KIF3B   | kinesin family member 3B                                         | 0.103 |
| 795356643 | N/A     | N/A                                                              | 0.103 |
| 672047825 | N/A     | N/A                                                              | 0.103 |
| 564368059 | KANSL3  | KAT8 regulatory NSL complex subunit 3                            | 0.103 |
| 157821483 | BORCS5  | BLOC-1 related complex subunit 5                                 | 0.103 |
| 148697875 | GDI1    | GDP dissociation inhibitor 1                                     | 0.103 |
| 58865572  | FBXO9   | F-box protein 9                                                  | 0.104 |
| 803119291 | N/A     | N/A                                                              | 0.104 |
| 58865712  | RRP1    | ribosomal RNA processing 1                                       | 0.104 |
| 70794762  | HARS    | histidyl-tRNA synthetase                                         | 0.104 |
| 564352682 | PABPC4  | poly(A) binding protein cytoplasmic 4                            | 0.104 |
| 966932741 | TMED4   | transmembrane p24 trafficking protein 4                          | 0.105 |
| 46391106  | ARL10   | ADP ribosylation factor like GTPase 10                           | 0.105 |
| 564367956 | CNNM3   | cyclin and CBS domain divalent metal cation transport mediator 3 | 0.105 |
| 80751173  | PCDHGA1 | protocadherin gamma subfamily A, 1                               | 0.106 |
| 149047559 | MTMR3   | myotubularin related protein 3                                   | 0.106 |
| 157821137 | TMEM128 | transmembrane protein 128                                        | 0.106 |
| 42476292  | TALDO1  | transaldolase 1                                                  | 0.106 |

|           |          |                                                                   |       |
|-----------|----------|-------------------------------------------------------------------|-------|
| 564358970 | CDK17    | cyclin dependent kinase 17                                        | 0.107 |
| 149040413 | GPAM     | glycerol-3-phosphate acyltransferase, mitochondrial               | 0.107 |
| 803119291 | N/A      | N/A                                                               | 0.107 |
| 672054841 | RCC2     | regulator of chromosome condensation 2                            | 0.107 |
| 564382285 | RPS6KC1  | ribosomal protein S6 kinase C1                                    | 0.107 |
| 564377243 | OPA1     | OPA1, mitochondrial dynamin like GTPase                           | 0.107 |
| 444730664 | N/A      | N/A                                                               | 0.107 |
| 431917236 | N/A      | N/A                                                               | 0.107 |
| 431917236 | N/A      | N/A                                                               | 0.107 |
| 86477155  | PER1     | period circadian regulator 1                                      | 0.108 |
| 62543537  | TBC1D10A | TBC1 domain family member 10A                                     | 0.108 |
| 831324638 | N/A      | N/A                                                               | 0.108 |
| 831234449 | N/A      | N/A                                                               | 0.108 |
| 148673403 | GRSF1    | G-rich RNA sequence binding factor 1                              | 0.108 |
| 61889115  | PSAT1    | phosphoserine aminotransferase 1                                  | 0.108 |
| 149063993 | NEDD8    | neural precursor cell expressed, developmentally down-regulated 8 | 0.109 |
| 19526763  | CRCP     | CGRP receptor component                                           | 0.109 |
| 157822563 | AREL1    | apoptosis resistant E3 ubiquitin protein ligase 1                 | 0.109 |
| 564320563 | RBM27    | RNA binding motif protein 27                                      | 0.109 |
| 927205201 | N/A      | N/A                                                               | 0.110 |
| 402534556 | ZHX2     | zinc fingers and homeoboxes 2                                     | 0.110 |
| 41054868  | FPGT     | fucose-1-phosphate guanylyltransferase                            | 0.110 |
| 158631164 | IGSF3    | immunoglobulin superfamily member 3                               | 0.110 |
| 157818159 | AAR2     | AAR2 splicing factor homolog                                      | 0.110 |
| 149046938 | N/A      | N/A                                                               | 0.110 |
| 672050419 | SLC6A6   | solute carrier family 6 member 6                                  | 0.110 |
| 955507084 | N/A      | N/A                                                               | 0.110 |
| 38454206  | PSMD6    | proteasome 26S subunit, non-ATPase 6                              | 0.110 |
| 672027713 | BMP2K    | BMP2 inducible kinase                                             | 0.111 |
| 157786720 | HIVEP1   | human immunodeficiency virus type I enhancer binding protein 1    | 0.111 |
| 686661085 | MTMR4    | myotubularin related protein 4                                    | 0.111 |
| 564336099 | PHC3     | polyhomeotic homolog 3                                            | 0.112 |
| 672048159 | RAE1     | ribonucleic acid export 1                                         | 0.112 |
| 927219744 | N/A      | N/A                                                               | 0.112 |
| 13928860  | IGBP1    | immunoglobulin binding protein 1                                  | 0.112 |
| 30794434  | SRRM4    | serine/arginine repetitive matrix 4                               | 0.112 |



|           |         |                                                      |       |
|-----------|---------|------------------------------------------------------|-------|
| 564388185 | ERCC6   | ERCC excision repair 6, chromatin remodeling factor  | 0.112 |
| 90108450  | TAB2    | TGF-beta activated kinase 1/MAP3K7 binding protein 2 | 0.113 |
| 594064744 | N/A     | N/A                                                  | 0.113 |
| 158341666 | SEL1L   | SEL1L ERAD E3 ligase adaptor subunit                 | 0.113 |
| 157817811 | C5orf22 | chromosome 5 open reading frame 22                   | 0.113 |
| 880893486 | N/A     | N/A                                                  | 0.114 |
| 56090369  | TMX2    | thioredoxin related transmembrane protein 2          | 0.114 |
| 170295834 | NDUFA10 | NADH:ubiquinone oxidoreductase subunit A10           | 0.114 |
| 611991798 | N/A     | N/A                                                  | 0.114 |
| 78214352  | CSRP2   | cysteine and glycine rich protein 2                  | 0.114 |
| 274325505 | Pwp2    | PWP2 periodic tryptophan protein homolog (yeast)     | 0.115 |
| 67078504  | YTHDF1  | YTH N6-methyladenosine RNA binding protein 1         | 0.115 |
| 564309116 | RTL6    | retrotransposon Gag like 6                           | 0.115 |
| 564360651 | LRRC14  | leucine rich repeat containing 14                    | 0.115 |
| 51948396  | TUSC3   | tumor suppressor candidate 3                         | 0.116 |
| 725571770 | N/A     | N/A                                                  | 0.116 |
| 955478861 | N/A     | N/A                                                  | 0.116 |
| 53828922  | PCYT1A  | phosphate cytidylyltransferase 1, choline, alpha     | 0.116 |
| 564317984 | N/A     | N/A                                                  | 0.116 |
| 672067122 | N/A     | N/A                                                  | 0.116 |
| 674097005 | N/A     | N/A                                                  | 0.116 |
| 25742739  | ACSL1   | acyl-CoA synthetase long chain family member 1       | 0.117 |
| 564353232 | PUM1    | pumilio RNA binding family member 1                  | 0.117 |
| 293347618 | RLF     | rearranged L-myc fusion                              | 0.117 |
| 755502295 | SAMD10  | sterile alpha motif domain containing 10             | 0.117 |
| 189011602 | NLE1    | notchless homolog 1                                  | 0.118 |
| 274321371 | CRLF3   | cytokine receptor like factor 3                      | 0.118 |
| 397524574 | N/A     | N/A                                                  | 0.118 |
| 81158095  | PCDHGA3 | protocadherin gamma subfamily A, 3                   | 0.118 |
| 47847438  | EXOC3   | exocyst complex component 3                          | 0.118 |
| 564372486 | N/A     | N/A                                                  | 0.118 |
| 68163425  | TMEM199 | transmembrane protein 199                            | 0.118 |
| 564358968 | N/A     | N/A                                                  | 0.118 |
| 403224979 | PPP4R3A | protein phosphatase 4 regulatory subunit 3A          | 0.118 |
| 11067423  | SMAD5   | SMAD family member 5                                 | 0.118 |

|           |               |                                                       |       |
|-----------|---------------|-------------------------------------------------------|-------|
| 18959272  | KCNQ2         | potassium voltage-gated channel subfamily Q member 2  | 0.119 |
| 672040889 | N/A           | N/A                                                   | 0.119 |
| 40018576  | TOR1AIP2      | torsin 1A interacting protein 2                       | 0.119 |
| 300793721 | TLK2          | tousled like kinase 2                                 | 0.119 |
| 401709965 | ANXA3         | annexin A3                                            | 0.119 |
| 404501464 | IFNAR1        | interferon alpha and beta receptor subunit 1          | 0.119 |
| 507693337 | N/A           | N/A                                                   | 0.120 |
| 157816973 | PPP1R8        | protein phosphatase 1 regulatory subunit 8            | 0.120 |
| 532015294 | N/A           | N/A                                                   | 0.120 |
| 157818061 | 2510002D24Rik | RIKEN cDNA 2510002D24 gene                            | 0.120 |
| 61556860  | MRPL46        | mitochondrial ribosomal protein L46                   | 0.120 |
| 149050200 | GPR180        | G protein-coupled receptor 180                        | 0.120 |
| 58865512  | STRAP         | serine/threonine kinase receptor associated protein   | 0.120 |
| 13242293  | HMGCL         | 3-hydroxymethyl-3-methylglutaryl-CoA lyase            | 0.121 |
| 66730484  | TAOK3         | TAO kinase 3                                          | 0.121 |
| 293344794 | FAM160B1      | family with sequence similarity 160 member B1         | 0.121 |
| 109510888 | FAM155B       | family with sequence similarity 155 member B          | 0.121 |
| 402743472 | SLC3A2        | solute carrier family 3 member 2                      | 0.121 |
| 562828743 | N/A           | N/A                                                   | 0.121 |
| 148680747 | ANKFY1        | ankyrin repeat and FYVE domain containing 1           | 0.122 |
| 672045179 | MAPKAP1       | mitogen-activated protein kinase associated protein 1 | 0.122 |
| 157822659 | RIOK3         | RIO kinase 3                                          | 0.122 |
| 564319816 | N/A           | N/A                                                   | 0.122 |
| 58865648  | SAMD8         | sterile alpha motif domain containing 8               | 0.122 |
| 555997205 | N/A           | N/A                                                   | 0.122 |
| 641719431 | N/A           | N/A                                                   | 0.122 |
| 114326177 | SHMT1         | serine hydroxymethyltransferase 1                     | 0.123 |
| 148704614 | N/A           | N/A                                                   | 0.123 |
| 672017866 | DIDO1         | death inducer-obliterator 1                           | 0.123 |
| 942047300 | N/A           | N/A                                                   | 0.123 |
| 672060579 | SEN1          | SUMO1/sentrin specific peptidase 1                    | 0.123 |
| 392347634 | CHD4          | chromodomain helicase DNA binding protein 4           | 0.124 |
| 18041977  | Serbp1        | Serpine1 mRNA binding protein 1                       | 0.124 |
| 672073083 | N/A           | N/A                                                   | 0.124 |
| 393716310 | WAC           | WW domain containing adaptor with coiled-coil         | 0.124 |
| 672044181 | HS2ST1        | heparan sulfate 2-O-sulfotransferase 1                | 0.124 |

|           |           |                                                                                        |       |
|-----------|-----------|----------------------------------------------------------------------------------------|-------|
| 109479851 | NRDE2     | NRDE-2, necessary for RNA interference, domain containing                              | 0.124 |
| 162287304 | CDC42EP3  | CDC42 effector protein 3                                                               | 0.124 |
| 60359872  | G3BP1     | G3BP stress granule assembly factor 1                                                  | 0.125 |
| 755530088 | N/A       | N/A                                                                                    | 0.125 |
| 25742623  | UGCG      | UDP-glucose ceramide glucosyltransferase                                               | 0.125 |
| 148705576 | CRMP1     | collapsin response mediator protein 1                                                  | 0.125 |
| 164664442 | PIAS1     | protein inhibitor of activated STAT 1                                                  | 0.125 |
| 655660415 | N/A       | N/A                                                                                    | 0.125 |
| 564381925 | ACKR1     | atypical chemokine receptor 1 (Duffy blood group)                                      | 0.125 |
| 157818629 | HEYL      | hes related family bHLH transcription factor with YRPW motif-like                      | 0.126 |
| 564328894 | N/A       | N/A                                                                                    | 0.126 |
| 157817011 | LRRC28    | leucine rich repeat containing 28                                                      | 0.126 |
| 155369279 | RSPRY1    | ring finger and SPRY domain containing 1                                               | 0.126 |
| 19705555  | IPMK      | inositol polyphosphate multikinase                                                     | 0.126 |
| 149016735 | N/A       | N/A                                                                                    | 0.127 |
| 11968114  | MRPL23    | mitochondrial ribosomal protein L23                                                    | 0.127 |
| 209977101 | TRPM4     | transient receptor potential cation channel subfamily M member 4                       | 0.127 |
| 58866022  | MGAT4A    | mannosyl (alpha-1,3-)-glycoprotein beta-1,4-N-acetylglucosaminyltransferase, isozyme A | 0.127 |
| 454601639 | NCOA6     | nuclear receptor coactivator 6                                                         | 0.127 |
| 16758194  | RGS2      | regulator of G protein signaling 2                                                     | 0.127 |
| 672068548 | SUPT6H    | SPT6 homolog, histone chaperone                                                        | 0.127 |
| 768711622 | MPEG1     | macrophage expressed 1                                                                 | 0.128 |
| 564361244 | TCF20     | transcription factor 20                                                                | 0.128 |
| 51036652  | SLC33A1   | solute carrier family 33 member 1                                                      | 0.128 |
| 564331450 | EEF1AKMT2 | EEF1A lysine methyltransferase 2                                                       | 0.129 |
| 148677380 | MSANTD4   | Myb/SANT DNA binding domain containing 4 with coiled-coils                             | 0.129 |
| 162138924 | YKT6      | YKT6 v-SNARE homolog                                                                   | 0.129 |
| 270483894 | CAMSAP1   | calmodulin regulated spectrin associated protein 1                                     | 0.129 |
| 568957557 | N/A       | N/A                                                                                    | 0.129 |
| 148747275 | MCM7      | minichromosome maintenance complex component 7                                         | 0.130 |
| 564361462 | BRD1      | bromodomain containing 1                                                               | 0.130 |
| 672049965 | N/A       | N/A                                                                                    | 0.130 |

|           |          |                                                                                  |       |
|-----------|----------|----------------------------------------------------------------------------------|-------|
| 23271707  | EIF3B    | eukaryotic translation initiation factor 3 subunit B                             | 0.130 |
| 76008363  | BICD2    | BICD cargo adaptor 2                                                             | 0.130 |
| 672042705 | FNIP2    | folliculin interacting protein 2                                                 | 0.130 |
| 62656582  | KIAA0100 | KIAA0100                                                                         | 0.130 |
| 564363852 | SNUPN    | snurportin 1                                                                     | 0.131 |
| 300797157 | TBC1D8   | TBC1 domain family member 8                                                      | 0.131 |
| 325974480 | NDUFA7   | NADH:ubiquinone oxidoreductase subunit A7                                        | 0.131 |
| 672063411 | SETD2    | SET domain containing 2                                                          | 0.131 |
| 157821015 | KDM5B    | lysine demethylase 5B                                                            | 0.131 |
| 60359978  | KIF3C    | kinesin family member 3C                                                         | 0.131 |
| 148693260 | TIMM29   | translocase of inner mitochondrial membrane 29                                   | 0.131 |
| 17978459  | Atp5k    | ATP synthase, H <sup>+</sup> transporting, mitochondrial F1F0 complex, subunit E | 0.131 |
| 157824037 | USP4     | ubiquitin specific peptidase 4                                                   | 0.131 |
| 68299787  | TAF9     | TATA-box binding protein associated factor 9                                     | 0.131 |
| 564396315 | TAF5L    | TATA-box binding protein associated factor 5 like                                | 0.132 |
| 157821561 | ATRIP    | ATR interacting protein                                                          | 0.132 |
| 589941671 | N/A      | N/A                                                                              | 0.132 |
| 77404259  | RPAP1    | RNA polymerase II associated protein 1                                           | 0.132 |
| 625263830 | N/A      | N/A                                                                              | 0.132 |
| 564390552 | N/A      | N/A                                                                              | 0.133 |
| 564333160 | TMEM2    | transmembrane protein 2                                                          | 0.133 |
| 440890867 | N/A      | N/A                                                                              | 0.133 |
| 83582792  | FAM117B  | family with sequence similarity 117 member B                                     | 0.133 |
| 158749598 | LRIG2    | leucine rich repeats and immunoglobulin like domains 2                           | 0.133 |
| 58865976  | KLHDC3   | kelch domain containing 3                                                        | 0.133 |
| 11177894  | TSC1     | TSC complex subunit 1                                                            | 0.134 |
| 149036172 | FAM32A   | family with sequence similarity 32 member A                                      | 0.134 |
| 150421568 | N/A      | N/A                                                                              | 0.134 |
| 50510937  | MBD5     | methyl-CpG binding domain protein 5                                              | 0.134 |
| 564397283 | FKBP5    | FK506 binding protein 5                                                          | 0.134 |
| 157823607 | ALDH18A1 | aldehyde dehydrogenase 18 family member A1                                       | 0.134 |
| 8394405   | SLC7A5   | solute carrier family 7 member 5                                                 | 0.134 |
| 148682677 | MTERF1   | mitochondrial transcription termination factor 1                                 | 0.135 |

|           |          |                                                                                                 |       |
|-----------|----------|-------------------------------------------------------------------------------------------------|-------|
| 149018452 | SMARCC1  | SWI/SNF related, matrix associated, actin dependent regulator of chromatin subfamily c member 1 | 0.135 |
| 13242322  | ATF4     | activating transcription factor 4                                                               | 0.135 |
| 162287067 | VAV1     | vav guanine nucleotide exchange factor 1                                                        | 0.135 |
| 29293823  | SMUG1    | single-strand-selective monofunctional uracil-DNA glycosylase 1                                 | 0.135 |
| 564398269 | SCML4    | Scm polycomb group protein like 4                                                               | 0.135 |
| 451770387 | PRRT2    | proline rich transmembrane protein 2                                                            | 0.136 |
| 61557130  | B3GALNT1 | beta-1,3-N-acetylgalactosaminyltransferase 1 (globoside blood group)                            | 0.136 |
| 14010879  | PSMD1    | proteasome 26S subunit, non-ATPase 1                                                            | 0.136 |
| 148747116 | BIRC2    | baculoviral IAP repeat containing 2                                                             | 0.136 |
| 61556945  | MOAP1    | modulator of apoptosis 1                                                                        | 0.136 |
| 157786872 | USP42    | ubiquitin specific peptidase 42                                                                 | 0.136 |
| 157821401 | UQCC1    | ubiquinol-cytochrome c reductase complex assembly factor 1                                      | 0.136 |
| 18266706  | ELP1     | elongator complex protein 1                                                                     | 0.137 |
| 564398139 | FYN      | FYN proto-oncogene, Src family tyrosine kinase                                                  | 0.137 |
| 537206173 | N/A      | N/A                                                                                             | 0.137 |
| 157816981 | DNAJC30  | DnaJ heat shock protein family (Hsp40) member C30                                               | 0.137 |
| 67078426  | SPIN1    | spindlin 1                                                                                      | 0.137 |
| 71043634  | PDCL3    | phosducin like 3                                                                                | 0.137 |
| 672060460 | N/A      | N/A                                                                                             | 0.137 |
| 148491097 | DYNC1H1  | dynein cytoplasmic 1 heavy chain 1                                                              | 0.137 |
| 674070361 | N/A      | N/A                                                                                             | 0.137 |
| 157786686 | KLHL11   | kelch like family member 11                                                                     | 0.138 |
| 795270501 | N/A      | N/A                                                                                             | 0.138 |
| 470611927 | N/A      | N/A                                                                                             | 0.138 |
| 16758782  | LMNB1    | lamin B1                                                                                        | 0.138 |
| 564393026 | BRD8     | bromodomain containing 8                                                                        | 0.138 |
| 77404168  | WDR77    | WD repeat domain 77                                                                             | 0.138 |
| 58865952  | UBAP1    | ubiquitin associated protein 1                                                                  | 0.139 |
| 158081739 | B4GALT1  | beta-1,4-galactosyltransferase 1                                                                | 0.140 |
| 157818305 | GPR101   | G protein-coupled receptor 101                                                                  | 0.140 |
| 672069253 | SOCS7    | suppressor of cytokine signaling 7                                                              | 0.141 |

|           |           |                                                                                                      |       |
|-----------|-----------|------------------------------------------------------------------------------------------------------|-------|
| 157820897 | MTHFD2    | methylenetetrahydrofolate dehydrogenase (NADP+ dependent) 2, methenyltetrahydrofolate cyclohydrolase | 0.141 |
| 672082436 | N/A       | N/A                                                                                                  | 0.141 |
| 795288364 | N/A       | N/A                                                                                                  | 0.141 |
| 157821921 | QSOX2     | quiescin sulfhydryl oxidase 2                                                                        | 0.141 |
| 58865606  | FTSJ3     | FtsJ RNA methyltransferase homolog 3                                                                 | 0.141 |
| 155369738 | VPS33A    | VPS33A, CORVET/HOPS core subunit                                                                     | 0.141 |
| 20301952  | SLC2A1    | solute carrier family 2 member 1                                                                     | 0.142 |
| 149025632 | RBM15     | RNA binding motif protein 15                                                                         | 0.142 |
| 19924073  | TTL       | tubulin tyrosine ligase                                                                              | 0.142 |
| 451172120 | DUSP7     | dual specificity phosphatase 7                                                                       | 0.142 |
| 60360118  | FAM168B   | family with sequence similarity 168 member B                                                         | 0.142 |
| 56090235  | UBAC1     | UBA domain containing 1                                                                              | 0.142 |
| 61555249  | NUDT11    | nudix hydrolase 11                                                                                   | 0.142 |
| 157819431 | BRD3      | bromodomain containing 3                                                                             | 0.142 |
| 40385881  | ACVR1B    | activin A receptor type 1B                                                                           | 0.143 |
| 213972547 | KAT6A     | lysine acetyltransferase 6A                                                                          | 0.143 |
| 71043834  | RBMX      | RNA binding motif protein, X-linked                                                                  | 0.143 |
| 655872066 | N/A       | N/A                                                                                                  | 0.143 |
| 74139306  | TMED9     | transmembrane p24 trafficking protein 9                                                              | 0.143 |
| 672056381 | PCNX4     | pecanex homolog 4                                                                                    | 0.143 |
| 157073939 | LOC728392 | uncharacterized LOC728392                                                                            | 0.143 |
| 987429374 | N/A       | N/A                                                                                                  | 0.144 |
| 564370907 | ZNF598    | zinc finger protein 598                                                                              | 0.144 |
| 9624979   | ENSA      | endosulfine alpha                                                                                    | 0.144 |
| 46485444  | NOP53     | NOP53 ribosome biogenesis factor                                                                     | 0.144 |
| 55715816  | GLYR1     | glyoxylate reductase 1 homolog                                                                       | 0.144 |
| 6981458   | RAF1      | Raf-1 proto-oncogene, serine/threonine kinase                                                        | 0.144 |
| 625279732 | N/A       | N/A                                                                                                  | 0.144 |
| 12408292  | PGR       | progesterone receptor                                                                                | 0.144 |
| 676272934 | N/A       | N/A                                                                                                  | 0.144 |
| 149018374 | N/A       | N/A                                                                                                  | 0.145 |
| 674066860 | N/A       | N/A                                                                                                  | 0.145 |
| 291042494 | MED13L    | mediator complex subunit 13 like                                                                     | 0.145 |
| 672052423 | N/A       | N/A                                                                                                  | 0.145 |
| 742149236 | N/A       | N/A                                                                                                  | 0.145 |
| 149049279 | N/A       | N/A                                                                                                  | 0.145 |
| 157821933 | EXOG      | exo/endonuclease G                                                                                   | 0.145 |
| 672024670 | FAM196B   | family with sequence similarity 196 member B                                                         | 0.145 |

|           |          |                                                                                 |       |
|-----------|----------|---------------------------------------------------------------------------------|-------|
| 68534951  | CD40     | CD40 molecule                                                                   | 0.145 |
| 30017419  | NREP     | neuronal regeneration related protein                                           | 0.145 |
| 744598167 | N/A      | N/A                                                                             | 0.145 |
| 507680885 | N/A      | N/A                                                                             | 0.146 |
| 392333209 | DLG5     | discs large MAGUK scaffold protein 5                                            | 0.146 |
| 399124804 | SLC4A8   | solute carrier family 4 member 8                                                | 0.146 |
| 157818521 | COG8     | component of oligomeric golgi complex 8                                         | 0.146 |
| 157820585 | SART3    | squamous cell carcinoma antigen recognized by T cells 3                         | 0.146 |
| 157786906 | MRPS17   | mitochondrial ribosomal protein S17                                             | 0.146 |
| 84781731  | ZDHHC3   | zinc finger DHHC-type containing 3                                              | 0.146 |
| 672088463 | N/A      | N/A                                                                             | 0.146 |
| 13928926  | MYBBP1A  | MYB binding protein 1a                                                          | 0.146 |
| 966923099 | SMG7     | SMG7, nonsense mediated mRNA decay factor                                       | 0.146 |
| 426382957 | N/A      | N/A                                                                             | 0.147 |
| 914896367 | N/A      | N/A                                                                             | 0.147 |
| 149064388 | Hmgxb3   | HMG-box containing 3                                                            | 0.147 |
| 300798201 | PYGO1    | pygopus family PHD finger 1                                                     | 0.147 |
| 148747154 | POLB     | DNA polymerase beta                                                             | 0.147 |
| 148679302 | CBFB     | core-binding factor beta subunit                                                | 0.148 |
| 157818165 | SMURF2   | SMAD specific E3 ubiquitin protein ligase 2                                     | 0.148 |
| 62079033  | PRMT7    | protein arginine methyltransferase 7                                            | 0.148 |
| 403225011 | SAMHD1   | SAM and HD domain containing deoxynucleoside triphosphate triphosphohydrolase 1 | 0.148 |
| 41386755  | FGFR1OP2 | FGFR1 oncogene partner 2                                                        | 0.148 |
| 293341411 | Rc3h1    | ring finger and CCCH-type domains 1                                             | 0.148 |
| 61556879  | PKNOX1   | PBX/knotted 1 homeobox 1                                                        | 0.148 |
| 155369656 | AQR      | aquarius intron-binding spliceosomal factor                                     | 0.149 |
| 564319708 | N/A      | N/A                                                                             | 0.149 |
| 149022577 | FNBP4    | formin binding protein 4                                                        | 0.149 |
| 148665617 | NAA50    | N(alpha)-acetyltransferase 50, NatE catalytic subunit                           | 0.149 |
| 281427188 | ZC3H13   | zinc finger CCCH-type containing 13                                             | 0.149 |
| 114145618 | MIS12    | MIS12, kinetochore complex component                                            | 0.149 |
| 149722114 | N/A      | N/A                                                                             | 0.149 |
| 564321656 | TCF25    | transcription factor 25                                                         | 0.149 |
| 68342005  | HEXIM1   | hexamethylene bisacetamide inducible 1                                          | 0.150 |
| 404351673 | PPP1R21  | protein phosphatase 1 regulatory subunit 21                                     | 0.150 |
| 157819885 | SETD5    | SET domain containing 5                                                         | 0.150 |

|           |               |                                                                         |       |
|-----------|---------------|-------------------------------------------------------------------------|-------|
| 157821581 | PSMD13        | proteasome 26S subunit, non-ATPase 13                                   | 0.150 |
| 40786455  | BPGM          | bisphosphoglycerate mutase                                              | 0.150 |
| 564311031 | CLPP          | caseinolytic mitochondrial matrix peptidase proteolytic subunit         | 0.150 |
| 392351939 | BRWD1         | bromodomain and WD repeat domain containing 1                           | 0.150 |
| 114051946 | YTHDF2        | YTH N6-methyladenosine RNA binding protein 2                            | 0.150 |
| 157819423 | SPSB3         | splA/ryanodine receptor domain and SOCS box containing 3                | 0.150 |
| 755537448 | N/A           | N/A                                                                     | 0.151 |
| 198278505 | RPL7          | ribosomal protein L7                                                    | 0.151 |
| 82654218  | AIMP2         | aminoacyl tRNA synthetase complex interacting multifunctional protein 2 | 0.151 |
| 208973276 | TMEM185A      | transmembrane protein 185A                                              | 0.151 |
| 76363516  | FEZ2          | fasciculation and elongation protein zeta 2                             | 0.152 |
| 16758772  | CGRRF1        | cell growth regulator with ring finger domain 1                         | 0.152 |
| 157820079 | C14orf28      | chromosome 14 open reading frame 28                                     | 0.152 |
| 795554188 | N/A           | N/A                                                                     | 0.152 |
| 157823453 | RBSN          | rabenosyn, RAB effector                                                 | 0.152 |
| 55741780  | SPG21         | SPG21, maspardin                                                        | 0.152 |
| 918594634 | N/A           | N/A                                                                     | 0.153 |
| 918577634 | N/A           | N/A                                                                     | 0.153 |
| 829979268 | N/A           | N/A                                                                     | 0.153 |
| 568918679 | TTC17         | tetratricopeptide repeat domain 17                                      | 0.153 |
| 157820865 | DDX28         | DEAD-box helicase 28                                                    | 0.153 |
| 617592859 | N/A           | N/A                                                                     | 0.153 |
| 51036650  | MCL1          | MCL1, BCL2 family apoptosis regulator                                   | 0.153 |
| 564394905 | ZSWIM4        | zinc finger SWIM-type containing 4                                      | 0.153 |
| 261337195 | WDR91         | WD repeat domain 91                                                     | 0.153 |
| 157817718 | DCAF10        | DDB1 and CUL4 associated factor 10                                      | 0.153 |
| 149024327 | C1QB          | complement C1q B chain                                                  | 0.154 |
| 13928696  | JAK2          | Janus kinase 2                                                          | 0.154 |
| 300253233 | LEMD3         | LEM domain containing 3                                                 | 0.154 |
| 148679797 | DEF8          | differentially expressed in FDCP 8 homolog                              | 0.155 |
| 2088637   | EED           | embryonic ectoderm development                                          | 0.155 |
| 66730376  | Arxes1/Arxes2 | adipocyte-related X-chromosome expressed sequence 2                     | 0.155 |
| 209863130 | SEMA3F        | semaphorin 3F                                                           | 0.155 |
| 50511177  | SLITRK1       | SLIT and NTRK like family member 1                                      | 0.155 |



|           |          |                                                                       |       |
|-----------|----------|-----------------------------------------------------------------------|-------|
| 564361543 | PPHLN1   | periphilin 1                                                          | 0.155 |
| 148702702 | N/A      | N/A                                                                   | 0.156 |
| 402692225 | RNF168   | ring finger protein 168                                               | 0.156 |
| 70608151  | FAM118B  | family with sequence similarity 118 member B                          | 0.156 |
| 50510427  | IP6K1    | inositol hexakisphosphate kinase 1                                    | 0.156 |
| 30842813  | SLC38A2  | solute carrier family 38 member 2                                     | 0.156 |
| 171543899 | PLXNA4   | plexin A4                                                             | 0.156 |
| 157820917 | CDC7     | cell division cycle 7                                                 | 0.156 |
| 157822569 | Tubgcp3  | tubulin, gamma complex associated protein 3                           | 0.156 |
| 224593264 | BORCS8   | BLOC-1 related complex subunit 8                                      | 0.156 |
| 821005859 | N/A      | N/A                                                                   | 0.156 |
| 564393951 | MBD1     | methyl-CpG binding domain protein 1                                   | 0.157 |
| 197927166 | AGPAT5   | 1-acylglycerol-3-phosphate O-acyltransferase 5                        | 0.157 |
| 41054820  | CHRD1    | chordin like 1                                                        | 0.157 |
| 157824174 | HIGD2A   | HIG1 hypoxia inducible domain family member 2A                        | 0.157 |
| 829969914 | N/A      | N/A                                                                   | 0.157 |
| 564390490 | N/A      | N/A                                                                   | 0.157 |
| 201027430 | WDR43    | WD repeat domain 43                                                   | 0.158 |
| 300798312 | POLR3B   | RNA polymerase III subunit B                                          | 0.158 |
| 77917548  | DUS3L    | dihydrouridine synthase 3 like                                        | 0.158 |
| 9910378   | CDC42SE2 | CDC42 small effector 2                                                | 0.158 |
| 564381466 | N/A      | N/A                                                                   | 0.158 |
| 74200325  | UBE2G2   | ubiquitin conjugating enzyme E2 G2                                    | 0.158 |
| 300793740 | TANC2    | tetratricopeptide repeat, ankyrin repeat and coiled-coil containing 2 | 0.158 |
| 672051957 | N/A      | N/A                                                                   | 0.158 |
| 197333849 | ATP23    | ATP23 metallopeptidase and ATP synthase assembly factor homolog       | 0.158 |
| 28972858  | VCPIP1   | valosin containing protein interacting protein 1                      | 0.158 |
| 403310660 | LATS1    | large tumor suppressor kinase 1                                       | 0.158 |
| 149038734 | EIF4EBP2 | eukaryotic translation initiation factor 4E binding protein 2         | 0.158 |
| 6978805   | EMD      | emerin                                                                | 0.159 |
| 164663846 | PHPT1    | phosphohistidine phosphatase 1                                        | 0.159 |
| 672043520 | PI4KB    | phosphatidylinositol 4-kinase beta                                    | 0.159 |
| 41053837  | GPX3     | glutathione peroxidase 3                                              | 0.159 |
| 564355148 | AGBL5    | ATP/GTP binding protein like 5                                        | 0.159 |
| 157823988 | BLOC1S5  | biogenesis of lysosomal organelles complex 1 subunit 5                | 0.159 |

|           |            |                                                       |       |
|-----------|------------|-------------------------------------------------------|-------|
| 157817763 | NEK9       | NIMA related kinase 9                                 | 0.159 |
| 564315719 | N/A        | N/A                                                   | 0.159 |
| 564380021 | TTC28      | tetratricopeptide repeat domain 28                    | 0.160 |
| 76559935  | TUT1       | terminal uridylyl transferase 1, U6 snRNA-specific    | 0.160 |
| 19705483  | CLSTN2     | calsyntenin 2                                         | 0.160 |
| 157819421 | CEP97      | centrosomal protein 97                                | 0.160 |
| 157818167 | PDPR       | pyruvate dehydrogenase phosphatase regulatory subunit | 0.160 |
| 404312665 | DKK3       | dickkopf WNT signaling pathway inhibitor 3            | 0.160 |
| 6981442   | PTPN1      | protein tyrosine phosphatase, non-receptor type 1     | 0.160 |
| 300796412 | ATMIN      | ATM interactor                                        | 0.160 |
| 532003341 | N/A        | N/A                                                   | 0.161 |
| 19924085  | FAT3       | FAT atypical cadherin 3                               | 0.161 |
| 58219518  | RND2       | Rho family GTPase 2                                   | 0.161 |
| 926688833 | N/A        | N/A                                                   | 0.161 |
| 170016030 | DDX31      | DEAD-box helicase 31                                  | 0.161 |
| 748983435 | VEZF1      | vascular endothelial zinc finger 1                    | 0.162 |
| 149067653 | N/A        | N/A                                                   | 0.162 |
| 213688411 | LPCAT1     | lysophosphatidylcholine acyltransferase 1             | 0.162 |
| 149755772 | N/A        | N/A                                                   | 0.162 |
| 124487247 | PRICKLE2   | prickle planar cell polarity protein 2                | 0.162 |
| 114145788 | NAA25      | N(alpha)-acetyltransferase 25, NatB auxiliary subunit | 0.162 |
| 672035849 | N/A        | N/A                                                   | 0.163 |
| 672042487 | NBEA       | neurobeachin                                          | 0.163 |
| 564386027 | CHD8       | chromodomain helicase DNA binding protein 8           | 0.163 |
| 221040576 | MPPED1     | metallophosphoesterase domain containing 1            | 0.163 |
| 11559951  | NRBF2      | nuclear receptor binding factor 2                     | 0.163 |
| 56090283  | RCHY1      | ring finger and CHY zinc finger domain containing 1   | 0.163 |
| 281485586 | MAP3K7     | mitogen-activated protein kinase kinase kinase 7      | 0.163 |
| 149033480 | Zfp956     | zinc finger protein 956                               | 0.163 |
| 157817632 | ZNF202     | zinc finger protein 202                               | 0.164 |
| 672072928 | CUX2       | cut like homeobox 2                                   | 0.164 |
| 672067460 | RGD1560464 | similar to hypothetical protein FLJ38426              | 0.164 |
| 60359854  | POLDIP3    | DNA polymerase delta interacting protein 3            | 0.164 |
| 70794797  | USP3       | ubiquitin specific peptidase 3                        | 0.164 |

|           |                 |                                                                   |       |
|-----------|-----------------|-------------------------------------------------------------------|-------|
| 300798499 | AFF3            | AF4/FMR2 family member 3                                          | 0.164 |
| 157822501 | MCM3AP          | minichromosome maintenance complex component 3 associated protein | 0.164 |
| 296491570 | N/A             | N/A                                                               | 0.164 |
| 197927315 | CCDC94          | coiled-coil domain containing 94                                  | 0.164 |
| 112984440 | TNFRSF19        | TNF receptor superfamily member 19                                | 0.164 |
| 149042848 | LOC100911177    | uncharacterized LOC100911177                                      | 0.165 |
| 564340867 | MMADHC          | methylmalonic aciduria and homocystinuria, cbID type              | 0.165 |
| 76559929  | NOC2L           | NOC2 like nucleolar associated transcriptional repressor          | 0.165 |
| 164663909 | SDE2            | SDE2 telomere maintenance homolog                                 | 0.165 |
| 672042133 | SPATA5          | spermatogenesis associated 5                                      | 0.165 |
| 198278423 | IQCJ-SCHIP1     | IQCJ-SCHIP1 readthrough                                           | 0.166 |
| 300797915 | Rbm33           | RNA binding motif protein 33                                      | 0.166 |
| 403225023 | BRAP            | BRCA1 associated protein                                          | 0.166 |
| 115647917 | Zfp874a/Zfp874b | zinc finger protein 874b                                          | 0.166 |
| 148674168 | DYNLRB1         | dynein light chain roadblock-type 1                               | 0.166 |
| 408772026 | Afg311          | AFG3-like AAA ATPase 1                                            | 0.166 |
| 8393104   | CHKB            | choline kinase beta                                               | 0.166 |
| 158854035 | RNF146          | ring finger protein 146                                           | 0.166 |
| 635065321 | N/A             | N/A                                                               | 0.166 |
| 149030824 | N/A             | N/A                                                               | 0.167 |
| 157822433 | EID1            | EP300 interacting inhibitor of differentiation 1                  | 0.167 |
| 672031565 | N/A             | N/A                                                               | 0.167 |
| 148670274 | KIAA0368        | KIAA0368                                                          | 0.167 |
| 46485387  | NAPRT           | nicotinate phosphoribosyltransferase                              | 0.167 |
| 197385832 | RD3L            | retinal degeneration 3-like                                       | 0.167 |
| 392333169 | CCDC88A         | coiled-coil domain containing 88A                                 | 0.168 |
| 672028565 | Setdb2          | SET domain, bifurcated 2                                          | 0.168 |
| 56605826  | LAMTOR3         | late endosomal/lysosomal adaptor, MAPK and MTOR activator 3       | 0.168 |
| 281371454 | ZNF613          | zinc finger protein 613                                           | 0.168 |
| 55926133  | RFC2            | replication factor C subunit 2                                    | 0.168 |
| 532090801 | N/A             | N/A                                                               | 0.169 |
| 795537196 | N/A             | N/A                                                               | 0.169 |
| 40018600  | CNPPD1          | cyclin Pas1/PHO80 domain containing 1                             | 0.169 |
| 422398900 | CREBZF          | CREB/ATF bZIP transcription factor                                | 0.169 |
| 62087532  | SRSF6           | serine and arginine rich splicing factor 6                        | 0.169 |
| 37360236  | SMG5            | SMG5, nonsense mediated mRNA decay factor                         | 0.169 |

|           |          |                                                                 |       |
|-----------|----------|-----------------------------------------------------------------|-------|
| 6981572   | SP4      | Sp4 transcription factor                                        | 0.169 |
| 640823357 | N/A      | N/A                                                             | 0.169 |
| 57528294  | NEPRO    | nucleolus and neural progenitor protein                         | 0.169 |
| 149061271 | N/A      | N/A                                                             | 0.170 |
| 47059500  | NSG1     | neuronal vesicle trafficking associated 1                       | 0.170 |
| 50511063  | EEPD1    | endonuclease/exonuclease/phosphatase family domain containing 1 | 0.170 |
| 293359997 | SGPP1    | sphingosine-1-phosphate phosphatase 1                           | 0.170 |
| 564392297 | SLC39A12 | solute carrier family 39 member 12                              | 0.170 |
| 13929130  | SLC12A2  | solute carrier family 12 member 2                               | 0.170 |
| 157818643 | KCTD3    | potassium channel tetramerization domain containing 3           | 0.170 |
| 149067744 | Znf48    | zinc finger protein 48                                          | 0.170 |
| 148707518 | RNF2     | ring finger protein 2                                           | 0.171 |
| 189027131 | TEDC2    | tubulin epsilon and delta complex 2                             | 0.171 |
| 16758536  | AATF     | apoptosis antagonizing transcription factor                     | 0.171 |
| 157823165 | DNAJB1   | DnaJ heat shock protein family (Hsp40) member B1                | 0.171 |
| 149044496 | PLAA     | phospholipase A2 activating protein                             | 0.171 |
| 674077614 | N/A      | N/A                                                             | 0.171 |
| 157823942 | COMMD2   | COMM domain containing 2                                        | 0.172 |
| 40807349  | DSTYK    | dual serine/threonine and tyrosine protein kinase               | 0.172 |
| 21489987  | PCYOX1   | prenylcysteine oxidase 1                                        | 0.172 |
| 149044495 | CAAP1    | caspase activity and apoptosis inhibitor 1                      | 0.172 |
| 332245592 | N/A      | N/A                                                             | 0.172 |
| 33356154  | UBE2H    | ubiquitin conjugating enzyme E2 H                               | 0.172 |
| 157822067 | BAP1     | BRCA1 associated protein 1                                      | 0.172 |
| 564375676 | N/A      | N/A                                                             | 0.173 |
| 451172068 | ST6GAL2  | ST6 beta-galactoside alpha-2,6-sialyltransferase 2              | 0.173 |
| 56605790  | HCFC2    | host cell factor C2                                             | 0.173 |
| 300794761 | Fat4     | FAT atypical cadherin 4                                         | 0.173 |
| 47155561  | DNAJC7   | DnaJ heat shock protein family (Hsp40) member C7                | 0.173 |
| 157786908 | ZBED5    | zinc finger BED-type containing 5                               | 0.173 |
| 568972665 | TSPOAP1  | TSPO associated protein 1                                       | 0.173 |
| 148806879 | DNTTIP1  | deoxynucleotidyltransferase terminal interacting protein 1      | 0.174 |
| 300798476 | THAP12   | THAP domain containing 12                                       | 0.174 |

|           |           |                                                      |       |
|-----------|-----------|------------------------------------------------------|-------|
| 672040432 | Mrpl43    | mitochondrial ribosomal protein L43                  | 0.174 |
| 157823565 | COQ10A    | coenzyme Q10A                                        | 0.174 |
| 392355126 | HAUS2     | HAUS augmin like complex subunit 2                   | 0.175 |
| 831218355 | N/A       | N/A                                                  | 0.175 |
| 60360266  | PPP2R2A   | protein phosphatase 2 regulatory subunit Balpha      | 0.175 |
| 148672575 | N/A       | N/A                                                  | 0.175 |
| 545804423 | N/A       | N/A                                                  | 0.175 |
| 672035601 | CEBPG     | CCAAT/enhancer binding protein gamma                 | 0.175 |
| 564382144 | LIN9      | lin-9 DREAM MuvB core complex component              | 0.176 |
| 564303143 | KMT2C     | lysine methyltransferase 2C                          | 0.176 |
| 344253328 | N/A       | N/A                                                  | 0.176 |
| 197304795 | SLC7A6OS  | solute carrier family 7 member 6 opposite strand     | 0.176 |
| 189491869 | KCMF1     | potassium channel modulatory factor 1                | 0.176 |
| 119569672 | BUB3      | BUB3, mitotic checkpoint protein                     | 0.176 |
| 209915609 | PRICKLE1  | prickle planar cell polarity protein 1               | 0.177 |
| 157821479 | METTL25   | methyltransferase like 25                            | 0.177 |
| 56090552  | GTF2F1    | general transcription factor IIF subunit 1           | 0.177 |
| 37360004  | KDM1A     | lysine demethylase 1A                                | 0.177 |
| 164565387 | TBC1D14   | TBC1 domain family member 14                         | 0.177 |
| 21955259  | OLFM3     | olfactomedin 3                                       | 0.177 |
| 564298823 | EML3      | echinoderm microtubule associated protein like 3     | 0.177 |
| 537151309 | N/A       | N/A                                                  | 0.178 |
| 157818889 | NCBP3     | nuclear cap binding subunit 3                        | 0.178 |
| 149067325 | TDG       | thymine DNA glycosylase                              | 0.178 |
| 148677171 | N/A       | N/A                                                  | 0.178 |
| 149048628 | MYNN      | myoneurin                                            | 0.179 |
| 149054120 | ORMDL3    | ORMDL sphingolipid biosynthesis regulator 3          | 0.179 |
| 149044006 | TEDC1     | tubulin epsilon and delta complex 1                  | 0.179 |
| 28972780  | TLE3      | transducin like enhancer of split 3                  | 0.180 |
| 564323153 | ARMCX5    | armadillo repeat containing, X-linked 5              | 0.180 |
| 77695933  | NELL2     | neural EGFL like 2                                   | 0.180 |
| 392333209 | DLG5      | discs large MAGUK scaffold protein 5                 | 0.180 |
| 164565360 | CTTNBP2NL | CTTNBP2 N-terminal like                              | 0.180 |
| 61556927  | EIF3G     | eukaryotic translation initiation factor 3 subunit G | 0.180 |
| 56090317  | MFAP3     | microfibril associated protein 3                     | 0.180 |
| 38454226  | TPD52L2   | tumor protein D52 like 2                             | 0.180 |

|           |           |                                                                     |       |
|-----------|-----------|---------------------------------------------------------------------|-------|
| 62079005  | SLAIN1    | SLAIN motif family member 1                                         | 0.180 |
| 6981296   | NUP50     | nucleoporin 50                                                      | 0.181 |
| 9506755   | GRIK2     | glutamate ionotropic receptor kainate type subunit 2                | 0.181 |
| 405113028 | TAF3      | TATA-box binding protein associated factor 3                        | 0.181 |
| 6981518   | SDC1      | syndecan 1                                                          | 0.182 |
| 672084956 | N/A       | N/A                                                                 | 0.182 |
| 256818812 | RNF165    | ring finger protein 165                                             | 0.182 |
| 157822303 | GPR107    | G protein-coupled receptor 107                                      | 0.182 |
| 157817773 | ZNF641    | zinc finger protein 641                                             | 0.183 |
| 157823413 | THOC3     | THO complex 3                                                       | 0.183 |
| 28076889  | YIPF4     | Yip1 domain family member 4                                         | 0.183 |
| 300797562 | BCOR      | BCL6 corepressor                                                    | 0.183 |
| 401709959 | Ppp1cc    | protein phosphatase 1, catalytic subunit, gamma isoform             | 0.183 |
| 392342217 | RANBP3    | RAN binding protein 3                                               | 0.184 |
| 21914829  | PDCD4     | programmed cell death 4                                             | 0.184 |
| 697350955 | N/A       | N/A                                                                 | 0.184 |
| 9507007   | PTGFRN    | prostaglandin F2 receptor inhibitor                                 | 0.184 |
| 564353949 | N/A       | N/A                                                                 | 0.184 |
| 162287391 | RPL6      | ribosomal protein L6                                                | 0.185 |
| 11139303  | JTB       | jumping translocation breakpoint                                    | 0.185 |
| 568972475 | NCOR1     | nuclear receptor corepressor 1                                      | 0.185 |
| 762006019 | FAM8A1    | family with sequence similarity 8 member A1                         | 0.185 |
| 148747146 | PPP2R2D   | protein phosphatase 2 regulatory subunit Bdelta                     | 0.185 |
| 58865626  | UBXN4     | UBX domain protein 4                                                | 0.186 |
| 119628283 | MACO1     | macoilin 1                                                          | 0.186 |
| 157818115 | PATL1     | PAT1 homolog 1, processing body mRNA decay factor                   | 0.187 |
| 568983220 | PAPD7     | poly(A) RNA polymerase D7, non-canonical                            | 0.187 |
| 60360108  | BRD2      | bromodomain containing 2                                            | 0.187 |
| 958720315 | N/A       | N/A                                                                 | 0.187 |
| 270483843 | ARHGAP11A | Rho GTPase activating protein 11A                                   | 0.187 |
| 564384443 | EIF4ENIF1 | eukaryotic translation initiation factor 4E nuclear import factor 1 | 0.187 |
| 795203979 | N/A       | N/A                                                                 | 0.187 |
| 157817558 | JAKMIP2   | janus kinase and microtubule interacting protein 2                  | 0.187 |
| 148693758 | N/A       | N/A                                                                 | 0.188 |
| 167555101 | STRADB    | STE20-related kinase adaptor beta                                   | 0.188 |

|           |          |                                                      |       |
|-----------|----------|------------------------------------------------------|-------|
| 395824794 | N/A      | N/A                                                  | 0.188 |
| 58652154  | TRIM26   | tripartite motif containing 26                       | 0.188 |
| 148670058 | PRMT6    | protein arginine methyltransferase 6                 | 0.188 |
| 66730335  | SUMO3    | small ubiquitin-like modifier 3                      | 0.188 |
| 8393959   | PIM1     | Pim-1 proto-oncogene, serine/threonine kinase        | 0.188 |
| 56971807  | PARL     | presenilin associated rhomboid like                  | 0.189 |
| 564333605 | BTAFL1   | B-TFIID TATA-box binding protein associated factor 1 | 0.189 |
| 157823683 | HDDC2    | HD domain containing 2                               | 0.189 |
| 149064951 | DYNC1H1  | dynein cytoplasmic 1 intermediate chain 1            | 0.189 |
| 281604121 | C11orf58 | chromosome 11 open reading frame 58                  | 0.189 |
| 537273922 | N/A      | N/A                                                  | 0.189 |
| 48040531  | RNF114   | ring finger protein 114                              | 0.189 |
| 403310688 | USP24    | ubiquitin specific peptidase 24                      | 0.189 |
| 50511227  | ZBTB34   | zinc finger and BTB domain containing 34             | 0.190 |
| 724804431 | N/A      | N/A                                                  | 0.190 |
| 157819605 | EPC2     | enhancer of polycomb homolog 2                       | 0.190 |
| 149047323 | ZNF518B  | zinc finger protein 518B                             | 0.190 |
| 300796253 | ALDH1L2  | aldehyde dehydrogenase 1 family member L2            | 0.190 |
| 157823447 | MFHAS1   | malignant fibrous histiocytoma amplified sequence 1  | 0.191 |
| 149015884 | ZNF407   | zinc finger protein 407                              | 0.191 |
| 19705519  | AAGAB    | alpha and gamma adaptin binding protein              | 0.191 |
| 148703547 | CNOT7    | CCR4-NOT transcription complex subunit 7             | 0.191 |
| 672085227 | USP10    | ubiquitin specific peptidase 10                      | 0.191 |
| 148683335 | SLC25A44 | solute carrier family 25 member 44                   | 0.191 |
| 157822221 | NSUN2    | NOP2/Sun RNA methyltransferase family member 2       | 0.191 |
| 67078422  | TMX1     | thioredoxin related transmembrane protein 1          | 0.191 |
| 586975096 | N/A      | N/A                                                  | 0.192 |
| 72004267  | AKIRIN1  | akirin 1                                             | 0.192 |
| 29789319  | CBLB     | Cbl proto-oncogene B                                 | 0.192 |
| 672067124 | N/A      | N/A                                                  | 0.192 |
| 300795677 | IL12RB2  | interleukin 12 receptor subunit beta 2               | 0.192 |
| 149063727 | P2RX2    | purinergic receptor P2X 2                            | 0.192 |
| 197313795 | MTX1     | metaxin 1                                            | 0.192 |
| 564393080 | WDR33    | WD repeat domain 33                                  | 0.193 |
| 62079229  | PDSS2    | decaprenyl diphosphate synthase subunit 2            | 0.193 |
| 6978635   | CD59     | CD59 molecule (CD59 blood group)                     | 0.193 |
| 149047360 | N/A      | N/A                                                  | 0.193 |

|           |           |                                                           |       |
|-----------|-----------|-----------------------------------------------------------|-------|
| 403310664 | KMT2E     | lysine methyltransferase 2E                               | 0.194 |
| 392332910 | TP53BP2   | tumor protein p53 binding protein 2                       | 0.194 |
| 140971918 | Hnrnpab   | heterogeneous nuclear ribonucleoprotein A/B               | 0.194 |
| 157823197 | NDUFB7    | NADH:ubiquinone oxidoreductase subunit B7                 | 0.194 |
| 348041394 | PSMD5     | proteasome 26S subunit, non-ATPase 5                      | 0.194 |
| 913513476 | N/A       | N/A                                                       | 0.195 |
| 564350633 | SLC35A1   | solute carrier family 35 member A1                        | 0.195 |
| 281427139 | TADA2B    | transcriptional adaptor 2B                                | 0.195 |
| 672078533 | N/A       | N/A                                                       | 0.195 |
| 755470479 | N/A       | N/A                                                       | 0.195 |
| 62078579  | NUB1      | negative regulator of ubiquitin like proteins 1           | 0.195 |
| 157818041 | YEATS2    | YEATS domain containing 2                                 | 0.195 |
| 157822191 | MTMR2     | myotubularin related protein 2                            | 0.195 |
| 296489017 | BEND5     | BEN domain containing 5                                   | 0.196 |
| 149067040 | LIN7A     | lin-7 homolog A, crumbs cell polarity complex component   | 0.196 |
| 157823639 | PPP1R13B  | protein phosphatase 1 regulatory subunit 13B              | 0.196 |
| 9507235   | UGT8      | UDP glycosyltransferase 8                                 | 0.196 |
| 17105340  | GMPR      | guanosine monophosphate reductase                         | 0.197 |
| 148674377 | OSER1     | oxidative stress responsive serine rich 1                 | 0.197 |
| 987939967 | N/A       | N/A                                                       | 0.197 |
| 157821953 | NXPE3     | neurexophilin and PC-esterase domain family member 3      | 0.197 |
| 157820969 | SBNO2     | strawberry notch homolog 2                                | 0.197 |
| 157820401 | ABHD2     | abhydrolase domain containing 2                           | 0.197 |
| 327358533 | N/A       | N/A                                                       | 0.197 |
| 60360230  | EZH2      | enhancer of zeste 2 polycomb repressive complex 2 subunit | 0.197 |
| 157820491 | SESN1     | sestrin 1                                                 | 0.197 |
| 148674304 | RPRD1B    | regulation of nuclear pre-mRNA domain containing 1B       | 0.198 |
| 157821589 | THAP6     | THAP domain containing 6                                  | 0.198 |
| 171846592 | GPBP1     | GC-rich promoter binding protein 1                        | 0.198 |
| 537238017 | N/A       | N/A                                                       | 0.198 |
| 795445199 | N/A       | N/A                                                       | 0.199 |
| 947230375 | N/A       | N/A                                                       | 0.199 |
| 347800639 | GFER      | growth factor, augmenter of liver regeneration            | 0.199 |
| 148704607 | TIMM9     | translocase of inner mitochondrial membrane 9             | 0.199 |
| 57164107  | NIPSNAP3A | nipsnap homolog 3A                                        | 0.199 |
| 157817801 | ADCK1     | aarF domain containing kinase 1                           | 0.199 |



|           |          |                                                                            |       |
|-----------|----------|----------------------------------------------------------------------------|-------|
| 448824835 | Mff      | mitochondrial fission factor                                               | 0.199 |
| 68163459  | JOSD1    | Josephin domain containing 1                                               | 0.199 |
| 568965596 | GTF3C6   | general transcription factor IIC subunit 6                                 | 0.199 |
| 15375324  | ABCD2    | ATP binding cassette subfamily D member 2                                  | 0.199 |
| 725566074 | N/A      | N/A                                                                        | 0.199 |
| 213511844 | ALG2     | ALG2, alpha-1,3/1,6-mannosyltransferase                                    | 0.200 |
| 672048604 | PHTF2    | putative homeodomain transcription factor 2                                | 0.200 |
| 672075467 | MTF2     | metal response element binding transcription factor 2                      | 0.200 |
| 28174943  | RPL24    | ribosomal protein L24                                                      | 0.200 |
| 26350839  | AP3S2    | adaptor related protein complex 3 sigma 2 subunit                          | 0.200 |
| 81295375  | SLC35B2  | solute carrier family 35 member B2                                         | 0.200 |
| 58865352  | NUBP2    | nucleotide binding protein 2                                               | 0.200 |
| 829785807 | N/A      | N/A                                                                        | 0.201 |
| 157821415 | GZF1     | GDNF inducible zinc finger protein 1                                       | 0.201 |
| 672086679 | N/A      | N/A                                                                        | 0.201 |
| 635090844 | N/A      | N/A                                                                        | 0.201 |
| 148667150 | ZNF22    | zinc finger protein 22                                                     | 0.202 |
| 157821579 | BICD1    | BICD cargo adaptor 1                                                       | 0.202 |
| 77797839  | UBXN1    | UBX domain protein 1                                                       | 0.202 |
| 472375531 | N/A      | N/A                                                                        | 0.202 |
| 84781688  | GAS8     | growth arrest specific 8                                                   | 0.202 |
| 149069422 | RPL7L1   | ribosomal protein L7 like 1                                                | 0.202 |
| 190360731 | TMEM167B | transmembrane protein 167B                                                 | 0.203 |
| 208973268 | URB2     | URB2 ribosome biogenesis 2 homolog (S. cerevisiae)                         | 0.203 |
| 14277700  | RPS12    | ribosomal protein S12                                                      | 0.203 |
| 16758392  | MGAT2    | mannosyl (alpha-1,6)-glycoprotein beta-1,2-N-acetylglucosaminyltransferase | 0.203 |
| 281604227 | CEP104   | centrosomal protein 104                                                    | 0.203 |
| 149057558 | ABHD13   | abhydrolase domain containing 13                                           | 0.203 |
| 56090371  | FAM210A  | family with sequence similarity 210 member A                               | 0.203 |
| 148674145 | CHMP4B   | charged multivesicular body protein 4B                                     | 0.203 |
| 219277692 | NDUFB2   | NADH:ubiquinone oxidoreductase subunit B2                                  | 0.203 |
| 4506681   | RPS11    | ribosomal protein S11                                                      | 0.203 |
| 672031398 | ANKRD11  | ankyrin repeat domain 11                                                   | 0.203 |
| 157818001 | GFOD2    | glucose-fructose oxidoreductase domain containing 2                        | 0.203 |
| 755548745 | N/A      | N/A                                                                        | 0.204 |

|           |               |                                                  |       |
|-----------|---------------|--------------------------------------------------|-------|
| 157823465 | CHSY1         | chondroitin sulfate synthase 1                   | 0.204 |
| 432091578 | N/A           | N/A                                              | 0.204 |
| 157817288 | C18orf25      | chromosome 18 open reading frame 25              | 0.204 |
| 61557021  | BFAR          | bifunctional apoptosis regulator                 | 0.204 |
| 823419445 | N/A           | N/A                                              | 0.204 |
| 564384353 | SH3BP2        | SH3 domain binding protein 2                     | 0.204 |
| 145558904 | EML1          | echinoderm microtubule associated protein like 1 | 0.205 |
| 148702333 | DDX42         | DEAD-box helicase 42                             | 0.205 |
| 672062795 | N/A           | N/A                                              | 0.205 |
| 187469679 | LDB1          | LIM domain binding 1                             | 0.205 |
| 926702009 | N/A           | N/A                                              | 0.205 |
| 672046840 | UBOX5         | U-box domain containing 5                        | 0.206 |
| 564383487 | SLAIN2        | SLAIN motif family member 2                      | 0.206 |
| 564370654 | ZNF263        | zinc finger protein 263                          | 0.206 |
| 293341722 | N/A           | N/A                                              | 0.206 |
| 149025942 | Gar1          | GAR1 ribonucleoprotein                           | 0.206 |
| 300794743 | TSC22D2       | TSC22 domain family member 2                     | 0.206 |
| 568977804 | ATAD2B        | ATPase family, AAA domain containing 2B          | 0.206 |
| 258614012 | PSMB8         | proteasome subunit beta 8                        | 0.206 |
| 157817674 | ATP5MF-PTCD1  | ATP5MF-PTCD1 readthrough                         | 0.207 |
| 672024181 | OBSL1         | obscurin like 1                                  | 0.207 |
| 564305043 | RBM12B        | RNA binding motif protein 12B                    | 0.207 |
| 564377460 | N/A           | N/A                                              | 0.207 |
| 40018540  | DDX24         | DEAD-box helicase 24                             | 0.208 |
| 513021588 | N/A           | N/A                                              | 0.208 |
| 157822231 | ZCCHC11       | zinc finger CCHC-type containing 11              | 0.209 |
| 157822387 | KLHL28        | kelch like family member 28                      | 0.209 |
| 27229022  | 2610002M06Rik | RIKEN cDNA 2610002M06 gene                       | 0.209 |
| 971393650 | MOB1B         | MOB kinase activator 1B                          | 0.209 |
| 672044177 | N/A           | N/A                                              | 0.210 |
| 157786600 | RNF145        | ring finger protein 145                          | 0.210 |
| 149042879 | N/A           | N/A                                              | 0.210 |
| 926686523 | N/A           | N/A                                              | 0.210 |
| 61557082  | TERF2IP       | TERF2 interacting protein                        | 0.211 |
| 61556748  | TSPYL1        | TSPY like 1                                      | 0.211 |
| 674076364 | N/A           | N/A                                              | 0.211 |
| 574584811 | TUBB4A        | tubulin beta 4A class IVa                        | 0.211 |
| 210147441 | ATXN7L3B      | ataxin 7 like 3B                                 | 0.211 |

|           |               |                                                        |       |
|-----------|---------------|--------------------------------------------------------|-------|
| 149030718 | PIP5K1A       | phosphatidylinositol-4-phosphate 5-kinase type 1 alpha | 0.211 |
| 37359818  | KCTD5         | potassium channel tetramerization domain containing 5  | 0.212 |
| 310616720 | DHX37         | DEAH-box helicase 37                                   | 0.212 |
| 157823667 | UTP15         | UTP15, small subunit processome component              | 0.212 |
| 109470195 | TNKS1BP1      | tankyrase 1 binding protein 1                          | 0.213 |
| 57526818  | TMEM204       | transmembrane protein 204                              | 0.213 |
| 207318    | TMSB10/TMSB4X | thymosin beta 4, X-linked                              | 0.213 |
| 392337823 | RSF1          | remodeling and spacing factor 1                        | 0.214 |
| 545215595 | N/A           | N/A                                                    | 0.214 |
| 564320608 | SEMA6A        | semaphorin 6A                                          | 0.214 |
| 13928842  | ZNF148        | zinc finger protein 148                                | 0.214 |
| 58865776  | TRIM32        | tripartite motif containing 32                         | 0.214 |
| 58865624  | NUF2          | NUF2, NDC80 kinetochore complex component              | 0.214 |
| 392340953 | ITSN2         | intersectin 2                                          | 0.214 |
| 157822663 | RAB22A        | RAB22A, member RAS oncogene family                     | 0.214 |
| 672034794 | N/A           | N/A                                                    | 0.215 |
| 67078512  | SNX15         | sorting nexin 15                                       | 0.215 |
| 84781638  | KLHL25        | kelch like family member 25                            | 0.215 |
| 511905488 | N/A           | N/A                                                    | 0.215 |
| 157819363 | ZNF282        | zinc finger protein 282                                | 0.215 |
| 859770113 | N/A           | N/A                                                    | 0.216 |
| 639869    | CHKA          | choline kinase alpha                                   | 0.216 |
| 157818439 | NHLRC2        | NHL repeat containing 2                                | 0.216 |
| 189163477 | SCAF4         | SR-related CTD associated factor 4                     | 0.216 |
| 124249254 | ZNF639        | zinc finger protein 639                                | 0.217 |
| 396080328 | ADCYAP1R1     | ADCYAP receptor type I                                 | 0.217 |
| 66911118  | NFX1          | nuclear transcription factor, X-box binding 1          | 0.217 |
| 24025618  | DAB1          | DAB1, reelin adaptor protein                           | 0.217 |
| 564334521 | CACUL1        | CDK2 associated cullin domain 1                        | 0.218 |
| 537216032 | N/A           | N/A                                                    | 0.218 |
| 998662027 | N/A           | N/A                                                    | 0.218 |
| 209954626 | TAF2          | TATA-box binding protein associated factor 2           | 0.218 |
| 564370219 | LPIN2         | lipin 2                                                | 0.218 |
| 213688373 | GADD45GIP1    | GADD45G interacting protein 1                          | 0.218 |
| 56090383  | TMEM43        | transmembrane protein 43                               | 0.218 |
| 300796732 | ZNF445        | zinc finger protein 445                                | 0.219 |
| 8393855   | NUP54         | nucleoporin 54                                         | 0.219 |

|           |          |                                                       |       |
|-----------|----------|-------------------------------------------------------|-------|
| 148696021 | N/A      | N/A                                                   | 0.219 |
| 765099233 | LMNB2    | lamin B2                                              | 0.219 |
| 157817121 | TCTE1    | t-complex-associated-testis-expressed 1               | 0.219 |
| 281604112 | BAZ1A    | bromodomain adjacent to zinc finger domain 1A         | 0.219 |
| 149045074 | NUP153   | nucleoporin 153                                       | 0.219 |
| 13027450  | SEN2     | SUMO1/sentrin/SMT3 specific peptidase 2               | 0.220 |
| 293343541 | ICE1     | interactor of little elongation complex ELL subunit 1 | 0.220 |
| 24638440  | RIMS4    | regulating synaptic membrane exocytosis 4             | 0.220 |
| 751361196 | N/A      | N/A                                                   | 0.220 |
| 512957927 | N/A      | N/A                                                   | 0.221 |
| 171916115 | LRRC55   | leucine rich repeat containing 55                     | 0.221 |
| 157820985 | NCK1     | NCK adaptor protein 1                                 | 0.221 |
| 2804296   | CDH8     | cadherin 8                                            | 0.221 |
| 6678315   | TSC22D1  | TSC22 domain family member 1                          | 0.221 |
| 42627869  | VKORC1L1 | vitamin K epoxide reductase complex subunit 1 like 1  | 0.221 |
| 149030883 | GSS      | glutathione synthetase                                | 0.222 |
| 71051128  | ANKRD10  | ankyrin repeat domain 10                              | 0.222 |
| 564355517 | CMPK2    | cytidine/uridine monophosphate kinase 2               | 0.222 |
| 288541353 | CMTM4    | CKLF like MARVEL transmembrane domain containing 4    | 0.222 |
| 74145693  | N/A      | N/A                                                   | 0.222 |
| 724892384 | N/A      | N/A                                                   | 0.222 |
| 148669751 | SMNDC1   | survival motor neuron domain containing 1             | 0.223 |
| 564340181 | SETX     | senataxin                                             | 0.223 |
| 293340917 | C3orf70  | chromosome 3 open reading frame 70                    | 0.223 |
| 568992461 | DIP2B    | disco interacting protein 2 homolog B                 | 0.223 |
| 568992461 | DIP2B    | disco interacting protein 2 homolog B                 | 0.223 |
| 21902533  | ZNF394   | zinc finger protein 394                               | 0.223 |
| 149064227 | DMXL1    | Dmx like 1                                            | 0.223 |
| 125988381 | JMJD6    | arginine demethylase and lysine hydroxylase           | 0.223 |
| 77917554  | SLC39A9  | solute carrier family 39 member 9                     | 0.223 |
| 197252056 | MED1     | mediator complex subunit 1                            | 0.223 |
| 117940043 | MED22    | mediator complex subunit 22                           | 0.225 |
| 672026667 | CUX1     | cut like homeobox 1                                   | 0.225 |
| 51871603  | ST7      | suppression of tumorigenicity 7                       | 0.225 |
| 405113035 | E2F4     | E2F transcription factor 4                            | 0.225 |
| 677444634 | N/A      | N/A                                                   | 0.225 |

|           |         |                                                                   |       |
|-----------|---------|-------------------------------------------------------------------|-------|
| 189181698 | ZNF131  | zinc finger protein 131                                           | 0.225 |
| 149033481 | ZNF212  | zinc finger protein 212                                           | 0.225 |
| 958729596 | N/A     | N/A                                                               | 0.226 |
| 149065426 | CASP2   | caspase 2                                                         | 0.226 |
| 539937    | ARL14   | ADP ribosylation factor like GTPase 14                            | 0.227 |
| 148696931 | ARRDC2  | arrestin domain containing 2                                      | 0.227 |
| 564303058 | DIDO1   | death inducer-obliterator 1                                       | 0.227 |
| 157818775 | AFF1    | AF4/FMR2 family member 1                                          | 0.228 |
| 157823503 | PLPBP   | pyridoxal phosphate binding protein                               | 0.228 |
| 300793975 | ZNF286A | zinc finger protein 286A                                          | 0.228 |
| 6978787   | DYRK1A  | dual specificity tyrosine phosphorylation regulated kinase 1A     | 0.228 |
| 70794793  | MAP2K7  | mitogen-activated protein kinase kinase 7                         | 0.228 |
| 19173786  | SYF2    | SYF2 pre-mRNA splicing factor                                     | 0.229 |
| 149043402 | N/A     | N/A                                                               | 0.230 |
| 270483881 | CBFA2T2 | CBFA2/RUNX1 translocation partner 2                               | 0.231 |
| 223555981 | UBE2QL1 | ubiquitin conjugating enzyme E2 Q family like 1                   | 0.231 |
| 6978483   | ALAD    | aminolevulinate dehydratase                                       | 0.231 |
| 58865962  | RNF41   | ring finger protein 41                                            | 0.231 |
| 625182285 | N/A     | N/A                                                               | 0.231 |
| 84781676  | MTRR    | 5-methyltetrahydrofolate-homocysteine methyltransferase reductase | 0.231 |
| 48976087  | TFB1M   | transcription factor B1, mitochondrial                            | 0.231 |
| 672047736 | N/A     | N/A                                                               | 0.232 |
| 672039306 | RCOR2   | REST corepressor 2                                                | 0.232 |
| 148670791 | ZFYVE1  | zinc finger FYVE-type containing 1                                | 0.232 |
| 76096324  | ORC6    | origin recognition complex subunit 6                              | 0.233 |
| 672073089 | CCDC62  | coiled-coil domain containing 62                                  | 0.233 |
| 731286412 | N/A     | N/A                                                               | 0.233 |
| 798974764 | SRRD    | SRR1 domain containing                                            | 0.233 |
| 300796674 | TRANK1  | tetratricopeptide repeat and ankyrin repeat containing 1          | 0.233 |
| 11560052  | DUSP12  | dual specificity phosphatase 12                                   | 0.234 |
| 67975423  | N/A     | N/A                                                               | 0.234 |
| 187937036 | ZC3HC1  | zinc finger C3HC-type containing 1                                | 0.234 |
| 149032040 | SLC11A2 | solute carrier family 11 member 2                                 | 0.234 |
| 802996718 | N/A     | N/A                                                               | 0.234 |
| 404351667 | BOD1    | biorientation of chromosomes in cell division 1                   | 0.234 |
| 62664711  | FAM69C  | family with sequence similarity 69 member C                       | 0.235 |

|           |             |                                                           |       |
|-----------|-------------|-----------------------------------------------------------|-------|
| 77736608  | XYLT2       | xylosyltransferase 2                                      | 0.235 |
| 149037637 | N/A         | N/A                                                       | 0.235 |
| 56676358  | IPPK        | inositol-pentakisphosphate 2-kinase                       | 0.235 |
| 70794766  | MRPS25      | mitochondrial ribosomal protein S25                       | 0.235 |
| 524957969 | N/A         | N/A                                                       | 0.235 |
| 148692466 | N/A         | N/A                                                       | 0.236 |
| 564340133 | GTF3C4      | general transcription factor IIIC subunit 4               | 0.236 |
| 565303947 | N/A         | N/A                                                       | 0.236 |
| 847038810 | N/A         | N/A                                                       | 0.236 |
| 149067780 | MVP         | major vault protein                                       | 0.236 |
| 149062169 | MEN1        | menin 1                                                   | 0.236 |
| 359718966 | TOM1L1      | target of myb1 like 1 membrane trafficking protein        | 0.236 |
| 12847552  | H3F3A/H3F3B | H3 histone family member 3A                               | 0.236 |
| 37360264  | TRMT6       | tRNA methyltransferase 6                                  | 0.236 |
| 67078478  | NAF1        | nuclear assembly factor 1 ribonucleoprotein               | 0.237 |
| 121583782 | ZNF426      | zinc finger protein 426                                   | 0.237 |
| 40018556  | NOB1        | NIN1/PSMD8 binding protein 1 homolog                      | 0.237 |
| 564359486 | TBC1D30     | TBC1 domain family member 30                              | 0.237 |
| 162951835 | CYTH1       | cytohesin 1                                               | 0.237 |
| 19173746  | STK17B      | serine/threonine kinase 17b                               | 0.237 |
| 76096328  | COMM9       | COMM domain containing 9                                  | 0.238 |
| 114145762 | WDR83       | WD repeat domain 83                                       | 0.238 |
| 13929082  | PDXK        | pyridoxal kinase                                          | 0.239 |
| 13928816  | EIF2AK3     | eukaryotic translation initiation factor 2 alpha kinase 3 | 0.239 |
| 158636018 | LRRC6       | leucine rich repeat containing 6                          | 0.240 |
| 74195118  | PPAT        | phosphoribosyl pyrophosphate amidotransferase             | 0.240 |
| 672023059 | TLN2        | talin 2                                                   | 0.240 |
| 672023059 | TLN2        | talin 2                                                   | 0.240 |
| 157819927 | SNRPB2      | small nuclear ribonucleoprotein polypeptide B2            | 0.241 |
| 821013078 | N/A         | N/A                                                       | 0.241 |
| 149023044 | TMEM87A     | transmembrane protein 87A                                 | 0.241 |
| 300794867 | RSBN1       | round spermatid basic protein 1                           | 0.241 |
| 388596656 | SLC4A1AP    | solute carrier family 4 member 1 adaptor protein          | 0.242 |
| 62078913  | OAF         | out at first homolog                                      | 0.242 |
| 537151504 | N/A         | N/A                                                       | 0.242 |
| 149039916 | N/A         | N/A                                                       | 0.242 |

|           |                     |                                                          |       |
|-----------|---------------------|----------------------------------------------------------|-------|
| 148704679 | N/A                 | N/A                                                      | 0.242 |
| 6981302   | ODC1                | ornithine decarboxylase 1                                | 0.242 |
| 148706231 | N/A                 | N/A                                                      | 0.243 |
| 56090303  | NUFIP1              | NUFIP1, FMR1 interacting protein 1                       | 0.243 |
| 157821267 | RFC5                | replication factor C subunit 5                           | 0.243 |
| 19424174  | DNPH1               | 2'-deoxynucleoside 5'-phosphate N-hydrolase 1            | 0.243 |
| 157819279 | TNPO3               | transportin 3                                            | 0.243 |
| 58865780  | ZBTB17              | zinc finger and BTB domain containing 17                 | 0.243 |
| 148678808 | N/A                 | N/A                                                      | 0.244 |
| 281371443 | CASTOR2             | cytosolic arginine sensor for mTORC1 subunit 2           | 0.245 |
| 57527612  | SLC17A5             | solute carrier family 17 member 5                        | 0.245 |
| 71043628  | OGFRL1              | opioid growth factor receptor like 1                     | 0.245 |
| 830036530 | N/A                 | N/A                                                      | 0.245 |
| 149049946 | MED4                | mediator complex subunit 4                               | 0.245 |
| 355557615 | N/A                 | N/A                                                      | 0.246 |
| 31415868  | MAFB                | MAF bZIP transcription factor B                          | 0.246 |
| 157819373 | FDX1L               | ferredoxin 1 like                                        | 0.247 |
| 154426327 | KANSL2              | KAT8 regulatory NSL complex subunit 2                    | 0.247 |
| 392333339 | FAM124A             | family with sequence similarity 124 member A             | 0.247 |
| 4885579   | CNOT9               | CCR4-NOT transcription complex subunit 9                 | 0.248 |
| 157820771 | ZNRF2               | zinc and ring finger 2                                   | 0.248 |
| 300797934 | Ranbp2              | RAN binding protein 2                                    | 0.249 |
| 158631258 | KDSR                | 3-ketodihydrosphingosine reductase                       | 0.249 |
| 189491614 | SLC25A46            | solute carrier family 25 member 46                       | 0.249 |
| 157821413 | USP30               | ubiquitin specific peptidase 30                          | 0.250 |
| 672055562 | LBH                 | limb bud and heart development                           | 0.250 |
| 58865438  | TRIP13              | thyroid hormone receptor interactor 13                   | 0.250 |
| 157819833 | ZNF287              | zinc finger protein 287                                  | 0.250 |
| 954521187 | N/A                 | N/A                                                      | 0.250 |
| 8923415   | MARCH5              | membrane associated ring-CH-type finger 5                | 0.250 |
| 564354018 | DFFA                | DNA fragmentation factor subunit alpha                   | 0.251 |
| 157823223 | ZNF330              | zinc finger protein 330                                  | 0.251 |
| 392340053 | FRMD4B              | FERM domain containing 4B                                | 0.251 |
| 667261609 | N/A                 | N/A                                                      | 0.251 |
| 209529662 | LOC100911166/Rpusd2 | RNA pseudouridylate synthase domain containing 2         | 0.252 |
| 291042683 | DCAF5               | DDB1 and CUL4 associated factor 5                        | 0.252 |
| 256818763 | PLEKHH1             | pleckstrin homology, MyTH4 and FERM domain containing H1 | 0.252 |

|           |          |                                                                      |       |
|-----------|----------|----------------------------------------------------------------------|-------|
| 157823719 | TRAIIP   | TRAF interacting protein                                             | 0.252 |
| 166157540 | TMEM222  | transmembrane protein 222                                            | 0.253 |
| 672036088 | KMT2B    | lysine methyltransferase 2B                                          | 0.253 |
| 158187529 | LMX1A    | LIM homeobox transcription factor 1 alpha                            | 0.253 |
| 672052951 | Zfp618   | zinc finger protein 618                                              | 0.254 |
| 157819449 | ZBTB11   | zinc finger and BTB domain containing 11                             | 0.254 |
| 157817961 | PHF3     | PHD finger protein 3                                                 | 0.254 |
| 209954792 | PDCD2    | programmed cell death 2                                              | 0.254 |
| 149060523 | GPR156   | G protein-coupled receptor 156                                       | 0.254 |
| 40254779  | EFNB1    | ephrin B1                                                            | 0.255 |
| 149031125 | APMAP    | adipocyte plasma membrane associated protein                         | 0.256 |
| 157821435 | RANBP17  | RAN binding protein 17                                               | 0.256 |
| 149063273 | MPHOSPH9 | M-phase phosphoprotein 9                                             | 0.256 |
| 148666908 | ADAMTS9  | ADAM metallopeptidase with thrombospondin type 1 motif 9             | 0.256 |
| 149058240 | N/A      | N/A                                                                  | 0.256 |
| 57164019  | B4GALT3  | beta-1,4-galactosyltransferase 3                                     | 0.256 |
| 827475660 | EPC1     | enhancer of polycomb homolog 1                                       | 0.256 |
| 548456234 | N/A      | N/A                                                                  | 0.256 |
| 71361655  | MRPL12   | mitochondrial ribosomal protein L12                                  | 0.257 |
| 77627757  | IQUB     | IQ motif and ubiquitin domain containing                             | 0.257 |
| 157821283 | C19orf47 | chromosome 19 open reading frame 47                                  | 0.257 |
| 9506805   | IL18     | interleukin 18                                                       | 0.257 |
| 564328896 | CHD2     | chromodomain helicase DNA binding protein 2                          | 0.258 |
| 119388826 | TFPT     | TCF3 fusion partner                                                  | 0.258 |
| 564308639 | N/A      | N/A                                                                  | 0.258 |
| 564367958 | SEMA4C   | semaphorin 4C                                                        | 0.258 |
| 57528225  | UTP4     | UTP4, small subunit processome component                             | 0.258 |
| 13928966  | HSF2     | heat shock transcription factor 2                                    | 0.259 |
| 672028116 | TAPT1    | transmembrane anterior posterior transformation 1                    | 0.259 |
| 148709965 | CUTC     | cutC copper transporter                                              | 0.259 |
| 564390712 | NOL8     | nucleolar protein 8                                                  | 0.259 |
| 84781678  | NET1     | neuroepithelial cell transforming 1                                  | 0.260 |
| 2252816   | AXIN1    | axin 1                                                               | 0.260 |
| 584052040 | N/A      | N/A                                                                  | 0.260 |
| 585155919 | N/A      | N/A                                                                  | 0.260 |
| 149066961 | TBC1D15  | TBC1 domain family member 15                                         | 0.260 |
| 74180575  | PPM1D    | protein phosphatase, Mg <sup>2+</sup> /Mn <sup>2+</sup> dependent 1D | 0.260 |



|           |          |                                                      |       |
|-----------|----------|------------------------------------------------------|-------|
| 795170747 | N/A      | N/A                                                  | 0.261 |
| 395627633 | PCP4     | Purkinje cell protein 4                              | 0.261 |
| 784639986 | NIT1     | nitrilase 1                                          | 0.262 |
| 157817588 | TBK1     | TANK binding kinase 1                                | 0.262 |
| 281427178 | CEP76    | centrosomal protein 76                               | 0.262 |
| 425384    | CAMK4    | calcium/calmodulin dependent protein kinase IV       | 0.262 |
| 6978615   | CCKAR    | cholecystokinin A receptor                           | 0.263 |
| 148691080 | MKX      | mohawk homeobox                                      | 0.263 |
| 67078454  | SLC25A51 | solute carrier family 25 member 51                   | 0.263 |
| 149043921 | N/A      | N/A                                                  | 0.263 |
| 958722695 | N/A      | N/A                                                  | 0.263 |
| 197382256 | PHF12    | PHD finger protein 12                                | 0.263 |
| 380877082 | NAXE     | NAD(P)HX epimerase                                   | 0.263 |
| 148687213 | COX19    | COX19, cytochrome c oxidase assembly factor          | 0.264 |
| 675706491 | N/A      | N/A                                                  | 0.264 |
| 40254721  | AMIGO2   | adhesion molecule with Ig like domain 2              | 0.264 |
| 564353880 | DDI2     | DNA damage inducible 1 homolog 2                     | 0.264 |
| 724928464 | N/A      | N/A                                                  | 0.265 |
| 537141832 | N/A      | N/A                                                  | 0.266 |
| 392350322 | DNAJC13  | DnaJ heat shock protein family (Hsp40) member C13    | 0.266 |
| 8393652   | KCNJ2    | potassium voltage-gated channel subfamily J member 2 | 0.267 |
| 157820043 | ZKSCAN5  | zinc finger with KRAB and SCAN domains 5             | 0.267 |
| 197381522 | ZNF879   | zinc finger protein 879                              | 0.267 |
| 157819581 | SESN2    | sestrin 2                                            | 0.267 |
| 31543579  | RELN     | reelin                                               | 0.268 |
| 244792650 | TNIK     | TRAF2 and NCK interacting kinase                     | 0.268 |
| 62543511  | RAB30    | RAB30, member RAS oncogene family                    | 0.269 |
| 56090325  | TMEM206  | transmembrane protein 206                            | 0.269 |
| 6693638   | MORC3    | MORC family CW-type zinc finger 3                    | 0.269 |
| 148696370 | PANK2    | pantothenate kinase 2                                | 0.270 |
| 404312698 | CASC4    | cancer susceptibility 4                              | 0.270 |
| 149056387 | N/A      | N/A                                                  | 0.270 |
| 37360132  | RHOBTB3  | Rho related BTB domain containing 3                  | 0.270 |
| 157819717 | NIPA2    | non imprinted in Prader-Willi/Angelman syndrome 2    | 0.270 |
| 564309292 | N/A      | N/A                                                  | 0.271 |
| 149022827 | PAX6     | paired box 6                                         | 0.271 |

|           |          |                                                          |       |
|-----------|----------|----------------------------------------------------------|-------|
| 157823369 | TERF2    | telomeric repeat binding factor 2                        | 0.272 |
| 564368081 | REV1     | REV1, DNA directed polymerase                            | 0.272 |
| 564316286 | CNST     | consortin, connexin sorting protein                      | 0.272 |
| 56090463  | GORASP2  | golgi reassembly stacking protein 2                      | 0.273 |
| 635108195 | N/A      | N/A                                                      | 0.273 |
| 568941588 | IQSEC1   | IQ motif and Sec7 domain 1                               | 0.273 |
| 117606399 | RGS16    | regulator of G protein signaling 16                      | 0.273 |
| 672030146 | N/A      | N/A                                                      | 0.274 |
| 961745338 | N/A      | N/A                                                      | 0.274 |
| 537211362 | N/A      | N/A                                                      | 0.274 |
| 568923507 | VAV3     | vav guanine nucleotide exchange factor 3                 | 0.274 |
| 205830446 | C11orf98 | chromosome 11 open reading frame 98                      | 0.275 |
| 157819811 | C21orf91 | chromosome 21 open reading frame 91                      | 0.275 |
| 281371427 | NRIP1    | nuclear receptor interacting protein 1                   | 0.275 |
| 157787107 | CCNG2    | cyclin G2                                                | 0.276 |
| 157823125 | MRPS30   | mitochondrial ribosomal protein S30                      | 0.276 |
| 564394925 | PAPD5    | poly(A) RNA polymerase D5, non-canonical                 | 0.276 |
| 564365504 | CCDC51   | coiled-coil domain containing 51                         | 0.277 |
| 157822475 | NGDN     | neuroguidin                                              | 0.277 |
| 18376839  | DDIT4    | DNA damage inducible transcript 4                        | 0.277 |
| 109464919 | ARHGEF26 | Rho guanine nucleotide exchange factor 26                | 0.278 |
| 194474032 | RNF19A   | ring finger protein 19A, RBR E3 ubiquitin protein ligase | 0.278 |
| 37360160  | ATP11B   | ATPase phospholipid transporting 11B (putative)          | 0.278 |
| 37360160  | ATP11B   | ATPase phospholipid transporting 11B (putative)          | 0.278 |
| 402794103 | ATG101   | autophagy related 101                                    | 0.279 |
| 148670774 | N/A      | N/A                                                      | 0.280 |
| 59937915  | ARIH2    | ariadne RBR E3 ubiquitin protein ligase 2                | 0.280 |
| 197386048 | PTRHD1   | peptidyl-tRNA hydrolase domain containing 1              | 0.280 |
| 392349899 | ACAD8    | acyl-CoA dehydrogenase family member 8                   | 0.281 |
| 149053140 | PHF23    | PHD finger protein 23                                    | 0.281 |
| 166091450 | RPS6KB2  | ribosomal protein S6 kinase B2                           | 0.281 |
| 537134105 | N/A      | N/A                                                      | 0.281 |
| 68341997  | GPR160   | G protein-coupled receptor 160                           | 0.281 |
| 315259095 | UBN1     | ubinuclein 1                                             | 0.281 |
| 672023887 | N/A      | N/A                                                      | 0.283 |
| 32451765  | FBXO10   | F-box protein 10                                         | 0.283 |
| 157821325 | TWINK    | twinkle mtDNA helicase                                   | 0.283 |

|           |            |                                                          |       |
|-----------|------------|----------------------------------------------------------|-------|
| 157821915 | MSANTD3    | Myb/SANT DNA binding domain containing 3                 | 0.283 |
| 300797224 | GRAMD1C    | GRAM domain containing 1C                                | 0.284 |
| 148679437 | HAS3       | hyaluronan synthase 3                                    | 0.284 |
| 564307173 | HEATR5A    | HEAT repeat containing 5A                                | 0.284 |
| 672029178 | CCSER2     | coiled-coil serine rich protein 2                        | 0.285 |
| 672029178 | CCSER2     | coiled-coil serine rich protein 2                        | 0.285 |
| 29612542  | H2AFZ      | H2A histone family member Z                              | 0.285 |
| 149052738 | RGD1561277 | RGD1561277                                               | 0.285 |
| 281599335 | BMS1       | BMS1, ribosome biogenesis factor                         | 0.286 |
| 157819221 | NAA30      | N(alpha)-acetyltransferase 30, NatC catalytic subunit    | 0.286 |
| 68342017  | TC2N       | tandem C2 domains, nuclear                               | 0.286 |
| 585866350 | PEMT       | phosphatidylethanolamine N-methyltransferase             | 0.286 |
| 148701441 | N/A        | N/A                                                      | 0.287 |
| 62078733  | MAK16      | MAK16 homolog                                            | 0.287 |
| 672020915 | VCPKMT     | valosin containing protein lysine methyltransferase      | 0.288 |
| 157817660 | EBF3       | early B cell factor 3                                    | 0.288 |
| 148687364 | Cux1       | cut-like homeobox 1                                      | 0.288 |
| 143359181 | PQLC1      | PQ loop repeat containing 1                              | 0.288 |
| 392334341 | USP38      | ubiquitin specific peptidase 38                          | 0.289 |
| 56090644  | ABHD6      | abhydrolase domain containing 6                          | 0.289 |
| 403310686 | SOX4       | SRY-box 4                                                | 0.289 |
| 51948506  | AK8        | adenylate kinase 8                                       | 0.290 |
| 672053062 | FKBP15     | FK506 binding protein 15                                 | 0.290 |
| 347921954 | Pirb       | paired Ig-like receptor B                                | 0.290 |
| 213512553 | CCDC43     | coiled-coil domain containing 43                         | 0.290 |
| 206734    | RPL5       | ribosomal protein L5                                     | 0.290 |
| 635121365 | N/A        | N/A                                                      | 0.290 |
| 672054320 | N/A        | N/A                                                      | 0.291 |
| 149043544 | ABCG1      | ATP binding cassette subfamily G member 1                | 0.291 |
| 157822011 | TGS1       | trimethylguanosine synthase 1                            | 0.291 |
| 62088698  | SPSB1      | splA/ryanodine receptor domain and SOCS box containing 1 | 0.291 |
| 281427149 | FAM69A     | family with sequence similarity 69 member A              | 0.292 |
| 586597897 | DBP        | D-box binding PAR bZIP transcription factor              | 0.292 |
| 76559919  | N4BP3      | NEDD4 binding protein 3                                  | 0.292 |
| 344249173 | N/A        | N/A                                                      | 0.292 |
| 149066670 | RXYLT1     | ribitol xylosyltransferase 1                             | 0.292 |
| 204744    | IGFBP3     | insulin like growth factor binding protein 3             | 0.292 |

|           |          |                                                             |       |
|-----------|----------|-------------------------------------------------------------|-------|
| 166795897 | PIMREG   | PICALM interacting mitotic regulator                        | 0.293 |
| 564363988 | ISLR2    | immunoglobulin superfamily containing leucine rich repeat 2 | 0.293 |
| 149064973 | ASNS     | asparagine synthetase (glutamine-hydrolyzing)               | 0.293 |
| 13592025  | PGGT1B   | protein geranylgeranyltransferase type I subunit beta       | 0.293 |
| 149024496 | SPEN     | spen family transcriptional repressor                       | 0.293 |
| 149066830 | Styx12   | serine/threonine/tyrosine interacting protein-like2         | 0.294 |
| 672017116 | N/A      | N/A                                                         | 0.294 |
| 148677466 | N/A      | N/A                                                         | 0.294 |
| 201066401 | RCOR3    | REST corepressor 3                                          | 0.294 |
| 149031601 | Hist1h1c | histone cluster 1 H1 family member c                        | 0.294 |
| 34328151  | TBR1     | T-box, brain 1                                              | 0.295 |
| 157821125 | COA7     | cytochrome c oxidase assembly factor 7 (putative)           | 0.295 |
| 149026477 | N/A      | N/A                                                         | 0.295 |
| 359324332 | N/A      | N/A                                                         | 0.295 |
| 56789732  | VSTM5    | V-set and transmembrane domain containing 5                 | 0.295 |
| 537148165 | N/A      | N/A                                                         | 0.296 |
| 145553978 | SFMBT1   | Scm like with four mbt domains 1                            | 0.297 |
| 157818273 | CDC42EP4 | CDC42 effector protein 4                                    | 0.297 |
| 8394196   | NTM      | neurotrimin                                                 | 0.297 |
| 68163385  | GPATCH4  | G-patch domain containing 4                                 | 0.297 |
| 157817213 | C16orf91 | chromosome 16 open reading frame 91                         | 0.297 |
| 157821997 | MED28    | mediator complex subunit 28                                 | 0.297 |
| 918611848 | N/A      | N/A                                                         | 0.299 |
| 74220037  | FAM107B  | family with sequence similarity 107 member B                | 0.299 |
| 58866018  | BIN2     | bridging integrator 2                                       | 0.299 |
| 157822519 | CBLN4    | cerebellin 4 precursor                                      | 0.299 |
| 564327642 | CEP89    | centrosomal protein 89                                      | 0.300 |
| 61097926  | RYK      | receptor-like tyrosine kinase                               | 0.300 |
| 13929168  | FAT1     | FAT atypical cadherin 1                                     | 0.300 |
| 62078947  | MOSPD1   | motile sperm domain containing 1                            | 0.301 |
| 148683687 | RHBDL3   | rhomboid like 3                                             | 0.301 |
| 157822367 | PUS3     | pseudouridylate synthase 3                                  | 0.301 |
| 60223061  | TERF1    | telomeric repeat binding factor 1                           | 0.301 |
| 982920935 | DLX6     | distal-less homeobox 6                                      | 0.301 |
| 51948532  | TBC1D20  | TBC1 domain family member 20                                | 0.302 |
| 157819365 | TBC1D25  | TBC1 domain family member 25                                | 0.302 |

|           |         |                                                      |       |
|-----------|---------|------------------------------------------------------|-------|
| 7339838   | SUV39H1 | suppressor of variegation 3-9 homolog 1              | 0.302 |
| 528768520 | N/A     | N/A                                                  | 0.302 |
| 537238000 | N/A     | N/A                                                  | 0.302 |
| 300798394 | NPHP3   | nephrocystin 3                                       | 0.303 |
| 13928740  | RGN     | regucalcin                                           | 0.303 |
| 73621376  | PDZK1   | PDZ domain containing 1                              | 0.303 |
| 61557316  | ST3GAL1 | ST3 beta-galactoside alpha-2,3-sialyltransferase 1   | 0.303 |
| 293349725 | AMER3   | APC membrane recruitment protein 3                   | 0.303 |
| 56605644  | TFB2M   | transcription factor B2, mitochondrial               | 0.303 |
| 187937148 | CXorf38 | chromosome X open reading frame 38                   | 0.303 |
| 13324708  | ZBTB10  | zinc finger and BTB domain containing 10             | 0.303 |
| 672084304 | N/A     | N/A                                                  | 0.303 |
| 300795716 | CCDC77  | coiled-coil domain containing 77                     | 0.303 |
| 285002227 | SH3BP1  | SH3 domain binding protein 1                         | 0.304 |
| 625246380 | N/A     | N/A                                                  | 0.304 |
| 28212232  | GNL3    | G protein nucleolar 3                                | 0.305 |
| 29789082  | COIL    | coilin                                               | 0.305 |
| 148678764 | MED21   | mediator complex subunit 21                          | 0.305 |
| 148702008 | N/A     | N/A                                                  | 0.305 |
| 300796434 | FOXRED2 | FAD dependent oxidoreductase domain containing 2     | 0.305 |
| 13592081  | SCTR    | secretin receptor                                    | 0.306 |
| 56605628  | SFT2D1  | SFT2 domain containing 1                             | 0.306 |
| 157818733 | ZBTB2   | zinc finger and BTB domain containing 2              | 0.306 |
| 157819315 | OSBPL11 | oxysterol binding protein like 11                    | 0.306 |
| 672042113 | N/A     | N/A                                                  | 0.307 |
| 157822893 | IMP3    | IMP3, U3 small nucleolar ribonucleoprotein           | 0.307 |
| 672017641 | N/A     | N/A                                                  | 0.308 |
| 62078701  | DIEXF   | digestive organ expansion factor homolog (zebrafish) | 0.308 |
| 6680532   | KCNJ3   | potassium voltage-gated channel subfamily J member 3 | 0.308 |
| 300797262 | BRPF1   | bromodomain and PHD finger containing 1              | 0.308 |
| 6978497   | AMBP    | alpha-1-microglobulin/bikunin precursor              | 0.308 |
| 300798436 | NME6    | NME/NM23 nucleoside diphosphate kinase 6             | 0.308 |
| 51491900  | TOR1A   | torsin family 1 member A                             | 0.308 |
| 537250304 | N/A     | N/A                                                  | 0.308 |
| 672059756 | N/A     | N/A                                                  | 0.309 |
| 56605776  | TAF11   | TATA-box binding protein associated factor 11        | 0.309 |

|           |               |                                                                     |       |
|-----------|---------------|---------------------------------------------------------------------|-------|
| 349501022 | 2410002F23Rik | RIKEN cDNA 2410002F23 gene                                          | 0.309 |
| 72255513  | AGA           | aspartylglucosaminidase                                             | 0.309 |
| 50510821  | AMIGO1        | adhesion molecule with Ig like domain 1                             | 0.310 |
| 755532277 | Lrrfip2       | leucine rich repeat (in FLII) interacting protein 2                 | 0.311 |
| 300798014 | ICE2          | interactor of little elongation complex ELL subunit 2               | 0.311 |
| 672043577 | Rprd2         | regulation of nuclear pre-mRNA domain containing 2                  | 0.312 |
| 109480728 | TMEM74        | transmembrane protein 74                                            | 0.313 |
| 109480728 | TMEM74        | transmembrane protein 74                                            | 0.313 |
| 157819887 | LACTB         | lactamase beta                                                      | 0.314 |
| 149048116 | KHDC4         | KH domain containing 4, pre-mRNA splicing factor                    | 0.314 |
| 293351303 | METTL22       | methyltransferase like 22                                           | 0.315 |
| 148707009 | HMGCS2        | 3-hydroxy-3-methylglutaryl-CoA synthase 2                           | 0.315 |
| 62078923  | DZIP1L        | DAZ interacting zinc finger protein 1 like                          | 0.315 |
| 157816943 | MCM8          | minichromosome maintenance 8 homologous recombination repair factor | 0.316 |
| 33086606  | SRPRB         | SRP receptor beta subunit                                           | 0.318 |
| 148676796 | N/A           | N/A                                                                 | 0.319 |
| 408821459 | STYX          | serine/threonine/tyrosine interacting protein                       | 0.319 |
| 672017463 | N/A           | N/A                                                                 | 0.320 |
| 884934330 | N/A           | N/A                                                                 | 0.321 |
| 300793780 | ZNF251        | zinc finger protein 251                                             | 0.321 |
| 149036607 | N/A           | N/A                                                                 | 0.321 |
| 724851156 | N/A           | N/A                                                                 | 0.321 |
| 34882672  | ETAA1         | ETAA1, ATR kinase activator                                         | 0.322 |
| 149051028 | RNF144A       | ring finger protein 144A                                            | 0.322 |
| 17865345  | CDH23         | cadherin related 23                                                 | 0.322 |
| 68534262  | C1orf43       | chromosome 1 open reading frame 43                                  | 0.322 |
| 41386747  | ZC3H18        | zinc finger CCCH-type containing 18                                 | 0.322 |
| 672030183 | HIST1H2AH     | histone cluster 1 H2A family member h                               | 0.323 |
| 913496630 | N/A           | N/A                                                                 | 0.324 |
| 880805457 | GPR161        | G protein-coupled receptor 161                                      | 0.324 |
| 148681991 | MIOS          | meiosis regulator for oocyte development                            | 0.325 |
| 564397086 | BRPF3         | bromodomain and PHD finger containing 3                             | 0.326 |
| 672026763 | ATXN2         | ataxin 2                                                            | 0.326 |
| 157820341 | GPR63         | G protein-coupled receptor 63                                       | 0.326 |
| 76362828  | TEF           | TEF, PAR bZIP transcription factor                                  | 0.327 |

|           |          |                                                                            |       |
|-----------|----------|----------------------------------------------------------------------------|-------|
| 50510655  | PCF11    | PCF11 cleavage and polyadenylation factor subunit                          | 0.327 |
| 47155567  | ARHGAP20 | Rho GTPase activating protein 20                                           | 0.328 |
| 148710252 | SLITRK4  | SLIT and NTRK like family member 4                                         | 0.328 |
| 157820119 | LRRTM1   | leucine rich repeat transmembrane neuronal 1                               | 0.328 |
| 68163537  | NXPE4    | neurexophilin and PC-esterase domain family member 4                       | 0.329 |
| 564318054 | R3hcc1   | R3H domain and coiled-coil containing 1                                    | 0.329 |
| 404501489 | DDX55    | DEAD-box helicase 55                                                       | 0.329 |
| 157823980 | CCNT1    | cyclin T1                                                                  | 0.330 |
| 109479851 | NRDE2    | NRDE-2, necessary for RNA interference, domain containing                  | 0.330 |
| 157817260 | ORAOV1   | oral cancer overexpressed 1                                                | 0.330 |
| 564298767 | N/A      | N/A                                                                        | 0.331 |
| 62244083  | PDRG1    | p53 and DNA damage regulated 1                                             | 0.331 |
| 672063138 | IP6K2    | inositol hexakisphosphate kinase 2                                         | 0.332 |
| 582015198 | CRY2     | cryptochrome circadian regulator 2                                         | 0.332 |
| 946774489 | N/A      | N/A                                                                        | 0.332 |
| 149032986 | MFSD4B   | major facilitator superfamily domain containing 4B                         | 0.332 |
| 564309026 | SUN2     | Sad1 and UNC84 domain containing 2                                         | 0.332 |
| 564333920 | PPRC1    | peroxisome proliferator-activated receptor gamma, coactivator-related 1    | 0.333 |
| 149064983 | N/A      | N/A                                                                        | 0.333 |
| 157824124 | NUAK1    | NUAK family kinase 1                                                       | 0.335 |
| 349732232 | NFATC1   | nuclear factor of activated T cells 1                                      | 0.335 |
| 564303955 | EMX1     | empty spiracles homeobox 1                                                 | 0.335 |
| 156627555 | NT5C3B   | 5'-nucleotidase, cytosolic IIIB                                            | 0.335 |
| 6680007   | GJC1     | gap junction protein gamma 1                                               | 0.336 |
| 157820863 | RPIA     | ribose 5-phosphate isomerase A                                             | 0.336 |
| 158186659 | CBS/CBSL | cystathionine-beta-synthase                                                | 0.339 |
| 564307081 | ATXN7L1  | ataxin 7 like 1                                                            | 0.339 |
| 3212116   | PFDN2    | prefoldin subunit 2                                                        | 0.340 |
| 564350836 | MELK     | maternal embryonic leucine zipper kinase                                   | 0.341 |
| 157824026 | TCEANC   | transcription elongation factor A N-terminal and central domain containing | 0.341 |
| 672055128 | SAMD11   | sterile alpha motif domain containing 11                                   | 0.342 |
| 300794780 | GPSM2    | G protein signaling modulator 2                                            | 0.342 |
| 157819851 | ZNF565   | zinc finger protein 565                                                    | 0.342 |
| 157818881 | Zfp954   | zinc finger protein 954                                                    | 0.342 |

|           |          |                                                          |       |
|-----------|----------|----------------------------------------------------------|-------|
| 30017415  | ITPKC    | inositol-trisphosphate 3-kinase C                        | 0.343 |
| 61557263  | GDAP2    | ganglioside induced differentiation associated protein 2 | 0.344 |
| 77917610  | GPBP1L1  | GC-rich promoter binding protein 1 like 1                | 0.344 |
| 199561799 | LRP12    | LDL receptor related protein 12                          | 0.344 |
| 392337836 | RNF169   | ring finger protein 169                                  | 0.345 |
| 73990974  | LZTS3    | leucine zipper tumor suppressor family member 3          | 0.345 |
| 160333172 | COG2     | component of oligomeric golgi complex 2                  | 0.346 |
| 157787079 | NVL      | nuclear VCP-like                                         | 0.347 |
| 291167790 | Fam13a   | family with sequence similarity 13, member A             | 0.347 |
| 164518930 | SDK1     | sidekick cell adhesion molecule 1                        | 0.347 |
| 157786710 | CEP112   | centrosomal protein 112                                  | 0.347 |
| 564365330 | CDC25A   | cell division cycle 25A                                  | 0.348 |
| 625263218 | N/A      | N/A                                                      | 0.348 |
| 672037086 | N/A      | N/A                                                      | 0.348 |
| 157824010 | MRPS31   | mitochondrial ribosomal protein S31                      | 0.348 |
| 66730433  | RBM48    | RNA binding motif protein 48                             | 0.349 |
| 157786956 | IL27RA   | interleukin 27 receptor subunit alpha                    | 0.350 |
| 672053077 | N/A      | N/A                                                      | 0.351 |
| 672067227 | ZNF354A  | zinc finger protein 354A                                 | 0.351 |
| 564368492 | CARF     | calcium responsive transcription factor                  | 0.351 |
| 149067193 | Cfap54   | cilia and flagella associated protein 54                 | 0.351 |
| 141803183 | ZKSCAN3  | zinc finger with KRAB and SCAN domains 3                 | 0.351 |
| 109460021 | KIAA2026 | KIAA2026                                                 | 0.352 |
| 157821859 | RNF219   | ring finger protein 219                                  | 0.352 |
| 927108944 | N/A      | N/A                                                      | 0.353 |
| 58865826  | ZNF35    | zinc finger protein 35                                   | 0.353 |
| 157822711 | RBM28    | RNA binding motif protein 28                             | 0.353 |
| 56119156  | Zfp58    | zinc finger protein 58                                   | 0.353 |
| 440909886 | N/A      | N/A                                                      | 0.354 |
| 157818251 | FBXO4    | F-box protein 4                                          | 0.354 |
| 76096340  | ANKRD16  | ankyrin repeat domain 16                                 | 0.354 |
| 281604129 | HELQ     | helicase, POLQ like                                      | 0.354 |
| 392306987 | N/A      | N/A                                                      | 0.355 |
| 532034304 | N/A      | N/A                                                      | 0.355 |
| 40018598  | ANGPTL4  | angiopoietin like 4                                      | 0.356 |
| 672065395 | CCNYL1   | cyclin Y like 1                                          | 0.356 |
| 672018101 | N/A      | N/A                                                      | 0.356 |
| 148673748 | FAM110B  | family with sequence similarity 110 member B             | 0.357 |



|           |           |                                                             |       |
|-----------|-----------|-------------------------------------------------------------|-------|
| 672053428 | LRP8      | LDL receptor related protein 8                              | 0.358 |
| 201066365 | PAPSS2    | 3'-phosphoadenosine 5'-phosphosulfate synthase 2            | 0.359 |
| 348041294 | Spata24   | spermatogenesis associated 24                               | 0.359 |
| 564393142 | WDR36     | WD repeat domain 36                                         | 0.359 |
| 157820017 | FBXO33    | F-box protein 33                                            | 0.359 |
| 57528321  | RIOK2     | RIO kinase 2                                                | 0.360 |
| 392342123 | ALS2CL    | ALS2 C-terminal like                                        | 0.360 |
| 74183022  | Zfp773    | zinc finger protein 773                                     | 0.360 |
| 564344754 | PMEPA1    | prostate transmembrane protein, androgen induced 1          | 0.360 |
| 37360398  | ISLR2     | immunoglobulin superfamily containing leucine rich repeat 2 | 0.360 |
| 88853859  | UBE3D     | ubiquitin protein ligase E3D                                | 0.361 |
| 281332148 | RIOK1     | RIO kinase 1                                                | 0.361 |
| 157822721 | NUPL2     | nucleoporin like 2                                          | 0.361 |
| 157822027 | CSRNP2    | cysteine and serine rich nuclear protein 2                  | 0.361 |
| 755542850 | RGS6      | regulator of G protein signaling 6                          | 0.361 |
| 58865996  | TRIM13    | tripartite motif containing 13                              | 0.361 |
| 149056682 | N/A       | N/A                                                         | 0.361 |
| 300794219 | OPN3      | opsin 3                                                     | 0.362 |
| 62543527  | TGIF1     | TGFB induced factor homeobox 1                              | 0.362 |
| 6981048   | HSD17B1   | hydroxysteroid 17-beta dehydrogenase 1                      | 0.363 |
| 319996608 | Spin2c    | spindlin family, member 2C                                  | 0.363 |
| 77627740  | ING3      | inhibitor of growth family member 3                         | 0.363 |
| 62642955  | NIM1K     | NIM1 serine/threonine protein kinase                        | 0.364 |
| 148675659 | CSDE1     | cold shock domain containing E1                             | 0.364 |
| 672069572 | KANSL1    | KAT8 regulatory NSL complex subunit 1                       | 0.364 |
| 300797828 | KAT14     | lysine acetyltransferase 14                                 | 0.365 |
| 406362836 | HS6ST3    | heparan sulfate 6-O-sulfotransferase 3                      | 0.365 |
| 148710078 | TAF5      | TATA-box binding protein associated factor 5                | 0.366 |
| 564395350 | N/A       | N/A                                                         | 0.366 |
| 157817592 | HEXIM2    | hexamethylene bisacetamide inducible 2                      | 0.366 |
| 586989396 | N/A       | N/A                                                         | 0.367 |
| 672055229 | N/A       | N/A                                                         | 0.368 |
| 564311478 | KIAA1211L | KIAA1211 like                                               | 0.369 |
| 209529638 | RSBN1L    | round spermatid basic protein 1 like                        | 0.369 |
| 238859603 | ISLR2     | immunoglobulin superfamily containing leucine rich repeat 2 | 0.369 |
| 926682956 | N/A       | N/A                                                         | 0.369 |

|           |              |                                                  |       |
|-----------|--------------|--------------------------------------------------|-------|
| 149067053 | LRR1Q1       | leucine rich repeats and IQ motif containing 1   | 0.370 |
| 74143776  | INIP         | INTS3 and NABP interacting protein               | 0.371 |
| 350540004 | CENPW        | centromere protein W                             | 0.371 |
| 148704240 | ZMYM2        | zinc finger MYM-type containing 2                | 0.371 |
| 157821875 | PTCD2        | pentatricopeptide repeat domain 2                | 0.372 |
| 157820949 | SAMD5        | sterile alpha motif domain containing 5          | 0.372 |
| 884872268 | N/A          | N/A                                              | 0.372 |
| 672036551 | ZDHHC13      | zinc finger DHHC-type containing 13              | 0.373 |
| 672042720 | N/A          | N/A                                              | 0.373 |
| 157817720 | SLC16A14     | solute carrier family 16 member 14               | 0.374 |
| 149048326 | N/A          | N/A                                              | 0.374 |
| 148671273 | N/A          | N/A                                              | 0.375 |
| 410960574 | N/A          | N/A                                              | 0.376 |
| 62078501  | TTI2         | TELO2 interacting protein 2                      | 0.376 |
| 16758666  | TIMP1        | TIMP metalloproteinase inhibitor 1               | 0.376 |
| 157821747 | MDM2         | MDM2 proto-oncogene                              | 0.377 |
| 158508524 | DDIT3        | DNA damage inducible transcript 3                | 0.377 |
| 213972545 | MXD1         | MAX dimerization protein 1                       | 0.378 |
| 564326636 | Zfp94        | zinc finger protein 94                           | 0.378 |
| 40538878  | NEXN         | nexilin F-actin binding protein                  | 0.379 |
| 157822681 | EFNB2        | ephrin B2                                        | 0.379 |
| 164565364 | ITPKB        | inositol-trisphosphate 3-kinase B                | 0.380 |
| 564338579 | SASS6        | SAS-6 centriolar assembly protein                | 0.381 |
| 564323985 | LOC108348337 | uncharacterized LOC108348337                     | 0.382 |
| 568997192 | PRDM15       | PR/SET domain 15                                 | 0.383 |
| 17105346  | PLSCR1       | phospholipid scramblase 1                        | 0.383 |
| 14388593  | SPATA2       | spermatogenesis associated 2                     | 0.385 |
| 564382837 | LIN54        | lin-54 DREAM MuvB core complex component         | 0.387 |
| 56605820  | PAPD4        | poly(A) RNA polymerase D4, non-canonical         | 0.387 |
| 970744322 | N/A          | N/A                                              | 0.388 |
| 149037585 | N/A          | N/A                                              | 0.389 |
| 564352668 | MYCL         | MYCL proto-oncogene, bHLH transcription factor   | 0.392 |
| 51592090  | CCR5         | C-C motif chemokine receptor 5 (gene/pseudogene) | 0.393 |
| 171846573 | FBXL4        | F-box and leucine rich repeat protein 4          | 0.393 |
| 59709429  | ZSCAN21      | zinc finger and SCAN domain containing 21        | 0.395 |
| 672019438 | FKBP15       | FK506 binding protein 15                         | 0.395 |
| 157823389 | TRMT9B       | tRNA methyltransferase 9B (putative)             | 0.395 |

|           |                   |                                                                  |       |
|-----------|-------------------|------------------------------------------------------------------|-------|
| 404501518 | ZNF569            | zinc finger protein 569                                          | 0.396 |
| 564321498 | ZFP1              | ZFP1 zinc finger protein                                         | 0.396 |
| 148681067 | VASH2             | vasohibin 2                                                      | 0.397 |
| 8392855   | ADCYAP1           | adenylate cyclase activating polypeptide 1                       | 0.397 |
| 40789237  | PCDHA4            | protocadherin alpha 4                                            | 0.398 |
| 149025439 | DICER1            | dicer 1, ribonuclease III                                        | 0.398 |
| 198278467 | DCUN1D2           | defective in cullin neddylation 1 domain containing 2            | 0.398 |
| 157821403 | RASSF7            | Ras association domain family member 7                           | 0.399 |
| 148664478 | N/A               | N/A                                                              | 0.400 |
| 16758238  | SPA17             | sperm autoantigenic protein 17                                   | 0.402 |
| 67078450  | OSGEPL1           | O-sialoglycoprotein endopeptidase like 1                         | 0.402 |
| 11560016  | HTR1B             | 5-hydroxytryptamine receptor 1B                                  | 0.402 |
| 564318492 | FAM208A           | family with sequence similarity 208 member A                     | 0.403 |
| 157817446 | LINGO2            | leucine rich repeat and Ig domain containing 2                   | 0.403 |
| 23097354  | FADD              | Fas associated via death domain                                  | 0.403 |
| 148695049 | FIGN              | fidgetin, microtubule severing factor                            | 0.403 |
| 51948522  | PLA2G15           | phospholipase A2 group XV                                        | 0.404 |
| 282158061 | Ttc41             | tetratricopeptide repeat domain 41                               | 0.404 |
| 62945262  | PIK3IP1           | phosphoinositide-3-kinase interacting protein 1                  | 0.404 |
| 61889068  | MXI1              | MAX interactor 1, dimerization protein                           | 0.405 |
| 157819301 | ZNF777            | zinc finger protein 777                                          | 0.406 |
| 148747270 | PTGS2             | prostaglandin-endoperoxide synthase 2                            | 0.408 |
| 293345066 | PPIL6             | peptidylprolyl isomerase like 6                                  | 0.408 |
| 226371633 | CABLES1           | Cdk5 and Abl enzyme substrate 1                                  | 0.409 |
| 157817845 | KMT5B             | lysine methyltransferase 5B                                      | 0.413 |
| 16758574  | CNTN5             | contactin 5                                                      | 0.414 |
| 66730347  | PTPRCAP           | protein tyrosine phosphatase, receptor type C associated protein | 0.415 |
| 13928944  | P2RY4             | pyrimidinergic receptor P2Y4                                     | 0.415 |
| 564351113 | N/A               | N/A                                                              | 0.415 |
| 67846052  | DCUN1D3           | defective in cullin neddylation 1 domain containing 3            | 0.416 |
| 672036241 | RGD1584023/Zfp939 | similar to zinc finger protein 11B                               | 0.419 |
| 148688049 | N/A               | N/A                                                              | 0.419 |
| 157821351 | EXO1              | exonuclease 1                                                    | 0.420 |
| 14861862  | CRYGD             | crystallin gamma D                                               | 0.421 |
| 293348214 | CCDC88C           | coiled-coil domain containing 88C                                | 0.421 |
| 955485868 | N/A               | N/A                                                              | 0.422 |

|           |                |                                                           |       |
|-----------|----------------|-----------------------------------------------------------|-------|
| 68163435  | MBLAC1         | metallo-beta-lactamase domain containing 1                | 0.423 |
| 564318578 | ANKRD28        | ankyrin repeat domain 28                                  | 0.424 |
| 38454286  | TMEM110-MUSTN1 | TMEM110-MUSTN1 readthrough                                | 0.425 |
| 188595675 | RFX7           | regulatory factor X7                                      | 0.426 |
| 444741673 | CYHR1          | cysteine and histidine rich 1                             | 0.426 |
| 672054464 | Srrm1          | serine/arginine repetitive matrix 1                       | 0.427 |
| 350591922 | N/A            | N/A                                                       | 0.427 |
| 255982592 | RBM20          | RNA binding motif protein 20                              | 0.427 |
| 568997192 | PRDM15         | PR/SET domain 15                                          | 0.429 |
| 56090421  | PXYLP1         | 2-phosphoxylose phosphatase 1                             | 0.429 |
| 564362348 | Fam76b         | family with sequence similarity 76, member B              | 0.429 |
| 564316243 | CEP170         | centrosomal protein 170                                   | 0.430 |
| 157819193 | DOK5           | docking protein 5                                         | 0.430 |
| 56090305  | NFATC2IP       | nuclear factor of activated T cells 2 interacting protein | 0.430 |
| 537166446 | N/A            | N/A                                                       | 0.430 |
| 625275780 | N/A            | N/A                                                       | 0.430 |
| 672087260 | N/A            | N/A                                                       | 0.431 |
| 25742816  | TIMM17A        | translocase of inner mitochondrial membrane 17A           | 0.431 |
| 56090289  | PELO           | pelota mRNA surveillance and ribosome rescue factor       | 0.432 |
| 564303928 | TET3           | tet methylcytosine dioxygenase 3                          | 0.432 |
| 564322442 | Kdm6a          | lysine demethylase 6A                                     | 0.432 |
| 157819993 | CCDC112        | coiled-coil domain containing 112                         | 0.433 |
| 129772    | PENK           | proenkephalin                                             | 0.433 |
| 293348129 | DACT1          | dishevelled binding antagonist of beta catenin 1          | 0.433 |
| 564395313 | OTUD4          | OTU deubiquitinase 4                                      | 0.434 |
| 392345518 | SEN5           | SUMO1/sentrin specific peptidase 5                        | 0.434 |
| 625269293 | N/A            | N/A                                                       | 0.435 |
| 56090592  | EMP2           | epithelial membrane protein 2                             | 0.436 |
| 672031975 | LOC299312      | similar to G protein-binding protein CRFG                 | 0.436 |
| 926720695 | N/A            | N/A                                                       | 0.437 |
| 157823891 | ING2           | inhibitor of growth family member 2                       | 0.439 |
| 74196108  | NECTIN4        | nectin cell adhesion molecule 4                           | 0.442 |
| 62078765  | Zfp819         | zinc finger protein 819                                   | 0.442 |
| 564352534 | Szt2           | SZT2, KICSTOR complex subunit                             | 0.443 |
| 58865998  | PCDHGB7        | protocadherin gamma subfamily B, 7                        | 0.443 |
| 564311452 | TMEM131        | transmembrane protein 131                                 | 0.443 |

|           |                       |                                                                   |       |
|-----------|-----------------------|-------------------------------------------------------------------|-------|
| 821394612 | N/A                   | N/A                                                               | 0.444 |
| 893846521 | MARCH11               | membrane associated ring-CH-type finger 11                        | 0.445 |
| 564335481 | FYB1                  | FYN binding protein 1                                             | 0.446 |
| 884914541 | N/A                   | N/A                                                               | 0.450 |
| 3676248   | Prim1                 | DNA primase subunit 1                                             | 0.450 |
| 157817047 | NEDD1                 | neural precursor cell expressed, developmentally down-regulated 1 | 0.451 |
| 880954369 | N/A                   | N/A                                                               | 0.451 |
| 293341533 | LOC108348225          | feline leukemia virus subgroup C receptor-related protein 1       | 0.451 |
| 51980294  | COQ3                  | coenzyme Q3, methyltransferase                                    | 0.452 |
| 157820727 | RPL27A                | ribosomal protein L27a                                            | 0.452 |
| 672045396 | N/A                   | N/A                                                               | 0.452 |
| 524983306 | N/A                   | N/A                                                               | 0.453 |
| 149066425 | A930017M01Rik         | Smg-5 homolog, nonsense mediated mRNA decay factor pseudogene     | 0.454 |
| 76881802  | KCNG3                 | potassium voltage-gated channel modifier subfamily G member 3     | 0.454 |
| 60360636  | GAREM1                | GRB2 associated regulator of MAPK1 subtype 1                      | 0.454 |
| 755537242 | CLK4                  | CDC like kinase 4                                                 | 0.456 |
| 53850630  | LOC100362724/MGC95208 | similar to 4930453N24Rik protein                                  | 0.456 |
| 149041559 | BUD13                 | BUD13 homolog                                                     | 0.456 |
| 157818699 | TSEN54                | tRNA splicing endonuclease subunit 54                             | 0.458 |
| 845633640 | TSSC4                 | tumor suppressing subtransferable candidate 4                     | 0.458 |
| 67078462  | SOX18                 | SRY-box 18                                                        | 0.460 |
| 126722629 | HSPBAP1               | HSPB1 associated protein 1                                        | 0.460 |
| 8392993   | BMP3                  | bone morphogenetic protein 3                                      | 0.461 |
| 157819737 | SARS2                 | seryl-tRNA synthetase 2, mitochondrial                            | 0.463 |
| 655889411 | N/A                   | N/A                                                               | 0.463 |
| 564317714 | Ktn1                  | kinectin 1                                                        | 0.463 |
| 157822327 | ATG14                 | autophagy related 14                                              | 0.464 |
| 564382848 | Hnrnpdl               | heterogeneous nuclear ribonucleoprotein D-like                    | 0.464 |
| 21955138  | RAB38                 | RAB38, member RAS oncogene family                                 | 0.465 |
| 884945546 | N/A                   | N/A                                                               | 0.465 |
| 8394142   | RAB27A                | RAB27A, member RAS oncogene family                                | 0.466 |
| 255708448 | KATNA1                | katanin catalytic subunit A1                                      | 0.466 |
| 157818819 | TMEM144               | transmembrane protein 144                                         | 0.466 |
| 157817797 | PDCD2L                | programmed cell death 2 like                                      | 0.468 |

|           |           |                                                                       |       |
|-----------|-----------|-----------------------------------------------------------------------|-------|
| 564347830 | ZXDC      | ZXD family zinc finger C                                              | 0.468 |
| 7949105   | PBX3      | PBX homeobox 3                                                        | 0.468 |
| 148706598 | PKDCC     | protein kinase domain containing, cytoplasmic                         | 0.469 |
| 114145706 | LOC499407 | LRRGT00097                                                            | 0.469 |
| 51948492  | NUDT19    | nudix hydrolase 19                                                    | 0.470 |
| 66730445  | LZTFL1    | leucine zipper transcription factor like 1                            | 0.472 |
| 68163485  | WDYHV1    | WDYHV motif containing 1                                              | 0.472 |
| 672061753 | N/A       | N/A                                                                   | 0.474 |
| 117940029 | ZC3H12A   | zinc finger CCCH-type containing 12A                                  | 0.474 |
| 198278471 | ZBED4     | zinc finger BED-type containing 4                                     | 0.476 |
| 213385320 | LRTOMT    | leucine rich transmembrane and O-methyltransferase domain containing  | 0.476 |
| 70608121  | Dmrtc1a   | DMRT-like family C1a                                                  | 0.479 |
| 70912374  | CCNQ      | cyclin Q                                                              | 0.479 |
| 672047066 | CEP152    | centrosomal protein 152                                               | 0.480 |
| 676284727 | N/A       | N/A                                                                   | 0.481 |
| 157821565 | MTHFD2L   | methylenetetrahydrofolate dehydrogenase (NADP+ dependent) 2 like      | 0.482 |
| 17530969  | SLC8A3    | solute carrier family 8 member A3                                     | 0.483 |
| 672055181 | VIT       | vitrin                                                                | 0.484 |
| 803269187 | N/A       | N/A                                                                   | 0.485 |
| 149024753 | DFFB      | DNA fragmentation factor subunit beta                                 | 0.487 |
| 564299234 | Lcor      | ligand dependent nuclear receptor corepressor                         | 0.488 |
| 149053039 | KCNAB3    | potassium voltage-gated channel subfamily A regulatory beta subunit 3 | 0.488 |
| 817337812 | N/A       | N/A                                                                   | 0.488 |
| 564361059 | CYTH4     | cytohesin 4                                                           | 0.489 |
| 281306771 | ADAMTS4   | ADAM metalloproteinase with thrombospondin type 1 motif 4             | 0.489 |
| 148689230 | MAPKAPK3  | mitogen-activated protein kinase-activated protein kinase 3           | 0.490 |
| 56090445  | PHOSPHO2  | phosphatase, orphan 2                                                 | 0.490 |
| 564347830 | ZXDC      | ZXD family zinc finger C                                              | 0.490 |
| 568970985 | MBTD1     | mbt domain containing 1                                               | 0.491 |
| 62078749  | C7orf25   | chromosome 7 open reading frame 25                                    | 0.493 |
| 672061705 | KMT2A     | lysine methyltransferase 2A                                           | 0.498 |
| 11560065  | GPR85     | G protein-coupled receptor 85                                         | 0.502 |
| 76096320  | USHBP1    | USH1 protein network component harmonin binding protein 1             | 0.504 |
| 212549645 | KIF18A    | kinesin family member 18A                                             | 0.505 |

|           |               |                                                                 |       |
|-----------|---------------|-----------------------------------------------------------------|-------|
| 157817521 | Oacyl         | O-acyltransferase like                                          | 0.505 |
| 672084062 | TEPP          | testis, prostate and placenta expressed                         | 0.510 |
| 149017375 | ARAP3         | ArfGAP with RhoGAP domain, ankyrin repeat and PH domain 3       | 0.513 |
| 300798653 | ALPK3         | alpha kinase 3                                                  | 0.515 |
| 240255436 | T2            | brachyury 2                                                     | 0.515 |
| 672057962 | N/A           | N/A                                                             | 0.517 |
| 157821277 | HAUS3         | HAUS augmin like complex subunit 3                              | 0.518 |
| 19424300  | GCHFR         | GTP cyclohydrolase I feedback regulator                         | 0.519 |
| 54312090  | RBM47         | RNA binding motif protein 47                                    | 0.522 |
| 195539325 | MTBP          | MDM2 binding protein                                            | 0.523 |
| 537271325 | N/A           | N/A                                                             | 0.524 |
| 89145411  | SULT2B1       | sulfotransferase family 2B member 1                             | 0.524 |
| 149066158 | ZNF623        | zinc finger protein 623                                         | 0.528 |
| 62078463  | LPP           | LIM domain containing preferred translocation partner in lipoma | 0.528 |
| 955534901 | N/A           | N/A                                                             | 0.530 |
| 404434380 | ZNF133        | zinc finger protein 133                                         | 0.530 |
| 77627983  | MLX           | MLX, MAX dimerization protein                                   | 0.531 |
| 112984176 | EPSTI1        | epithelial stromal interaction 1                                | 0.532 |
| 4507133   | SNRPG         | small nuclear ribonucleoprotein polypeptide G                   | 0.533 |
| 21955136  | MXD3          | MAX dimerization protein 3                                      | 0.535 |
| 564320728 | Fbxo38        | F-box protein 38                                                | 0.537 |
| 148673911 | Gm21596/Hmgb1 | high mobility group box 1                                       | 0.538 |
| 205830438 | MYH1          | myosin heavy chain 1                                            | 0.541 |
| 672056683 | N/A           | N/A                                                             | 0.541 |
| 157821317 | Ifitm1        | interferon induced transmembrane protein 1                      | 0.545 |
| 306482607 | DENND2C       | DENN domain containing 2C                                       | 0.547 |
| 672026767 | N/A           | N/A                                                             | 0.549 |
| 148687591 | TMEM132D      | transmembrane protein 132D                                      | 0.550 |
| 213688370 | EXOSC7        | exosome component 7                                             | 0.551 |
| 564315667 | CLASP1        | cytoplasmic linker associated protein 1                         | 0.555 |
| 564320454 | SAP130        | Sin3A associated protein 130                                    | 0.559 |
| 568916876 | GREM1         | gremlin 1, DAN family BMP antagonist                            | 0.559 |
| 219879771 | PGAP3         | post-GPI attachment to proteins 3                               | 0.560 |
| 157820217 | Gsta4         | glutathione S-transferase, alpha 4                              | 0.560 |
| 474451689 | RASEF         | RAS and EF-hand domain containing                               | 0.560 |
| 13928942  | PER2          | period circadian regulator 2                                    | 0.562 |
| 625253043 | N/A           | N/A                                                             | 0.562 |
| 62640766  | GDPGP1        | GDP-D-glucose phosphorylase 1                                   | 0.562 |

|           |         |                                                       |       |
|-----------|---------|-------------------------------------------------------|-------|
| 149025256 | NGB     | neuroglobin                                           | 0.563 |
| 149056609 | DEDD2   | death effector domain containing 2                    | 0.565 |
| 62078827  | CTDSPL2 | CTD small phosphatase like 2                          | 0.570 |
| 52851389  | OSMR    | oncostatin M receptor                                 | 0.570 |
| 62078983  | DNAJC28 | DnaJ heat shock protein family (Hsp40) member C28     | 0.570 |
| 149023178 | CEP152  | centrosomal protein 152                               | 0.572 |
| 148692940 | WAPL    | WAPL cohesin release factor                           | 0.573 |
| 672029702 | ZCCHC6  | zinc finger CCHC-type containing 6                    | 0.576 |
| 157822673 | HS3ST5  | heparan sulfate-glucosamine 3-sulfotransferase 5      | 0.577 |
| 564372912 | GPS2    | G protein pathway suppressor 2                        | 0.577 |
| 74186677  | SIN3B   | SIN3 transcription regulator family member B          | 0.578 |
| 71051382  | Fhl4    | four and a half LIM domains 4                         | 0.581 |
| 148664537 | Gm10269 | ribosomal protein L35 pseudogene                      | 0.582 |
| 149016587 | N/A     | N/A                                                   | 0.583 |
| 555290059 | MED7    | mediator complex subunit 7                            | 0.584 |
| 17105344  | KLHL41  | kelch like family member 41                           | 0.585 |
| 16758872  | CDH17   | cadherin 17                                           | 0.585 |
| 148705473 | FAM53A  | family with sequence similarity 53 member A           | 0.585 |
| 12621078  | PTPRQ   | protein tyrosine phosphatase, receptor type Q         | 0.585 |
| 511094004 | RUNX2   | runt related transcription factor 2                   | 0.585 |
| 16924020  | XPNPEP2 | X-prolyl aminopeptidase 2                             | 0.585 |
| 564315183 | CUX1    | cut like homeobox 1                                   | 0.585 |
| 148701441 | N/A     | N/A                                                   | 0.585 |
| 386869333 | TFF3    | trefoil factor 3                                      | 0.589 |
| 564295968 | ADGRG6  | adhesion G protein-coupled receptor G6                | 0.590 |
| 564386624 | AMER2   | APC membrane recruitment protein 2                    | 0.591 |
| 564304579 | ATF7IP  | activating transcription factor 7 interacting protein | 0.591 |
| 564303143 | KMT2C   | lysine methyltransferase 2C                           | 0.593 |
| 157786962 | NANOS3  | nanos C2HC-type zinc finger 3                         | 0.596 |
| 148705043 | RRM2    | ribonucleotide reductase regulatory subunit M2        | 0.596 |
| 62078705  | STBD1   | starch binding domain 1                               | 0.601 |
| 148683584 | VEPH1   | ventricular zone expressed PH domain containing 1     | 0.603 |
| 564337450 | S100A9  | S100 calcium binding protein A9                       | 0.603 |
| 537191098 | N/A     | N/A                                                   | 0.603 |
| 344248288 | N/A     | N/A                                                   | 0.603 |
| 24415396  | GPR3    | G protein-coupled receptor 3                          | 0.604 |



|           |              |                                                                  |       |
|-----------|--------------|------------------------------------------------------------------|-------|
| 114145465 | LOC689840    | LRRGT00142                                                       | 0.604 |
| 21703842  | RTCB         | RNA 2',3'-cyclic phosphate and 5'-OH ligase                      | 0.609 |
| 672065765 | KCNE4        | potassium voltage-gated channel subfamily E regulatory subunit 4 | 0.609 |
| 149038509 | N/A          | N/A                                                              | 0.611 |
| 13994119  | KHK          | ketoheokinase                                                    | 0.612 |
| 8393564   | HRH1         | histamine receptor H1                                            | 0.615 |
| 22122541  | LRRC3B       | leucine rich repeat containing 3B                                | 0.615 |
| 203096609 | GABPB1       | GA binding protein transcription factor beta subunit 1           | 0.616 |
| 148702599 | UNK          | unkempt family zinc finger                                       | 0.619 |
| 672053077 | N/A          | N/A                                                              | 0.620 |
| 157822359 | PELI2        | pellino E3 ubiquitin protein ligase family member 2              | 0.620 |
| 197386987 | HDX          | highly divergent homeobox                                        | 0.620 |
| 148702471 | N/A          | N/A                                                              | 0.620 |
| 149035460 | N/A          | N/A                                                              | 0.622 |
| 157820433 | CPEB1        | cytoplasmic polyadenylation element binding protein 1            | 0.624 |
| 187957728 | FANCM        | Fanconi anemia complementation group M                           | 0.625 |
| 38016150  | QRFPR        | pyroglutamylated RFamide peptide receptor                        | 0.625 |
| 148689488 | SYN3         | synapsin III                                                     | 0.627 |
| 672068300 | TOP3A        | DNA topoisomerase III alpha                                      | 0.629 |
| 1083798   | Bmpr1b       | bone morphogenetic protein receptor type 1B                      | 0.630 |
| 198386330 | CCDC89       | coiled-coil domain containing 89                                 | 0.630 |
| 149048372 | N/A          | N/A                                                              | 0.632 |
| 149048372 | N/A          | N/A                                                              | 0.632 |
| 149048372 | N/A          | N/A                                                              | 0.632 |
| 197386066 | ZNF784       | zinc finger protein 784                                          | 0.633 |
| 564389552 | LOC100910854 | zinc finger MYND domain-containing protein 19-like               | 0.635 |
| 564303706 | OSBPL3       | oxysterol binding protein like 3                                 | 0.637 |
| 564339225 | N/A          | N/A                                                              | 0.637 |
| 186659510 | MYH6         | myosin heavy chain 6                                             | 0.637 |
| 157823803 | DOK3         | docking protein 3                                                | 0.639 |
| 39104628  | SORBS1       | sorbin and SH3 domain containing 1                               | 0.639 |
| 148693644 | N/A          | N/A                                                              | 0.642 |
| 672043573 | LOC100363520 | mCG16729-like                                                    | 0.643 |
| 564318727 | Zfp961       | zinc finger protein 961                                          | 0.643 |
| 564400410 | AMOT         | angiomotin                                                       | 0.644 |

|           |                           |                                                                      |       |
|-----------|---------------------------|----------------------------------------------------------------------|-------|
| 568907669 | NYAP2                     | neuronal tyrosine-phosphorylated phosphoinositide-3-kinase adaptor 2 | 0.645 |
| 16758796  | INPP4B                    | inositol polyphosphate-4-phosphatase type II B                       | 0.646 |
| 672066276 | N/A                       | N/A                                                                  | 0.648 |
| 281604200 | COL9A1                    | collagen type IX alpha 1 chain                                       | 0.648 |
| 149025186 | RPS6KL1                   | ribosomal protein S6 kinase like 1                                   | 0.661 |
| 149031102 | N/A                       | N/A                                                                  | 0.662 |
| 564327667 | TSHZ3                     | teashirt zinc finger homeobox 3                                      | 0.664 |
| 149021160 | N/A                       | N/A                                                                  | 0.665 |
| 256220048 | PCDHGC5                   | protocadherin gamma subfamily C, 5                                   | 0.666 |
| 157823385 | SLITRK6                   | SLIT and NTRK like family member 6                                   | 0.667 |
| 913498340 | N/A                       | N/A                                                                  | 0.669 |
| 704532863 | N/A                       | N/A                                                                  | 0.671 |
| 112984092 | RPRM                      | reprimo, TP53 dependent G2 arrest mediator homolog                   | 0.675 |
| 51890226  | IL17RE                    | interleukin 17 receptor E                                            | 0.678 |
| 71896574  | Sult1c2 (includes others) | sulfotransferase family 1C member 2                                  | 0.678 |
| 676270739 | N/A                       | N/A                                                                  | 0.689 |
| 149052692 | N/A                       | N/A                                                                  | 0.689 |
| 149016574 | ZNF324                    | zinc finger protein 324                                              | 0.689 |
| 157822083 | PBX4                      | PBX homeobox 4                                                       | 0.690 |
| 672013556 | N/A                       | N/A                                                                  | 0.690 |
| 672015275 | N/A                       | N/A                                                                  | 0.691 |
| 66730382  | TRNT1                     | tRNA nucleotidyl transferase 1                                       | 0.692 |
| 148693601 | N/A                       | N/A                                                                  | 0.692 |
| 6978894   | GIPR                      | gastric inhibitory polypeptide receptor                              | 0.699 |
| 112984482 | SBSN                      | suprabasin                                                           | 0.700 |
| 197387536 | TEX26                     | testis expressed 26                                                  | 0.706 |
| 61557100  | PLEKHF1                   | pleckstrin homology and FYVE domain containing 1                     | 0.707 |
| 348041347 | CENPL                     | centromere protein L                                                 | 0.708 |
| 392354293 | Hmgb3                     | high mobility group box 3                                            | 0.709 |
| 675743174 | N/A                       | N/A                                                                  | 0.710 |
| 149058952 | MEF2C                     | myocyte enhancer factor 2C                                           | 0.716 |
| 149062619 | CBWD1                     | COBW domain containing 1                                             | 0.717 |
| 80861398  | CRY1                      | cryptochrome circadian regulator 1                                   | 0.720 |
| 672049461 | N/A                       | N/A                                                                  | 0.721 |
| 148701660 | FSTL4                     | follistatin like 4                                                   | 0.724 |
| 148704285 | CBLN3                     | cerebellin 3 precursor                                               | 0.724 |

|           |           |                                                                    |       |
|-----------|-----------|--------------------------------------------------------------------|-------|
| 281485597 | PRDM9     | PR/SET domain 9                                                    | 0.726 |
| 148698485 | N/A       | N/A                                                                | 0.731 |
| 672028080 | PRR14L    | proline rich 14 like                                               | 0.733 |
| 564389875 | ARHGEF10  | Rho guanine nucleotide exchange factor 10                          | 0.734 |
| 38454200  | CHDH      | choline dehydrogenase                                              | 0.734 |
| 672014266 | TMEM219   | transmembrane protein 219                                          | 0.735 |
| 20302047  | AMPD1     | adenosine monophosphate deaminase 1                                | 0.737 |
| 77539456  | C4BPA     | complement component 4 binding protein alpha                       | 0.737 |
| 84781680  | CNKSR1    | connector enhancer of kinase suppressor of Ras 1                   | 0.737 |
| 672059431 | SLC39A4   | solute carrier family 39 member 4                                  | 0.737 |
| 6681177   | TWIST2    | twist family bHLH transcription factor 2                           | 0.737 |
| 6978663   | CLCN1     | chloride voltage-gated channel 1                                   | 0.742 |
| 157818947 | FAAP24    | Fanconi anemia core complex associated protein 24                  | 0.744 |
| 731286412 | N/A       | N/A                                                                | 0.746 |
| 564297338 | ZNF816    | zinc finger protein 816                                            | 0.748 |
| 293339965 | RAB11FIP3 | RAB11 family interacting protein 3                                 | 0.750 |
| 403420582 | TMEM71    | transmembrane protein 71                                           | 0.767 |
| 431895836 | N/A       | N/A                                                                | 0.768 |
| 672070295 | BAHCC1    | BAH domain and coiled-coil containing 1                            | 0.769 |
| 157817525 | LGR5      | leucine rich repeat containing G protein-coupled receptor 5        | 0.772 |
| 431916930 | N/A       | N/A                                                                | 0.777 |
| 564298396 | ZNF764    | zinc finger protein 764                                            | 0.777 |
| 564358680 | N/A       | N/A                                                                | 0.777 |
| 114145559 | ARSI      | arylsulfatase family member I                                      | 0.778 |
| 453178    | AMHR2     | anti-Mullerian hormone receptor type 2                             | 0.778 |
| 452085169 | BCO1      | beta-carotene oxygenase 1                                          | 0.778 |
| 62078489  | CLHC1     | clathrin heavy chain linker domain containing 1                    | 0.778 |
| 58865600  | LAMP3     | lysosomal associated membrane protein 3                            | 0.778 |
| 282397098 | PRR30     | proline rich 30                                                    | 0.778 |
| 149042882 | ZNF334    | zinc finger protein 334                                            | 0.779 |
| 58865510  | GIMAP6    | GTPase, IMAP family member 6                                       | 0.783 |
| 755566692 | HUWE1     | HECT, UBA and WWE domain containing 1, E3 ubiquitin protein ligase | 0.787 |
| 752423229 | N/A       | N/A                                                                | 0.789 |
| 564316247 | CEP170    | centrosomal protein 170                                            | 0.793 |
| 672031995 | Kdm6a     | lysine demethylase 6A                                              | 0.794 |
| 564297423 | FAM71E1   | family with sequence similarity 71 member E1                       | 0.803 |

|           |          |                                                           |       |
|-----------|----------|-----------------------------------------------------------|-------|
| 564377118 | WDR53    | WD repeat domain 53                                       | 0.807 |
| 6978801   | CELA1    | chymotrypsin like elastase family member 1                | 0.807 |
| 56606104  | Aox4     | aldehyde oxidase 4                                        | 0.807 |
| 6978747   | Cyp2d26  | cytochrome P450, family 2, subfamily d, polypeptide 26    | 0.807 |
| 149024681 | N/A      | N/A                                                       | 0.813 |
| 568921554 | Ank2     | ankyrin 2, brain                                          | 0.813 |
| 300795362 | PTCHD1   | patched domain containing 1                               | 0.820 |
| 293348634 | LRIG3    | leucine rich repeats and immunoglobulin like domains 3    | 0.825 |
| 568975399 | FAM114A2 | family with sequence similarity 114 member A2             | 0.827 |
| 157818453 | CXorf21  | chromosome X open reading frame 21                        | 0.830 |
| 294979130 | FOXP3    | forkhead box P3                                           | 0.830 |
| 149025130 | Fam161b  | family with sequence similarity 161, member B             | 0.832 |
| 672086719 | FAM184A  | family with sequence similarity 184 member A              | 0.836 |
| 26024223  | ABCG5    | ATP binding cassette subfamily G member 5                 | 0.841 |
| 16758770  | F2RL1    | F2R like trypsin receptor 1                               | 0.842 |
| 149025439 | DICER1   | dicer 1, ribonuclease III                                 | 0.846 |
| 158517955 | PKHD1L1  | PKHD1 like 1                                              | 0.848 |
| 755528524 | N/A      | N/A                                                       | 0.849 |
| 189011634 | ARMC7    | armadillo repeat containing 7                             | 0.850 |
| 58865582  | Irgm1    | immunity-related GTPase family M member 1                 | 0.856 |
| 293347270 | OSGIN2   | oxidative stress induced growth inhibitor family member 2 | 0.861 |
| 16758000  | CXCR5    | C-X-C motif chemokine receptor 5                          | 0.862 |
| 564378170 | PAN3     | PAN3 poly(A) specific ribonuclease subunit                | 0.863 |
| 568959785 | PRDM10   | PR/SET domain 10                                          | 0.865 |
| 6978657   | CHRNB1   | cholinergic receptor nicotinic beta 1 subunit             | 0.865 |
| 471359561 | N/A      | N/A                                                       | 0.871 |
| 121583673 | CACTIN   | cactin, spliceosome C complex subunit                     | 0.872 |
| 157822171 | C1orf210 | chromosome 1 open reading frame 210                       | 0.874 |
| 672058654 | CAPS2    | calcyphosine 2                                            | 0.874 |
| 157821967 | SLC45A2  | solute carrier family 45 member 2                         | 0.874 |
| 537222639 | N/A      | N/A                                                       | 0.880 |
| 78097110  | N4BP2L1  | NEDD4 binding protein 2 like 1                            | 0.885 |
| 672025117 | MBTD1    | mbt domain containing 1                                   | 0.886 |
| 589930143 | N/A      | N/A                                                       | 0.893 |
| 564302768 | KIAA1755 | KIAA1755                                                  | 0.906 |
| 672088752 | MCF2     | MCF.2 cell line derived transforming sequence             | 0.909 |
| 157820193 | Tbx2     | T-box 2                                                   | 0.909 |

|           |                                |                                                                |       |
|-----------|--------------------------------|----------------------------------------------------------------|-------|
| 672015368 | MAST4                          | microtubule associated serine/threonine kinase family member 4 | 0.909 |
| 672051730 | N/A                            | N/A                                                            | 0.909 |
| 71795623  | ELMO3                          | engulfment and cell motility 3                                 | 0.910 |
| 392339806 | CFAP69                         | cilia and flagella associated protein 69                       | 0.915 |
| 16758266  | NME3                           | NME/NM23 nucleoside diphosphate kinase 3                       | 0.921 |
| 568929584 | TRIM62                         | tripartite motif containing 62                                 | 0.922 |
| 829796090 | N/A                            | N/A                                                            | 0.922 |
| 562838033 | N/A                            | N/A                                                            | 0.926 |
| 672051147 | N/A                            | N/A                                                            | 0.928 |
| 564378170 | PAN3                           | PAN3 poly(A) specific ribonuclease subunit                     | 0.932 |
| 50845391  | LY6G5B                         | lymphocyte antigen 6 family member G5B                         | 0.936 |
| 564318679 | CCSER2                         | coiled-coil serine rich protein 2                              | 0.939 |
| 186972129 | TMPRSS9                        | transmembrane protease, serine 9                               | 0.941 |
| 149033319 | PRR15                          | proline rich 15                                                | 0.943 |
| 28972035  | NUP214                         | nucleoporin 214                                                | 0.944 |
| 293353154 | TBC1D1                         | TBC1 domain family member 1                                    | 0.949 |
| 58865986  | RNASE12                        | ribonuclease A family member 12 (inactive)                     | 0.954 |
| 157823859 | METTL27                        | methyltransferase like 27                                      | 0.958 |
| 57012446  | Krt42                          | keratin 42                                                     | 0.959 |
| 23463263  | NPW                            | neuropeptide W                                                 | 0.962 |
| 564395190 | LOC100909409 (includes others) | RGD1562660                                                     | 0.962 |
| 9506775   | HES2                           | hes family bHLH transcription factor 2                         | 0.963 |
| 564312671 | N/A                            | N/A                                                            | 0.965 |
| 157821687 | NEURL2                         | neuralized E3 ubiquitin protein ligase 2                       | 0.966 |
| 209571573 | ZNF707                         | zinc finger protein 707                                        | 0.966 |
| 68062078  | N/A                            | N/A                                                            | 0.968 |
| 148693657 | DDX6                           | DEAD-box helicase 6                                            | 0.969 |
| 672043253 | DENND4B                        | DENN domain containing 4B                                      | 0.969 |
| 755515866 | BRAF                           | B-Raf proto-oncogene, serine/threonine kinase                  | 0.990 |
| 149030324 | CHRNA2                         | cholinergic receptor nicotinic alpha 2 subunit                 | 0.994 |
| 1438906   | NPY5R                          | neuropeptide Y receptor Y5                                     | 1.000 |
| 53734355  | P2RY14                         | purinergic receptor P2Y14                                      | 1.000 |
| 149035338 | APBB2                          | amyloid beta precursor protein binding family B member 2       | 1.000 |
| 149065466 | ARHGEF5                        | Rho guanine nucleotide exchange factor 5                       | 1.000 |
| 148235584 | CLEC4A                         | C-type lectin domain family 4 member A                         | 1.000 |
| 58865742  | CYTIP                          | cytohesin 1 interacting protein                                | 1.000 |
| 82654234  | LILRA6                         | leukocyte immunoglobulin like receptor A6                      | 1.000 |

|           |         |                                                                  |       |
|-----------|---------|------------------------------------------------------------------|-------|
| 157787179 | POU2F3  | POU class 2 homeobox 3                                           | 1.000 |
| 157786830 | RILP    | Rab interacting lysosomal protein                                | 1.000 |
| 564395350 | N/A     | N/A                                                              | 1.000 |
| 157817241 | ISCA2   | iron-sulfur cluster assembly 2                                   | 1.006 |
| 961454277 | Dmd     | dystrophin                                                       | 1.007 |
| 149042010 | Dapk2   | death-associated protein kinase 2                                | 1.010 |
| 672087472 | REPS2   | RALBP1 associated Eps domain containing 2                        | 1.012 |
| 672026785 | N/A     | N/A                                                              | 1.013 |
| 149059246 | N/A     | N/A                                                              | 1.014 |
| 149041229 | N/A     | N/A                                                              | 1.018 |
| 672087657 | N/A     | N/A                                                              | 1.027 |
| 672083970 | N/A     | N/A                                                              | 1.033 |
| 404501522 | NXNL1   | nucleoredoxin like 1                                             | 1.037 |
| 109512267 | N/A     | N/A                                                              | 1.037 |
| 148674299 | Gm14176 | ubiquitin-conjugating enzyme E2I pseudogene                      | 1.041 |
| 61097928  | SNAI1   | snail family transcriptional repressor 1                         | 1.053 |
| 16758598  | CYP27B1 | cytochrome P450 family 27 subfamily B member 1                   | 1.054 |
| 86129546  | ZDHHC22 | zinc finger DHHC-type containing 22                              | 1.056 |
| 149067796 | TMEM219 | transmembrane protein 219                                        | 1.064 |
| 149018242 | N/A     | N/A                                                              | 1.065 |
| 19424314  | KCNE2   | potassium voltage-gated channel subfamily E regulatory subunit 2 | 1.066 |
| 672080026 | N/A     | N/A                                                              | 1.070 |
| 564296988 | ZNF235  | zinc finger protein 235                                          | 1.072 |
| 148665412 | N/A     | N/A                                                              | 1.074 |
| 157818609 | NT5C1A  | 5'-nucleotidase, cytosolic IA                                    | 1.075 |
| 16758572  | DLK1    | delta like non-canonical Notch ligand 1                          | 1.086 |
| 157819397 | CD22    | CD22 molecule                                                    | 1.100 |
| 281306708 | VSX2    | visual system homeobox 2                                         | 1.108 |
| 537260438 | N/A     | N/A                                                              | 1.109 |
| 7242211   | TRH     | thyrotropin releasing hormone                                    | 1.113 |
| 8393654   | KCNJ5   | potassium voltage-gated channel subfamily J member 5             | 1.115 |
| 672082610 | N/A     | N/A                                                              | 1.117 |
| 149066891 | Lyc2    | lysozyme C type 2                                                | 1.126 |
| 188536090 | FAM241B | family with sequence similarity 241 member B                     | 1.127 |
| 392339412 | PLA2G4E | phospholipase A2 group IVE                                       | 1.128 |
| 12083683  | SRD5A2  | steroid 5 alpha-reductase 2                                      | 1.128 |
| 672054835 | N/A     | N/A                                                              | 1.131 |

|           |           |                                                                  |       |
|-----------|-----------|------------------------------------------------------------------|-------|
| 157786632 | ZMYND15   | zinc finger MYND-type containing 15                              | 1.152 |
| 37693512  | TLR9      | toll like receptor 9                                             | 1.160 |
| 564372692 | N/A       | N/A                                                              | 1.162 |
| 300796953 | SYCE2     | synaptonemal complex central element protein 2                   | 1.163 |
| 149042270 | LAS1L     | LAS1 like, ribosome biogenesis factor                            | 1.169 |
| 62078917  | PAQR5     | progesterin and adipoQ receptor family member 5                  | 1.181 |
| 6978525   | FASLG     | Fas ligand                                                       | 1.186 |
| 564306247 | PHACTR4   | phosphatase and actin regulator 4                                | 1.189 |
| 6978493   | ALOX5     | arachidonate 5-lipoxygenase                                      | 1.193 |
| 16758320  | TNFSF4    | TNF superfamily member 4                                         | 1.193 |
| 149047683 | N/A       | N/A                                                              | 1.195 |
| 40786461  | NAPEPLD   | N-acyl phosphatidylethanolamine phospholipase D                  | 1.199 |
| 6981080   | IGFBP1    | insulin like growth factor binding protein 1                     | 1.209 |
| 564306696 | SRBD1     | S1 RNA binding domain 1                                          | 1.216 |
| 287323377 | SLA2      | Src like adaptor 2                                               | 1.216 |
| 669303362 | N/A       | N/A                                                              | 1.221 |
| 11596857  | KCNE3     | potassium voltage-gated channel subfamily E regulatory subunit 3 | 1.222 |
| 157787081 | WNT1      | Wnt family member 1                                              | 1.222 |
| 564385630 | ACOX2     | acyl-CoA oxidase 2                                               | 1.222 |
| 149045964 | PTH2R     | parathyroid hormone 2 receptor                                   | 1.222 |
| 224967052 | TLR5      | toll like receptor 5                                             | 1.222 |
| 300793935 | GSX1      | GS homeobox 1                                                    | 1.225 |
| 157822667 | TAL2      | TAL bHLH transcription factor 2                                  | 1.226 |
| 564309671 | KIAA0895  | KIAA0895                                                         | 1.230 |
| 672056787 | PRIMA1    | proline rich membrane anchor 1                                   | 1.234 |
| 7106248   | ANKRD1    | ankyrin repeat domain 1                                          | 1.252 |
| 157786716 | USH1G     | USH1 protein network component sans                              | 1.256 |
| 157818969 | SEC14L4   | SEC14 like lipid binding 4                                       | 1.263 |
| 157818187 | Tfap2d    | transcription factor AP-2 delta                                  | 1.263 |
| 672023787 | N/A       | N/A                                                              | 1.264 |
| 157822485 | HIST1H2BN | histone cluster 1 H2B family member n                            | 1.265 |
| 476007854 | BFSP2     | beaded filament structural protein 2                             | 1.267 |
| 672068318 | PITPNM3   | PITPNM family member 3                                           | 1.283 |
| 537158431 | N/A       | N/A                                                              | 1.287 |
| 8393938   | PADI3     | peptidyl arginine deiminase 3                                    | 1.303 |
| 564317923 | SACS      | sacsin molecular chaperone                                       | 1.308 |
| 21070938  | OTOS      | otospiralin                                                      | 1.317 |

|           |                                |                                                        |       |
|-----------|--------------------------------|--------------------------------------------------------|-------|
| 564351511 | RGD1565987                     | similar to F-box and leucine-rich repeat protein 18    | 1.319 |
| 13928802  | WISP2                          | WNT1 inducible signaling pathway protein 2             | 1.322 |
| 149035901 | N/A                            | N/A                                                    | 1.322 |
| 149020413 | Zfp599                         | zinc finger protein 599                                | 1.322 |
| 568914642 | N/A                            | N/A                                                    | 1.333 |
| 392338392 | PCNT                           | pericentrin                                            | 1.342 |
| 913513476 | N/A                            | N/A                                                    | 1.342 |
| 568972622 | BPTF                           | bromodomain PHD finger transcription factor            | 1.343 |
| 56605846  | DPEP3                          | dipeptidase 3                                          | 1.348 |
| 2231145   | N/A                            | N/A                                                    | 1.354 |
| 961766127 | N/A                            | N/A                                                    | 1.355 |
| 564300485 | LOC102551095                   | uncharacterized LOC102551095                           | 1.355 |
| 140969796 | Cyp2c23                        | cytochrome P450, family 2, subfamily c, polypeptide 23 | 1.363 |
| 577019502 | OVOL3                          | ovo like zinc finger 3                                 | 1.363 |
| 829923130 | N/A                            | N/A                                                    | 1.364 |
| 31745152  | GPR151                         | G protein-coupled receptor 151                         | 1.379 |
| 672084787 | DPEP2                          | dipeptidase 2                                          | 1.392 |
| 121949750 | PTPN20                         | protein tyrosine phosphatase, non-receptor type 20     | 1.392 |
| 126517485 | TBC1D10C                       | TBC1 domain family member 10C                          | 1.392 |
| 564301284 | Ttf1                           | transcription termination factor, RNA polymerase I     | 1.402 |
| 569012000 | KLF8                           | Kruppel like factor 8                                  | 1.406 |
| 672084625 | LOC100909409 (includes others) | RGD1562660                                             | 1.407 |
| 564396366 | PCNX2                          | pecanex homolog 2                                      | 1.408 |
| 6981312   | OTC                            | ornithine carbamoyltransferase                         | 1.415 |
| 19173800  | Actn3                          | actinin alpha 3                                        | 1.415 |
| 57012346  | HLA-DQA1                       | major histocompatibility complex, class II, DQ alpha 1 | 1.415 |
| 106879208 | MYH4                           | myosin heavy chain 4                                   | 1.415 |
| 198442901 | PKDREJ                         | polycystin family receptor for egg jelly               | 1.415 |
| 62078839  | LRRC26                         | leucine rich repeat containing 26                      | 1.421 |
| 11024678  | Dbil5                          | diazepam binding inhibitor-like 5                      | 1.423 |
| 270133003 | H2-M5                          | histocompatibility 2, M region locus 5                 | 1.429 |
| 13277927  | RPLP0                          | ribosomal protein lateral stalk subunit P0             | 1.431 |
| 62079153  | PLET1                          | placenta expressed transcript 1                        | 1.433 |
| 564380493 | SLC45A3                        | solute carrier family 45 member 3                      | 1.441 |



|           |           |                                                           |       |
|-----------|-----------|-----------------------------------------------------------|-------|
| 157824012 | TRIM45    | tripartite motif containing 45                            | 1.444 |
| 564329918 | EMSY      | EMSY, BRCA2 interacting transcriptional repressor         | 1.449 |
| 56606094  | Aox2      | aldehyde oxidase 2                                        | 1.459 |
| 350534944 | STAB2     | stabilin 2                                                | 1.459 |
| 803286756 | N/A       | N/A                                                       | 1.475 |
| 84000579  | FTL       | ferritin light chain                                      | 1.478 |
| 149052674 | NMUR2     | neuromedin U receptor 2                                   | 1.485 |
| 157817264 | ANKRD23   | ankyrin repeat domain 23                                  | 1.505 |
| 625182464 | N/A       | N/A                                                       | 1.507 |
| 155369646 | AGBL4     | ATP/GTP binding protein like 4                            | 1.510 |
| 24899633  | SLC12A8   | solute carrier family 12 member 8                         | 1.519 |
| 124487463 | GPR161    | G protein-coupled receptor 161                            | 1.523 |
| 293347270 | OSGIN2    | oxidative stress induced growth inhibitor family member 2 | 1.541 |
| 74004170  | HIST1H2AM | histone cluster 1 H2A family member m                     | 1.549 |
| 54312124  | HCST      | hematopoietic cell signal transducer                      | 1.554 |
| 149031942 | N/A       | N/A                                                       | 1.558 |
| 564312944 | KIAA0753  | KIAA0753                                                  | 1.568 |
| 672088045 | N/A       | N/A                                                       | 1.568 |
| 568914628 | GARNL3    | GTPase activating Rap/RanGAP domain like 3                | 1.578 |
| 6981536   | SI        | sucrase-isomaltase                                        | 1.585 |
| 13928980  | AQP3      | aquaporin 3 (Gill blood group)                            | 1.585 |
| 58865680  | CES5A     | carboxylesterase 5A                                       | 1.585 |
| 291490665 | Gcg       | glucagon                                                  | 1.585 |
| 94400879  | HRH2      | histamine receptor H2                                     | 1.585 |
| 282154817 | PLA2R1    | phospholipase A2 receptor 1                               | 1.585 |
| 149058209 | SELE      | selectin E                                                | 1.585 |
| 158533972 | SPTA1     | spectrin alpha, erythrocytic 1                            | 1.585 |
| 11560026  | STC2      | stanniocalcin 2                                           | 1.585 |
| 56785424  | Vom2r31   | vomer nasal 2 receptor, 31                                | 1.585 |
| 24308466  | ITGB3     | integrin subunit beta 3                                   | 1.596 |
| 575403049 | ERBIN     | erbB2 interacting protein                                 | 1.596 |
| 157818463 | Gm38422   | predicted gene, 38422                                     | 1.597 |
| 564321167 | CHD9      | chromodomain helicase DNA binding protein 9               | 1.600 |
| 564296772 | N/A       | N/A                                                       | 1.601 |
| 672013187 | DMWD      | DM1 locus, WD repeat containing                           | 1.605 |
| 594061361 | N/A       | N/A                                                       | 1.609 |
| 23463269  | NPB       | neuropeptide B                                            | 1.609 |
| 564317999 | N/A       | N/A                                                       | 1.633 |

|           |              |                                                        |       |
|-----------|--------------|--------------------------------------------------------|-------|
| 58866012  | TRIM55       | tripartite motif containing 55                         | 1.644 |
| 672019789 | BTBD19       | BTB domain containing 19                               | 1.676 |
| 300795081 | B4GALNT3     | beta-1,4-N-acetyl-galactosaminyltransferase 3          | 1.678 |
| 157817368 | SPDEF        | SAM pointed domain containing ETS transcription factor | 1.681 |
| 19424330  | SLC25A21     | solute carrier family 25 member 21                     | 1.683 |
| 204595    | Hist1h1e     | histone cluster 1, H1e                                 | 1.688 |
| 408407614 | DNA2         | DNA replication helicase/nuclease 2                    | 1.697 |
| 11464989  | CD86         | CD86 molecule                                          | 1.700 |
| 41054896  | FUT7         | fucosyltransferase 7                                   | 1.700 |
| 157817658 | VIL1         | villin 1                                               | 1.700 |
| 149020581 | ZNF560       | zinc finger protein 560                                | 1.703 |
| 568990288 | NIPBL        | NIPBL, cohesin loading factor                          | 1.705 |
| 672035395 | DMWD         | DM1 locus, WD repeat containing                        | 1.706 |
| 564313512 | N/A          | N/A                                                    | 1.707 |
| 157816947 | GUCA1B       | guanylate cyclase activator 1B                         | 1.708 |
| 254553399 | FBXO24       | F-box protein 24                                       | 1.716 |
| 157819799 | IQCH         | IQ motif containing H                                  | 1.716 |
| 157786614 | MFSD6L       | major facilitator superfamily domain containing 6 like | 1.716 |
| 576080555 | GAPDH        | glyceraldehyde-3-phosphate dehydrogenase               | 1.720 |
| 594100882 | N/A          | N/A                                                    | 1.726 |
| 300795020 | DEF6         | DEF6, guanine nucleotide exchange factor               | 1.726 |
| 672088674 | N/A          | N/A                                                    | 1.726 |
| 157820841 | GP1BA        | glycoprotein Ib platelet alpha subunit                 | 1.726 |
| 569001477 | MTCL1        | microtubule crosslinking factor 1                      | 1.726 |
| 149046722 | IBSP         | integrin binding sialoprotein                          | 1.737 |
| 149032888 | LOC100910237 | uncharacterized LOC100910237                           | 1.751 |
| 300794357 | AOAH         | acyloxyacyl hydrolase                                  | 1.755 |
| 157820135 | CHRD2        | chordin like 2                                         | 1.762 |
| 13492975  | NR5A2        | nuclear receptor subfamily 5 group A member 2          | 1.778 |
| 157816967 | Gm4925       | predicted gene 4925                                    | 1.781 |
| 46237647  | PSORS1C2     | psoriasis susceptibility 1 candidate 2                 | 1.807 |
| 140970928 | DBH          | dopamine beta-hydroxylase                              | 1.807 |
| 402534543 | GABRR1       | gamma-aminobutyric acid type A receptor rho1 subunit   | 1.807 |
| 157821823 | Ngp          | neutrophilic granule protein                           | 1.807 |
| 564318930 | WDR17        | WD repeat domain 17                                    | 1.807 |
| 157818127 | CA7          | carbonic anhydrase 7                                   | 1.824 |
| 148230802 | Akr1c13      | aldo-keto reductase family 1, member C13               | 1.826 |

|           |              |                                                                           |       |
|-----------|--------------|---------------------------------------------------------------------------|-------|
| 207446700 | Sec1         | secretory blood group 1                                                   | 1.826 |
| 157787012 | SLAMF9       | SLAM family member 9                                                      | 1.841 |
| 392342449 | PRSS56       | protease, serine 56                                                       | 1.848 |
| 8393090   | CEBPE        | CCAAT/enhancer binding protein epsilon                                    | 1.858 |
| 149042883 | LOC100365365 | rCG32328-like                                                             | 1.861 |
| 16758254  | CNGA1        | cyclic nucleotide gated channel alpha 1                                   | 1.874 |
| 189181736 | LAD1         | ladinin 1                                                                 | 1.874 |
| 109488483 | KIAA0753     | KIAA0753                                                                  | 1.905 |
| 157821723 | Gm30289      | predicted gene, 30289                                                     | 1.907 |
| 564297942 | LOC103690302 | AF4/FMR2 family member 2                                                  | 1.909 |
| 149024390 | PLA2G2D      | phospholipase A2 group IID                                                | 1.914 |
| 955517176 | N/A          | N/A                                                                       | 1.918 |
| 162287188 | LIF          | LIF, interleukin 6 family cytokine                                        | 1.933 |
| 157820301 | TMEM202      | transmembrane protein 202                                                 | 1.934 |
| 672019792 | N/A          | N/A                                                                       | 1.935 |
| 13027398  | CD200R1      | CD200 receptor 1                                                          | 1.943 |
| 826279832 | N/A          | N/A                                                                       | 1.952 |
| 197381585 | Urah         | urate (5-hydroxyiso-) hydrolase                                           | 1.976 |
| 755495595 | PRRC2C       | proline rich coiled-coil 2C                                               | 1.981 |
| 149055781 | N/A          | N/A                                                                       | 1.994 |
| 148685413 | ATP2A1       | ATPase sarcoplasmic/endoplasmic reticulum Ca <sup>2+</sup> transporting 1 | 2.000 |
| 157823427 | KLHL31       | kelch like family member 31                                               | 2.000 |
| 51243038  | LY6G6D       | lymphocyte antigen 6 family member G6D                                    | 2.000 |
| 160961485 | MYLK3        | myosin light chain kinase 3                                               | 2.000 |
| 564374250 | NAGS         | N-acetylglutamate synthase                                                | 2.000 |
| 568979594 | SYT16        | synaptotagmin 16                                                          | 2.059 |
| 672070295 | BAHCC1       | BAH domain and coiled-coil containing 1                                   | 2.083 |
| 568995287 | MKL2         | MKL1/myocardin like 2                                                     | 2.087 |
| 300794644 | FREM3        | FRAS1 related extracellular matrix 3                                      | 2.087 |
| 564329926 | EMSY         | EMSY, BRCA2 interacting transcriptional repressor                         | 2.094 |
| 392354688 | LVRN         | laeverin                                                                  | 2.121 |
| 672067367 | BC049762     | cDNA sequence BC049762                                                    | 2.126 |
| 148675846 | FAM114A2     | family with sequence similarity 114 member A2                             | 2.128 |
| 157821741 | LY86         | lymphocyte antigen 86                                                     | 2.128 |
| 564312627 | ZFP62        | ZFP62 zinc finger protein                                                 | 2.139 |
| 28972866  | CSMD3        | CUB and Sushi multiple domains 3                                          | 2.140 |
| 568974167 | SLC26A11     | solute carrier family 26 member 11                                        | 2.149 |
| 564297852 | CRTC3        | CREB regulated transcription coactivator 3                                | 2.151 |

|           |              |                                                                                                 |       |
|-----------|--------------|-------------------------------------------------------------------------------------------------|-------|
| 564296586 | Zfp943       | zinc finger prtoein 943                                                                         | 2.170 |
| 109480102 | SMARCC2      | SWI/SNF related, matrix associated, actin dependent regulator of chromatin subfamily c member 2 | 2.178 |
| 149061720 | Tnnt3        | troponin T3, fast skeletal type                                                                 | 2.182 |
| 564329920 | EMSY         | EMSY, BRCA2 interacting transcriptional repressor                                               | 2.185 |
| 11024668  | AIPL1        | aryl hydrocarbon receptor interacting protein like 1                                            | 2.188 |
| 158508517 | SDS          | serine dehydratase                                                                              | 2.202 |
| 392343703 | LOC100911027 | protein MAL2-like                                                                               | 2.222 |
| 392342157 | PHIP         | pleckstrin homology domain interacting protein                                                  | 2.226 |
| 568964954 | EPB41L2      | erythrocyte membrane protein band 4.1 like 2                                                    | 2.228 |
| 392340509 | PTPRD        | protein tyrosine phosphatase, receptor type D                                                   | 2.231 |
| 293352381 | PAN3         | PAN3 poly(A) specific ribonuclease subunit                                                      | 2.239 |
| 56912237  | KRT28        | keratin 28                                                                                      | 2.241 |
| 564323057 | ARMCX4       | armadillo repeat containing, X-linked 4                                                         | 2.242 |
| 478536438 | N/A          | N/A                                                                                             | 2.259 |
| 149042879 | N/A          | N/A                                                                                             | 2.278 |
| 149053951 | N/A          | N/A                                                                                             | 2.298 |
| 197385133 | RGD1561157   | RGD1561157                                                                                      | 2.303 |
| 568941582 | IQSEC1       | IQ motif and Sec7 domain 1                                                                      | 2.308 |
| 56270329  | ATP1A4       | ATPase Na <sup>+</sup> /K <sup>+</sup> transporting subunit alpha 4                             | 2.322 |
| 300795696 | CACNA2D4     | calcium voltage-gated channel auxiliary subunit alpha2delta 4                                   | 2.322 |
| 71896592  | IGFALS       | insulin like growth factor binding protein acid labile subunit                                  | 2.322 |
| 8393941   | PADI4        | peptidyl arginine deiminase 4                                                                   | 2.322 |
| 564324736 | L3MBTL3      | L3MBTL3, histone methyl-lysine binding protein                                                  | 2.353 |
| 164448680 | HBB          | hemoglobin subunit beta                                                                         | 2.371 |
| 392342139 | TTC21A       | tetratricopeptide repeat domain 21A                                                             | 2.389 |
| 157818163 | POF1B        | POF1B, actin binding protein                                                                    | 2.392 |
| 672053814 | N/A          | N/A                                                                                             | 2.392 |
| 149034139 | C10orf128    | chromosome 10 open reading frame 128                                                            | 2.406 |
| 56119154  | CPA6         | carboxypeptidase A6                                                                             | 2.415 |
| 987404821 | N/A          | N/A                                                                                             | 2.436 |
| 157819659 | RRH          | retinal pigment epithelium-derived rhodopsin homolog                                            | 2.447 |
| 672071273 | GRAMD1C      | GRAM domain containing 1C                                                                       | 2.450 |

|           |              |                                                          |       |
|-----------|--------------|----------------------------------------------------------|-------|
| 293356488 | RIC1         | RIC1 homolog, RAB6A GEF complex partner 1                | 2.479 |
| 157820647 | Scgb1c1      | secretoglobin, family 1C, member 1                       | 2.544 |
| 672013014 | N/A          | N/A                                                      | 2.561 |
| 387182    | HIST1H2AD    | histone cluster 1 H2A family member d                    | 2.562 |
| 13994175  | FUT2         | fucosyltransferase 2                                     | 2.585 |
| 157820271 | LOXL4        | lysyl oxidase like 4                                     | 2.585 |
| 13540693  | MYOC         | myocilin                                                 | 2.585 |
| 11120690  | NR1H4        | nuclear receptor subfamily 1 group H member 4            | 2.585 |
| 57222314  | OAS3         | 2'-5'-oligoadenylate synthetase 3                        | 2.585 |
| 564329376 | SRPK3        | SRSF protein kinase 3                                    | 2.585 |
| 157819281 | TRIM29       | tripartite motif containing 29                           | 2.585 |
| 8394529   | VDR          | vitamin D receptor                                       | 2.585 |
| 58866038  | XKRX         | XK related, X-linked                                     | 2.585 |
| 672038008 | N/A          | N/A                                                      | 2.585 |
| 148696062 | LRRC57       | leucine rich repeat containing 57                        | 2.603 |
| 672020363 | N/A          | N/A                                                      | 2.620 |
| 148702471 | N/A          | N/A                                                      | 2.698 |
| 157817726 | ARL5C        | ADP ribosylation factor like GTPase 5C                   | 2.737 |
| 392334596 | RSPH3        | radial spoke head 3 homolog                              | 2.755 |
| 9507065   | SCN11A       | sodium voltage-gated channel alpha subunit 11            | 2.755 |
| 521036477 | N/A          | N/A                                                      | 2.766 |
| 672027860 | APBB2        | amyloid beta precursor protein binding family B member 2 | 2.804 |
| 25742760  | AMH          | anti-Mullerian hormone                                   | 2.807 |
| 157787002 | Dpt          | dermatopontin                                            | 2.807 |
| 1890097   | IHH          | indian hedgehog                                          | 2.907 |
| 197384923 | C1orf87      | chromosome 1 open reading frame 87                       | 3.000 |
| 300796937 | ESPNL        | espin like                                               | 3.000 |
| 13591993  | MMP9         | matrix metalloproteinase 9                               | 3.000 |
| 472235305 | RPE65        | RPE65, retinoid isomerohydrolase                         | 3.000 |
| 564347547 | LOC103690120 | probable N-acetyltransferase CML1                        | 3.030 |
| 283135196 | THSD4        | thrombospondin type 1 domain containing 4                | 3.044 |
| 149029159 | N/A          | N/A                                                      | 3.080 |
| 564329920 | EMSY         | EMSY, BRCA2 interacting transcriptional repressor        | 3.112 |
| 672029704 | ZCCHC6       | zinc finger CCHC-type containing 6                       | 3.117 |
| 149020413 | Zfp599       | zinc finger protein 599                                  | 3.158 |
| 260099641 | MSH5         | mutS homolog 5                                           | 3.170 |
| 8393891   | P2RY2        | purinergic receptor P2Y2                                 | 3.170 |

|           |                        |                                                       |       |
|-----------|------------------------|-------------------------------------------------------|-------|
| 281332212 | SH2D4B                 | SH2 domain containing 4B                              | 3.170 |
| 564392795 | MOCOS                  | molybdenum cofactor sulfurase                         | 3.248 |
| 112984288 | STEAP4                 | STEAP4 metalloredutase                                | 3.248 |
| 672078236 | Gucy1b2                | guanylate cyclase 1, soluble, beta 2                  | 3.322 |
| 61556961  | THEG                   | theg spermatid protein                                | 3.322 |
| 50370130  | PALLD                  | palladin, cytoskeletal associated protein             | 3.361 |
| 28174920  | RPL17                  | ribosomal protein L17                                 | 3.389 |
| 293340128 | MIEF2                  | mitochondrial elongation factor 2                     | 3.426 |
| 569009290 | TENM1                  | teneurin transmembrane protein 1                      | 3.450 |
| 16758550  | BCL2L10                | BCL2 like 10                                          | 3.459 |
| 25282405  | BPIFA1                 | BPI fold containing family A member 1                 | 3.459 |
| 208022681 | Rhox2-ps               | reproductive homeobox 2, pseudogene                   | 3.459 |
| 299473749 | C1orf226               | chromosome 1 open reading frame 226                   | 3.496 |
| 672088045 | N/A                    | N/A                                                   | 3.600 |
| 148670929 | BATF                   | basic leucine zipper ATF-like transcription factor    | 3.700 |
| 148747510 | BAAT                   | bile acid-CoA:amino acid N-acyltransferase            | 3.807 |
| 21245088  | Ly6a (includes others) | lymphocyte antigen 6 complex, locus A                 | 3.807 |
| 158187515 | OAZ3                   | ornithine decarboxylase antizyme 3                    | 3.807 |
| 62078779  | ORAI3                  | ORAI calcium release-activated calcium modulator 3    | 3.807 |
| 850284744 | N/A                    | N/A                                                   | 3.858 |
| 672052120 | RBM12B                 | RNA binding motif protein 12B                         | 3.907 |
| 402747041 | FAM217A                | family with sequence similarity 217 member A          | 3.954 |
| 166157542 | PABPN1L                | poly(A) binding protein nuclear 1 like, cytoplasmic   | 3.954 |
| 755783452 | N/A                    | N/A                                                   | 4.087 |
| 392351087 | HAGHL                  | hydroxyacylglutathione hydrolase like                 | 4.120 |
| 23463315  | Cyp2d1/Cyp2d5          | cytochrome P450, family 2, subfamily d, polypeptide 1 | 4.170 |
| 564309734 | IGSF9B                 | immunoglobulin superfamily member 9B                  | 4.173 |
| 8393641   | AADAT                  | aminoadipate aminotransferase                         | 4.248 |
| 47577861  | OR7D2                  | olfactory receptor family 7 subfamily D member 2      | 4.248 |
| 564352686 | N/A                    | N/A                                                   | 4.248 |
| 165970757 | H2-T24                 | histocompatibility 2, T region locus 24               | 4.285 |
| 11024666  | NTRK1                  | neurotrophic receptor tyrosine kinase 1               | 4.285 |
| 300795122 | CLEC1B                 | C-type lectin domain family 1 member B                | 4.322 |

|           |         |                                                               |       |
|-----------|---------|---------------------------------------------------------------|-------|
| 27545443  | CEACAM4 | carcinoembryonic antigen related cell adhesion molecule 4     | 4.392 |
| 298231202 | PRG2    | proteoglycan 2, pro eosinophil major basic protein            | 4.426 |
| 555986737 | N/A     | N/A                                                           | 4.459 |
| 149038931 | CNTRL   | centriolin                                                    | 4.492 |
| 341940965 | MOS     | MOS proto-oncogene, serine/threonine kinase                   | 4.492 |
| 13928958  | CRYBB3  | crystallin beta B3                                            | 4.672 |
| 564308814 | N/A     | N/A                                                           | 4.700 |
| 149034317 | NUCKS1  | nuclear casein kinase and cyclin dependent kinase substrate 1 | 4.833 |
| 392333013 | CEP135  | centrosomal protein 135                                       | 4.858 |
| 9506733   | GJB5    | gap junction protein beta 5                                   | 4.907 |
| 293349510 | STAC    | SH3 and cysteine rich domain                                  | 4.954 |
| 392338425 | FAM184A | family with sequence similarity 184 member A                  | 5.000 |
| 672020628 | ATXN7L1 | ataxin 7 like 1                                               | 5.157 |
| 59709455  | EPOR    | erythropoietin receptor                                       | 5.170 |
| 8394516   | PLAUR   | plasminogen activator, urokinase receptor                     | 5.229 |
| 16758218  | Hamp    | hepcidin antimicrobial peptide                                | 5.267 |
| 392342412 | N/A     | N/A                                                           | 5.285 |
| 20301998  | PROK2   | prokineticin 2                                                | 5.358 |
| 70778849  | Abcg3   | ATP binding cassette subfamily G member 3                     | 5.392 |
| 157818205 | NOC3L   | NOC3 like DNA replication regulator                           | 5.833 |
| 351710149 | N/A     | N/A                                                           | 5.966 |
| 148705984 | Spink2  | serine peptidase inhibitor, Kazal type 2                      | 6.000 |
| 149054614 | N/A     | N/A                                                           | 6.066 |
| 672017085 | N/A     | N/A                                                           | 6.098 |
| 672052120 | RBM12B  | RNA binding motif protein 12B                                 | 6.366 |
| 149038394 | N/A     | N/A                                                           | 6.539 |
| 564316929 | FRYL    | FRY like transcription coactivator                            | 6.948 |
| 663243313 | N/A     | N/A                                                           | 7.098 |
| 672019127 | N/A     | N/A                                                           | 7.214 |
| 608785644 | NPAS3   | neuronal PAS domain protein 3                                 | 7.238 |
| 149026222 | N/A     | N/A                                                           | 7.353 |
| 300797609 | ELOVL7  | ELOVL fatty acid elongase 7                                   | 7.451 |
| 293347435 | PTPRD   | protein tyrosine phosphatase, receptor type D                 | 7.710 |
| 149057336 | ZSCAN2  | zinc finger and SCAN domain containing 2                      | 7.758 |
| 62650795  | DACT1   | dishevelled binding antagonist of beta catenin 1              | 7.762 |
| 109472884 | UBE3C   | ubiquitin protein ligase E3C                                  | 8.197 |
| 927135720 | N/A     | N/A                                                           | 8.311 |

| 672029702           | ZCCHC6        | zinc finger CCHC-type containing 6                                       | 8.441                 |
|---------------------|---------------|--------------------------------------------------------------------------|-----------------------|
| <b>DEGs in male</b> |               |                                                                          |                       |
| <b>ID</b>           | <b>Symbol</b> | <b>Entrez Gene Name</b>                                                  | <b>Expr Log Ratio</b> |
| 399154114           | KPNA2         | karyopherin subunit alpha 2                                              | -<br>10.164           |
| 564314532           | LRCH3         | leucine rich repeats and calponin homology domain containing 3           | -9.794                |
| 148675846           | FAM114A2      | family with sequence similarity 114 member A2                            | -9.570                |
| 672085486           | EGLN1         | egl-9 family hypoxia inducible factor 1                                  | -9.276                |
| 440913556           | N/A           | N/A                                                                      | -9.006                |
| 564378315           | Zfp853        | zinc finger protein 853                                                  | -8.895                |
| 672027854           | APBB2         | amyloid beta precursor protein binding family B member 2                 | -8.830                |
| 293349986           | SMCHD1        | structural maintenance of chromosomes flexible hinge domain containing 1 | -8.728                |
| 8393418             | GAPDH         | glyceraldehyde-3-phosphate dehydrogenase                                 | -8.658                |
| 672057084           | N/A           | N/A                                                                      | -8.611                |
| 392351087           | HAGHL         | hydroxyacylglutathione hydrolase like                                    | -8.539                |
| 50510463            | PRUNE2        | prune homolog 2                                                          | -8.443                |
| 392337738           | LYSMD4        | LysM domain containing 4                                                 | -8.426                |
| 189011657           | Uqcrb         | ubiquinol-cytochrome c reductase binding protein                         | -8.409                |
| 672035064           | N/A           | N/A                                                                      | -8.388                |
| 672088045           | N/A           | N/A                                                                      | -8.384                |
| 564324736           | L3MBTL3       | L3MBTL3, histone methyl-lysine binding protein                           | -8.349                |
| 157820217           | Gsta4         | glutathione S-transferase, alpha 4                                       | -8.317                |
| 564380050           | 2410141K09Rik | RIKEN cDNA 2410141K09 gene                                               | -8.234                |
| 672035060           | CIC           | capicua transcriptional repressor                                        | -8.114                |
| 197304784           | IQSEC1        | IQ motif and Sec7 domain 1                                               | -8.109                |
| 672032217           | REPS2         | RALBP1 associated Eps domain containing 2                                | -8.071                |
| 672088045           | N/A           | N/A                                                                      | -8.055                |
| 154090947           | NPAS3         | neuronal PAS domain protein 3                                            | -8.028                |
| 672040275           | CPEB3         | cytoplasmic polyadenylation element binding protein 3                    | -8.022                |
| 66730276            | C7orf49       | chromosome 7 open reading frame 49                                       | -7.989                |
| 672059354           | N/A           | N/A                                                                      | -7.983                |
| 564378170           | PAN3          | PAN3 poly(A) specific ribonuclease subunit                               | -7.966                |



|           |              |                                                                            |        |
|-----------|--------------|----------------------------------------------------------------------------|--------|
| 109484871 | HERC1        | HECT and RLD domain containing E3 ubiquitin protein ligase family member 1 | -7.895 |
| 564377502 | EIF4G1       | eukaryotic translation initiation factor 4 gamma 1                         | -7.870 |
| 392331668 | HAGHL        | hydroxyacylglutathione hydrolase like                                      | -7.864 |
| 755566690 | HUWE1        | HECT, UBA and WWE domain containing 1, E3 ubiquitin protein ligase         | -7.864 |
| 149051960 | FLYWCH2      | FLYWCH family member 2                                                     | -7.781 |
| 6690510   | CHD9         | chromodomain helicase DNA binding protein 9                                | -7.762 |
| 564311678 | PLEKHM3      | pleckstrin homology domain containing M3                                   | -7.748 |
| 293347435 | PTPRD        | protein tyrosine phosphatase, receptor type D                              | -7.707 |
| 564310551 | N/A          | N/A                                                                        | -7.679 |
| 34872960  | SMG8         | SMG8, nonsense mediated mRNA decay factor                                  | -7.600 |
| 149057336 | ZSCAN2       | zinc finger and SCAN domain containing 2                                   | -7.600 |
| 149029159 | N/A          | N/A                                                                        | -7.585 |
| 293341811 | PRR14L       | proline rich 14 like                                                       | -7.570 |
| 564313676 | FBF1         | Fas binding factor 1                                                       | -7.508 |
| 148704240 | ZMYM2        | zinc finger MYM-type containing 2                                          | -7.459 |
| 149047880 | SCAI         | suppressor of cancer cell invasion                                         | -7.426 |
| 66911867  | PHF20L1      | PHD finger protein 20 like 1                                               | -7.418 |
| 149020413 | Zfp599       | zinc finger protein 599                                                    | -7.375 |
| 564296586 | Zfp943       | zinc finger protein 943                                                    | -7.375 |
| 226698394 | UNC80        | unc-80 homolog, NALCN channel complex subunit                              | -7.349 |
| 564316241 | CEP170       | centrosomal protein 170                                                    | -7.322 |
| 293347435 | PTPRD        | protein tyrosine phosphatase, receptor type D                              | -7.304 |
| 293344558 | PCNX3        | pecanex homolog 3                                                          | -7.285 |
| 148675846 | FAM114A2     | family with sequence similarity 114 member A2                              | -7.276 |
| 564322493 | RPGR         | retinitis pigmentosa GTPase regulator                                      | -7.248 |
| 568979794 | NPAS3        | neuronal PAS domain protein 3                                              | -7.219 |
| 564315185 | CUX1         | cut like homeobox 1                                                        | -7.209 |
| 564375502 | Mxra7        | matrix-remodelling associated 7                                            | -7.209 |
| 672039093 | N/A          | N/A                                                                        | -7.209 |
| 672026702 | N/A          | N/A                                                                        | -7.180 |
| 672089723 | LOC103690073 | protein FAM76A                                                             | -7.160 |
| 564312627 | ZFP62        | ZFP62 zinc finger protein                                                  | -7.160 |
| 564305043 | RBM12B       | RNA binding motif protein 12B                                              | -7.150 |
| 672089122 | N/A          | N/A                                                                        | -7.150 |
| 564302768 | KIAA1755     | KIAA1755                                                                   | -7.077 |
| 564320728 | Fbxo38       | F-box protein 38                                                           | -7.066 |

|           |              |                                                             |        |
|-----------|--------------|-------------------------------------------------------------|--------|
| 564312515 | SH3PXD2B     | SH3 and PX domains 2B                                       | -7.066 |
| 625198911 | N/A          | N/A                                                         | -7.066 |
| 913507039 | N/A          | N/A                                                         | -7.055 |
| 672020363 | N/A          | N/A                                                         | -7.033 |
| 148694630 | N/A          | N/A                                                         | -6.919 |
| 149035005 | IQCE         | IQ motif containing E                                       | -6.907 |
| 755783452 | N/A          | N/A                                                         | -6.907 |
| 392339806 | CFAP69       | cilia and flagella associated protein 69                    | -6.895 |
| 672019578 | MYSM1        | Myb like, SWIRM and MPN domains 1                           | -6.895 |
| 564303135 | KMT2C        | lysine methyltransferase 2C                                 | -6.870 |
| 147907212 | ASAP2        | ArfGAP with SH3 domain, ankyrin repeat and PH domain 2      | -6.867 |
| 672029115 | N/A          | N/A                                                         | -6.845 |
| 672082610 | N/A          | N/A                                                         | -6.781 |
| 564314663 | VPS8         | VPS8, CORVET complex subunit                                | -6.755 |
| 564307783 | TECPR2       | tectonin beta-propeller repeat containing 2                 | -6.741 |
| 62644863  | NUP188       | nucleoporin 188                                             | -6.700 |
| 672031484 | PCNX2        | pecanex homolog 2                                           | -6.687 |
| 109460021 | KIAA2026     | KIAA2026                                                    | -6.658 |
| 564296517 | N/A          | N/A                                                         | -6.615 |
| 568992323 | CSMD3        | CUB and Sushi multiple domains 3                            | -6.508 |
| 672087657 | N/A          | N/A                                                         | -6.492 |
| 564314389 | DZIP3        | DAZ interacting zinc finger protein 3                       | -6.443 |
| 672024381 | N/A          | N/A                                                         | -6.443 |
| 564320724 | Fbxo38       | F-box protein 38                                            | -6.426 |
| 392338862 | ATP8B2       | ATPase phospholipid transporting 8B2                        | -6.358 |
| 149031942 | N/A          | N/A                                                         | -6.304 |
| 672060766 | N/A          | N/A                                                         | -6.304 |
| 672017191 | N/A          | N/A                                                         | -6.267 |
| 564318843 | PSD3         | pleckstrin and Sec7 domain containing 3                     | -6.248 |
| 109470195 | TNKS1BP1     | tankyrase 1 binding protein 1                               | -6.229 |
| 564302561 | KIZ          | kizuna centrosomal protein                                  | -6.209 |
| 109490297 | ABCA3        | ATP binding cassette subfamily A member 3                   | -6.190 |
| 672084304 | N/A          | N/A                                                         | -6.170 |
| 672089090 | LOC103694537 | mediator of RNA polymerase II transcription subunit 14-like | -6.109 |
| 564310188 | IGDCC4       | immunoglobulin superfamily DCC subclass member 4            | -6.087 |
| 672087664 | N/A          | N/A                                                         | -6.087 |
| 148684403 | N/A          | N/A                                                         | -6.087 |

|           |                             |                                                    |        |
|-----------|-----------------------------|----------------------------------------------------|--------|
| 564297387 | Zfp658                      | zinc finger protein 658                            | -6.022 |
| 149042879 | N/A                         | N/A                                                | -6.022 |
| 672041794 | RGD1310081                  | similar to hypothetical protein FLJ13231           | -6.000 |
| 568970987 | MBTD1                       | mbt domain containing 1                            | -5.977 |
| 672088045 | N/A                         | N/A                                                | -5.931 |
| 537216146 | N/A                         | N/A                                                | -5.931 |
| 149065087 | CADPS2                      | calcium dependent secretion activator 2            | -5.883 |
| 13242279  | GJA3                        | gap junction protein alpha 3                       | -5.883 |
| 164698411 | CTDSP2                      | CTD small phosphatase 2                            | -5.858 |
| 564307079 | ATXN7L1                     | ataxin 7 like 1                                    | -5.833 |
| 672079010 | N/A                         | N/A                                                | -5.833 |
| 672068318 | PITPNM3                     | PITPNM family member 3                             | -5.700 |
| 569009290 | TENM1                       | teneurin transmembrane protein 1                   | -5.700 |
| 564307173 | HEATR5A                     | HEAT repeat containing 5A                          | -5.672 |
| 109458652 | VSIG10L                     | V-set and immunoglobulin domain containing 10 like | -5.672 |
| 672063876 | MGC116197 (includes others) | similar to RIKEN cDNA 1700001E04                   | -5.644 |
| 672031167 | C19orf57                    | chromosome 19 open reading frame 57                | -5.615 |
| 564329920 | EMSY                        | EMSY, BRCA2 interacting transcriptional repressor  | -5.585 |
| 568941572 | IQSEC1                      | IQ motif and Sec7 domain 1                         | -5.585 |
| 392340959 | ITSN2                       | intersectin 2                                      | -5.585 |
| 294568    | LOC108348108                | heat shock 70 kDa protein 1A                       | -5.585 |
| 568979792 | NPAS3                       | neuronal PAS domain protein 3                      | -5.585 |
| 672069572 | KANSL1                      | KAT8 regulatory NSL complex subunit 1              | -5.555 |
| 31077126  | ROBO4                       | roundabout guidance receptor 4                     | -5.524 |
| 281306763 | NTN3                        | netrin 3                                           | -5.426 |
| 293346251 | TMEM62                      | transmembrane protein 62                           | -5.322 |
| 392334509 | N/A                         | N/A                                                | -5.285 |
| 148668227 | GPC6                        | glypican 6                                         | -5.248 |
| 564323075 | ZMAT1                       | zinc finger matrin-type 1                          | -5.129 |
| 672053077 | N/A                         | N/A                                                | -5.033 |
| 672066092 | UNC80                       | unc-80 homolog, NALCN channel complex subunit      | -4.954 |
| 672029704 | ZCCHC6                      | zinc finger CCHC-type containing 6                 | -4.937 |
| 149052470 | ZNF454                      | zinc finger protein 454                            | -4.807 |
| 564329926 | EMSY                        | EMSY, BRCA2 interacting transcriptional repressor  | -4.655 |
| 74184716  | Kat6b                       | K(lysine) acetyltransferase 6B                     | -4.644 |

|           |         |                                                               |        |
|-----------|---------|---------------------------------------------------------------|--------|
| 564342627 | TP53BP1 | tumor protein p53 binding protein 1                           | -4.594 |
| 114053317 | Aph1c   | aph1 homolog C, gamma secretase subunit                       | -4.459 |
| 568977658 | ASAP2   | ArfGAP with SH3 domain, ankyrin repeat and PH domain 2        | -4.392 |
| 392334411 | ANKRD11 | ankyrin repeat domain 11                                      | -4.358 |
| 564342632 | TP53BP1 | tumor protein p53 binding protein 1                           | -4.322 |
| 564305557 | PTPRD   | protein tyrosine phosphatase, receptor type D                 | -4.261 |
| 564305562 | PTPRD   | protein tyrosine phosphatase, receptor type D                 | -4.170 |
| 149020413 | Zfp599  | zinc finger protein 599                                       | -4.000 |
| 392340509 | PTPRD   | protein tyrosine phosphatase, receptor type D                 | -3.792 |
| 28972714  | KLHL13  | kelch like family member 13                                   | -3.463 |
| 564317997 | N/A     | N/A                                                           | -3.459 |
| 672026861 | N/A     | N/A                                                           | -3.459 |
| 564357330 | N/A     | N/A                                                           | -3.358 |
| 564321260 | N/A     | N/A                                                           | -3.298 |
| 672022282 | KIF21A  | kinesin family member 21A                                     | -3.257 |
| 109492822 | PAXBP1  | PAX3 and PAX7 binding protein 1                               | -3.208 |
| 913486723 | N/A     | N/A                                                           | -3.178 |
| 109498003 | ODR4    | odr-4 GPCR localization factor homolog                        | -3.170 |
| 54019438  | PCDHAC1 | protocadherin alpha subfamily C, 1                            | -3.170 |
| 655644820 | N/A     | N/A                                                           | -3.170 |
| 564397808 | HNRNPH3 | heterogeneous nuclear ribonucleoprotein H3                    | -3.035 |
| 564298047 | GDPD5   | glycerophosphodiester phosphodiesterase domain containing 5   | -3.017 |
| 20806113  | BAMBI   | BMP and activin membrane bound inhibitor                      | -2.929 |
| 564323078 | N/A     | N/A                                                           | -2.916 |
| 392331954 | KANSL1  | KAT8 regulatory NSL complex subunit 1                         | -2.915 |
| 747019224 | SRCAP   | Snf2 related CREBBP activator protein                         | -2.874 |
| 947324855 | N/A     | N/A                                                           | -2.791 |
| 124486586 | AUTS2   | AUTS2, activator of transcription and developmental regulator | -2.742 |
| 157819701 | Ctla2a  | cytotoxic T lymphocyte-associated protein 2 alpha             | -2.682 |
| 157818607 | C4orf46 | chromosome 4 open reading frame 46                            | -2.585 |
| 148682823 | N/A     | N/A                                                           | -2.547 |
| 61556945  | MOAP1   | modulator of apoptosis 1                                      | -2.508 |
| 564303143 | KMT2C   | lysine methyltransferase 2C                                   | -2.497 |
| 149037646 | N/A     | N/A                                                           | -2.478 |
| 672022270 | KIF21A  | kinesin family member 21A                                     | -2.422 |
| 672022227 | RGS22   | regulator of G protein signaling 22                           | -2.411 |

|           |          |                                                                    |        |
|-----------|----------|--------------------------------------------------------------------|--------|
| 564339225 | N/A      | N/A                                                                | -2.410 |
| 14277700  | RPS12    | ribosomal protein S12                                              | -2.381 |
| 564305934 | BTBD19   | BTB domain containing 19                                           | -2.363 |
| 817273427 | N/A      | N/A                                                                | -2.336 |
| 293351303 | METTL2   | methyltransferase like 22                                          | -2.334 |
| 67078412  | LRRC63   | leucine rich repeat containing 63                                  | -2.322 |
| 755566692 | HUWE1    | HECT, UBA and WWE domain containing 1, E3 ubiquitin protein ligase | -2.222 |
| 564321167 | CHD9     | chromodomain helicase DNA binding protein 9                        | -2.203 |
| 392331829 | ATAD5    | ATPase family, AAA domain containing 5                             | -2.188 |
| 149408137 | DHX58    | DEXH-box helicase 58                                               | -2.138 |
| 564311717 | KANSL1L  | KAT8 regulatory NSL complex subunit 1 like                         | -2.095 |
| 158711755 | C17orf97 | chromosome 17 open reading frame 97                                | -2.092 |
| 672074711 | N/A      | N/A                                                                | -2.071 |
| 56090600  | DNAI2    | dynein axonemal intermediate chain 2                               | -2.066 |
| 293340825 | USF3     | upstream transcription factor family member 3                      | -2.065 |
| 148702471 | N/A      | N/A                                                                | -2.048 |
| 209870097 | NLRP6    | NLR family pyrin domain containing 6                               | -1.977 |
| 157820267 | MEI4     | meiotic double-stranded break formation protein 4                  | -1.975 |
| 884945546 | N/A      | N/A                                                                | -1.956 |
| 124487463 | GPR161   | G protein-coupled receptor 161                                     | -1.954 |
| 918577634 | N/A      | N/A                                                                | -1.944 |
| 672079397 | CCDC66   | coiled-coil domain containing 66                                   | -1.932 |
| 149038394 | N/A      | N/A                                                                | -1.902 |
| 568959295 | Msantd2  | Myb/SANT-like DNA-binding domain containing 2                      | -1.891 |
| 568973498 | TNRC6C   | trinucleotide repeat containing 6C                                 | -1.886 |
| 293356488 | RIC1     | RIC1 homolog, RAB6A GEF complex partner 1                          | -1.826 |
| 68063179  | N/A      | N/A                                                                | -1.817 |
| 293349343 | MYO6     | myosin VI                                                          | -1.813 |
| 672038314 | N/A      | N/A                                                                | -1.800 |
| 57526854  | IFI35    | interferon induced protein 35                                      | -1.798 |
| 296486245 | N/A      | N/A                                                                | -1.783 |
| 148679862 | SLC35F3  | solute carrier family 35 member F3                                 | -1.767 |
| 817328905 | N/A      | N/A                                                                | -1.766 |
| 564331258 | ZNF688   | zinc finger protein 688                                            | -1.762 |
| 672029702 | ZCCHC6   | zinc finger CCHC-type containing 6                                 | -1.759 |
| 672073127 | WDR66    | WD repeat domain 66                                                | -1.737 |

|           |          |                                                           |        |
|-----------|----------|-----------------------------------------------------------|--------|
| 62079275  | Ptges3l1 | prostaglandin E synthase 3-like 1                         | -1.729 |
| 672025117 | MBTD1    | mbt domain containing 1                                   | -1.724 |
| 752993027 | HSPB1    | heat shock protein family B (small) member 1              | -1.704 |
| 672052399 | N/A      | N/A                                                       | -1.703 |
| 119226204 | CFAP206  | cilia and flagella associated protein 206                 | -1.697 |
| 564379810 | TMEM119  | transmembrane protein 119                                 | -1.693 |
| 8394221   | Rps3a1   | ribosomal protein S3A1                                    | -1.691 |
| 564315358 | N/A      | N/A                                                       | -1.686 |
| 594061361 | N/A      | N/A                                                       | -1.675 |
| 8393742   | MAG      | myelin associated glycoprotein                            | -1.661 |
| 942065067 | N/A      | N/A                                                       | -1.658 |
| 74271851  | CLDN23   | claudin 23                                                | -1.637 |
| 149025029 | SUSD6    | sushi domain containing 6                                 | -1.637 |
| 392339263 | PKP4     | plakophilin 4                                             | -1.635 |
| 124378035 | TNRC6C   | trinucleotide repeat containing 6C                        | -1.634 |
| 57526957  | ACY3     | aminoacylase 3                                            | -1.624 |
| 672040664 | CFAP43   | cilia and flagella associated protein 43                  | -1.622 |
| 625210478 | N/A      | N/A                                                       | -1.619 |
| 149025439 | DICER1   | dicer 1, ribonuclease III                                 | -1.603 |
| 293347270 | OSGIN2   | oxidative stress induced growth inhibitor family member 2 | -1.603 |
| 38454288  | P4HA3    | prolyl 4-hydroxylase subunit alpha 3                      | -1.585 |
| 149052692 | N/A      | N/A                                                       | -1.576 |
| 564322532 | FTSJ1    | FtsJ RNA methyltransferase homolog 1                      | -1.564 |
| 559098430 | ARMC3    | armadillo repeat containing 3                             | -1.556 |
| 564312627 | ZFP62    | ZFP62 zinc finger protein                                 | -1.556 |
| 281332082 | THBS2    | thrombospondin 2                                          | -1.536 |
| 149064672 | ARHGEF26 | Rho guanine nucleotide exchange factor 26                 | -1.525 |
| 676272056 | N/A      | N/A                                                       | -1.497 |
| 672028646 | N/A      | N/A                                                       | -1.490 |
| 564341299 | N/A      | N/A                                                       | -1.458 |
| 9910536   | RNASE4   | ribonuclease A family member 4                            | -1.456 |
| 20301982  | UNC13D   | unc-13 homolog D                                          | -1.449 |
| 31542125  | ALOX15   | arachidonate 15-lipoxygenase                              | -1.437 |
| 149056134 | Zfp17    | zinc finger protein 585B                                  | -1.433 |
| 564310412 | DOPEY1   | dopey family member 1                                     | -1.429 |
| 392339263 | PKP4     | plakophilin 4                                             | -1.429 |
| 187957728 | FANCM    | Fanconi anemia complementation group M                    | -1.425 |
| 672086880 | N/A      | N/A                                                       | -1.424 |

|           |          |                                                                    |        |
|-----------|----------|--------------------------------------------------------------------|--------|
| 755566692 | HUWE1    | HECT, UBA and WWE domain containing 1, E3 ubiquitin protein ligase | -1.410 |
| 672028287 | Kat6b    | K(lysine) acetyltransferase 6B                                     | -1.409 |
| 564297736 | N/A      | N/A                                                                | -1.401 |
| 672053062 | FKBP15   | FK506 binding protein 15                                           | -1.398 |
| 672063750 | N/A      | N/A                                                                | -1.394 |
| 480306394 | Mcpt4    | mast cell protease 4                                               | -1.391 |
| 564323057 | ARMCX4   | armadillo repeat containing, X-linked 4                            | -1.388 |
| 564315207 | TMEM270  | transmembrane protein 270                                          | -1.386 |
| 674082951 | N/A      | N/A                                                                | -1.383 |
| 568927637 | ADAMTSL1 | ADAMTS like 1                                                      | -1.379 |
| 227116255 | P2RX6    | purinergic receptor P2X 6                                          | -1.379 |
| 149043399 | TAPBP    | TAP binding protein                                                | -1.370 |
| 564393142 | WDR36    | WD repeat domain 36                                                | -1.364 |
| 149056609 | DEDD2    | death effector domain containing 2                                 | -1.351 |
| 470605072 | N/A      | N/A                                                                | -1.350 |
| 564300505 | SH3D19   | SH3 domain containing 19                                           | -1.349 |
| 564388219 | ARHGAP22 | Rho GTPase activating protein 22                                   | -1.344 |
| 40254742  | NCF1     | neutrophil cytosolic factor 1                                      | -1.338 |
| 392334596 | RSPH3    | radial spoke head 3 homolog                                        | -1.337 |
| 6981642   | TCP1     | t-complex 1                                                        | -1.328 |
| 672061705 | KMT2A    | lysine methyltransferase 2A                                        | -1.326 |
| 672023936 | N/A      | N/A                                                                | -1.325 |
| 293358436 | FOXP2    | forkhead box P2                                                    | -1.322 |
| 149043385 | N/A      | N/A                                                                | -1.322 |
| 392340768 | DISP3    | dispatched RND transporter family member 3                         | -1.320 |
| 77404174  | HLA-A    | major histocompatibility complex, class I, A                       | -1.314 |
| 12621098  | EPHX2    | epoxide hydrolase 2                                                | -1.311 |
| 62656582  | KIAA0100 | KIAA0100                                                           | -1.300 |
| 564400341 | N/A      | N/A                                                                | -1.293 |
| 672071353 | N/A      | N/A                                                                | -1.284 |
| 564329920 | EMSY     | EMSY, BRCA2 interacting transcriptional repressor                  | -1.275 |
| 149050972 | N/A      | N/A                                                                | -1.272 |
| 672063675 | N/A      | N/A                                                                | -1.266 |
| 157787062 | GRID2IP  | Grid2 interacting protein                                          | -1.260 |
| 564311918 | C2orf72  | chromosome 2 open reading frame 72                                 | -1.253 |
| 672088045 | N/A      | N/A                                                                | -1.253 |
| 149020413 | Zfp599   | zinc finger protein 599                                            | -1.250 |
| 149044121 | N/A      | N/A                                                                | -1.243 |

|           |                      |                                                                |        |
|-----------|----------------------|----------------------------------------------------------------|--------|
| 197333844 | LLPH                 | LLP homolog, long-term synaptic facilitation                   | -1.241 |
| 564312009 | COL6A3               | collagen type VI alpha 3 chain                                 | -1.239 |
| 18266694  | PDE11A               | phosphodiesterase 11A                                          | -1.239 |
| 564311681 | PIKFYVE              | phosphoinositide kinase, FYVE-type zinc finger containing      | -1.237 |
| 281306821 | HEY2                 | hes related family bHLH transcription factor with YRPW motif 2 | -1.232 |
| 293346251 | TMEM62               | transmembrane protein 62                                       | -1.225 |
| 672046728 | N/A                  | N/A                                                            | -1.224 |
| 61889085  | GADD45A              | growth arrest and DNA damage inducible alpha                   | -1.219 |
| 568964944 | EPB41L2              | erythrocyte membrane protein band 4.1 like 2                   | -1.215 |
| 293344867 | N/A                  | N/A                                                            | -1.209 |
| 410515422 | NTN1                 | netrin 1                                                       | -1.204 |
| 109501553 | METTL17              | methyltransferase like 17                                      | -1.202 |
| 149041058 | RCOR3                | REST corepressor 3                                             | -1.198 |
| 149018406 | ALS2CL               | ALS2 C-terminal like                                           | -1.194 |
| 293349725 | AMER3                | APC membrane recruitment protein 3                             | -1.190 |
| 166235131 | MTCL1                | microtubule crosslinking factor 1                              | -1.187 |
| 564314685 | EIF4G1               | eukaryotic translation initiation factor 4 gamma 1             | -1.186 |
| 66730305  | ERICH2               | glutamate rich 2                                               | -1.181 |
| 293341054 | IQCE                 | IQ motif containing E                                          | -1.180 |
| 672016875 | LOC103690320         | FERM and PDZ domain-containing protein 3                       | -1.179 |
| 149048115 | KHDC4                | KH domain containing 4, pre-mRNA splicing factor               | -1.168 |
| 564345430 | LOC100910079         | actin-related protein 3B-like                                  | -1.150 |
| 157822457 | SYNC                 | syncoilin, intermediate filament protein                       | -1.146 |
| 157821431 | GAL3ST1              | galactose-3-O-sulfotransferase 1                               | -1.141 |
| 157818989 | LRRC71               | leucine rich repeat containing 71                              | -1.141 |
| 672042306 | N/A                  | N/A                                                            | -1.134 |
| 32996721  | NDUFA10              | NADH:ubiquinone oxidoreductase subunit A10                     | -1.133 |
| 672076690 | N/A                  | N/A                                                            | -1.133 |
| 392334475 | RGD1560020_predicted | similar to Myb proto-oncogene protein (C-myb) (predicted)      | -1.127 |
| 672012705 | SYNE1                | spectrin repeat containing nuclear envelope protein 1          | -1.120 |
| 291463305 | SHISA9               | shisa family member 9                                          | -1.118 |
| 564373460 | SLFN13               | schlafen family member 13                                      | -1.109 |
| 672047353 | RALGAPA2             | Ral GTPase activating protein catalytic alpha subunit 2        | -1.107 |



|           |         |                                                                      |        |
|-----------|---------|----------------------------------------------------------------------|--------|
| 164448680 | HBB     | hemoglobin subunit beta                                              | -1.101 |
| 564305252 | FBXO10  | F-box protein 10                                                     | -1.097 |
| 71361637  | STRA6   | stimulated by retinoic acid 6                                        | -1.096 |
| 564310624 | CDHR4   | cadherin related family member 4                                     | -1.089 |
| 66730382  | TRNT1   | tRNA nucleotidyl transferase 1                                       | -1.089 |
| 2231145   | N/A     | N/A                                                                  | -1.075 |
| 392332346 | RUBCN   | RUN and cysteine rich domain containing beclin 1 interacting protein | -1.067 |
| 8393123   | CHRM5   | cholinergic receptor muscarinic 5                                    | -1.066 |
| 157823801 | SLC50A1 | solute carrier family 50 member 1                                    | -1.064 |
| 672076581 | N/A     | N/A                                                                  | -1.062 |
| 589937133 | N/A     | N/A                                                                  | -1.060 |
| 564355419 | Nbas    | neuroblastoma amplified sequence                                     | -1.053 |
| 293344867 | N/A     | N/A                                                                  | -1.050 |
| 674048263 | N/A     | N/A                                                                  | -1.037 |
| 392339456 | CKAP2L  | cytoskeleton associated protein 2 like                               | -1.026 |
| 157820739 | GPR68   | G protein-coupled receptor 68                                        | -1.024 |
| 300797715 | NDST4   | N-deacetylase and N-sulfotransferase 4                               | -1.016 |
| 564316927 | FRYL    | FRY like transcription coactivator                                   | -1.010 |
| 657940868 | PALLD   | palladin, cytoskeletal associated protein                            | -1.009 |
| 564297387 | Zfp658  | zinc finger protein 658                                              | -1.000 |
| 149047375 | CCDC96  | coiled-coil domain containing 96                                     | -0.993 |
| 564301284 | Ttf1    | transcription termination factor, RNA polymerase I                   | -0.993 |
| 470602254 | N/A     | N/A                                                                  | -0.990 |
| 392331598 | MPV17L  | MPV17 mitochondrial inner membrane protein like                      | -0.987 |
| 392331598 | MPV17L  | MPV17 mitochondrial inner membrane protein like                      | -0.987 |
| 149050030 | MTRF1   | mitochondrial translation release factor 1                           | -0.977 |
| 672089449 | N/A     | N/A                                                                  | -0.973 |
| 818015    | HBB     | hemoglobin subunit beta                                              | -0.970 |
| 194440693 | Maml2   | mastermind like transcriptional coactivator 2                        | -0.967 |
| 672028919 | N/A     | N/A                                                                  | -0.964 |
| 685536628 | N/A     | N/A                                                                  | -0.961 |
| 672018099 | N/A     | N/A                                                                  | -0.953 |
| 38322763  | WNT2    | Wnt family member 2                                                  | -0.943 |
| 569009290 | TENM1   | teneurin transmembrane protein 1                                     | -0.942 |
| 672088045 | N/A     | N/A                                                                  | -0.942 |
| 17105368  | KLF9    | Kruppel like factor 9                                                | -0.940 |

|           |                             |                                                                      |        |
|-----------|-----------------------------|----------------------------------------------------------------------|--------|
| 149052383 | TRIM7                       | tripartite motif containing 7                                        | -0.939 |
| 293349179 | CBL                         | Cbl proto-oncogene                                                   | -0.938 |
| 209870105 | GPR37L1                     | G protein-coupled receptor 37 like 1                                 | -0.938 |
| 56676356  | SLC10A4                     | solute carrier family 10 member 4                                    | -0.938 |
| 564296997 | ZNF45                       | zinc finger protein 45                                               | -0.931 |
| 672028986 | N/A                         | N/A                                                                  | -0.931 |
| 149066285 | PHF20L1                     | PHD finger protein 20 like 1                                         | -0.930 |
| 61097937  | VEGFB                       | vascular endothelial growth factor B                                 | -0.926 |
| 281332166 | GPR158                      | G protein-coupled receptor 158                                       | -0.922 |
| 564313508 | BPTF                        | bromodomain PHD finger transcription factor                          | -0.921 |
| 564348231 | RPUSD3                      | RNA pseudouridylate synthase domain containing 3                     | -0.918 |
| 293340128 | MIEF2                       | mitochondrial elongation factor 2                                    | -0.914 |
| 148687007 | CEP128                      | centrosomal protein 128                                              | -0.912 |
| 564301352 | PRRC2B                      | proline rich coiled-coil 2B                                          | -0.910 |
| 293346666 | RBMXL1                      | RNA binding motif protein, X-linked like 1                           | -0.907 |
| 197333844 | LLPH                        | LLP homolog, long-term synaptic facilitation                         | -0.904 |
| 187282382 | RGD1563441                  | similar to RIKEN cDNA A030009H04                                     | -0.904 |
| 564342470 | MGA                         | MGA, MAX dimerization protein                                        | -0.903 |
| 56119147  | ARRDC3                      | arrestin domain containing 3                                         | -0.898 |
| 564318923 | WDR17                       | WD repeat domain 17                                                  | -0.898 |
| 149054281 | CNTNAP1                     | contactin associated protein 1                                       | -0.888 |
| 307548437 | NYAP2                       | neuronal tyrosine-phosphorylated phosphoinositide-3-kinase adaptor 2 | -0.887 |
| 149046828 | N/A                         | N/A                                                                  | -0.885 |
| 149051391 | N/A                         | N/A                                                                  | -0.883 |
| 209862917 | FCGR2A                      | Fc fragment of IgG receptor IIa                                      | -0.882 |
| 148702528 | OTOP3                       | otopetirin 3                                                         | -0.875 |
| 564352536 | Szt2                        | SZT2, KICSTOR complex subunit                                        | -0.868 |
| 61889110  | OSTF1                       | osteoclast stimulating factor 1                                      | -0.865 |
| 564329916 | EMSY                        | EMSY, BRCA2 interacting transcriptional repressor                    | -0.864 |
| 564324344 | LOC363306 (includes others) | hypothetical protein LOC363306                                       | -0.864 |
| 72255523  | DNALI1                      | dynein axonemal light intermediate chain 1                           | -0.862 |
| 884945546 | N/A                         | N/A                                                                  | -0.862 |
| 672052120 | RBM12B                      | RNA binding motif protein 12B                                        | -0.861 |
| 83320101  | AFG1L                       | AFG1 like ATPase                                                     | -0.857 |
| 30027645  | GHR                         | growth hormone receptor                                              | -0.857 |
| 564342055 | Apip                        | APAF1 interacting protein                                            | -0.853 |

|           |          |                                                           |        |
|-----------|----------|-----------------------------------------------------------|--------|
| 564396366 | PCNX2    | pecanex homolog 2                                         | -0.852 |
| 148747412 | CBWD1    | COBW domain containing 1                                  | -0.850 |
| 148704596 | L3HYPDH  | trans-L-3-hydroxyproline dehydratase                      | -0.846 |
| 157817364 | Fbx122   | F-box and leucine-rich repeat protein 22                  | -0.842 |
| 564334233 | CFAP43   | cilia and flagella associated protein 43                  | -0.841 |
| 19924079  | DNASE2   | deoxyribonuclease 2, lysosomal                            | -0.835 |
| 672069802 | C1QTNF1  | C1q and TNF related 1                                     | -0.833 |
| 672016642 | GAPVD1   | GTPase activating protein and VPS9 domains 1              | -0.832 |
| 309243084 | FUT4     | fucosyltransferase 4                                      | -0.831 |
| 564311685 | PIKFYVE  | phosphoinositide kinase, FYVE-type zinc finger containing | -0.826 |
| 149018731 | TMEM108  | transmembrane protein 108                                 | -0.826 |
| 149031998 | ACVRL1   | activin A receptor like type 1                            | -0.823 |
| 293341722 | N/A      | N/A                                                       | -0.823 |
| 672087474 | REPS2    | RALBP1 associated Eps domain containing 2                 | -0.818 |
| 672087474 | REPS2    | RALBP1 associated Eps domain containing 2                 | -0.818 |
| 149042171 | RTL5     | retrotransposon Gag like 5                                | -0.818 |
| 564336411 | POSTN    | periostin                                                 | -0.811 |
| 531999911 | N/A      | N/A                                                       | -0.806 |
| 725571770 | N/A      | N/A                                                       | -0.803 |
| 73487332  | C1orf115 | chromosome 1 open reading frame 115                       | -0.799 |
| 46485412  | ABCA7    | ATP binding cassette subfamily A member 7                 | -0.798 |
| 564309742 | IGSF9B   | immunoglobulin superfamily member 9B                      | -0.796 |
| 564317722 | N/A      | N/A                                                       | -0.792 |
| 564313508 | BPTF     | bromodomain PHD finger transcription factor               | -0.791 |
| 672078695 | N/A      | N/A                                                       | -0.786 |
| 354475081 | N/A      | N/A                                                       | -0.786 |
| 564313510 | BPTF     | bromodomain PHD finger transcription factor               | -0.785 |
| 157820751 | FAM241A  | family with sequence similarity 241 member A              | -0.771 |
| 987938912 | N/A      | N/A                                                       | -0.768 |
| 157823151 | DLEU7    | deleted in lymphocytic leukemia, 7                        | -0.761 |
| 568961599 | VPS13C   | vacuolar protein sorting 13 homolog C                     | -0.758 |
| 157823283 | Coch     | cochlin                                                   | -0.757 |
| 672012431 | SASH1    | SAM and SH3 domain containing 1                           | -0.756 |
| 672053541 | N/A      | N/A                                                       | -0.756 |
| 157820141 | KLHDC1   | kelch domain containing 1                                 | -0.755 |
| 880855761 | N/A      | N/A                                                       | -0.755 |
| 293351987 | UBE2O    | ubiquitin conjugating enzyme E2 O                         | -0.752 |
| 13540697  | NOV      | nephroblastoma overexpressed                              | -0.751 |
| 392340959 | ITSN2    | intersectin 2                                             | -0.750 |

|           |                             |                                                                 |        |
|-----------|-----------------------------|-----------------------------------------------------------------|--------|
| 157819949 | ITGA4                       | integrin subunit alpha 4                                        | -0.748 |
| 672026534 | N/A                         | N/A                                                             | -0.746 |
| 293342292 | FAM208A                     | family with sequence similarity 208 member A                    | -0.742 |
| 392351290 | DNAH9                       | dynein axonemal heavy chain 9                                   | -0.741 |
| 564378166 | PAN3                        | PAN3 poly(A) specific ribonuclease subunit                      | -0.740 |
| 675706185 | N/A                         | N/A                                                             | -0.739 |
| 157824208 | NTNG1                       | netrin G1                                                       | -0.737 |
| 672022659 | N/A                         | N/A                                                             | -0.737 |
| 281182643 | ALK                         | ALK receptor tyrosine kinase                                    | -0.734 |
| 13592079  | S100A10                     | S100 calcium binding protein A10                                | -0.733 |
| 672066075 | COL6A3                      | collagen type VI alpha 3 chain                                  | -0.732 |
| 149057816 | N/A                         | N/A                                                             | -0.730 |
| 513022818 | N/A                         | N/A                                                             | -0.724 |
| 672023724 | PRICKLE4                    | prickle planar cell polarity protein 4                          | -0.721 |
| 157786678 | Cisd3                       | CDGSH iron sulfur domain 3                                      | -0.719 |
| 212549544 | C15orf39                    | chromosome 15 open reading frame 39                             | -0.716 |
| 564366772 | MGC116197 (includes others) | similar to RIKEN cDNA 1700001E04                                | -0.715 |
| 26024221  | PRSS12                      | protease, serine 12                                             | -0.708 |
| 564340633 | OLFML2A                     | olfactomedin like 2A                                            | -0.707 |
| 148664561 | DTNA                        | dystrobrevin alpha                                              | -0.706 |
| 672044124 | N/A                         | N/A                                                             | -0.706 |
| 9506475   | CDK1                        | cyclin dependent kinase 1                                       | -0.702 |
| 564309732 | IGSF9B                      | immunoglobulin superfamily member 9B                            | -0.702 |
| 803119291 | N/A                         | N/A                                                             | -0.700 |
| 149053909 | COL1A1                      | collagen type I alpha 1 chain                                   | -0.697 |
| 672058561 | N/A                         | N/A                                                             | -0.697 |
| 537241732 | N/A                         | N/A                                                             | -0.694 |
| 149034092 | Grid1                       | glutamate ionotropic receptor delta type subunit 1              | -0.693 |
| 392341692 | FMNL3                       | formin like 3                                                   | -0.689 |
| 672017085 | N/A                         | N/A                                                             | -0.684 |
| 157822891 | ADCK2                       | aarF domain containing kinase 2                                 | -0.683 |
| 149062990 | CUX1                        | cut like homeobox 1                                             | -0.682 |
| 197927137 | WDR63                       | WD repeat domain 63                                             | -0.679 |
| 154937382 | MYL9                        | myosin light chain 9                                            | -0.678 |
| 68534736  | ERAP1                       | endoplasmic reticulum aminopeptidase 1                          | -0.676 |
| 157786914 | OGFOD2                      | 2-oxoglutarate and iron dependent oxygenase domain containing 2 | -0.675 |
| 672014740 | MAMDC2                      | MAM domain containing 2                                         | -0.671 |

|           |              |                                                         |        |
|-----------|--------------|---------------------------------------------------------|--------|
| 725595815 | N/A          | N/A                                                     | -0.671 |
| 155369293 | AEBP1        | AE binding protein 1                                    | -0.668 |
| 672057459 | DGKA         | diacylglycerol kinase alpha                             | -0.664 |
| 19924029  | ADRA2C       | adrenoceptor alpha 2C                                   | -0.663 |
| 148697042 | N/A          | N/A                                                     | -0.658 |
| 564323143 | Gprasp2      | G protein-coupled receptor associated sorting protein 2 | -0.655 |
| 12083595  | GRM4         | glutamate metabotropic receptor 4                       | -0.653 |
| 564300485 | LOC102551095 | uncharacterized LOC102551095                            | -0.652 |
| 154090947 | NPAS3        | neuronal PAS domain protein 3                           | -0.652 |
| 537234259 | N/A          | N/A                                                     | -0.651 |
| 188536090 | FAM241B      | family with sequence similarity 241 member B            | -0.644 |
| 149039154 | COQ4         | coenzyme Q4                                             | -0.642 |
| 74200445  | PNPLA6       | patatin like phospholipase domain containing 6          | -0.642 |
| 157818491 | DUS2         | dihydrouridine synthase 2                               | -0.630 |
| 219275548 | DUSP19       | dual specificity phosphatase 19                         | -0.630 |
| 672070295 | BAHCC1       | BAH domain and coiled-coil containing 1                 | -0.629 |
| 149053793 | TSPOAP1      | TSPO associated protein 1                               | -0.627 |
| 672027054 | N/A          | N/A                                                     | -0.627 |
| 67846096  | MFSD3        | major facilitator superfamily domain containing 3       | -0.626 |
| 198041781 | GLTPD2       | glycolipid transfer protein domain containing 2         | -0.625 |
| 157819765 | OGDHL        | oxoglutarate dehydrogenase like                         | -0.625 |
| 157820695 | MRPL57       | mitochondrial ribosomal protein L57                     | -0.622 |
| 564317714 | Ktn1         | kinectin 1                                              | -0.621 |
| 568950242 | Pgap2        | post-GPI attachment to proteins 2                       | -0.618 |
| 300798165 | ZBTB40       | zinc finger and BTB domain containing 40                | -0.618 |
| 16758130  | WNT4         | Wnt family member 4                                     | -0.615 |
| 402478640 | HTRA3        | HtrA serine peptidase 3                                 | -0.614 |
| 312836782 | MRPS27       | mitochondrial ribosomal protein S27                     | -0.614 |
| 57527919  | GPD1         | glycerol-3-phosphate dehydrogenase 1                    | -0.612 |
| 568983685 | TMEM161B     | transmembrane protein 161B                              | -0.612 |
| 11560087  | PYGL         | glycogen phosphorylase L                                | -0.610 |
| 148747464 | SCD          | stearoyl-CoA desaturase                                 | -0.610 |
| 564315812 | NAV1         | neuron navigator 1                                      | -0.607 |
| 564379463 | N/A          | N/A                                                     | -0.606 |
| 157823299 | CSGALNACT1   | chondroitin sulfate N-acetylgalactosaminyltransferase 1 | -0.605 |
| 672029180 | CCSER2       | coiled-coil serine rich protein 2                       | -0.603 |
| 61556857  | TM7SF2       | transmembrane 7 superfamily member 2                    | -0.602 |

|           |          |                                                                |        |
|-----------|----------|----------------------------------------------------------------|--------|
| 672015368 | MAST4    | microtubule associated serine/threonine kinase family member 4 | -0.600 |
| 237757336 | OLIG1    | oligodendrocyte transcription factor 1                         | -0.599 |
| 564299864 | N/A      | N/A                                                            | -0.599 |
| 672043209 | RUSC1    | RUN and SH3 domain containing 1                                | -0.597 |
| 157817033 | TJAP1    | tight junction associated protein 1                            | -0.597 |
| 47059110  | DXO      | decapping exoribonuclease                                      | -0.596 |
| 672066409 | N/A      | N/A                                                            | -0.596 |
| 62079069  | RSRC1    | arginine and serine rich coiled-coil 1                         | -0.595 |
| 157819033 | RNASET2  | ribonuclease T2                                                | -0.594 |
| 672026129 | LRCH3    | leucine rich repeats and calponin homology domain containing 3 | -0.593 |
| 672057384 | N/A      | N/A                                                            | -0.593 |
| 402745263 | COL11A1  | collagen type XI alpha 1 chain                                 | -0.592 |
| 157951643 | ACTN2    | actinin alpha 2                                                | -0.590 |
| 110347493 | PCDHA9   | protocadherin alpha 9                                          | -0.587 |
| 157822759 | PARP2    | poly(ADP-ribose) polymerase 2                                  | -0.585 |
| 149034959 | ZNF12    | zinc finger protein 12                                         | -0.585 |
| 14269568  | LXN      | latexin                                                        | -0.584 |
| 157822577 | MAN1C1   | mannosidase alpha class 1C member 1                            | -0.584 |
| 564314671 | VPS8     | VPS8, CORVET complex subunit                                   | -0.584 |
| 565655    | ZIC1     | Zic family member 1                                            | -0.583 |
| 392343448 | KLHL13   | kelch like family member 13                                    | -0.582 |
| 1478205   | PPP1R14B | protein phosphatase 1 regulatory inhibitor subunit 14B         | -0.582 |
| 586551369 | N/A      | N/A                                                            | -0.580 |
| 672035060 | CIC      | capicua transcriptional repressor                              | -0.579 |
| 197386131 | Acad10   | acyl-CoA dehydrogenase family, member 10                       | -0.578 |
| 564307839 | JAG2     | jagged 2                                                       | -0.573 |
| 157823545 | WDR54    | WD repeat domain 54                                            | -0.573 |
| 16758622  | IFT172   | intraflagellar transport 172                                   | -0.568 |
| 672035395 | DMWD     | DM1 locus, WD repeat containing                                | -0.566 |
| 984107618 | N/A      | N/A                                                            | -0.565 |
| 157821925 | IFT88    | intraflagellar transport 88                                    | -0.563 |
| 109470195 | TNKS1BP1 | tankyrase 1 binding protein 1                                  | -0.562 |
| 431916930 | N/A      | N/A                                                            | -0.561 |
| 149046941 | BEND3    | BEN domain containing 3                                        | -0.560 |
| 672070787 | NSUN3    | NOP2/Sun RNA methyltransferase family member 3                 | -0.560 |
| 148701441 | N/A      | N/A                                                            | -0.560 |

|           |          |                                                         |        |
|-----------|----------|---------------------------------------------------------|--------|
| 672015904 | TMEM131L | transmembrane 131 like                                  | -0.559 |
| 564395350 | N/A      | N/A                                                     | -0.559 |
| 564394999 | CLGN     | calmegin                                                | -0.558 |
| 675649807 | N/A      | N/A                                                     | -0.555 |
| 564310904 | N/A      | N/A                                                     | -0.553 |
| 672048447 | CABLES2  | Cdk5 and Abl enzyme substrate 2                         | -0.552 |
| 564345556 | CROT     | carnitine O-octanoyltransferase                         | -0.551 |
| 197927123 | LYRM7    | LYR motif containing 7                                  | -0.549 |
| 558611343 | MCM3     | minichromosome maintenance complex component 3          | -0.549 |
| 564308822 | SLC45A4  | solute carrier family 45 member 4                       | -0.546 |
| 50657355  | TOP1MT   | DNA topoisomerase I mitochondrial                       | -0.544 |
| 568972691 | STAT5B   | signal transducer and activator of transcription 5B     | -0.543 |
| 109497496 | MMAB     | methylmalonic aciduria (cobalamin deficiency) cblB type | -0.542 |
| 148674017 | NRSN2    | neurensin 2                                             | -0.542 |
| 48428501  | SYNPO    | synaptopodin                                            | -0.542 |
| 13162329  | PIGM     | phosphatidylinositol glycan anchor biosynthesis class M | -0.541 |
| 149061352 | ADAM12   | ADAM metallopeptidase domain 12                         | -0.529 |
| 395759219 | AQP4     | aquaporin 4                                             | -0.525 |
| 6978737   | CYP1B1   | cytochrome P450 family 1 subfamily B member 1           | -0.524 |
| 149048774 | Spry1    | sprouty RTK signaling antagonist 1                      | -0.522 |
| 564338026 | BCL9     | B cell CLL/lymphoma 9                                   | -0.517 |
| 149016584 | ZNF606   | zinc finger protein 606                                 | -0.517 |
| 195976802 | DNLZ     | DNL-type zinc finger                                    | -0.516 |
| 149035030 | MAFK     | MAF bZIP transcription factor K                         | -0.515 |
| 119574218 | COL23A1  | collagen type XXIII alpha 1 chain                       | -0.512 |
| 9506405   | ARPC1B   | actin related protein 2/3 complex subunit 1B            | -0.511 |
| 293347888 | SRBD1    | S1 RNA binding domain 1                                 | -0.510 |
| 148356229 | CCND1    | cyclin D1                                               | -0.506 |
| 564310188 | IGDCC4   | immunoglobulin superfamily DCC subclass member 4        | -0.504 |
| 281371499 | COL5A2   | collagen type V alpha 2 chain                           | -0.503 |
| 564313842 | SLC38A10 | solute carrier family 38 member 10                      | -0.503 |
| 564302924 | TSHZ2    | teashirt zinc finger homeobox 2                         | -0.503 |
| 672022667 | ARHGAP32 | Rho GTPase activating protein 32                        | -0.502 |
| 25742686  | ELOVL6   | ELOVL fatty acid elongase 6                             | -0.496 |

|           |          |                                                    |        |
|-----------|----------|----------------------------------------------------|--------|
| 157818909 | Zim1     | zinc finger, imprinted 1                           | -0.495 |
| 672038342 | XYLT1    | xylosyltransferase 1                               | -0.494 |
| 392332017 | ASPSCR1  | ASPSCR1, UBX domain containing tether for SLC2A4   | -0.493 |
| 62543507  | CIB2     | calcium and integrin binding family member 2       | -0.493 |
| 62647202  | KRBA1    | KRAB-A domain containing 1                         | -0.492 |
| 984126115 | N/A      | N/A                                                | -0.491 |
| 12849161  | NRARP    | NOTCH regulated ankyrin repeat protein             | -0.489 |
| 31560385  | RPL21    | ribosomal protein L21                              | -0.482 |
| 70608094  | SLC10A5  | solute carrier family 10 member 5                  | -0.481 |
| 564367862 | Dst      | dystonin                                           | -0.480 |
| 260271475 | CCHCR1   | coiled-coil alpha-helical rod protein 1            | -0.478 |
| 293340128 | MIEF2    | mitochondrial elongation factor 2                  | -0.477 |
| 564315753 | N/A      | N/A                                                | -0.476 |
| 19424260  | CDC25B   | cell division cycle 25B                            | -0.470 |
| 149048674 | PEX5L    | peroxisomal biogenesis factor 5 like               | -0.468 |
| 148674444 | DBNDD2   | dysbindin domain containing 2                      | -0.466 |
| 115392004 | GPR17    | G protein-coupled receptor 17                      | -0.466 |
| 202070751 | RFTN1    | raftlin, lipid raft linker 1                       | -0.465 |
| 6754024   | GNG4     | G protein subunit gamma 4                          | -0.463 |
| 564320452 | SAP130   | Sin3A associated protein 130                       | -0.462 |
| 694978694 | N/A      | N/A                                                | -0.462 |
| 564324736 | L3MBTL3  | L3MBTL3, histone methyl-lysine binding protein     | -0.461 |
| 215490074 | SAP18    | Sin3A associated protein 18                        | -0.461 |
| 157823259 | TMEM229A | transmembrane protein 229A                         | -0.458 |
| 51948480  | MTIF2    | mitochondrial translational initiation factor 2    | -0.457 |
| 564302105 | ZNF770   | zinc finger protein 770                            | -0.457 |
| 392331978 | CDR2L    | cerebellar degeneration related protein 2 like     | -0.456 |
| 310703673 | GRIN3A   | glutamate ionotropic receptor NMDA type subunit 3A | -0.453 |
| 41056215  | XRCC5    | X-ray repair cross complementing 5                 | -0.452 |
| 392353178 | SEL1L3   | SEL1L family member 3                              | -0.451 |
| 672080674 | Myo16    | myosin XVI                                         | -0.450 |
| 674054416 | N/A      | N/A                                                | -0.449 |
| 82654188  | KLF11    | Kruppel like factor 11                             | -0.448 |
| 564311658 | N/A      | N/A                                                | -0.447 |
| 13592057  | RPL18    | ribosomal protein L18                              | -0.446 |
| 57527498  | KLC4     | kinesin light chain 4                              | -0.445 |
| 78126167  | SLC1A2   | solute carrier family 1 member 2                   | -0.445 |



|           |                     |                                                              |        |
|-----------|---------------------|--------------------------------------------------------------|--------|
| 157820211 | ABHD3               | abhydrolase domain containing 3                              | -0.444 |
| 392349170 | ZFP36L2             | ZFP36 ring finger protein like 2                             | -0.444 |
| 672018552 | N/A                 | N/A                                                          | -0.442 |
| 148692356 | ARHGEF1             | Rho guanine nucleotide exchange factor 1                     | -0.441 |
| 564345274 | FASTK               | Fas activated serine/threonine kinase                        | -0.440 |
| 160406706 | SH3GL3              | SH3 domain containing GRB2 like 3, endophilin A3             | -0.440 |
| 568926543 | KIAA0368            | KIAA0368                                                     | -0.437 |
| 586908220 | ARHGAP44            | Rho GTPase activating protein 44                             | -0.434 |
| 51854227  | GSN                 | gelsolin                                                     | -0.431 |
| 635015168 | N/A                 | N/A                                                          | -0.431 |
| 564386622 | AMER2               | APC membrane recruitment protein 2                           | -0.430 |
| 672080026 | N/A                 | N/A                                                          | -0.430 |
| 524964924 | N/A                 | N/A                                                          | -0.427 |
| 296470851 | PABPC1L2A           | poly(A) binding protein cytoplasmic 1 like 2A                | -0.426 |
| 149054848 | FOXJ1               | forkhead box J1                                              | -0.425 |
| 336285191 | ZFPM1               | zinc finger protein, FOG family member 1                     | -0.424 |
| 157821511 | SDR39U1             | short chain dehydrogenase/reductase family 39U member 1      | -0.423 |
| 148706671 | RHOQ                | ras homolog family member Q                                  | -0.422 |
| 564374356 | ADAM11              | ADAM metallopeptidase domain 11                              | -0.421 |
| 62078551  | GNB4                | G protein subunit beta 4                                     | -0.421 |
| 564357619 | ITGB8               | integrin subunit beta 8                                      | -0.421 |
| 18087805  | RPS2                | ribosomal protein S2                                         | -0.421 |
| 672082323 | N/A                 | N/A                                                          | -0.421 |
| 199562000 | USP40               | ubiquitin specific peptidase 40                              | -0.420 |
| 725568549 | N/A                 | N/A                                                          | -0.419 |
| 564304730 | N/A                 | N/A                                                          | -0.418 |
| 293348823 | SUN2                | Sad1 and UNC84 domain containing 2                           | -0.416 |
| 157823399 | COG4                | component of oligomeric golgi complex 4                      | -0.415 |
| 281604125 | Fam50a/LOC100910130 | family with sequence similarity 50, member A                 | -0.412 |
| 929981595 | NPHP1               | nephrocystin 1                                               | -0.412 |
| 167900441 | FO XK1              | forkhead box K1                                              | -0.411 |
| 293342200 | DGKH                | diacylglycerol kinase eta                                    | -0.410 |
| 189011647 | RNF139              | ring finger protein 139                                      | -0.410 |
| 148747268 | Sik1                | salt inducible kinase 1                                      | -0.408 |
| 157818005 | HPS3                | HPS3, biogenesis of lysosomal organelles complex 2 subunit 1 | -0.405 |
| 157818133 | KLHL29              | kelch like family member 29                                  | -0.404 |

|           |              |                                                                         |        |
|-----------|--------------|-------------------------------------------------------------------------|--------|
| 807677    | N/A          | N/A                                                                     | -0.404 |
| 109480433 | GNPTAB       | N-acetylglucosamine-1-phosphate transferase alpha and beta subunits     | -0.403 |
| 38454238  | Rab15        | RAB15, member RAS oncogene family                                       | -0.402 |
| 13592117  | KLF10        | Kruppel like factor 10                                                  | -0.400 |
| 149028840 | N/A          | N/A                                                                     | -0.400 |
| 451172073 | CHRM3        | cholinergic receptor muscarinic 3                                       | -0.399 |
| 58865380  | STAT2        | signal transducer and activator of transcription 2                      | -0.399 |
| 958720315 | N/A          | N/A                                                                     | -0.399 |
| 672061813 | ACSBG1       | acyl-CoA synthetase bubblegum family member 1                           | -0.397 |
| 11693172  | CALR         | calreticulin                                                            | -0.396 |
| 114052238 | FIG4         | FIG4 phosphoinositide 5-phosphatase                                     | -0.396 |
| 148703340 | SERTM1       | serine rich and transmembrane domain containing 1                       | -0.395 |
| 198386343 | TRPS1        | transcriptional repressor GATA binding 1                                | -0.395 |
| 672084347 | N/A          | N/A                                                                     | -0.395 |
| 56605636  | TMEM254      | transmembrane protein 254                                               | -0.394 |
| 672089580 | LOC103694865 | TATA-binding protein-associated factor 2N-like                          | -0.389 |
| 564375702 | N/A          | N/A                                                                     | -0.389 |
| 149034469 | GNG7         | G protein subunit gamma 7                                               | -0.388 |
| 285026497 | ICAM5        | intercellular adhesion molecule 5                                       | -0.386 |
| 524932722 | N/A          | N/A                                                                     | -0.386 |
| 731271938 | N/A          | N/A                                                                     | -0.386 |
| 16758502  | HCN3         | hyperpolarization activated cyclic nucleotide gated potassium channel 3 | -0.384 |
| 149064803 | NHLRC3       | NHL repeat containing 3                                                 | -0.384 |
| 399220341 | SLC2A13      | solute carrier family 2 member 13                                       | -0.384 |
| 205294    | ME1          | malic enzyme 1                                                          | -0.382 |
| 149066394 | SAMD12       | sterile alpha motif domain containing 12                                | -0.381 |
| 672033256 | LOC100912904 | disks large homolog 5-like                                              | -0.380 |
| 171846640 | FBLN1        | fibulin 1                                                               | -0.379 |
| 157786892 | POP7         | POP7 homolog, ribonuclease P/MRP subunit                                | -0.378 |
| 157819227 | PRPF31       | pre-mRNA processing factor 31                                           | -0.377 |
| 55742862  | PLIN2        | perilipin 2                                                             | -0.375 |
| 655851627 | N/A          | N/A                                                                     | -0.374 |
| 672032219 | REPS2        | RALBP1 associated Eps domain containing 2                               | -0.373 |
| 78486556  | C16orf58     | chromosome 16 open reading frame 58                                     | -0.372 |

|           |          |                                                                                |        |
|-----------|----------|--------------------------------------------------------------------------------|--------|
| 119624653 | TMEM63B  | transmembrane protein 63B                                                      | -0.372 |
| 58865418  | SUGP1    | SURP and G-patch domain containing 1                                           | -0.371 |
| 187282043 | TMEM179  | transmembrane protein 179                                                      | -0.371 |
| 217416396 | NEURL1B  | neuralized E3 ubiquitin protein ligase 1B                                      | -0.370 |
| 672060362 | ELFN2    | extracellular leucine rich repeat and fibronectin type III domain containing 2 | -0.369 |
| 56605780  | PMVK     | phosphomevalonate kinase                                                       | -0.368 |
| 625226717 | N/A      | N/A                                                                            | -0.368 |
| 880957181 | N/A      | N/A                                                                            | -0.368 |
| 149066868 | MDM1     | Mdm1 nuclear protein                                                           | -0.367 |
| 13591949  | GATM     | glycine amidinotransferase                                                     | -0.365 |
| 768018507 | MAP1LC3A | microtubule associated protein 1 light chain 3 alpha                           | -0.365 |
| 449784888 | ALDH5A1  | aldehyde dehydrogenase 5 family member A1                                      | -0.363 |
| 298493223 | TMEM132B | transmembrane protein 132B                                                     | -0.363 |
| 589965307 | N/A      | N/A                                                                            | -0.362 |
| 157821975 | ZCCHC24  | zinc finger CCHC-type containing 24                                            | -0.361 |
| 674082488 | N/A      | N/A                                                                            | -0.361 |
| 157817545 | PTX3     | pentraxin 3                                                                    | -0.360 |
| 92110015  | RMND1    | required for meiotic nuclear division 1 homolog                                | -0.360 |
| 61556910  | SNX10    | sorting nexin 10                                                               | -0.359 |
| 564396113 | ZCCHC14  | zinc finger CCHC-type containing 14                                            | -0.359 |
| 33414515  | PXK      | PX domain containing serine/threonine kinase like                              | -0.358 |
| 635039352 | N/A      | N/A                                                                            | -0.356 |
| 77404405  | TRIL     | TLR4 interactor with leucine rich repeats                                      | -0.355 |
| 672074685 | ILDR2    | immunoglobulin like domain containing receptor 2                               | -0.354 |
| 38322759  | MET      | MET proto-oncogene, receptor tyrosine kinase                                   | -0.354 |
| 568968076 | PLXNC1   | plexin C1                                                                      | -0.354 |
| 209915558 | Prrt1    | proline-rich transmembrane protein 1                                           | -0.354 |
| 162287337 | APOE     | apolipoprotein E                                                               | -0.353 |
| 62079143  | YIPF2    | Yip1 domain family member 2                                                    | -0.352 |
| 755566690 | HUWE1    | HECT, UBA and WWE domain containing 1, E3 ubiquitin protein ligase             | -0.351 |
| 11693162  | INSIG1   | insulin induced gene 1                                                         | -0.351 |
| 189491867 | Phykp1   | 5-phosphohydroxy-L-lysine phospho-lyase                                        | -0.351 |
| 9437326   | SLC4A4   | solute carrier family 4 member 4                                               | -0.351 |
| 197927216 | TBC1D5   | TBC1 domain family member 5                                                    | -0.351 |
| 157818161 | AAAS     | aladin WD repeat nucleoporin                                                   | -0.350 |

|           |                             |                                                                                                           |        |
|-----------|-----------------------------|-----------------------------------------------------------------------------------------------------------|--------|
| 308044487 | KIAA0319                    | KIAA0319                                                                                                  | -0.350 |
| 210032365 | HSP90B1                     | heat shock protein 90 beta family member 1                                                                | -0.349 |
| 157822325 | MPDU1                       | mannose-P-dolichol utilization defect 1                                                                   | -0.349 |
| 672044191 | TBCK                        | TBC1 domain containing kinase                                                                             | -0.349 |
| 122065191 | ABAT                        | 4-aminobutyrate aminotransferase                                                                          | -0.348 |
| 157821205 | PAOX                        | polyamine oxidase                                                                                         | -0.348 |
| 451172098 | KCTD1                       | potassium channel tetramerization domain containing 1                                                     | -0.347 |
| 672052705 | FRRS1L                      | ferric chelate reductase 1 like                                                                           | -0.346 |
| 817259544 | N/A                         | N/A                                                                                                       | -0.346 |
| 392342224 | N/A                         | N/A                                                                                                       | -0.346 |
| 148669431 | DNAJC27                     | DnaJ heat shock protein family (Hsp40) member C27                                                         | -0.344 |
| 126012523 | FBXW9                       | F-box and WD repeat domain containing 9                                                                   | -0.344 |
| 148700512 | NRSN1                       | neurensin 1                                                                                               | -0.343 |
| 564332376 | RASGRP2                     | RAS guanyl releasing protein 2                                                                            | -0.343 |
| 148702917 | N/A                         | N/A                                                                                                       | -0.343 |
| 149020546 | COL5A3                      | collagen type V alpha 3 chain                                                                             | -0.341 |
| 564389540 | MGC116197 (includes others) | similar to RIKEN cDNA 1700001E04                                                                          | -0.341 |
| 77046155  | PHYHIP                      | phytanoyl-CoA 2-hydroxylase interacting protein                                                           | -0.341 |
| 11119239  | SYT13                       | synaptotagmin 13                                                                                          | -0.341 |
| 62388885  | YIF1B                       | Yip1 interacting factor homolog B, membrane trafficking protein                                           | -0.341 |
| 562831120 | N/A                         | N/A                                                                                                       | -0.341 |
| 625292335 | N/A                         | N/A                                                                                                       | -0.340 |
| 290677867 | BCAS3                       | BCAS3, microtubule associated cell migration factor                                                       | -0.339 |
| 149063131 | GALNT17                     | polypeptide N-acetylgalactosaminyltransferase 17                                                          | -0.339 |
| 77157795  | MAL2                        | mal, T cell differentiation protein 2 (gene/pseudogene)                                                   | -0.338 |
| 38051964  | TXNDC9                      | thioredoxin domain containing 9                                                                           | -0.338 |
| 157821439 | CPNE5                       | copine 5                                                                                                  | -0.337 |
| 157820489 | NEURL1                      | neutralized E3 ubiquitin protein ligase 1                                                                 | -0.337 |
| 149058577 | Ppfia4                      | protein tyrosine phosphatase, receptor type, f polypeptide (PTPRF), interacting protein (liprin), alpha 4 | -0.334 |
| 472380424 | N/A                         | N/A                                                                                                       | -0.334 |

|           |           |                                                       |        |
|-----------|-----------|-------------------------------------------------------|--------|
| 1334149   | N/A       | N/A                                                   | -0.331 |
| 537237916 | N/A       | N/A                                                   | -0.331 |
| 672014573 | N/A       | N/A                                                   | -0.330 |
| 6981208   | NR3C2     | nuclear receptor subfamily 3 group C member 2         | -0.328 |
| 148681013 | SYT14     | synaptotagmin 14                                      | -0.328 |
| 6981010   | Hba1/Hba2 | hemoglobin, alpha 1                                   | -0.327 |
| 564320789 | SEH1L     | SEH1 like nucleoporin                                 | -0.327 |
| 537193698 | N/A       | N/A                                                   | -0.327 |
| 157822543 | DSCAML1   | DS cell adhesion molecule like 1                      | -0.326 |
| 13540703  | PDE1A     | phosphodiesterase 1A                                  | -0.326 |
| 13786144  | PREP      | prolyl endopeptidase                                  | -0.325 |
| 300797330 | PTPRU     | protein tyrosine phosphatase, receptor type U         | -0.323 |
| 112350    | N/A       | N/A                                                   | -0.323 |
| 672026875 | N/A       | N/A                                                   | -0.323 |
| 257096063 | IGLON5    | IgLON family member 5                                 | -0.321 |
| 149041432 | THY1      | Thy-1 cell surface antigen                            | -0.321 |
| 148702078 | CPSF3     | cleavage and polyadenylation specific factor 3        | -0.320 |
| 149041576 | REXO2     | RNA exonuclease 2                                     | -0.319 |
| 392334157 | SEMA6A    | semaphorin 6A                                         | -0.318 |
| 158186726 | FUCA1     | alpha-L-fucosidase 1                                  | -0.317 |
| 33286888  | GJA1      | gap junction protein alpha 1                          | -0.317 |
| 16758712  | PDIA4     | protein disulfide isomerase family A member 4         | -0.317 |
| 57114344  | UHRF1     | ubiquitin like with PHD and ring finger domains 1     | -0.317 |
| 74315992  | INHBB     | inhibin beta B subunit                                | -0.315 |
| 564310645 | PLXNB1    | plexin B1                                             | -0.315 |
| 672060041 | N/A       | N/A                                                   | -0.315 |
| 928154944 | HNRNPC    | heterogeneous nuclear ribonucleoprotein C (C1/C2)     | -0.314 |
| 672076306 | NWD2      | NACHT and WD repeat domain containing 2               | -0.314 |
| 346989661 | CPEB2     | cytoplasmic polyadenylation element binding protein 2 | -0.312 |
| 288541382 | DIS3L2    | DIS3 like 3'-5' exoribonuclease 2                     | -0.312 |
| 149063353 | IFT81     | intraflagellar transport 81                           | -0.311 |
| 564358836 | NT5DC3    | 5'-nucleotidase domain containing 3                   | -0.311 |
| 209364556 | BACH2     | BTB domain and CNC homolog 2                          | -0.310 |
| 13994179  | SLC24A2   | solute carrier family 24 member 2                     | -0.310 |
| 149041833 | N/A       | N/A                                                   | -0.310 |
| 25453420  | GSTP1     | glutathione S-transferase pi 1                        | -0.309 |
| 564389730 | PLAT      | plasminogen activator, tissue type                    | -0.309 |

|           |            |                                                                                                 |        |
|-----------|------------|-------------------------------------------------------------------------------------------------|--------|
| 38259192  | TOP2A      | DNA topoisomerase II alpha                                                                      | -0.309 |
| 672062144 | FAM219B    | family with sequence similarity 219 member B                                                    | -0.308 |
| 6981168   | LPL        | lipoprotein lipase                                                                              | -0.308 |
| 109480098 | SMARCC2    | SWI/SNF related, matrix associated, actin dependent regulator of chromatin subfamily c member 2 | -0.307 |
| 672043249 | DENND4B    | DENN domain containing 4B                                                                       | -0.306 |
| 269954719 | JAZF1      | JAZF zinc finger 1                                                                              | -0.305 |
| 752420454 | N/A        | N/A                                                                                             | -0.305 |
| 123405    | POU3F1     | POU class 3 homeobox 1                                                                          | -0.304 |
| 426357412 | N/A        | N/A                                                                                             | -0.304 |
| 564399600 | PHKA1      | phosphorylase kinase regulatory subunit alpha 1                                                 | -0.303 |
| 564360941 | N/A        | N/A                                                                                             | -0.302 |
| 62078897  | NCLN       | nicalin                                                                                         | -0.301 |
| 51948488  | SIRT5      | sirtuin 5                                                                                       | -0.301 |
| 672024549 | SLX4       | SLX4 structure-specific endonuclease subunit                                                    | -0.301 |
| 927191125 | N/A        | N/A                                                                                             | -0.299 |
| 20301974  | VMP1       | vacuole membrane protein 1                                                                      | -0.298 |
| 27229055  | HYPK       | huntingtin interacting protein K                                                                | -0.297 |
| 564333746 | MMS19      | MMS19 homolog, cytosolic iron-sulfur assembly component                                         | -0.297 |
| 564307561 | RPS6KL1    | ribosomal protein S6 kinase like 1                                                              | -0.297 |
| 686661093 | SLC24A3    | solute carrier family 24 member 3                                                               | -0.296 |
| 13592129  | DOC2B      | double C2 domain beta                                                                           | -0.295 |
| 74201328  | ST6GALNAC4 | ST6 N-acetylgalactosaminide alpha-2,6-sialyltransferase 4                                       | -0.295 |
| 157819209 | ZNF575     | zinc finger protein 575                                                                         | -0.295 |
| 198442897 | AFG3L2     | AFG3 like matrix AAA peptidase subunit 2                                                        | -0.294 |
| 747811827 | HID1       | HID1 domain containing                                                                          | -0.294 |
| 404434384 | GALNT11    | polypeptide N-acetylgalactosaminyltransferase 11                                                | -0.293 |
| 564357258 | CCDC85C    | coiled-coil domain containing 85C                                                               | -0.292 |
| 672085486 | EGLN1      | egl-9 family hypoxia inducible factor 1                                                         | -0.291 |
| 157786874 | Fmn1l      | formin-like 1                                                                                   | -0.291 |
| 13027442  | ARHGEF11   | Rho guanine nucleotide exchange factor 11                                                       | -0.288 |
| 161086978 | CAPZA1     | capping actin protein of muscle Z-line alpha subunit 1                                          | -0.288 |
| 61556795  | IGFBP7     | insulin like growth factor binding protein 7                                                    | -0.288 |
| 60359932  | PPM1H      | protein phosphatase, Mg <sup>2+</sup> /Mn <sup>2+</sup> dependent 1H                            | -0.288 |

|           |         |                                                                  |        |
|-----------|---------|------------------------------------------------------------------|--------|
| 75905809  | AKAP12  | A-kinase anchoring protein 12                                    | -0.286 |
| 157819725 | CEP131  | centrosomal protein 131                                          | -0.286 |
| 9506523   | CSPG5   | chondroitin sulfate proteoglycan 5                               | -0.286 |
| 564318875 | PSD3    | pleckstrin and Sec7 domain containing 3                          | -0.286 |
| 309243082 | PTPRJ   | protein tyrosine phosphatase, receptor type J                    | -0.286 |
| 954249788 | N/A     | N/A                                                              | -0.286 |
| 28972652  | SLC12A5 | solute carrier family 12 member 5                                | -0.285 |
| 50356003  | SCP2    | sterol carrier protein 2                                         | -0.284 |
| 564396646 | VAR2    | valyl-tRNA synthetase 2, mitochondrial                           | -0.284 |
| 42491372  | ERMP1   | endoplasmic reticulum metalloproteinase 1                        | -0.283 |
| 157820833 | HERC3   | HECT and RLD domain containing E3 ubiquitin protein ligase 3     | -0.283 |
| 149024348 | RAP1GAP | RAP1 GTPase activating protein                                   | -0.283 |
| 61556829  | RIT2    | Ras like without CAAX 2                                          | -0.283 |
| 16758208  | SRM     | spermidine synthase                                              | -0.283 |
| 158749584 | SUCLA2  | succinate-CoA ligase ADP-forming beta subunit                    | -0.283 |
| 672058250 | CKAP4   | cytoskeleton associated protein 4                                | -0.282 |
| 73661200  | SPRN    | shadow of prion protein                                          | -0.282 |
| 293343483 | NHSL1   | NHS like 1                                                       | -0.281 |
| 511925477 | N/A     | N/A                                                              | -0.281 |
| 537212823 | N/A     | N/A                                                              | -0.281 |
| 672057964 | N/A     | N/A                                                              | -0.280 |
| 149022622 | ACP2    | acid phosphatase 2, lysosomal                                    | -0.278 |
| 157820195 | C1QTNF4 | C1q and TNF related 4                                            | -0.278 |
| 564360297 | N/A     | N/A                                                              | -0.277 |
| 71725385  | DIRAS2  | DIRAS family GTPase 2                                            | -0.276 |
| 189027115 | AIDA    | axin interactor, dorsalization associated                        | -0.275 |
| 205755    | TAGLN3  | transgelin 3                                                     | -0.275 |
| 564394868 | CC2D1A  | coiled-coil and C2 domain containing 1A                          | -0.273 |
| 13591981  | LSS     | lanosterol synthase                                              | -0.273 |
| 128485638 | PLOD3   | procollagen-lysine,2-oxoglutarate 5-dioxygenase 3                | -0.273 |
| 589922499 | N/A     | N/A                                                              | -0.273 |
| 149049455 | Ptms    | parathyrosin                                                     | -0.272 |
| 300797936 | ACTR3B  | ARP3 actin related protein 3 homolog B                           | -0.271 |
| 145279186 | GAS6    | growth arrest specific 6                                         | -0.271 |
| 157820049 | LRFN5   | leucine rich repeat and fibronectin type III domain containing 5 | -0.271 |
| 9055178   | MPC1    | mitochondrial pyruvate carrier 1                                 | -0.271 |

|           |          |                                                                                    |        |
|-----------|----------|------------------------------------------------------------------------------------|--------|
| 16758726  | SLC17A7  | solute carrier family 17 member 7                                                  | -0.271 |
| 50878267  | HCN2     | hyperpolarization activated cyclic nucleotide gated potassium and sodium channel 2 | -0.270 |
| 149034474 | TIMM13   | translocase of inner mitochondrial membrane 13                                     | -0.270 |
| 672055089 | N/A      | N/A                                                                                | -0.270 |
| 50510855  | RIMKLB   | ribosomal modification protein rimK like family member B                           | -0.269 |
| 160333093 | TPRG1L   | tumor protein p63 regulated 1 like                                                 | -0.269 |
| 157816923 | MRPL4    | mitochondrial ribosomal protein L4                                                 | -0.268 |
| 77404265  | JAM2     | junctional adhesion molecule 2                                                     | -0.267 |
| 148671603 | LRP11    | LDL receptor related protein 11                                                    | -0.267 |
| 358030320 | DMTN     | dematin actin binding protein                                                      | -0.266 |
| 19705437  | EPHA7    | EPH receptor A7                                                                    | -0.266 |
| 71122474  | PPA1     | pyrophosphatase (inorganic) 1                                                      | -0.266 |
| 8394496   | TYRO3    | TYRO3 protein tyrosine kinase                                                      | -0.266 |
| 157822933 | ZNF385A  | zinc finger protein 385A                                                           | -0.266 |
| 79750129  | CAMK1D   | calcium/calmodulin dependent protein kinase ID                                     | -0.265 |
| 155369295 | KIAA1841 | KIAA1841                                                                           | -0.265 |
| 13489067  | NSF      | N-ethylmaleimide sensitive factor, vesicle fusing ATPase                           | -0.265 |
| 148678721 | SOX5     | SRY-box 5                                                                          | -0.265 |
| 861445795 | N/A      | N/A                                                                                | -0.265 |
| 564382292 | ANGEL2   | angel homolog 2                                                                    | -0.263 |
| 115292425 | KIRREL3  | kirre like nephrin family adhesion molecule 3                                      | -0.263 |
| 13242271  | SLC6A11  | solute carrier family 6 member 11                                                  | -0.263 |
| 16758186  | SLCO1C1  | solute carrier organic anion transporter family member 1C1                         | -0.263 |
| 795289844 | N/A      | N/A                                                                                | -0.263 |
| 157819077 | TRIM37   | tripartite motif containing 37                                                     | -0.262 |
| 148666046 | FAM84A   | family with sequence similarity 84 member A                                        | -0.261 |
| 148674172 | TP53INP2 | tumor protein p53 inducible nuclear protein 2                                      | -0.261 |
| 564344879 | N/A      | N/A                                                                                | -0.261 |
| 62078931  | PAQR8    | progesterin and adipoQ receptor family member 8                                    | -0.260 |
| 157786976 | RGL1     | ral guanine nucleotide dissociation stimulator like 1                              | -0.259 |
| 74179798  | PCSK2    | proprotein convertase subtilisin/kexin type 2                                      | -0.258 |
| 747019224 | SRCAP    | Snf2 related CREBBP activator protein                                              | -0.258 |
| 564371892 | N/A      | N/A                                                                                | -0.258 |



|           |            |                                                                                  |        |
|-----------|------------|----------------------------------------------------------------------------------|--------|
| 564378247 | CCZ1/CCZ1B | CCZ1 homolog B, vacuolar protein trafficking and biogenesis associated           | -0.257 |
| 564351380 | CDK5RAP2   | CDK5 regulatory subunit associated protein 2                                     | -0.257 |
| 9507083   | SEMA4F     | semaphorin 4F                                                                    | -0.257 |
| 157822443 | AGPAT3     | 1-acylglycerol-3-phosphate O-acyltransferase 3                                   | -0.256 |
| 56388748  | Anp32a     | acidic (leucine-rich) nuclear phosphoprotein 32 family, member A                 | -0.256 |
| 157952208 | BAG1       | BCL2 associated athanogene 1                                                     | -0.256 |
| 404312657 | NCAN       | neurocan                                                                         | -0.256 |
| 940716821 | N/A        | N/A                                                                              | -0.255 |
| 40254752  | PGK1       | phosphoglycerate kinase 1                                                        | -0.254 |
| 674094346 | N/A        | N/A                                                                              | -0.254 |
| 3043568   | IQSEC2     | IQ motif and Sec7 domain 2                                                       | -0.253 |
| 77539756  | MED24      | mediator complex subunit 24                                                      | -0.253 |
| 672026416 | PRR36      | proline rich 36                                                                  | -0.252 |
| 157824000 | C8orf46    | chromosome 8 open reading frame 46                                               | -0.251 |
| 157817710 | FER        | FER tyrosine kinase                                                              | -0.251 |
| 564337070 | N/A        | N/A                                                                              | -0.251 |
| 148693489 | Nrgn       | neurogranin                                                                      | -0.250 |
| 564377215 | N/A        | N/A                                                                              | -0.250 |
| 16758080  | COL1A2     | collagen type I alpha 2 chain                                                    | -0.249 |
| 8393823   | Nefm       | neurofilament, medium polypeptide                                                | -0.249 |
| 300795140 | TAF1       | TATA-box binding protein associated factor 1                                     | -0.248 |
| 672013187 | DMWD       | DM1 locus, WD repeat containing                                                  | -0.247 |
| 158749644 | MCM6       | minichromosome maintenance complex component 6                                   | -0.247 |
| 22902132  | RBM10      | RNA binding motif protein 10                                                     | -0.247 |
| 22219454  | SLC16A2    | solute carrier family 16 member 2                                                | -0.247 |
| 564343565 | N/A        | N/A                                                                              | -0.247 |
| 149050766 | CAD        | carbamoyl-phosphate synthetase 2, aspartate transcarbamylase, and dihydroorotase | -0.246 |
| 13386106  | NUDT21     | nudix hydrolase 21                                                               | -0.246 |
| 913512819 | N/A        | N/A                                                                              | -0.246 |
| 21687010  | CACNG4     | calcium voltage-gated channel auxiliary subunit gamma 4                          | -0.245 |
| 795351870 | N/A        | N/A                                                                              | -0.245 |
| 215272398 | HIP1       | huntingtin interacting protein 1                                                 | -0.244 |
| 149054795 | RGD1309310 | similar to mKIAA0195 protein                                                     | -0.244 |
| 931568103 | N/A        | N/A                                                                              | -0.244 |
| 15805026  | ZFAND6     | zinc finger AN1-type containing 6                                                | -0.243 |

|           |          |                                                                    |        |
|-----------|----------|--------------------------------------------------------------------|--------|
| 15011857  | SELENOP  | selenoprotein P                                                    | -0.241 |
| 672017118 | N/A      | N/A                                                                | -0.241 |
| 564368926 | N/A      | N/A                                                                | -0.241 |
| 965962418 | N/A      | N/A                                                                | -0.240 |
| 564329074 | UNC45A   | unc-45 myosin chaperone A                                          | -0.238 |
| 6978613   | CCK      | cholecystokinin                                                    | -0.237 |
| 157818983 | SIRT7    | sirtuin 7                                                          | -0.236 |
| 821419425 | N/A      | N/A                                                                | -0.236 |
| 162287198 | HSD17B4  | hydroxysteroid 17-beta dehydrogenase 4                             | -0.235 |
| 148683194 | INTS3    | integrator complex subunit 3                                       | -0.235 |
| 300797239 | MARK4    | microtubule affinity regulating kinase 4                           | -0.234 |
| 77627981  | SHANK1   | SH3 and multiple ankyrin repeat domains 1                          | -0.233 |
| 16758840  | CRYM     | crystallin mu                                                      | -0.230 |
| 157819371 | SYNGR3   | synaptogyrin 3                                                     | -0.229 |
| 54234046  | CST3     | cystatin C                                                         | -0.228 |
| 149037913 | N/A      | N/A                                                                | -0.227 |
| 672079582 | N/A      | N/A                                                                | -0.226 |
| 148689145 | CPNE4    | copine 4                                                           | -0.225 |
| 283046651 | PTPRZ1   | protein tyrosine phosphatase, receptor type Z1                     | -0.225 |
| 880942118 | N/A      | N/A                                                                | -0.225 |
| 142349612 | GLUL     | glutamate-ammonia ligase                                           | -0.224 |
| 18777747  | MGEA5    | meningioma expressed antigen 5 (hyaluronidase)                     | -0.224 |
| 148710162 | SLC8A2   | solute carrier family 8 member A2                                  | -0.224 |
| 157819753 | RCN1     | reticulocalbin 1                                                   | -0.223 |
| 157819361 | TTYH1    | tweety family member 1                                             | -0.223 |
| 149017194 | KDM3B    | lysine demethylase 3B                                              | -0.221 |
| 300794237 | LIMCH1   | LIM and calponin homology domains 1                                | -0.221 |
| 19705535  | PACS1    | phosphofurin acidic cluster sorting protein 1                      | -0.220 |
| 300793998 | SHISA6   | shisa family member 6                                              | -0.220 |
| 149066619 | B4GALNT1 | beta-1,4-N-acetyl-galactosaminyltransferase 1                      | -0.219 |
| 255683359 | FBXL17   | F-box and leucine rich repeat protein 17                           | -0.219 |
| 157822175 | NDUFB10  | NADH:ubiquinone oxidoreductase subunit B10                         | -0.219 |
| 392334416 | TCF25    | transcription factor 25                                            | -0.219 |
| 54312094  | DAGLA    | diacylglycerol lipase alpha                                        | -0.218 |
| 6978888   | GFRA1    | GDNF family receptor alpha 1                                       | -0.218 |
| 11560055  | KHDRBS3  | KH RNA binding domain containing, signal transduction associated 3 | -0.217 |
| 672046063 | Slc25a12 | solute carrier family 25 member 12                                 | -0.217 |
| 20376818  | WBP2     | WW domain binding protein 2                                        | -0.217 |

|           |          |                                                                    |        |
|-----------|----------|--------------------------------------------------------------------|--------|
| 16758160  | BNIP3    | BCL2 interacting protein 3                                         | -0.215 |
| 14091777  | Chn1     | chimerin 1                                                         | -0.214 |
| 148687519 | CALN1    | calneuron 1                                                        | -0.212 |
| 68341995  | NDUFS4   | NADH:ubiquinone oxidoreductase subunit S4                          | -0.212 |
| 157817839 | SEMA5A   | semaphorin 5A                                                      | -0.212 |
| 564342542 | MAP1A    | microtubule associated protein 1A                                  | -0.211 |
| 564344373 | ZMYND8   | zinc finger MYND-type containing 8                                 | -0.211 |
| 57526927  | LARS     | leucyl-tRNA synthetase                                             | -0.210 |
| 564385256 | N/A      | N/A                                                                | -0.210 |
| 568980664 | ATG2B    | autophagy related 2B                                               | -0.209 |
| 148747253 | ATP1B1   | ATPase Na <sup>+</sup> /K <sup>+</sup> transporting subunit beta 1 | -0.209 |
| 149015822 | SLC9A6   | solute carrier family 9 member A6                                  | -0.209 |
| 149023410 | SNAP25   | synaptosome associated protein 25                                  | -0.209 |
| 149016843 | N/A      | N/A                                                                | -0.209 |
| 149022319 | AGPS     | alkylglycerone phosphate synthase                                  | -0.208 |
| 149067833 | ALDOA    | aldolase, fructose-bisphosphate A                                  | -0.208 |
| 160333459 | Cox6c    | cytochrome c oxidase subunit VIc                                   | -0.208 |
| 672057971 | MEX3D    | mex-3 RNA binding family member D                                  | -0.208 |
| 972956729 | N/A      | N/A                                                                | -0.207 |
| 39104626  | CAMK2A   | calcium/calmodulin dependent protein kinase II alpha               | -0.206 |
| 195972823 | TMEM181  | transmembrane protein 181                                          | -0.206 |
| 564322686 | N/A      | N/A                                                                | -0.206 |
| 672036086 | ARHGAP33 | Rho GTPase activating protein 33                                   | -0.205 |
| 594629505 | N/A      | N/A                                                                | -0.205 |
| 50511338  | FUT8     | fucosyltransferase 8                                               | -0.204 |
| 157821895 | GDAP1    | ganglioside induced differentiation associated protein 1           | -0.204 |
| 71896543  | SHANK3   | SH3 and multiple ankyrin repeat domains 3                          | -0.204 |
| 300796933 | WNK2     | WNK lysine deficient protein kinase 2                              | -0.204 |
| 157819955 | DTD1     | D-tyrosyl-tRNA deacylase 1                                         | -0.203 |
| 8393490   | GRM5     | glutamate metabotropic receptor 5                                  | -0.203 |
| 568999199 | MEA1     | male-enhanced antigen 1                                            | -0.203 |
| 157786690 | PRKCA    | protein kinase C alpha                                             | -0.203 |
| 686735522 | N/A      | N/A                                                                | -0.203 |
| 817280433 | N/A      | N/A                                                                | -0.203 |
| 823430370 | N/A      | N/A                                                                | -0.203 |
| 148706945 | TXNIP    | thioredoxin interacting protein                                    | -0.202 |
| 564377500 | N/A      | N/A                                                                | -0.202 |
| 554543965 | N/A      | N/A                                                                | -0.202 |

|           |         |                                                                                                   |        |
|-----------|---------|---------------------------------------------------------------------------------------------------|--------|
| 564370831 | CASKIN1 | CASK interacting protein 1                                                                        | -0.201 |
| 386781556 | YBX3    | Y-box binding protein 3                                                                           | -0.201 |
| 149043701 | N/A     | N/A                                                                                               | -0.201 |
| 564388576 | CILP2   | cartilage intermediate layer protein 2                                                            | -0.200 |
| 149041736 | RCN2    | reticulocalbin 2                                                                                  | -0.200 |
| 6978545   | ATP1A2  | ATPase Na <sup>+</sup> /K <sup>+</sup> transporting subunit alpha 2                               | -0.199 |
| 148707802 | DARS    | aspartyl-tRNA synthetase                                                                          | -0.199 |
| 198278463 | MAST3   | microtubule associated serine/threonine kinase 3                                                  | -0.199 |
| 59858990  | UNC13A  | unc-13 homolog A                                                                                  | -0.199 |
| 55741502  | ACAT2   | acetyl-CoA acetyltransferase 2                                                                    | -0.198 |
| 50511245  | MEX3B   | mex-3 RNA binding family member B                                                                 | -0.198 |
| 157817420 | NRIP3   | nuclear receptor interacting protein 3                                                            | -0.198 |
| 109472884 | UBE3C   | ubiquitin protein ligase E3C                                                                      | -0.198 |
| 13592131  | DGKZ    | diacylglycerol kinase zeta                                                                        | -0.197 |
| 672036872 | PRR12   | proline rich 12                                                                                   | -0.197 |
| 13929208  | Scd2    | stearoyl-Coenzyme A desaturase 2                                                                  | -0.197 |
| 664703871 | N/A     | N/A                                                                                               | -0.197 |
| 227913    | N/A     | N/A                                                                                               | -0.197 |
| 672040941 | ATRNL1  | attractin like 1                                                                                  | -0.196 |
| 157818219 | MMP15   | matrix metalloproteinase 15                                                                       | -0.195 |
| 29789369  | PTPRG   | protein tyrosine phosphatase, receptor type G                                                     | -0.195 |
| 60360078  | SHTN1   | shootin 1                                                                                         | -0.195 |
| 584277046 | SLC1A3  | solute carrier family 1 member 3                                                                  | -0.195 |
| 84000579  | FTL     | ferritin light chain                                                                              | -0.194 |
| 56605990  | LRPPRC  | leucine rich pentatricopeptide repeat containing                                                  | -0.194 |
| 62078997  | WDR1    | WD repeat domain 1                                                                                | -0.194 |
| 926693529 | N/A     | N/A                                                                                               | -0.194 |
| 31542604  | ERC1    | ELKS/RAB6-interacting/CAST family member 1                                                        | -0.193 |
| 41529837  | JUP     | junction plakoglobin                                                                              | -0.193 |
| 38454208  | KCTD13  | potassium channel tetramerization domain containing 13                                            | -0.193 |
| 58865508  | SMARCD3 | SWI/SNF related, matrix associated, actin dependent regulator of chromatin, subfamily d, member 3 | -0.193 |
| 564381813 | N/A     | N/A                                                                                               | -0.192 |
| 8394227   | PTPRO   | protein tyrosine phosphatase, receptor type O                                                     | -0.191 |
| 56605704  | SERINC3 | serine incorporator 3                                                                             | -0.191 |
| 820973857 | N/A     | N/A                                                                                               | -0.191 |

|           |                             |                                                                            |        |
|-----------|-----------------------------|----------------------------------------------------------------------------|--------|
| 149032539 | HECW1                       | HECT, C2 and WW domain containing E3 ubiquitin protein ligase 1            | -0.190 |
| 148695758 | CAPRIN1                     | cell cycle associated protein 1                                            | -0.188 |
| 6978751   | CYP51A1                     | cytochrome P450 family 51 subfamily A member 1                             | -0.188 |
| 55249662  | Masp1                       | mannan-binding lectin serine peptidase 1                                   | -0.188 |
| 57114294  | SLC39A7                     | solute carrier family 39 member 7                                          | -0.187 |
| 149053224 | PFN1                        | profilin 1                                                                 | -0.186 |
| 157823887 | MLC1                        | megalencephalic leukoencephalopathy with subcortical cysts 1               | -0.185 |
| 293346766 | TCAF1                       | TRPM8 channel associated factor 1                                          | -0.185 |
| 795272288 | N/A                         | N/A                                                                        | -0.185 |
| 259155312 | AGAP2                       | ArfGAP with GTPase domain, ankyrin repeat and PH domain 2                  | -0.184 |
| 182888557 | FAM57B                      | family with sequence similarity 57 member B                                | -0.184 |
| 568941844 | IQSEC3                      | IQ motif and Sec7 domain 3                                                 | -0.184 |
| 8394328   | SOD1                        | superoxide dismutase 1                                                     | -0.184 |
| 83267872  | ADNP                        | activity dependent neuroprotector homeobox                                 | -0.183 |
| 568974914 | SRCIN1                      | SRC kinase signaling inhibitor 1                                           | -0.183 |
| 402794619 | ADAM10                      | ADAM metallopeptidase domain 10                                            | -0.182 |
| 471434853 | BCL11B                      | B cell CLL/lymphoma 11B                                                    | -0.182 |
| 564324344 | LOC363306 (includes others) | hypothetical protein LOC363306                                             | -0.182 |
| 148692349 | ATP1A3                      | ATPase Na <sup>+</sup> /K <sup>+</sup> transporting subunit alpha 3        | -0.181 |
| 257796229 | SYNGAP1                     | synaptic Ras GTPase activating protein 1                                   | -0.181 |
| 164519053 | FAM131B                     | family with sequence similarity 131 member B                               | -0.179 |
| 149036745 | FBLN2                       | fibulin 2                                                                  | -0.178 |
| 148698650 | NASP                        | nuclear autoantigenic sperm protein                                        | -0.177 |
| 148696327 | PTPRA                       | protein tyrosine phosphatase, receptor type A                              | -0.177 |
| 564364792 | SNAP91                      | synaptosome associated protein 91                                          | -0.176 |
| 6756037   | YWHAH                       | tyrosine 3-monooxygenase/tryptophan 5-monooxygenase activation protein eta | -0.176 |
| 6681095   | CYCS                        | cytochrome c, somatic                                                      | -0.174 |
| 564396135 | KIAA0513                    | KIAA0513                                                                   | -0.174 |
| 830015746 | N/A                         | N/A                                                                        | -0.174 |
| 564396731 | N/A                         | N/A                                                                        | -0.174 |
| 625196919 | N/A                         | N/A                                                                        | -0.173 |
| 149028426 | PCSK1N                      | proprotein convertase subtilisin/kexin type 1 inhibitor                    | -0.171 |
| 672058640 | N/A                         | N/A                                                                        | -0.171 |

|           |           |                                                                         |        |
|-----------|-----------|-------------------------------------------------------------------------|--------|
| 9665227   | DLG4      | discs large MAGUK scaffold protein 4                                    | -0.170 |
| 183396771 | HSPD1     | heat shock protein family D (Hsp60) member 1                            | -0.170 |
| 744617549 | N/A       | N/A                                                                     | -0.170 |
| 32527699  | LOC301444 | pseudogene for diazepam binding inhibitor 1                             | -0.168 |
| 109475418 | FOXO6     | forkhead box O6                                                         | -0.166 |
| 564379471 | RPH3A     | rabphilin 3A                                                            | -0.165 |
| 70778983  | SFPQ      | splicing factor proline and glutamine rich                              | -0.165 |
| 77404395  | SND1      | staphylococcal nuclease and tudor domain containing 1                   | -0.165 |
| 148700340 | N/A       | N/A                                                                     | -0.165 |
| 6739575   | ARL6IP1   | ADP ribosylation factor like GTPase 6 interacting protein 1             | -0.164 |
| 625214802 | N/A       | N/A                                                                     | -0.164 |
| 157786960 | PIK3C2B   | phosphatidylinositol-4-phosphate 3-kinase catalytic subunit type 2 beta | -0.163 |
| 8850229   | MAP6      | microtubule associated protein 6                                        | -0.161 |
| 164519074 | PDE4D     | phosphodiesterase 4D                                                    | -0.160 |
| 158186636 | PDGFRA    | platelet derived growth factor receptor alpha                           | -0.160 |
| 8394502   | UBC       | ubiquitin C                                                             | -0.160 |
| 564347713 | N/A       | N/A                                                                     | -0.160 |
| 47271544  | FKBP1A    | FK506 binding protein 1A                                                | -0.159 |
| 6980956   | GLUD1     | glutamate dehydrogenase 1                                               | -0.159 |
| 197209847 | JAK1      | Janus kinase 1                                                          | -0.159 |
| 149019802 | SEPT5     | septin 5                                                                | -0.159 |
| 148673176 | FABP7     | fatty acid binding protein 7                                            | -0.158 |
| 823419536 | N/A       | N/A                                                                     | -0.158 |
| 17985949  | HBB       | hemoglobin subunit beta                                                 | -0.157 |
| 156139151 | PDS5B     | PDS5 cohesin associated factor B                                        | -0.157 |
| 37359962  | PLPPR4    | phospholipid phosphatase related 4                                      | -0.157 |
| 674071606 | N/A       | N/A                                                                     | -0.157 |
| 58865384  | NDUFS2    | NADH:ubiquinone oxidoreductase core subunit S2                          | -0.156 |
| 16923964  | CNTN1     | contactin 1                                                             | -0.155 |
| 83404987  | FTH1      | ferritin heavy chain 1                                                  | -0.155 |
| 744616901 | N/A       | N/A                                                                     | -0.155 |
| 564329392 | FLNA      | filamin A                                                               | -0.154 |
| 634833336 | N/A       | N/A                                                                     | -0.154 |
| 641706489 | N/A       | N/A                                                                     | -0.154 |
| 201066380 | FSCN1     | fascin actin-bundling protein 1                                         | -0.153 |
| 13027448  | ZNF354C   | zinc finger protein 354C                                                | -0.153 |

|           |         |                                                                    |        |
|-----------|---------|--------------------------------------------------------------------|--------|
| 97537309  | SYNJ1   | synaptojanin 1                                                     | -0.152 |
| 396941666 | Dync1i2 | dynein cytoplasmic 1 intermediate chain 2                          | -0.151 |
| 58865906  | PLD3    | phospholipase D family member 3                                    | -0.151 |
| 148679695 | COX4I1  | cytochrome c oxidase subunit 4I1                                   | -0.150 |
| 60360580  | OGDH    | oxoglutarate dehydrogenase                                         | -0.150 |
| 56799390  | ATP1B2  | ATPase Na <sup>+</sup> /K <sup>+</sup> transporting subunit beta 2 | -0.149 |
| 149050122 | KCTD12  | potassium channel tetramerization domain containing 12             | -0.149 |
| 56388799  | CKB     | creatine kinase B                                                  | -0.148 |
| 157823333 | FBXO41  | F-box protein 41                                                   | -0.148 |
| 537137169 | N/A     | N/A                                                                | -0.148 |
| 71043650  | SRPK1   | SRSF protein kinase 1                                              | -0.146 |
| 564301979 | CKAP5   | cytoskeleton associated protein 5                                  | -0.145 |
| 187469796 | MBD3    | methyl-CpG binding domain protein 3                                | -0.145 |
| 564394830 | NACC1   | nucleus accumbens associated 1                                     | -0.145 |
| 537235061 | N/A     | N/A                                                                | -0.145 |
| 924184038 | INA     | internexin neuronal intermediate filament protein alpha            | -0.144 |
| 823419836 | N/A     | N/A                                                                | -0.144 |
| 625184908 | N/A     | N/A                                                                | -0.144 |
| 299829287 | DISP2   | dispatched RND transporter family member 2                         | -0.143 |
| 157818467 | HSPA12A | heat shock protein family A (Hsp70) member 12A                     | -0.143 |
| 403044506 | SUPT5H  | SPT5 homolog, DSIF elongation factor subunit                       | -0.143 |
| 815891312 | CACNA1G | calcium voltage-gated channel subunit alpha1 G                     | -0.142 |
| 564368910 | FN1     | fibronectin 1                                                      | -0.142 |
| 55741681  | ITM2B   | integral membrane protein 2B                                       | -0.142 |
| 148669961 | SLC6A17 | solute carrier family 6 member 17                                  | -0.142 |
| 58865922  | ZFAND3  | zinc finger AN1-type containing 3                                  | -0.142 |
| 537236584 | N/A     | N/A                                                                | -0.142 |
| 40254595  | DPYSL2  | dihydropyrimidinase like 2                                         | -0.141 |
| 953851560 | N/A     | N/A                                                                | -0.141 |
| 564352388 | N/A     | N/A                                                                | -0.141 |
| 112421036 | POU3F3  | POU class 3 homeobox 3                                             | -0.139 |
| 74224296  | RNF10   | ring finger protein 10                                             | -0.139 |
| 148689290 | CAMKV   | CaM kinase like vesicle associated                                 | -0.137 |
| 56605688  | USP14   | ubiquitin specific peptidase 14                                    | -0.137 |
| 16923990  | EPN1    | epsin 1                                                            | -0.134 |
| 13929002  | PFKM    | phosphofructokinase, muscle                                        | -0.134 |
| 149036434 | N/A     | N/A                                                                | -0.134 |

|           |           |                                                           |        |
|-----------|-----------|-----------------------------------------------------------|--------|
| 148673282 | CCNI      | cyclin I                                                  | -0.133 |
| 38649320  | ENO1      | enolase 1                                                 | -0.133 |
| 270288782 | REEP5     | receptor accessory protein 5                              | -0.132 |
| 926708692 | N/A       | N/A                                                       | -0.132 |
| 507617067 | N/A       | N/A                                                       | -0.132 |
| 672044124 | N/A       | N/A                                                       | -0.132 |
| 157819095 | PNMA8B    | PNMA family member 8B                                     | -0.131 |
| 564379895 | SEZ6L     | seizure related 6 homolog like                            | -0.130 |
| 157824115 | AGAP3     | ArfGAP with GTPase domain, ankyrin repeat and PH domain 3 | -0.129 |
| 407728599 | CTNND2    | catenin delta 2                                           | -0.129 |
| 39930503  | ATP5F1C   | ATP synthase F1 subunit gamma                             | -0.128 |
| 25453410  | CACNA1B   | calcium voltage-gated channel subunit alpha1 B            | -0.128 |
| 25282419  | CANX      | calnexin                                                  | -0.127 |
| 208022666 | CELF5     | CUGBP Elav-like family member 5                           | -0.126 |
| 564396924 | PRRC2A    | proline rich coiled-coil 2A                               | -0.126 |
| 569007927 | PSD       | pleckstrin and Sec7 domain containing                     | -0.126 |
| 254028210 | CMIP      | c-Maf inducing protein                                    | -0.125 |
| 25742763  | HSPA5     | heat shock protein family A (Hsp70) member 5              | -0.125 |
| 564304046 | PLXNA1    | plexin A1                                                 | -0.125 |
| 253683488 | NTRK2     | neurotrophic receptor tyrosine kinase 2                   | -0.124 |
| 50510949  | N/A       | N/A                                                       | -0.124 |
| 51172604  | JPH4      | junctophilin 4                                            | -0.123 |
| 524962788 | N/A       | N/A                                                       | -0.123 |
| 157820001 | AGTPBP1   | ATP/GTP binding protein 1                                 | -0.122 |
| 564398462 | Slc9a7    | solute carrier family 9 member A7                         | -0.122 |
| 953875962 | N/A       | N/A                                                       | -0.122 |
| 60360518  | KIF5A     | kinesin family member 5A                                  | -0.119 |
| 60678292  | Hba1/Hba2 | hemoglobin, alpha 1                                       | -0.117 |
| 68534276  | NSMCE3    | NSE3 homolog, SMC5-SMC6 complex component                 | -0.117 |
| 281306763 | NTN3      | netrin 3                                                  | -0.117 |
| 12667448  | Syt7      | synaptotagmin 7                                           | -0.115 |
| 634876791 | N/A       | N/A                                                       | -0.113 |
| 585689575 | N/A       | N/A                                                       | -0.113 |
| 148747541 | HNRNPU    | heterogeneous nuclear ribonucleoprotein U                 | -0.109 |
| 68341973  | WASF1     | WAS protein family member 1                               | -0.109 |
| 472359423 | N/A       | N/A                                                       | -0.109 |
| 166235165 | SYP       | synaptophysin                                             | -0.108 |
| 148678962 | N/A       | N/A                                                       | -0.108 |



|           |          |                                                                   |        |
|-----------|----------|-------------------------------------------------------------------|--------|
| 672059390 | N/A      | N/A                                                               | -0.108 |
| 119614889 | DYNLL2   | dynein light chain LC8-type 2                                     | -0.107 |
| 158186672 | Nedd4    | neural precursor cell expressed, developmentally down-regulated 4 | -0.107 |
| 32189355  | SLC25A4  | solute carrier family 25 member 4                                 | -0.107 |
| 61557085  | SPTBN1   | spectrin beta, non-erythrocytic 1                                 | -0.107 |
| 354496829 | N/A      | N/A                                                               | -0.107 |
| 564378945 | N/A      | N/A                                                               | -0.106 |
| 149043744 | CABIN1   | calcineurin binding protein 1                                     | -0.104 |
| 55249691  | CPE      | carboxypeptidase E                                                | -0.103 |
| 564370968 | MAPK8IP3 | mitogen-activated protein kinase 8 interacting protein 3          | -0.103 |
| 62078555  | MLLT11   | MLLT11, transcription factor 7 cofactor                           | -0.103 |
| 672035558 | NOVA2    | NOVA alternative splicing regulator 2                             | -0.103 |
| 149058216 | KIFAP3   | kinesin associated protein 3                                      | -0.102 |
| 71143096  | PCDHGC3  | protocadherin gamma subfamily C, 3                                | -0.102 |
| 156231065 | PHACTR1  | phosphatase and actin regulator 1                                 | -0.099 |
| 148699288 | N/A      | N/A                                                               | -0.099 |
| 149028085 | BAG6     | BCL2 associated athanogene 6                                      | -0.097 |
| 254281247 | EVL      | Enah/Vasp-like                                                    | -0.097 |
| 77404238  | GABBR1   | gamma-aminobutyric acid type B receptor subunit 1                 | -0.097 |
| 568963507 | MAP4     | microtubule associated protein 4                                  | -0.097 |
| 402534517 | EPB41L1  | erythrocyte membrane protein band 4.1 like 1                      | -0.096 |
| 149016331 | NCL      | nucleolin                                                         | -0.096 |
| 281340051 | N/A      | N/A                                                               | -0.096 |
| 77415383  | HSPA8    | heat shock protein family A (Hsp70) member 8                      | -0.090 |
| 674052018 | N/A      | N/A                                                               | -0.090 |
| 672050570 | N/A      | N/A                                                               | -0.090 |
| 744542371 | N/A      | N/A                                                               | -0.089 |
| 6981574   | SPARC    | secreted protein acidic and cysteine rich                         | -0.088 |
| 149025239 | VASH1    | vasohibin 1                                                       | -0.088 |
| 635067979 | N/A      | N/A                                                               | -0.085 |
| 884928897 | N/A      | N/A                                                               | -0.084 |
| 148747194 | SLC16A7  | solute carrier family 16 member 7                                 | -0.080 |
| 149029718 | ATP5F1B  | ATP synthase F1 subunit beta                                      | -0.076 |
| 148679159 | GNAO1    | G protein subunit alpha o1                                        | -0.072 |
| 149065907 | NPTXR    | neuronal pentraxin receptor                                       | -0.071 |
| 676282501 | N/A      | N/A                                                               | -0.071 |
| 672068312 | N/A      | N/A                                                               | -0.071 |

|           |              |                                                               |        |
|-----------|--------------|---------------------------------------------------------------|--------|
| 755472674 | N/A          | N/A                                                           | -0.064 |
| 731456449 | N/A          | N/A                                                           | -0.057 |
| 568935291 | EPHA5        | EPH receptor A5                                               | -0.055 |
| 29789269  | GRIA1        | glutamate ionotropic receptor AMPA type subunit 1             | -0.052 |
| 676279510 | N/A          | N/A                                                           | -0.052 |
| 11693176  | RPLP0        | ribosomal protein lateral stalk subunit P0                    | -0.051 |
| 586556217 | N/A          | N/A                                                           | -0.050 |
| 564378965 | N/A          | N/A                                                           | -0.047 |
| 149042205 | N/A          | N/A                                                           | -0.046 |
| 28189917  | Ubb          | ubiquitin B                                                   | -0.043 |
| 568931380 | CHD5         | chromodomain helicase DNA binding protein 5                   | -0.036 |
| 585192925 | N/A          | N/A                                                           | -0.036 |
| 6978673   | CNR1         | cannabinoid receptor 1                                        | -0.023 |
| 386869319 | LRRC75B      | leucine rich repeat containing 75B                            | -0.020 |
| 157820753 | MDGA1        | MAM domain containing glycosylphosphatidylinositol anchor 1   | -0.002 |
| 157823691 | SPOCK2       | SPARC/osteonectin, cwcv and kazal like domains proteoglycan 2 | 0.001  |
| 16758706  | NRXN2        | neurexin 2                                                    | 0.005  |
| 564327948 | JOSD2        | Josephin domain containing 2                                  | 0.037  |
| 672065610 | ZNF142       | zinc finger protein 142                                       | 0.047  |
| 148705576 | CRMP1        | collapsin response mediator protein 1                         | 0.048  |
| 31543764  | SPTAN1       | spectrin alpha, non-erythrocytic 1                            | 0.048  |
| 532003341 | N/A          | N/A                                                           | 0.050  |
| 20376820  | MFN1         | mitofusin 1                                                   | 0.052  |
| 9507011   | PTPRS        | protein tyrosine phosphatase, receptor type S                 | 0.052  |
| 803119291 | N/A          | N/A                                                           | 0.054  |
| 8393296   | EEF2         | eukaryotic translation elongation factor 2                    | 0.057  |
| 672013322 | LOC103689966 | MARCKS-related protein-like                                   | 0.059  |
| 998662027 | N/A          | N/A                                                           | 0.062  |
| 30017419  | NREP         | neuronal regeneration related protein                         | 0.063  |
| 803119291 | N/A          | N/A                                                           | 0.065  |
| 148674292 | NNAT         | neuronatin                                                    | 0.069  |
| 564339412 | LRRC40       | leucine rich repeat containing 40                             | 0.073  |
| 655660415 | N/A          | N/A                                                           | 0.074  |
| 12847552  | H3F3A/H3F3B  | H3 histone family member 3A                                   | 0.075  |
| 564354448 | AGRN         | agrin                                                         | 0.077  |
| 564358123 | MIDN         | midnolin                                                      | 0.080  |
| 672070615 | TTC3         | tetratricopeptide repeat domain 3                             | 0.081  |

|           |               |                                                         |       |
|-----------|---------------|---------------------------------------------------------|-------|
| 625258416 | N/A           | N/A                                                     | 0.081 |
| 488547912 | N/A           | N/A                                                     | 0.083 |
| 296491570 | N/A           | N/A                                                     | 0.084 |
| 880915307 | N/A           | N/A                                                     | 0.084 |
| 672047825 | N/A           | N/A                                                     | 0.084 |
| 829910413 | N/A           | N/A                                                     | 0.085 |
| 158749620 | MAP1B         | microtubule associated protein 1B                       | 0.089 |
| 30017437  | GPM6A         | glycoprotein M6A                                        | 0.092 |
| 207318    | TMSB10/TMSB4X | thymosin beta 4, X-linked                               | 0.092 |
| 537229315 | N/A           | N/A                                                     | 0.092 |
| 820973213 | N/A           | N/A                                                     | 0.092 |
| 149030791 | GPRASP1       | G protein-coupled receptor associated sorting protein 1 | 0.093 |
| 460838694 | Srrm2         | serine/arginine repetitive matrix 2                     | 0.096 |
| 208973284 | MAP9          | microtubule associated protein 9                        | 0.098 |
| 148691289 | TUBB          | tubulin beta class I                                    | 0.103 |
| 564386141 | ACIN1         | apoptotic chromatin condensation inducer 1              | 0.104 |
| 149059533 | NFIB          | nuclear factor I B                                      | 0.105 |
| 197252056 | MED1          | mediator complex subunit 1                              | 0.106 |
| 564356550 | PCNX1         | pecanex homolog 1                                       | 0.107 |
| 640823357 | N/A           | N/A                                                     | 0.107 |
| 403310686 | SOX4          | SRY-box 4                                               | 0.109 |
| 198278505 | RPL7          | ribosomal protein L7                                    | 0.111 |
| 155369307 | MTRF1         | mitochondrial fission regulator 1                       | 0.112 |
| 148698430 | N/A           | N/A                                                     | 0.112 |
| 744598167 | N/A           | N/A                                                     | 0.112 |
| 564301352 | PRRC2B        | proline rich coiled-coil 2B                             | 0.113 |
| 198278535 | TNC           | tenascin C                                              | 0.113 |
| 667481282 | N/A           | N/A                                                     | 0.113 |
| 158749559 | BSN           | bassoon presynaptic cytomatrix protein                  | 0.114 |
| 545838484 | N/A           | N/A                                                     | 0.118 |
| 672041858 | PKIA          | cAMP-dependent protein kinase inhibitor alpha           | 0.119 |
| 83267872  | ADNP          | activity dependent neuroprotector homeobox              | 0.123 |
| 50510427  | IP6K1         | inositol hexakisphosphate kinase 1                      | 0.123 |
| 27465617  | ABI2          | abl interactor 2                                        | 0.124 |
| 568939281 | FRY           | FRY microtubule binding protein                         | 0.124 |
| 189163518 | MBOAT2        | membrane bound O-acyltransferase domain containing 2    | 0.125 |
| 585165276 | N/A           | N/A                                                     | 0.127 |
| 564390508 | NSD1          | nuclear receptor binding SET domain protein 1           | 0.128 |

|           |         |                                                     |       |
|-----------|---------|-----------------------------------------------------|-------|
| 300795060 | SRGAP3  | SLIT-ROBO Rho GTPase activating protein 3           | 0.128 |
| 179074    | SRSF1   | serine and arginine rich splicing factor 1          | 0.129 |
| 201066348 | PEAR1   | platelet endothelial aggregation receptor 1         | 0.131 |
| 18041977  | Serbp1  | Serpine1 mRNA binding protein 1                     | 0.132 |
| 241666404 | EPHA4   | EPH receptor A4                                     | 0.133 |
| 8394158   | FASN    | fatty acid synthase                                 | 0.133 |
| 283837871 | LRP1    | LDL receptor related protein 1                      | 0.133 |
| 312836802 | SPAG9   | sperm associated antigen 9                          | 0.133 |
| 242397499 | DCHS1   | dachsous cadherin-related 1                         | 0.134 |
| 158631164 | IGSF3   | immunoglobulin superfamily member 3                 | 0.134 |
| 33636726  | SERINC1 | serine incorporator 1                               | 0.134 |
| 332245592 | N/A     | N/A                                                 | 0.134 |
| 821013078 | N/A     | N/A                                                 | 0.134 |
| 115312278 | MECP2   | methyl-CpG binding protein 2                        | 0.135 |
| 998662027 | N/A     | N/A                                                 | 0.135 |
| 672038527 | PLEKHA1 | pleckstrin homology domain containing A1            | 0.136 |
| 564353622 | UBR4    | ubiquitin protein ligase E3 component n-recognin 4  | 0.136 |
| 672055431 | SPAST   | spastin                                             | 0.138 |
| 924859455 | NEXMIF  | neurite extension and migration factor              | 0.139 |
| 171543899 | PLXNA4  | plexin A4                                           | 0.139 |
| 300390195 | Akap9   | A kinase (PRKA) anchor protein (yotiao) 9           | 0.141 |
| 213511844 | ALG2    | ALG2, alpha-1,3/1,6-mannosyltransferase             | 0.141 |
| 281371335 | WDR6    | WD repeat domain 6                                  | 0.141 |
| 60359872  | G3BP1   | G3BP stress granule assembly factor 1               | 0.142 |
| 672041947 | ZNF704  | zinc finger protein 704                             | 0.143 |
| 157819885 | SETD5   | SET domain containing 5                             | 0.144 |
| 149066497 | Ubr5    | ubiquitin protein ligase E3 component n-recognin 5  | 0.144 |
| 564363346 | BCL9L   | B cell CLL/lymphoma 9 like                          | 0.145 |
| 149040413 | GPAM    | glycerol-3-phosphate acyltransferase, mitochondrial | 0.145 |
| 198442895 | STOX2   | storkhead box 2                                     | 0.146 |
| 58865862  | XKR4    | XK related 4                                        | 0.146 |
| 149027694 | N/A     | N/A                                                 | 0.148 |
| 672055757 | N/A     | N/A                                                 | 0.149 |
| 404312698 | CASC4   | cancer susceptibility 4                             | 0.150 |
| 56605726  | EIF4B   | eukaryotic translation initiation factor 4B         | 0.150 |
| 686661085 | MTMR4   | myotubularin related protein 4                      | 0.152 |
| 26023947  | NRP1    | neuropilin 1                                        | 0.152 |

|           |               |                                                                       |       |
|-----------|---------------|-----------------------------------------------------------------------|-------|
| 564359927 | RIMS2         | regulating synaptic membrane exocytosis 2                             | 0.152 |
| 564358968 | N/A           | N/A                                                                   | 0.152 |
| 157817412 | ARID1A        | AT-rich interaction domain 1A                                         | 0.153 |
| 728864372 | WDFY3         | WD repeat and FYVE domain containing 3                                | 0.153 |
| 625183267 | N/A           | N/A                                                                   | 0.155 |
| 274327131 | GCN1          | GCN1, eIF2 alpha kinase activator homolog                             | 0.156 |
| 586975096 | N/A           | N/A                                                                   | 0.157 |
| 119582941 | ZFAND5        | zinc finger AN1-type containing 5                                     | 0.158 |
| 167555091 | CTTNBP2       | cortactin binding protein 2                                           | 0.159 |
| 672053016 | LOC691387     | similar to HBxAg transactivated protein 2                             | 0.159 |
| 197246909 | PHC2          | polyhomeotic homolog 2                                                | 0.159 |
| 59709464  | PIK3R2        | phosphoinositide-3-kinase regulatory subunit 2                        | 0.159 |
| 300793740 | TANC2         | tetratricopeptide repeat, ankyrin repeat and coiled-coil containing 2 | 0.160 |
| 26006223  | FBXO21        | F-box protein 21                                                      | 0.161 |
| 829969914 | N/A           | N/A                                                                   | 0.162 |
| 4506681   | RPS11         | ribosomal protein S11                                                 | 0.163 |
| 27545420  | TAOK1         | TAO kinase 1                                                          | 0.163 |
| 10720132  | NEO1          | neogenin 1                                                            | 0.164 |
| 672038248 | SMG1          | SMG1, nonsense mediated mRNA decay associated PI3K related kinase     | 0.165 |
| 672017116 | N/A           | N/A                                                                   | 0.166 |
| 19745186  | CREB1         | cAMP responsive element binding protein 1                             | 0.167 |
| 24418849  | KCNB1         | potassium voltage-gated channel subfamily B member 1                  | 0.167 |
| 145312253 | REV3L         | REV3 like, DNA directed polymerase zeta catalytic subunit             | 0.168 |
| 564325173 | N/A           | N/A                                                                   | 0.168 |
| 157822563 | AREL1         | apoptosis resistant E3 ubiquitin protein ligase 1                     | 0.169 |
| 564327171 | ACTN4         | actinin alpha 4                                                       | 0.170 |
| 16758310  | LRP3          | LDL receptor related protein 3                                        | 0.170 |
| 157821103 | PITPNM2       | phosphatidylinositol transfer protein membrane associated 2           | 0.170 |
| 672056431 | ZC3H14        | zinc finger CCCH-type containing 14                                   | 0.170 |
| 564396111 | ZCCHC14       | zinc finger CCHC-type containing 14                                   | 0.170 |
| 672044124 | N/A           | N/A                                                                   | 0.170 |
| 349501022 | 2410002F23Rik | RIKEN cDNA 2410002F23 gene                                            | 0.171 |
| 293346096 | FAM171B       | family with sequence similarity 171 member B                          | 0.171 |
| 568938931 | TRRAP         | transformation/transcription domain associated protein                | 0.171 |

|           |          |                                                               |       |
|-----------|----------|---------------------------------------------------------------|-------|
| 60359854  | POLDIP3  | DNA polymerase delta interacting protein 3                    | 0.173 |
| 148689279 | RBM5     | RNA binding motif protein 5                                   | 0.173 |
| 13591904  | ADAR     | adenosine deaminase, RNA specific                             | 0.174 |
| 149054120 | ORMDL3   | ORMDL sphingolipid biosynthesis regulator 3                   | 0.174 |
| 20301990  | Podxl    | podocalyxin-like                                              | 0.175 |
| 564353232 | PUM1     | pumilio RNA binding family member 1                           | 0.175 |
| 697993427 | TPR      | translocated promoter region, nuclear basket protein          | 0.175 |
| 224451084 | GPSM1    | G protein signaling modulator 1                               | 0.176 |
| 408387590 | TRIP12   | thyroid hormone receptor interactor 12                        | 0.176 |
| 392347634 | CHD4     | chromodomain helicase DNA binding protein 4                   | 0.177 |
| 162287391 | RPL6     | ribosomal protein L6                                          | 0.177 |
| 672081765 | N/A      | N/A                                                           | 0.177 |
| 6978787   | DYRK1A   | dual specificity tyrosine phosphorylation regulated kinase 1A | 0.179 |
| 23263334  | LZTS1    | leucine zipper tumor suppressor 1                             | 0.179 |
| 795554188 | N/A      | N/A                                                           | 0.179 |
| 148698133 | AHDC1    | AT-hook DNA binding motif containing 1                        | 0.180 |
| 674066860 | N/A      | N/A                                                           | 0.180 |
| 189217530 | ANAPC2   | anaphase promoting complex subunit 2                          | 0.181 |
| 157819257 | Ubxn7    | UBX domain protein 7                                          | 0.181 |
| 157821015 | KDM5B    | lysine demethylase 5B                                         | 0.182 |
| 148706565 | N/A      | N/A                                                           | 0.182 |
| 6981632   | CNTN2    | contactin 2                                                   | 0.183 |
| 197384571 | UBA2     | ubiquitin like modifier activating enzyme 2                   | 0.184 |
| 187469679 | LDB1     | LIM domain binding 1                                          | 0.185 |
| 149026331 | SRSF11   | serine and arginine rich splicing factor 11                   | 0.185 |
| 148696021 | N/A      | N/A                                                           | 0.185 |
| 755499467 | PPP1R16B | protein phosphatase 1 regulatory subunit 16B                  | 0.186 |
| 42627759  | SMC3     | structural maintenance of chromosomes 3                       | 0.186 |
| 60360108  | BRD2     | bromodomain containing 2                                      | 0.188 |
| 164663913 | HELZ     | helicase with zinc finger                                     | 0.188 |
| 564365520 | USP19    | ubiquitin specific peptidase 19                               | 0.188 |
| 674086663 | N/A      | N/A                                                           | 0.189 |
| 6981458   | RAF1     | Raf-1 proto-oncogene, serine/threonine kinase                 | 0.190 |
| 203097404 | ZNF266   | zinc finger protein 266                                       | 0.190 |
| 672034032 | N/A      | N/A                                                           | 0.190 |
| 404351649 | CDK13    | cyclin dependent kinase 13                                    | 0.191 |
| 109506395 | FAM53C   | family with sequence similarity 53 member C                   | 0.191 |
| 564399456 | TSPYL2   | TSPY like 2                                                   | 0.191 |

|           |          |                                                            |       |
|-----------|----------|------------------------------------------------------------|-------|
| 672016550 | RAPGEF1  | Rap guanine nucleotide exchange factor 1                   | 0.192 |
| 149049603 | ADIPOR2  | adiponectin receptor 2                                     | 0.194 |
| 300797788 | DHX15    | DEAH-box helicase 15                                       | 0.195 |
| 21326463  | SIPA1L1  | signal induced proliferation associated 1 like 1           | 0.195 |
| 157820255 | MED13    | mediator complex subunit 13                                | 0.196 |
| 71043930  | Ppip5k2  | diphosphoinositol pentakisphosphate kinase 2               | 0.196 |
| 6678315   | TSC22D1  | TSC22 domain family member 1                               | 0.196 |
| 28972113  | AVL9     | AVL9 cell migration associated                             | 0.197 |
| 564389291 | PCM1     | pericentriolar material 1                                  | 0.198 |
| 758818575 | Peg3     | paternally expressed 3                                     | 0.198 |
| 61556748  | TSPYL1   | TSPY like 1                                                | 0.198 |
| 564388185 | ERCC6    | ERCC excision repair 6, chromatin remodeling factor        | 0.200 |
| 71067095  | GON4L    | gon-4 like                                                 | 0.200 |
| 213417659 | KITLG    | KIT ligand                                                 | 0.200 |
| 119616373 | MEF2C    | myocyte enhancer factor 2C                                 | 0.200 |
| 564400602 | STAG2    | stromal antigen 2                                          | 0.200 |
| 148702008 | N/A      | N/A                                                        | 0.200 |
| 199561113 | ZMYM3    | zinc finger MYM-type containing 3                          | 0.201 |
| 157819431 | BRD3     | bromodomain containing 3                                   | 0.202 |
| 291042494 | MED13L   | mediator complex subunit 13 like                           | 0.202 |
| 521020666 | N/A      | N/A                                                        | 0.202 |
| 672042964 | ASH1L    | ASH1 like histone lysine methyltransferase                 | 0.203 |
| 157820711 | Foxn3    | forkhead box N3                                            | 0.203 |
| 157819149 | CUL4B    | cullin 4B                                                  | 0.204 |
| 564321656 | TCF25    | transcription factor 25                                    | 0.204 |
| 29789299  | XPO1     | exportin 1                                                 | 0.204 |
| 13928696  | JAK2     | Janus kinase 2                                             | 0.206 |
| 425384    | CAMK4    | calcium/calmodulin dependent protein kinase IV             | 0.207 |
| 157824032 | Ptprt    | protein tyrosine phosphatase, receptor type, T             | 0.208 |
| 157821923 | SLCO5A1  | solute carrier organic anion transporter family member 5A1 | 0.209 |
| 157822303 | GPR107   | G protein-coupled receptor 107                             | 0.212 |
| 208022685 | IARS     | isoleucyl-tRNA synthetase                                  | 0.212 |
| 189491614 | SLC25A46 | solute carrier family 25 member 46                         | 0.212 |
| 9910320   | TENM2    | teneurin transmembrane protein 2                           | 0.212 |
| 30061483  | HAP1     | huntingtin associated protein 1                            | 0.213 |
| 6981264   | NF1      | neurofibromin 1                                            | 0.213 |
| 19705483  | CLSTN2   | calsyntenin 2                                              | 0.214 |

|           |          |                                                                        |       |
|-----------|----------|------------------------------------------------------------------------|-------|
| 169259769 | ZNF292   | zinc finger protein 292                                                | 0.214 |
| 171846592 | GPBP1    | GC-rich promoter binding protein 1                                     | 0.215 |
| 62088168  | ELAVL2   | ELAV like RNA binding protein 2                                        | 0.216 |
| 189163477 | SCAF4    | SR-related CTD associated factor 4                                     | 0.216 |
| 564367958 | SEMA4C   | semaphorin 4C                                                          | 0.216 |
| 831218355 | N/A      | N/A                                                                    | 0.216 |
| 157819275 | SMURF1   | SMAD specific E3 ubiquitin protein ligase 1                            | 0.217 |
| 564347477 | ZNF638   | zinc finger protein 638                                                | 0.217 |
| 149069422 | RPL7L1   | ribosomal protein L7 like 1                                            | 0.218 |
| 564386027 | CHD8     | chromodomain helicase DNA binding protein 8                            | 0.219 |
| 149031601 | Hist1h1c | histone cluster 1 H1 family member c                                   | 0.219 |
| 2804296   | CDH8     | cadherin 8                                                             | 0.221 |
| 564298823 | EML3     | echinoderm microtubule associated protein like 3                       | 0.221 |
| 148680747 | ANKFY1   | ankyrin repeat and FYVE domain containing 1                            | 0.222 |
| 928135679 | GAN      | gigaxonin                                                              | 0.222 |
| 114145788 | NAA25    | N(alpha)-acetyltransferase 25, NatB auxiliary subunit                  | 0.222 |
| 30024612  | SOX11    | SRY-box 11                                                             | 0.222 |
| 564361244 | TCF20    | transcription factor 20                                                | 0.222 |
| 149054141 | CASC3    | cancer susceptibility 3                                                | 0.223 |
| 157818273 | CDC42EP4 | CDC42 effector protein 4                                               | 0.223 |
| 148702333 | DDX42    | DEAD-box helicase 42                                                   | 0.223 |
| 392333209 | DLG5     | discs large MAGUK scaffold protein 5                                   | 0.223 |
| 724804431 | N/A      | N/A                                                                    | 0.223 |
| 672076339 | RBPJ     | recombination signal binding protein for immunoglobulin kappa J region | 0.224 |
| 281371443 | CASTOR2  | cytosolic arginine sensor for mTORC1 subunit 2                         | 0.225 |
| 148491097 | DYNC1H1  | dynein cytoplasmic 1 heavy chain 1                                     | 0.225 |
| 13928850  | PHGDH    | phosphoglycerate dehydrogenase                                         | 0.225 |
| 157819757 | RNF182   | ring finger protein 182                                                | 0.225 |
| 62087776  | SYNCRIP  | synaptotagmin binding cytoplasmic RNA interacting protein              | 0.225 |
| 823419445 | N/A      | N/A                                                                    | 0.225 |
| 529367218 | Abca8a   | ATP-binding cassette, sub-family A (ABC1), member 8a                   | 0.226 |
| 13540699  | NRP2     | neuropilin 2                                                           | 0.226 |
| 6981636   | TCF12    | transcription factor 12                                                | 0.226 |
| 112984440 | TNFRSF19 | TNF receptor superfamily member 19                                     | 0.226 |



|           |         |                                                     |       |
|-----------|---------|-----------------------------------------------------|-------|
| 76096354  | ARFGAP2 | ADP ribosylation factor GTPase activating protein 2 | 0.227 |
| 564344160 | CHD6    | chromodomain helicase DNA binding protein 6         | 0.227 |
| 157819605 | EPC2    | enhancer of polycomb homolog 2                      | 0.227 |
| 403310688 | USP24   | ubiquitin specific peptidase 24                     | 0.227 |
| 392348740 | LAMB1   | laminin subunit beta 1                              | 0.228 |
| 403420604 | PCDH11X | protocadherin 11 X-linked                           | 0.228 |
| 672072009 | Zfp68   | zinc finger protein 68                              | 0.228 |
| 731286412 | N/A     | N/A                                                 | 0.229 |
| 440909886 | N/A     | N/A                                                 | 0.229 |
| 17864836  | CACNA1C | calcium voltage-gated channel subunit alpha 1 C     | 0.230 |
| 157817961 | PHF3    | PHD finger protein 3                                | 0.230 |
| 11177894  | TSC1    | TSC complex subunit 1                               | 0.230 |
| 672087260 | N/A     | N/A                                                 | 0.230 |
| 145553966 | CACNA1E | calcium voltage-gated channel subunit alpha 1 E     | 0.231 |
| 392351663 | GPATCH8 | G-patch domain containing 8                         | 0.231 |
| 157818545 | ZNF316  | zinc finger protein 316                             | 0.231 |
| 149031313 | N/A     | N/A                                                 | 0.231 |
| 157817873 | ANKRD12 | ankyrin repeat domain 12                            | 0.232 |
| 61557491  | TMEM263 | transmembrane protein 263                           | 0.232 |
| 913500911 | N/A     | N/A                                                 | 0.232 |
| 672084956 | N/A     | N/A                                                 | 0.232 |
| 157821429 | BAZ2A   | bromodomain adjacent to zinc finger domain 2A       | 0.233 |
| 564353949 | N/A     | N/A                                                 | 0.233 |
| 564381925 | ACKR1   | atypical chemokine receptor 1 (Duffy blood group)   | 0.234 |
| 19923674  | PAM     | peptidylglycine alpha-amidating monooxygenase       | 0.234 |
| 564383487 | SLAIN2  | SLAIN motif family member 2                         | 0.234 |
| 641717602 | N/A     | N/A                                                 | 0.234 |
| 68163459  | JOSD1   | Josephin domain containing 1                        | 0.235 |
| 149016025 | N/A     | N/A                                                 | 0.235 |
| 213972547 | KAT6A   | lysine acetyltransferase 6A                         | 0.236 |
| 293341411 | Rc3h1   | ring finger and CCCH-type domains 1                 | 0.237 |
| 2266994   | OGT     | O-linked N-acetylglucosamine (GlcNAc) transferase   | 0.238 |
| 58865776  | TRIM32  | tripartite motif containing 32                      | 0.238 |
| 14091754  | GRIP1   | glutamate receptor interacting protein 1            | 0.239 |
| 297681940 | N/A     | N/A                                                 | 0.239 |

|           |                 |                                                                              |       |
|-----------|-----------------|------------------------------------------------------------------------------|-------|
| 564334521 | CACUL1          | CDK2 associated cullin domain 1                                              | 0.240 |
| 37360004  | KDM1A           | lysine demethylase 1A                                                        | 0.240 |
| 62656582  | KIAA0100        | KIAA0100                                                                     | 0.240 |
| 537233715 | N/A             | N/A                                                                          | 0.240 |
| 456367248 | ARFGEF1         | ADP ribosylation factor guanine nucleotide exchange factor 1                 | 0.241 |
| 672071650 | N/A             | N/A                                                                          | 0.241 |
| 403310691 | RAI1            | retinoic acid induced 1                                                      | 0.242 |
| 62087532  | SRSF6           | serine and arginine rich splicing factor 6                                   | 0.242 |
| 148697254 | TBL1X           | transducin beta like 1 X-linked                                              | 0.243 |
| 300797458 | UBE3A           | ubiquitin protein ligase E3A                                                 | 0.243 |
| 187282338 | Zfp955a/Zfp955b | zinc finger protein 955B                                                     | 0.243 |
| 859770113 | N/A             | N/A                                                                          | 0.244 |
| 966923099 | SMG7            | SMG7, nonsense mediated mRNA decay factor                                    | 0.245 |
| 62078579  | NUB1            | negative regulator of ubiquitin like proteins 1                              | 0.247 |
| 149067682 | HSD3B7          | hydroxy-delta-5-steroid dehydrogenase, 3 beta- and steroid delta-isomerase 7 | 0.248 |
| 403310660 | LATS1           | large tumor suppressor kinase 1                                              | 0.248 |
| 672022994 | NEO1            | neogenin 1                                                                   | 0.248 |
| 149034059 | CDH4            | cadherin 4                                                                   | 0.249 |
| 37360236  | SMG5            | SMG5, nonsense mediated mRNA decay factor                                    | 0.249 |
| 157823639 | PPP1R13B        | protein phosphatase 1 regulatory subunit 13B                                 | 0.250 |
| 167234435 | EML4            | echinoderm microtubule associated protein like 4                             | 0.251 |
| 157820119 | LRRTM1          | leucine rich repeat transmembrane neuronal 1                                 | 0.251 |
| 80751171  | PCDHGA10        | protocadherin gamma subfamily A, 10                                          | 0.251 |
| 674077166 | N/A             | N/A                                                                          | 0.251 |
| 61097926  | RYK             | receptor-like tyrosine kinase                                                | 0.252 |
| 564329093 | TM6SF1          | transmembrane 6 superfamily member 1                                         | 0.252 |
| 149058465 | ZBTB41          | zinc finger and BTB domain containing 41                                     | 0.252 |
| 12831217  | GPR27           | G protein-coupled receptor 27                                                | 0.253 |
| 293343541 | ICE1            | interactor of little elongation complex ELL subunit 1                        | 0.253 |
| 148671090 | LSM14A          | LSM14A, mRNA processing body assembly factor                                 | 0.253 |
| 537151504 | N/A             | N/A                                                                          | 0.253 |
| 396080328 | ADCYAP1R1       | ADCYAP receptor type I                                                       | 0.255 |
| 155369656 | AQR             | aquarius intron-binding spliceosomal factor                                  | 0.255 |
| 290560930 | CREBBP          | CREB binding protein                                                         | 0.255 |
| 564383236 | YTHDC1          | YTH domain containing 1                                                      | 0.255 |

|           |           |                                                              |       |
|-----------|-----------|--------------------------------------------------------------|-------|
| 672035849 | N/A       | N/A                                                          | 0.255 |
| 157822191 | MTMR2     | myotubularin related protein 2                               | 0.256 |
| 67078454  | SLC25A51  | solute carrier family 25 member 51                           | 0.256 |
| 71043896  | FEM1A     | fem-1 homolog A                                              | 0.257 |
| 57527570  | LRRC41    | leucine rich repeat containing 41                            | 0.257 |
| 157818967 | KDM6B     | lysine demethylase 6B                                        | 0.258 |
| 672026416 | PRR36     | proline rich 36                                              | 0.258 |
| 166157456 | PPP4R2    | protein phosphatase 4 regulatory subunit 2                   | 0.259 |
| 431911661 | N/A       | N/A                                                          | 0.259 |
| 564316243 | CEP170    | centrosomal protein 170                                      | 0.261 |
| 564333160 | TMEM2     | transmembrane protein 2                                      | 0.261 |
| 545215595 | N/A       | N/A                                                          | 0.262 |
| 672040416 | N/A       | N/A                                                          | 0.262 |
| 403310664 | KMT2E     | lysine methyltransferase 2E                                  | 0.263 |
| 149065851 | XPNPEP3   | X-prolyl aminopeptidase 3                                    | 0.263 |
| 926691741 | N/A       | N/A                                                          | 0.263 |
| 537216032 | N/A       | N/A                                                          | 0.263 |
| 71361653  | STRN3     | striatin 3                                                   | 0.264 |
| 157820313 | GIGYF1    | GRB10 interacting GYF protein 1                              | 0.265 |
| 564315812 | NAV1      | neuron navigator 1                                           | 0.265 |
| 293340917 | C3orf70   | chromosome 3 open reading frame 70                           | 0.266 |
| 51948482  | DEK       | DEK proto-oncogene                                           | 0.266 |
| 12018256  | ECH1      | enoyl-CoA hydratase 1                                        | 0.266 |
| 625182285 | N/A       | N/A                                                          | 0.266 |
| 154426327 | KANSL2    | KAT8 regulatory NSL complex subunit 2                        | 0.267 |
| 48040531  | RNF114    | ring finger protein 114                                      | 0.267 |
| 537273922 | N/A       | N/A                                                          | 0.267 |
| 300796412 | ATMIN     | ATM interactor                                               | 0.268 |
| 392332910 | TP53BP2   | tumor protein p53 binding protein 2                          | 0.268 |
| 84781684  | ZNF207    | zinc finger protein 207                                      | 0.268 |
| 464391331 | KDM5A     | lysine demethylase 5A                                        | 0.269 |
| 164565360 | CTTNBP2NL | CTTNBP2 N-terminal like                                      | 0.271 |
| 66911118  | NFX1      | nuclear transcription factor, X-box binding 1                | 0.271 |
| 6678349   | TIAL1     | TIA1 cytotoxic granule associated RNA binding protein like 1 | 0.271 |
| 672055562 | LBH       | limb bud and heart development                               | 0.272 |
| 564350633 | SLC35A1   | solute carrier family 35 member A1                           | 0.272 |
| 568977804 | ATAD2B    | ATPase family, AAA domain containing 2B                      | 0.273 |
| 348605217 | SENP6     | SUMO1/sentrin specific peptidase 6                           | 0.273 |
| 4885579   | CNOT9     | CCR4-NOT transcription complex subunit 9                     | 0.274 |

|           |         |                                                          |       |
|-----------|---------|----------------------------------------------------------|-------|
| 9506755   | GRIK2   | glutamate ionotropic receptor kainate type subunit 2     | 0.274 |
| 157820491 | SESN1   | sestrin 1                                                | 0.274 |
| 392337823 | RSF1    | remodeling and spacing factor 1                          | 0.275 |
| 564368081 | REV1    | REV1, DNA directed polymerase                            | 0.276 |
| 748983435 | VEZF1   | vascular endothelial zinc finger 1                       | 0.276 |
| 300796674 | TRANK1  | tetratricopeptide repeat and ankyrin repeat containing 1 | 0.277 |
| 300797562 | BCOR    | BCL6 corepressor                                         | 0.278 |
| 62078991  | Rsrc2   | arginine/serine-rich coiled-coil 2                       | 0.278 |
| 149032040 | SLC11A2 | solute carrier family 11 member 2                        | 0.278 |
| 27465559  | BRINP2  | BMP/retinoic acid inducible neural specific 2            | 0.279 |
| 157820199 | ZNF358  | zinc finger protein 358                                  | 0.279 |
| 40254779  | EFNB1   | ephrin B1                                                | 0.280 |
| 568930638 | HSPG2   | heparan sulfate proteoglycan 2                           | 0.280 |
| 281371328 | PTPN4   | protein tyrosine phosphatase, non-receptor type 4        | 0.280 |
| 50511177  | SLITRK1 | SLIT and NTRK like family member 1                       | 0.281 |
| 300793780 | ZNF251  | zinc finger protein 251                                  | 0.281 |
| 300797978 | FLNC    | filamin C                                                | 0.282 |
| 309951113 | USPL1   | ubiquitin specific peptidase like 1                      | 0.282 |
| 672022657 | N/A     | N/A                                                      | 0.282 |
| 11067415  | ERBB4   | erb-b2 receptor tyrosine kinase 4                        | 0.283 |
| 28972858  | VCPIP1  | valosin containing protein interacting protein 1         | 0.283 |
| 34877176  | GPRIN2  | G protein regulated inducer of neurite outgrowth 2       | 0.284 |
| 955485868 | N/A     | N/A                                                      | 0.285 |
| 157819499 | ANKRD17 | ankyrin repeat domain 17                                 | 0.286 |
| 564353880 | DDI2    | DNA damage inducible 1 homolog 2                         | 0.286 |
| 148673748 | FAM110B | family with sequence similarity 110 member B             | 0.286 |
| 300794761 | Fat4    | FAT atypical cadherin 4                                  | 0.286 |
| 52138617  | YME1L1  | YME1 like 1 ATPase                                       | 0.286 |
| 40018556  | NOB1    | NIN1/PSMD8 binding protein 1 homolog                     | 0.287 |
| 672053718 | N/A     | N/A                                                      | 0.287 |
| 19924085  | FAT3    | FAT atypical cadherin 3                                  | 0.288 |
| 56090389  | INTS14  | integrator complex subunit 14                            | 0.288 |
| 672045624 | MARCH7  | membrane associated ring-CH-type finger 7                | 0.288 |
| 149048628 | MYNN    | myoneurin                                                | 0.288 |
| 13928966  | HSF2    | heat shock transcription factor 2                        | 0.289 |
| 164565364 | ITPKB   | inositol-trisphosphate 3-kinase B                        | 0.289 |

|           |         |                                                                         |       |
|-----------|---------|-------------------------------------------------------------------------|-------|
| 157821413 | USP30   | ubiquitin specific peptidase 30                                         | 0.289 |
| 13928842  | ZNF148  | zinc finger protein 148                                                 | 0.289 |
| 827475660 | EPC1    | enhancer of polycomb homolog 1                                          | 0.290 |
| 300794743 | TSC22D2 | TSC22 domain family member 2                                            | 0.290 |
| 564333920 | PPRC1   | peroxisome proliferator-activated receptor gamma, coactivator-related 1 | 0.292 |
| 564364877 | TBC1D2B | TBC1 domain family member 2B                                            | 0.292 |
| 672051957 | N/A     | N/A                                                                     | 0.292 |
| 68534262  | C1orf43 | chromosome 1 open reading frame 43                                      | 0.293 |
| 29789319  | CBLB    | Cbl proto-oncogene B                                                    | 0.293 |
| 162951835 | CYTH1   | cytohesin 1                                                             | 0.293 |
| 157819315 | OSBPL11 | oxysterol binding protein like 11                                       | 0.293 |
| 149060466 | ZBTB20  | zinc finger and BTB domain containing 20                                | 0.293 |
| 584052040 | N/A     | N/A                                                                     | 0.293 |
| 149065426 | CASP2   | caspase 2                                                               | 0.294 |
| 568992461 | DIP2B   | disco interacting protein 2 homolog B                                   | 0.294 |
| 568992461 | DIP2B   | disco interacting protein 2 homolog B                                   | 0.294 |
| 672073809 | N/A     | N/A                                                                     | 0.296 |
| 635017744 | N/A     | N/A                                                                     | 0.296 |
| 672046069 | SP3     | Sp3 transcription factor                                                | 0.297 |
| 569005738 | KDM2A   | lysine demethylase 2A                                                   | 0.298 |
| 149045074 | NUP153  | nucleoporin 153                                                         | 0.298 |
| 58865780  | ZBTB17  | zinc finger and BTB domain containing 17                                | 0.300 |
| 148699086 | ZDHHC21 | zinc finger DHHC-type containing 21                                     | 0.300 |
| 149067383 | PRDM4   | PR/SET domain 4                                                         | 0.301 |
| 300797915 | Rbm33   | RNA binding motif protein 33                                            | 0.301 |
| 564344738 | N/A     | N/A                                                                     | 0.301 |
| 156627555 | NT5C3B  | 5'-nucleotidase, cytosolic IIIB                                         | 0.302 |
| 672052418 | N/A     | N/A                                                                     | 0.302 |
| 827475647 | OSBPL8  | oxysterol binding protein like 8                                        | 0.303 |
| 564382848 | Hnrnpdl | heterogeneous nuclear ribonucleoprotein D-like                          | 0.304 |
| 672043577 | Rprd2   | regulation of nuclear pre-mRNA domain containing 2                      | 0.304 |
| 149053570 | WSB1    | WD repeat and SOCS box containing 1                                     | 0.304 |
| 124249254 | ZNF639  | zinc finger protein 639                                                 | 0.304 |
| 109490297 | ABCA3   | ATP binding cassette subfamily A member 3                               | 0.305 |
| 13929168  | FAT1    | FAT atypical cadherin 1                                                 | 0.305 |
| 672082027 | N/A     | N/A                                                                     | 0.305 |
| 564364873 | ADAMTS7 | ADAM metallopeptidase with thrombospondin type 1 motif 7                | 0.306 |

|           |          |                                                                |       |
|-----------|----------|----------------------------------------------------------------|-------|
| 6978755   | DCC      | DCC netrin 1 receptor                                          | 0.306 |
| 755548135 | SPATA13  | spermatogenesis associated 13                                  | 0.306 |
| 149024675 | N/A      | N/A                                                            | 0.307 |
| 157818041 | YEATS2   | YEATS domain containing 2                                      | 0.309 |
| 404351667 | BOD1     | biorientation of chromosomes in cell division 1                | 0.310 |
| 392340053 | FRMD4B   | FERM domain containing 4B                                      | 0.310 |
| 755566493 | LRCH2    | leucine rich repeats and calponin homology domain containing 2 | 0.310 |
| 171916115 | LRRC55   | leucine rich repeat containing 55                              | 0.310 |
| 264681499 | Ddx3     | DEAD (Asp-Glu-Ala-Asp) box polypeptide 3                       | 0.311 |
| 270483881 | CBFA2T2  | CBFA2/RUNX1 translocation partner 2                            | 0.312 |
| 392333169 | CCDC88A  | coiled-coil domain containing 88A                              | 0.313 |
| 157822027 | CSRNP2   | cysteine and serine rich nuclear protein 2                     | 0.313 |
| 157819449 | ZBTB11   | zinc finger and BTB domain containing 11                       | 0.313 |
| 564353506 | ZNF436   | zinc finger protein 436                                        | 0.313 |
| 859858910 | N/A      | N/A                                                            | 0.313 |
| 1334149   | N/A      | N/A                                                            | 0.314 |
| 13786132  | Acot1    | acyl-CoA thioesterase 1                                        | 0.316 |
| 50510655  | PCF11    | PCF11 cleavage and polyadenylation factor subunit              | 0.316 |
| 672016634 | GAPVD1   | GTPase activating protein and VPS9 domains 1                   | 0.317 |
| 14091779  | Chn2     | chimerin 2                                                     | 0.318 |
| 61557316  | ST3GAL1  | ST3 beta-galactoside alpha-2,3-sialyltransferase 1             | 0.318 |
| 157819279 | TNPO3    | transportin 3                                                  | 0.318 |
| 149023886 | N/A      | N/A                                                            | 0.318 |
| 157818691 | YTHDF3   | YTH N6-methyladenosine RNA binding protein 3                   | 0.319 |
| 293341722 | N/A      | N/A                                                            | 0.319 |
| 149067028 | Ppp1r12a | protein phosphatase 1, regulatory subunit 12A                  | 0.320 |
| 149031125 | APMAP    | adipocyte plasma membrane associated protein                   | 0.321 |
| 148681067 | VASH2    | vasohibin 2                                                    | 0.321 |
| 344249173 | N/A      | N/A                                                            | 0.321 |
| 564335225 | MIER3    | MIER family member 3                                           | 0.323 |
| 30842813  | SLC38A2  | solute carrier family 38 member 2                              | 0.323 |
| 564298767 | N/A      | N/A                                                            | 0.323 |
| 157821303 | PPP4R3B  | protein phosphatase 4 regulatory subunit 3B                    | 0.324 |
| 157823419 | PRAG1    | PEAK1 related, kinase-activating pseudokinase 1                | 0.324 |
| 672035060 | CIC      | capicua transcriptional repressor                              | 0.325 |

|           |          |                                                                                                                 |       |
|-----------|----------|-----------------------------------------------------------------------------------------------------------------|-------|
| 564371471 | CLINT1   | clathrin interactor 1                                                                                           | 0.325 |
| 672078533 | N/A      | N/A                                                                                                             | 0.325 |
| 958729596 | N/A      | N/A                                                                                                             | 0.325 |
| 672039306 | RCOR2    | REST corepressor 2                                                                                              | 0.326 |
| 672072366 | N/A      | N/A                                                                                                             | 0.326 |
| 564370219 | LPIN2    | lipin 2                                                                                                         | 0.327 |
| 149067244 | SCYL2    | SCY1 like pseudokinase 2                                                                                        | 0.329 |
| 50866     | SMARCAD1 | SWI/SNF-related, matrix-associated actin-dependent regulator of chromatin, subfamily a, containing DEAD/H box 1 | 0.329 |
| 40018600  | CNPPD1   | cyclin Pas1/PHO80 domain containing 1                                                                           | 0.330 |
| 149021415 | SNX25    | sorting nexin 25                                                                                                | 0.330 |
| 344239802 | N/A      | N/A                                                                                                             | 0.330 |
| 149050659 | BIRC6    | baculoviral IAP repeat containing 6                                                                             | 0.331 |
| 512983752 | N/A      | N/A                                                                                                             | 0.332 |
| 564330111 | NUP98    | nucleoporin 98                                                                                                  | 0.333 |
| 672052120 | RBM12B   | RNA binding motif protein 12B                                                                                   | 0.333 |
| 157817720 | SLC16A14 | solute carrier family 16 member 14                                                                              | 0.333 |
| 157821187 | SLITRK2  | SLIT and NTRK like family member 2                                                                              | 0.333 |
| 71051128  | ANKRD10  | ankyrin repeat domain 10                                                                                        | 0.334 |
| 293348129 | DACT1    | dishevelled binding antagonist of beta catenin 1                                                                | 0.334 |
| 902763351 | LARP4B   | La ribonucleoprotein domain family member 4B                                                                    | 0.335 |
| 3676248   | Prim1    | DNA primase subunit 1                                                                                           | 0.335 |
| 564303143 | KMT2C    | lysine methyltransferase 2C                                                                                     | 0.336 |
| 564377460 | N/A      | N/A                                                                                                             | 0.336 |
| 29612542  | H2AFZ    | H2A histone family member Z                                                                                     | 0.337 |
| 511905488 | N/A      | N/A                                                                                                             | 0.337 |
| 148703547 | CNOT7    | CCR4-NOT transcription complex subunit 7                                                                        | 0.339 |
| 157819969 | CTU1     | cytosolic thiouridylase subunit 1                                                                               | 0.339 |
| 51871603  | ST7      | suppression of tumorigenicity 7                                                                                 | 0.339 |
| 564303575 | DENND2A  | DENN domain containing 2A                                                                                       | 0.340 |
| 157818529 | SLITRK3  | SLIT and NTRK like family member 3                                                                              | 0.340 |
| 149024496 | SPEN     | spen family transcriptional repressor                                                                           | 0.341 |
| 564334870 | Ap3b1    | adaptor-related protein complex 3, beta 1 subunit                                                               | 0.342 |
| 198041681 | LTN1     | listerin E3 ubiquitin protein ligase 1                                                                          | 0.342 |
| 62244083  | PDRG1    | p53 and DNA damage regulated 1                                                                                  | 0.342 |
| 60360568  | GRIA3    | glutamate ionotropic receptor AMPA type subunit 3                                                               | 0.343 |

|           |          |                                                           |       |
|-----------|----------|-----------------------------------------------------------|-------|
| 564310551 | N/A      | N/A                                                       | 0.343 |
| 198041672 | TNRC6B   | trinucleotide repeat containing 6B                        | 0.345 |
| 32451765  | FBXO10   | F-box protein 10                                          | 0.346 |
| 512957927 | N/A      | N/A                                                       | 0.346 |
| 76362828  | TEF      | TEF, PAR bZIP transcription factor                        | 0.349 |
| 148687368 | SH2B2    | SH2B adaptor protein 2                                    | 0.351 |
| 300796732 | ZNF445   | zinc finger protein 445                                   | 0.351 |
| 47155567  | ARHGAP20 | Rho GTPase activating protein 20                          | 0.352 |
| 164518906 | COX15    | COX15, cytochrome c oxidase assembly homolog              | 0.352 |
| 564313637 | CDR2L    | cerebellar degeneration related protein 2 like            | 0.353 |
| 880888432 | N/A      | N/A                                                       | 0.353 |
| 164698411 | CTDSP2   | CTD small phosphatase 2                                   | 0.354 |
| 28076889  | YIPF4    | Yip1 domain family member 4                               | 0.355 |
| 148694162 | CSNK1G1  | casein kinase 1 gamma 1                                   | 0.356 |
| 564303058 | DIDO1    | death inducer-obliterator 1                               | 0.356 |
| 157818913 | OTUD7B   | OTU deubiquitinase 7B                                     | 0.356 |
| 149027091 | GABRA3   | gamma-aminobutyric acid type A receptor alpha3 subunit    | 0.357 |
| 315259095 | UBN1     | ubiquitin 1                                               | 0.357 |
| 672052399 | N/A      | N/A                                                       | 0.360 |
| 672084304 | N/A      | N/A                                                       | 0.362 |
| 672083055 | AMMECR1L | AMMECR1 like                                              | 0.363 |
| 392348187 | LRP8     | LDL receptor related protein 8                            | 0.363 |
| 109467304 | TRIM33   | tripartite motif containing 33                            | 0.363 |
| 564310645 | PLXNB1   | plexin B1                                                 | 0.364 |
| 998455137 | RGS10    | regulator of G protein signaling 10                       | 0.364 |
| 157823223 | ZNF330   | zinc finger protein 330                                   | 0.365 |
| 157820963 | INTS5    | integrator complex subunit 5                              | 0.366 |
| 672031398 | ANKRD11  | ankyrin repeat domain 11                                  | 0.367 |
| 37360278  | CNOT6    | CCR4-NOT transcription complex subunit 6                  | 0.368 |
| 57528225  | UTP4     | UTP4, small subunit processome component                  | 0.369 |
| 674076364 | N/A      | N/A                                                       | 0.369 |
| 564328896 | CHD2     | chromodomain helicase DNA binding protein 2               | 0.370 |
| 157817286 | EZH1     | enhancer of zeste 1 polycomb repressive complex 2 subunit | 0.370 |
| 157823615 | KBTBD11  | kelch repeat and BTB domain containing 11                 | 0.371 |
| 564299019 | KIAA2026 | KIAA2026                                                  | 0.371 |
| 157818387 | DHX36    | DEAH-box helicase 36                                      | 0.372 |
| 672061705 | KMT2A    | lysine methyltransferase 2A                               | 0.372 |



|           |          |                                                             |       |
|-----------|----------|-------------------------------------------------------------|-------|
| 564342632 | TP53BP1  | tumor protein p53 binding protein 1                         | 0.372 |
| 564361788 | COL2A1   | collagen type II alpha 1 chain                              | 0.373 |
| 157820557 | EDRF1    | erythroid differentiation regulatory factor 1               | 0.374 |
| 157817845 | KMT5B    | lysine methyltransferase 5B                                 | 0.374 |
| 564351113 | N/A      | N/A                                                         | 0.374 |
| 392334198 | SEH1L    | SEH1 like nucleoporin                                       | 0.375 |
| 157819301 | ZNF777   | zinc finger protein 777                                     | 0.375 |
| 199561799 | LRP12    | LDL receptor related protein 12                             | 0.377 |
| 672037929 | TNRC6A   | trinucleotide repeat containing 6A                          | 0.377 |
| 148690303 | ZNF205   | zinc finger protein 205                                     | 0.377 |
| 564363988 | ISLR2    | immunoglobulin superfamily containing leucine rich repeat 2 | 0.378 |
| 37360474  | MIER1    | MIER1 transcriptional regulator                             | 0.379 |
| 149030718 | PIP5K1A  | phosphatidylinositol-4-phosphate 5-kinase type 1 alpha      | 0.379 |
| 300794867 | RSBN1    | round spermatid basic protein 1                             | 0.382 |
| 56090383  | TMEM43   | transmembrane protein 43                                    | 0.382 |
| 121583782 | ZNF426   | zinc finger protein 426                                     | 0.382 |
| 109464982 | TMEM131L | transmembrane 131 like                                      | 0.383 |
| 564367862 | Dst      | dystonin                                                    | 0.386 |
| 148675659 | CSDE1    | cold shock domain containing E1                             | 0.388 |
| 149047445 | FGFR3    | fibroblast growth factor receptor 3                         | 0.388 |
| 149062169 | MEN1     | menin 1                                                     | 0.390 |
| 149063273 | MPHOSPH9 | M-phase phosphoprotein 9                                    | 0.390 |
| 149015884 | ZNF407   | zinc finger protein 407                                     | 0.390 |
| 672069572 | KANSL1   | KAT8 regulatory NSL complex subunit 1                       | 0.391 |
| 564333605 | BTA1F1   | B-TFIID TATA-box binding protein associated factor 1        | 0.392 |
| 582015198 | CRY2     | cryptochrome circadian regulator 2                          | 0.392 |
| 672036088 | KMT2B    | lysine methyltransferase 2B                                 | 0.392 |
| 157819851 | ZNF565   | zinc finger protein 565                                     | 0.392 |
| 961745338 | N/A      | N/A                                                         | 0.392 |
| 13928816  | EIF2AK3  | eukaryotic translation initiation factor 2 alpha kinase 3   | 0.394 |
| 672082323 | N/A      | N/A                                                         | 0.394 |
| 149054498 | CDC27    | cell division cycle 27                                      | 0.395 |
| 61557304  | SNAPC3   | small nuclear RNA activating complex polypeptide 3          | 0.397 |
| 109470195 | TNKS1BP1 | tankyrase 1 binding protein 1                               | 0.397 |
| 564320608 | SEMA6A   | semaphorin 6A                                               | 0.398 |

|           |         |                                                                |       |
|-----------|---------|----------------------------------------------------------------|-------|
| 40018598  | ANGPTL4 | angiopoietin like 4                                            | 0.399 |
| 577019520 | CLOCK   | clock circadian regulator                                      | 0.399 |
| 149064227 | DMXL1   | Dmx like 1                                                     | 0.399 |
| 244792650 | TNIK    | TRAF2 and NCK interacting kinase                               | 0.399 |
| 127139124 | ZNF597  | zinc finger protein 597                                        | 0.399 |
| 51948532  | TBC1D20 | TBC1 domain family member 20                                   | 0.400 |
| 158138517 | FGFR2   | fibroblast growth factor receptor 2                            | 0.401 |
| 755532277 | Lrrfip2 | leucine rich repeat (in FLII) interacting protein 2            | 0.403 |
| 157820043 | ZKSCAN5 | zinc finger with KRAB and SCAN domains 5                       | 0.403 |
| 148687487 | N/A     | N/A                                                            | 0.403 |
| 14388593  | SPATA2  | spermatogenesis associated 2                                   | 0.404 |
| 157819125 | PHF13   | PHD finger protein 13                                          | 0.405 |
| 564377500 | N/A     | N/A                                                            | 0.405 |
| 672057084 | N/A     | N/A                                                            | 0.405 |
| 383087760 | PKD1    | polycystin 1, transient receptor potential channel interacting | 0.406 |
| 149024245 | RSRP1   | arginine and serine rich protein 1                             | 0.406 |
| 672014912 | SORBS1  | sorbin and SH3 domain containing 1                             | 0.406 |
| 672033285 | N/A     | N/A                                                            | 0.406 |
| 61557263  | GDAP2   | ganglioside induced differentiation associated protein 2       | 0.407 |
| 157787155 | NDST2   | N-deacetylase and N-sulfotransferase 2                         | 0.407 |
| 149016466 | NIPBL   | NIPBL, cohesin loading factor                                  | 0.407 |
| 33086606  | SRPRB   | SRP receptor beta subunit                                      | 0.407 |
| 960953448 | N/A     | N/A                                                            | 0.408 |
| 392339261 | PKP4    | plakophilin 4                                                  | 0.410 |
| 281599331 | ZKSCAN8 | zinc finger with KRAB and SCAN domains 8                       | 0.410 |
| 224451093 | ZNF317  | zinc finger protein 317                                        | 0.410 |
| 148683901 | MSI2    | musashi RNA binding protein 2                                  | 0.413 |
| 564317925 | SACS    | sacsin molecular chaperone                                     | 0.415 |
| 57527375  | THUMPD1 | THUMP domain containing 1                                      | 0.415 |
| 300797262 | BRPF1   | bromodomain and PHD finger containing 1                        | 0.416 |
| 762005986 | N4BP1   | NEDD4 binding protein 1                                        | 0.416 |
| 157822073 | PAPOLG  | poly(A) polymerase gamma                                       | 0.417 |
| 724851156 | N/A     | N/A                                                            | 0.418 |
| 40789237  | PCDHA4  | protocadherin alpha 4                                          | 0.419 |
| 67846052  | DCUN1D3 | defective in cullin neddylation 1 domain containing 3          | 0.420 |
| 293346811 | MINDY4  | MINDY lysine 48 deubiquitinase 4                               | 0.422 |

|           |          |                                                          |       |
|-----------|----------|----------------------------------------------------------|-------|
| 564316962 | N/A      | N/A                                                      | 0.424 |
| 564382837 | LIN54    | lin-54 DREAM MuvB core complex component                 | 0.425 |
| 281599335 | BMS1     | BMS1, ribosome biogenesis factor                         | 0.426 |
| 204744    | IGFBP3   | insulin like growth factor binding protein 3             | 0.426 |
| 694864049 | CEP295   | centrosomal protein 295                                  | 0.427 |
| 392353586 | INTS6    | integrator complex subunit 6                             | 0.427 |
| 281353901 | N/A      | N/A                                                      | 0.427 |
| 676284727 | N/A      | N/A                                                      | 0.427 |
| 62543511  | RAB30    | RAB30, member RAS oncogene family                        | 0.428 |
| 157819811 | C21orf91 | chromosome 21 open reading frame 91                      | 0.432 |
| 672063138 | IP6K2    | inositol hexakisphosphate kinase 2                       | 0.432 |
| 201025402 | PCDH18   | protocadherin 18                                         | 0.432 |
| 564355945 | HECTD1   | HECT domain E3 ubiquitin protein ligase 1                | 0.433 |
| 149023254 | POLR1B   | RNA polymerase I subunit B                               | 0.433 |
| 26335263  | GDF10    | growth differentiation factor 10                         | 0.435 |
| 17530969  | SLC8A3   | solute carrier family 8 member A3                        | 0.436 |
| 189181698 | ZNF131   | zinc finger protein 131                                  | 0.437 |
| 52345439  | NXPH4    | neurexophilin 4                                          | 0.438 |
| 913491397 | N/A      | N/A                                                      | 0.438 |
| 56090325  | TMEM206  | transmembrane protein 206                                | 0.442 |
| 564311452 | TMEM131  | transmembrane protein 131                                | 0.443 |
| 568940286 | BRAF     | B-Raf proto-oncogene, serine/threonine kinase            | 0.444 |
| 76559921  | CRTC2    | CREB regulated transcription coactivator 2               | 0.444 |
| 157819941 | PEX26    | peroxisomal biogenesis factor 26                         | 0.444 |
| 672057962 | N/A      | N/A                                                      | 0.445 |
| 564344754 | PMEPA1   | prostate transmembrane protein, androgen induced 1       | 0.446 |
| 971825925 | DDHD2    | DDHD domain containing 2                                 | 0.447 |
| 148686948 | RPS6KA5  | ribosomal protein S6 kinase A5                           | 0.447 |
| 564352690 | TRIT1    | tRNA isopentenyltransferase 1                            | 0.447 |
| 635141277 | N/A      | N/A                                                      | 0.447 |
| 667261609 | N/A      | N/A                                                      | 0.447 |
| 74183022  | Zfp773   | zinc finger protein 773                                  | 0.448 |
| 148693035 | CEP57    | centrosomal protein 57                                   | 0.449 |
| 564395313 | OTUD4    | OTU deubiquitinase 4                                     | 0.449 |
| 194474032 | RNF19A   | ring finger protein 19A, RBR E3 ubiquitin protein ligase | 0.449 |
| 148705863 | GABRA4   | gamma-aminobutyric acid type A receptor alpha4 subunit   | 0.450 |

|           |          |                                                                            |       |
|-----------|----------|----------------------------------------------------------------------------|-------|
| 672043253 | DENND4B  | DENN domain containing 4B                                                  | 0.451 |
| 880805457 | GPR161   | G protein-coupled receptor 161                                             | 0.451 |
| 109484871 | HERC1    | HECT and RLD domain containing E3 ubiquitin protein ligase family member 1 | 0.451 |
| 37360132  | RHOBTB3  | Rho related BTB domain containing 3                                        | 0.452 |
| 148683687 | RHBDL3   | rhomboid like 3                                                            | 0.453 |
| 568973498 | TNRC6C   | trinucleotide repeat containing 6C                                         | 0.454 |
| 74145569  | BNIP2    | BCL2 interacting protein 2                                                 | 0.456 |
| 59709429  | ZSCAN21  | zinc finger and SCAN domain containing 21                                  | 0.456 |
| 672051965 | NSMAF    | neutral sphingomyelinase activation associated factor                      | 0.459 |
| 112984092 | RPRM     | reprimo, TP53 dependent G2 arrest mediator homolog                         | 0.460 |
| 31543579  | RELN     | reelin                                                                     | 0.461 |
| 672035062 | N/A      | N/A                                                                        | 0.461 |
| 19173786  | SYF2     | SYF2 pre-mRNA splicing factor                                              | 0.463 |
| 157822011 | TGS1     | trimethylguanosine synthase 1                                              | 0.463 |
| 564354018 | DFFA     | DNA fragmentation factor subunit alpha                                     | 0.465 |
| 39930812  | AKR7A2   | aldo-keto reductase family 7 member A2                                     | 0.467 |
| 564316247 | CEP170   | centrosomal protein 170                                                    | 0.467 |
| 149066961 | TBC1D15  | TBC1 domain family member 15                                               | 0.467 |
| 109464919 | ARHGEF26 | Rho guanine nucleotide exchange factor 26                                  | 0.468 |
| 532045909 | N/A      | N/A                                                                        | 0.468 |
| 300797934 | Ranbp2   | RAN binding protein 2                                                      | 0.469 |
| 149048326 | N/A      | N/A                                                                        | 0.469 |
| 537134105 | N/A      | N/A                                                                        | 0.469 |
| 564332832 | INCENP   | inner centromere protein                                                   | 0.470 |
| 392355241 | UHRF1BP1 | UHRF1 binding protein 1                                                    | 0.470 |
| 157818267 | CNEP1R1  | CTD nuclear envelope phosphatase 1 regulatory subunit 1                    | 0.471 |
| 149025439 | DICER1   | dicer 1, ribonuclease III                                                  | 0.472 |
| 392334341 | USP38    | ubiquitin specific peptidase 38                                            | 0.472 |
| 403224961 | TRPM7    | transient receptor potential cation channel subfamily M member 7           | 0.473 |
| 58865998  | PCDHGB7  | protocadherin gamma subfamily B, 7                                         | 0.476 |
| 6981430   | PTGDS    | prostaglandin D2 synthase                                                  | 0.476 |
| 568997192 | PRDM15   | PR/SET domain 15                                                           | 0.477 |
| 213512587 | RNF31    | ring finger protein 31                                                     | 0.477 |
| 50510855  | RIMKLB   | ribosomal modification protein rimK like family member B                   | 0.478 |

|           |                    |                                                   |       |
|-----------|--------------------|---------------------------------------------------|-------|
| 672065395 | CCNYL1             | cyclin Y like 1                                   | 0.479 |
| 157821129 | UHRF2              | ubiquitin like with PHD and ring finger domains 2 | 0.479 |
| 672014312 | ZNF646             | zinc finger protein 646                           | 0.479 |
| 219273429 | A430033K04Rik      | RIKEN cDNA A430033K04 gene                        | 0.481 |
| 564318679 | CCSER2             | coiled-coil serine rich protein 2                 | 0.482 |
| 149059823 | N/A                | N/A                                               | 0.482 |
| 66730382  | TRNT1              | tRNA nucleotidyl transferase 1                    | 0.483 |
| 931568101 | N/A                | N/A                                               | 0.483 |
| 568972622 | BPTF               | bromodomain PHD finger transcription factor       | 0.484 |
| 537271325 | N/A                | N/A                                               | 0.485 |
| 672042931 | GATAD2B            | GATA zinc finger domain containing 2B             | 0.486 |
| 109460021 | KIAA2026           | KIAA2026                                          | 0.489 |
| 564297823 | KIF7               | kinesin family member 7                           | 0.489 |
| 803269187 | N/A                | N/A                                               | 0.489 |
| 56090445  | PHOSPHO2           | phosphatase, orphan 2                             | 0.490 |
| 537148165 | N/A                | N/A                                               | 0.490 |
| 149064065 | ZMYM5              | zinc finger MYM-type containing 5                 | 0.495 |
| 672017463 | N/A                | N/A                                               | 0.496 |
| 564390712 | NOL8               | nucleolar protein 8                               | 0.498 |
| 157822711 | RBM28              | RNA binding motif protein 28                      | 0.498 |
| 672023887 | N/A                | N/A                                               | 0.498 |
| 564297338 | ZNF816             | zinc finger protein 816                           | 0.500 |
| 62651891  | WASHC4             | WASH complex subunit 4                            | 0.502 |
| 149016574 | ZNF324             | zinc finger protein 324                           | 0.503 |
| 149041559 | BUD13              | BUD13 homolog                                     | 0.506 |
| 149067702 | ZNF629             | zinc finger protein 629                           | 0.506 |
| 160333172 | COG2               | component of oligomeric golgi complex 2           | 0.507 |
| 300797651 | FOXO1              | forkhead box O1                                   | 0.508 |
| 148681991 | MIOS               | meiosis regulator for oocyte development          | 0.508 |
| 71043716  | FBXO46             | F-box protein 46                                  | 0.509 |
| 149274619 | ZFHX2              | zinc finger homeobox 2                            | 0.510 |
| 61889068  | MXI1               | MAX interactor 1, dimerization protein            | 0.512 |
| 672020901 | N/A                | N/A                                               | 0.512 |
| 564393142 | WDR36              | WD repeat domain 36                               | 0.513 |
| 149025439 | DICER1             | dicer 1, ribonuclease III                         | 0.514 |
| 281371441 | LOC100910540/Mepce | methylphosphate capping enzyme                    | 0.515 |
| 198278557 | NRF1               | nuclear respiratory factor 1                      | 0.515 |
| 66730445  | LZTFL1             | leucine zipper transcription factor like 1        | 0.518 |

|           |         |                                                          |       |
|-----------|---------|----------------------------------------------------------|-------|
| 114145794 | ANKLE2  | ankyrin repeat and LEM domain containing 2               | 0.519 |
| 39104628  | SORBS1  | sorbin and SH3 domain containing 1                       | 0.521 |
| 672088045 | N/A     | N/A                                                      | 0.521 |
| 564301979 | CKAP5   | cytoskeleton associated protein 5                        | 0.526 |
| 926717435 | N/A     | N/A                                                      | 0.529 |
| 564352121 | LRP8    | LDL receptor related protein 8                           | 0.530 |
| 635121365 | N/A     | N/A                                                      | 0.530 |
| 564310412 | DOPEY1  | dopey family member 1                                    | 0.535 |
| 815891112 | AHR     | aryl hydrocarbon receptor                                | 0.536 |
| 672027688 | N/A     | N/A                                                      | 0.537 |
| 149020413 | Zfp599  | zinc finger protein 599                                  | 0.538 |
| 564323252 | KLHL13  | kelch like family member 13                              | 0.539 |
| 257196174 | PDZRN4  | PDZ domain containing ring finger 4                      | 0.539 |
| 157821859 | RNF219  | ring finger protein 219                                  | 0.542 |
| 148710252 | SLITRK4 | SLIT and NTRK like family member 4                       | 0.542 |
| 564309026 | SUN2    | Sad1 and UNC84 domain containing 2                       | 0.543 |
| 148704240 | ZMYM2   | zinc finger MYM-type containing 2                        | 0.543 |
| 755516639 | N/A     | N/A                                                      | 0.543 |
| 157819299 | FAM167A | family with sequence similarity 167 member A             | 0.544 |
| 157824010 | MRPS31  | mitochondrial ribosomal protein S31                      | 0.544 |
| 198278471 | ZBED4   | zinc finger BED-type containing 4                        | 0.547 |
| 402692201 | EML5    | echinoderm microtubule associated protein like 5         | 0.548 |
| 149066158 | ZNF623  | zinc finger protein 623                                  | 0.549 |
| 672022661 | N/A     | N/A                                                      | 0.553 |
| 16258817  | ATP7A   | ATPase copper transporting alpha                         | 0.554 |
| 672087657 | N/A     | N/A                                                      | 0.554 |
| 149063010 | DTX2    | deltex E3 ubiquitin ligase 2                             | 0.556 |
| 148682691 | CLDN12  | claudin 12                                               | 0.558 |
| 564329414 | IKBKG   | inhibitor of nuclear factor kappa B kinase subunit gamma | 0.558 |
| 672087275 | KDM5C   | lysine demethylase 5C                                    | 0.558 |
| 157820309 | ZNF592  | zinc finger protein 592                                  | 0.558 |
| 635017744 | N/A     | N/A                                                      | 0.558 |
| 293349725 | AMER3   | APC membrane recruitment protein 3                       | 0.560 |
| 215490074 | SAP18   | Sin3A associated protein 18                              | 0.561 |
| 62078501  | TTI2    | TELO2 interacting protein 2                              | 0.561 |
| 209364558 | CEP290  | centrosomal protein 290                                  | 0.563 |
| 149044768 | VPS54   | VPS54, GARP complex subunit                              | 0.563 |

|           |           |                                                             |       |
|-----------|-----------|-------------------------------------------------------------|-------|
| 149048116 | KHDC4     | KH domain containing 4, pre-mRNA splicing factor            | 0.565 |
| 145553978 | SFMBT1    | Scm like with four mbt domains 1                            | 0.566 |
| 564325866 | ZNF274    | zinc finger protein 274                                     | 0.568 |
| 51948522  | PLA2G15   | phospholipase A2 group XV                                   | 0.570 |
| 77917610  | GPBP1L1   | GC-rich promoter binding protein 1 like 1                   | 0.571 |
| 213688370 | EXOSC7    | exosome component 7                                         | 0.575 |
| 564341299 | N/A       | N/A                                                         | 0.576 |
| 256000825 | FAM227A   | family with sequence similarity 227 member A                | 0.577 |
| 564363988 | ISLR2     | immunoglobulin superfamily containing leucine rich repeat 2 | 0.577 |
| 344250492 | N/A       | N/A                                                         | 0.578 |
| 884934330 | N/A       | N/A                                                         | 0.579 |
| 564367862 | Dst       | dystonin                                                    | 0.580 |
| 564311697 | PIKFYVE   | phosphoinositide kinase, FYVE-type zinc finger containing   | 0.589 |
| 672066092 | UNC80     | unc-80 homolog, NALCN channel complex subunit               | 0.589 |
| 6981680   | TSHR      | thyroid stimulating hormone receptor                        | 0.591 |
| 392337836 | RNF169    | ring finger protein 169                                     | 0.596 |
| 241666396 | CLK1      | CDC like kinase 1                                           | 0.597 |
| 13928942  | PER2      | period circadian regulator 2                                | 0.600 |
| 672063745 | SEC22C    | SEC22 homolog C, vesicle trafficking protein                | 0.600 |
| 56605820  | PAPD4     | poly(A) RNA polymerase D4, non-canonical                    | 0.601 |
| 564299234 | Lcor      | ligand dependent nuclear receptor corepressor               | 0.607 |
| 731286412 | N/A       | N/A                                                         | 0.608 |
| 62078947  | MOSPD1    | motile sperm domain containing 1                            | 0.609 |
| 392354293 | Hmgb3     | high mobility group box 3                                   | 0.611 |
| 404351643 | HMCN1     | hemicentin 1                                                | 0.618 |
| 392352051 | N/A       | N/A                                                         | 0.619 |
| 74186677  | SIN3B     | SIN3 transcription regulator family member B                | 0.622 |
| 157817797 | PDCD2L    | programmed cell death 2 like                                | 0.623 |
| 672039849 | STX3      | syntaxin 3                                                  | 0.632 |
| 55741772  | SDAD1     | SDA1 domain containing 1                                    | 0.634 |
| 564305530 | PTPRD     | protein tyrosine phosphatase, receptor type D               | 0.635 |
| 293339965 | RAB11FIP3 | RAB11 family interacting protein 3                          | 0.640 |
| 845633640 | TSSC4     | tumor suppressing subtransferable candidate 4               | 0.640 |
| 16758666  | TIMP1     | TIMP metalloproteinase inhibitor 1                          | 0.642 |
| 564395350 | N/A       | N/A                                                         | 0.644 |
| 21703842  | RTCB      | RNA 2',3'-cyclic phosphate and 5'-OH ligase                 | 0.646 |

|           |              |                                                                          |       |
|-----------|--------------|--------------------------------------------------------------------------|-------|
| 28972363  | DOCK4        | dedicator of cytokinesis 4                                               | 0.647 |
| 157820477 | ZFYVE26      | zinc finger FYVE-type containing 26                                      | 0.647 |
| 149041904 | GLCE         | glucuronic acid epimerase                                                | 0.648 |
| 149052692 | N/A          | N/A                                                                      | 0.648 |
| 157819993 | CCDC112      | coiled-coil domain containing 112                                        | 0.649 |
| 34872960  | SMG8         | SMG8, nonsense mediated mRNA decay factor                                | 0.650 |
| 149042018 | N/A          | N/A                                                                      | 0.650 |
| 157817885 | MED17        | mediator complex subunit 17                                              | 0.652 |
| 188595675 | RFX7         | regulatory factor X7                                                     | 0.654 |
| 564301893 | CWC22        | CWC22 spliceosome associated protein homolog                             | 0.655 |
| 157822681 | EFNB2        | ephrin B2                                                                | 0.658 |
| 149066285 | PHF20L1      | PHD finger protein 20 like 1                                             | 0.659 |
| 537191098 | N/A          | N/A                                                                      | 0.660 |
| 348041347 | CENPL        | centromere protein L                                                     | 0.663 |
| 171846573 | FBXL4        | F-box and leucine rich repeat protein 4                                  | 0.663 |
| 564367481 | TMEM63B      | transmembrane protein 63B                                                | 0.663 |
| 149047880 | SCAI         | suppressor of cancer cell invasion                                       | 0.664 |
| 209529687 | TMTC3        | transmembrane and tetratricopeptide repeat containing 3                  | 0.664 |
| 564309890 | CBL          | Cbl proto-oncogene                                                       | 0.665 |
| 149041414 | TBCEL        | tubulin folding cofactor E like                                          | 0.666 |
| 564320724 | Fbxo38       | F-box protein 38                                                         | 0.667 |
| 149019004 | IBTK         | inhibitor of Bruton tyrosine kinase                                      | 0.667 |
| 293349986 | SMCHD1       | structural maintenance of chromosomes flexible hinge domain containing 1 | 0.667 |
| 672065534 | IKZF2        | IKAROS family zinc finger 2                                              | 0.669 |
| 56090421  | PXYLP1       | 2-phosphoxylose phosphatase 1                                            | 0.669 |
| 829923130 | N/A          | N/A                                                                      | 0.669 |
| 293341533 | LOC108348225 | feline leukemia virus subgroup C receptor-related protein 1              | 0.670 |
| 431918221 | N/A          | N/A                                                                      | 0.671 |
| 672078177 | NYNRIN       | NYN domain and retroviral integrase containing                           | 0.673 |
| 149042171 | RTL5         | retrotransposon Gag like 5                                               | 0.674 |
| 63100438  | ZBTB8OS      | zinc finger and BTB domain containing 8 opposite strand                  | 0.674 |
| 672026767 | N/A          | N/A                                                                      | 0.676 |
| 157786898 | ALKBH4       | alkB homolog 4, lysine demethylase                                       | 0.680 |
| 66730382  | TRNT1        | tRNA nucleotidyl transferase 1                                           | 0.684 |



|           |            |                                                                             |       |
|-----------|------------|-----------------------------------------------------------------------------|-------|
| 80861398  | CRY1       | cryptochrome circadian regulator 1                                          | 0.687 |
| 157818399 | RAI2       | retinoic acid induced 2                                                     | 0.687 |
| 672029123 | PBRM1      | polybromo 1                                                                 | 0.688 |
| 197927116 | ZNF566     | zinc finger protein 566                                                     | 0.688 |
| 564347830 | ZXDC       | ZXD family zinc finger C                                                    | 0.688 |
| 564320621 | DMXL1      | Dmx like 1                                                                  | 0.689 |
| 124487354 | TAF4       | TATA-box binding protein associated factor 4                                | 0.689 |
| 109479106 | WDCP       | WD repeat and coiled coil containing                                        | 0.689 |
| 149031942 | N/A        | N/A                                                                         | 0.699 |
| 31324552  | NADSYN1    | NAD synthetase 1                                                            | 0.700 |
| 884945546 | N/A        | N/A                                                                         | 0.700 |
| 149025031 | SUSD6      | sushi domain containing 6                                                   | 0.704 |
| 625182464 | N/A        | N/A                                                                         | 0.708 |
| 568970985 | MBTD1      | mbt domain containing 1                                                     | 0.709 |
| 884934330 | N/A        | N/A                                                                         | 0.709 |
| 456367253 | CEP162     | centrosomal protein 162                                                     | 0.710 |
| 157819265 | CWC25      | CWC25 spliceosome associated protein homolog                                | 0.710 |
| 293349917 | C2orf72    | chromosome 2 open reading frame 72                                          | 0.711 |
| 157822327 | ATG14      | autophagy related 14                                                        | 0.714 |
| 157820809 | KCTD21     | potassium channel tetramerization domain containing 21                      | 0.714 |
| 564301426 | CNTRL      | centriolin                                                                  | 0.718 |
| 564312324 | ZNF174     | zinc finger protein 174                                                     | 0.719 |
| 564352534 | Szt2       | SZT2, KICSTOR complex subunit                                               | 0.723 |
| 672015224 | N/A        | N/A                                                                         | 0.725 |
| 564315959 | CEP350     | centrosomal protein 350                                                     | 0.730 |
| 149025439 | DICER1     | dicer 1, ribonuclease III                                                   | 0.743 |
| 392341307 | Ikzf4      | IKAROS family zinc finger 4                                                 | 0.744 |
| 149035563 | MUTYH      | mutY DNA glycosylase                                                        | 0.745 |
| 564315183 | CUX1       | cut like homeobox 1                                                         | 0.748 |
| 672084062 | TEPP       | testis, prostate and placenta expressed                                     | 0.748 |
| 564395631 | Slc25a36l1 | solute carrier family 25 (pyrimidine nucleotide carrier ), member 36-like 1 | 0.751 |
| 149038509 | N/A        | N/A                                                                         | 0.754 |
| 157822713 | NPAT       | nuclear protein, coactivator of histone transcription                       | 0.757 |
| 67078426  | SPIN1      | spindlin 1                                                                  | 0.760 |
| 564318578 | ANKRD28    | ankyrin repeat domain 28                                                    | 0.762 |
| 62078827  | CTDSPL2    | CTD small phosphatase like 2                                                | 0.762 |

|           |              |                                                       |       |
|-----------|--------------|-------------------------------------------------------|-------|
| 564389552 | LOC100910854 | zinc finger MYND domain-containing protein 19-like    | 0.764 |
| 672055261 | N/A          | N/A                                                   | 0.767 |
| 149034958 | ZNF12        | zinc finger protein 12                                | 0.769 |
| 117414145 | ABCD4        | ATP binding cassette subfamily D member 4             | 0.770 |
| 157821277 | HAUS3        | HAUS augmin like complex subunit 3                    | 0.772 |
| 149047034 | N/A          | N/A                                                   | 0.772 |
| 564320606 | SEMA6A       | semaphorin 6A                                         | 0.776 |
| 431916930 | N/A          | N/A                                                   | 0.777 |
| 83320078  | CCDC130      | coiled-coil domain containing 130                     | 0.778 |
| 672069572 | KANSL1       | KAT8 regulatory NSL complex subunit 1                 | 0.781 |
| 970744322 | N/A          | N/A                                                   | 0.781 |
| 37360610  | FMNL3        | formin like 3                                         | 0.787 |
| 77627983  | MLX          | MLX, MAX dimerization protein                         | 0.788 |
| 399154114 | KPNA2        | karyopherin subunit alpha 2                           | 0.795 |
| 281332148 | RIOK1        | RIO kinase 1                                          | 0.796 |
| 672027054 | N/A          | N/A                                                   | 0.812 |
| 564320728 | Fbxo38       | F-box protein 38                                      | 0.819 |
| 19424182  | CABP1        | calcium binding protein 1                             | 0.821 |
| 149018273 | XYLB         | xylulokinase                                          | 0.825 |
| 293651589 | CPEB2        | cytoplasmic polyadenylation element binding protein 2 | 0.826 |
| 74184716  | Kat6b        | K(lysine) acetyltransferase 6B                        | 0.828 |
| 67078462  | SOX18        | SRY-box 18                                            | 0.831 |
| 755537242 | CLK4         | CDC like kinase 4                                     | 0.833 |
| 149032239 | N/A          | N/A                                                   | 0.833 |
| 672017191 | N/A          | N/A                                                   | 0.834 |
| 672014954 | DNMBP        | dynamin binding protein                               | 0.835 |
| 16758212  | FUT9         | fucosyltransferase 9                                  | 0.842 |
| 157818841 | POGZ         | pogo transposable element derived with ZNF domain     | 0.842 |
| 157819737 | SARS2        | seryl-tRNA synthetase 2, mitochondrial                | 0.842 |
| 672029117 | N/A          | N/A                                                   | 0.842 |
| 564339225 | N/A          | N/A                                                   | 0.844 |
| 817337812 | N/A          | N/A                                                   | 0.847 |
| 109495817 | GLT1D1       | glycosyltransferase 1 domain containing 1             | 0.862 |
| 16758572  | DLK1         | delta like non-canonical Notch ligand 1               | 0.873 |
| 300795477 | PDZD3        | PDZ domain containing 3                               | 0.873 |
| 407339769 | TTC30A       | tetratricopeptide repeat domain 30A                   | 0.880 |
| 564400410 | AMOT         | angiomin                                              | 0.892 |

|           |          |                                                                  |       |
|-----------|----------|------------------------------------------------------------------|-------|
| 293342292 | FAM208A  | family with sequence similarity 208 member A                     | 0.906 |
| 157821209 | ZBTB37   | zinc finger and BTB domain containing 37                         | 0.906 |
| 149035460 | N/A      | N/A                                                              | 0.908 |
| 564302924 | TSHZ2    | teashirt zinc finger homeobox 2                                  | 0.917 |
| 197386987 | HDX      | highly divergent homeobox                                        | 0.922 |
| 989935538 | N/A      | N/A                                                              | 0.922 |
| 68163515  | FIBIN    | fin bud initiation factor homolog (zebrafish)                    | 0.924 |
| 564320454 | SAP130   | Sin3A associated protein 130                                     | 0.927 |
| 564317999 | N/A      | N/A                                                              | 0.928 |
| 71361639  | GLI4     | GLI family zinc finger 4                                         | 0.929 |
| 568929584 | TRIM62   | tripartite motif containing 62                                   | 0.929 |
| 293347435 | PTPRD    | protein tyrosine phosphatase, receptor type D                    | 0.930 |
| 672035395 | DMWD     | DM1 locus, WD repeat containing                                  | 0.940 |
| 564317923 | SACS     | sacsin molecular chaperone                                       | 0.945 |
| 704532863 | N/A      | N/A                                                              | 0.950 |
| 672076513 | N/A      | N/A                                                              | 0.950 |
| 672062667 | N/A      | N/A                                                              | 0.952 |
| 392332010 | SLC38A10 | solute carrier family 38 member 10                               | 0.955 |
| 109488483 | KIAA0753 | KIAA0753                                                         | 0.960 |
| 568916876 | GREM1    | gremlin 1, DAN family BMP antagonist                             | 0.961 |
| 392339806 | CFAP69   | cilia and flagella associated protein 69                         | 0.964 |
| 672025117 | MBTD1    | mbt domain containing 1                                          | 0.965 |
| 148687007 | CEP128   | centrosomal protein 128                                          | 0.975 |
| 157818625 | SLC2A12  | solute carrier family 2 member 12                                | 0.979 |
| 392340108 | TMCC1    | transmembrane and coiled-coil domain family 1                    | 0.980 |
| 625226711 | N/A      | N/A                                                              | 0.980 |
| 148747200 | KCNJ8    | potassium voltage-gated channel subfamily J member 8             | 0.981 |
| 149021160 | N/A      | N/A                                                              | 0.981 |
| 564304579 | ATF7IP   | activating transcription factor 7 interacting protein            | 0.984 |
| 19424314  | KCNE2    | potassium voltage-gated channel subfamily E regulatory subunit 2 | 0.986 |
| 189011634 | ARMC7    | armadillo repeat containing 7                                    | 0.987 |
| 293353154 | TBC1D1   | TBC1 domain family member 1                                      | 0.989 |
| 829912534 | N/A      | N/A                                                              | 0.990 |
| 564303143 | KMT2C    | lysine methyltransferase 2C                                      | 0.997 |
| 672061705 | KMT2A    | lysine methyltransferase 2A                                      | 1.003 |
| 149031942 | N/A      | N/A                                                              | 1.003 |
| 564298396 | ZNF764   | zinc finger protein 764                                          | 1.006 |

|           |              |                                                                      |       |
|-----------|--------------|----------------------------------------------------------------------|-------|
| 669303362 | N/A          | N/A                                                                  | 1.009 |
| 148693601 | N/A          | N/A                                                                  | 1.009 |
| 672031484 | PCNX2        | pecanex homolog 2                                                    | 1.017 |
| 672040273 | CPEB3        | cytoplasmic polyadenylation element binding protein 3                | 1.024 |
| 564386624 | AMER2        | APC membrane recruitment protein 2                                   | 1.043 |
| 568979800 | NPAS3        | neuronal PAS domain protein 3                                        | 1.043 |
| 672013187 | DMWD         | DM1 locus, WD repeat containing                                      | 1.051 |
| 672044124 | N/A          | N/A                                                                  | 1.054 |
| 564313512 | N/A          | N/A                                                                  | 1.059 |
| 564296988 | ZNF235       | zinc finger protein 235                                              | 1.066 |
| 564313514 | BPTF         | bromodomain PHD finger transcription factor                          | 1.074 |
| 672088045 | N/A          | N/A                                                                  | 1.074 |
| 672060610 | KMT2D        | lysine methyltransferase 2D                                          | 1.075 |
| 594100882 | N/A          | N/A                                                                  | 1.075 |
| 564317714 | Ktn1         | kinectin 1                                                           | 1.078 |
| 564300485 | LOC102551095 | uncharacterized LOC102551095                                         | 1.079 |
| 426370908 | N/A          | N/A                                                                  | 1.080 |
| 293353154 | TBC1D1       | TBC1 domain family member 1                                          | 1.082 |
| 564314535 | RUBCN        | RUN and cysteine rich domain containing beclin 1 interacting protein | 1.084 |
| 672058561 | N/A          | N/A                                                                  | 1.085 |
| 672025458 | FBF1         | Fas binding factor 1                                                 | 1.090 |
| 672028080 | PRR14L       | proline rich 14 like                                                 | 1.099 |
| 672074697 | ILDR2        | immunoglobulin like domain containing receptor 2                     | 1.101 |
| 564342470 | MGA          | MGA, MAX dimerization protein                                        | 1.104 |
| 747019224 | SRCAP        | Snf2 related CREBBP activator protein                                | 1.107 |
| 157822717 | ARHGEF19     | Rho guanine nucleotide exchange factor 19                            | 1.110 |
| 569012000 | KLF8         | Kruppel like factor 8                                                | 1.118 |
| 913507039 | N/A          | N/A                                                                  | 1.120 |
| 149058952 | MEF2C        | myocyte enhancer factor 2C                                           | 1.126 |
| 149042270 | LAS1L        | LAS1 like, ribosome biogenesis factor                                | 1.128 |
| 392337738 | LYSMD4       | LysM domain containing 4                                             | 1.128 |
| 672026785 | N/A          | N/A                                                                  | 1.128 |
| 755566692 | HUWE1        | HECT, UBA and WWE domain containing 1, E3 ubiquitin protein ligase   | 1.130 |
| 293352381 | PAN3         | PAN3 poly(A) specific ribonuclease subunit                           | 1.141 |
| 157817955 | ACER2        | alkaline ceramidase 2                                                | 1.144 |
| 28570188  | CLIC6        | chloride intracellular channel 6                                     | 1.158 |

|           |         |                                                                    |       |
|-----------|---------|--------------------------------------------------------------------|-------|
| 564323057 | ARMCX4  | armadillo repeat containing, X-linked 4                            | 1.159 |
| 564341932 | HARBI1  | harbinger transposase derived 1                                    | 1.160 |
| 564320724 | Fbxo38  | F-box protein 38                                                   | 1.165 |
| 149020413 | Zfp599  | zinc finger protein 599                                            | 1.175 |
| 255982585 | DIO3    | iodothyronine deiodinase 3                                         | 1.176 |
| 724831496 | N/A     | N/A                                                                | 1.176 |
| 404501478 | SLX4IP  | SLX4 interacting protein                                           | 1.178 |
| 13786168  | KL      | klotho                                                             | 1.180 |
| 672082610 | N/A     | N/A                                                                | 1.184 |
| 564297736 | N/A     | N/A                                                                | 1.184 |
| 564321849 | KCTD20  | potassium channel tetramerization domain containing 20             | 1.188 |
| 148702599 | UNK     | unkempt family zinc finger                                         | 1.188 |
| 564303928 | TET3    | tet methylcytosine dioxygenase 3                                   | 1.190 |
| 140969817 | BPTF    | bromodomain PHD finger transcription factor                        | 1.191 |
| 672087657 | N/A     | N/A                                                                | 1.198 |
| 186659510 | MYH6    | myosin heavy chain 6                                               | 1.202 |
| 564313512 | N/A     | N/A                                                                | 1.206 |
| 78097110  | N4BP2L1 | NEDD4 binding protein 2 like 1                                     | 1.208 |
| 187957728 | FANCM   | Fanconi anemia complementation group M                             | 1.210 |
| 564378170 | PAN3    | PAN3 poly(A) specific ribonuclease subunit                         | 1.219 |
| 149018731 | TMEM108 | transmembrane protein 108                                          | 1.226 |
| 149042882 | ZNF334  | zinc finger protein 334                                            | 1.226 |
| 109475482 | COL8A2  | collagen type VIII alpha 2 chain                                   | 1.230 |
| 724831496 | N/A     | N/A                                                                | 1.240 |
| 672083937 | TSHZ1   | teashirt zinc finger homeobox 1                                    | 1.250 |
| 149056503 | Zfp60   | zinc finger protein 60                                             | 1.254 |
| 829964589 | N/A     | N/A                                                                | 1.258 |
| 157822425 | MFRP    | membrane frizzled-related protein                                  | 1.264 |
| 6978527   | AQP1    | aquaporin 1 (Colton blood group)                                   | 1.265 |
| 672032215 | REPS2   | RALBP1 associated Eps domain containing 2                          | 1.276 |
| 293362695 | Akap17b | A kinase (PRKA) anchor protein 17B                                 | 1.280 |
| 672014266 | TMEM219 | transmembrane protein 219                                          | 1.281 |
| 149028625 | BRDT    | bromodomain testis associated                                      | 1.286 |
| 564296586 | Zfp943  | zinc finger protein 943                                            | 1.291 |
| 293348214 | CCDC88C | coiled-coil domain containing 88C                                  | 1.293 |
| 121583673 | CACTIN  | cactin, spliceosome C complex subunit                              | 1.298 |
| 755566690 | HUWE1   | HECT, UBA and WWE domain containing 1, E3 ubiquitin protein ligase | 1.299 |
| 149035005 | IQCE    | IQ motif containing E                                              | 1.303 |

|           |              |                                                             |       |
|-----------|--------------|-------------------------------------------------------------|-------|
| 568921554 | Ank2         | ankyrin 2, brain                                            | 1.311 |
| 61556986  | TF           | transferrin                                                 | 1.311 |
| 564320109 | FAM208B      | family with sequence similarity 208 member B                | 1.318 |
| 149016805 | PSD3         | pleckstrin and Sec7 domain containing 3                     | 1.318 |
| 672078055 | IRF9         | interferon regulatory factor 9                              | 1.330 |
| 672040275 | CPEB3        | cytoplasmic polyadenylation element binding protein 3       | 1.342 |
| 149020413 | Zfp599       | zinc finger protein 599                                     | 1.352 |
| 568975399 | FAM114A2     | family with sequence similarity 114 member A2               | 1.356 |
| 672072794 | N/A          | N/A                                                         | 1.363 |
| 672089090 | LOC103694537 | mediator of RNA polymerase II transcription subunit 14-like | 1.366 |
| 672054310 | N/A          | N/A                                                         | 1.366 |
| 293352381 | PAN3         | PAN3 poly(A) specific ribonuclease subunit                  | 1.369 |
| 157822929 | EPHA2        | EPH receptor A2                                             | 1.379 |
| 293358899 | ANKRD26      | ankyrin repeat domain 26                                    | 1.385 |
| 564395676 | CDH3         | cadherin 3                                                  | 1.394 |
| 149051391 | N/A          | N/A                                                         | 1.403 |
| 817314209 | N/A          | N/A                                                         | 1.407 |
| 672087275 | KDM5C        | lysine demethylase 5C                                       | 1.411 |
| 672087472 | REPS2        | RALBP1 associated Eps domain containing 2                   | 1.413 |
| 672079407 | CCDC66       | coiled-coil domain containing 66                            | 1.427 |
| 333033763 | TTR          | transthyretin                                               | 1.427 |
| 149024626 | EXOSC10      | exosome component 10                                        | 1.428 |
| 293347270 | OSGIN2       | oxidative stress induced growth inhibitor family member 2   | 1.433 |
| 672046728 | N/A          | N/A                                                         | 1.446 |
| 392340179 | RERG         | RAS like estrogen regulated growth inhibitor                | 1.455 |
| 392338392 | PCNT         | pericentrin                                                 | 1.465 |
| 197304784 | IQSEC1       | IQ motif and Sec7 domain 1                                  | 1.468 |
| 564300507 | SH3D19       | SH3 domain containing 19                                    | 1.469 |
| 568972665 | TSPOAP1      | TSPO associated protein 1                                   | 1.480 |
| 149041229 | N/A          | N/A                                                         | 1.483 |
| 585192925 | N/A          | N/A                                                         | 1.489 |
| 157821221 | TMEM72       | transmembrane protein 72                                    | 1.500 |
| 672088752 | MCF2         | MCF.2 cell line derived transforming sequence               | 1.501 |
| 392332921 | N/A          | N/A                                                         | 1.501 |
| 569001477 | MTCL1        | microtubule crosslinking factor 1                           | 1.517 |
| 47059175  | GTF2H4       | general transcription factor IIH subunit 4                  | 1.520 |
| 913498340 | N/A          | N/A                                                         | 1.529 |

|           |              |                                                                    |       |
|-----------|--------------|--------------------------------------------------------------------|-------|
| 564304274 | ZNF248       | zinc finger protein 248                                            | 1.561 |
| 961766127 | N/A          | N/A                                                                | 1.565 |
| 109492822 | PAXB1        | PAX3 and PAX7 binding protein 1                                    | 1.570 |
| 564378315 | Zfp853       | zinc finger protein 853                                            | 1.578 |
| 672088045 | N/A          | N/A                                                                | 1.585 |
| 149059246 | N/A          | N/A                                                                | 1.588 |
| 564310365 | MYO6         | myosin VI                                                          | 1.594 |
| 564388164 | WAPL         | WAPL cohesin release factor                                        | 1.599 |
| 694937047 | ARPC5L       | actin related protein 2/3 complex subunit 5 like                   | 1.612 |
| 28972866  | CSMD3        | CUB and Sushi multiple domains 3                                   | 1.635 |
| 157817406 | SKA1         | spindle and kinetochore associated complex subunit 1               | 1.642 |
| 672053077 | N/A          | N/A                                                                | 1.655 |
| 586908220 | ARHGAP44     | Rho GTPase activating protein 44                                   | 1.659 |
| 568990288 | NIPBL        | NIPBL, cohesin loading factor                                      | 1.663 |
| 149042883 | LOC100365365 | rCG32328-like                                                      | 1.665 |
| 672080026 | N/A          | N/A                                                                | 1.672 |
| 149047683 | N/A          | N/A                                                                | 1.673 |
| 755566690 | HUWE1        | HECT, UBA and WWE domain containing 1, E3 ubiquitin protein ligase | 1.675 |
| 564329926 | EMSY         | EMSY, BRCA2 interacting transcriptional repressor                  | 1.703 |
| 68063179  | N/A          | N/A                                                                | 1.705 |
| 672047351 | RALGAPA2     | Ral GTPase activating protein catalytic alpha subunit 2            | 1.714 |
| 149045719 | PIGO         | phosphatidylinositol glycan anchor biosynthesis class O            | 1.726 |
| 672047003 | CDAN1        | codanin 1                                                          | 1.728 |
| 293340825 | USF3         | upstream transcription factor family member 3                      | 1.732 |
| 564306696 | SRBD1        | S1 RNA binding domain 1                                            | 1.739 |
| 564311678 | PLEKHM3      | pleckstrin homology domain containing M3                           | 1.801 |
| 564313028 | ATAD5        | ATPase family, AAA domain containing 5                             | 1.813 |
| 568941582 | IQSEC1       | IQ motif and Sec7 domain 1                                         | 1.836 |
| 149056134 | Zfp17        | zinc finger protein 585B                                           | 1.837 |
| 392342123 | ALS2CL       | ALS2 C-terminal like                                               | 1.856 |
| 61097928  | SNAI1        | snail family transcriptional repressor 1                           | 1.858 |
| 672063748 | N/A          | N/A                                                                | 1.858 |
| 564395696 | TANGO6       | transport and golgi organization 6 homolog                         | 1.879 |
| 564324736 | L3MBTL3      | L3MBTL3, histone methyl-lysine binding protein                     | 1.904 |

|           |          |                                                                      |       |
|-----------|----------|----------------------------------------------------------------------|-------|
| 564378170 | PAN3     | PAN3 poly(A) specific ribonuclease subunit                           | 1.907 |
| 149016012 | KANSL1L  | KAT8 regulatory NSL complex subunit 1 like                           | 1.914 |
| 149056134 | Zfp17    | zinc finger protein 585B                                             | 1.916 |
| 672015368 | MAST4    | microtubule associated serine/threonine kinase family member 4       | 1.956 |
| 149035338 | APBB2    | amyloid beta precursor protein binding family B member 2             | 1.962 |
| 672066800 | N/A      | N/A                                                                  | 1.987 |
| 672062667 | N/A      | N/A                                                                  | 2.000 |
| 40786461  | NAPEPLD  | N-acyl phosphatidylethanolamine phospholipase D                      | 2.014 |
| 149019127 | N/A      | N/A                                                                  | 2.016 |
| 946681954 | N/A      | N/A                                                                  | 2.040 |
| 672025361 | BPTF     | bromodomain PHD finger transcription factor                          | 2.077 |
| 124378035 | TNRC6C   | trinucleotide repeat containing 6C                                   | 2.132 |
| 157824012 | TRIM45   | tripartite motif containing 45                                       | 2.144 |
| 672013014 | N/A      | N/A                                                                  | 2.147 |
| 564313510 | BPTF     | bromodomain PHD finger transcription factor                          | 2.170 |
| 568907669 | NYAP2    | neuronal tyrosine-phosphorylated phosphoinositide-3-kinase adaptor 2 | 2.190 |
| 148675846 | FAM114A2 | family with sequence similarity 114 member A2                        | 2.238 |
| 149048910 | N/A      | N/A                                                                  | 2.239 |
| 564314522 | LRCH3    | leucine rich repeats and calponin homology domain containing 3       | 2.265 |
| 672023724 | PRICKLE4 | prickle planar cell polarity protein 4                               | 2.271 |
| 564320493 | KDM3B    | lysine demethylase 3B                                                | 2.284 |
| 564306247 | PHACTR4  | phosphatase and actin regulator 4                                    | 2.325 |
| 672063750 | N/A      | N/A                                                                  | 2.347 |
| 293351303 | METTL22  | methyltransferase like 22                                            | 2.365 |
| 672022282 | KIF21A   | kinesin family member 21A                                            | 2.374 |
| 564312627 | ZFP62    | ZFP62 zinc finger protein                                            | 2.394 |
| 564309671 | KIAA0895 | KIAA0895                                                             | 2.415 |
| 755548575 | N/A      | N/A                                                                  | 2.415 |
| 50510463  | PRUNE2   | prune homolog 2                                                      | 2.470 |
| 149060669 | LRCH3    | leucine rich repeats and calponin homology domain containing 3       | 2.478 |
| 564303135 | KMT2C    | lysine methyltransferase 2C                                          | 2.505 |
| 78000177  | SORBS1   | sorbin and SH3 domain containing 1                                   | 2.557 |
| 672063748 | N/A      | N/A                                                                  | 2.602 |
| 158303341 | MPP4     | membrane palmitoylated protein 4                                     | 2.655 |



|           |                                |                                                                      |       |
|-----------|--------------------------------|----------------------------------------------------------------------|-------|
| 672084625 | LOC100909409 (includes others) | RGD1562660                                                           | 2.679 |
| 625292335 | N/A                            | N/A                                                                  | 2.696 |
| 568979790 | NPAS3                          | neuronal PAS domain protein 3                                        | 2.794 |
| 564305043 | RBM12B                         | RNA binding motif protein 12B                                        | 2.803 |
| 148676240 | DPH7                           | diphthamide biosynthesis 7                                           | 2.807 |
| 569009290 | TENM1                          | teneurin transmembrane protein 1                                     | 2.844 |
| 149066285 | PHF20L1                        | PHD finger protein 20 like 1                                         | 2.858 |
| 392340509 | PTPRD                          | protein tyrosine phosphatase, receptor type D                        | 2.880 |
| 293349593 | Pot1b                          | protection of telomeres 1B                                           | 2.890 |
| 564329920 | EMSY                           | EMSY, BRCA2 interacting transcriptional repressor                    | 2.899 |
| 564342627 | TP53BP1                        | tumor protein p53 binding protein 1                                  | 2.920 |
| 157820641 | CLDN2                          | claudin 2                                                            | 2.963 |
| 84000579  | FTL                            | ferritin light chain                                                 | 2.972 |
| 50370130  | PALLD                          | palladin, cytoskeletal associated protein                            | 3.018 |
| 755495595 | PRRC2C                         | proline rich coiled-coil 2C                                          | 3.040 |
| 672063332 | N/A                            | N/A                                                                  | 3.126 |
| 564302768 | KIAA1755                       | KIAA1755                                                             | 3.150 |
| 672048712 | KMT2C                          | lysine methyltransferase 2C                                          | 3.209 |
| 9507065   | SCN11A                         | sodium voltage-gated channel alpha subunit 11                        | 3.248 |
| 672022268 | KIF21A                         | kinesin family member 21A                                            | 3.359 |
| 672054835 | N/A                            | N/A                                                                  | 3.372 |
| 564312515 | SH3PXD2B                       | SH3 and PX domains 2B                                                | 3.490 |
| 672060073 | CCNT1                          | cyclin T1                                                            | 3.492 |
| 564376498 | N/A                            | N/A                                                                  | 3.511 |
| 392342412 | N/A                            | N/A                                                                  | 3.636 |
| 564309734 | IGSF9B                         | immunoglobulin superfamily member 9B                                 | 3.710 |
| 149046828 | N/A                            | N/A                                                                  | 3.758 |
| 803286756 | N/A                            | N/A                                                                  | 3.794 |
| 392351087 | HAGHL                          | hydroxyacylglutathione hydrolase like                                | 3.871 |
| 307548437 | NYAP2                          | neuronal tyrosine-phosphorylated phosphoinositide-3-kinase adaptor 2 | 4.459 |
| 564297850 | CRTC3                          | CREB regulated transcription coactivator 3                           | 4.524 |
| 164448680 | HBB                            | hemoglobin subunit beta                                              | 4.532 |
| 564307783 | TECPR2                         | tectonin beta-propeller repeat containing 2                          | 4.728 |
| 568906591 | UNC80                          | unc-80 homolog, NALCN channel complex subunit                        | 4.755 |
| 293347435 | PTPRD                          | protein tyrosine phosphatase, receptor type D                        | 4.807 |
| 672023724 | PRICKLE4                       | prickle planar cell polarity protein 4                               | 4.858 |

|           |              |                                                                  |       |
|-----------|--------------|------------------------------------------------------------------|-------|
| 149059823 | N/A          | N/A                                                              | 5.000 |
| 293340128 | MIEF2        | mitochondrial elongation factor 2                                | 5.030 |
| 62644808  | ADAMTSL2     | ADAMTS like 2                                                    | 5.044 |
| 293358899 | ANKRD26      | ankyrin repeat domain 26                                         | 5.087 |
| 564307792 | TECPR2       | tectonin beta-propeller repeat containing 2                      | 5.129 |
| 672020628 | ATXN7L1      | ataxin 7 like 1                                                  | 5.170 |
| 13027424  | TRPV4        | transient receptor potential cation channel subfamily V member 4 | 5.170 |
| 564312627 | ZFP62        | ZFP62 zinc finger protein                                        | 5.170 |
| 564297371 | LOC102556967 | zinc finger protein 484-like                                     | 5.248 |
| 568939804 | N/A          | N/A                                                              | 5.300 |
| 564303143 | KMT2C        | lysine methyltransferase 2C                                      | 5.322 |
| 564308814 | N/A          | N/A                                                              | 5.322 |
| 672023090 | N/A          | N/A                                                              | 5.322 |
| 24962814  | KCNJ14       | potassium voltage-gated channel subfamily J member 14            | 5.375 |
| 564329918 | EMSY         | EMSY, BRCA2 interacting transcriptional repressor                | 5.476 |
| 149052383 | TRIM7        | tripartite motif containing 7                                    | 5.524 |
| 564367862 | Dst          | dystonin                                                         | 5.565 |
| 8394422   | TBXA2R       | thromboxane A2 receptor                                          | 5.672 |
| 392339806 | CFAP69       | cilia and flagella associated protein 69                         | 5.728 |
| 149050030 | MTRF1        | mitochondrial translation release factor 1                       | 5.755 |
| 148696094 | TUBGCP4      | tubulin gamma complex associated protein 4                       | 5.755 |
| 149042274 | ZC3H12B      | zinc finger CCCH-type containing 12B                             | 5.755 |
| 149064065 | ZMYM5        | zinc finger MYM-type containing 5                                | 5.781 |
| 564296586 | Zfp943       | zinc finger protein 943                                          | 5.807 |
| 672017085 | N/A          | N/A                                                              | 5.858 |
| 672063678 | N/A          | N/A                                                              | 5.907 |
| 18677749  | DHRS9        | dehydrogenase/reductase 9                                        | 6.022 |
| 672026875 | N/A          | N/A                                                              | 6.044 |
| 564316929 | FRYL         | FRY like transcription coactivator                               | 6.087 |
| 296473176 | N/A          | N/A                                                              | 6.087 |
| 564341215 | COBLL1       | cordon-bleu WH2 repeat protein like 1                            | 6.109 |
| 293347270 | OSGIN2       | oxidative stress induced growth inhibitor family member 2        | 6.129 |
| 564317927 | SACS         | sacsin molecular chaperone                                       | 6.129 |
| 149050865 | ITSN2        | intersectin 2                                                    | 6.150 |
| 625198911 | N/A          | N/A                                                              | 6.248 |
| 149031942 | N/A          | N/A                                                              | 6.248 |

|           |              |                                                     |       |
|-----------|--------------|-----------------------------------------------------|-------|
| 148702471 | N/A          | N/A                                                 | 6.248 |
| 564315188 | CUX1         | cut like homeobox 1                                 | 6.267 |
| 392340768 | DISP3        | dispatched RND transporter family member 3          | 6.267 |
| 293344867 | N/A          | N/A                                                 | 6.322 |
| 672020363 | N/A          | N/A                                                 | 6.340 |
| 408407614 | DNA2         | DNA replication helicase/nuclease 2                 | 6.358 |
| 672052120 | RBM12B       | RNA binding motif protein 12B                       | 6.358 |
| 672052394 | N/A          | N/A                                                 | 6.358 |
| 672019789 | BTBD19       | BTB domain containing 19                            | 6.375 |
| 6754958   | OTP          | orthopedia homeobox                                 | 6.409 |
| 970703429 | N/A          | N/A                                                 | 6.570 |
| 564312007 | COL6A3       | collagen type VI alpha 3 chain                      | 6.585 |
| 564312944 | KIAA0753     | KIAA0753                                            | 6.585 |
| 293347435 | PTPRD        | protein tyrosine phosphatase, receptor type D       | 6.585 |
| 672051732 | N/A          | N/A                                                 | 6.658 |
| 149055517 | Hmgn5/Hmgn5b | high mobility group nucleosome binding domain 5     | 6.672 |
| 122114537 | VPS13C       | vacuolar protein sorting 13 homolog C               | 6.687 |
| 672013014 | N/A          | N/A                                                 | 6.687 |
| 564318175 | DGKH         | diacylglycerol kinase eta                           | 6.714 |
| 8393418   | GAPDH        | glyceraldehyde-3-phosphate dehydrogenase            | 6.728 |
| 166235131 | MTCL1        | microtubule crosslinking factor 1                   | 6.741 |
| 672049060 | N/A          | N/A                                                 | 6.741 |
| 77404174  | HLA-A        | major histocompatibility complex, class I, A        | 6.755 |
| 672088045 | N/A          | N/A                                                 | 6.755 |
| 672071273 | GRAMD1C      | GRAM domain containing 1C                           | 6.768 |
| 564351511 | RGD1565987   | similar to F-box and leucine-rich repeat protein 18 | 6.768 |
| 149047826 | RIF1         | replication timing regulatory factor 1              | 6.768 |
| 149031942 | N/A          | N/A                                                 | 6.768 |
| 672019792 | N/A          | N/A                                                 | 6.781 |
| 568995287 | MKL2         | MKL1/myocardin like 2                               | 6.807 |
| 564313845 | SLC38A10     | solute carrier family 38 member 10                  | 6.807 |
| 392334596 | RSPH3        | radial spoke head 3 homolog                         | 6.820 |
| 564375742 | SLC26A11     | solute carrier family 26 member 11                  | 6.845 |
| 594061361 | N/A          | N/A                                                 | 6.845 |
| 149042879 | N/A          | N/A                                                 | 6.931 |
| 672088045 | N/A          | N/A                                                 | 6.931 |
| 149020581 | ZNF560       | zinc finger protein 560                             | 6.989 |
| 149038394 | N/A          | N/A                                                 | 7.033 |

|           |              |                                                                    |       |
|-----------|--------------|--------------------------------------------------------------------|-------|
| 157822579 | UCKL1        | uridine-cytidine kinase 1 like 1                                   | 7.044 |
| 564396366 | PCNX2        | pecanex homolog 2                                                  | 7.140 |
| 149026222 | N/A          | N/A                                                                | 7.150 |
| 564305557 | PTPRD        | protein tyrosine phosphatase, receptor type D                      | 7.180 |
| 148666118 | N/A          | N/A                                                                | 7.190 |
| 672029704 | ZCCHC6       | zinc finger CCHC-type containing 6                                 | 7.200 |
| 157818983 | SIRT7        | sirtuin 7                                                          | 7.248 |
| 148670274 | KIAA0368     | KIAA0368                                                           | 7.313 |
| 197333844 | LLPH         | LLP homolog, long-term synaptic facilitation                       | 7.358 |
| 293347435 | PTPRD        | protein tyrosine phosphatase, receptor type D                      | 7.362 |
| 149016584 | ZNF606       | zinc finger protein 606                                            | 7.492 |
| 564301284 | Ttf1         | transcription termination factor, RNA polymerase I                 | 7.524 |
| 755566690 | HUWE1        | HECT, UBA and WWE domain containing 1, E3 ubiquitin protein ligase | 7.555 |
| 564322493 | RPGR         | retinitis pigmentosa GTPase regulator                              | 7.562 |
| 149055413 | ZMAT1        | zinc finger matrin-type 1                                          | 7.570 |
| 672027860 | APBB2        | amyloid beta precursor protein binding family B member 2           | 7.577 |
| 672086880 | N/A          | N/A                                                                | 7.665 |
| 663243313 | N/A          | N/A                                                                | 7.687 |
| 564302105 | ZNF770       | zinc finger protein 770                                            | 7.714 |
| 564329920 | EMSY         | EMSY, BRCA2 interacting transcriptional repressor                  | 7.728 |
| 109492822 | PAXBP1       | PAX3 and PAX7 binding protein 1                                    | 7.735 |
| 149029159 | N/A          | N/A                                                                | 7.768 |
| 672016875 | LOC103690320 | FERM and PDZ domain-containing protein 3                           | 7.801 |
| 672066298 | N/A          | N/A                                                                | 7.807 |
| 149064803 | NHLRC3       | NHL repeat containing 3                                            | 7.852 |
| 62650795  | DACT1        | dishevelled binding antagonist of beta catenin 1                   | 7.895 |
| 149057336 | ZSCAN2       | zinc finger and SCAN domain containing 2                           | 7.925 |
| 672089126 | Kdm5d        | lysine demethylase 5D                                              | 7.943 |
| 564323057 | ARMCX4       | armadillo repeat containing, X-linked 4                            | 7.977 |
| 29500537  | ADAMTS20     | ADAM metallopeptidase with thrombospondin type 1 motif 20          | 8.022 |
| 672069572 | KANSL1       | KAT8 regulatory NSL complex subunit 1                              | 8.087 |
| 300797609 | ELOVL7       | ELOVL fatty acid elongase 7                                        | 8.155 |
| 392331668 | HAGHL        | hydroxyacylglutathione hydrolase like                              | 8.160 |
| 564297387 | Zfp658       | zinc finger protein 658                                            | 8.160 |
| 564314663 | VPS8         | VPS8, CORVET complex subunit                                       | 8.170 |

|                       |               |                                                                                                 |                       |
|-----------------------|---------------|-------------------------------------------------------------------------------------------------|-----------------------|
| 392337738             | LYSMD4        | LysM domain containing 4                                                                        | 8.195                 |
| 293356488             | RIC1          | RIC1 homolog, RAB6A GEF complex partner 1                                                       | 8.209                 |
| 109472884             | UBE3C         | ubiquitin protein ligase E3C                                                                    | 8.238                 |
| 564339233             | LOC100909794  | afadin- and alpha-actinin-binding protein-like                                                  | 8.257                 |
| 755566692             | HUWE1         | HECT, UBA and WWE domain containing 1, E3 ubiquitin protein ligase                              | 8.326                 |
| 392340768             | DISP3         | dispatched RND transporter family member 3                                                      | 8.358                 |
| 564321167             | CHD9          | chromodomain helicase DNA binding protein 9                                                     | 8.430                 |
| 149020413             | Zfp599        | zinc finger protein 599                                                                         | 8.484                 |
| 147907212             | ASAP2         | ArfGAP with SH3 domain, ankyrin repeat and PH domain 2                                          | 8.551                 |
| 672088045             | N/A           | N/A                                                                                             | 8.581                 |
| 6681095               | CYCS          | cytochrome c, somatic                                                                           | 8.676                 |
| 672074697             | ILDR2         | immunoglobulin like domain containing receptor 2                                                | 8.752                 |
| 564377502             | EIF4G1        | eukaryotic translation initiation factor 4 gamma 1                                              | 8.807                 |
| 672029702             | ZCCHC6        | zinc finger CCHC-type containing 6                                                              | 8.830                 |
| 564311685             | PIKFYVE       | phosphoinositide kinase, FYVE-type zinc finger containing                                       | 8.867                 |
| 672074711             | N/A           | N/A                                                                                             | 9.093                 |
| 672023724             | PRICKLE4      | prickle planar cell polarity protein 4                                                          | 9.222                 |
| 672085486             | EGLN1         | egl-9 family hypoxia inducible factor 1                                                         | 9.267                 |
| 109480102             | SMARCC2       | SWI/SNF related, matrix associated, actin dependent regulator of chromatin subfamily c member 2 | 10.050                |
| 38454242              | EIF3H         | eukaryotic translation initiation factor 3 subunit H                                            | 10.430                |
| <b>DEGs in female</b> |               |                                                                                                 |                       |
| <b>ID</b>             | <b>Symbol</b> | <b>Entrez Gene Name</b>                                                                         | <b>Expr Log Ratio</b> |
| 672089449             | N/A           | N/A                                                                                             | -<br>10.534           |
| 564315358             | N/A           | N/A                                                                                             | -9.721                |
| 148675846             | FAM114A2      | family with sequence similarity 114 member A2                                                   | -9.326                |
| 564316241             | CEP170        | centrosomal protein 170                                                                         | -9.267                |
| 148223355             | ASAP2         | ArfGAP with SH3 domain, ankyrin repeat and PH domain 2                                          | -9.238                |

|           |               |                                                                |        |
|-----------|---------------|----------------------------------------------------------------|--------|
| 672027854 | APBB2         | amyloid beta precursor protein binding family B member 2       | -8.607 |
| 884934330 | N/A           | N/A                                                            | -8.607 |
| 564317925 | SACS          | sacsin molecular chaperone                                     | -8.592 |
| 58865558  | TUBA1C        | tubulin alpha 1c                                               | -8.592 |
| 672088045 | N/A           | N/A                                                            | -8.555 |
| 672053062 | FKBP15        | FK506 binding protein 15                                       | -8.547 |
| 568979800 | NPAS3         | neuronal PAS domain protein 3                                  | -8.531 |
| 79750234  | ZFP36L2       | ZFP36 ring finger protein like 2                               | -8.484 |
| 154090947 | NPAS3         | neuronal PAS domain protein 3                                  | -8.476 |
| 149050865 | ITSN2         | intersectin 2                                                  | -8.430 |
| 672088045 | N/A           | N/A                                                            | -8.317 |
| 564388164 | WAPL          | WAPL cohesin release factor                                    | -8.267 |
| 564314997 | IQCE          | IQ motif containing E                                          | -8.229 |
| 672085107 | WDR59         | WD repeat domain 59                                            | -8.200 |
| 672075678 | N/A           | N/A                                                            | -8.129 |
| 564311697 | PIKFYVE       | phosphoinositide kinase, FYVE-type zinc finger containing      | -8.087 |
| 987424694 | N/A           | N/A                                                            | -8.077 |
| 392337738 | LYSMD4        | LysM domain containing 4                                       | -8.061 |
| 293347435 | PTPRD         | protein tyrosine phosphatase, receptor type D                  | -8.061 |
| 109488483 | KIAA0753      | KIAA0753                                                       | -8.017 |
| 149060669 | LRCH3         | leucine rich repeats and calponin homology domain containing 3 | -7.972 |
| 672087657 | N/A           | N/A                                                            | -7.948 |
| 392331954 | KANSL1        | KAT8 regulatory NSL complex subunit 1                          | -7.937 |
| 149020413 | Zfp599        | zinc finger protein 599                                        | -7.931 |
| 913507039 | N/A           | N/A                                                            | -7.907 |
| 884945546 | N/A           | N/A                                                            | -7.845 |
| 564380050 | 2410141K09Rik | RIKEN cDNA 2410141K09 gene                                     | -7.827 |
| 564298047 | GDPD5         | glycerophosphodiester phosphodiesterase domain containing 5    | -7.807 |
| 564306382 | FHAD1         | forkhead associated phosphopeptide binding domain 1            | -7.801 |
| 568914626 | GARNL3        | GTPase activating Rap/RanGAP domain like 3                     | -7.794 |
| 148669850 | GFRA1         | GDNF family receptor alpha 1                                   | -7.781 |
| 392334596 | RSPH3         | radial spoke 3 homolog                                         | -7.768 |
| 672023280 | N/A           | N/A                                                            | -7.735 |
| 31745164  | HAX1          | HCLS1 associated protein X-1                                   | -7.714 |
| 672057084 | N/A           | N/A                                                            | -7.651 |

|           |              |                                                                    |        |
|-----------|--------------|--------------------------------------------------------------------|--------|
| 148676240 | DPH7         | diphthamide biosynthesis 7                                         | -7.622 |
| 148670273 | KIAA0368     | KIAA0368                                                           | -7.615 |
| 148670274 | KIAA0368     | KIAA0368                                                           | -7.577 |
| 68063179  | N/A          | N/A                                                                | -7.577 |
| 755566690 | HUWE1        | HECT, UBA and WWE domain containing 1, E3 ubiquitin protein ligase | -7.570 |
| 154090947 | NPAS3        | neuronal PAS domain protein 3                                      | -7.562 |
| 672039093 | N/A          | N/A                                                                | -7.547 |
| 149029159 | N/A          | N/A                                                                | -7.516 |
| 921126126 | N/A          | N/A                                                                | -7.516 |
| 913486723 | N/A          | N/A                                                                | -7.508 |
| 564309742 | IGSF9B       | immunoglobulin superfamily member 9B                               | -7.500 |
| 148682823 | N/A          | N/A                                                                | -7.492 |
| 564306888 | N/A          | N/A                                                                | -7.476 |
| 28972363  | DOCK4        | dedicator of cytokinesis 4                                         | -7.468 |
| 109480728 | TMEM74       | transmembrane protein 74                                           | -7.468 |
| 392331668 | HAGHL        | hydroxyacylglutathione hydrolase-like                              | -7.435 |
| 564352536 | Szt2         | seizure threshold 2 homolog (mouse)                                | -7.435 |
| 564316929 | FRYL         | FRY like transcription coactivator                                 | -7.426 |
| 149051960 | FLYWCH2      | FLYWCH family member 2                                             | -7.418 |
| 568979796 | NPAS3        | neuronal PAS domain protein 3                                      | -7.349 |
| 564307173 | HEATR5A      | HEAT repeat containing 5A                                          | -7.340 |
| 672013187 | DMWD         | dystrophia myotonica, WD repeat containing                         | -7.313 |
| 564307783 | TECPR2       | tectonin beta-propeller repeat containing 2                        | -7.276 |
| 148675846 | FAM114A2     | family with sequence similarity 114 member A2                      | -7.267 |
| 724831496 | N/A          | N/A                                                                | -7.267 |
| 755566692 | HUWE1        | HECT, UBA and WWE domain containing 1, E3 ubiquitin protein ligase | -7.238 |
| 672084304 | N/A          | N/A                                                                | -7.238 |
| 564375502 | Mxra7        | matrix-remodelling associated 7                                    | -7.209 |
| 564310188 | IGDCC4       | immunoglobulin superfamily DCC subclass member 4                   | -7.170 |
| 564320724 | Fbxo38       | F-box protein 38                                                   | -7.150 |
| 755531756 | N/A          | N/A                                                                | -7.109 |
| 149055517 | Hmgn5/Hmgn5b | high mobility group nucleosome binding domain 5B                   | -7.087 |
| 947311993 | N/A          | N/A                                                                | -7.077 |
| 694937047 | ARPC5L       | actin related protein 2/3 complex subunit 5 like                   | -7.066 |
| 564313510 | BPTF         | bromodomain PHD finger transcription factor                        | -7.044 |
| 672088045 | N/A          | N/A                                                                | -7.033 |

|           |          |                                                       |        |
|-----------|----------|-------------------------------------------------------|--------|
| 672031167 | C19orf57 | chromosome 19 open reading frame 57                   | -7.011 |
| 672052394 | N/A      | N/A                                                   | -7.000 |
| 148694630 | N/A      | N/A                                                   | -6.977 |
| 149041058 | RCOR3    | REST corepressor 3                                    | -6.966 |
| 149054804 | N/A      | N/A                                                   | -6.954 |
| 564314389 | DZIP3    | DAZ interacting zinc finger protein 3                 | -6.919 |
| 392339806 | CFAP69   | cilia and flagella associated protein 69              | -6.907 |
| 293344558 | PCNX3    | pecanex homolog 3 (Drosophila)                        | -6.895 |
| 672042306 | N/A      | N/A                                                   | -6.891 |
| 672023474 | NKTR     | natural killer cell triggering receptor               | -6.858 |
| 122114537 | VPS13C   | vacuolar protein sorting 13 homolog C                 | -6.845 |
| 672050496 | IQSEC1   | IQ motif and Sec7 domain 1                            | -6.833 |
| 564301284 | Ttf1     | transcription termination factor, RNA polymerase I    | -6.807 |
| 625198911 | N/A      | N/A                                                   | -6.781 |
| 392339806 | CFAP69   | cilia and flagella associated protein 69              | -6.741 |
| 62198215  | C4BPB    | complement component 4 binding protein beta           | -6.728 |
| 34877176  | GPRIN2   | G protein regulated inducer of neurite outgrowth 2    | -6.728 |
| 564367862 | Dst      | dystonin                                              | -6.714 |
| 149035005 | IQCE     | IQ motif containing E                                 | -6.693 |
| 568961599 | VPS13C   | vacuolar protein sorting 13 homolog C                 | -6.672 |
| 564313180 | HLF      | HLF, PAR bZIP transcription factor                    | -6.658 |
| 672040275 | CPEB3    | cytoplasmic polyadenylation element binding protein 3 | -6.644 |
| 672074697 | ILDR2    | immunoglobulin like domain containing receptor 2      | -6.615 |
| 294610780 | SYNE2    | spectrin repeat containing nuclear envelope protein 2 | -6.615 |
| 62078965  | SLC47A1  | solute carrier family 47 member 1                     | -6.585 |
| 884945546 | N/A      | N/A                                                   | -6.585 |
| 154090947 | NPAS3    | neuronal PAS domain protein 3                         | -6.570 |
| 564305252 | FBXO10   | F-box protein 10                                      | -6.508 |
| 564302768 | KIAA1755 | KIAA1755                                              | -6.508 |
| 672023724 | PRICKLE4 | prickle planar cell polarity protein 4                | -6.476 |
| 149053275 | N/A      | N/A                                                   | -6.476 |
| 672035395 | DMWD     | dystrophia myotonica, WD repeat containing            | -6.443 |
| 564381298 | KIAA1614 | KIAA1614                                              | -6.443 |
| 672063678 | N/A      | N/A                                                   | -6.443 |
| 564317925 | SACS     | sacsin molecular chaperone                            | -6.392 |



|           |          |                                                |        |
|-----------|----------|------------------------------------------------|--------|
| 149057336 | ZSCAN2   | zinc finger and SCAN domain containing 2       | -6.285 |
| 672074711 | N/A      | N/A                                            | -6.285 |
| 293344988 | CCDC138  | coiled-coil domain containing 138              | -6.267 |
| 148679862 | SLC35F3  | solute carrier family 35 member F3             | -6.267 |
| 149052470 | ZNF454   | zinc finger protein 454                        | -6.248 |
| 672082610 | N/A      | N/A                                            | -6.170 |
| 140969817 | BPTF     | bromodomain PHD finger transcription factor    | -6.098 |
| 569009290 | TENM1    | teneurin transmembrane protein 1               | -6.044 |
| 672084304 | N/A      | N/A                                            | -5.977 |
| 672026875 | N/A      | N/A                                            | -5.931 |
| 672065933 | DOCK10   | dedicator of cytokinesis 10                    | -5.907 |
| 47058988  | TOMM70   | translocase of outer mitochondrial membrane 70 | -5.888 |
| 672026416 | PRR36    | proline rich 36                                | -5.883 |
| 672017191 | N/A      | N/A                                            | -5.858 |
| 564313516 | BPTF     | bromodomain PHD finger transcription factor    | -5.833 |
| 672024381 | N/A      | N/A                                            | -5.781 |
| 564347830 | ZXDC     | ZXD family zinc finger C                       | -5.700 |
| 37360610  | FMNL3    | formin like 3                                  | -5.693 |
| 157818655 | MPZL2    | myelin protein zero like 2                     | -5.672 |
| 392332008 | SLC38A10 | solute carrier family 38 member 10             | -5.672 |
| 672029704 | ZCCHC6   | zinc finger CCHC-type containing 6             | -5.640 |
| 149031942 | N/A      | N/A                                            | -5.555 |
| 755548575 | N/A      | N/A                                            | -5.524 |
| 207522    | TNNT2    | troponin T2, cardiac type                      | -5.403 |
| 21426773  | ASPG     | asparaginase                                   | -5.392 |
| 149067796 | TMEM219  | transmembrane protein 219                      | -5.392 |
| 755519636 | ZNF536   | zinc finger protein 536                        | -5.358 |
| 564393142 | WDR36    | WD repeat domain 36                            | -5.248 |
| 149024772 | N/A      | N/A                                            | -5.209 |
| 149031942 | N/A      | N/A                                            | -5.129 |
| 564303143 | KMT2C    | lysine methyltransferase 2C                    | -5.044 |
| 157822843 | WNT6     | Wnt family member 6                            | -5.030 |
| 293341811 | PRR14L   | proline rich 14 like                           | -4.907 |
| 149042274 | ZC3H12B  | zinc finger CCCH-type containing 12B           | -4.907 |
| 140969817 | BPTF     | bromodomain PHD finger transcription factor    | -4.858 |
| 672031484 | PCNX2    | pecanex homolog 2 (Drosophila)                 | -4.858 |
| 148684403 | N/A      | N/A                                            | -4.858 |
| 568941572 | IQSEC1   | IQ motif and Sec7 domain 1                     | -4.807 |
| 55741514  | TSEN34   | tRNA splicing endonuclease subunit 34          | -4.780 |

|           |            |                                                             |        |
|-----------|------------|-------------------------------------------------------------|--------|
| 568977658 | ASAP2      | ArfGAP with SH3 domain, ankyrin repeat and PH domain 2      | -4.720 |
| 564367862 | Dst        | dystonin                                                    | -4.700 |
| 149067879 | NUPR1      | nuclear protein 1, transcriptional regulator                | -4.591 |
| 109460021 | KIAA2026   | KIAA2026                                                    | -4.585 |
| 625217108 | N/A        | N/A                                                         | -4.433 |
| 564313508 | BPTF       | bromodomain PHD finger transcription factor                 | -4.392 |
| 392348187 | LRP8       | LDL receptor related protein 8                              | -4.392 |
| 16758400  | KCNJ13     | potassium voltage-gated channel subfamily J member 13       | -4.256 |
| 156119589 | FOXC2      | forkhead box C2                                             | -4.209 |
| 564313782 | Tha1       | threonine aldolase 1                                        | -4.157 |
| 564313676 | FBF1       | Fas binding factor 1                                        | -4.150 |
| 672035060 | CIC        | capicua transcriptional repressor                           | -3.861 |
| 149018115 | N/A        | N/A                                                         | -3.845 |
| 564307245 | MIA2       | melanoma inhibitory activity 2                              | -3.815 |
| 149064065 | ZMYM5      | zinc finger MYM-type containing 5                           | -3.661 |
| 672041794 | RGD1310081 | similar to hypothetical protein FLJ13231                    | -3.585 |
| 148703035 | CLDN11     | claudin 11                                                  | -3.579 |
| 6981430   | PTGDS      | prostaglandin D2 synthase                                   | -3.532 |
| 564315188 | CUX1       | cut like homeobox 1                                         | -3.459 |
| 62079023  | ADTRP      | androgen dependent TFPI regulating protein                  | -3.435 |
| 21326469  | SLC15A3    | solute carrier family 15 member 3                           | -3.322 |
| 672022290 | KIF21A     | kinesin family member 21A                                   | -3.303 |
| 189083739 | ANKS4B     | ankyrin repeat and sterile alpha motif domain containing 4B | -3.298 |
| 672072352 | Evi5l      | ecotropic viral integration site 5 like                     | -3.280 |
| 157817652 | BNC2       | basonuclin 2                                                | -3.273 |
| 58331126  | GJB6       | gap junction protein beta 6                                 | -3.262 |
| 663434101 | CUX1       | cut like homeobox 1                                         | -3.222 |
| 293351303 | METTL22    | methyltransferase like 22                                   | -3.205 |
| 832626572 | CHI3L1     | chitinase 3 like 1                                          | -3.193 |
| 149066285 | PHF20L1    | PHD finger protein 20-like 1                                | -3.179 |
| 71896590  | AOC3       | amine oxidase, copper containing 3                          | -3.170 |
| 74202463  | EYA2       | EYA transcriptional coactivator and phosphatase 2           | -3.152 |
| 149016131 | N/A        | N/A                                                         | -3.136 |
| 255982585 | DIO3       | iodothyronine deiodinase 3                                  | -3.037 |
| 564311681 | PIKFYVE    | phosphoinositide kinase, FYVE-type zinc finger containing   | -3.016 |

|           |              |                                                   |        |
|-----------|--------------|---------------------------------------------------|--------|
| 194474002 | MEI1         | meiotic double-stranded break formation protein 1 | -2.970 |
| 672087499 | N/A          | N/A                                               | -2.928 |
| 274321177 | MCM4         | minichromosome maintenance complex component 4    | -2.844 |
| 148702636 | SPHK1        | sphingosine kinase 1                              | -2.829 |
| 568964944 | EPB41L2      | erythrocyte membrane protein band 4.1 like 2      | -2.823 |
| 564324736 | L3MBTL3      | l(3)mbt-like 3 (Drosophila)                       | -2.759 |
| 827012496 | NLRC4        | NLR family CARD domain containing 4               | -2.652 |
| 157820611 | INSC         | inscuteable homolog (Drosophila)                  | -2.609 |
| 672075760 | RASSF6       | Ras association domain family member 6            | -2.605 |
| 274315796 | SNTB2        | syntrophin beta 2                                 | -2.602 |
| 162138928 | SLC13A3      | solute carrier family 13 member 3                 | -2.596 |
| 57527344  | OASL         | 2'-5'-oligoadenylate synthetase like              | -2.585 |
| 149054972 | SLC26A11     | solute carrier family 26 member 11                | -2.567 |
| 672053075 | N/A          | N/A                                               | -2.555 |
| 564314671 | VPS8         | VPS8, CORVET complex subunit                      | -2.531 |
| 672028646 | N/A          | N/A                                               | -2.521 |
| 157819447 | HYKK         | hydroxylysine kinase                              | -2.515 |
| 755551565 | CSMD3        | CUB and Sushi multiple domains 3                  | -2.503 |
| 195540030 | Tnxa-ps1     | tenascin XA, pseudogene 1                         | -2.500 |
| 672062667 | N/A          | N/A                                               | -2.459 |
| 8393733   | LOX          | lysyl oxidase                                     | -2.445 |
| 148689488 | SYN3         | synapsin III                                      | -2.438 |
| 209571549 | RNF43        | ring finger protein 43                            | -2.433 |
| 564312515 | SH3PXD2B     | SH3 and PX domains 2B                             | -2.418 |
| 60460909  | SLC13A4      | solute carrier family 13 member 4                 | -2.405 |
| 564342627 | TP53BP1      | tumor protein p53 binding protein 1               | -2.392 |
| 672088296 | N/A          | N/A                                               | -2.390 |
| 564390739 | N/A          | N/A                                               | -2.382 |
| 112984202 | FZD8         | frizzled class receptor 8                         | -2.375 |
| 672033554 | LOC102557335 | uncharacterized LOC102557335                      | -2.368 |
| 672029117 | N/A          | N/A                                               | -2.367 |
| 6981628   | TACR1        | tachykinin receptor 1                             | -2.361 |
| 19424240  | PCSK4        | proprotein convertase subtilisin/kexin type 4     | -2.337 |
| 672079259 | N/A          | N/A                                               | -2.312 |
| 148702471 | N/A          | N/A                                               | -2.229 |
| 109495817 | GLT1D1       | glycosyltransferase 1 domain containing 1         | -2.228 |
| 58865522  | TEKT2        | tektin 2                                          | -2.228 |
| 25742828  | SCN7A        | sodium voltage-gated channel alpha subunit 7      | -2.202 |

|           |                     |                                                            |        |
|-----------|---------------------|------------------------------------------------------------|--------|
| 148664561 | DTNA                | dystrobrevin alpha                                         | -2.190 |
| 672022282 | KIF21A              | kinesin family member 21A                                  | -2.181 |
| 16758354  | TINAGL1             | tubulointerstitial nephritis antigen like 1                | -2.178 |
| 194239635 | Tpsab1              | tryptase alpha/beta 1                                      | -2.176 |
| 13929066  | CPZ                 | carboxypeptidase Z                                         | -2.170 |
| 25453404  | Crabp2/LOC100911902 | cellular retinoic acid binding protein 2                   | -2.168 |
| 625206860 | N/A                 | N/A                                                        | -2.159 |
| 157816965 | DKK2                | dickkopf WNT signaling pathway inhibitor 2                 | -2.144 |
| 672022268 | KIF21A              | kinesin family member 21A                                  | -2.143 |
| 672029435 | N/A                 | N/A                                                        | -2.140 |
| 226823227 | UBE2T               | ubiquitin conjugating enzyme E2 T                          | -2.139 |
| 158303341 | MPP4                | membrane palmitoylated protein 4                           | -2.138 |
| 6981068   | ICAM1               | intercellular adhesion molecule 1                          | -2.133 |
| 9506725   | GJA5                | gap junction protein alpha 5                               | -2.127 |
| 564336264 | BBS12               | Bardet-Biedl syndrome 12                                   | -2.126 |
| 18677739  | CDKN2B              | cyclin dependent kinase inhibitor 2B                       | -2.121 |
| 672019901 | LOC100361036        | rCG31267-like                                              | -2.121 |
| 54312106  | ZNF705A             | zinc finger protein 705A                                   | -2.107 |
| 148675846 | FAM114A2            | family with sequence similarity 114 member A2              | -2.092 |
| 672025368 | BPTF                | bromodomain PHD finger transcription factor                | -2.074 |
| 48675870  | PPP1R3B             | protein phosphatase 1 regulatory subunit 3B                | -2.066 |
| 149044855 | N/A                 | N/A                                                        | -2.062 |
| 672047351 | RALGAPA2            | Ral GTPase activating protein catalytic alpha subunit 2    | -2.023 |
| 149042879 | N/A                 | N/A                                                        | -2.018 |
| 58293772  | AMY2A               | amylase, alpha 2A (pancreatic)                             | -2.012 |
| 58865654  | EFEMP1              | EGF containing fibulin like extracellular matrix protein 1 | -2.006 |
| 8393186   | CPS1                | carbamoyl-phosphate synthase 1                             | -2.000 |
| 577861042 | PTGS1               | prostaglandin-endoperoxide synthase 1                      | -2.000 |
| 293351303 | METTL22             | methyltransferase like 22                                  | -1.995 |
| 970699122 | N/A                 | N/A                                                        | -1.989 |
| 300795477 | PDZD3               | PDZ domain containing 3                                    | -1.983 |
| 480306394 | Mcpt4               | mast cell protease 4                                       | -1.978 |
| 672013187 | DMWD                | dystrophia myotonica, WD repeat containing                 | -1.977 |
| 58865768  | XKR8                | XK related 8                                               | -1.972 |
| 568933200 | WDR86               | WD repeat domain 86                                        | -1.957 |
| 158138505 | SLC5A5              | solute carrier family 5 member 5                           | -1.954 |
| 149060001 | N/A                 | N/A                                                        | -1.951 |

|           |               |                                                      |        |
|-----------|---------------|------------------------------------------------------|--------|
| 157786780 | MELTF         | melanotransferrin                                    | -1.942 |
| 672029702 | ZCCHC6        | zinc finger CCHC-type containing 6                   | -1.917 |
| 149017274 | N/A           | N/A                                                  | -1.914 |
| 392332921 | N/A           | N/A                                                  | -1.911 |
| 672022657 | N/A           | N/A                                                  | -1.891 |
| 564297387 | Zfp658        | zinc finger protein 658                              | -1.890 |
| 158186711 | F13A1         | coagulation factor XIII A chain                      | -1.886 |
| 672032217 | REPS2         | RALBP1 associated Eps domain containing 2            | -1.883 |
| 149053435 | N/A           | N/A                                                  | -1.883 |
| 149042883 | LOC100365365  | rCG32328-like                                        | -1.882 |
| 564342320 | FSIP1         | fibrous sheath interacting protein 1                 | -1.881 |
| 226958688 | RBP4          | retinol binding protein 4                            | -1.867 |
| 149061735 | IGF2          | insulin like growth factor 2                         | -1.858 |
| 149050087 | N/A           | N/A                                                  | -1.848 |
| 293341722 | N/A           | N/A                                                  | -1.840 |
| 672082610 | N/A           | N/A                                                  | -1.830 |
| 18959230  | SLC6A20       | solute carrier family 6 member 20                    | -1.823 |
| 672017085 | N/A           | N/A                                                  | -1.820 |
| 300798520 | PRRG1         | proline rich and Gla domain 1                        | -1.812 |
| 672062795 | N/A           | N/A                                                  | -1.811 |
| 564312009 | COL6A3        | collagen type VI alpha 3 chain                       | -1.801 |
| 55741827  | TERT          | telomerase reverse transcriptase                     | -1.801 |
| 169234643 | SLC16A11      | solute carrier family 16 member 11                   | -1.797 |
| 31542125  | ALOX15        | arachidonate 15-lipoxygenase                         | -1.796 |
| 76443687  | SLC4A1        | solute carrier family 4 member 1 (Diego blood group) | -1.794 |
| 149024371 | SH2D5         | SH2 domain containing 5                              | -1.778 |
| 564395676 | CDH3          | cadherin 3                                           | -1.766 |
| 672085823 | N/A           | N/A                                                  | -1.762 |
| 564317122 | CC2D2A        | coiled-coil and C2 domain containing 2A              | -1.755 |
| 564356749 | N/A           | N/A                                                  | -1.753 |
| 564321163 | CHD9          | chromodomain helicase DNA binding protein 9          | -1.750 |
| 297374767 | TPSAB1/TPSB2  | tryptase alpha/beta 1                                | -1.750 |
| 295391913 | LOC100366054  | Da1-10-like                                          | -1.742 |
| 532056233 | N/A           | N/A                                                  | -1.739 |
| 157823213 | CAPSL         | calcyphosine like                                    | -1.732 |
| 537264393 | N/A           | N/A                                                  | -1.726 |
| 148704234 | GJB2          | gap junction protein beta 2                          | -1.724 |
| 564380050 | 2410141K09Rik | RIKEN cDNA 2410141K09 gene                           | -1.712 |
| 157823809 | CD163         | CD163 molecule                                       | -1.710 |

|           |              |                                                       |        |
|-----------|--------------|-------------------------------------------------------|--------|
| 564315753 | N/A          | N/A                                                   | -1.689 |
| 61557187  | Apol3        | apolipoprotein L, 3                                   | -1.688 |
| 157819493 | Igbp1b       | immunoglobulin (CD79A) binding protein 1b             | -1.681 |
| 397787567 | BDKRB2       | bradykinin receptor B2                                | -1.678 |
| 672043249 | DENND4B      | DENN domain containing 4B                             | -1.673 |
| 6981176   | MAK          | male germ cell associated kinase                      | -1.670 |
| 672022651 | N/A          | N/A                                                   | -1.667 |
| 672028781 | NAA16        | N(alpha)-acetyltransferase 16, NatA auxiliary subunit | -1.666 |
| 672074150 | N/A          | N/A                                                   | -1.665 |
| 149055413 | ZMAT1        | zinc finger matrin-type 1                             | -1.660 |
| 149053793 | TSPOAP1      | TSPO associated protein 1                             | -1.659 |
| 68163517  | CCDC146      | coiled-coil domain containing 146                     | -1.652 |
| 564297823 | KIF7         | kinesin family member 7                               | -1.650 |
| 155369293 | AEBP1        | AE binding protein 1                                  | -1.644 |
| 218156285 | CFB          | complement factor B                                   | -1.641 |
| 149052383 | TRIM7        | tripartite motif containing 7                         | -1.639 |
| 672034794 | N/A          | N/A                                                   | -1.636 |
| 156347833 | N/A          | N/A                                                   | -1.635 |
| 67846074  | EHD2         | EH domain containing 2                                | -1.629 |
| 672045595 | RIF1         | replication timing regulatory factor 1                | -1.618 |
| 6980976   | GPC3         | glypican 3                                            | -1.609 |
| 564337843 | LOC100363520 | mCG16729-like                                         | -1.609 |
| 672028287 | Kat6b        | K(lysine) acetyltransferase 6B                        | -1.608 |
| 42476116  | FBLN5        | fibulin 5                                             | -1.598 |
| 62644808  | ADAMTSL2     | ADAMTS like 2                                         | -1.593 |
| 672038314 | N/A          | N/A                                                   | -1.591 |
| 148675846 | FAM114A2     | family with sequence similarity 114 member A2         | -1.585 |
| 564313512 | N/A          | N/A                                                   | -1.585 |
| 149064803 | NHLRC3       | NHL repeat containing 3                               | -1.580 |
| 568972622 | BPTF         | bromodomain PHD finger transcription factor           | -1.576 |
| 568941576 | IQSEC1       | IQ motif and Sec7 domain 1                            | -1.575 |
| 9506461   | CAPN1        | calpain 1                                             | -1.574 |
| 655644820 | N/A          | N/A                                                   | -1.572 |
| 6981280   | NPR1         | natriuretic peptide receptor 1                        | -1.562 |
| 187281975 | DENND1C      | DENN domain containing 1C                             | -1.559 |
| 148686343 | MRGPRF       | MAS related GPR family member F                       | -1.547 |
| 564312671 | N/A          | N/A                                                   | -1.546 |
| 672083480 | TNFAIP8      | TNF alpha induced protein 8                           | -1.545 |
| 9910378   | CDC42SE2     | CDC42 small effector 2                                | -1.544 |

|           |                                |                                                                                                 |        |
|-----------|--------------------------------|-------------------------------------------------------------------------------------------------|--------|
| 672085160 | N/A                            | N/A                                                                                             | -1.537 |
| 564320724 | Fbxo38                         | F-box protein 38                                                                                | -1.532 |
| 56961645  | Fcna                           | ficolin A                                                                                       | -1.532 |
| 51491891  | CASP6                          | caspase 6                                                                                       | -1.524 |
| 451770406 | Nlrp1a                         | NLR family, pyrin domain containing 1A                                                          | -1.524 |
| 225735575 | ALDH1A2                        | aldehyde dehydrogenase 1 family member A2                                                       | -1.521 |
| 1698696   | CMA1                           | chymase 1                                                                                       | -1.521 |
| 157823171 | NME4                           | NME/NM23 nucleoside diphosphate kinase 4                                                        | -1.520 |
| 281371494 | LAMC2                          | laminin subunit gamma 2                                                                         | -1.518 |
| 148680846 | HIC1                           | HIC ZBTB transcriptional repressor 1                                                            | -1.507 |
| 672066486 | SHISA9                         | shisa family member 9                                                                           | -1.507 |
| 2231145   | N/A                            | N/A                                                                                             | -1.499 |
| 157821719 | CPM                            | carboxypeptidase M                                                                              | -1.498 |
| 57516     | ATAD3B                         | ATPase family, AAA domain containing 3B                                                         | -1.497 |
| 109480098 | SMARCC2                        | SWI/SNF related, matrix associated, actin dependent regulator of chromatin subfamily c member 2 | -1.490 |
| 157823079 | RBKS                           | ribokinase                                                                                      | -1.484 |
| 672070303 | N/A                            | N/A                                                                                             | -1.481 |
| 568924481 | COL25A1                        | collagen type XXV alpha 1 chain                                                                 | -1.470 |
| 672071704 | N/A                            | N/A                                                                                             | -1.470 |
| 564298020 | KCTD14                         | potassium channel tetramerization domain containing 14                                          | -1.461 |
| 672053969 | Ccdc30                         | coiled-coil domain containing 30                                                                | -1.459 |
| 157820793 | RTBDN                          | retbindin                                                                                       | -1.452 |
| 672063745 | SEC22C                         | SEC22 homolog C, vesicle trafficking protein                                                    | -1.446 |
| 768033504 | KDM6A                          | lysine demethylase 6A                                                                           | -1.442 |
| 672054310 | N/A                            | N/A                                                                                             | -1.442 |
| 564366187 | LOC100361039 (includes others) | similar to nidogen 2                                                                            | -1.441 |
| 564300462 | DCHS2                          | dachsous cadherin-related 2                                                                     | -1.430 |
| 148694035 | SENp8                          | SUMO/sentrin peptidase family member, NEDD8 specific                                            | -1.427 |
| 672018107 | N/A                            | N/A                                                                                             | -1.426 |
| 213512704 | CPA3                           | carboxypeptidase A3                                                                             | -1.424 |
| 672088045 | N/A                            | N/A                                                                                             | -1.421 |
| 399154114 | KPNA2                          | karyopherin subunit alpha 2                                                                     | -1.399 |
| 672023090 | N/A                            | N/A                                                                                             | -1.391 |
| 672020326 | MTA3                           | metastasis associated 1 family member 3                                                         | -1.390 |
| 149053909 | COL1A1                         | collagen type I alpha 1 chain                                                                   | -1.388 |

|           |                                |                                                         |        |
|-----------|--------------------------------|---------------------------------------------------------|--------|
| 197384727 | Smco4                          | single-pass membrane protein with coiled-coil domains 4 | -1.384 |
| 201861483 | LOC102548396 (includes others) | zinc finger protein 951                                 | -1.382 |
| 672029180 | CCSER2                         | coiled-coil serine rich protein 2                       | -1.381 |
| 149016574 | ZNF324                         | zinc finger protein 324                                 | -1.381 |
| 564297942 | LOC103690302                   | AF4/FMR2 family member 2                                | -1.379 |
| 149018731 | TMEM108                        | transmembrane protein 108                               | -1.378 |
| 392339874 | SLC37A3                        | solute carrier family 37 member 3                       | -1.374 |
| 564310551 | N/A                            | N/A                                                     | -1.371 |
| 293346251 | TMEM62                         | transmembrane protein 62                                | -1.368 |
| 13929084  | THBD                           | thrombomodulin                                          | -1.366 |
| 672064087 | N/A                            | N/A                                                     | -1.365 |
| 54020664  | DCN                            | decorin                                                 | -1.358 |
| 149051391 | N/A                            | N/A                                                     | -1.356 |
| 564350417 | SLC26A7                        | solute carrier family 26 member 7                       | -1.355 |
| 40018618  | CBX7                           | chromobox 7                                             | -1.354 |
| 672044124 | N/A                            | N/A                                                     | -1.350 |
| 320089574 | FAM161A                        | family with sequence similarity 161 member A            | -1.342 |
| 564320621 | DMXL1                          | Dmx like 1                                              | -1.340 |
| 16758284  | SLC5A7                         | solute carrier family 5 member 7                        | -1.340 |
| 149045275 | EXOC2                          | exocyst complex component 2                             | -1.335 |
| 564325156 | SYNE1                          | spectrin repeat containing nuclear envelope protein 1   | -1.323 |
| 149054264 | N/A                            | N/A                                                     | -1.322 |
| 16758080  | COL1A2                         | collagen type I alpha 2 chain                           | -1.318 |
| 149069514 | N/A                            | N/A                                                     | -1.318 |
| 672064422 | N/A                            | N/A                                                     | -1.318 |
| 568941586 | IQSEC1                         | IQ motif and Sec7 domain 1                              | -1.317 |
| 392338492 | TMEM161B                       | transmembrane protein 161B                              | -1.313 |
| 25742776  | MC4R                           | melanocortin 4 receptor                                 | -1.309 |
| 189163513 | SH2D1A                         | SH2 domain containing 1A                                | -1.308 |
| 113205500 | STAT6                          | signal transducer and activator of transcription 6      | -1.304 |
| 51260641  | Ugt1a7c                        | UDP glucuronosyltransferase 1 family, polypeptide A7C   | -1.302 |
| 564299864 | N/A                            | N/A                                                     | -1.302 |
| 149020413 | Zfp599                         | zinc finger protein 599                                 | -1.300 |
| 148664646 | GYPC                           | glycophorin C (Gerbich blood group)                     | -1.298 |
| 300794610 | PGM5                           | phosphoglucomutase 5                                    | -1.298 |



|           |                      |                                                           |        |
|-----------|----------------------|-----------------------------------------------------------|--------|
| 145046230 | SPP1                 | secreted phosphoprotein 1                                 | -1.293 |
| 149046828 | N/A                  | N/A                                                       | -1.292 |
| 672028781 | NAA16                | N(alpha)-acetyltransferase 16, NatA auxiliary subunit     | -1.290 |
| 564311658 | N/A                  | N/A                                                       | -1.290 |
| 564395350 | N/A                  | N/A                                                       | -1.284 |
| 672066092 | UNC80                | unc-80 homolog, NALCN activator                           | -1.273 |
| 13591940  | DPYD                 | dihydropyrimidine dehydrogenase                           | -1.272 |
| 149050030 | MTRF1                | mitochondrial translation release factor 1                | -1.269 |
| 194097493 | EVA1B                | eva-1 homolog B                                           | -1.263 |
| 672022615 | N/A                  | N/A                                                       | -1.263 |
| 564317722 | N/A                  | N/A                                                       | -1.259 |
| 149056256 | FXVD5                | FXVD domain containing ion transport regulator 5          | -1.254 |
| 401709944 | MPP7                 | membrane palmitoylated protein 7                          | -1.252 |
| 119226202 | CDC42EP1             | CDC42 effector protein 1                                  | -1.251 |
| 764020103 | ROBO4                | roundabout guidance receptor 4                            | -1.251 |
| 13786164  | CDH1                 | cadherin 1                                                | -1.250 |
| 66730337  | NMRK1                | nicotinamide riboside kinase 1                            | -1.250 |
| 149025029 | SUSD6                | sushi domain containing 6                                 | -1.250 |
| 30794230  | TNFRSF1B             | TNF receptor superfamily member 1B                        | -1.248 |
| 157821829 | POLI                 | DNA polymerase iota                                       | -1.244 |
| 71043760  | RRM2                 | ribonucleotide reductase regulatory subunit M2            | -1.243 |
| 564396113 | ZCCHC14              | zinc finger CCHC-type containing 14                       | -1.241 |
| 149021126 | MRC1                 | mannose receptor C-type 1                                 | -1.240 |
| 62656582  | KIAA0100             | KIAA0100                                                  | -1.237 |
| 149044212 | N/A                  | N/A                                                       | -1.237 |
| 392334002 | CCDC3                | coiled-coil domain containing 3                           | -1.236 |
| 672061705 | KMT2A                | lysine methyltransferase 2A                               | -1.236 |
| 268607712 | SNED1                | sushi, nidogen and EGF like domains 1                     | -1.235 |
| 564297338 | ZNF816               | zinc finger protein 816                                   | -1.235 |
| 589934569 | N/A                  | N/A                                                       | -1.234 |
| 537174241 | N/A                  | N/A                                                       | -1.230 |
| 148701441 | N/A                  | N/A                                                       | -1.227 |
| 537234259 | N/A                  | N/A                                                       | -1.226 |
| 672044124 | N/A                  | N/A                                                       | -1.223 |
| 19424348  | SLC6A13              | solute carrier family 6 member 13                         | -1.220 |
| 392334475 | RGD1560020_predicted | similar to Myb proto-oncogene protein (C-myb) (predicted) | -1.213 |
| 13540656  | EMP3                 | epithelial membrane protein 3                             | -1.209 |

|           |                      |                                                                |        |
|-----------|----------------------|----------------------------------------------------------------|--------|
| 28461151  | SLC1A5               | solute carrier family 1 member 5                               | -1.203 |
| 157823801 | SLC50A1              | solute carrier family 50 member 1                              | -1.200 |
| 66730475  | Tpm2                 | tropomyosin 2, beta                                            | -1.196 |
| 564307792 | TECPR2               | tectonin beta-propeller repeat containing 2                    | -1.194 |
| 6981108   | ITGB4                | integrin subunit beta 4                                        | -1.190 |
| 564320606 | SEMA6A               | semaphorin 6A                                                  | -1.189 |
| 300798598 | MYOF                 | myoferlin                                                      | -1.183 |
| 82617598  | SLC5A3               | solute carrier family 5 member 3                               | -1.182 |
| 157820637 | LYVE1                | lymphatic vessel endothelial hyaluronan receptor 1             | -1.180 |
| 293358899 | ANKRD26              | ankyrin repeat domain 26                                       | -1.174 |
| 564314685 | EIF4G1               | eukaryotic translation initiation factor 4 gamma 1             | -1.168 |
| 197313645 | SMTN                 | smoothelin                                                     | -1.167 |
| 564326123 | CDC42EP5             | CDC42 effector protein 5                                       | -1.166 |
| 6978807   | EMP1                 | epithelial membrane protein 1                                  | -1.164 |
| 6978773   | DPP4                 | dipeptidyl peptidase 4                                         | -1.161 |
| 672022611 | KIAA0895             | KIAA0895                                                       | -1.161 |
| 29789140  | GRM6                 | glutamate metabotropic receptor 6                              | -1.152 |
| 309319796 | COL18A1              | collagen type XVIII alpha 1 chain                              | -1.151 |
| 392352101 | LRCH3                | leucine rich repeats and calponin homology domain containing 3 | -1.150 |
| 569012000 | KLF8                 | Kruppel like factor 8                                          | -1.148 |
| 18777755  | Slco1a4              | solute carrier organic anion transporter family, member 1a4    | -1.148 |
| 157821541 | ACSS3                | acyl-CoA synthetase short-chain family member 3                | -1.145 |
| 157819945 | ARPIN/C15orf38-AP3S2 | C15orf38-AP3S2 readthrough                                     | -1.140 |
| 1763306   | UNC13C               | unc-13 homolog C                                               | -1.140 |
| 157818625 | SLC2A12              | solute carrier family 2 member 12                              | -1.139 |
| 149039662 | LAMA2                | laminin subunit alpha 2                                        | -1.137 |
| 392332010 | SLC38A10             | solute carrier family 38 member 10                             | -1.136 |
| 148691168 | N/A                  | N/A                                                            | -1.136 |
| 564340633 | OLFML2A              | olfactomedin like 2A                                           | -1.132 |
| 71043880  | COLEC12              | collectin subfamily member 12                                  | -1.130 |
| 157823857 | SSPN                 | sarcospan                                                      | -1.129 |
| 564315959 | CEP350               | centrosomal protein 350                                        | -1.126 |
| 672046728 | N/A                  | N/A                                                            | -1.124 |
| 68163370  | CARNMT1              | carnosine N-methyltransferase 1                                | -1.123 |

|           |              |                                                               |        |
|-----------|--------------|---------------------------------------------------------------|--------|
| 426352061 | N/A          | N/A                                                           | -1.121 |
| 672088045 | N/A          | N/A                                                           | -1.120 |
| 149054281 | CNTNAP1      | contactin associated protein 1                                | -1.115 |
| 157818393 | BICC1        | BicC family RNA binding protein 1                             | -1.113 |
| 157820417 | LIME1        | Lck interacting transmembrane adaptor 1                       | -1.111 |
| 13929194  | Sult1a1      | sulfotransferase family 1A, phenol-preferring, member 1       | -1.111 |
| 672025117 | MBTD1        | mbt domain containing 1                                       | -1.110 |
| 149068918 | RSF1         | remodeling and spacing factor 1                               | -1.101 |
| 8393886   | SLC22A6      | solute carrier family 22 member 6                             | -1.101 |
| 293362695 | Akap17b      | A kinase (PRKA) anchor protein 17B                            | -1.099 |
| 564389875 | ARHGEF10     | Rho guanine nucleotide exchange factor 10                     | -1.098 |
| 149022338 | FKBP7        | FK506 binding protein 7                                       | -1.098 |
| 672015205 | N/A          | N/A                                                           | -1.098 |
| 149055898 | BCAT2        | branched chain amino acid transaminase 2                      | -1.092 |
| 282158051 | MYH11        | myosin heavy chain 11                                         | -1.084 |
| 564303933 | TET3         | tet methylcytosine dioxygenase 3                              | -1.084 |
| 295391840 | LOC100361645 | LRRGT00075-like                                               | -1.080 |
| 149059246 | N/A          | N/A                                                           | -1.078 |
| 672062394 | N/A          | N/A                                                           | -1.077 |
| 197386131 | Acad10       | acyl-CoA dehydrogenase family, member 10                      | -1.076 |
| 157821459 | OLFML3       | olfactomedin like 3                                           | -1.072 |
| 564303928 | TET3         | tet methylcytosine dioxygenase 3                              | -1.072 |
| 149016012 | KANSL1L      | KAT8 regulatory NSL complex subunit 1 like                    | -1.070 |
| 166157468 | CLMN         | calmin                                                        | -1.068 |
| 13540697  | NOV          | nephroblastoma overexpressed                                  | -1.066 |
| 157819343 | FNDC7        | fibronectin type III domain containing 7                      | -1.064 |
| 189011703 | KDEL3        | KDEL endoplasmic reticulum protein retention receptor 3       | -1.064 |
| 149057336 | ZSCAN2       | zinc finger and SCAN domain containing 2                      | -1.063 |
| 672052120 | RBM12B       | RNA binding motif protein 12B                                 | -1.062 |
| 672081701 | N/A          | N/A                                                           | -1.061 |
| 672023109 | COL12A1      | collagen type XII alpha 1 chain                               | -1.060 |
| 672020846 | N/A          | N/A                                                           | -1.060 |
| 300796557 | PIH1D2       | PIH1 domain containing 2                                      | -1.059 |
| 197386139 | SSC5D        | scavenger receptor cysteine rich family member with 5 domains | -1.058 |
| 674082951 | N/A          | N/A                                                           | -1.054 |
| 57528269  | ABHD14A      | abhydrolase domain containing 14A                             | -1.051 |

|           |                          |                                                   |        |
|-----------|--------------------------|---------------------------------------------------|--------|
| 63706033  | Gm5174 (includes others) | serine/threonine kinase, pseudogene 1             | -1.051 |
| 8392864   | ADORA2B                  | adenosine A2b receptor                            | -1.050 |
| 568972854 | N/A                      | N/A                                               | -1.050 |
| 197927252 | SHQ1                     | SHQ1, H/ACA ribonucleoprotein assembly factor     | -1.049 |
| 281332117 | TGFBI                    | transforming growth factor beta induced           | -1.048 |
| 564345556 | CROT                     | carnitine O-octanoyltransferase                   | -1.045 |
| 311771704 | C15orf65                 | chromosome 15 open reading frame 65               | -1.044 |
| 149016584 | ZNF606                   | zinc finger protein 606                           | -1.044 |
| 672056365 | KIAA0586                 | KIAA0586                                          | -1.041 |
| 672019578 | MYSM1                    | Myb like, SWIRM and MPN domains 1                 | -1.040 |
| 672063750 | N/A                      | N/A                                               | -1.039 |
| 564296997 | ZNF45                    | zinc finger protein 45                            | -1.038 |
| 672027054 | N/A                      | N/A                                               | -1.037 |
| 401461786 | CP                       | ceruloplasmin                                     | -1.035 |
| 564309732 | IGSF9B                   | immunoglobulin superfamily member 9B              | -1.035 |
| 158508544 | DDR2                     | discoidin domain receptor tyrosine kinase 2       | -1.033 |
| 148665664 | PHLDB2                   | pleckstrin homology like domain family B member 2 | -1.030 |
| 564308822 | SLC45A4                  | solute carrier family 45 member 4                 | -1.029 |
| 157819321 | GSDMA                    | gasdermin A                                       | -1.025 |
| 392351290 | DNAH9                    | dynein axonemal heavy chain 9                     | -1.024 |
| 569009290 | TENM1                    | teneurin transmembrane protein 1                  | -1.024 |
| 7549765   | HK2                      | hexokinase 2                                      | -1.021 |
| 149059823 | N/A                      | N/A                                               | -1.021 |
| 113206040 | LRRC34                   | leucine rich repeat containing 34                 | -1.020 |
| 56090485  | M6PR                     | mannose-6-phosphate receptor, cation dependent    | -1.019 |
| 564322493 | RPGR                     | retinitis pigmentosa GTPase regulator             | -1.018 |
| 29789038  | BMP6                     | bone morphogenetic protein 6                      | -1.017 |
| 564339943 | PHYHD1                   | phytanoyl-CoA dioxygenase domain containing 1     | -1.017 |
| 564300507 | SH3D19                   | SH3 domain containing 19                          | -1.017 |
| 157824136 | Zic3                     | Zic family member 3                               | -1.017 |
| 62078617  | PPP1R36                  | protein phosphatase 1 regulatory subunit 36       | -1.016 |
| 157817334 | Tmem198b                 | transmembrane protein 198b                        | -1.016 |
| 149048116 | KIAA0907                 | KIAA0907                                          | -1.013 |
| 113951677 | LPAR6                    | lysophosphatidic acid receptor 6                  | -1.012 |
| 880855761 | N/A                      | N/A                                               | -1.010 |

|           |         |                                                                  |        |
|-----------|---------|------------------------------------------------------------------|--------|
| 672055261 | N/A     | N/A                                                              | -1.010 |
| 109471717 | SAMD9   | sterile alpha motif domain containing 9                          | -1.008 |
| 655832893 | N/A     | N/A                                                              | -1.005 |
| 26380608  | KCNE5   | potassium voltage-gated channel subfamily E regulatory subunit 5 | -0.998 |
| 28461161  | LDLR    | low density lipoprotein receptor                                 | -0.995 |
| 62339302  | Pcdhb8  | protocadherin beta 8                                             | -0.992 |
| 9845234   | ANXA2   | annexin A2                                                       | -0.989 |
| 149038394 | N/A     | N/A                                                              | -0.989 |
| 46358064  | AURKA   | aurora kinase A                                                  | -0.987 |
| 149044576 | N/A     | N/A                                                              | -0.984 |
| 568977750 | DOCK4   | dedicator of cytokinesis 4                                       | -0.983 |
| 564393142 | WDR36   | WD repeat domain 36                                              | -0.983 |
| 916043983 | Baiap3  | BAI1-associated protein 3                                        | -0.982 |
| 58865948  | CREB3L2 | cAMP responsive element binding protein 3 like 2                 | -0.980 |
| 164448680 | HBB     | hemoglobin subunit beta                                          | -0.978 |
| 768711606 | THBS3   | thrombospondin 3                                                 | -0.977 |
| 55742709  | ELN     | elastin                                                          | -0.976 |
| 672024549 | SLX4    | SLX4 structure-specific endonuclease subunit                     | -0.975 |
| 78486570  | ARHGAP4 | Rho GTPase activating protein 4                                  | -0.973 |
| 74180977  | MYH9    | myosin heavy chain 9                                             | -0.972 |
| 18959222  | SCN9A   | sodium voltage-gated channel alpha subunit 9                     | -0.968 |
| 281427229 | COL6A2  | collagen type VI alpha 2 chain                                   | -0.965 |
| 672059136 | N/A     | N/A                                                              | -0.964 |
| 149053793 | TSPOAP1 | TSPO associated protein 1                                        | -0.963 |
| 300798165 | ZBTB40  | zinc finger and BTB domain containing 40                         | -0.963 |
| 685536628 | N/A     | N/A                                                              | -0.963 |
| 311771720 | DGKQ    | diacylglycerol kinase theta                                      | -0.962 |
| 157822349 | SLC52A2 | solute carrier family 52 member 2                                | -0.960 |
| 672063748 | N/A     | N/A                                                              | -0.959 |
| 33286888  | GJA1    | gap junction protein alpha 1                                     | -0.955 |
| 187469467 | SMPD5   | sphingomyelin phosphodiesterase 5                                | -0.955 |
| 300795183 | SNTG1   | syntrophin gamma 1                                               | -0.955 |
| 795568671 | N/A     | N/A                                                              | -0.953 |
| 48675865  | PDP2    | pyruvate dehydrogenase phosphatase catalytic subunit 2           | -0.952 |
| 564342055 | Apip    | APAF1 interacting protein                                        | -0.951 |
| 149056134 | Dzf17   | zinc finger protein 17                                           | -0.951 |
| 114145565 | GALNS   | galactosamine (N-acetyl)-6-sulfatase                             | -0.951 |

|           |                                |                                                                          |        |
|-----------|--------------------------------|--------------------------------------------------------------------------|--------|
| 672082323 | N/A                            | N/A                                                                      | -0.950 |
| 300794555 | TMC7                           | transmembrane channel like 7                                             | -0.949 |
| 312836829 | ADAMTS12                       | ADAM metallopeptidase with thrombospondin type 1 motif 12                | -0.947 |
| 55742713  | ECM1                           | extracellular matrix protein 1                                           | -0.946 |
| 19424190  | CX3CR1                         | C-X3-C motif chemokine receptor 1                                        | -0.945 |
| 6981306   | TNFRSF11B                      | TNF receptor superfamily member 11b                                      | -0.944 |
| 62078689  | CYYR1                          | cysteine and tyrosine rich 1                                             | -0.943 |
| 157817670 | SLC2A10                        | solute carrier family 2 member 10                                        | -0.943 |
| 672062667 | N/A                            | N/A                                                                      | -0.942 |
| 60360628  | ATP8A1                         | ATPase phospholipid transporting 8A1                                     | -0.941 |
| 149047034 | N/A                            | N/A                                                                      | -0.941 |
| 672012920 | N/A                            | N/A                                                                      | -0.941 |
| 19424254  | ANGPTL2                        | angiopoietin like 2                                                      | -0.937 |
| 564297371 | LOC102556967                   | zinc finger protein 484-like                                             | -0.937 |
| 672064415 | LOC103693202                   | uncharacterized LOC103693202                                             | -0.936 |
| 564380038 | FBRSL1                         | fibrosin like 1                                                          | -0.935 |
| 672051145 | PARP11                         | poly(ADP-ribose) polymerase family member 11                             | -0.935 |
| 9506953   | PCOLCE                         | procollagen C-endopeptidase enhancer                                     | -0.935 |
| 42476287  | TGM2                           | transglutaminase 2                                                       | -0.935 |
| 672080024 | N/A                            | N/A                                                                      | -0.935 |
| 67078530  | CHAF1B                         | chromatin assembly factor 1 subunit B                                    | -0.934 |
| 157821893 | SDF2L1                         | stromal cell derived factor 2 like 1                                     | -0.934 |
| 157820317 | STXBP4                         | syntaxin binding protein 4                                               | -0.932 |
| 157822365 | LAMC3                          | laminin subunit gamma 3                                                  | -0.930 |
| 564367862 | Dst                            | dystonin                                                                 | -0.928 |
| 672063869 | MGC116197 (includes others)    | similar to RIKEN cDNA 1700001E04                                         | -0.928 |
| 68163507  | LOC100912029 (includes others) | similar to DNA segment, Chr 19, Brigham & Womens Genetics 1357 expressed | -0.927 |
| 931568101 | N/A                            | N/A                                                                      | -0.926 |
| 8392983   | BGN                            | biglycan                                                                 | -0.924 |
| 13928758  | CTSK                           | cathepsin K                                                              | -0.923 |
| 13591971  | HNMT                           | histamine N-methyltransferase                                            | -0.922 |
| 564310195 | ANKDD1A                        | ankyrin repeat and death domain containing 1A                            | -0.919 |
| 31324556  | RDH10                          | retinol dehydrogenase 10                                                 | -0.919 |
| 672051730 | N/A                            | N/A                                                                      | -0.919 |
| 685536628 | N/A                            | N/A                                                                      | -0.918 |

|           |                 |                                                                                |        |
|-----------|-----------------|--------------------------------------------------------------------------------|--------|
| 564369844 | NEWGENE_1308624 | sialidase 4                                                                    | -0.916 |
| 164519095 | SLC9A2          | solute carrier family 9 member A2                                              | -0.914 |
| 13929156  | MYBPH           | myosin binding protein H                                                       | -0.913 |
| 344250492 | N/A             | N/A                                                                            | -0.913 |
| 564318923 | WDR17           | WD repeat domain 17                                                            | -0.909 |
| 449279816 | N/A             | N/A                                                                            | -0.906 |
| 13592057  | RPL18           | ribosomal protein L18                                                          | -0.905 |
| 256773236 | DNAH1           | dynein axonemal heavy chain 1                                                  | -0.904 |
| 149061916 | NUDT8           | nudix hydrolase 8                                                              | -0.904 |
| 149031942 | N/A             | N/A                                                                            | -0.904 |
| 157786850 | TUBD1           | tubulin delta 1                                                                | -0.903 |
| 564311681 | PIKFYVE         | phosphoinositide kinase, FYVE-type zinc finger containing                      | -0.901 |
| 672087260 | N/A             | N/A                                                                            | -0.899 |
| 198442871 | KANK1           | KN motif and ankyrin repeat domains 1                                          | -0.897 |
| 392355027 | TANGO6          | transport and golgi organization 6 homolog                                     | -0.894 |
| 149034450 | N/A             | N/A                                                                            | -0.892 |
| 38454234  | COL27A1         | collagen type XXVII alpha 1 chain                                              | -0.891 |
| 672060362 | ELFN2           | extracellular leucine rich repeat and fibronectin type III domain containing 2 | -0.890 |
| 57114344  | UHRF1           | ubiquitin like with PHD and ring finger domains 1                              | -0.886 |
| 880876474 | N/A             | N/A                                                                            | -0.885 |
| 586908220 | ARHGAP44        | Rho GTPase activating protein 44                                               | -0.884 |
| 305682588 | PDZD7           | PDZ domain containing 7                                                        | -0.882 |
| 402744047 | SLC25A18        | solute carrier family 25 member 18                                             | -0.881 |
| 8393469   | S1PR2           | sphingosine-1-phosphate receptor 2                                             | -0.880 |
| 672031392 | N/A             | N/A                                                                            | -0.879 |
| 392340959 | ITSN2           | intersectin 2                                                                  | -0.878 |
| 62078663  | Mmgt2           | membrane magnesium transporter 2                                               | -0.878 |
| 149068766 | PLEKHB1         | pleckstrin homology domain containing B1                                       | -0.877 |
| 149031998 | ACVRL1          | activin A receptor like type 1                                                 | -0.876 |
| 13591914  | ANPEP           | alanyl aminopeptidase, membrane                                                | -0.875 |
| 13162359  | CYBA            | cytochrome b-245 alpha chain                                                   | -0.874 |
| 672087474 | REPS2           | RALBP1 associated Eps domain containing 2                                      | -0.873 |
| 672087474 | REPS2           | RALBP1 associated Eps domain containing 2                                      | -0.873 |
| 564364327 | CA12            | carbonic anhydrase 12                                                          | -0.869 |
| 157823627 | MFSD12          | major facilitator superfamily domain containing 12                             | -0.868 |

|           |          |                                                                          |        |
|-----------|----------|--------------------------------------------------------------------------|--------|
| 6754808   | NDP      | NDP, norrin cystine knot growth factor                                   | -0.867 |
| 672087260 | N/A      | N/A                                                                      | -0.867 |
| 478732983 | MAP3K5   | mitogen-activated protein kinase kinase kinase 5                         | -0.865 |
| 13786192  | APLNR    | apelin receptor                                                          | -0.864 |
| 672086986 | SLC38A5  | solute carrier family 38 member 5                                        | -0.864 |
| 564350006 | PREX2    | phosphatidylinositol-3,4,5-trisphosphate dependent Rac exchange factor 2 | -0.862 |
| 149065838 | N/A      | N/A                                                                      | -0.862 |
| 148747412 | CBWD1    | COBW domain containing 1                                                 | -0.861 |
| 76159291  | CAST     | calpastatin                                                              | -0.860 |
| 149034989 | RADIL    | Rap associating with DIL domain                                          | -0.859 |
| 672012705 | SYNE1    | spectrin repeat containing nuclear envelope protein 1                    | -0.859 |
| 293353154 | TBC1D1   | TBC1 domain family member 1                                              | -0.859 |
| 672069572 | KANSL1   | KAT8 regulatory NSL complex subunit 1                                    | -0.858 |
| 157820241 | Marvel1  | MARVEL domain containing 1                                               | -0.858 |
| 564312944 | KIAA0753 | KIAA0753                                                                 | -0.857 |
| 408407614 | DNA2     | DNA replication helicase/nuclease 2                                      | -0.853 |
| 672064676 | N/A      | N/A                                                                      | -0.853 |
| 568940286 | BRAF     | B-Raf proto-oncogene, serine/threonine kinase                            | -0.852 |
| 6978703   | CPT1B    | carnitine palmitoyltransferase 1B                                        | -0.851 |
| 406719604 | SLC9A9   | solute carrier family 9 member A9                                        | -0.851 |
| 392338379 | SLC26A8  | solute carrier family 26 member 8                                        | -0.848 |
| 75832132  | ESYT1    | extended synaptotagmin 1                                                 | -0.844 |
| 564380929 | KCNT2    | potassium sodium-activated channel subfamily T member 2                  | -0.844 |
| 755566692 | HUWE1    | HECT, UBA and WWE domain containing 1, E3 ubiquitin protein ligase       | -0.837 |
| 564378315 | Zfp853   | zinc finger protein 853                                                  | -0.837 |
| 6754928   | OSR1     | odd-skipped related transcription factor 1                               | -0.835 |
| 20302097  | PIGL     | phosphatidylinositol glycan anchor biosynthesis class L                  | -0.835 |
| 149034207 | ITIH3    | inter-alpha-trypsin inhibitor heavy chain 3                              | -0.834 |
| 11177892  | KCNT1    | potassium sodium-activated channel subfamily T member 1                  | -0.833 |
| 25742772  | KCNA2    | potassium voltage-gated channel subfamily A member 2                     | -0.832 |
| 564387543 | UGGT2    | UDP-glucose glycoprotein glucosyltransferase 2                           | -0.831 |
| 157820681 | DLL4     | delta like canonical Notch ligand 4                                      | -0.826 |



|           |                    |                                                                     |        |
|-----------|--------------------|---------------------------------------------------------------------|--------|
| 157818909 | Zim1               | zinc finger, imprinted 1                                            | -0.825 |
| 157821487 | ANKRD34B           | ankyrin repeat domain 34B                                           | -0.824 |
| 149053566 | N/A                | N/A                                                                 | -0.824 |
| 157822353 | Hells/LOC100911660 | helicase, lymphoid specific                                         | -0.823 |
| 564320335 | TMEM241            | transmembrane protein 241                                           | -0.823 |
| 815891318 | ENTPD1             | ectonucleoside triphosphate diphosphohydrolase 1                    | -0.822 |
| 183986528 | ZNF692             | zinc finger protein 692                                             | -0.822 |
| 148695091 | BBS5               | Bardet-Biedl syndrome 5                                             | -0.821 |
| 109509239 | RRP1B              | ribosomal RNA processing 1B                                         | -0.820 |
| 672073969 | CLASP1             | cytoplasmic linker associated protein 1                             | -0.817 |
| 187282311 | ISLR               | immunoglobulin superfamily containing leucine rich repeat           | -0.817 |
| 77861917  | CFH                | complement factor H                                                 | -0.816 |
| 226698394 | UNC80              | unc-80 homolog, NALCN activator                                     | -0.814 |
| 149020543 | C19orf66           | chromosome 19 open reading frame 66                                 | -0.813 |
| 1346731   | HAPLN1             | hyaluronan and proteoglycan link protein 1                          | -0.813 |
| 672062052 | ITGA11             | integrin subunit alpha 11                                           | -0.813 |
| 124244050 | PPIP5K1            | diphosphoinositol pentakisphosphate kinase 1                        | -0.813 |
| 27436863  | HACL1              | 2-hydroxyacyl-CoA lyase 1                                           | -0.812 |
| 157818989 | LRRC71             | leucine rich repeat containing 71                                   | -0.811 |
| 564394961 | N/A                | N/A                                                                 | -0.811 |
| 6978545   | ATP1A2             | ATPase Na <sup>+</sup> /K <sup>+</sup> transporting subunit alpha 2 | -0.810 |
| 292781228 | DECR1              | 2,4-dienoyl-CoA reductase 1                                         | -0.810 |
| 149038682 | Srgn               | serglycin                                                           | -0.810 |
| 672080026 | N/A                | N/A                                                                 | -0.810 |
| 209870105 | GPR37L1            | G protein-coupled receptor 37 like 1                                | -0.807 |
| 672070295 | BAHCC1             | BAH domain and coiled-coil containing 1                             | -0.800 |
| 148679862 | SLC35F3            | solute carrier family 35 member F3                                  | -0.800 |
| 157818137 | RECK               | reversion inducing cysteine rich protein with kazal motifs          | -0.798 |
| 672023790 | N/A                | N/A                                                                 | -0.798 |
| 78486556  | C16orf58           | chromosome 16 open reading frame 58                                 | -0.797 |
| 16758800  | TRIP10             | thyroid hormone receptor interactor 10                              | -0.797 |
| 149051152 | N/A                | N/A                                                                 | -0.797 |
| 589932011 | N/A                | N/A                                                                 | -0.796 |
| 62078751  | GRAMD2B            | GRAM domain containing 2B                                           | -0.795 |
| 672013014 | N/A                | N/A                                                                 | -0.795 |
| 166197716 | PER3               | period circadian clock 3                                            | -0.794 |

|           |          |                                                                    |        |
|-----------|----------|--------------------------------------------------------------------|--------|
| 51571903  | C6orf47  | chromosome 6 open reading frame 47                                 | -0.793 |
| 564319108 | ADGRA2   | adhesion G protein-coupled receptor A2                             | -0.791 |
| 157821089 | PEX10    | peroxisomal biogenesis factor 10                                   | -0.791 |
| 198041781 | GLTPD2   | glycolipid transfer protein domain containing 2                    | -0.790 |
| 564333959 | STN1     | STN1, CST complex subunit                                          | -0.790 |
| 755566682 | HUWE1    | HECT, UBA and WWE domain containing 1, E3 ubiquitin protein ligase | -0.788 |
| 564307839 | JAG2     | jagged 2                                                           | -0.788 |
| 57528326  | MTFMT    | mitochondrial methionyl-tRNA formyltransferase                     | -0.787 |
| 564299019 | KIAA2026 | KIAA2026                                                           | -0.786 |
| 293341811 | PRR14L   | proline rich 14 like                                               | -0.786 |
| 6978587   | CALCRL   | calcitonin receptor like receptor                                  | -0.785 |
| 157822879 | EFS      | embryonal Fyn-associated substrate                                 | -0.785 |
| 300794353 | FANCL    | Fanconi anemia complementation group L                             | -0.784 |
| 62078681  | OGFOD3   | 2-oxoglutarate and iron dependent oxygenase domain containing 3    | -0.784 |
| 164518939 | SLC7A11  | solute carrier family 7 member 11                                  | -0.783 |
| 167830444 | DCDC2    | doublecortin domain containing 2                                   | -0.781 |
| 67514566  | POLA2    | DNA polymerase alpha 2, accessory subunit                          | -0.780 |
| 307078146 | UACA     | uveal autoantigen with coiled-coil domains and ankyrin repeats     | -0.780 |
| 164565435 | SYNJ2    | synaptojanin 2                                                     | -0.778 |
| 312922352 | TTF2     | transcription termination factor 2                                 | -0.774 |
| 564296650 | ZSCAN18  | zinc finger and SCAN domain containing 18                          | -0.774 |
| 201023375 | ZFAT     | zinc finger and AT-hook domain containing                          | -0.771 |
| 55741551  | CHCHD10  | coiled-coil-helix-coiled-coil-helix domain containing 10           | -0.770 |
| 188595660 | SNX33    | sorting nexin 33                                                   | -0.769 |
| 157823511 | TBX18    | T-box 18                                                           | -0.769 |
| 672034684 | N/A      | N/A                                                                | -0.769 |
| 149068170 | N/A      | N/A                                                                | -0.768 |
| 402745263 | COL11A1  | collagen type XI alpha 1 chain                                     | -0.766 |
| 31324552  | NADSYN1  | NAD synthetase 1                                                   | -0.763 |
| 8393218   | CTSC     | cathepsin C                                                        | -0.761 |
| 19173756  | ERG      | ERG, ETS transcription factor                                      | -0.761 |
| 256000825 | FAM227A  | family with sequence similarity 227 member A                       | -0.761 |
| 672041704 | NIPBL    | NIPBL, cohesin loading factor                                      | -0.760 |
| 672041704 | NIPBL    | NIPBL, cohesin loading factor                                      | -0.760 |

|           |                             |                                                           |        |
|-----------|-----------------------------|-----------------------------------------------------------|--------|
| 157821969 | ARAP2                       | ArfGAP with RhoGAP domain, ankyrin repeat and PH domain 2 | -0.757 |
| 25742733  | P2RY1                       | purinergic receptor P2Y1                                  | -0.757 |
| 201861690 | TPK1                        | thiamin pyrophosphokinase 1                               | -0.756 |
| 564333748 | N/A                         | N/A                                                       | -0.756 |
| 731457978 | N/A                         | N/A                                                       | -0.755 |
| 300794574 | AHNAK                       | AHNAK nucleoprotein                                       | -0.754 |
| 108935976 | DISC1                       | disrupted in schizophrenia 1                              | -0.754 |
| 589937133 | N/A                         | N/A                                                       | -0.754 |
| 62945368  | ITGBL1                      | integrin subunit beta like 1                              | -0.752 |
| 149044145 | N/A                         | N/A                                                       | -0.752 |
| 157822217 | ZFYVE28                     | zinc finger FYVE-type containing 28                       | -0.751 |
| 470631944 | N/A                         | N/A                                                       | -0.751 |
| 149053435 | N/A                         | N/A                                                       | -0.751 |
| 293344558 | PCNX3                       | pecanex homolog 3 (Drosophila)                            | -0.748 |
| 672079407 | CCDC66                      | coiled-coil domain containing 66                          | -0.747 |
| 149029225 | N/A                         | N/A                                                       | -0.747 |
| 157818843 | EXTL1                       | exostosin like glycosyltransferase 1                      | -0.746 |
| 18777774  | KCNH7                       | potassium voltage-gated channel subfamily H member 7      | -0.746 |
| 22129763  | LOC257642                   | rRNA promoter binding protein                             | -0.743 |
| 148692627 | N/A                         | N/A                                                       | -0.743 |
| 149061352 | ADAM12                      | ADAM metallopeptidase domain 12                           | -0.742 |
| 7949020   | CDK2                        | cyclin dependent kinase 2                                 | -0.742 |
| 635092008 | N/A                         | N/A                                                       | -0.742 |
| 564317714 | Ktn1                        | kinectin 1                                                | -0.740 |
| 564349878 | KIAA1551                    | KIAA1551                                                  | -0.738 |
| 77993356  | CDCA7L                      | cell division cycle associated 7 like                     | -0.737 |
| 18249941  | CHRM1                       | cholinergic receptor muscarinic 1                         | -0.735 |
| 325530254 | FAM109A                     | family with sequence similarity 109 member A              | -0.734 |
| 197333870 | NID2                        | nidogen 2                                                 | -0.733 |
| 564324344 | LOC363306 (includes others) | hypothetical protein LOC363306                            | -0.731 |
| 293343546 | C5orf49                     | chromosome 5 open reading frame 49                        | -0.730 |
| 13591983  | LUM                         | lumican                                                   | -0.730 |
| 157787103 | RASA2                       | RAS p21 protein activator 2                               | -0.730 |
| 564400410 | AMOT                        | angiomotin                                                | -0.729 |
| 564310412 | DOPEY1                      | dopey family member 1                                     | -0.729 |
| 672034690 | N/A                         | N/A                                                       | -0.729 |
| 50657355  | TOP1MT                      | topoisomerase (DNA) I, mitochondrial                      | -0.728 |

|           |            |                                                                             |        |
|-----------|------------|-----------------------------------------------------------------------------|--------|
| 589269168 | WDR34      | WD repeat domain 34                                                         | -0.728 |
| 73746573  | TGFB1I1    | transforming growth factor beta 1 induced transcript 1                      | -0.724 |
| 157821021 | ZC3H6      | zinc finger CCCH-type containing 6                                          | -0.724 |
| 672046728 | N/A        | N/A                                                                         | -0.723 |
| 40254754  | OCLN       | occludin                                                                    | -0.720 |
| 564327948 | JOSD2      | Josephin domain containing 2                                                | -0.719 |
| 149028840 | N/A        | N/A                                                                         | -0.719 |
| 672063785 | N/A        | N/A                                                                         | -0.719 |
| 564388153 | N/A        | N/A                                                                         | -0.719 |
| 564329859 | COA4       | cytochrome c oxidase assembly factor 4 homolog                              | -0.718 |
| 293344916 | COL6A1     | collagen type VI alpha 1 chain                                              | -0.718 |
| 672022615 | N/A        | N/A                                                                         | -0.716 |
| 564352121 | LRP8       | LDL receptor related protein 8                                              | -0.715 |
| 8393057   | SERPINH1   | serpin family H member 1                                                    | -0.714 |
| 392355060 | VAT1L      | vesicle amine transport 1 like                                              | -0.714 |
| 149054246 | KCNH4      | potassium voltage-gated channel subfamily H member 4                        | -0.712 |
| 209954806 | PIGN       | phosphatidylinositol glycan anchor biosynthesis class N                     | -0.712 |
| 564301698 | LY75       | lymphocyte antigen 75                                                       | -0.711 |
| 68163509  | THNSL1     | threonine synthase like 1                                                   | -0.711 |
| 171846640 | FBLN1      | fibulin 1                                                                   | -0.709 |
| 157786618 | RANGRF     | RAN guanine nucleotide release factor                                       | -0.707 |
| 589917689 | N/A        | N/A                                                                         | -0.705 |
| 46310239  | SIDT1      | SID1 transmembrane family member 1                                          | -0.704 |
| 672026767 | N/A        | N/A                                                                         | -0.703 |
| 13786160  | SLC22A8    | solute carrier family 22 member 8                                           | -0.700 |
| 148699893 | COL6A1     | collagen type VI alpha 1 chain                                              | -0.699 |
| 112350    | N/A        | N/A                                                                         | -0.699 |
| 576067885 | AGBL3      | ATP/GTP binding protein like 3                                              | -0.698 |
| 62078635  | CCDC153    | coiled-coil domain containing 153                                           | -0.698 |
| 157817903 | Dcaf12l1   | DDB1 and CUL4 associated factor 12-like 1                                   | -0.698 |
| 564395631 | Slc25a36l1 | solute carrier family 25 (pyrimidine nucleotide carrier ), member 36-like 1 | -0.698 |
| 77917594  | ZFYVE19    | zinc finger FYVE-type containing 19                                         | -0.698 |
| 392332443 | PRKDC      | protein kinase, DNA-activated, catalytic polypeptide                        | -0.697 |
| 53850640  | MAVS       | mitochondrial antiviral signaling protein                                   | -0.696 |

|           |          |                                                                      |        |
|-----------|----------|----------------------------------------------------------------------|--------|
| 46402488  | NOS3     | nitric oxide synthase 3                                              | -0.696 |
| 149043511 | N/A      | N/A                                                                  | -0.696 |
| 568917022 | DZANK1   | double zinc ribbon and ankyrin repeat domains 1                      | -0.695 |
| 74184716  | Kat6b    | K(lysine) acetyltransferase 6B                                       | -0.694 |
| 157823373 | TRHDE    | thyrotropin releasing hormone degrading enzyme                       | -0.694 |
| 201066348 | PEAR1    | platelet endothelial aggregation receptor 1                          | -0.693 |
| 149048177 | RRNAD1   | ribosomal RNA adenine dimethylase domain containing 1                | -0.693 |
| 674048263 | N/A      | N/A                                                                  | -0.693 |
| 199562000 | USP40    | ubiquitin specific peptidase 40                                      | -0.692 |
| 189303595 | RNPC3    | RNA binding region (RNP1, RRM) containing 3                          | -0.690 |
| 407228394 | ZNF397   | zinc finger protein 397                                              | -0.690 |
| 564306228 | N/A      | N/A                                                                  | -0.690 |
| 307548437 | NYAP2    | neuronal tyrosine-phosphorylated phosphoinositide-3-kinase adaptor 2 | -0.689 |
| 149039207 | COL5A1   | collagen type V alpha 1 chain                                        | -0.687 |
| 76257398  | Cdkn1c   | cyclin-dependent kinase inhibitor 1C (P57)                           | -0.686 |
| 293342292 | FAM208A  | family with sequence similarity 208 member A                         | -0.686 |
| 672085293 | FANCA    | Fanconi anemia complementation group A                               | -0.686 |
| 157822819 | PNP      | purine nucleoside phosphorylase                                      | -0.686 |
| 672055092 | N/A      | N/A                                                                  | -0.686 |
| 16758622  | IFT172   | intraflagellar transport 172                                         | -0.684 |
| 238859561 | DCTD     | dCMP deaminase                                                       | -0.683 |
| 149038013 | SLC9A5   | solute carrier family 9 member A5                                    | -0.681 |
| 657940868 | PALLD    | palladin, cytoskeletal associated protein                            | -0.680 |
| 12831205  | EPAS1    | endothelial PAS domain protein 1                                     | -0.679 |
| 308044487 | KIAA0319 | KIAA0319                                                             | -0.679 |
| 293347888 | SRBD1    | S1 RNA binding domain 1                                              | -0.679 |
| 564305934 | BTBD19   | BTB domain containing 19                                             | -0.678 |
| 6978505   | ANXA5    | annexin A5                                                           | -0.677 |
| 157821335 | GPR162   | G protein-coupled receptor 162                                       | -0.677 |
| 568975606 | SLC16A13 | solute carrier family 16 member 13                                   | -0.677 |
| 19705485  | SULF1    | sulfatase 1                                                          | -0.677 |
| 564314522 | LRCH3    | leucine rich repeats and calponin homology domain containing 3       | -0.676 |
| 294979146 | TCTN1    | tectonic family member 1                                             | -0.676 |
| 148698795 | GPX7     | glutathione peroxidase 7                                             | -0.675 |

|           |         |                                                                                                |        |
|-----------|---------|------------------------------------------------------------------------------------------------|--------|
| 83642834  | NAGK    | N-acetylglucosamine kinase                                                                     | -0.675 |
| 672079010 | N/A     | N/A                                                                                            | -0.675 |
| 148699227 | MYADM   | myeloid associated differentiation marker                                                      | -0.672 |
| 149053435 | N/A     | N/A                                                                                            | -0.670 |
| 71043696  | DUSP11  | dual specificity phosphatase 11                                                                | -0.668 |
| 9507107   | SLC12A4 | solute carrier family 12 member 4                                                              | -0.668 |
| 300388140 | MYLK    | myosin light chain kinase                                                                      | -0.667 |
| 815891112 | AHR     | aryl hydrocarbon receptor                                                                      | -0.666 |
| 172045714 | MIIP    | migration and invasion inhibitory protein                                                      | -0.666 |
| 392340768 | DISP3   | dispatched RND transporter family member 3                                                     | -0.664 |
| 148690852 | FCGRT   | Fc fragment of IgG receptor and transporter                                                    | -0.664 |
| 157817600 | SMARCA1 | SWI/SNF related, matrix associated, actin dependent regulator of chromatin, subfamily a like 1 | -0.664 |
| 672057459 | DGKA    | diacylglycerol kinase alpha                                                                    | -0.663 |
| 398650618 | MMP11   | matrix metalloproteinase 11                                                                    | -0.663 |
| 149034958 | ZNF12   | zinc finger protein 12                                                                         | -0.663 |
| 564305252 | FBXO10  | F-box protein 10                                                                               | -0.662 |
| 697012013 | N/A     | N/A                                                                                            | -0.662 |
| 403310668 | FOXC1   | forkhead box C1                                                                                | -0.661 |
| 569000267 | MDC1    | mediator of DNA damage checkpoint 1                                                            | -0.661 |
| 149034401 | TLE2    | transducin like enhancer of split 2                                                            | -0.661 |
| 149053793 | TSPOAP1 | TSPO associated protein 1                                                                      | -0.661 |
| 672027054 | N/A     | N/A                                                                                            | -0.661 |
| 149054665 | ABCA9   | ATP binding cassette subfamily A member 9                                                      | -0.660 |
| 164607119 | SUMF2   | sulfatase modifying factor 2                                                                   | -0.659 |
| 23463307  | RIOX2   | ribosomal oxygenase 2                                                                          | -0.658 |
| 672023055 | TLN2    | talin 2                                                                                        | -0.658 |
| 564296997 | ZNF45   | zinc finger protein 45                                                                         | -0.658 |
| 404247433 | SVIL    | supervillin                                                                                    | -0.654 |
| 392340509 | PTPRD   | protein tyrosine phosphatase, receptor type D                                                  | -0.652 |
| 392346344 | N/A     | N/A                                                                                            | -0.652 |
| 57164109  | KRCC1   | lysine rich coiled-coil 1                                                                      | -0.650 |
| 281599331 | ZKSCAN8 | zinc finger with KRAB and SCAN domains 8                                                       | -0.650 |
| 242397450 | PCSK6   | proprotein convertase subtilisin/kexin type 6                                                  | -0.649 |
| 6978737   | CYP1B1  | cytochrome P450 family 1 subfamily B member 1                                                  | -0.648 |
| 392334509 | N/A     | N/A                                                                                            | -0.648 |
| 149731778 | N/A     | N/A                                                                                            | -0.648 |
| 6681095   | CYCS    | cytochrome c, somatic                                                                          | -0.647 |

|           |              |                                                              |        |
|-----------|--------------|--------------------------------------------------------------|--------|
| 157819753 | RCN1         | reticulocalbin 1                                             | -0.647 |
| 148680122 | UNC5C        | unc-5 netrin receptor C                                      | -0.647 |
| 58219539  | ENG          | endoglin                                                     | -0.646 |
| 25282463  | CDC20        | cell division cycle 20                                       | -0.645 |
| 68341969  | CDKL1        | cyclin dependent kinase like 1                               | -0.645 |
| 157823279 | CGNL1        | cingulin like 1                                              | -0.645 |
| 564357839 | PAN2         | PAN2 poly(A) specific ribonuclease subunit                   | -0.644 |
| 81158091  | PCDHGA9      | protocadherin gamma subfamily A, 9                           | -0.639 |
| 16923978  | SLC26A2      | solute carrier family 26 member 2                            | -0.639 |
| 564330609 | SYT17        | synaptotagmin 17                                             | -0.639 |
| 672066075 | COL6A3       | collagen type VI alpha 3 chain                               | -0.638 |
| 392341425 | PTPRB        | protein tyrosine phosphatase, receptor type B                | -0.637 |
| 57528264  | MCCC1        | methylcrotonoyl-CoA carboxylase 1                            | -0.636 |
| 568954992 | PALLD        | palladin, cytoskeletal associated protein                    | -0.636 |
| 655886694 | N/A          | N/A                                                          | -0.635 |
| 75905809  | AKAP12       | A-kinase anchoring protein 12                                | -0.634 |
| 31077144  | CAND2        | cullin associated and neddylation dissociated 2 (putative)   | -0.634 |
| 8394446   | TGFBR3       | transforming growth factor beta receptor 3                   | -0.634 |
| 672023055 | TLN2         | talin 2                                                      | -0.634 |
| 13929062  | GGCX         | gamma-glutamyl carboxylase                                   | -0.632 |
| 74218228  | HNRNPC       | heterogeneous nuclear ribonucleoprotein C (C1/C2)            | -0.631 |
| 400153797 | PLOD1        | procollagen-lysine,2-oxoglutarate 5-dioxygenase 1            | -0.631 |
| 568930638 | HSPG2        | heparan sulfate proteoglycan 2                               | -0.630 |
| 21728394  | KLHL17       | kelch like family member 17                                  | -0.630 |
| 7106349   | LYNX1        | Ly6/neurotoxin 1                                             | -0.629 |
| 18959236  | PECR         | peroxisomal trans-2-enoyl-CoA reductase                      | -0.629 |
| 880939564 | N/A          | N/A                                                          | -0.629 |
| 149057830 | Hgsnat       | heparan-alpha-glucosaminide N-acetyltransferase              | -0.628 |
| 148667878 | IGFBP5       | insulin like growth factor binding protein 5                 | -0.628 |
| 672073977 | LOC103690089 | pleckstrin homology domain-containing family A member 6-like | -0.628 |
| 61557127  | NNT          | nicotinamide nucleotide transhydrogenase                     | -0.627 |
| 564311685 | PIKFYVE      | phosphoinositide kinase, FYVE-type zinc finger containing    | -0.627 |
| 149064065 | ZMYM5        | zinc finger MYM-type containing 5                            | -0.627 |
| 158081747 | PDGFB        | platelet derived growth factor subunit B                     | -0.626 |

|           |                             |                                                                |        |
|-----------|-----------------------------|----------------------------------------------------------------|--------|
| 149036738 | Slc41a3                     | solute carrier family 41, member 3                             | -0.626 |
| 672047353 | RALGAPA2                    | Ral GTPase activating protein catalytic alpha subunit 2        | -0.625 |
| 157819207 | BCL6                        | B-cell CLL/lymphoma 6                                          | -0.623 |
| 197927123 | LYRM7                       | LYR motif containing 7                                         | -0.622 |
| 16758928  | RGCC                        | regulator of cell cycle                                        | -0.622 |
| 58865848  | PLSCR3                      | phospholipid scramblase 3                                      | -0.619 |
| 564323252 | KLHL13                      | kelch like family member 13                                    | -0.618 |
| 148698920 | N/A                         | N/A                                                            | -0.618 |
| 77695926  | STAT1                       | signal transducer and activator of transcription 1             | -0.617 |
| 157786694 | CAVIN1                      | caveolae associated protein 1                                  | -0.616 |
| 157787030 | DISP1                       | dispatched RND transporter family member 1                     | -0.616 |
| 11024664  | LTBP1                       | latent transforming growth factor beta binding protein 1       | -0.616 |
| 392340179 | RERG                        | RAS like estrogen regulated growth inhibitor                   | -0.616 |
| 61097937  | VEGFB                       | vascular endothelial growth factor B                           | -0.616 |
| 564369812 | D2HGDH                      | D-2-hydroxyglutarate dehydrogenase                             | -0.615 |
| 68534736  | ERAP1                       | endoplasmic reticulum aminopeptidase 1                         | -0.615 |
| 157786690 | PRKCA                       | protein kinase C alpha                                         | -0.614 |
| 6981128   | KDR                         | kinase insert domain receptor                                  | -0.613 |
| 564391229 | SERPINB6                    | serpin family B member 6                                       | -0.613 |
| 537179361 | N/A                         | N/A                                                            | -0.613 |
| 672047351 | RALGAPA2                    | Ral GTPase activating protein catalytic alpha subunit 2        | -0.611 |
| 312147379 | LAMA1                       | laminin subunit alpha 1                                        | -0.610 |
| 56119147  | ARRDC3                      | arrestin domain containing 3                                   | -0.609 |
| 115392004 | GPR17                       | G protein-coupled receptor 17                                  | -0.609 |
| 672063869 | MGC116197 (includes others) | similar to RIKEN cDNA 1700001E04                               | -0.609 |
| 149054795 | RGD1309310                  | similar to mKIAA0195 protein                                   | -0.609 |
| 157816939 | WASHC3                      | WASH complex subunit 3                                         | -0.609 |
| 194474072 | RRM2B                       | ribonucleotide reductase regulatory TP53 inducible subunit M2B | -0.607 |
| 568956384 | ADAMTS18                    | ADAM metalloproteinase with thrombospondin type 1 motif 18     | -0.604 |
| 253683447 | ETV1                        | ETS variant 1                                                  | -0.604 |
| 83025052  | ANKS6                       | ankyrin repeat and sterile alpha motif domain containing 6     | -0.603 |
| 402478640 | HTRA3                       | HtrA serine peptidase 3                                        | -0.603 |



|           |            |                                                            |        |
|-----------|------------|------------------------------------------------------------|--------|
| 27720599  | PLEKHO2    | pleckstrin homology domain containing O2                   | -0.603 |
| 58865984  | TRAF3IP1   | TRAF3 interacting protein 1                                | -0.603 |
| 672069567 | N/A        | N/A                                                        | -0.603 |
| 25453410  | CACNA1B    | calcium voltage-gated channel subunit alpha1 B             | -0.602 |
| 672014912 | SORBS1     | sorbin and SH3 domain containing 1                         | -0.602 |
| 293348472 | ZFR2       | zinc finger RNA binding protein 2                          | -0.602 |
| 293348472 | ZFR2       | zinc finger RNA binding protein 2                          | -0.602 |
| 564301426 | CNTRL      | centriolin                                                 | -0.601 |
| 198278450 | CPT1C      | carnitine palmitoyltransferase 1C                          | -0.601 |
| 157824134 | DENND6B    | DENN domain containing 6B                                  | -0.601 |
| 672053977 | KCNQ4      | potassium voltage-gated channel subfamily Q member 4       | -0.601 |
| 815891336 | TCN2       | transcobalamin 2                                           | -0.601 |
| 672054770 | LOC500584  | similar to casein kinase 1, gamma 3 isoform 2              | -0.600 |
| 672034032 | N/A        | N/A                                                        | -0.600 |
| 189163483 | PCK2       | phosphoenolpyruvate carboxykinase 2, mitochondrial         | -0.599 |
| 392339261 | PKP4       | plakophilin 4                                              | -0.599 |
| 50510463  | PRUNE2     | prune homolog 2                                            | -0.599 |
| 594075460 | N/A        | N/A                                                        | -0.599 |
| 293356488 | RIC1       | RIC1 homolog, RAB6A GEF complex partner 1                  | -0.598 |
| 294610780 | SYNE2      | spectrin repeat containing nuclear envelope protein 2      | -0.598 |
| 18959240  | ADARB2     | adenosine deaminase, RNA specific B2 (inactive)            | -0.597 |
| 56090457  | ARMCX6     | armadillo repeat containing, X-linked 6                    | -0.597 |
| 672041794 | RGD1310081 | similar to hypothetical protein FLJ13231                   | -0.597 |
| 148747194 | SLC16A7    | solute carrier family 16 member 7                          | -0.597 |
| 537229522 | N/A        | N/A                                                        | -0.597 |
| 426352465 | N/A        | N/A                                                        | -0.597 |
| 157821557 | CD248      | CD248 molecule                                             | -0.595 |
| 12018250  | TEP1       | telomerase associated protein 1                            | -0.594 |
| 121583772 | BBX        | BBX, HMG-box containing                                    | -0.593 |
| 399220341 | SLC2A13    | solute carrier family 2 member 13                          | -0.593 |
| 16758186  | SLCO1C1    | solute carrier organic anion transporter family member 1C1 | -0.593 |
| 148697042 | N/A        | N/A                                                        | -0.593 |
| 149025910 | NEUROG2    | neurogenin 2                                               | -0.592 |
| 300797349 | EBF4       | early B-cell factor 4                                      | -0.590 |

|           |                    |                                                               |        |
|-----------|--------------------|---------------------------------------------------------------|--------|
| 149046383 | Lman2l             | lectin, mannose-binding 2-like                                | -0.589 |
| 13562118  | LRP2               | LDL receptor related protein 2                                | -0.589 |
| 564355112 | EMILIN1            | elastin microfibril interfacier 1                             | -0.588 |
| 13928736  | AMPD3              | adenosine monophosphate deaminase 3                           | -0.587 |
| 148692356 | ARHGEF1            | Rho guanine nucleotide exchange factor 1                      | -0.587 |
| 564297850 | CRTC3              | CREB regulated transcription coactivator 3                    | -0.587 |
| 564367529 | ENPP4              | ectonucleotide pyrophosphatase/phosphodiesterase 4 (putative) | -0.587 |
| 157786874 | Fmnl1              | formin-like 1                                                 | -0.587 |
| 966948818 | N/A                | N/A                                                           | -0.587 |
| 672044191 | TBCK               | TBC1 domain containing kinase                                 | -0.585 |
| 109490297 | ABCA3              | ATP binding cassette subfamily A member 3                     | -0.584 |
| 3157995   | DAB2               | DAB2, clathrin adaptor protein                                | -0.584 |
| 11067409  | NEGR1              | neuronal growth regulator 1                                   | -0.584 |
| 18426846  | DCBLD2             | discoidin, CUB and LCCL domain containing 2                   | -0.583 |
| 157817498 | GLDC               | glycine decarboxylase                                         | -0.583 |
| 348041395 | DLGAP2             | DLG associated protein 2                                      | -0.582 |
| 149028753 | N/A                | N/A                                                           | -0.582 |
| 157824146 | ITGA5              | integrin subunit alpha 5                                      | -0.581 |
| 7542357   | QKI                | QKI, KH domain containing RNA binding                         | -0.581 |
| 157822461 | C20orf194          | chromosome 20 open reading frame 194                          | -0.579 |
| 404247454 | COL26A1            | collagen type XXVI alpha 1 chain                              | -0.579 |
| 132566529 | DIO2               | iodothyronine deiodinase 2                                    | -0.579 |
| 672073723 | GLI2               | GLI family zinc finger 2                                      | -0.578 |
| 6981142   | LAMB2              | laminin subunit beta 2                                        | -0.578 |
| 124487354 | TAF4               | TATA-box binding protein associated factor 4                  | -0.578 |
| 76443683  | LOC100912042/Surf2 | surfeit 2                                                     | -0.577 |
| 50510855  | RIMKLB             | ribosomal modification protein rimK like family member B      | -0.576 |
| 157818491 | DUS2               | dihydrouridine synthase 2                                     | -0.575 |
| 78042613  | NICN1              | nicolin 1                                                     | -0.575 |
| 124286858 | B230217C12Rik      | RIKEN cDNA B230217C12 gene                                    | -0.573 |
| 148669431 | DNAJC27            | DnaJ heat shock protein family (Hsp40) member C27             | -0.573 |
| 300797038 | HHIP               | hedgehog interacting protein                                  | -0.573 |
| 157821393 | LRRC20             | leucine rich repeat containing 20                             | -0.573 |
| 625292335 | N/A                | N/A                                                           | -0.572 |

|           |         |                                                       |        |
|-----------|---------|-------------------------------------------------------|--------|
| 672064584 | DAAM2   | dishevelled associated activator of morphogenesis 2   | -0.571 |
| 77993368  | ACSF2   | acyl-CoA synthetase family member 2                   | -0.570 |
| 564302153 | BAHD1   | bromo adjacent homology domain containing 1           | -0.569 |
| 68341971  | MINDY1  | MINDY lysine 48 deubiquitinase 1                      | -0.569 |
| 564361876 | RAPGEF3 | Rap guanine nucleotide exchange factor 3              | -0.569 |
| 384368019 | Snhg11  | small nucleolar RNA host gene 11                      | -0.569 |
| 939319594 | CPNE7   | copine 7                                              | -0.568 |
| 532008265 | N/A     | N/A                                                   | -0.568 |
| 61557118  | PCGF6   | polycomb group ring finger 6                          | -0.567 |
| 589965307 | N/A     | N/A                                                   | -0.567 |
| 529367218 | Abca8a  | ATP-binding cassette, sub-family A (ABC1), member 8a  | -0.566 |
| 68163523  | TTC26   | tetratricopeptide repeat domain 26                    | -0.566 |
| 50054384  | CSF1    | colony stimulating factor 1                           | -0.565 |
| 149059979 | KLHL13  | kelch like family member 13                           | -0.565 |
| 537137169 | N/A     | N/A                                                   | -0.565 |
| 149046941 | BEND3   | BEN domain containing 3                               | -0.564 |
| 564382262 | Ptpn14  | protein tyrosine phosphatase, non-receptor type 14    | -0.564 |
| 672017461 | Rrbp1   | ribosome binding protein 1                            | -0.564 |
| 635141277 | N/A     | N/A                                                   | -0.563 |
| 127140886 | EML6    | echinoderm microtubule associated protein like 6      | -0.562 |
| 71043706  | MUS81   | MUS81 structure-specific endonuclease subunit         | -0.562 |
| 157819569 | TEAD2   | TEA domain transcription factor 2                     | -0.562 |
| 815891312 | CACNA1G | calcium voltage-gated channel subunit alpha 1 G       | -0.561 |
| 564342470 | MGA     | MGA, MAX dimerization protein                         | -0.560 |
| 16758138  | POMT1   | protein O-mannosyltransferase 1                       | -0.560 |
| 157823283 | Coch    | cochlin                                               | -0.559 |
| 564352420 | MKNK1   | MAP kinase interacting serine/threonine kinase 1      | -0.558 |
| 564310904 | N/A     | N/A                                                   | -0.558 |
| 568916013 | N/A     | N/A                                                   | -0.557 |
| 358030320 | DMTN    | dematin actin binding protein                         | -0.556 |
| 672014089 | N/A     | N/A                                                   | -0.556 |
| 6981008   | HAS2    | hyaluronan synthase 2                                 | -0.555 |
| 149038513 | SYNE1   | spectrin repeat containing nuclear envelope protein 1 | -0.555 |
| 219282643 | Zfp61   | zinc finger protein 61                                | -0.555 |

|           |                  |                                                                                |        |
|-----------|------------------|--------------------------------------------------------------------------------|--------|
| 374253863 | CPNE2            | copine 2                                                                       | -0.554 |
| 672014740 | MAMDC2           | MAM domain containing 2                                                        | -0.554 |
| 9507045   | RGS5             | regulator of G protein signaling 5                                             | -0.554 |
| 954470796 | N/A              | N/A                                                                            | -0.554 |
| 55741859  | XRCC4            | X-ray repair cross complementing 4                                             | -0.552 |
| 594191048 | C19orf54         | chromosome 19 open reading frame 54                                            | -0.551 |
| 293349337 | COL12A1          | collagen type XII alpha 1 chain                                                | -0.551 |
| 16758716  | CACNB2           | calcium voltage-gated channel auxiliary subunit beta 2                         | -0.550 |
| 818015    | HBB              | hemoglobin subunit beta                                                        | -0.550 |
| 149049048 | RECQL            | RecQ like helicase                                                             | -0.550 |
| 167900441 | FOKK1            | forkhead box K1                                                                | -0.549 |
| 149065851 | XPNPEP3          | X-prolyl aminopeptidase 3                                                      | -0.549 |
| 149060466 | ZBTB20           | zinc finger and BTB domain containing 20                                       | -0.549 |
| 71043616  | CDCA7            | cell division cycle associated 7                                               | -0.548 |
| 148690851 | RCN3             | reticulocalbin 3                                                               | -0.548 |
| 568950242 | Pgap2            | post-GPI attachment to proteins 2                                              | -0.547 |
| 10242377  | GRIK4            | glutamate ionotropic receptor kainate type subunit 4                           | -0.546 |
| 157822743 | KIF20A           | kinesin family member 20A                                                      | -0.545 |
| 9437326   | SLC4A4           | solute carrier family 4 member 4                                               | -0.544 |
| 157786876 | ELFN1            | extracellular leucine rich repeat and fibronectin type III domain containing 1 | -0.543 |
| 148686921 | SLC24A4          | solute carrier family 24 member 4                                              | -0.543 |
| 755783452 | N/A              | N/A                                                                            | -0.543 |
| 344250708 | N/A              | N/A                                                                            | -0.543 |
| 672058561 | N/A              | N/A                                                                            | -0.542 |
| 45478182  | N/A              | N/A                                                                            | -0.542 |
| 564329392 | FLNA             | filamin A                                                                      | -0.541 |
| 109488672 | SLFN5            | schlafen family member 5                                                       | -0.541 |
| 18104933  | FMOD             | fibromodulin                                                                   | -0.540 |
| 564360472 | OPLAH            | 5-oxoprolinase (ATP-hydrolysing)                                               | -0.540 |
| 45478072  | N/A              | N/A                                                                            | -0.540 |
| 564318054 | R3hcc1           | R3H domain and coiled-coil containing 1                                        | -0.539 |
| 62078469  | RSPH10B/RSPH10B2 | radial spoke head 10 homolog B                                                 | -0.539 |
| 219278723 | ZNF23            | zinc finger protein 23                                                         | -0.539 |
| 817307535 | N/A              | N/A                                                                            | -0.539 |
| 625254629 | N/A              | N/A                                                                            | -0.538 |
| 281604225 | PUS7             | pseudouridylate synthase 7 (putative)                                          | -0.537 |

|           |            |                                                                            |        |
|-----------|------------|----------------------------------------------------------------------------|--------|
| 6978867   | GABRB1     | gamma-aminobutyric acid type A receptor beta1 subunit                      | -0.536 |
| 149041357 | RGD1311744 | similar to RIKEN cDNA 5830475I06                                           | -0.536 |
| 33414515  | PXK        | PX domain containing serine/threonine kinase like                          | -0.535 |
| 33086478  | N/A        | N/A                                                                        | -0.535 |
| 300797651 | FOXO1      | forkhead box O1                                                            | -0.534 |
| 16758486  | PHYH       | phytanoyl-CoA 2-hydroxylase                                                | -0.534 |
| 39930495  | PTCH1      | patched 1                                                                  | -0.534 |
| 157819687 | TUBGCP5    | tubulin gamma complex associated protein 5                                 | -0.534 |
| 29293811  | SERPINF1   | serpin family F member 1                                                   | -0.533 |
| 392331829 | ATAD5      | ATPase family, AAA domain containing 5                                     | -0.531 |
| 672028474 | CDH24      | cadherin 24                                                                | -0.531 |
| 110347559 | PCDHA13    | protocadherin alpha 13                                                     | -0.531 |
| 6981664   | TNFRSF1A   | TNF receptor superfamily member 1A                                         | -0.530 |
| 210032529 | IQGAP1     | IQ motif containing GTPase activating protein 1                            | -0.529 |
| 13591981  | LSS        | lanosterol synthase                                                        | -0.529 |
| 149028178 | RANBP3     | RAN binding protein 3                                                      | -0.529 |
| 157817704 | TRIM36     | tripartite motif containing 36                                             | -0.529 |
| 109475601 | GPATCH3    | G-patch domain containing 3                                                | -0.528 |
| 157824208 | NTNG1      | netrin G1                                                                  | -0.528 |
| 300797330 | PTPRU      | protein tyrosine phosphatase, receptor type U                              | -0.528 |
| 281604221 | POLA1      | DNA polymerase alpha 1, catalytic subunit                                  | -0.527 |
| 149024348 | RAP1GAP    | RAP1 GTPase activating protein                                             | -0.527 |
| 109484871 | HERC1      | HECT and RLD domain containing E3 ubiquitin protein ligase family member 1 | -0.526 |
| 568972691 | STAT5B     | signal transducer and activator of transcription 5B                        | -0.526 |
| 564302924 | TSHZ2      | teashirt zinc finger homeobox 2                                            | -0.526 |
| 312922377 | POLE       | DNA polymerase epsilon, catalytic subunit                                  | -0.525 |
| 755520134 | N/A        | N/A                                                                        | -0.525 |
| 13994179  | SLC24A2    | solute carrier family 24 member 2                                          | -0.524 |
| 392341019 | TOGARAM1   | TOG array regulator of axonemal microtubules 1                             | -0.524 |
| 50511215  | TTC14      | tetratricopeptide repeat domain 14                                         | -0.524 |
| 383087738 | TYK2       | tyrosine kinase 2                                                          | -0.524 |
| 564323057 | ARMCX4     | armadillo repeat containing, X-linked 4                                    | -0.523 |
| 589954679 | N/A        | N/A                                                                        | -0.523 |
| 46485403  | CHST7      | carbohydrate sulfotransferase 7                                            | -0.522 |

|           |              |                                                                    |        |
|-----------|--------------|--------------------------------------------------------------------|--------|
| 157823399 | COG4         | component of oligomeric golgi complex 4                            | -0.522 |
| 124107592 | MYO1C        | myosin IC                                                          | -0.522 |
| 78187981  | TRPV2        | transient receptor potential cation channel subfamily V member 2   | -0.522 |
| 62079077  | ALG14        | ALG14, UDP-N-acetylglucosaminyltransferase subunit                 | -0.521 |
| 405778354 | NKD1         | naked cuticle homolog 1                                            | -0.521 |
| 672057084 | N/A          | N/A                                                                | -0.521 |
| 157820275 | OCEL1        | occludin/ELL domain containing 1                                   | -0.520 |
| 392338478 | TTC37        | tetratricopeptide repeat domain 37                                 | -0.520 |
| 219804406 | DOCK1        | dedicator of cytokinesis 1                                         | -0.519 |
| 28972652  | SLC12A5      | solute carrier family 12 member 5                                  | -0.519 |
| 2773162   | ABCC8        | ATP binding cassette subfamily C member 8                          | -0.515 |
| 197313711 | PALD1        | phosphatase domain containing, paladin 1                           | -0.515 |
| 149016805 | PSD3         | pleckstrin and Sec7 domain containing 3                            | -0.515 |
| 109460492 | Arfgef3      | ARFGEF family member 3                                             | -0.514 |
| 984104888 | N/A          | N/A                                                                | -0.514 |
| 672043357 | ARNT         | aryl hydrocarbon receptor nuclear translocator                     | -0.513 |
| 148702301 | CYB561       | cytochrome b561                                                    | -0.513 |
| 18959266  | KHDRBS2      | KH RNA binding domain containing, signal transduction associated 2 | -0.513 |
| 564371892 | N/A          | N/A                                                                | -0.513 |
| 148697713 | CACNG2       | calcium voltage-gated channel auxiliary subunit gamma 2            | -0.512 |
| 71361669  | CIT          | citron rho-interacting serine/threonine kinase                     | -0.512 |
| 58865750  | ZC3H8        | zinc finger CCCH-type containing 8                                 | -0.512 |
| 149057193 | N/A          | N/A                                                                | -0.512 |
| 71043764  | C20orf27     | chromosome 20 open reading frame 27                                | -0.510 |
| 157822913 | LHFPL2       | lipoma HMGIC fusion partner-like 2                                 | -0.510 |
| 157818983 | SIRT7        | sirtuin 7                                                          | -0.509 |
| 13929166  | CLIC4        | chloride intracellular channel 4                                   | -0.508 |
| 148698628 | HECTD3       | HECT domain E3 ubiquitin protein ligase 3                          | -0.508 |
| 157817743 | CDH5         | cadherin 5                                                         | -0.507 |
| 149049654 | CXCL12       | C-X-C motif chemokine ligand 12                                    | -0.507 |
| 149032830 | CCDC127      | coiled-coil domain containing 127                                  | -0.505 |
| 55741540  | KATNAL1      | katanin catalytic subunit A1 like 1                                | -0.505 |
| 564317005 | TBC1D1       | TBC1 domain family member 1                                        | -0.505 |
| 149061998 | N/A          | N/A                                                                | -0.505 |
| 564300485 | LOC102551095 | uncharacterized LOC102551095                                       | -0.504 |
| 149067993 | RBBP6        | RB binding protein 6, ubiquitin ligase                             | -0.503 |

|           |            |                                                         |        |
|-----------|------------|---------------------------------------------------------|--------|
| 149022245 | SCRN3      | secernin 3                                              | -0.503 |
| 564365342 | N/A        | N/A                                                     | -0.503 |
| 149025408 | N/A        | N/A                                                     | -0.503 |
| 392343941 | ZC3H4      | zinc finger CCCH-type containing 4                      | -0.502 |
| 58865380  | STAT2      | signal transducer and activator of transcription 2      | -0.501 |
| 675781130 | N/A        | N/A                                                     | -0.501 |
| 672035060 | CIC        | capicua transcriptional repressor                       | -0.499 |
| 564304076 | FGD5       | FYVE, RhoGEF and PH domain containing 5                 | -0.499 |
| 281332137 | KIF11      | kinesin family member 11                                | -0.499 |
| 293352381 | PAN3       | PAN3 poly(A) specific ribonuclease subunit              | -0.499 |
| 564339225 | N/A        | N/A                                                     | -0.499 |
| 672026392 | PNPLA6     | patatin like phospholipase domain containing 6          | -0.497 |
| 149029577 | N/A        | N/A                                                     | -0.497 |
| 564367481 | TMEM63B    | transmembrane protein 63B                               | -0.496 |
| 78214350  | COQ9       | coenzyme Q9                                             | -0.495 |
| 392350322 | DNAJC13    | DnaJ heat shock protein family (Hsp40) member C13       | -0.495 |
| 672016550 | RAPGEF1    | Rap guanine nucleotide exchange factor 1                | -0.495 |
| 403420604 | PCDH11X    | protocadherin 11 X-linked                               | -0.494 |
| 913508404 | N/A        | N/A                                                     | -0.494 |
| 13027400  | GUCY1A2    | guanylate cyclase 1 soluble subunit alpha 2             | -0.493 |
| 149052198 | NPRL3      | NPR3 like, GATOR1 complex subunit                       | -0.493 |
| 148689279 | RBM5       | RNA binding motif protein 5                             | -0.493 |
| 149025849 | ARHGAP29   | Rho GTPase activating protein 29                        | -0.492 |
| 210033118 | COG1       | component of oligomeric golgi complex 1                 | -0.492 |
| 13591989  | MLH1       | mutL homolog 1                                          | -0.492 |
| 157817205 | USP45      | ubiquitin specific peptidase 45                         | -0.492 |
| 219275534 | VPS13A     | vacuolar protein sorting 13 homolog A                   | -0.492 |
| 210032083 | ATG4D      | autophagy related 4D cysteine peptidase                 | -0.491 |
| 6978761   | DGKG       | diacylglycerol kinase gamma                             | -0.491 |
| 392338392 | PCNT       | pericentrin                                             | -0.491 |
| 6978789   | SPARCL1    | SPARC like 1                                            | -0.491 |
| 820994385 | N/A        | N/A                                                     | -0.491 |
| 157819911 | CSGALNACT2 | chondroitin sulfate N-acetylgalactosaminyltransferase 2 | -0.490 |
| 13592007  | MVK        | mevalonate kinase                                       | -0.490 |
| 392338478 | TTC37      | tetratricopeptide repeat domain 37                      | -0.490 |
| 281371499 | COL5A2     | collagen type V alpha 2 chain                           | -0.489 |
| 210032365 | HSP90B1    | heat shock protein 90 beta family member 1              | -0.489 |

|           |            |                                                                        |        |
|-----------|------------|------------------------------------------------------------------------|--------|
| 310772205 | MAP7       | microtubule associated protein 7                                       | -0.488 |
| 67078430  | METTL3     | methyltransferase like 3                                               | -0.488 |
| 564372831 | N/A        | N/A                                                                    | -0.488 |
| 694870853 | AP5Z1      | adaptor related protein complex 5 zeta 1 subunit                       | -0.487 |
| 564323143 | Gprasp2    | G protein-coupled receptor associated sorting protein 2                | -0.487 |
| 149016965 | GRB10      | growth factor receptor bound protein 10                                | -0.487 |
| 148699520 | SLC39A3    | solute carrier family 39 member 3                                      | -0.487 |
| 300669604 | ADAM15     | ADAM metallopeptidase domain 15                                        | -0.486 |
| 148679892 | WLS        | wntless Wnt ligand secretion mediator                                  | -0.486 |
| 748983393 | ZBTB4      | zinc finger and BTB domain containing 4                                | -0.486 |
| 149046900 | N/A        | N/A                                                                    | -0.485 |
| 310688881 | NEK1       | NIMA related kinase 1                                                  | -0.484 |
| 27545388  | ABCA5      | ATP binding cassette subfamily A member 5                              | -0.483 |
| 202070751 | RFTN1      | raftlin, lipid raft linker 1                                           | -0.483 |
| 86129590  | TES        | testin LIM domain protein                                              | -0.483 |
| 672015261 | N/A        | N/A                                                                    | -0.483 |
| 149040074 | FAM107A    | family with sequence similarity 107 member A                           | -0.482 |
| 74181920  | FADS3      | fatty acid desaturase 3                                                | -0.481 |
| 672036991 | N/A        | N/A                                                                    | -0.481 |
| 149041576 | REXO2      | RNA exonuclease 2                                                      | -0.480 |
| 564335541 | RGD1310081 | similar to hypothetical protein FLJ13231                               | -0.480 |
| 56119120  | SNF8       | SNF8, ESCRT-II complex subunit                                         | -0.480 |
| 197927244 | TIE1       | tyrosine kinase with immunoglobulin like and EGF like domains 1        | -0.480 |
| 24980968  | ABRA1      | ABRA C-terminal like                                                   | -0.479 |
| 564323057 | ARMCX4     | armadillo repeat containing, X-linked 4                                | -0.479 |
| 188536057 | LRP5       | LDL receptor related protein 5                                         | -0.478 |
| 41056215  | XRCC5      | X-ray repair cross complementing 5                                     | -0.478 |
| 215272398 | HIP1       | huntingtin interacting protein 1                                       | -0.477 |
| 13786142  | SLIT3      | slit guidance ligand 3                                                 | -0.477 |
| 568970276 | SH3PXD2B   | SH3 and PX domains 2B                                                  | -0.476 |
| 568970276 | SH3PXD2B   | SH3 and PX domains 2B                                                  | -0.476 |
| 51948488  | SIRT5      | sirtuin 5                                                              | -0.476 |
| 149020634 | TAF1D      | TATA-box binding protein associated factor, RNA polymerase I subunit D | -0.475 |
| 67972654  | TIMP3      | TIMP metallopeptidase inhibitor 3                                      | -0.475 |
| 158508684 | BCAS1      | breast carcinoma amplified sequence 1                                  | -0.474 |
| 295148052 | DCAF17     | DDB1 and CUL4 associated factor 17                                     | -0.474 |



|           |          |                                                          |        |
|-----------|----------|----------------------------------------------------------|--------|
| 56605714  | NDUFAF7  | NADH:ubiquinone oxidoreductase complex assembly factor 7 | -0.474 |
| 149054589 | PECAM1   | platelet and endothelial cell adhesion molecule 1        | -0.474 |
| 157787147 | TEK      | TEK receptor tyrosine kinase                             | -0.474 |
| 157819565 | WBP1     | WW domain binding protein 1                              | -0.474 |
| 564368910 | FN1      | fibronectin 1                                            | -0.473 |
| 149032573 | KIAA1462 | KIAA1462                                                 | -0.473 |
| 189011606 | NCEH1    | neutral cholesterol ester hydrolase 1                    | -0.473 |
| 672032219 | REPS2    | RALBP1 associated Eps domain containing 2                | -0.473 |
| 8394310   | SLC4A2   | solute carrier family 4 member 2                         | -0.472 |
| 157822957 | GPATCH11 | G-patch domain containing 11                             | -0.471 |
| 157822627 | PLXDC2   | plexin domain containing 2                               | -0.470 |
| 149039367 | ABCA2    | ATP binding cassette subfamily A member 2                | -0.469 |
| 77917572  | LIPA     | lipase A, lysosomal acid type                            | -0.468 |
| 149056394 | Sipa1l3  | signal-induced proliferation-associated 1 like 3         | -0.468 |
| 564329612 | ME3      | malic enzyme 3                                           | -0.467 |
| 487524631 | OBSL1    | obscurin like 1                                          | -0.467 |
| 672066518 | N/A      | N/A                                                      | -0.467 |
| 149027639 | Apeg3    | antisense paternally expressed gene 3                    | -0.466 |
| 149024084 | COL16A1  | collagen type XVI alpha 1 chain                          | -0.465 |
| 348605214 | TMEM67   | transmembrane protein 67                                 | -0.465 |
| 635015168 | N/A      | N/A                                                      | -0.465 |
| 71051779  | MRS2     | MRS2, magnesium transporter                              | -0.464 |
| 155369305 | PBXIP1   | PBX homeobox interacting protein 1                       | -0.464 |
| 158534064 | RET      | ret proto-oncogene                                       | -0.464 |
| 296040479 | TXNRD3   | thioredoxin reductase 3                                  | -0.464 |
| 310703673 | GRIN3A   | glutamate ionotropic receptor NMDA type subunit 3A       | -0.463 |
| 8923942   | NOP10    | NOP10 ribonucleoprotein                                  | -0.463 |
| 195976786 | CERS2    | ceramide synthase 2                                      | -0.462 |
| 149058109 | HSD17B7  | hydroxysteroid 17-beta dehydrogenase 7                   | -0.462 |
| 564344961 | RTEL1    | regulator of telomere elongation helicase 1              | -0.462 |
| 149031942 | N/A      | N/A                                                      | -0.462 |
| 77539442  | EPHX1    | epoxide hydrolase 1                                      | -0.461 |
| 560186584 | VEGFA    | vascular endothelial growth factor A                     | -0.461 |
| 966975500 | MMP17    | matrix metalloproteinase 17                              | -0.460 |
| 47058990  | ABCB7    | ATP binding cassette subfamily B member 7                | -0.459 |
| 157818437 | CASKIN2  | CASK interacting protein 2                               | -0.459 |
| 392339730 | COL9A3   | collagen type IX alpha 3 chain                           | -0.459 |

|           |         |                                                                |        |
|-----------|---------|----------------------------------------------------------------|--------|
| 157819457 | MAP3K14 | mitogen-activated protein kinase kinase kinase 14              | -0.459 |
| 880911340 | N/A     | N/A                                                            | -0.458 |
| 51854227  | GSN     | gelsolin                                                       | -0.457 |
| 672015368 | MAST4   | microtubule associated serine/threonine kinase family member 4 | -0.457 |
| 61557206  | ZBTB16  | zinc finger and BTB domain containing 16                       | -0.457 |
| 57527061  | ZGPAT   | zinc finger CCCH-type and G-patch domain containing            | -0.457 |
| 209862829 | SEMA3E  | semaphorin 3E                                                  | -0.456 |
| 149274619 | ZFHX2   | zinc finger homeobox 2                                         | -0.456 |
| 122065191 | ABAT    | 4-aminobutyrate aminotransferase                               | -0.455 |
| 157820039 | FAM214A | family with sequence similarity 214 member A                   | -0.455 |
| 880886217 | N/A     | N/A                                                            | -0.455 |
| 564361507 | CRELD2  | cysteine rich with EGF like domains 2                          | -0.454 |
| 564327030 | DYRK1B  | dual specificity tyrosine phosphorylation regulated kinase 1B  | -0.454 |
| 15011857  | SELENOP | selenoprotein P                                                | -0.454 |
| 507532705 | N/A     | N/A                                                            | -0.454 |
| 40786487  | GPR108  | G protein-coupled receptor 108                                 | -0.453 |
| 672019578 | MYSM1   | Myb like, SWIRM and MPN domains 1                              | -0.453 |
| 140971205 | GRIN2A  | glutamate ionotropic receptor NMDA type subunit 2A             | -0.452 |
| 213512359 | NACC2   | NACC family member 2                                           | -0.452 |
| 53850628  | NDUFS1  | NADH:ubiquinone oxidoreductase core subunit S1                 | -0.452 |
| 392342157 | PHIP    | pleckstrin homology domain interacting protein                 | -0.452 |
| 731253346 | N/A     | N/A                                                            | -0.452 |
| 13591949  | GATM    | glycine amidinotransferase                                     | -0.451 |
| 635039352 | N/A     | N/A                                                            | -0.451 |
| 58865810  | NAGA    | alpha-N-acetylgalactosaminidase                                | -0.450 |
| 205235    | Slc6a7  | solute carrier family 6 member 7                               | -0.450 |
| 672015224 | N/A     | N/A                                                            | -0.450 |
| 157819371 | SYNGR3  | synaptogyrin 3                                                 | -0.448 |
| 817259544 | N/A     | N/A                                                            | -0.448 |
| 157822725 | GNPDA2  | glucosamine-6-phosphate deaminase 2                            | -0.447 |
| 226874871 | OMG     | oligodendrocyte myelin glycoprotein                            | -0.446 |
| 70794768  | HDAC1   | histone deacetylase 1                                          | -0.445 |
| 395759219 | AQP4    | aquaporin 4                                                    | -0.444 |

|           |          |                                                                      |        |
|-----------|----------|----------------------------------------------------------------------|--------|
| 28461153  | PPM1F    | protein phosphatase, Mg <sup>2+</sup> /Mn <sup>2+</sup> dependent 1F | -0.444 |
| 449083357 | VWF      | von Willebrand factor                                                | -0.444 |
| 670979961 | N/A      | N/A                                                                  | -0.444 |
| 281306842 | Med12l   | mediator complex subunit 12-like                                     | -0.443 |
| 13592005  | MVD      | mevalonate diphosphate decarboxylase                                 | -0.443 |
| 148747464 | SCD      | stearoyl-CoA desaturase                                              | -0.443 |
| 16758746  | CNTN4    | contactin 4                                                          | -0.442 |
| 201066395 | MBOAT7   | membrane bound O-acyltransferase domain containing 7                 | -0.442 |
| 564344383 | TOX2     | TOX high mobility group box family member 2                          | -0.441 |
| 58865956  | TSSC1    | tumor suppressing subtransferable candidate 1                        | -0.441 |
| 149065004 | N/A      | N/A                                                                  | -0.441 |
| 148671944 | N/A      | N/A                                                                  | -0.441 |
| 149024818 | MIB2     | mindbomb E3 ubiquitin protein ligase 2                               | -0.440 |
| 564344373 | ZMYND8   | zinc finger MYND-type containing 8                                   | -0.440 |
| 672052684 | N/A      | N/A                                                                  | -0.440 |
| 157819227 | PRPF31   | pre-mRNA processing factor 31                                        | -0.439 |
| 61556936  | CCNL2    | cyclin L2                                                            | -0.438 |
| 157819183 | FAM212B  | family with sequence similarity 212 member B                         | -0.437 |
| 22024392  | KIF1C    | kinesin family member 1C                                             | -0.437 |
| 402794954 | MINK1    | misshapen like kinase 1                                              | -0.437 |
| 281332095 | RB1      | RB transcriptional corepressor 1                                     | -0.437 |
| 928136440 | SRRT     | serrate, RNA effector molecule                                       | -0.437 |
| 171847060 | TTC8     | tetratricopeptide repeat domain 8                                    | -0.437 |
| 602695898 | N/A      | N/A                                                                  | -0.437 |
| 392342046 | ATR      | ATR serine/threonine kinase                                          | -0.436 |
| 456367250 | ASCC3    | activating signal cointegrator 1 complex subunit 3                   | -0.435 |
| 149048674 | PEX5L    | peroxisomal biogenesis factor 5 like                                 | -0.435 |
| 148681112 | TGFB2    | transforming growth factor beta 2                                    | -0.435 |
| 537217423 | N/A      | N/A                                                                  | -0.435 |
| 402766107 | ALDH7A1  | aldehyde dehydrogenase 7 family member A1                            | -0.434 |
| 21245094  | MAN2C1   | mannosidase alpha class 2C member 1                                  | -0.434 |
| 58865436  | FAR1     | fatty acyl-CoA reductase 1                                           | -0.433 |
| 148683194 | INTS3    | integrator complex subunit 3                                         | -0.433 |
| 564296010 | NHSL1    | NHS like 1                                                           | -0.433 |
| 50510321  | ANGPT1   | angiopoietin 1                                                       | -0.432 |
| 157821397 | SLC22A15 | solute carrier family 22 member 15                                   | -0.432 |

|           |          |                                                                            |        |
|-----------|----------|----------------------------------------------------------------------------|--------|
| 149030652 | TARS2    | threonyl-tRNA synthetase 2, mitochondrial (putative)                       | -0.432 |
| 564316234 | CEP170   | centrosomal protein 170                                                    | -0.431 |
| 114145766 | WDR75    | WD repeat domain 75                                                        | -0.431 |
| 149063684 | N/A      | N/A                                                                        | -0.431 |
| 672055862 | N/A      | N/A                                                                        | -0.431 |
| 470611409 | N/A      | N/A                                                                        | -0.430 |
| 392331978 | CDR2L    | cerebellar degeneration related protein 2 like                             | -0.429 |
| 8393861   | HPCAL4   | hippocalcin like 4                                                         | -0.429 |
| 564363988 | ISLR2    | immunoglobulin superfamily containing leucine rich repeat 2                | -0.429 |
| 149058726 | N/A      | N/A                                                                        | -0.429 |
| 149017535 | HDAC10   | histone deacetylase 10                                                     | -0.428 |
| 157786958 | RFX1     | regulatory factor X1                                                       | -0.428 |
| 149023083 | TUBGCP4  | tubulin gamma complex associated protein 4                                 | -0.428 |
| 564317997 | N/A      | N/A                                                                        | -0.428 |
| 309319799 | EIF2AK4  | eukaryotic translation initiation factor 2 alpha kinase 4                  | -0.427 |
| 149060525 | FSTL1    | follistatin like 1                                                         | -0.427 |
| 157822761 | MICAL1   | microtubule associated monooxygenase, calponin and LIM domain containing 1 | -0.427 |
| 403310684 | MON2     | MON2 homolog, regulator of endosome-to-Golgi trafficking                   | -0.427 |
| 2735334   | PDPN     | podoplanin                                                                 | -0.427 |
| 305855087 | UNC5D    | unc-5 netrin receptor D                                                    | -0.427 |
| 148686123 | CEND1    | cell cycle exit and neuronal differentiation 1                             | -0.426 |
| 61557218  | COQ8A    | coenzyme Q8A                                                               | -0.426 |
| 18034793  | GABRG1   | gamma-aminobutyric acid type A receptor gamma1 subunit                     | -0.426 |
| 558611343 | MCM3     | minichromosome maintenance complex component 3                             | -0.426 |
| 157817953 | RPGRIP1L | RPGRIP1 like                                                               | -0.426 |
| 300795140 | TAF1     | TATA-box binding protein associated factor 1                               | -0.426 |
| 160333093 | TPRG1L   | tumor protein p63 regulated 1 like                                         | -0.426 |
| 306482651 | DNAJB14  | DnaJ heat shock protein family (Hsp40) member B14                          | -0.425 |
| 157818329 | PROSER1  | proline and serine rich 1                                                  | -0.425 |
| 564340177 | SETX     | senataxin                                                                  | -0.425 |
| 672020901 | N/A      | N/A                                                                        | -0.425 |

|           |          |                                                            |        |
|-----------|----------|------------------------------------------------------------|--------|
| 6978595   | CAMK2D   | calcium/calmodulin dependent protein kinase II delta       | -0.424 |
| 77539756  | MED24    | mediator complex subunit 24                                | -0.424 |
| 672055565 | OTOF     | otoferlin                                                  | -0.424 |
| 57528352  | ATP5SL   | ATP5S like                                                 | -0.423 |
| 47155563  | KIF13B   | kinesin family member 13B                                  | -0.423 |
| 8393992   | PMP22    | peripheral myelin protein 22                               | -0.423 |
| 672073522 | N/A      | N/A                                                        | -0.423 |
| 148356229 | CCND1    | cyclin D1                                                  | -0.422 |
| 672062476 | DENND4A  | DENN domain containing 4A                                  | -0.422 |
| 564375919 | USP25    | ubiquitin specific peptidase 25                            | -0.421 |
| 295148092 | ABLIM2   | actin binding LIM protein family member 2                  | -0.420 |
| 672061813 | ACSBG1   | acyl-CoA synthetase bubblegum family member 1              | -0.420 |
| 11067415  | ERBB4    | erb-b2 receptor tyrosine kinase 4                          | -0.420 |
| 46485389  | KIRREL   | kin of IRRE like (Drosophila)                              | -0.420 |
| 50510949  | N/A      | N/A                                                        | -0.420 |
| 29789369  | PTPRG    | protein tyrosine phosphatase, receptor type G              | -0.419 |
| 564388675 | SLC25A42 | solute carrier family 25 member 42                         | -0.419 |
| 672012705 | SYNE1    | spectrin repeat containing nuclear envelope protein 1      | -0.419 |
| 25742617  | EGFR     | epidermal growth factor receptor                           | -0.418 |
| 58865398  | LAP3     | leucine aminopeptidase 3                                   | -0.418 |
| 672051965 | NSMAF    | neutral sphingomyelinase activation associated factor      | -0.418 |
| 157822759 | PARP2    | poly(ADP-ribose) polymerase 2                              | -0.418 |
| 672043401 | POGZ     | pogo transposable element derived with ZNF domain          | -0.418 |
| 6978847   | FMO1     | flavin containing monooxygenase 1                          | -0.417 |
| 148682440 | TMEM14A  | transmembrane protein 14A                                  | -0.417 |
| 157823934 | MZF1     | myeloid zinc finger 1                                      | -0.416 |
| 672029123 | PBRM1    | polybromo 1                                                | -0.416 |
| 16758538  | RASGRF2  | Ras protein specific guanine nucleotide releasing factor 2 | -0.416 |
| 62078847  | TSEN2    | tRNA splicing endonuclease subunit 2                       | -0.416 |
| 568974832 | YBX2     | Y-box binding protein 2                                    | -0.416 |
| 10048483  | PCLO     | piccolo presynaptic cytomatrix protein                     | -0.415 |
| 377823717 | PLEKHA5  | pleckstrin homology domain containing A5                   | -0.415 |
| 564305557 | PTPRD    | protein tyrosine phosphatase, receptor type D              | -0.415 |
| 827835089 | Flt1     | FMS-related tyrosine kinase 1                              | -0.414 |

|           |        |                                                                     |        |
|-----------|--------|---------------------------------------------------------------------|--------|
| 755566690 | HUWE1  | HECT, UBA and WWE domain containing 1, E3 ubiquitin protein ligase  | -0.414 |
| 564375424 | MFSD11 | major facilitator superfamily domain containing 11                  | -0.414 |
| 134948398 | PDS5A  | PDS5 cohesin associated factor A                                    | -0.414 |
| 149045696 | Ccl27a | chemokine (C-C motif) ligand 27A                                    | -0.413 |
| 405113061 | MKI67  | marker of proliferation Ki-67                                       | -0.413 |
| 149042536 | MPV17  | MPV17, mitochondrial inner membrane protein                         | -0.413 |
| 831326005 | N/A    | N/A                                                                 | -0.413 |
| 109480433 | GNPTAB | N-acetylglucosamine-1-phosphate transferase alpha and beta subunits | -0.412 |
| 8393290   | S1PR1  | sphingosine-1-phosphate receptor 1                                  | -0.412 |
| 431910532 | N/A    | N/A                                                                 | -0.412 |
| 54312088  | ATP2B4 | ATPase plasma membrane Ca <sup>2+</sup> transporting 4              | -0.411 |
| 157820325 | CSE1L  | chromosome segregation 1 like                                       | -0.411 |
| 166999225 | GRM1   | glutamate metabotropic receptor 1                                   | -0.411 |
| 51948524  | IGFBP4 | insulin like growth factor binding protein 4                        | -0.411 |
| 157823905 | RDH13  | retinol dehydrogenase 13                                            | -0.411 |
| 148705684 | SLIT2  | slit guidance ligand 2                                              | -0.411 |
| 564363049 | STT3A  | STT3A, catalytic subunit of the oligosaccharyltransferase complex   | -0.411 |
| 402478646 | WDR44  | WD repeat domain 44                                                 | -0.411 |
| 672013431 | N/A    | N/A                                                                 | -0.411 |
| 564400249 | LIMA1  | LIM domain and actin binding 1                                      | -0.410 |
| 300797242 | SPG11  | SPG11, spatacsin vesicle trafficking associated                     | -0.409 |
| 594668377 | N/A    | N/A                                                                 | -0.409 |
| 157817823 | ATG2A  | autophagy related 2A                                                | -0.408 |
| 672038615 | GSG1L  | GSG1 like                                                           | -0.408 |
| 157824160 | VSTM2B | V-set and transmembrane domain containing 2B                        | -0.408 |
| 25282445  | ENTPD2 | ectonucleoside triphosphate diphosphohydrolase 2                    | -0.407 |
| 158635969 | FLAD1  | flavin adenine dinucleotide synthetase 1                            | -0.407 |
| 62079065  | Supt20 | suppressor of Ty 20                                                 | -0.407 |
| 880915307 | N/A    | N/A                                                                 | -0.407 |
| 149066531 | VPS13B | vacuolar protein sorting 13 homolog B                               | -0.406 |
| 13095924  | DRP2   | dystrophin related protein 2                                        | -0.405 |
| 16758712  | PDIA4  | protein disulfide isomerase family A member 4                       | -0.405 |
| 201860270 | NRBP2  | nuclear receptor binding protein 2                                  | -0.404 |

|           |               |                                                            |        |
|-----------|---------------|------------------------------------------------------------|--------|
| 9506901   | MPDZ          | multiple PDZ domain crumbs cell polarity complex component | -0.403 |
| 296439269 | PHF10         | PHD finger protein 10                                      | -0.403 |
| 672083937 | TSHZ1         | teashirt zinc finger homeobox 1                            | -0.403 |
| 162287337 | APOE          | apolipoprotein E                                           | -0.402 |
| 157822133 | VCL           | vinculin                                                   | -0.401 |
| 157824091 | ATF7          | activating transcription factor 7                          | -0.400 |
| 198041989 | PARVB         | parvin beta                                                | -0.400 |
| 12055542  | SLC25A27      | solute carrier family 25 member 27                         | -0.400 |
| 13540699  | NRP2          | neuropilin 2                                               | -0.399 |
| 8393896   | PACSIN1       | protein kinase C and casein kinase substrate in neurons 1  | -0.399 |
| 472380424 | N/A           | N/A                                                        | -0.399 |
| 162287200 | CD82          | CD82 molecule                                              | -0.398 |
| 149063995 | GMPR2         | guanosine monophosphate reductase 2                        | -0.398 |
| 17298688  | HTR2C         | 5-hydroxytryptamine receptor 2C                            | -0.398 |
| 281371412 | LTBP4         | latent transforming growth factor beta binding protein 4   | -0.398 |
| 237757336 | OLIG1         | oligodendrocyte transcription factor 1                     | -0.398 |
| 62655853  | TELO2         | telomere maintenance 2                                     | -0.398 |
| 300796151 | WDR60         | WD repeat domain 60                                        | -0.398 |
| 672057084 | N/A           | N/A                                                        | -0.398 |
| 13162287  | DDT           | D-dopachrome tautomerase                                   | -0.397 |
| 291219919 | STK36         | serine/threonine kinase 36                                 | -0.397 |
| 218505767 | Zfp958        | zinc finger protein 958                                    | -0.397 |
| 77404411  | SFT2D2        | SFT2 domain containing 2                                   | -0.396 |
| 330340430 | WDR19         | WD repeat domain 19                                        | -0.396 |
| 86439949  | ENPP2         | ectonucleotide pyrophosphatase/phosphodiesterase 2         | -0.395 |
| 157817777 | MAP3K3        | mitogen-activated protein kinase kinase kinase 3           | -0.395 |
| 568961602 | VPS13C        | vacuolar protein sorting 13 homolog C                      | -0.395 |
| 884874427 | N/A           | N/A                                                        | -0.395 |
| 74223968  | 5031425E22Rik | RIKEN cDNA 5031425E22 gene                                 | -0.394 |
| 121583776 | LMF2          | lipase maturation factor 2                                 | -0.394 |
| 168823431 | Nrxn3         | neurexin III                                               | -0.394 |
| 568999446 | PTPRM         | protein tyrosine phosphatase, receptor type M              | -0.394 |
| 672063748 | N/A           | N/A                                                        | -0.394 |
| 564343781 | N/A           | N/A                                                        | -0.394 |

|           |          |                                                     |        |
|-----------|----------|-----------------------------------------------------|--------|
| 149060100 | AIFM1    | apoptosis inducing factor mitochondria associated 1 | -0.393 |
| 157823259 | TMEM229A | transmembrane protein 229A                          | -0.393 |
| 296010823 | UBR1     | ubiquitin protein ligase E3 component n-recogin 1   | -0.393 |
| 167860097 | FN3KRP   | fructosamine 3 kinase related protein               | -0.392 |
| 224420    | N/A      | N/A                                                 | -0.392 |
| 564315812 | NAV1     | neuron navigator 1                                  | -0.391 |
| 755494737 | N/A      | N/A                                                 | -0.390 |
| 12711694  | DYNC2H1  | dynein cytoplasmic 2 heavy chain 1                  | -0.389 |
| 300793894 | URB1     | URB1 ribosome biogenesis 1 homolog (S. cerevisiae)  | -0.389 |
| 564375702 | N/A      | N/A                                                 | -0.388 |
| 32452540  | RHOT2    | ras homolog family member T2                        | -0.387 |
| 149039557 | UTRN     | utrophin                                            | -0.387 |
| 672064087 | N/A      | N/A                                                 | -0.387 |
| 23463287  | DCPS     | decapping enzyme, scavenger                         | -0.386 |
| 672087275 | KDM5C    | lysine demethylase 5C                               | -0.386 |
| 672049251 | ZNF800   | zinc finger protein 800                             | -0.386 |
| 672083376 | N/A      | N/A                                                 | -0.386 |
| 564393980 | ME2      | malic enzyme 2                                      | -0.385 |
| 149060362 | ALCAM    | activated leukocyte cell adhesion molecule          | -0.384 |
| 201066342 | MAN2B2   | mannosidase alpha class 2B member 2                 | -0.384 |
| 12621108  | NR1I3    | nuclear receptor subfamily 1 group I member 3       | -0.384 |
| 148690402 | SLC9A3R2 | SLC9A3 regulator 2                                  | -0.384 |
| 672024549 | SLX4     | SLX4 structure-specific endonuclease subunit        | -0.384 |
| 60360648  | KLHL2    | kelch like family member 2                          | -0.383 |
| 564325866 | ZNF274   | zinc finger protein 274                             | -0.383 |
| 145553966 | CACNA1E  | calcium voltage-gated channel subunit alpha 1 E     | -0.382 |
| 16758114  | CD93     | CD93 molecule                                       | -0.382 |
| 13928886  | MAP2K1   | mitogen-activated protein kinase kinase 1           | -0.382 |
| 564354247 | NPHP4    | nephrocystin 4                                      | -0.382 |
| 76563954  | REXO4    | REX4 homolog, 3'-5' exonuclease                     | -0.382 |
| 62079019  | UFSP2    | UFM1 specific peptidase 2                           | -0.382 |
| 344252018 | N/A      | N/A                                                 | -0.382 |
| 157820795 | BBS1     | Bardet-Biedl syndrome 1                             | -0.381 |
| 42538976  | PGAP1    | post-GPI attachment to proteins 1                   | -0.381 |
| 564336549 | EIF2A    | eukaryotic translation initiation factor 2A         | -0.380 |
| 149044030 | JAG2     | jagged 2                                            | -0.380 |
| 564372688 | RPA1     | replication protein A1                              | -0.380 |



|           |               |                                                                 |        |
|-----------|---------------|-----------------------------------------------------------------|--------|
| 62388885  | YIF1B         | Yip1 interacting factor homolog B, membrane trafficking protein | -0.380 |
| 537212823 | N/A           | N/A                                                             | -0.380 |
| 823419836 | N/A           | N/A                                                             | -0.380 |
| 157818713 | ATM           | ATM serine/threonine kinase                                     | -0.379 |
| 149065235 | Cald1         | caldesmon 1                                                     | -0.379 |
| 157821651 | GUF1          | GUF1 homolog, GTPase                                            | -0.379 |
| 564343174 | PLCB4         | phospholipase C beta 4                                          | -0.379 |
| 109491454 | UTP6          | UTP6, small subunit processome component                        | -0.379 |
| 6678637   | ZBTB14        | zinc finger and BTB domain containing 14                        | -0.379 |
| 12018300  | AKAP6         | A-kinase anchoring protein 6                                    | -0.378 |
| 153218522 | KDEL2         | KDEL motif containing 2                                         | -0.377 |
| 157822619 | PNMA2         | paraneoplastic Ma antigen 2                                     | -0.377 |
| 158631185 | XPO5          | exportin 5                                                      | -0.377 |
| 564334870 | Ap3b1         | adaptor-related protein complex 3, beta 1 subunit               | -0.376 |
| 564367862 | Dst           | dystonin                                                        | -0.376 |
| 158186732 | GFAP          | glial fibrillary acidic protein                                 | -0.376 |
| 149034469 | GNG7          | G protein subunit gamma 7                                       | -0.376 |
| 149064540 | N/A           | N/A                                                             | -0.376 |
| 564372902 | 2810408A11Rik | RIKEN cDNA 2810408A11 gene                                      | -0.375 |
| 149053229 | CAMTA2        | calmodulin binding transcription activator 2                    | -0.375 |
| 564316927 | FRYL          | FRY like transcription coactivator                              | -0.375 |
| 564344520 | LOC102555457  | engulfment and cell motility protein 2-like                     | -0.375 |
| 76096338  | ZEB2          | zinc finger E-box binding homeobox 2                            | -0.375 |
| 149056689 | ZNF180        | zinc finger protein 180                                         | -0.375 |
| 157822881 | CFP           | complement factor properdin                                     | -0.374 |
| 7542357   | QKI           | QKI, KH domain containing RNA binding                           | -0.374 |
| 149055779 | SLC17A6       | solute carrier family 17 member 6                               | -0.374 |
| 281371490 | LAMC1         | laminin subunit gamma 1                                         | -0.373 |
| 300797477 | CUL9          | cullin 9                                                        | -0.372 |
| 48675855  | LGALS8        | galectin 8                                                      | -0.371 |
| 149039905 | TSPAN17       | tetraspanin 17                                                  | -0.371 |
| 672046176 | N/A           | N/A                                                             | -0.371 |
| 6978673   | CNR1          | cannabinoid receptor 1                                          | -0.370 |
| 57527084  | HAT1          | histone acetyltransferase 1                                     | -0.370 |
| 40786505  | MAN2B1        | mannosidase alpha class 2B member 1                             | -0.370 |
| 564330111 | NUP98         | nucleoporin 98                                                  | -0.370 |
| 564377500 | N/A           | N/A                                                             | -0.369 |
| 564341299 | N/A           | N/A                                                             | -0.369 |

|           |          |                                                                                                           |        |
|-----------|----------|-----------------------------------------------------------------------------------------------------------|--------|
| 13592129  | DOC2B    | double C2 domain beta                                                                                     | -0.368 |
| 348605146 | HDAC11   | histone deacetylase 11                                                                                    | -0.368 |
| 255708437 | PIK3CD   | phosphatidylinositol-4,5-bisphosphate 3-kinase catalytic subunit delta                                    | -0.368 |
| 157819667 | SLC41A1  | solute carrier family 41 member 1                                                                         | -0.368 |
| 109466809 | GATB     | glutamyl-tRNA amidotransferase subunit B                                                                  | -0.367 |
| 148668185 | RBM26    | RNA binding motif protein 26                                                                              | -0.367 |
| 149041411 | SC5D     | sterol-C5-desaturase                                                                                      | -0.367 |
| 13592150  | SHARPIN  | SHANK associated RH domain interactor                                                                     | -0.367 |
| 6981700   | VCAM1    | vascular cell adhesion molecule 1                                                                         | -0.367 |
| 149020512 | PDE4A    | phosphodiesterase 4A                                                                                      | -0.366 |
| 78126167  | SLC1A2   | solute carrier family 1 member 2                                                                          | -0.366 |
| 157822669 | SLC36A4  | solute carrier family 36 member 4                                                                         | -0.366 |
| 157822279 | AK5      | adenylate kinase 5                                                                                        | -0.365 |
| 149056708 | NECTIN2  | nectin cell adhesion molecule 2                                                                           | -0.365 |
| 300795339 | RYR2     | ryanodine receptor 2                                                                                      | -0.365 |
| 11024674  | SLC9A3R1 | SLC9A3 regulator 1                                                                                        | -0.365 |
| 403224961 | TRPM7    | transient receptor potential cation channel subfamily M member 7                                          | -0.365 |
| 157822363 | PCDH17   | protocadherin 17                                                                                          | -0.364 |
| 149058577 | Ppfia4   | protein tyrosine phosphatase, receptor type, f polypeptide (PTPRF), interacting protein (liprin), alpha 4 | -0.364 |
| 533133321 | N/A      | N/A                                                                                                       | -0.364 |
| 82617648  | CSMD1    | CUB and Sushi multiple domains 1                                                                          | -0.363 |
| 114052238 | FIG4     | FIG4 phosphoinositide 5-phosphatase                                                                       | -0.363 |
| 109476714 | FOCAD    | focadhesin                                                                                                | -0.363 |
| 149059343 | IL6ST    | interleukin 6 signal transducer                                                                           | -0.363 |
| 402478644 | CARMIL3  | capping protein regulator and myosin 1 linker 3                                                           | -0.362 |
| 210031334 | NGEF     | neuronal guanine nucleotide exchange factor                                                               | -0.362 |
| 568977996 | PXDN     | peroxidasin                                                                                               | -0.362 |
| 564382871 | N/A      | N/A                                                                                                       | -0.362 |
| 392339847 | CADPS2   | calcium dependent secretion activator 2                                                                   | -0.361 |
| 672052705 | FRRS1L   | ferric chelate reductase 1 like                                                                           | -0.361 |
| 564367417 | SRF      | serum response factor                                                                                     | -0.361 |
| 528769450 | N/A      | N/A                                                                                                       | -0.361 |
| 157817286 | EZH1     | enhancer of zeste 1 polycomb repressive complex 2 subunit                                                 | -0.360 |
| 54035529  | SS18     | SS18, nBAF chromatin remodeling complex subunit                                                           | -0.360 |

|           |                             |                                                        |        |
|-----------|-----------------------------|--------------------------------------------------------|--------|
| 564370831 | CASKIN1                     | CASK interacting protein 1                             | -0.359 |
| 40538868  | BABAM2                      | BRISC and BRCA1 A complex member 2                     | -0.358 |
| 41529837  | JUP                         | junction plakoglobin                                   | -0.358 |
| 187937016 | WIPI1                       | WD repeat domain, phosphoinositide interacting 1       | -0.358 |
| 672076515 | N/A                         | N/A                                                    | -0.358 |
| 148667088 | ATP2B2                      | ATPase plasma membrane Ca <sup>2+</sup> transporting 2 | -0.357 |
| 158138517 | FGFR2                       | fibroblast growth factor receptor 2                    | -0.357 |
| 56605668  | FLII                        | FLII, actin remodeling protein                         | -0.357 |
| 62647202  | KRBA1                       | KRAB-A domain containing 1                             | -0.357 |
| 149028347 | LIG1                        | DNA ligase 1                                           | -0.357 |
| 29789104  | NAPB                        | NSF attachment protein beta                            | -0.357 |
| 219803038 | PDE2A                       | phosphodiesterase 2A                                   | -0.356 |
| 197313640 | TMEM132E                    | transmembrane protein 132E                             | -0.356 |
| 672029178 | CCSER2                      | coiled-coil serine rich protein 2                      | -0.354 |
| 9506957   | PCSK7                       | proprotein convertase subtilisin/kexin type 7          | -0.354 |
| 392353178 | SEL1L3                      | SEL1L family member 3                                  | -0.354 |
| 62078997  | WDR1                        | WD repeat domain 1                                     | -0.354 |
| 672063876 | MGC116197 (includes others) | similar to RIKEN cDNA 1700001E04                       | -0.353 |
| 157819941 | PEX26                       | peroxisomal biogenesis factor 26                       | -0.353 |
| 70608092  | SLC9A8                      | solute carrier family 9 member A8                      | -0.353 |
| 300796069 | THADA                       | THADA, armadillo repeat containing                     | -0.353 |
| 672057964 | N/A                         | N/A                                                    | -0.353 |
| 162287198 | HSD17B4                     | hydroxysteroid 17-beta dehydrogenase 4                 | -0.352 |
| 18266684  | MSMO1                       | methylsterol monooxygenase 1                           | -0.352 |
| 197387642 | ZNF710                      | zinc finger protein 710                                | -0.352 |
| 148693587 | N/A                         | N/A                                                    | -0.352 |
| 564317068 | CCDC149                     | coiled-coil domain containing 149                      | -0.351 |
| 149058381 | RNASEL                      | ribonuclease L                                         | -0.351 |
| 299829287 | DISP2                       | dispatched RND transporter family member 2             | -0.350 |
| 115292425 | KIRREL3                     | kin of IRRE like 3 (Drosophila)                        | -0.350 |
| 672041794 | RGD1310081                  | similar to hypothetical protein FLJ13231               | -0.350 |
| 755536182 | RHBDF1                      | rhomboid 5 homolog 1                                   | -0.350 |
| 198278545 | IAH1                        | isoamyl acetate-hydrolyzing esterase 1 homolog         | -0.349 |
| 564342402 | PLA2G4B                     | phospholipase A2 group IVB                             | -0.349 |
| 149066868 | MDM1                        | Mdm1 nuclear protein                                   | -0.348 |
| 38181552  | SCG2                        | secretogranin II                                       | -0.348 |
| 564400341 | N/A                         | N/A                                                    | -0.348 |
| 564332376 | RASGRP2                     | RAS guanyl releasing protein 2                         | -0.347 |

|           |         |                                                                      |        |
|-----------|---------|----------------------------------------------------------------------|--------|
| 30519995  | SFXN5   | sideroflexin 5                                                       | -0.347 |
| 6678297   | TEX261  | testis expressed 261                                                 | -0.347 |
| 296010825 | UBR2    | ubiquitin protein ligase E3 component n-recognin 2                   | -0.347 |
| 187469267 | GPRC5B  | G protein-coupled receptor class C group 5 member B                  | -0.346 |
| 206558322 | JMJD8   | jumonji domain containing 8                                          | -0.346 |
| 913512819 | N/A     | N/A                                                                  | -0.346 |
| 148675460 | ARFRP1  | ADP ribosylation factor related protein 1                            | -0.345 |
| 157822769 | KLF12   | Kruppel like factor 12                                               | -0.345 |
| 77157795  | MAL2    | mal, T-cell differentiation protein 2 (gene/pseudogene)              | -0.345 |
| 54019432  | PCDHA7  | protocadherin alpha 7                                                | -0.345 |
| 672024793 | N/A     | N/A                                                                  | -0.345 |
| 635102546 | N/A     | N/A                                                                  | -0.345 |
| 564385704 | FLNB    | filamin B                                                            | -0.344 |
| 183979966 | HSPG2   | heparan sulfate proteoglycan 2                                       | -0.344 |
| 564372825 | SGSM2   | small G protein signaling modulator 2                                | -0.344 |
| 148707634 | SHISA4  | shisa family member 4                                                | -0.344 |
| 564384429 | N/A     | N/A                                                                  | -0.344 |
| 157822247 | CHORDC1 | cysteine and histidine rich domain containing 1                      | -0.343 |
| 690969206 | MBD6    | methyl-CpG binding domain protein 6                                  | -0.343 |
| 29789305  | PTPRN   | protein tyrosine phosphatase, receptor type N                        | -0.343 |
| 685536524 | N/A     | N/A                                                                  | -0.343 |
| 213688380 | GXYLT1  | glucoside xylosyltransferase 1                                       | -0.342 |
| 57164111  | IFT122  | intraflagellar transport 122                                         | -0.342 |
| 30842796  | MAST1   | microtubule associated serine/threonine kinase 1                     | -0.342 |
| 58865476  | PIGK    | phosphatidylinositol glycan anchor biosynthesis class K              | -0.342 |
| 164607158 | PTPRR   | protein tyrosine phosphatase, receptor type R                        | -0.342 |
| 564397593 | RAB36   | RAB36, member RAS oncogene family                                    | -0.341 |
| 281306814 | RPS6KA2 | ribosomal protein S6 kinase A2                                       | -0.341 |
| 6981574   | SPARC   | secreted protein acidic and cysteine rich                            | -0.341 |
| 8394502   | UBC     | ubiquitin C                                                          | -0.341 |
| 149016843 | N/A     | N/A                                                                  | -0.340 |
| 564372562 | PFAS    | phosphoribosylformylglycinamide synthase                             | -0.339 |
| 564314535 | RUBCN   | RUN and cysteine rich domain containing beclin 1 interacting protein | -0.338 |
| 564330477 | TEAD1   | TEA domain transcription factor 1                                    | -0.337 |

|           |         |                                                                            |        |
|-----------|---------|----------------------------------------------------------------------------|--------|
| 672065543 | TNS1    | tensin 1                                                                   | -0.337 |
| 564301979 | CKAP5   | cytoskeleton associated protein 5                                          | -0.336 |
| 328683463 | LRP4    | LDL receptor related protein 4                                             | -0.336 |
| 149027291 | PDZD2   | PDZ domain containing 2                                                    | -0.336 |
| 564304046 | PLXNA1  | plexin A1                                                                  | -0.336 |
| 672052120 | RBM12B  | RNA binding motif protein 12B                                              | -0.336 |
| 672051414 | N/A     | N/A                                                                        | -0.336 |
| 32527705  | N/A     | N/A                                                                        | -0.336 |
| 148669742 | ADD3    | adducin 3                                                                  | -0.335 |
| 755540019 | N/A     | N/A                                                                        | -0.335 |
| 564349673 | C2CD5   | C2 calcium dependent domain containing 5                                   | -0.334 |
| 840088206 | INTS11  | integrator complex subunit 11                                              | -0.333 |
| 158749540 | NPEPPS  | aminopeptidase puromycin sensitive                                         | -0.333 |
| 58865454  | SCYL1   | SCY1 like pseudokinase 1                                                   | -0.333 |
| 157823901 | TSPAN9  | tetraspanin 9                                                              | -0.333 |
| 564378945 | N/A     | N/A                                                                        | -0.333 |
| 149063401 | ALDH2   | aldehyde dehydrogenase 2 family (mitochondrial)                            | -0.332 |
| 300794608 | CEP120  | centrosomal protein 120                                                    | -0.332 |
| 764020083 | CLUH    | clustered mitochondria homolog                                             | -0.332 |
| 755524429 | Evi5l   | ecotropic viral integration site 5 like                                    | -0.332 |
| 57164145  | NT5DC2  | 5'-nucleotidase domain containing 2                                        | -0.332 |
| 564346102 | N/A     | N/A                                                                        | -0.332 |
| 149022319 | AGPS    | alkylglycerone phosphate synthase                                          | -0.331 |
| 157822141 | KBTBD3  | kelch repeat and BTB domain containing 3                                   | -0.331 |
| 158138535 | NUP107  | nucleoporin 107                                                            | -0.331 |
| 641706489 | N/A     | N/A                                                                        | -0.331 |
| 142349612 | GLUL    | glutamate-ammonia ligase                                                   | -0.330 |
| 109484871 | HERC1   | HECT and RLD domain containing E3 ubiquitin protein ligase family member 1 | -0.330 |
| 57164113  | NSDHL   | NAD(P) dependent steroid dehydrogenase-like                                | -0.330 |
| 227913    | N/A     | N/A                                                                        | -0.330 |
| 564376923 | GOLGB1  | golgin B1                                                                  | -0.329 |
| 564358911 | CHPT1   | choline phosphotransferase 1                                               | -0.328 |
| 16758280  | LYST    | lysosomal trafficking regulator                                            | -0.328 |
| 157822933 | ZNF385A | zinc finger protein 385A                                                   | -0.328 |
| 743735648 | N/A     | N/A                                                                        | -0.328 |
| 11693162  | INSIG1  | insulin induced gene 1                                                     | -0.327 |
| 564364873 | ADAMTS7 | ADAM metallopeptidase with thrombospondin type 1 motif 7                   | -0.326 |

|           |                 |                                                                                  |        |
|-----------|-----------------|----------------------------------------------------------------------------------|--------|
| 157822539 | ANK1            | ankyrin 1                                                                        | -0.326 |
| 157817476 | HECW2           | HECT, C2 and WW domain containing E3 ubiquitin protein ligase 2                  | -0.325 |
| 392348740 | LAMB1           | laminin subunit beta 1                                                           | -0.325 |
| 158186672 | Nedd4           | neural precursor cell expressed, developmentally down-regulated 4                | -0.325 |
| 149062647 | Rfx3            | regulatory factor X3                                                             | -0.325 |
| 157819337 | SLC35B4         | solute carrier family 35 member B4                                               | -0.325 |
| 157819187 | AGL             | amylo-alpha-1, 6-glucosidase, 4-alpha-glucanotransferase                         | -0.324 |
| 564394868 | CC2D1A          | coiled-coil and C2 domain containing 1A                                          | -0.324 |
| 290563168 | DUSP3           | dual specificity phosphatase 3                                                   | -0.324 |
| 157822337 | FGD3            | FYVE, RhoGEF and PH domain containing 3                                          | -0.324 |
| 8393490   | GRM5            | glutamate metabotropic receptor 5                                                | -0.324 |
| 281604190 | INPP5B          | inositol polyphosphate-5-phosphatase B                                           | -0.324 |
| 198041681 | LTN1            | listerin E3 ubiquitin protein ligase 1                                           | -0.324 |
| 27229135  | MARCH8          | membrane associated ring-CH-type finger 8                                        | -0.324 |
| 20376820  | MFN1            | mitofusin 1                                                                      | -0.324 |
| 158186636 | PDGFRA          | platelet derived growth factor receptor alpha                                    | -0.324 |
| 403259801 | N/A             | N/A                                                                              | -0.324 |
| 194473622 | ADSL            | adenylosuccinate lyase                                                           | -0.323 |
| 564325169 | AGPAT4          | 1-acylglycerol-3-phosphate O-acyltransferase 4                                   | -0.323 |
| 157817478 | PIK3C2A         | phosphatidylinositol-4-phosphate 3-kinase catalytic subunit type 2 alpha         | -0.323 |
| 731197958 | N/A             | N/A                                                                              | -0.323 |
| 12831227  | AACS            | acetoacetyl-CoA synthetase                                                       | -0.322 |
| 300795884 | DOCK11          | dedicator of cytokinesis 11                                                      | -0.322 |
| 672068740 | NEWGENE_1308105 | kinase suppressor of ras 1                                                       | -0.322 |
| 564371801 | TBC1D9B         | TBC1 domain family member 9B                                                     | -0.322 |
| 6678349   | TIAL1           | TIA1 cytotoxic granule associated RNA binding protein like 1                     | -0.322 |
| 62078971  | UBLCP1          | ubiquitin like domain containing CTD phosphatase 1                               | -0.322 |
| 149050766 | CAD             | carbamoyl-phosphate synthetase 2, aspartate transcarbamylase, and dihydroorotase | -0.321 |
| 58865808  | CBX6            | chromobox 6                                                                      | -0.321 |
| 9507083   | SEMA4F          | ssemaphorin 4F                                                                   | -0.321 |
| 97537309  | SYNJ1           | synaptojanin 1                                                                   | -0.321 |
| 58865906  | PLD3            | phospholipase D family member 3                                                  | -0.320 |

|           |          |                                                                    |        |
|-----------|----------|--------------------------------------------------------------------|--------|
| 13027430  | WDR7     | WD repeat domain 7                                                 | -0.320 |
| 672084703 | N/A      | N/A                                                                | -0.320 |
| 157822535 | LATS2    | large tumor suppressor kinase 2                                    | -0.319 |
| 16758890  | MYO1B    | myosin IB                                                          | -0.319 |
| 81230489  | PCDHGA8  | protocadherin gamma subfamily A, 8                                 | -0.319 |
| 564379349 | Zcchc8   | zinc finger CCHC-type containing 8                                 | -0.319 |
| 564360941 | N/A      | N/A                                                                | -0.319 |
| 148682503 | IMP4     | IMP4 homolog, U3 small nucleolar ribonucleoprotein                 | -0.318 |
| 826336802 | N/A      | N/A                                                                | -0.318 |
| 223590233 | DDN      | dendrin                                                            | -0.317 |
| 74354506  | ACBD5    | acyl-CoA binding domain containing 5                               | -0.316 |
| 50511316  | AHI1     | Abelson helper integration site 1                                  | -0.316 |
| 564357619 | ITGB8    | integrin subunit beta 8                                            | -0.315 |
| 62078695  | MLEC     | malectin                                                           | -0.314 |
| 67078434  | SLC25A39 | solute carrier family 25 member 39                                 | -0.314 |
| 532042299 | N/A      | N/A                                                                | -0.314 |
| 84662766  | ELAVL4   | ELAV like RNA binding protein 4                                    | -0.313 |
| 56799390  | ATP1B2   | ATPase Na <sup>+</sup> /K <sup>+</sup> transporting subunit beta 2 | -0.312 |
| 11693172  | CALR     | calreticulin                                                       | -0.312 |
| 148704942 | NAMPT    | nicotinamide phosphoribosyltransferase                             | -0.312 |
| 149020944 | PFKP     | phosphofructokinase, platelet                                      | -0.312 |
| 157787028 | SUSD4    | sushi domain containing 4                                          | -0.312 |
| 157817500 | UBAP2    | ubiquitin associated protein 2                                     | -0.312 |
| 148372343 | RAMP2    | receptor activity modifying protein 2                              | -0.311 |
| 672030652 | N/A      | N/A                                                                | -0.311 |
| 672067893 | N/A      | N/A                                                                | -0.311 |
| 925114268 | GTF3C1   | general transcription factor IIIC subunit 1                        | -0.310 |
| 149016209 | SLC4A3   | solute carrier family 4 member 3                                   | -0.310 |
| 634833336 | N/A      | N/A                                                                | -0.310 |
| 777419    | N/A      | N/A                                                                | -0.310 |
| 674093471 | N/A      | N/A                                                                | -0.310 |
| 672041570 | N/A      | N/A                                                                | -0.310 |
| 807677    | N/A      | N/A                                                                | -0.309 |
| 672014573 | N/A      | N/A                                                                | -0.309 |
| 157823930 | PPP2R5A  | protein phosphatase 2 regulatory subunit B'alpha                   | -0.308 |
| 157819753 | RCN1     | reticulocalbin 1                                                   | -0.308 |
| 157820971 | TMEM150C | transmembrane protein 150C                                         | -0.308 |
| 157818787 | BBS4     | Bardet-Biedl syndrome 4                                            | -0.307 |

|           |          |                                                                      |        |
|-----------|----------|----------------------------------------------------------------------|--------|
| 537271325 | N/A      | N/A                                                                  | -0.307 |
| 404501459 | ARHGEF40 | Rho guanine nucleotide exchange factor 40                            | -0.306 |
| 27229304  | ELAC2    | elaC ribonuclease Z 2                                                | -0.306 |
| 149046617 | MAGI2    | membrane associated guanylate kinase, WW and PDZ domain containing 2 | -0.306 |
| 564338426 | N/A      | N/A                                                                  | -0.306 |
| 954249788 | N/A      | N/A                                                                  | -0.306 |
| 664708230 | N/A      | N/A                                                                  | -0.306 |
| 84490431  | DNM3     | dynamain 3                                                           | -0.305 |
| 300794741 | FNDC3B   | fibronectin type III domain containing 3B                            | -0.305 |
| 26378096  | OSTC     | oligosaccharyltransferase complex non-catalytic subunit              | -0.305 |
| 149041432 | THY1     | Thy-1 cell surface antigen                                           | -0.305 |
| 564325846 | Zfp40    | zinc finger protein 40                                               | -0.305 |
| 451172073 | CHRM3    | cholinergic receptor muscarinic 3                                    | -0.304 |
| 148702078 | CPSF3    | cleavage and polyadenylation specific factor 3                       | -0.304 |
| 28972363  | DOCK4    | dedicator of cytokinesis 4                                           | -0.304 |
| 149049163 | GRIN2B   | glutamate ionotropic receptor NMDA type subunit 2B                   | -0.304 |
| 38454284  | PPM1E    | protein phosphatase, Mg <sup>2+</sup> /Mn <sup>2+</sup> dependent 1E | -0.304 |
| 568979427 | RCOR1    | REST corepressor 1                                                   | -0.304 |
| 62543499  | VGLL4    | vestigial like family member 4                                       | -0.304 |
| 149048968 | ITPR2    | inositol 1,4,5-trisphosphate receptor type 2                         | -0.303 |
| 564361015 | TRIOBP   | TRIO and F-actin binding protein                                     | -0.303 |
| 157821429 | BAZ2A    | bromodomain adjacent to zinc finger domain 2A                        | -0.302 |
| 197246191 | PDXDC1   | pyridoxal dependent decarboxylase domain containing 1                | -0.302 |
| 765099237 | XRN1     | 5'-3' exoribonuclease 1                                              | -0.302 |
| 50510855  | RIMKLB   | ribosomal modification protein rimK like family member B             | -0.301 |
| 51948538  | ZMYND10  | zinc finger MYND-type containing 10                                  | -0.301 |
| 33299962  | CAMK1G   | calcium/calmodulin dependent protein kinase IG                       | -0.300 |
| 149029475 | EPG5     | ectopic P-granules autophagy protein 5 homolog                       | -0.300 |
| 564367517 | ADGRF5   | adhesion G protein-coupled receptor F5                               | -0.299 |
| 564387864 | CACNA1D  | calcium voltage-gated channel subunit alpha 1 D                      | -0.299 |
| 148696689 | MFAP3L   | microfibrillar associated protein 3 like                             | -0.299 |



|           |           |                                                                          |        |
|-----------|-----------|--------------------------------------------------------------------------|--------|
| 59858990  | UNC13A    | unc-13 homolog A                                                         | -0.299 |
| 672088357 | ZCCHC18   | zinc finger CCHC-type containing 18                                      | -0.299 |
| 293349986 | SMCHD1    | structural maintenance of chromosomes flexible hinge domain containing 1 | -0.298 |
| 672017219 | ZNF106    | zinc finger protein 106                                                  | -0.298 |
| 149022622 | ACP2      | acid phosphatase 2, lysosomal                                            | -0.297 |
| 815891121 | ZEB1      | zinc finger E-box binding homeobox 1                                     | -0.297 |
| 189339241 | MAN2A1    | mannosidase alpha class 2A member 1                                      | -0.296 |
| 149024245 | RSRP1     | arginine and serine rich protein 1                                       | -0.296 |
| 157820653 | TMEM63C   | transmembrane protein 63C                                                | -0.296 |
| 568938931 | TRRAP     | transformation/transcription domain associated protein                   | -0.296 |
| 672019307 | N/A       | N/A                                                                      | -0.296 |
| 9507167   | SYNGR1    | synaptogyrin 1                                                           | -0.295 |
| 68163551  | TBC1D22B  | TBC1 domain family member 22B                                            | -0.295 |
| 807677    | N/A       | N/A                                                                      | -0.295 |
| 198278430 | OSBPL9    | oxysterol binding protein like 9                                         | -0.294 |
| 37360344  | PDCD6IP   | programmed cell death 6 interacting protein                              | -0.294 |
| 13928780  | POR       | cytochrome p450 oxidoreductase                                           | -0.294 |
| 686661093 | SLC24A3   | solute carrier family 24 member 3                                        | -0.294 |
| 157817560 | ZCCHC7    | zinc finger CCHC-type containing 7                                       | -0.294 |
| 568986622 | CNIH1     | cornichon family AMPA receptor auxiliary protein 1                       | -0.293 |
| 380876953 | MYO10     | myosin X                                                                 | -0.293 |
| 62078459  | CEP95     | centrosomal protein 95                                                   | -0.292 |
| 157822873 | FBXO18    | F-box protein, helicase, 18                                              | -0.292 |
| 25742763  | HSPA5     | heat shock protein family A (Hsp70) member 5                             | -0.292 |
| 564328017 | RASIP1    | Ras interacting protein 1                                                | -0.292 |
| 157820833 | HERC3     | HECT and RLD domain containing E3 ubiquitin protein ligase 3             | -0.291 |
| 731267527 | N/A       | N/A                                                                      | -0.291 |
| 655879926 | N/A       | N/A                                                                      | -0.291 |
| 157817971 | FAM13B    | family with sequence similarity 13 member B                              | -0.290 |
| 149017194 | KDM3B     | lysine demethylase 3B                                                    | -0.290 |
| 270288740 | MAOA      | monoamine oxidase A                                                      | -0.290 |
| 61556891  | OSBPL2    | oxysterol binding protein like 2                                         | -0.290 |
| 296470851 | PABPC1L2A | poly(A) binding protein cytoplasmic 1 like 2A                            | -0.290 |
| 157821191 | CHST11    | carbohydrate sulfotransferase 11                                         | -0.289 |
| 285026506 | IDUA      | iduronidase, alpha-L-                                                    | -0.289 |
| 77993374  | ARSB      | arylsulfatase B                                                          | -0.288 |

|           |         |                                                                      |        |
|-----------|---------|----------------------------------------------------------------------|--------|
| 57528238  | PEPD    | peptidase D                                                          | -0.288 |
| 149058978 | EDIL3   | EGF like repeats and discoidin domains 3                             | -0.287 |
| 71795664  | MAGI1   | membrane associated guanylate kinase, WW and PDZ domain containing 1 | -0.287 |
| 148283739 | SELENOO | selenoprotein O                                                      | -0.287 |
| 157821127 | TROVE2  | TROVE domain family member 2                                         | -0.287 |
| 672061591 | N/A     | N/A                                                                  | -0.287 |
| 564347675 | AAK1    | AP2 associated kinase 1                                              | -0.286 |
| 672035097 | LENG8   | leukocyte receptor cluster member 8                                  | -0.286 |
| 564364473 | RNF111  | ring finger protein 111                                              | -0.286 |
| 38259192  | TOP2A   | topoisomerase (DNA) II alpha                                         | -0.286 |
| 564314389 | DZIP3   | DAZ interacting zinc finger protein 3                                | -0.285 |
| 392333710 | COL4A2  | collagen type IV alpha 2 chain                                       | -0.284 |
| 672083212 | N/A     | N/A                                                                  | -0.284 |
| 344255506 | N/A     | N/A                                                                  | -0.284 |
| 62339281  | ADAM9   | ADAM metallopeptidase domain 9                                       | -0.283 |
| 124486885 | LRRC7   | leucine rich repeat containing 7                                     | -0.283 |
| 157821205 | PAOX    | polyamine oxidase                                                    | -0.283 |
| 56605656  | DONSON  | downstream neighbor of SON                                           | -0.282 |
| 564396646 | VAR2    | valyl-tRNA synthetase 2, mitochondrial                               | -0.282 |
| 672042073 | N/A     | N/A                                                                  | -0.282 |
| 674043799 | N/A     | N/A                                                                  | -0.282 |
| 568950414 | ATXN2L  | ataxin 2 like                                                        | -0.281 |
| 148689929 | CYFIP1  | cytoplasmic FMR1 interacting protein 1                               | -0.281 |
| 576796148 | MAP7D2  | MAP7 domain containing 2                                             | -0.281 |
| 56090433  | GLT8D1  | glycosyltransferase 8 domain containing 1                            | -0.280 |
| 672085253 | SPG7    | SPG7, paraplegin matrix AAA peptidase subunit                        | -0.280 |
| 149056749 | Clasrp  | CLK4-associating serine/arginine rich protein                        | -0.279 |
| 157823031 | IPO4    | importin 4                                                           | -0.279 |
| 1335860   | PRKAG1  | protein kinase AMP-activated non-catalytic subunit gamma 1           | -0.279 |
| 334724478 | SRGAP1  | SLIT-ROBO Rho GTPase activating protein 1                            | -0.279 |
| 281604092 | VCAN    | versican                                                             | -0.279 |
| 149016025 | N/A     | N/A                                                                  | -0.279 |
| 19705443  | MYO9A   | myosin IXA                                                           | -0.278 |
| 149066394 | SAMD12  | sterile alpha motif domain containing 12                             | -0.278 |
| 672022833 | Scaper  | S-phase cyclin A-associated protein in the ER                        | -0.278 |
| 859862188 | N/A     | N/A                                                                  | -0.278 |
| 564337214 | FAM189B | family with sequence similarity 189 member B                         | -0.277 |

|           |                 |                                                                   |        |
|-----------|-----------------|-------------------------------------------------------------------|--------|
| 114145640 | LOC499219       | hypothetical protein LOC499219                                    | -0.277 |
| 62078801  | MEF2A           | myocyte enhancer factor 2A                                        | -0.277 |
| 672088848 | PLXNA3          | plexin A3                                                         | -0.277 |
| 672052597 | ABCA1           | ATP binding cassette subfamily A member 1                         | -0.276 |
| 157818605 | ABCG4           | ATP binding cassette subfamily G member 4                         | -0.276 |
| 54312094  | DAGLA           | diacylglycerol lipase alpha                                       | -0.276 |
| 754169724 | SERINC5         | serine incorporator 5                                             | -0.276 |
| 293346766 | TCAF1           | TRPM8 channel associated factor 1                                 | -0.276 |
| 564312952 | ZZEF1           | zinc finger ZZ-type and EF-hand domain containing 1               | -0.276 |
| 19173794  | LOC678813/Marf1 | similar to limkain b1                                             | -0.275 |
| 672022994 | NEO1            | neogenin 1                                                        | -0.275 |
| 62079039  | PHKB            | phosphorylase kinase regulatory subunit beta                      | -0.275 |
| 635147633 | N/A             | N/A                                                               | -0.275 |
| 53759110  | CR1L            | complement C3b/C4b receptor 1 like                                | -0.274 |
| 67846040  | POMK            | protein-O-mannose kinase                                          | -0.274 |
| 564361228 | TTL1            | tubulin tyrosine ligase like 1                                    | -0.274 |
| 114052795 | AMZ1            | archaelysin family metalloproteinase 1                            | -0.273 |
| 672066638 | CLEC16A         | C-type lectin domain containing 16A                               | -0.273 |
| 145312274 | EPHA6           | EPH receptor A6                                                   | -0.273 |
| 25006379  | GUCY1A3         | guanylate cyclase 1 soluble subunit alpha                         | -0.273 |
| 469469055 | KCNQ3           | potassium voltage-gated channel subfamily Q member 3              | -0.273 |
| 564305530 | PTPRD           | protein tyrosine phosphatase, receptor type D                     | -0.273 |
| 537146226 | N/A             | N/A                                                               | -0.273 |
| 564298436 | WDR11           | WD repeat domain 11                                               | -0.272 |
| 11993954  | METAP2          | methionyl aminopeptidase 2                                        | -0.271 |
| 20127390  | RNF112          | ring finger protein 112                                           | -0.271 |
| 70778983  | SFPQ            | splicing factor proline and glutamine rich                        | -0.271 |
| 148695071 | STK39           | serine/threonine kinase 39                                        | -0.271 |
| 12018268  | ADCY5           | adenylate cyclase 5                                               | -0.270 |
| 157821679 | ANAPC4          | anaphase promoting complex subunit 4                              | -0.270 |
| 62650795  | DACT1           | dishevelled binding antagonist of beta catenin 1                  | -0.270 |
| 148680991 | PLXNA2          | plexin A2                                                         | -0.270 |
| 149019021 | Sh3bgrl2        | SH3 domain binding glutamate-rich protein like 2                  | -0.270 |
| 281485606 | STT3B           | STT3B, catalytic subunit of the oligosaccharyltransferase complex | -0.270 |
| 564313504 | TEX2            | testis expressed 2                                                | -0.270 |
| 672084347 | N/A             | N/A                                                               | -0.270 |

|           |                         |                                                             |        |
|-----------|-------------------------|-------------------------------------------------------------|--------|
| 672048013 | N/A                     | N/A                                                         | -0.270 |
| 17865325  | GLRB                    | glycine receptor beta                                       | -0.269 |
| 672038527 | PLEKHA1                 | pleckstrin homology domain containing A1                    | -0.269 |
| 584277046 | SLC1A3                  | solute carrier family 1 member 3                            | -0.269 |
| 537233715 | N/A                     | N/A                                                         | -0.269 |
| 564390898 | KIF13A                  | kinesin family member 13A                                   | -0.268 |
| 392342224 | N/A                     | N/A                                                         | -0.268 |
| 9506469   | CD47                    | CD47 molecule                                               | -0.267 |
| 564314685 | EIF4G1                  | eukaryotic translation initiation factor 4 gamma 1          | -0.267 |
| 6981076   | IDE                     | insulin degrading enzyme                                    | -0.267 |
| 157822211 | CTC1                    | CST telomere replication complex component 1                | -0.266 |
| 157824032 | Ptprt                   | protein tyrosine phosphatase, receptor type, T              | -0.266 |
| 913500389 | N/A                     | N/A                                                         | -0.266 |
| 564342542 | MAP1A                   | microtubule associated protein 1A                           | -0.265 |
| 157816949 | NOMO1 (includes others) | NODAL modulator 1                                           | -0.264 |
| 984094253 | N/A                     | N/A                                                         | -0.264 |
| 300797892 | C2CD3                   | C2 calcium dependent domain containing 3                    | -0.262 |
| 157818225 | CNTNAP4                 | contactin associated protein like 4                         | -0.262 |
| 149053315 | CAMKK1                  | calcium/calmodulin dependent protein kinase kinase 1        | -0.261 |
| 672050038 | NDNF                    | neuron derived neurotrophic factor                          | -0.261 |
| 564370872 | N/A                     | N/A                                                         | -0.261 |
| 119226197 | CXXC1                   | CXXC finger protein 1                                       | -0.260 |
| 564385664 | FERMT2                  | fermitin family member 2                                    | -0.260 |
| 149028240 | Fsd1                    | fibronectin type III and SPRY domain containing 1           | -0.260 |
| 564334920 | HMGCR                   | 3-hydroxy-3-methylglutaryl-CoA reductase                    | -0.260 |
| 291084699 | TDRKH                   | tudor and KH domain containing                              | -0.260 |
| 913512216 | N/A                     | N/A                                                         | -0.260 |
| 672061209 | N/A                     | N/A                                                         | -0.260 |
| 564397229 | ANKS1A                  | ankyrin repeat and sterile alpha motif domain containing 1A | -0.259 |
| 564299655 | FAM169A                 | family with sequence similarity 169 member A                | -0.259 |
| 148828533 | NALCN                   | sodium leak channel, non-selective                          | -0.259 |
| 312283667 | WNK1                    | WNK lysine deficient protein kinase 1                       | -0.259 |
| 149048608 | N/A                     | N/A                                                         | -0.259 |
| 46048420  | CLU                     | clusterin                                                   | -0.258 |
| 148677354 | CNOT10                  | CCR4-NOT transcription complex subunit 10                   | -0.258 |

|           |         |                                                                                    |        |
|-----------|---------|------------------------------------------------------------------------------------|--------|
| 22902132  | RBM10   | RNA binding motif protein 10                                                       | -0.258 |
| 207113155 | SELENOI | selenoprotein I                                                                    | -0.258 |
| 76096306  | VAT1    | vesicle amine transport 1                                                          | -0.258 |
| 157823887 | MLC1    | megalencephalic leukoencephalopathy with subcortical cysts 1                       | -0.257 |
| 37359962  | PLPPR4  | phospholipid phosphatase related 4                                                 | -0.257 |
| 61556910  | SNX10   | sorting nexin 10                                                                   | -0.257 |
| 672079582 | N/A     | N/A                                                                                | -0.257 |
| 672016955 | MAP3K20 | mitogen-activated protein kinase kinase kinase 20                                  | -0.256 |
| 67846078  | TMEM55A | transmembrane protein 55A                                                          | -0.256 |
| 568928882 | ZFYVE9  | zinc finger FYVE-type containing 9                                                 | -0.256 |
| 675747737 | N/A     | N/A                                                                                | -0.256 |
| 21322238  | CABP7   | calcium binding protein 7                                                          | -0.255 |
| 157817995 | DOT1L   | DOT1 like histone lysine methyltransferase                                         | -0.255 |
| 149041904 | GLCE    | glucuronic acid epimerase                                                          | -0.255 |
| 564382292 | ANGEL2  | angel homolog 2                                                                    | -0.254 |
| 392337767 | AP3B2   | adaptor related protein complex 3 beta 2 subunit                                   | -0.254 |
| 157819725 | CEP131  | centrosomal protein 131                                                            | -0.254 |
| 149030303 | ELP3    | elongator acetyltransferase complex subunit 3                                      | -0.254 |
| 564388440 | MYO9B   | myosin IXB                                                                         | -0.254 |
| 564374356 | ADAM11  | ADAM metallopeptidase domain 11                                                    | -0.253 |
| 300793879 | BAZ1B   | bromodomain adjacent to zinc finger domain 1B                                      | -0.253 |
| 47087105  | RGL2    | ral guanine nucleotide dissociation stimulator like 2                              | -0.253 |
| 724945729 | N/A     | N/A                                                                                | -0.253 |
| 148695758 | CAPRIN1 | cell cycle associated protein 1                                                    | -0.252 |
| 415703079 | NEBL    | nebullette                                                                         | -0.252 |
| 115432015 | RASA3   | RAS p21 protein activator 3                                                        | -0.252 |
| 564359927 | RIMS2   | regulating synaptic membrane exocytosis 2                                          | -0.252 |
| 67846010  | ROGDI   | rogdi homolog                                                                      | -0.252 |
| 6981672   | Tpm4    | tropomyosin 4                                                                      | -0.252 |
| 564322686 | N/A     | N/A                                                                                | -0.252 |
| 148677779 | N/A     | N/A                                                                                | -0.252 |
| 48675845  | ATIC    | 5-aminoimidazole-4-carboxamide ribonucleotide formyltransferase/IMP cyclohydrolase | -0.251 |
| 564392757 | NOL4    | nucleolar protein 4                                                                | -0.251 |

|           |          |                                                                  |        |
|-----------|----------|------------------------------------------------------------------|--------|
| 124249077 | POLR2E   | RNA polymerase II subunit E                                      | -0.251 |
| 8394354   | SQLE     | squalene epoxidase                                               | -0.251 |
| 672037929 | TNRC6A   | trinucleotide repeat containing 6A                               | -0.251 |
| 158341644 | USP54    | ubiquitin specific peptidase 54                                  | -0.251 |
| 564352388 | N/A      | N/A                                                              | -0.251 |
| 411147403 | APLP2    | amyloid beta precursor like protein 2                            | -0.250 |
| 157817456 | C2CD4C   | C2 calcium dependent domain containing 4C                        | -0.250 |
| 148697866 | FAM3A    | family with sequence similarity 3 member A                       | -0.250 |
| 148708948 | PRPF4B   | pre-mRNA processing factor 4B                                    | -0.250 |
| 13027442  | ARHGEF11 | Rho guanine nucleotide exchange factor 11                        | -0.249 |
| 148703921 | FNDC3A   | fibronectin type III domain containing 3A                        | -0.249 |
| 564323143 | Gprasp2  | G protein-coupled receptor associated sorting protein 2          | -0.249 |
| 157817620 | PSD2     | pleckstrin and Sec7 domain containing 2                          | -0.249 |
| 149027971 | ATF6B    | activating transcription factor 6 beta                           | -0.248 |
| 564334013 | GBF1     | golgi brefeldin A resistant guanine nucleotide exchange factor 1 | -0.247 |
| 157817839 | SEMA5A   | semaphorin 5A                                                    | -0.247 |
| 15805026  | ZFAND6   | zinc finger AN1-type containing 6                                | -0.247 |
| 148683809 | N/A      | N/A                                                              | -0.247 |
| 594629505 | N/A      | N/A                                                              | -0.247 |
| 672040941 | ATRNL1   | attractin like 1                                                 | -0.246 |
| 9506591   | FDFT1    | farnesyl-diphosphate farnesyltransferase 1                       | -0.246 |
| 564345393 | PRKAG2   | protein kinase AMP-activated non-catalytic subunit gamma 2       | -0.246 |
| 148701638 | SEPT8    | septin 8                                                         | -0.246 |
| 564387640 | DOCK9    | dedicator of cytokinesis 9                                       | -0.245 |
| 6981208   | NR3C2    | nuclear receptor subfamily 3 group C member 2                    | -0.245 |
| 224471866 | UGGT1    | UDP-glucose glycoprotein glucosyltransferase 1                   | -0.245 |
| 444728185 | N/A      | N/A                                                              | -0.245 |
| 148672873 | PTPRK    | protein tyrosine phosphatase, receptor type K                    | -0.244 |
| 564327171 | ACTN4    | actinin alpha 4                                                  | -0.243 |
| 149016256 | IRS1     | insulin receptor substrate 1                                     | -0.243 |
| 281604229 | LAS1L    | LAS1 like, ribosome biogenesis factor                            | -0.243 |
| 33413429  | NTRK3    | neurotrophic receptor tyrosine kinase 3                          | -0.243 |
| 40786489  | ARHGEF25 | Rho guanine nucleotide exchange factor 25                        | -0.242 |
| 170016079 | ATP13A1  | ATPase 13A1                                                      | -0.242 |
| 564309890 | CBL      | Cbl proto-oncogene                                               | -0.242 |
| 56090393  | DCAKD    | dephospho-CoA kinase domain containing                           | -0.242 |
| 72255531  | EFHD2    | EF-hand domain family member D2                                  | -0.242 |

|           |          |                                                       |        |
|-----------|----------|-------------------------------------------------------|--------|
| 30061483  | HAP1     | huntingtin associated protein 1                       | -0.242 |
| 226874873 | GUK1     | guanylate kinase 1                                    | -0.241 |
| 158303324 | ITGB1    | integrin subunit beta 1                               | -0.241 |
| 672019361 | TMEM245  | transmembrane protein 245                             | -0.241 |
| 564311572 | N/A      | N/A                                                   | -0.241 |
| 196115100 | CSTF2    | cleavage stimulation factor subunit 2                 | -0.240 |
| 62078863  | ZCCHC12  | zinc finger CCHC-type containing 12                   | -0.240 |
| 55742755  | CTNNA1   | catenin alpha 1                                       | -0.239 |
| 300793877 | DOPEY2   | dopey family member 2                                 | -0.239 |
| 81295339  | TECPR1   | tectonin beta-propeller repeat containing 1           | -0.239 |
| 149048094 | N/A      | N/A                                                   | -0.239 |
| 686713740 | N/A      | N/A                                                   | -0.239 |
| 149634159 | N/A      | N/A                                                   | -0.239 |
| 294845709 | OCRL     | OCRL, inositol polyphosphate-5-phosphatase            | -0.237 |
| 149066130 | PLEC     | plectin                                               | -0.237 |
| 61557085  | SPTBN1   | spectrin beta, non-erythrocytic 1                     | -0.237 |
| 157821453 | TBC1D10B | TBC1 domain family member 10B                         | -0.237 |
| 157822357 | SLC25A23 | solute carrier family 25 member 23                    | -0.236 |
| 564347453 | ALMS1    | ALMS1, centrosome and basal body associated protein   | -0.235 |
| 564299821 | PARP8    | poly(ADP-ribose) polymerase family member 8           | -0.235 |
| 158186708 | PDCD11   | programmed cell death 11                              | -0.235 |
| 13786144  | PREP     | prolyl endopeptidase                                  | -0.235 |
| 148682490 | RAB23    | RAB23, member RAS oncogene family                     | -0.235 |
| 77404395  | SND1     | staphylococcal nuclease and tudor domain containing 1 | -0.235 |
| 149067833 | ALDOA    | aldolase, fructose-bisphosphate A                     | -0.234 |
| 201023331 | MAPK11   | mitogen-activated protein kinase 11                   | -0.234 |
| 109467956 | PPP1R26  | protein phosphatase 1 regulatory subunit 26           | -0.234 |
| 197245729 | CPSF1    | cleavage and polyadenylation specific factor 1        | -0.233 |
| 564382183 | EPRS     | glutamyl-prolyl-tRNA synthetase                       | -0.233 |
| 48675867  | PLPP3    | phospholipid phosphatase 3                            | -0.233 |
| 159163110 | N/A      | N/A                                                   | -0.233 |
| 149024626 | EXOSC10  | exosome component 10                                  | -0.232 |
| 149041012 | SMYD2    | SET and MYND domain containing 2                      | -0.232 |
| 564400604 | THOC2    | THO complex 2                                         | -0.232 |
| 157819829 | HACD3    | 3-hydroxyacyl-CoA dehydratase 3                       | -0.230 |
| 26006243  | KCND2    | potassium voltage-gated channel subfamily D member 2  | -0.230 |
| 189083764 | MARS     | methionyl-tRNA synthetase                             | -0.230 |

|           |          |                                                          |        |
|-----------|----------|----------------------------------------------------------|--------|
| 281604211 | RAB3GAP2 | RAB3 GTPase activating non-catalytic protein subunit 2   | -0.230 |
| 148710162 | SLC8A2   | solute carrier family 8 member A2                        | -0.230 |
| 158711736 | SMC2     | structural maintenance of chromosomes 2                  | -0.230 |
| 157819077 | TRIM37   | tripartite motif containing 37                           | -0.230 |
| 537146709 | N/A      | N/A                                                      | -0.230 |
| 56090241  | THTPA    | thiamine triphosphatase                                  | -0.229 |
| 564397109 | N/A      | N/A                                                      | -0.229 |
| 564344160 | CHD6     | chromodomain helicase DNA binding protein 6              | -0.228 |
| 109464982 | KIAA0922 | KIAA0922                                                 | -0.228 |
| 157819469 | SHPRH    | SNF2 histone linker PHD RING helicase                    | -0.228 |
| 913505527 | N/A      | N/A                                                      | -0.228 |
| 148693489 | Nrgn     | neurogranin                                              | -0.227 |
| 25742576  | NXF1     | nuclear RNA export factor 1                              | -0.227 |
| 18543353  | SLC5A6   | solute carrier family 5 member 6                         | -0.227 |
| 267133    | TIMP2    | TIMP metalloproteinase inhibitor 2                       | -0.227 |
| 564400166 | ACSL4    | acyl-CoA synthetase long-chain family member 4           | -0.226 |
| 149052868 | MFAP4    | microfibrillar associated protein 4                      | -0.226 |
| 56090291  | PIGQ     | phosphatidylinositol glycan anchor biosynthesis class Q  | -0.226 |
| 717324516 | SCN8A    | sodium voltage-gated channel alpha subunit 8             | -0.226 |
| 57351     | Tgoln1   | trans-golgi network protein                              | -0.226 |
| 672081765 | N/A      | N/A                                                      | -0.226 |
| 564328949 | N/A      | N/A                                                      | -0.226 |
| 189163481 | ISYNA1   | inositol-3-phosphate synthase 1                          | -0.225 |
| 148681399 | SZRD1    | SUZ RNA binding domain containing 1                      | -0.225 |
| 18677755  | ADGRL3   | adhesion G protein-coupled receptor L3                   | -0.224 |
| 149061951 | CORO1B   | coronin 1B                                               | -0.224 |
| 564382544 | ZNF644   | zinc finger protein 644                                  | -0.224 |
| 148747421 | IGFBP2   | insulin like growth factor binding protein 2             | -0.223 |
| 564329414 | IKBKG    | inhibitor of nuclear factor kappa B kinase subunit gamma | -0.223 |
| 283837871 | LRP1     | LDL receptor related protein 1                           | -0.223 |
| 198278525 | RIC8A    | RIC8 guanine nucleotide exchange factor A                | -0.221 |
| 281306738 | PCDH19   | protocadherin 19                                         | -0.220 |
| 861445795 | N/A      | N/A                                                      | -0.220 |
| 564393851 | N/A      | N/A                                                      | -0.220 |
| 148689145 | CPNE4    | copine 4                                                 | -0.219 |
| 149045522 | PNISR    | PNN interacting serine and arginine rich protein         | -0.219 |



|           |          |                                                                        |        |
|-----------|----------|------------------------------------------------------------------------|--------|
| 13242271  | SLC6A11  | solute carrier family 6 member 11                                      | -0.218 |
| 74151445  | Zranb2   | zinc finger, RAN-binding domain containing 2                           | -0.218 |
| 149031313 | N/A      | N/A                                                                    | -0.218 |
| 625251453 | N/A      | N/A                                                                    | -0.218 |
| 672088942 | ATP2B3   | ATPase plasma membrane Ca <sup>2+</sup> transporting 3                 | -0.217 |
| 148687519 | CALN1    | calneuron 1                                                            | -0.217 |
| 12621120  | SFXN3    | sideroflexin 3                                                         | -0.216 |
| 78000203  | Tpm1     | tropomyosin 1, alpha                                                   | -0.216 |
| 157819361 | TTYH1    | tweety family member 1                                                 | -0.216 |
| 744541945 | N/A      | N/A                                                                    | -0.216 |
| 731271938 | N/A      | N/A                                                                    | -0.216 |
| 11559947  | CASK     | calcium/calmodulin dependent serine protein kinase                     | -0.215 |
| 16923964  | CNTN1    | contactin 1                                                            | -0.215 |
| 57526927  | LARS     | leucyl-tRNA synthetase                                                 | -0.215 |
| 767172165 | NOTCH2   | notch 2                                                                | -0.215 |
| 9507177   | USO1     | USO1 vesicle transport factor                                          | -0.215 |
| 672039485 | N/A      | N/A                                                                    | -0.215 |
| 157821335 | GPR162   | G protein-coupled receptor 162                                         | -0.214 |
| 40786511  | MICU1    | mitochondrial calcium uptake 1                                         | -0.214 |
| 564315812 | NAV1     | neuron navigator 1                                                     | -0.214 |
| 149034828 | N/A      | N/A                                                                    | -0.214 |
| 672034978 | N/A      | N/A                                                                    | -0.214 |
| 47846864  | CADM1    | cell adhesion molecule 1                                               | -0.213 |
| 13786140  | CELSR3   | cadherin EGF LAG seven-pass G-type receptor 3                          | -0.213 |
| 197209847 | JAK1     | Janus kinase 1                                                         | -0.212 |
| 1334149   | N/A      | N/A                                                                    | -0.212 |
| 755533955 | ANK3     | ankyrin 3                                                              | -0.211 |
| 21070934  | CALCOCO1 | calcium binding and coiled-coil domain 1                               | -0.211 |
| 149031313 | N/A      | N/A                                                                    | -0.211 |
| 35215304  | CLMP     | CXADR like membrane protein                                            | -0.210 |
| 155369271 | PRKACA   | protein kinase cAMP-activated catalytic subunit alpha                  | -0.210 |
| 564344879 | N/A      | N/A                                                                    | -0.210 |
| 56090379  | POMGNT1  | protein O-linked mannose N-acetylglucosaminyltransferase 1 (beta 1,2-) | -0.209 |
| 564385371 | SEC24C   | SEC24 homolog C, COPII coat complex component                          | -0.209 |
| 149050844 | DNMT3A   | DNA methyltransferase 3 alpha                                          | -0.208 |

|           |          |                                                                                                      |        |
|-----------|----------|------------------------------------------------------------------------------------------------------|--------|
| 47059112  | EHMT2    | euchromatic histone lysine methyltransferase 2                                                       | -0.208 |
| 564385965 | SALL2    | spalt like transcription factor 2                                                                    | -0.208 |
| 300793998 | SHISA6   | shisa family member 6                                                                                | -0.207 |
| 77628157  | ST18     | ST18, C2H2C-type zinc finger                                                                         | -0.207 |
| 39104626  | CAMK2A   | calcium/calmodulin dependent protein kinase II alpha                                                 | -0.206 |
| 472824971 | MEGF8    | multiple EGF like domains 8                                                                          | -0.206 |
| 109488292 | POLR2A   | RNA polymerase II subunit A                                                                          | -0.206 |
| 730229363 | RALGAPA1 | Ral GTPase activating protein catalytic alpha subunit 1                                              | -0.206 |
| 55741502  | ACAT2    | acetyl-CoA acetyltransferase 2                                                                       | -0.205 |
| 57164101  | EPS15    | epidermal growth factor receptor pathway substrate 15                                                | -0.205 |
| 157821895 | GDAP1    | ganglioside induced differentiation associated protein 1                                             | -0.205 |
| 568941844 | IQSEC3   | IQ motif and Sec7 domain 3                                                                           | -0.205 |
| 148681975 | NXPH1    | neurexophilin 1                                                                                      | -0.205 |
| 6981166   | PLAGL1   | PLAG1 like zinc finger 1                                                                             | -0.205 |
| 564301794 | UBR3     | ubiquitin protein ligase E3 component n-recognin 3 (putative)                                        | -0.205 |
| 537236584 | N/A      | N/A                                                                                                  | -0.205 |
| 209413778 | GABRA2   | gamma-aminobutyric acid type A receptor alpha2 subunit                                               | -0.204 |
| 18266726  | PAICS    | phosphoribosylaminoimidazole carboxylase and phosphoribosylaminoimidazolesuccinocarboxamide synthase | -0.204 |
| 672026416 | PRR36    | proline rich 36                                                                                      | -0.204 |
| 62078785  | Slc25a22 | solute carrier family 25 member 22                                                                   | -0.204 |
| 537235061 | N/A      | N/A                                                                                                  | -0.204 |
| 6978723   | CTSV     | cathepsin V                                                                                          | -0.203 |
| 564370968 | MAPK8IP3 | mitogen-activated protein kinase 8 interacting protein 3                                             | -0.203 |
| 13929124  | PPIG     | peptidylprolyl isomerase G                                                                           | -0.203 |
| 672035153 | PPP1R12C | protein phosphatase 1 regulatory subunit 12C                                                         | -0.203 |
| 149016230 | ACSL3    | acyl-CoA synthetase long-chain family member 3                                                       | -0.201 |
| 747019224 | SRCAP    | Snf2 related CREBBP activator protein                                                                | -0.201 |
| 460838694 | Srrm2    | serine/arginine repetitive matrix 2                                                                  | -0.201 |
| 11560002  | AMPH     | amphiphysin                                                                                          | -0.200 |
| 6978699   | CPD      | carboxypeptidase D                                                                                   | -0.200 |

|           |          |                                                              |        |
|-----------|----------|--------------------------------------------------------------|--------|
| 157817710 | FER      | FER tyrosine kinase                                          | -0.200 |
| 158303294 | GLS      | glutaminase                                                  | -0.200 |
| 585652696 | N/A      | N/A                                                          | -0.200 |
| 672017118 | N/A      | N/A                                                          | -0.200 |
| 472381467 | N/A      | N/A                                                          | -0.199 |
| 537141312 | N/A      | N/A                                                          | -0.199 |
| 85861200  | NARF     | nuclear prelamin A recognition factor                        | -0.198 |
| 10946604  | SEC61A2  | Sec61 translocon alpha 2 subunit                             | -0.198 |
| 57770372  | ATL1     | atlastin GTPase 1                                            | -0.197 |
| 113461996 | COA5     | cytochrome c oxidase assembly factor 5                       | -0.197 |
| 189163506 | DNAJC10  | DnaJ heat shock protein family (Hsp40) member C10            | -0.197 |
| 564392854 | KIAA1328 | KIAA1328                                                     | -0.197 |
| 13489067  | NSF      | N-ethylmaleimide sensitive factor, vesicle fusing ATPase     | -0.197 |
| 26328955  | ETNK1    | ethanolamine kinase 1                                        | -0.196 |
| 157822919 | GANAB    | glucosidase II alpha subunit                                 | -0.196 |
| 8393450   | GLG1     | golgi glycoprotein 1                                         | -0.196 |
| 156139151 | PDS5B    | PDS5 cohesin associated factor B                             | -0.196 |
| 13929002  | PFKM     | phosphofructokinase, muscle                                  | -0.196 |
| 564311487 | LONRF2   | LON peptidase N-terminal domain and ring finger 2            | -0.195 |
| 672068926 | N/A      | N/A                                                          | -0.195 |
| 161760632 | ACLY     | ATP citrate lyase                                            | -0.194 |
| 19705535  | PACS1    | phosphofurin acidic cluster sorting protein 1                | -0.194 |
| 672042689 | RAPGEF2  | Rap guanine nucleotide exchange factor 2                     | -0.194 |
| 564355754 | SNX13    | sorting nexin 13                                             | -0.194 |
| 524962788 | N/A      | N/A                                                          | -0.194 |
| 655898351 | N/A      | N/A                                                          | -0.194 |
| 564328626 | HERC2    | HECT and RLD domain containing E3 ubiquitin protein ligase 2 | -0.193 |
| 9506947   | PAK3     | p21 (RAC1) activated kinase 3                                | -0.193 |
| 184160976 | PRMT5    | protein arginine methyltransferase 5                         | -0.193 |
| 672041603 | N/A      | N/A                                                          | -0.193 |
| 564379306 | N/A      | N/A                                                          | -0.193 |
| 26006191  | ARHGEF2  | Rho/Rac guanine nucleotide exchange factor 2                 | -0.192 |
| 760996272 | EHBP1    | EH domain binding protein 1                                  | -0.192 |
| 564310645 | PLXNB1   | plexin B1                                                    | -0.192 |
| 29126232  | SLCO3A1  | solute carrier organic anion transporter family member 3A1   | -0.192 |

|           |                             |                                                           |        |
|-----------|-----------------------------|-----------------------------------------------------------|--------|
| 880942118 | N/A                         | N/A                                                       | -0.192 |
| 568981376 | DIP2C                       | disco interacting protein 2 homolog C                     | -0.191 |
| 399124797 | KIFC2                       | kinesin family member C2                                  | -0.191 |
| 399567836 | IDI1                        | isopentenyl-diphosphate delta isomerase 1                 | -0.190 |
| 300794237 | LIMCH1                      | LIM and calponin homology domains 1                       | -0.190 |
| 148709219 | UNC5A                       | unc-5 netrin receptor A                                   | -0.190 |
| 149030541 | N/A                         | N/A                                                       | -0.190 |
| 60360272  | KLHL5                       | kelch like family member 5                                | -0.189 |
| 564389540 | MGC116197 (includes others) | similar to RIKEN cDNA 1700001E04                          | -0.189 |
| 157817201 | NETO1                       | neuropilin and tolloid like 1                             | -0.189 |
| 16758210  | NUCB1                       | nucleobindin 1                                            | -0.189 |
| 148698430 | N/A                         | N/A                                                       | -0.189 |
| 300795842 | CACHD1                      | cache domain containing 1                                 | -0.188 |
| 71896543  | SHANK3                      | SH3 and multiple ankyrin repeat domains 3                 | -0.188 |
| 19424342  | ZHX1                        | zinc fingers and homeoboxes 1                             | -0.188 |
| 806704487 | Palm2                       | paralemmin 2                                              | -0.187 |
| 288806592 | PRKCB                       | protein kinase C beta                                     | -0.187 |
| 396941666 | Dync1i2                     | dynein cytoplasmic 1 intermediate chain 2                 | -0.186 |
| 564346409 | HIPK2                       | homeodomain interacting protein kinase 2                  | -0.186 |
| 404312657 | NCAN                        | neurocan                                                  | -0.186 |
| 201066352 | ANKRD6                      | ankyrin repeat domain 6                                   | -0.185 |
| 115311606 | MAPK3                       | mitogen-activated protein kinase 3                        | -0.185 |
| 52345385  | PDIA6                       | protein disulfide isomerase family A member 6             | -0.185 |
| 166063985 | PKN1                        | protein kinase N1                                         | -0.184 |
| 564337070 | N/A                         | N/A                                                       | -0.184 |
| 149033803 | CDKL2                       | cyclin dependent kinase like 2                            | -0.183 |
| 37360128  | CNTNAP2                     | contactin associated protein-like 2                       | -0.183 |
| 564396135 | KIAA0513                    | KIAA0513                                                  | -0.183 |
| 157816911 | SNRNP48                     | small nuclear ribonucleoprotein U11/U12 subunit 48        | -0.183 |
| 60360568  | GRIA3                       | glutamate ionotropic receptor AMPA type subunit 3         | -0.182 |
| 161760675 | DNAJC14                     | DnaJ heat shock protein family (Hsp40) member C14         | -0.181 |
| 51948398  | SARAF                       | store-operated calcium entry associated regulatory factor | -0.181 |
| 241666396 | CLK1                        | CDC like kinase 1                                         | -0.180 |
| 124487463 | GPR161                      | G protein-coupled receptor 161                            | -0.180 |
| 60360580  | OGDH                        | oxoglutarate dehydrogenase                                | -0.180 |

|           |          |                                                                     |        |
|-----------|----------|---------------------------------------------------------------------|--------|
| 157818589 | TSPAN7   | tetraspanin 7                                                       | -0.180 |
| 13928946  | SMC1A    | structural maintenance of chromosomes 1A                            | -0.179 |
| 6978543   | ATP1A1   | ATPase Na <sup>+</sup> /K <sup>+</sup> transporting subunit alpha 1 | -0.178 |
| 149069395 | CUL7     | cullin 7                                                            | -0.178 |
| 157823569 | EXOC6B   | exocyst complex component 6B                                        | -0.178 |
| 29789269  | GRIA1    | glutamate ionotropic receptor AMPA type subunit 1                   | -0.178 |
| 198386334 | KDM4B    | lysine demethylase 4B                                               | -0.178 |
| 953875962 | N/A      | N/A                                                                 | -0.178 |
| 564377814 | N/A      | N/A                                                                 | -0.178 |
| 282158057 | ASTN1    | astrotactin 1                                                       | -0.177 |
| 148695341 | CTNND1   | catenin delta 1                                                     | -0.177 |
| 73661200  | SPRN     | shadow of prion protein                                             | -0.177 |
| 157820315 | IPO7     | importin 7                                                          | -0.176 |
| 11560079  | KIT      | KIT proto-oncogene receptor tyrosine kinase                         | -0.176 |
| 78042585  | MAGED2   | MAGE family member D2                                               | -0.176 |
| 149067028 | Ppp1r12a | protein phosphatase 1, regulatory subunit 12A                       | -0.176 |
| 674099552 | N/A      | N/A                                                                 | -0.176 |
| 8393038   | CAPN2    | calpain 2                                                           | -0.175 |
| 242117994 | KIAA0408 | KIAA0408                                                            | -0.175 |
| 672080674 | Myo16    | myosin XVI                                                          | -0.175 |
| 76253845  | PELP1    | proline, glutamate and leucine rich protein 1                       | -0.175 |
| 564338482 | SORT1    | sortilin 1                                                          | -0.175 |
| 755550800 | ADGRB1   | adhesion G protein-coupled receptor B1                              | -0.174 |
| 11560055  | KHDRBS3  | KH RNA binding domain containing, signal transduction associated 3  | -0.174 |
| 56605704  | SERINC3  | serine incorporator 3                                               | -0.174 |
| 67078522  | SLC39A6  | solute carrier family 39 member 6                                   | -0.174 |
| 9966775   | NOTCH3   | notch 3                                                             | -0.173 |
| 672026392 | PNPLA6   | patatin like phospholipase domain containing 6                      | -0.173 |
| 8392888   | AKT2     | AKT serine/threonine kinase 2                                       | -0.172 |
| 149059533 | NFIB     | nuclear factor I B                                                  | -0.172 |
| 208973274 | SRSF12   | serine and arginine rich splicing factor 12                         | -0.172 |
| 27545420  | TAOK1    | TAO kinase 1                                                        | -0.172 |
| 672058640 | N/A      | N/A                                                                 | -0.172 |
| 46485382  | BHLHB9   | basic helix-loop-helix family member b9                             | -0.171 |
| 14091754  | GRIP1    | glutamate receptor interacting protein 1                            | -0.170 |
| 50510837  | KIAA1191 | KIAA1191                                                            | -0.170 |
| 404501516 | RBM14    | RNA binding motif protein 14                                        | -0.170 |
| 37360274  | N/A      | N/A                                                                 | -0.170 |

|           |          |                                                            |        |
|-----------|----------|------------------------------------------------------------|--------|
| 402534517 | EPB41L1  | erythrocyte membrane protein band 4.1 like 1               | -0.169 |
| 148673922 | HSPH1    | heat shock protein family H (Hsp110) member 1              | -0.169 |
| 281485565 | RASGRF1  | Ras protein specific guanine nucleotide releasing factor 1 | -0.169 |
| 989935538 | N/A      | N/A                                                        | -0.169 |
| 17864836  | CACNA1C  | calcium voltage-gated channel subunit alpha1 C             | -0.168 |
| 157817420 | NRIP3    | nuclear receptor interacting protein 3                     | -0.168 |
| 403224975 | SBF1     | SET binding factor 1                                       | -0.168 |
| 564400602 | STAG2    | stromal antigen 2                                          | -0.168 |
| 564389912 | N/A      | N/A                                                        | -0.168 |
| 149052114 | CACNA1H  | calcium voltage-gated channel subunit alpha1 H             | -0.167 |
| 13592131  | DGKZ     | diacylglycerol kinase zeta                                 | -0.167 |
| 6978465   | GRK2     | G protein-coupled receptor kinase 2                        | -0.167 |
| 472359423 | N/A      | N/A                                                        | -0.167 |
| 695917192 | Nacad    | NAC alpha domain containing                                | -0.166 |
| 109505096 | NID1     | nidogen 1                                                  | -0.166 |
| 157820677 | B4GALNT4 | beta-1,4-N-acetyl-galactosaminyltransferase 4              | -0.165 |
| 6978795   | EEF2K    | eukaryotic elongation factor 2 kinase                      | -0.165 |
| 283046651 | PTPRZ1   | protein tyrosine phosphatase, receptor type Z1             | -0.165 |
| 14249130  | LASP1    | LIM and SH3 protein 1                                      | -0.164 |
| 27806017  | NCALD    | neurocalcin delta                                          | -0.164 |
| 157817708 | PPP6R2   | protein phosphatase 6 regulatory subunit 2                 | -0.164 |
| 19745186  | CREB1    | cAMP responsive element binding protein 1                  | -0.163 |
| 740086795 | POLR2B   | RNA polymerase II subunit B                                | -0.163 |
| 62654101  | U2SURP   | U2 snRNP associated SURP domain containing                 | -0.163 |
| 149032502 | VPS41    | VPS41, HOPS complex subunit                                | -0.163 |
| 392353562 | ATP8A2   | ATPase phospholipid transporting 8A2                       | -0.161 |
| 77415383  | HSPA8    | heat shock protein family A (Hsp70) member 8               | -0.160 |
| 148671603 | LRP11    | LDL receptor related protein 11                            | -0.160 |
| 13929208  | Scd2     | stearoyl-Coenzyme A desaturase 2                           | -0.160 |
| 676282501 | N/A      | N/A                                                        | -0.160 |
| 62945282  | C16orf62 | chromosome 16 open reading frame 62                        | -0.159 |
| 6981200   | MFGE8    | milk fat globule-EGF factor 8 protein                      | -0.158 |
| 114145542 | ARHGAP5  | Rho GTPase activating protein 5                            | -0.157 |
| 564343665 | HM13     | histocompatibility minor 13                                | -0.157 |
| 564396924 | PRRC2A   | proline rich coiled-coil 2A                                | -0.157 |
| 19705545  | RAB3IL1  | RAB3A interacting protein like 1                           | -0.157 |
| 281306746 | TFRC     | transferrin receptor                                       | -0.157 |
| 9507159   | SYN1     | synapsin I                                                 | -0.156 |

|           |              |                                                                            |        |
|-----------|--------------|----------------------------------------------------------------------------|--------|
| 16758936  | ABCC5        | ATP binding cassette subfamily C member 5                                  | -0.155 |
| 148672025 | MAP3K12      | mitogen-activated protein kinase kinase kinase 12                          | -0.155 |
| 6981352   | PFKL         | phosphofructokinase, liver type                                            | -0.155 |
| 672071784 | PI4KA        | phosphatidylinositol 4-kinase alpha                                        | -0.155 |
| 310688893 | TNKS         | tankyrase                                                                  | -0.155 |
| 672044935 | N/A          | N/A                                                                        | -0.155 |
| 6978755   | DCC          | DCC netrin 1 receptor                                                      | -0.154 |
| 568985444 | CADPS        | calcium dependent secretion activator                                      | -0.153 |
| 568916417 | N/A          | N/A                                                                        | -0.153 |
| 564347477 | ZNF638       | zinc finger protein 638                                                    | -0.152 |
| 214010196 | DNMT1        | DNA methyltransferase 1                                                    | -0.151 |
| 148747541 | HNRNPU       | heterogeneous nuclear ribonucleoprotein U                                  | -0.150 |
| 734703982 | SAFB2        | scaffold attachment factor B2                                              | -0.150 |
| 148669929 | DRAM2        | DNA damage regulated autophagy modulator 2                                 | -0.149 |
| 56605814  | PITPNM1      | phosphatidylinositol transfer protein membrane associated 1                | -0.149 |
| 208973288 | PREX1        | phosphatidylinositol-3,4,5-trisphosphate dependent Rac exchange factor 1   | -0.149 |
| 149044802 | USP34        | ubiquitin specific peptidase 34                                            | -0.149 |
| 157819455 | VPS13D       | vacuolar protein sorting 13 homolog D                                      | -0.149 |
| 73532768  | COPG1        | coatamer protein complex subunit gamma 1                                   | -0.148 |
| 209870013 | ITSN1        | intersectin 1                                                              | -0.148 |
| 300797536 | MICAL3       | microtubule associated monooxygenase, calponin and LIM domain containing 3 | -0.148 |
| 148682872 | MTOR         | mechanistic target of rapamycin                                            | -0.148 |
| 37359942  | MTSS1        | MTSS1, I-BAR domain containing                                             | -0.147 |
| 148703340 | SERTM1       | serine rich and transmembrane domain containing 1                          | -0.146 |
| 564353622 | UBR4         | ubiquitin protein ligase E3 component n-recognin 4                         | -0.146 |
| 149043744 | CABIN1       | calcineurin binding protein 1                                              | -0.144 |
| 148700348 | ZMYND11      | zinc finger MYND-type containing 11                                        | -0.144 |
| 403225003 | KCNQ5        | potassium voltage-gated channel subfamily Q member 5                       | -0.142 |
| 157822435 | PGM2L1       | phosphoglucomutase 2 like 1                                                | -0.142 |
| 564352958 | C1orf216     | chromosome 1 open reading frame 216                                        | -0.141 |
| 40254785  | LAMP2        | lysosomal associated membrane protein 2                                    | -0.141 |
| 45478142  | LOC108353803 | uncharacterized LOC108353803                                               | -0.141 |
| 568910783 | CDC42BPA     | CDC42 binding protein kinase alpha                                         | -0.140 |

|           |           |                                                           |        |
|-----------|-----------|-----------------------------------------------------------|--------|
| 145312253 | REV3L     | REV3 like, DNA directed polymerase zeta catalytic subunit | -0.139 |
| 568974914 | SRCIN1    | SRC kinase signaling inhibitor 1                          | -0.139 |
| 672059390 | N/A       | N/A                                                       | -0.139 |
| 672089019 | N/A       | N/A                                                       | -0.139 |
| 13540675  | LRRN3     | leucine rich repeat neuronal 3                            | -0.138 |
| 26023947  | NRP1      | neuropilin 1                                              | -0.138 |
| 398650648 | SLC8A1    | solute carrier family 8 member A1                         | -0.138 |
| 938319566 | LDHB      | lactate dehydrogenase B                                   | -0.137 |
| 52138628  | RAP1B     | RAP1B, member of RAS oncogene family                      | -0.137 |
| 537236381 | N/A       | N/A                                                       | -0.135 |
| 521032446 | N/A       | N/A                                                       | -0.135 |
| 259155312 | AGAP2     | ArfGAP with GTPase domain, ankyrin repeat and PH domain 2 | -0.134 |
| 149017161 | APC       | APC, WNT signaling pathway regulator                      | -0.134 |
| 149018602 | HYAL1     | hyaluronoglucosaminidase 1                                | -0.134 |
| 300798434 | TENM4     | teneurin transmembrane protein 4                          | -0.134 |
| 6980956   | GLUD1     | glutamate dehydrogenase 1                                 | -0.133 |
| 197927419 | RNF14     | ring finger protein 14                                    | -0.133 |
| 672073809 | N/A       | N/A                                                       | -0.133 |
| 16758224  | PPP1R9A   | protein phosphatase 1 regulatory subunit 9A               | -0.132 |
| 625184908 | N/A       | N/A                                                       | -0.132 |
| 399498531 | NDRG2     | NDRG family member 2                                      | -0.131 |
| 744603535 | N/A       | N/A                                                       | -0.131 |
| 829910413 | N/A       | N/A                                                       | -0.130 |
| 35215315  | Ccdc50    | coiled-coil domain containing 50                          | -0.129 |
| 672053016 | LOC691387 | similar to HBxAg transactivated protein 2                 | -0.129 |
| 224960    | N/A       | N/A                                                       | -0.129 |
| 564364956 | TFDP2     | transcription factor Dp-2                                 | -0.128 |
| 672068312 | N/A       | N/A                                                       | -0.128 |
| 224967068 | PLCB1     | phospholipase C beta 1                                    | -0.127 |
| 564398462 | Slc9a7    | solute carrier family 9 member A7                         | -0.127 |
| 42821116  | NCAM2     | neural cell adhesion molecule 2                           | -0.126 |
| 940760818 | N/A       | N/A                                                       | -0.126 |
| 149050659 | BIRC6     | baculoviral IAP repeat containing 6                       | -0.125 |
| 672083507 | LOC361346 | similar to chromosome 18 open reading frame 54            | -0.125 |
| 564369793 | N/A       | N/A                                                       | -0.125 |
| 47058982  | SPTB      | spectrin beta, erythrocytic                               | -0.124 |
| 675670628 | N/A       | N/A                                                       | -0.124 |



|           |          |                                                                            |        |
|-----------|----------|----------------------------------------------------------------------------|--------|
| 148747253 | ATP1B1   | ATPase Na <sup>+</sup> /K <sup>+</sup> transporting subunit beta 1         | -0.122 |
| 758818575 | Peg3     | paternally expressed 3                                                     | -0.122 |
| 12621130  | SLIT1    | slit guidance ligand 1                                                     | -0.120 |
| 157824053 | PPFIA2   | PTPRF interacting protein alpha 2                                          | -0.119 |
| 564318589 | N/A      | N/A                                                                        | -0.119 |
| 300794532 | ARHGAP21 | Rho GTPase activating protein 21                                           | -0.118 |
| 253683488 | NTRK2    | neurotrophic receptor tyrosine kinase 2                                    | -0.118 |
| 149023410 | SNAP25   | synaptosome associated protein 25                                          | -0.118 |
| 209571464 | USP9X    | ubiquitin specific peptidase 9, X-linked                                   | -0.118 |
| 672044124 | N/A      | N/A                                                                        | -0.118 |
| 672049471 | N/A      | N/A                                                                        | -0.117 |
| 13929102  | APBA2    | amyloid beta precursor protein binding family A member 2                   | -0.116 |
| 226958320 | DENND5A  | DENN domain containing 5A                                                  | -0.116 |
| 16758726  | SLC17A7  | solute carrier family 17 member 7                                          | -0.116 |
| 564364792 | SNAP91   | synaptosome associated protein 91                                          | -0.116 |
| 158711717 | SNX27    | sorting nexin family member 27                                             | -0.116 |
| 148677026 | EPM2AIP1 | EPM2A interacting protein 1                                                | -0.115 |
| 149053570 | WSB1     | WD repeat and SOCS box containing 1                                        | -0.115 |
| 148666837 | MGLL     | monoglyceride lipase                                                       | -0.114 |
| 209915579 | TMX4     | thioredoxin related transmembrane protein 4                                | -0.113 |
| 198278523 | AP3D1    | adaptor related protein complex 3 delta 1 subunit                          | -0.112 |
| 149043706 | PRMT2    | protein arginine methyltransferase 2                                       | -0.112 |
| 674077166 | N/A      | N/A                                                                        | -0.112 |
| 672073607 | N/A      | N/A                                                                        | -0.112 |
| 6756037   | YWHAH    | tyrosine 3-monooxygenase/tryptophan 5-monooxygenase activation protein eta | -0.111 |
| 672088045 | N/A      | N/A                                                                        | -0.111 |
| 815890893 | CD81     | CD81 molecule                                                              | -0.110 |
| 149032539 | HECW1    | HECT, C2 and WW domain containing E3 ubiquitin protein ligase 1            | -0.110 |
| 164519074 | PDE4D    | phosphodiesterase 4D                                                       | -0.110 |
| 640831572 | N/A      | N/A                                                                        | -0.110 |
| 13786196  | ATRNL1   | attractin                                                                  | -0.109 |
| 25282419  | CANX     | calnexin                                                                   | -0.107 |
| 157822407 | MAST2    | microtubule associated serine/threonine kinase 2                           | -0.107 |
| 148695277 | SESTD1   | SEC14 and spectrin domain containing 1                                     | -0.107 |
| 77627981  | SHANK1   | SH3 and multiple ankyrin repeat domains 1                                  | -0.107 |

|           |         |                                                                                                   |        |
|-----------|---------|---------------------------------------------------------------------------------------------------|--------|
| 17985955  | Dclk1   | doublecortin-like kinase 1                                                                        | -0.105 |
| 672054406 | N/A     | N/A                                                                                               | -0.103 |
| 672063358 | CLASP2  | cytoplasmic linker associated protein 2                                                           | -0.101 |
| 149020473 | SMARCA4 | SWI/SNF related, matrix associated, actin dependent regulator of chromatin, subfamily a, member 4 | -0.101 |
| 29789307  | KIF1B   | kinesin family member 1B                                                                          | -0.098 |
| 564355241 | NCOA1   | nuclear receptor coactivator 1                                                                    | -0.088 |
| 149055603 | N/A     | N/A                                                                                               | -0.087 |
| 148694359 | MYO5A   | myosin VA                                                                                         | -0.086 |
| 564379895 | SEZ6L   | seizure related 6 homolog like                                                                    | -0.086 |
| 20301986  | Gpm6b   | glycoprotein m6b                                                                                  | -0.085 |
| 298231227 | PSAP    | prosaposin                                                                                        | -0.083 |
| 38372401  | NRCAM   | neuronal cell adhesion molecule                                                                   | -0.080 |
| 148706565 | N/A     | N/A                                                                                               | -0.079 |
| 148704375 | PABPN1  | poly(A) binding protein nuclear 1                                                                 | -0.076 |
| 880889979 | N/A     | N/A                                                                                               | -0.076 |
| 744542371 | N/A     | N/A                                                                                               | -0.074 |
| 149022387 | NCKAP1  | NCK associated protein 1                                                                          | -0.073 |
| 124286791 | CELF2   | CUGBP Elav-like family member 2                                                                   | -0.069 |
| 148679159 | GNAO1   | G protein subunit alpha o1                                                                        | -0.069 |
| 148692349 | ATP1A3  | ATPase Na <sup>+</sup> /K <sup>+</sup> transporting subunit alpha 3                               | -0.064 |
| 55249691  | CPE     | carboxypeptidase E                                                                                | -0.060 |
| 148673176 | FABP7   | fatty acid binding protein 7                                                                      | -0.057 |
| 149047906 | STRBP   | spermatid perinuclear RNA binding protein                                                         | -0.055 |
| 40254595  | DPYSL2  | dihydropyrimidinase like 2                                                                        | -0.051 |
| 676279510 | N/A     | N/A                                                                                               | -0.049 |
| 825725    | SNRNP70 | small nuclear ribonucleoprotein U1 subunit 70                                                     | -0.046 |
| 545838484 | N/A     | N/A                                                                                               | -0.045 |
| 568955606 | INTS10  | integrator complex subunit 10                                                                     | -0.044 |
| 28189917  | Ubb     | ubiquitin B                                                                                       | -0.042 |
| 564351830 | N/A     | N/A                                                                                               | -0.040 |
| 158749620 | MAP1B   | microtubule associated protein 1B                                                                 | -0.033 |
| 744617549 | N/A     | N/A                                                                                               | -0.028 |
| 564392534 | Gpr137b | G protein-coupled receptor 137B                                                                   | -0.024 |
| 57634518  | SEPT11  | septin 11                                                                                         | -0.013 |
| 2266994   | OGT     | O-linked N-acetylglucosamine (GlcNAc) transferase                                                 | -0.008 |
| 12667448  | Syt7    | synaptotagmin 7                                                                                   | 0.005  |

|           |          |                                                                    |       |
|-----------|----------|--------------------------------------------------------------------|-------|
| 157819423 | SPSB3    | splA/ryanodine receptor domain and SOCS box containing 3           | 0.009 |
| 62087776  | SYNCRIP  | synaptotagmin binding cytoplasmic RNA interacting protein          | 0.017 |
| 16758950  | CSNK1A1  | casein kinase 1 alpha 1                                            | 0.025 |
| 255291787 | DBN1     | drebrin 1                                                          | 0.027 |
| 148683063 | GNB1     | G protein subunit beta 1                                           | 0.027 |
| 564352872 | N/A      | N/A                                                                | 0.031 |
| 57526804  | SUB1     | SUB1 homolog, transcriptional regulator                            | 0.036 |
| 157820391 | TULP4    | tubby like protein 4                                               | 0.038 |
| 50510503  | SH3GLB1  | SH3 domain containing GRB2 like, endophilin B1                     | 0.041 |
| 13242233  | STMN3    | stathmin 3                                                         | 0.048 |
| 564391098 | SSR1     | signal sequence receptor subunit 1                                 | 0.049 |
| 16758674  | CSNK2A1  | casein kinase 2 alpha 1                                            | 0.050 |
| 672070615 | TTC3     | tetratricopeptide repeat domain 3                                  | 0.050 |
| 14165437  | HNRNPK   | heterogeneous nuclear ribonucleoprotein K                          | 0.052 |
| 586556217 | N/A      | N/A                                                                | 0.056 |
| 12711692  | DPYSL5   | dihydropyrimidinase like 5                                         | 0.057 |
| 7305363   | PAFAH1B1 | platelet activating factor acetylhydrolase 1b regulatory subunit 1 | 0.060 |
| 22129759  | ZWINT    | ZW10 interacting kinetochore protein                               | 0.061 |
| 998662027 | N/A      | N/A                                                                | 0.061 |
| 28467005  | HSP90AA1 | heat shock protein 90 alpha family class A member 1                | 0.063 |
| 585192925 | N/A      | N/A                                                                | 0.063 |
| 585645604 | N/A      | N/A                                                                | 0.063 |
| 87299586  | Fbnp11   | formin binding protein 1-like                                      | 0.064 |
| 407728599 | CTNND2   | catenin delta 2                                                    | 0.066 |
| 8394158   | FASN     | fatty acid synthase                                                | 0.068 |
| 347300280 | CLSTN1   | calsyntenin 1                                                      | 0.070 |
| 157820133 | TTYH3    | tweety family member 3                                             | 0.073 |
| 564398411 | N/A      | N/A                                                                | 0.076 |
| 158303318 | MAPT     | microtubule associated protein tau                                 | 0.077 |
| 826351127 | N/A      | N/A                                                                | 0.081 |
| 560954566 | N/A      | N/A                                                                | 0.081 |
| 913517850 | N/A      | N/A                                                                | 0.082 |
| 13786162  | CDH2     | cadherin 2                                                         | 0.083 |
| 8393296   | EEF2     | eukaryotic translation elongation factor 2                         | 0.084 |
| 17978461  | BRINP1   | BMP/retinoic acid inducible neural specific 1                      | 0.087 |

|           |        |                                                                 |       |
|-----------|--------|-----------------------------------------------------------------|-------|
| 820983550 | N/A    | N/A                                                             | 0.087 |
| 51948418  | EEF1G  | eukaryotic translation elongation factor 1 gamma                | 0.088 |
| 149049455 | Ptms   | parathymosin                                                    | 0.088 |
| 4503529   | EIF4A1 | eukaryotic translation initiation factor 4A1                    | 0.089 |
| 18543359  | MARK3  | microtubule affinity regulating kinase 3                        | 0.089 |
| 6978449   | ADD2   | adducin 2                                                       | 0.093 |
| 157821213 | KIF21B | kinesin family member 21B                                       | 0.095 |
| 189095264 | UBTF   | upstream binding transcription factor, RNA polymerase I         | 0.095 |
| 18677765  | PALM   | paralemmin                                                      | 0.096 |
| 37359970  | SDC3   | syndecan 3                                                      | 0.098 |
| 114145618 | MIS12  | MIS12, kinetochore complex component                            | 0.099 |
| 281371335 | WDR6   | WD repeat domain 6                                              | 0.100 |
| 25742568  | DPYSL3 | dihydropyrimidinase like 3                                      | 0.101 |
| 12004976  | NDFIP1 | Nedd4 family interacting protein 1                              | 0.101 |
| 12850126  | STMN2  | stathmin 2                                                      | 0.101 |
| 528762703 | N/A    | N/A                                                             | 0.101 |
| 672055757 | N/A    | N/A                                                             | 0.101 |
| 149028085 | BAG6   | BCL2 associated athanogene 6                                    | 0.102 |
| 61889073  | MATR3  | matrin 3                                                        | 0.102 |
| 511905488 | N/A    | N/A                                                             | 0.103 |
| 676280076 | N/A    | N/A                                                             | 0.103 |
| 74210167  | DDX5   | DEAD-box helicase 5                                             | 0.105 |
| 15126683  | DNAJC5 | DnaJ heat shock protein family (Hsp40) member C5                | 0.105 |
| 51172604  | JPH4   | junctionophilin 4                                               | 0.105 |
| 62078555  | MLLT11 | myeloid/lymphoid or mixed-lineage leukemia; translocated to, 11 | 0.106 |
| 564301352 | PRRC2B | proline rich coiled-coil 2B                                     | 0.106 |
| 704584573 | N/A    | N/A                                                             | 0.106 |
| 148672704 | CSNK1E | casein kinase 1 epsilon                                         | 0.109 |
| 242397499 | DCHS1  | dachsous cadherin-related 1                                     | 0.109 |
| 261878588 | WDR13  | WD repeat domain 13                                             | 0.110 |
| 537149923 | N/A    | N/A                                                             | 0.110 |
| 93352570  | ATCAY  | ATCAY, caytaxin                                                 | 0.111 |
| 58865558  | TUBA1C | tubulin alpha 1c                                                | 0.111 |
| 157817085 | ADGRB2 | adhesion G protein-coupled receptor B2                          | 0.113 |
| 148702066 | N/A    | N/A                                                             | 0.113 |
| 12861068  | CFL1   | cofilin 1                                                       | 0.114 |

|           |         |                                                           |       |
|-----------|---------|-----------------------------------------------------------|-------|
| 564363529 | NCAM1   | neural cell adhesion molecule 1                           | 0.116 |
| 507546779 | N/A     | N/A                                                       | 0.116 |
| 148227578 | ITFG1   | integrin alpha FG-GAP repeat containing 1                 | 0.117 |
| 149063507 | PEBP1   | phosphatidylethanolamine binding protein 1                | 0.117 |
| 120538101 | RTN3    | reticulon 3                                               | 0.117 |
| 13929006  | RAB2A   | RAB2A, member RAS oncogene family                         | 0.118 |
| 926720695 | N/A     | N/A                                                       | 0.118 |
| 74212223  | RPL8    | ribosomal protein L8                                      | 0.119 |
| 672068062 | ARF1    | ADP ribosylation factor 1                                 | 0.120 |
| 755524534 | ARHGEF7 | Rho guanine nucleotide exchange factor 7                  | 0.121 |
| 344252784 | N/A     | N/A                                                       | 0.121 |
| 755492511 | MAP4K4  | mitogen-activated protein kinase kinase kinase kinase 4   | 0.122 |
| 66730447  | NUDT3   | nudix hydrolase 3                                         | 0.123 |
| 672047825 | N/A     | N/A                                                       | 0.123 |
| 554543965 | N/A     | N/A                                                       | 0.123 |
| 74145569  | BNIP2   | BCL2 interacting protein 2                                | 0.124 |
| 347361005 | USP22   | ubiquitin specific peptidase 22                           | 0.124 |
| 564301979 | CKAP5   | cytoskeleton associated protein 5                         | 0.125 |
| 675970145 | N/A     | N/A                                                       | 0.127 |
| 987937084 | N/A     | N/A                                                       | 0.127 |
| 725607246 | N/A     | N/A                                                       | 0.128 |
| 157817558 | JAKMIP2 | janus kinase and microtubule interacting protein 2        | 0.129 |
| 244792650 | TNIK    | TRAF2 and NCK interacting kinase                          | 0.129 |
| 149065002 | PHF14   | PHD finger protein 14                                     | 0.130 |
| 70778952  | RAD23B  | RAD23 homolog B, nucleotide excision repair protein       | 0.130 |
| 564346502 | N/A     | N/A                                                       | 0.130 |
| 27465617  | ABI2    | abl interactor 2                                          | 0.131 |
| 149046410 | ARHGEF4 | Rho guanine nucleotide exchange factor 4                  | 0.131 |
| 58865642  | PAQR3   | progesterin and adipoQ receptor family member 3           | 0.131 |
| 672082099 | N/A     | N/A                                                       | 0.131 |
| 171846760 | HDAC2   | histone deacetylase 2                                     | 0.132 |
| 12408334  | NOLC1   | nucleolar and coiled-body phosphoprotein 1                | 0.132 |
| 564326930 | MAP3K10 | mitogen-activated protein kinase kinase kinase 10         | 0.133 |
| 987926417 | N/A     | N/A                                                       | 0.133 |
| 157824115 | AGAP3   | ArfGAP with GTPase domain, ankyrin repeat and PH domain 3 | 0.134 |

|           |         |                                                               |       |
|-----------|---------|---------------------------------------------------------------|-------|
| 76253725  | CCT6A   | chaperonin containing TCP1 subunit 6A                         | 0.134 |
| 201066380 | FSCN1   | fascin actin-bundling protein 1                               | 0.134 |
| 149042824 | UBE2V1  | ubiquitin conjugating enzyme E2 V1                            | 0.134 |
| 672057722 | N/A     | N/A                                                           | 0.134 |
| 537242782 | N/A     | N/A                                                           | 0.134 |
| 83582792  | FAM117B | family with sequence similarity 117 member B                  | 0.135 |
| 29336093  | Tpm3    | tropomyosin 3                                                 | 0.135 |
| 148666815 | CNBP    | CCHC-type zinc finger nucleic acid binding protein            | 0.136 |
| 148699288 | N/A     | N/A                                                           | 0.136 |
| 281340051 | N/A     | N/A                                                           | 0.137 |
| 625259717 | N/A     | N/A                                                           | 0.137 |
| 351710149 | N/A     | N/A                                                           | 0.137 |
| 926686110 | N/A     | N/A                                                           | 0.138 |
| 157818315 | CUL3    | cullin 3                                                      | 0.139 |
| 672045791 | Tlk1    | tousled-like kinase 1                                         | 0.139 |
| 803119291 | N/A     | N/A                                                           | 0.140 |
| 755756742 | N/A     | N/A                                                           | 0.140 |
| 528767051 | N/A     | N/A                                                           | 0.140 |
| 564305145 | NOL6    | nucleolar protein 6                                           | 0.142 |
| 564309116 | RTL6    | retrotransposon Gag like 6                                    | 0.142 |
| 444730664 | N/A     | N/A                                                           | 0.142 |
| 521031535 | N/A     | N/A                                                           | 0.142 |
| 164663868 | RGMA    | repulsive guidance molecule family member a                   | 0.143 |
| 119351041 | SYNRG   | synergin gamma                                                | 0.143 |
| 859916344 | N/A     | N/A                                                           | 0.143 |
| 431895484 | N/A     | N/A                                                           | 0.143 |
| 686735522 | N/A     | N/A                                                           | 0.143 |
| 564364568 | ARPP19  | cAMP regulated phosphoprotein 19                              | 0.144 |
| 148697875 | GDI1    | GDP dissociation inhibitor 1                                  | 0.144 |
| 564328896 | CHD2    | chromodomain helicase DNA binding protein 2                   | 0.145 |
| 672035558 | NOVA2   | NOVA alternative splicing regulator 2                         | 0.145 |
| 672068548 | SUPT6H  | SPT6 homolog, histone chaperone                               | 0.145 |
| 955507084 | N/A     | N/A                                                           | 0.145 |
| 514460070 | N/A     | N/A                                                           | 0.145 |
| 18959272  | KCNQ2   | potassium voltage-gated channel subfamily Q member 2          | 0.146 |
| 158081759 | PRKAR2B | protein kinase cAMP-dependent type II regulatory subunit beta | 0.146 |
| 880945834 | N/A     | N/A                                                           | 0.146 |

|           |                         |                                                                                                  |       |
|-----------|-------------------------|--------------------------------------------------------------------------------------------------|-------|
| 625274124 | N/A                     | N/A                                                                                              | 0.146 |
| 564331017 | Fbx119                  | F-box and leucine-rich repeat protein 19                                                         | 0.147 |
| 157820255 | MED13                   | mediator complex subunit 13                                                                      | 0.147 |
| 157817340 | Ube2l3                  | ubiquitin-conjugating enzyme E2L 3                                                               | 0.148 |
| 84781731  | ZDHHC3                  | zinc finger DHHC-type containing 3                                                               | 0.148 |
| 664746285 | N/A                     | N/A                                                                                              | 0.148 |
| 158341666 | SEL1L                   | SEL1L ERAD E3 ligase adaptor subunit                                                             | 0.149 |
| 970727843 | N/A                     | N/A                                                                                              | 0.149 |
| 589929864 | N/A                     | N/A                                                                                              | 0.149 |
| 28174920  | RPL17                   | ribosomal protein L17                                                                            | 0.151 |
| 240120166 | STRN4                   | striatin 4                                                                                       | 0.151 |
| 351698877 | N/A                     | N/A                                                                                              | 0.151 |
| 672075032 | MARK1                   | microtubule affinity regulating kinase 1                                                         | 0.152 |
| 829969914 | N/A                     | N/A                                                                                              | 0.152 |
| 664777237 | N/A                     | N/A                                                                                              | 0.152 |
| 23956194  | ARL8A                   | ADP ribosylation factor like GTPase 8A                                                           | 0.153 |
| 672050419 | SLC6A6                  | solute carrier family 6 member 6                                                                 | 0.153 |
| 68163407  | SAMD14                  | sterile alpha motif domain containing 14                                                         | 0.154 |
| 564373361 | SEZ6                    | seizure related 6 homolog                                                                        | 0.154 |
| 55741787  | STX7                    | syntaxin 7                                                                                       | 0.154 |
| 393716310 | WAC                     | WW domain containing adaptor with coiled-coil                                                    | 0.154 |
| 148688660 | FEZF2                   | FEZ family zinc finger 2                                                                         | 0.155 |
| 157819885 | SETD5                   | SET domain containing 5                                                                          | 0.155 |
| 403310688 | USP24                   | ubiquitin specific peptidase 24                                                                  | 0.155 |
| 821024661 | N/A                     | N/A                                                                                              | 0.155 |
| 672046732 | N/A                     | N/A                                                                                              | 0.155 |
| 51890219  | CCT5                    | chaperonin containing TCP1 subunit 5                                                             | 0.156 |
| 254281247 | EVL                     | Enah/Vasp-like                                                                                   | 0.156 |
| 300793740 | TANC2                   | tetratricopeptide repeat, ankyrin repeat and coiled-coil containing 2                            | 0.156 |
| 803119291 | N/A                     | N/A                                                                                              | 0.157 |
| 149047683 | N/A                     | N/A                                                                                              | 0.157 |
| 18266706  | IKBKAP                  | inhibitor of kappa light polypeptide gene enhancer in B-cells, kinase complex-associated protein | 0.158 |
| 33563266  | NDUFA4                  | NDUFA4, mitochondrial complex associated                                                         | 0.158 |
| 8394209   | Rpl29 (includes others) | ribosomal protein L29                                                                            | 0.158 |
| 884928897 | N/A                     | N/A                                                                                              | 0.158 |

|           |           |                                                                                |       |
|-----------|-----------|--------------------------------------------------------------------------------|-------|
| 157819223 | KIAA1324L | KIAA1324 like                                                                  | 0.159 |
| 28972173  | KIF3B     | kinesin family member 3B                                                       | 0.159 |
| 149033397 | DFNA5     | DFNA5, deafness associated tumor suppressor                                    | 0.160 |
| 148680533 | EIF5A     | eukaryotic translation initiation factor 5A                                    | 0.160 |
| 431921423 | N/A       | N/A                                                                            | 0.160 |
| 625206686 | N/A       | N/A                                                                            | 0.160 |
| 139947663 | NCDN      | neurochondrin                                                                  | 0.161 |
| 947231308 | N/A       | N/A                                                                            | 0.161 |
| 672082436 | N/A       | N/A                                                                            | 0.161 |
| 987959513 | N/A       | N/A                                                                            | 0.162 |
| 565318441 | N/A       | N/A                                                                            | 0.162 |
| 14010879  | PSMD1     | proteasome 26S subunit, non-ATPase 1                                           | 0.163 |
| 926689000 | N/A       | N/A                                                                            | 0.163 |
| 291049776 | IMPAD1    | inositol monophosphatase domain containing 1                                   | 0.164 |
| 12861758  | LY6H      | lymphocyte antigen 6 family member H                                           | 0.165 |
| 149016331 | NCL       | nucleolin                                                                      | 0.165 |
| 13928824  | YWHAE     | tyrosine 3-monooxygenase/tryptophan 5-monooxygenase activation protein epsilon | 0.165 |
| 281427141 | ZMIZ2     | zinc finger MIZ-type containing 2                                              | 0.165 |
| 402794806 | GARS      | glycyl-tRNA synthetase                                                         | 0.166 |
| 27465567  | HSBP1     | heat shock factor binding protein 1                                            | 0.166 |
| 60359978  | KIF3C     | kinesin family member 3C                                                       | 0.166 |
| 209447111 | PDZD4     | PDZ domain containing 4                                                        | 0.166 |
| 148696233 | TMEM127   | transmembrane protein 127                                                      | 0.166 |
| 564311321 | N/A       | N/A                                                                            | 0.166 |
| 568921780 | EIF4E     | eukaryotic translation initiation factor 4E                                    | 0.167 |
| 667481282 | N/A       | N/A                                                                            | 0.167 |
| 293651541 | LRRN2     | leucine rich repeat neuronal 2                                                 | 0.168 |
| 148666954 | RYBP      | RING1 and YY1 binding protein                                                  | 0.168 |
| 537127177 | N/A       | N/A                                                                            | 0.168 |
| 112983826 | KIAA0895L | KIAA0895 like                                                                  | 0.170 |
| 149056919 | SELENOW   | selenoprotein W                                                                | 0.170 |
| 655889416 | N/A       | N/A                                                                            | 0.170 |
| 795561827 | N/A       | N/A                                                                            | 0.170 |
| 9910214   | EIF5      | eukaryotic translation initiation factor 5                                     | 0.171 |
| 197245939 | HNRNPL    | heterogeneous nuclear ribonucleoprotein L                                      | 0.171 |
| 8394021   | PPP2CB    | protein phosphatase 2 catalytic subunit beta                                   | 0.171 |
| 8394432   | PRDX2     | peroxiredoxin 2                                                                | 0.171 |
| 568972243 | PRKAR1A   | protein kinase cAMP-dependent type I regulatory subunit alpha                  | 0.171 |



|           |           |                                                      |       |
|-----------|-----------|------------------------------------------------------|-------|
| 33636726  | SERINC1   | serine incorporator 1                                | 0.171 |
| 672067122 | N/A       | N/A                                                  | 0.171 |
| 149063095 | EIF4H     | eukaryotic translation initiation factor 4H          | 0.172 |
| 30851559  | MAPRE1    | microtubule associated protein RP/EB family member 1 | 0.172 |
| 293675    | SRSF2     | serine and arginine rich splicing factor 2           | 0.172 |
| 545215595 | N/A       | N/A                                                  | 0.172 |
| 26329593  | C11orf87  | chromosome 11 open reading frame 87                  | 0.173 |
| 171543899 | PLXNA4    | plexin A4                                            | 0.173 |
| 148692593 | PTGES3    | prostaglandin E synthase 3                           | 0.173 |
| 672050411 | RAB11FIP5 | RAB11 family interacting protein 5                   | 0.173 |
| 42476292  | TALDO1    | transaldolase 1                                      | 0.173 |
| 157819279 | TNPO3     | transportin 3                                        | 0.173 |
| 926685845 | N/A       | N/A                                                  | 0.173 |
| 635012684 | N/A       | N/A                                                  | 0.173 |
| 23271707  | EIF3B     | eukaryotic translation initiation factor 3 subunit B | 0.174 |
| 31560202  | TMEM246   | transmembrane protein 246                            | 0.174 |
| 13994121  | FEZ1      | fasciculation and elongation protein zeta 1          | 0.175 |
| 209870077 | TRIM28    | tripartite motif containing 28                       | 0.175 |
| 149046938 | N/A       | N/A                                                  | 0.175 |
| 284005558 | N/A       | N/A                                                  | 0.175 |
| 562821651 | N/A       | N/A                                                  | 0.175 |
| 76160821  | DNAJC18   | DnaJ heat shock protein family (Hsp40) member C18    | 0.176 |
| 148667025 | LHFPL4    | lipoma HMGIC fusion partner-like 4                   | 0.176 |
| 564358123 | MIDN      | midnolin                                             | 0.176 |
| 51948430  | NPDC1     | neural proliferation, differentiation and control 1  | 0.176 |
| 744598167 | N/A       | N/A                                                  | 0.176 |
| 22024394  | FABP5     | fatty acid binding protein 5                         | 0.177 |
| 564383487 | SLAIN2    | SLAIN motif family member 2                          | 0.177 |
| 655660415 | N/A       | N/A                                                  | 0.178 |
| 565318824 | N/A       | N/A                                                  | 0.178 |
| 564352364 | N/A       | N/A                                                  | 0.178 |
| 396080328 | ADCYAP1R1 | ADCYAP receptor type I                               | 0.179 |
| 755562682 | C11orf95  | chromosome 11 open reading frame 95                  | 0.179 |
| 13928922  | STX6      | syntaxin 6                                           | 0.179 |
| 293340917 | C3orf70   | chromosome 3 open reading frame 70                   | 0.180 |
| 148704795 | CFL2      | cofilin 2                                            | 0.180 |

|           |         |                                                                          |       |
|-----------|---------|--------------------------------------------------------------------------|-------|
| 26346731  | UBE2Z   | ubiquitin conjugating enzyme E2 Z                                        | 0.180 |
| 68341973  | WASF1   | WAS protein family member 1                                              | 0.180 |
| 611991798 | N/A     | N/A                                                                      | 0.180 |
| 594092878 | N/A     | N/A                                                                      | 0.180 |
| 158711738 | MICU2   | mitochondrial calcium uptake 2                                           | 0.181 |
| 564377243 | OPA1    | OPA1, mitochondrial dynamin like GTPase                                  | 0.181 |
| 965930210 | N/A     | N/A                                                                      | 0.181 |
| 16758036  | RPL21   | ribosomal protein L21                                                    | 0.182 |
| 67078426  | SPIN1   | spindlin 1                                                               | 0.182 |
| 40786451  | EIF2S2  | eukaryotic translation initiation factor 2 subunit beta                  | 0.183 |
| 149047559 | MTMR3   | myotubularin related protein 3                                           | 0.183 |
| 507693337 | N/A     | N/A                                                                      | 0.183 |
| 823419445 | N/A     | N/A                                                                      | 0.183 |
| 431899854 | N/A     | N/A                                                                      | 0.183 |
| 171846592 | GPBP1   | GC-rich promoter binding protein 1                                       | 0.184 |
| 149054120 | ORMDL3  | ORMDL sphingolipid biosynthesis regulator 3                              | 0.184 |
| 672054841 | RCC2    | regulator of chromosome condensation 2                                   | 0.184 |
| 767996256 | FBXL20  | F-box and leucine rich repeat protein 20                                 | 0.185 |
| 86477155  | PER1    | period circadian clock 1                                                 | 0.185 |
| 829944637 | N/A     | N/A                                                                      | 0.185 |
| 60360108  | BRD2    | bromodomain containing 2                                                 | 0.186 |
| 795270501 | N/A     | N/A                                                                      | 0.186 |
| 640823833 | N/A     | N/A                                                                      | 0.186 |
| 589927407 | N/A     | N/A                                                                      | 0.186 |
| 198278505 | RPL7    | ribosomal protein L7                                                     | 0.187 |
| 149069422 | RPL7L1  | ribosomal protein L7 like 1                                              | 0.187 |
| 924442952 | SPTBN2  | spectrin beta, non-erythrocytic 2                                        | 0.187 |
| 293343541 | ICE1    | interactor of little elongation complex ELL subunit 1                    | 0.188 |
| 16758782  | LMNB1   | lamin B1                                                                 | 0.188 |
| 820987686 | N/A     | N/A                                                                      | 0.188 |
| 148702333 | DDX42   | DEAD-box helicase 42                                                     | 0.189 |
| 148666026 | FAM49A  | family with sequence similarity 49 member A                              | 0.189 |
| 13591985  | MIF     | macrophage migration inhibitory factor (glycosylation-inhibiting factor) | 0.189 |
| 6753130   | NEUROD6 | neuronal differentiation 6                                               | 0.189 |
| 148708155 | N/A     | N/A                                                                      | 0.189 |
| 537141832 | N/A     | N/A                                                                      | 0.189 |
| 70794762  | HARS    | histidyl-tRNA synthetase                                                 | 0.190 |

|           |         |                                                                                                 |       |
|-----------|---------|-------------------------------------------------------------------------------------------------|-------|
| 50510427  | IP6K1   | inositol hexakisphosphate kinase 1                                                              | 0.190 |
| 149018452 | SMARCC1 | SWI/SNF related, matrix associated, actin dependent regulator of chromatin subfamily c member 1 | 0.190 |
| 859770113 | N/A     | N/A                                                                                             | 0.190 |
| 8393415   | GAP43   | growth associated protein 43                                                                    | 0.191 |
| 404501464 | IFNAR1  | interferon alpha and beta receptor subunit 1                                                    | 0.191 |
| 157823419 | PRAG1   | PEAK1 related kinase activating pseudokinase 1                                                  | 0.191 |
| 56550075  | PSMA7   | proteasome subunit alpha 7                                                                      | 0.191 |
| 157821581 | PSMD13  | proteasome 26S subunit, non-ATPase 13                                                           | 0.191 |
| 58865776  | TRIM32  | tripartite motif containing 32                                                                  | 0.191 |
| 148705826 | UCHL1   | ubiquitin C-terminal hydrolase L1                                                               | 0.191 |
| 823419836 | N/A     | N/A                                                                                             | 0.191 |
| 940716821 | N/A     | N/A                                                                                             | 0.191 |
| 564376494 | N/A     | N/A                                                                                             | 0.191 |
| 76008363  | BICD2   | BICD cargo adaptor 2                                                                            | 0.192 |
| 162287391 | RPL6    | ribosomal protein L6                                                                            | 0.192 |
| 674086663 | N/A     | N/A                                                                                             | 0.192 |
| 585638696 | N/A     | N/A                                                                                             | 0.192 |
| 270483894 | CAMSAP1 | calmodulin regulated spectrin associated protein 1                                              | 0.193 |
| 157818643 | KCTD3   | potassium channel tetramerization domain containing 3                                           | 0.193 |
| 16758298  | PSMB7   | proteasome subunit beta 7                                                                       | 0.193 |
| 564319816 | N/A     | N/A                                                                                             | 0.193 |
| 208973284 | MAP9    | microtubule associated protein 9                                                                | 0.194 |
| 564361208 | SCUBE1  | signal peptide, CUB domain and EGF like domain containing 1                                     | 0.194 |
| 795537196 | N/A     | N/A                                                                                             | 0.194 |
| 564367862 | Dst     | dystonin                                                                                        | 0.195 |
| 157817789 | DUSP8   | dual specificity phosphatase 8                                                                  | 0.195 |
| 564359050 | NUDT4   | nudix hydrolase 4                                                                               | 0.195 |
| 402743472 | SLC3A2  | solute carrier family 3 member 2                                                                | 0.195 |
| 18699726  | VPS4A   | vacuolar protein sorting 4 homolog A                                                            | 0.195 |
| 755785705 | N/A     | N/A                                                                                             | 0.195 |
| 440890867 | N/A     | N/A                                                                                             | 0.195 |
| 725571770 | N/A     | N/A                                                                                             | 0.195 |
| 148706791 | CELF3   | CUGBP Elav-like family member 3                                                                 | 0.196 |
| 672042487 | NBEA    | neurobeachin                                                                                    | 0.196 |

|           |          |                                                     |       |
|-----------|----------|-----------------------------------------------------|-------|
| 148682476 | PTP4A1   | protein tyrosine phosphatase type IVA, member 1     | 0.196 |
| 224451084 | GPSM1    | G protein signaling modulator 1                     | 0.197 |
| 157819591 | PARP6    | poly(ADP-ribose) polymerase family member 6         | 0.197 |
| 295789408 | N/A      | N/A                                                 | 0.197 |
| 77736544  | COX6A1   | cytochrome c oxidase subunit 6A1                    | 0.198 |
| 10720132  | NEO1     | neogenin 1                                          | 0.198 |
| 564398139 | FYN      | FYN proto-oncogene, Src family tyrosine kinase      | 0.199 |
| 564305239 | TMEM8B   | transmembrane protein 8B                            | 0.199 |
| 625183267 | N/A      | N/A                                                 | 0.199 |
| 444706073 | N/A      | N/A                                                 | 0.199 |
| 148675893 | LGALSL   | galectin like                                       | 0.200 |
| 119612238 | ZNF706   | zinc finger protein 706                             | 0.200 |
| 817328905 | N/A      | N/A                                                 | 0.200 |
| 677283307 | AZIN1    | antizyme inhibitor 1                                | 0.201 |
| 187960160 | BRSK1    | BR serine/threonine kinase 1                        | 0.201 |
| 109504669 | CDHR2    | cadherin related family member 2                    | 0.201 |
| 54400738  | CHPF     | chondroitin polymerizing factor                     | 0.201 |
| 672045157 | PRPF40A  | pre-mRNA processing factor 40 homolog A             | 0.201 |
| 672082389 | N/A      | N/A                                                 | 0.201 |
| 403263938 | N/A      | N/A                                                 | 0.201 |
| 26006223  | FBXO21   | F-box protein 21                                    | 0.202 |
| 84000579  | FTL      | ferritin light chain                                | 0.202 |
| 694879429 | ADGRL2   | adhesion G protein-coupled receptor L2              | 0.203 |
| 157823607 | ALDH18A1 | aldehyde dehydrogenase 18 family member A1          | 0.203 |
| 158186685 | RAB12    | RAB12, member RAS oncogene family                   | 0.203 |
| 795271913 | N/A      | N/A                                                 | 0.204 |
| 16758310  | LRP3     | LDL receptor related protein 3                      | 0.205 |
| 148689223 | MANF     | mesencephalic astrocyte derived neurotrophic factor | 0.205 |
| 197927410 | SETBP1   | SET binding protein 1                               | 0.205 |
| 13385526  | ZMYND19  | zinc finger MYND-type containing 19                 | 0.205 |
| 671001540 | N/A      | N/A                                                 | 0.205 |
| 564381466 | N/A      | N/A                                                 | 0.205 |
| 2852640   | ERI3     | ERI1 exoribonuclease family member 3                | 0.206 |
| 672044181 | HS2ST1   | heparan sulfate 2-O-sulfotransferase 1              | 0.206 |
| 281485586 | MAP3K7   | mitogen-activated protein kinase kinase kinase 7    | 0.206 |
| 11120704  | NOP58    | NOP58 ribonucleoprotein                             | 0.206 |

|           |           |                                                                      |       |
|-----------|-----------|----------------------------------------------------------------------|-------|
| 148664717 | PAIP2     | poly(A) binding protein interacting protein 2                        | 0.206 |
| 625258416 | N/A       | N/A                                                                  | 0.206 |
| 743729098 | N/A       | N/A                                                                  | 0.206 |
| 56549649  | NFIX      | nuclear factor I X                                                   | 0.207 |
| 655875254 | N/A       | N/A                                                                  | 0.207 |
| 966647643 | N/A       | N/A                                                                  | 0.207 |
| 148705576 | CRMP1     | collapsin response mediator protein 1                                | 0.208 |
| 213688408 | LINGO1    | leucine rich repeat and Ig domain containing 1                       | 0.208 |
| 157823005 | RAB11FIP4 | RAB11 family interacting protein 4                                   | 0.208 |
| 56605632  | RNMT      | RNA guanine-7 methyltransferase                                      | 0.208 |
| 12852725  | SPPL3     | signal peptide peptidase like 3                                      | 0.208 |
| 431917236 | N/A       | N/A                                                                  | 0.208 |
| 431917236 | N/A       | N/A                                                                  | 0.208 |
| 672015267 | N/A       | N/A                                                                  | 0.208 |
| 157823775 | PHC1      | polyhomeotic homolog 1                                               | 0.209 |
| 76096332  | SREBF2    | sterol regulatory element binding transcription factor 2             | 0.209 |
| 564386624 | AMER2     | APC membrane recruitment protein 2                                   | 0.210 |
| 158508473 | FAM69B    | family with sequence similarity 69 member B                          | 0.210 |
| 47059187  | GNL1      | G protein nucleolar 1 (putative)                                     | 0.210 |
| 253683473 | METTL9    | methyltransferase like 9                                             | 0.210 |
| 148707518 | RNF2      | ring finger protein 2                                                | 0.210 |
| 68533845  | UBE2E1    | ubiquitin conjugating enzyme E2 E1                                   | 0.210 |
| 33356154  | UBE2H     | ubiquitin conjugating enzyme E2 H                                    | 0.210 |
| 157820283 | NYAP1     | neuronal tyrosine phosphorylated phosphoinositide-3-kinase adaptor 1 | 0.211 |
| 29788994  | TMEM132A  | transmembrane protein 132A                                           | 0.211 |
| 332245592 | N/A       | N/A                                                                  | 0.211 |
| 672055149 | N/A       | N/A                                                                  | 0.211 |
| 926725899 | N/A       | N/A                                                                  | 0.211 |
| 491668487 | N/A       | N/A                                                                  | 0.212 |
| 149048659 | N/A       | N/A                                                                  | 0.212 |
| 58865604  | DIRC2     | disrupted in renal carcinoma 2                                       | 0.213 |
| 47155561  | DNAJC7    | DnaJ heat shock protein family (Hsp40) member C7                     | 0.213 |
| 762006019 | FAM8A1    | family with sequence similarity 8 member A1                          | 0.214 |
| 13507268  | MLLT3     | MLLT3, super elongation complex subunit                              | 0.214 |
| 926691741 | N/A       | N/A                                                                  | 0.214 |
| 55715816  | GLYR1     | glyoxylate reductase 1 homolog                                       | 0.215 |
| 58865976  | KLHDC3    | kelch domain containing 3                                            | 0.215 |

|           |         |                                                                   |       |
|-----------|---------|-------------------------------------------------------------------|-------|
| 188595675 | RFX7    | regulatory factor X7                                              | 0.215 |
| 672085227 | USP10   | ubiquitin specific peptidase 10                                   | 0.215 |
| 19344056  | MCRIP1  | MAPK regulated corepressor interacting protein 1                  | 0.216 |
| 189163477 | SCAF4   | SR-related CTD associated factor 4                                | 0.216 |
| 743742979 | N/A     | N/A                                                               | 0.216 |
| 672053690 | N/A     | N/A                                                               | 0.216 |
| 564393951 | MBD1    | methyl-CpG binding domain protein 1                               | 0.217 |
| 148707748 | NUCKS1  | nuclear casein kinase and cyclin dependent kinase substrate 1     | 0.217 |
| 58865512  | STRAP   | serine/threonine kinase receptor associated protein               | 0.217 |
| 157819739 | PODXL2  | podocalyxin like 2                                                | 0.218 |
| 955478861 | N/A     | N/A                                                               | 0.218 |
| 148670589 | RAB5C   | RAB5C, member RAS oncogene family                                 | 0.219 |
| 119628283 | TMEM57  | transmembrane protein 57                                          | 0.219 |
| 157822501 | MCM3AP  | minichromosome maintenance complex component 3 associated protein | 0.220 |
| 30017419  | NREP    | neuronal regeneration related protein                             | 0.220 |
| 8394405   | SLC7A5  | solute carrier family 7 member 5                                  | 0.220 |
| 25742623  | UGCG    | UDP-glucose ceramide glucosyltransferase                          | 0.220 |
| 2804296   | CDH8    | cadherin 8                                                        | 0.221 |
| 59709464  | PIK3R2  | phosphoinositide-3-kinase regulatory subunit 2                    | 0.221 |
| 655872066 | N/A     | N/A                                                               | 0.221 |
| 300798499 | AFF3    | AF4/FMR2 family member 3                                          | 0.222 |
| 54400718  | GHITM   | growth hormone inducible transmembrane protein                    | 0.222 |
| 67078422  | TMX1    | thioredoxin related transmembrane protein 1                       | 0.222 |
| 589941671 | N/A     | N/A                                                               | 0.222 |
| 157786926 | ARPC3   | actin related protein 2/3 complex subunit 3                       | 0.223 |
| 545490388 | ZMAT2   | zinc finger matrin-type 2                                         | 0.223 |
| 61556823  | RBM17   | RNA binding motif protein 17                                      | 0.224 |
| 148692189 | SAMD4B  | sterile alpha motif domain containing 4B                          | 0.224 |
| 61556748  | TSPYL1  | TSPY like 1                                                       | 0.224 |
| 586975096 | N/A     | N/A                                                               | 0.224 |
| 13540661  | BMPR1A  | bone morphogenetic protein receptor type 1A                       | 0.225 |
| 148674168 | DYNLRB1 | dynein light chain roadblock-type 1                               | 0.225 |
| 827475660 | EPC1    | enhancer of polycomb homolog 1                                    | 0.225 |
| 109150410 | SH3BP5  | SH3 domain binding protein 5                                      | 0.225 |
| 655698052 | N/A     | N/A                                                               | 0.225 |

|           |           |                                                       |       |
|-----------|-----------|-------------------------------------------------------|-------|
| 197927166 | AGPAT5    | 1-acylglycerol-3-phosphate O-acyltransferase 5        | 0.226 |
| 404312665 | DKK3      | dickkopf WNT signaling pathway inhibitor 3            | 0.226 |
| 56090568  | FBXO30    | F-box protein 30                                      | 0.226 |
| 21703344  | SAR1A     | secretion associated Ras related GTPase 1A            | 0.226 |
| 5870130   | SNRPB     | small nuclear ribonucleoprotein polypeptides B and B1 | 0.226 |
| 564315719 | N/A       | N/A                                                   | 0.226 |
| 83267872  | ADNP      | activity dependent neuroprotector homeobox            | 0.227 |
| 187469679 | LDB1      | LIM domain binding 1                                  | 0.227 |
| 21489987  | PCYOX1    | prenylcysteine oxidase 1                              | 0.227 |
| 640823357 | N/A       | N/A                                                   | 0.227 |
| 488534205 | N/A       | N/A                                                   | 0.227 |
| 672036872 | PRR12     | proline rich 12                                       | 0.228 |
| 8394221   | Rps3a1    | ribosomal protein S3A1                                | 0.228 |
| 403225023 | BRAP      | BRCA1 associated protein                              | 0.229 |
| 157822985 | CEBPZ     | CCAAT/enhancer binding protein zeta                   | 0.229 |
| 57164107  | NIPSNAP3A | nipsnap homolog 3A                                    | 0.229 |
| 755537448 | N/A       | N/A                                                   | 0.229 |
| 537145497 | N/A       | N/A                                                   | 0.229 |
| 189491871 | B3GAT3    | beta-1,3-glucuronyltransferase 3                      | 0.230 |
| 154426327 | KANSL2    | KAT8 regulatory NSL complex subunit 2                 | 0.230 |
| 42627759  | SMC3      | structural maintenance of chromosomes 3               | 0.230 |
| 300796772 | TMEM151B  | transmembrane protein 151B                            | 0.230 |
| 58865626  | UBXN4     | UBX domain protein 4                                  | 0.230 |
| 13928966  | HSF2      | heat shock transcription factor 2                     | 0.231 |
| 213688411 | LPCAT1    | lysophosphatidylcholine acyltransferase 1             | 0.231 |
| 537151504 | N/A       | N/A                                                   | 0.232 |
| 958756481 | N/A       | N/A                                                   | 0.232 |
| 277349626 | AATK      | apoptosis associated tyrosine kinase                  | 0.233 |
| 403224991 | MAP3K9    | mitogen-activated protein kinase kinase kinase 9      | 0.233 |
| 13929130  | SLC12A2   | solute carrier family 12 member 2                     | 0.233 |
| 11559976  | EXOC5     | exocyst complex component 5                           | 0.234 |
| 157817418 | NCK2      | NCK adaptor protein 2                                 | 0.234 |
| 521020666 | N/A       | N/A                                                   | 0.234 |
| 564386622 | AMER2     | APC membrane recruitment protein 2                    | 0.235 |
| 569000962 | CRIM1     | cysteine rich transmembrane BMP regulator 1           | 0.236 |
| 68341995  | NDUFS4    | NADH:ubiquinone oxidoreductase subunit S4             | 0.236 |
| 62079005  | SLAIN1    | SLAIN motif family member 1                           | 0.236 |
| 731286412 | N/A       | N/A                                                   | 0.236 |

|           |         |                                                           |       |
|-----------|---------|-----------------------------------------------------------|-------|
| 56540888  | ATG12   | autophagy related 12                                      | 0.237 |
| 392333349 | ELP3    | elongator acetyltransferase complex subunit 3             | 0.237 |
| 149044496 | PLAA    | phospholipase A2 activating protein                       | 0.237 |
| 71043834  | RBMX    | RNA binding motif protein, X-linked                       | 0.237 |
| 149024496 | SPEN    | spen family transcriptional repressor                     | 0.237 |
| 114051946 | YTHDF2  | YTH N6-methyladenosine RNA binding protein 2              | 0.237 |
| 27229298  | ELAVL3  | ELAV like RNA binding protein 3                           | 0.238 |
| 672041858 | PKIA    | cAMP-dependent protein kinase inhibitor alpha             | 0.238 |
| 28972780  | TLE3    | transducin like enhancer of split 3                       | 0.238 |
| 942047300 | N/A     | N/A                                                       | 0.238 |
| 60360118  | FAM168B | family with sequence similarity 168 member B              | 0.239 |
| 61557199  | HES6    | hes family bHLH transcription factor 6                    | 0.239 |
| 77415381  | PDAP1   | PDGFA associated protein 1                                | 0.239 |
| 401709959 | Ppp1cc  | protein phosphatase 1, catalytic subunit, gamma isoform   | 0.239 |
| 157787066 | SLC29A4 | solute carrier family 29 member 4                         | 0.239 |
| 674077614 | N/A     | N/A                                                       | 0.239 |
| 158138509 | DNAJC2  | DnaJ heat shock protein family (Hsp40) member C2          | 0.240 |
| 51036650  | MCL1    | MCL1, BCL2 family apoptosis regulator                     | 0.240 |
| 157817763 | NEK9    | NIMA related kinase 9                                     | 0.240 |
| 4506681   | RPS11   | ribosomal protein S11                                     | 0.240 |
| 66730335  | SUMO3   | small ubiquitin-like modifier 3                           | 0.240 |
| 29612542  | H2AFZ   | H2A histone family member Z                               | 0.241 |
| 157821927 | XPR1    | xenotropic and polytropic retrovirus receptor 1           | 0.241 |
| 85541051  | PDXP    | pyridoxal phosphatase                                     | 0.242 |
| 198442823 | PRCC    | papillary renal cell carcinoma (translocation-associated) | 0.242 |
| 641719431 | N/A     | N/A                                                       | 0.242 |
| 213417659 | KITLG   | KIT ligand                                                | 0.243 |
| 564380021 | TTC28   | tetratricopeptide repeat domain 28                        | 0.243 |
| 926714902 | N/A     | N/A                                                       | 0.243 |
| 443906726 | DLGAP3  | DLG associated protein 3                                  | 0.245 |
| 157823165 | DNAJB1  | DnaJ heat shock protein family (Hsp40) member B1          | 0.245 |
| 39850096  | RPS16   | ribosomal protein S16                                     | 0.245 |
| 6678315   | TSC22D1 | TSC22 domain family member 1                              | 0.245 |
| 187937028 | NDUFB9  | NADH:ubiquinone oxidoreductase subunit B9                 | 0.246 |
| 672069253 | SOCS7   | suppressor of cytokine signaling 7                        | 0.246 |



|           |           |                                                                     |       |
|-----------|-----------|---------------------------------------------------------------------|-------|
| 296491570 | N/A       | N/A                                                                 | 0.246 |
| 765099233 | LMNB2     | lamin B2                                                            | 0.247 |
| 281371452 | ORAI2     | ORAI calcium release-activated calcium modulator 2                  | 0.247 |
| 157820401 | ABHD2     | abhydrolase domain containing 2                                     | 0.248 |
| 148664543 | RNF138    | ring finger protein 138                                             | 0.249 |
| 823430370 | N/A       | N/A                                                                 | 0.249 |
| 18266682  | CDK5      | cyclin dependent kinase 5                                           | 0.250 |
| 13929008  | CLNS1A    | chloride nucleotide-sensitive channel 1A                            | 0.250 |
| 564345074 | N/A       | N/A                                                                 | 0.250 |
| 53850606  | IK        | IK cytokine, down-regulator of HLA II                               | 0.251 |
| 148696021 | N/A       | N/A                                                                 | 0.251 |
| 23263334  | LZTS1     | leucine zipper tumor suppressor 1                                   | 0.252 |
| 9507007   | PTGFRN    | prostaglandin F2 receptor inhibitor                                 | 0.252 |
| 676260928 | N/A       | N/A                                                                 | 0.252 |
| 28972574  | CDK19     | cyclin dependent kinase 19                                          | 0.253 |
| 157820509 | KCTD15    | potassium channel tetramerization domain containing 15              | 0.253 |
| 148707931 | RNF152    | ring finger protein 152                                             | 0.253 |
| 145558904 | EML1      | echinoderm microtubule associated protein like 1                    | 0.254 |
| 74216801  | RNF4      | ring finger protein 4                                               | 0.254 |
| 344245515 | N/A       | N/A                                                                 | 0.254 |
| 676272934 | N/A       | N/A                                                                 | 0.254 |
| 293343898 | EID2      | EP300 interacting inhibitor of differentiation 2                    | 0.255 |
| 404351673 | PPP1R21   | protein phosphatase 1 regulatory subunit 21                         | 0.255 |
| 821005859 | N/A       | N/A                                                                 | 0.255 |
| 594115840 | N/A       | N/A                                                                 | 0.255 |
| 293346096 | FAM171B   | family with sequence similarity 171 member B                        | 0.256 |
| 74147193  | HNRNPLL   | heterogeneous nuclear ribonucleoprotein L like                      | 0.256 |
| 884945546 | N/A       | N/A                                                                 | 0.256 |
| 9910378   | CDC42SE2  | CDC42 small effector 2                                              | 0.257 |
| 564384443 | EIF4ENIF1 | eukaryotic translation initiation factor 4E nuclear import factor 1 | 0.257 |
| 730529    | RPL13     | ribosomal protein L13                                               | 0.257 |
| 148709301 | SPOCK1    | SPARC/osteonectin, cwcv and kazal like domains proteoglycan 1       | 0.258 |
| 213511844 | ALG2      | ALG2, alpha-1,3/1,6-mannosyltransferase                             | 0.259 |
| 149038734 | EIF4EBP2  | eukaryotic translation initiation factor 4E binding protein 2       | 0.260 |

|           |          |                                                                  |       |
|-----------|----------|------------------------------------------------------------------|-------|
| 62543521  | FAM89B   | family with sequence similarity 89 member B                      | 0.260 |
| 55741780  | SPG21    | SPG21, maspardin                                                 | 0.260 |
| 344249173 | N/A      | N/A                                                              | 0.260 |
| 13242322  | ATF4     | activating transcription factor 4                                | 0.261 |
| 157822067 | BAP1     | BRCA1 associated protein 1                                       | 0.261 |
| 142375024 | CCDC92   | coiled-coil domain containing 92                                 | 0.261 |
| 149049279 | N/A      | N/A                                                              | 0.261 |
| 564399115 | N/A      | N/A                                                              | 0.261 |
| 802996718 | N/A      | N/A                                                              | 0.261 |
| 539937    | ARL14    | ADP ribosylation factor like GTPase 14                           | 0.262 |
| 388596656 | SLC4A1AP | solute carrier family 4 member 1 adaptor protein                 | 0.262 |
| 71361619  | BRX1     | BRX1, biogenesis of ribosomes                                    | 0.263 |
| 281371443 | CASTOR2  | cytosolic arginine sensor for mTORC1 subunit 2                   | 0.263 |
| 12004970  | RNF11    | ring finger protein 11                                           | 0.263 |
| 149018882 | N/A      | N/A                                                              | 0.263 |
| 148694630 | N/A      | N/A                                                              | 0.263 |
| 926702009 | N/A      | N/A                                                              | 0.263 |
| 149755772 | N/A      | N/A                                                              | 0.263 |
| 114052915 | CADM4    | cell adhesion molecule 4                                         | 0.264 |
| 564390601 | GPRIN1   | G protein regulated inducer of neurite outgrowth 1               | 0.264 |
| 201066397 | MPP6     | membrane palmitoylated protein 6                                 | 0.264 |
| 124487247 | PRICKLE2 | prickle planar cell polarity protein 2                           | 0.264 |
| 148672373 | N/A      | N/A                                                              | 0.264 |
| 408772026 | Afg3l1   | AFG3-like AAA ATPase 1                                           | 0.265 |
| 157822675 | FLRT2    | fibronectin leucine rich transmembrane protein 2                 | 0.265 |
| 189163475 | LRFN1    | leucine rich repeat and fibronectin type III domain containing 1 | 0.265 |
| 57527375  | THUMPD1  | THUMP domain containing 1                                        | 0.265 |
| 50511227  | ZBTB34   | zinc finger and BTB domain containing 34                         | 0.265 |
| 281332151 | ROBO2    | roundabout guidance receptor 2                                   | 0.266 |
| 397787574 | ST8SIA1  | ST8 alpha-N-acetyl-neuraminide alpha-2,8-sialyltransferase 1     | 0.266 |
| 672067124 | N/A      | N/A                                                              | 0.266 |
| 149018342 | DYNC1LI1 | dynein cytoplasmic 1 light intermediate chain 1                  | 0.267 |
| 167555101 | STRADB   | STE20-related kinase adaptor beta                                | 0.267 |
| 6981296   | NUP50    | nucleoporin 50                                                   | 0.268 |

|           |           |                                                                  |       |
|-----------|-----------|------------------------------------------------------------------|-------|
| 564368081 | REV1      | REV1, DNA directed polymerase                                    | 0.268 |
| 625263830 | N/A       | N/A                                                              | 0.268 |
| 582015198 | CRY2      | cryptochrome circadian clock 2                                   | 0.269 |
| 61556927  | EIF3G     | eukaryotic translation initiation factor 3 subunit G             | 0.269 |
| 157824087 | LRFN4     | leucine rich repeat and fibronectin type III domain containing 4 | 0.269 |
| 149028217 | SEMA6B    | semaphorin 6B                                                    | 0.269 |
| 148691289 | TUBB      | tubulin beta class I                                             | 0.269 |
| 568948348 | AKT1S1    | AKT1 substrate 1                                                 | 0.270 |
| 67078454  | SLC25A51  | solute carrier family 25 member 51                               | 0.270 |
| 148701223 | N/A       | N/A                                                              | 0.270 |
| 157073939 | LOC728392 | uncharacterized LOC728392                                        | 0.271 |
| 309319787 | OGFR      | opioid growth factor receptor                                    | 0.271 |
| 209863068 | SEMA7A    | semaphorin 7A (John Milton Hagen blood group)                    | 0.271 |
| 157820903 | BCL7C     | BCL tumor suppressor 7C                                          | 0.272 |
| 24586721  | EEF1B2    | eukaryotic translation elongation factor 1 beta 2                | 0.272 |
| 635137880 | N/A       | N/A                                                              | 0.272 |
| 6978787   | DYRK1A    | dual specificity tyrosine phosphorylation regulated kinase 1A    | 0.273 |
| 197386405 | FAM217B   | family with sequence similarity 217 member B                     | 0.273 |
| 21326451  | HMGAI     | high mobility group AT-hook 1                                    | 0.273 |
| 422398900 | CREBZF    | CREB/ATF bZIP transcription factor                               | 0.274 |
| 60360266  | PPP2R2A   | protein phosphatase 2 regulatory subunit Balpha                  | 0.274 |
| 164565387 | TBC1D14   | TBC1 domain family member 14                                     | 0.274 |
| 148705008 | N/A       | N/A                                                              | 0.274 |
| 537193756 | N/A       | N/A                                                              | 0.274 |
| 26337455  | HDGFL3    | HDGF like 3                                                      | 0.276 |
| 199560289 | REXO1     | RNA exonuclease 1 homolog                                        | 0.276 |
| 157817961 | PHF3      | PHD finger protein 3                                             | 0.277 |
| 148695032 | PSMD14    | proteasome 26S subunit, non-ATPase 14                            | 0.277 |
| 149047323 | ZNF518B   | zinc finger protein 518B                                         | 0.277 |
| 817271762 | N/A       | N/A                                                              | 0.277 |
| 759100021 | N/A       | N/A                                                              | 0.277 |
| 148687213 | COX19     | COX19, cytochrome c oxidase assembly factor                      | 0.278 |
| 672071367 | N/A       | N/A                                                              | 0.278 |
| 148710059 | TRIM8     | tripartite motif containing 8                                    | 0.279 |
| 829979052 | N/A       | N/A                                                              | 0.279 |

|           |           |                                                                  |       |
|-----------|-----------|------------------------------------------------------------------|-------|
| 71680975  | Akap17a   | A-kinase anchoring protein 17A                                   | 0.280 |
| 392333339 | FAM124A   | family with sequence similarity 124 member A                     | 0.280 |
| 157819153 | IRF2BP1   | interferon regulatory factor 2 binding protein 1                 | 0.280 |
| 154759279 | MARCH9    | membrane associated ring-CH-type finger 9                        | 0.280 |
| 157819369 | LRFN3     | leucine rich repeat and fibronectin type III domain containing 3 | 0.281 |
| 817476911 | PSMB4     | proteasome subunit beta 4                                        | 0.281 |
| 149047261 | QDPR      | quinoid dihydropteridine reductase                               | 0.281 |
| 16758158  | UFD1      | ubiquitin recognition factor in ER associated degradation 1      | 0.281 |
| 532003341 | N/A       | N/A                                                              | 0.281 |
| 672062795 | N/A       | N/A                                                              | 0.281 |
| 35068     | NME1      | NME/NM23 nucleoside diphosphate kinase 1                         | 0.282 |
| 28174943  | RPL24     | ribosomal protein L24                                            | 0.282 |
| 189491614 | SLC25A46  | solute carrier family 25 member 46                               | 0.282 |
| 655832893 | N/A       | N/A                                                              | 0.282 |
| 109505188 | FAM208B   | family with sequence similarity 208 member B                     | 0.283 |
| 6981010   | Hba1/Hba2 | hemoglobin, alpha 1                                              | 0.283 |
| 70794797  | USP3      | ubiquitin specific peptidase 3                                   | 0.283 |
| 564329567 | Vbp1      | VHL binding protein 1                                            | 0.283 |
| 14010889  | RPS6KB1   | ribosomal protein S6 kinase B1                                   | 0.284 |
| 672040089 | N/A       | N/A                                                              | 0.284 |
| 188595725 | C11orf57  | chromosome 11 open reading frame 57                              | 0.285 |
| 6753384   | CDK5R1    | cyclin dependent kinase 5 regulatory subunit 1                   | 0.285 |
| 40018540  | DDX24     | DEAD-box helicase 24                                             | 0.285 |
| 149064951 | DYNC1I1   | dynein cytoplasmic 1 intermediate chain 1                        | 0.285 |
| 46485444  | NOP53     | NOP53 ribosome biogenesis factor                                 | 0.285 |
| 61889068  | MXI1      | MAX interactor 1, dimerization protein                           | 0.286 |
| 564311072 | TNFAIP8L1 | TNF alpha induced protein 8 like 1                               | 0.286 |
| 488510613 | N/A       | N/A                                                              | 0.286 |
| 149036010 | COPE      | coatomer protein complex subunit epsilon                         | 0.287 |
| 157821079 | ITPA      | inosine triphosphatase                                           | 0.287 |
| 50510855  | RIMKLB    | ribosomal modification protein rimK like family member B         | 0.287 |
| 77797839  | UBXN1     | UBX domain protein 1                                             | 0.287 |
| 149037637 | N/A       | N/A                                                              | 0.287 |
| 847038810 | N/A       | N/A                                                              | 0.287 |
| 60499029  | SET       | SET nuclear proto-oncogene                                       | 0.288 |
| 25453384  | SLC30A4   | solute carrier family 30 member 4                                | 0.288 |
| 537222089 | N/A       | N/A                                                              | 0.288 |

|           |         |                                                        |       |
|-----------|---------|--------------------------------------------------------|-------|
| 119569672 | BUB3    | BUB3, mitotic checkpoint protein                       | 0.289 |
| 47059500  | NSG1    | neuron specific gene family member 1                   | 0.290 |
| 61557316  | ST3GAL1 | ST3 beta-galactoside alpha-2,3-sialyltransferase 1     | 0.290 |
| 672026875 | N/A     | N/A                                                    | 0.290 |
| 918611848 | N/A     | N/A                                                    | 0.291 |
| 931568103 | N/A     | N/A                                                    | 0.292 |
| 584088128 | N/A     | N/A                                                    | 0.292 |
| 60360548  | DTX1    | deltex E3 ubiquitin ligase 1                           | 0.293 |
| 148747146 | PPP2R2D | protein phosphatase 2 regulatory subunit Bdelta        | 0.293 |
| 293346766 | TCAF1   | TRPM8 channel associated factor 1                      | 0.293 |
| 926688833 | N/A     | N/A                                                    | 0.294 |
| 958720315 | N/A     | N/A                                                    | 0.294 |
| 625204821 | N/A     | N/A                                                    | 0.294 |
| 157823551 | MAP1S   | microtubule associated protein 1S                      | 0.295 |
| 77695933  | NELL2   | neural EGFL like 2                                     | 0.295 |
| 114145515 | Pkn3    | protein kinase N3                                      | 0.295 |
| 310616720 | DHX37   | DEAH-box helicase 37                                   | 0.296 |
| 281427149 | FAM69A  | family with sequence similarity 69 member A            | 0.296 |
| 13929168  | FAT1    | FAT atypical cadherin 1                                | 0.296 |
| 2920825   | RPS2    | ribosomal protein S2                                   | 0.296 |
| 148670791 | ZFYVE1  | zinc finger FYVE-type containing 1                     | 0.296 |
| 157824174 | HIGD2A  | HIG1 hypoxia inducible domain family member 2A         | 0.297 |
| 157822151 | ERH     | enhancer of rudimentary homolog (Drosophila)           | 0.298 |
| 672026416 | PRR36   | proline rich 36                                        | 0.298 |
| 149067653 | N/A     | N/A                                                    | 0.298 |
| 564340181 | SETX    | senataxin                                              | 0.299 |
| 157278004 | SOBP    | sine oculis binding protein homolog                    | 0.299 |
| 23097350  | TOMM20  | translocase of outer mitochondrial membrane 20         | 0.299 |
| 672064354 | FOXP4   | forkhead box P4                                        | 0.300 |
| 448824835 | Mff     | mitochondrial fission factor                           | 0.300 |
| 197382256 | PHF12   | PHD finger protein 12                                  | 0.300 |
| 16758316  | PIP4K2B | phosphatidylinositol-5-phosphate 4-kinase type 2 beta  | 0.300 |
| 21914829  | PDCD4   | programmed cell death 4                                | 0.302 |
| 148697614 | MAF1    | MAF1 homolog, negative regulator of RNA polymerase III | 0.303 |
| 564367958 | SEMA4C  | semaphorin 4C                                          | 0.304 |

|           |              |                                                                              |       |
|-----------|--------------|------------------------------------------------------------------------------|-------|
| 672082323 | N/A          | N/A                                                                          | 0.304 |
| 157822433 | EID1         | EP300 interacting inhibitor of differentiation 1                             | 0.305 |
| 76362828  | TEF          | TEF, PAR bZIP transcription factor                                           | 0.305 |
| 47155567  | ARHGAP20     | Rho GTPase activating protein 20                                             | 0.307 |
| 148679797 | DEF8         | differentially expressed in FDCP 8 homolog                                   | 0.307 |
| 293347435 | PTPRD        | protein tyrosine phosphatase, receptor type D                                | 0.307 |
| 987939967 | N/A          | N/A                                                                          | 0.307 |
| 672013322 | LOC103689966 | MARCKS-related protein-like                                                  | 0.308 |
| 395627633 | PCP4         | Purkinje cell protein 4                                                      | 0.308 |
| 395824794 | N/A          | N/A                                                                          | 0.308 |
| 564394038 | CTDP1        | CTD phosphatase subunit 1                                                    | 0.309 |
| 156139120 | NTS          | neurotensin                                                                  | 0.309 |
| 148682320 | PCMTD1       | protein-L-isoaspartate (D-aspartate) O-methyltransferase domain containing 1 | 0.309 |
| 593735187 | N/A          | N/A                                                                          | 0.309 |
| 149057945 | DUSP4        | dual specificity phosphatase 4                                               | 0.310 |
| 34877176  | GPRIN2       | G protein regulated inducer of neurite outgrowth 2                           | 0.310 |
| 564340133 | GTF3C4       | general transcription factor IIIC subunit 4                                  | 0.310 |
| 149067325 | TDG          | thymine DNA glycosylase                                                      | 0.310 |
| 26350839  | AP3S2        | adaptor related protein complex 3 sigma 2 subunit                            | 0.311 |
| 6978613   | CCK          | cholecystokinin                                                              | 0.311 |
| 187282055 | ZNF579       | zinc finger protein 579                                                      | 0.311 |
| 149037114 | GNG10        | G protein subunit gamma 10                                                   | 0.312 |
| 55926145  | NME2         | NME/NM23 nucleoside diphosphate kinase 2                                     | 0.312 |
| 998662027 | N/A          | N/A                                                                          | 0.312 |
| 511848456 | N/A          | N/A                                                                          | 0.312 |
| 425384    | CAMK4        | calcium/calmodulin dependent protein kinase IV                               | 0.313 |
| 199561799 | LRP12        | LDL receptor related protein 12                                              | 0.313 |
| 157823125 | MRPS30       | mitochondrial ribosomal protein S30                                          | 0.313 |
| 62078927  | CDV3         | CDV3 homolog                                                                 | 0.314 |
| 940782404 | N/A          | N/A                                                                          | 0.314 |
| 327358533 | N/A          | N/A                                                                          | 0.315 |
| 127138710 | HNRNPD       | heterogeneous nuclear ribonucleoprotein D                                    | 0.316 |
| 24233544  | SBK1         | SH3 domain binding kinase 1                                                  | 0.316 |
| 187937036 | ZC3HC1       | zinc finger C3HC-type containing 1                                           | 0.316 |
| 300796515 | DPY19L1      | dpy-19 like 1                                                                | 0.317 |
| 28212232  | GNL3         | G protein nucleolar 3                                                        | 0.317 |

|           |               |                                                                               |       |
|-----------|---------------|-------------------------------------------------------------------------------|-------|
| 402692348 | LRRC4B        | leucine rich repeat containing 4B                                             | 0.317 |
| 56090552  | GTF2F1        | general transcription factor IIF subunit 1                                    | 0.318 |
| 27229055  | HYPK          | huntingtin interacting protein K                                              | 0.318 |
| 110624761 | YIPF5         | Yip1 domain family member 5                                                   | 0.318 |
| 221040576 | MPPED1        | metallophosphoesterase domain containing 1                                    | 0.319 |
| 157819315 | OSBPL11       | oxysterol binding protein like 11                                             | 0.319 |
| 672043577 | Rprd2         | regulation of nuclear pre-mRNA domain containing 2                            | 0.319 |
| 148700264 | SH3RF3        | SH3 domain containing ring finger 3                                           | 0.319 |
| 207318    | TMSB10/TMSB4X | thymosin beta 4, X-linked                                                     | 0.319 |
| 47058994  | ATP5L         | ATP synthase, H <sup>+</sup> transporting, mitochondrial Fo complex subunit G | 0.320 |
| 62244083  | PDRG1         | p53 and DNA damage regulated 1                                                | 0.321 |
| 564384353 | SH3BP2        | SH3 domain binding protein 2                                                  | 0.321 |
| 60359940  | SYT4          | synaptotagmin 4                                                               | 0.321 |
| 300798476 | THAP12        | THAP domain containing 12                                                     | 0.321 |
| 157823667 | UTP15         | UTP15, small subunit processome component                                     | 0.321 |
| 755472674 | N/A           | N/A                                                                           | 0.321 |
| 157786600 | RNF145        | ring finger protein 145                                                       | 0.322 |
| 61557082  | TERF2IP       | TERF2 interacting protein                                                     | 0.323 |
| 189491869 | KCMF1         | potassium channel modulatory factor 1                                         | 0.325 |
| 149066670 | TMEM5         | transmembrane protein 5                                                       | 0.325 |
| 148704849 | N/A           | N/A                                                                           | 0.325 |
| 431916930 | N/A           | N/A                                                                           | 0.325 |
| 564363346 | BCL9L         | B-cell CLL/lymphoma 9 like                                                    | 0.326 |
| 564394925 | PAPD5         | poly(A) RNA polymerase D5, non-canonical                                      | 0.326 |
| 564377500 | N/A           | N/A                                                                           | 0.326 |
| 72004267  | AKIRIN1       | akirin 1                                                                      | 0.327 |
| 15079262  | SPNS2         | sphingolipid transporter 2                                                    | 0.327 |
| 795445199 | N/A           | N/A                                                                           | 0.327 |
| 148697042 | N/A           | N/A                                                                           | 0.327 |
| 3513451   | ALG10         | ALG10, alpha-1,2-glucosyltransferase                                          | 0.328 |
| 564332092 | CARS          | cysteinyl-tRNA synthetase                                                     | 0.328 |
| 672028116 | TAPT1         | transmembrane anterior posterior transformation 1                             | 0.329 |
| 66730525  | LRRC73        | leucine rich repeat containing 73                                             | 0.330 |
| 149064983 | N/A           | N/A                                                                           | 0.330 |
| 639869    | CHKA          | choline kinase alpha                                                          | 0.331 |
| 157787068 | GRM3          | glutamate metabotropic receptor 3                                             | 0.331 |

|           |                        |                                                   |       |
|-----------|------------------------|---------------------------------------------------|-------|
| 74195796  | Ptma (includes others) | prothymosin alpha                                 | 0.331 |
| 564394180 | SALL3                  | spalt like transcription factor 3                 | 0.332 |
| 281604121 | C11orf58               | chromosome 11 open reading frame 58               | 0.333 |
| 140971918 | Hnrnpab                | heterogeneous nuclear ribonucleoprotein A/B       | 0.334 |
| 61556795  | IGFBP7                 | insulin like growth factor binding protein 7      | 0.334 |
| 537238017 | N/A                    | N/A                                               | 0.334 |
| 564315672 | CLASP1                 | cytoplasmic linker associated protein 1           | 0.336 |
| 59709429  | ZSCAN21                | zinc finger and SCAN domain containing 21         | 0.337 |
| 672026667 | CUX1                   | cut like homeobox 1                               | 0.338 |
| 50510655  | PCF11                  | PCF11 cleavage and polyadenylation factor subunit | 0.338 |
| 568970985 | MBTD1                  | mbt domain containing 1                           | 0.339 |
| 210147441 | ATXN7L3B               | ataxin 7 like 3B                                  | 0.340 |
| 672069572 | KANSL1                 | KAT8 regulatory NSL complex subunit 1             | 0.340 |
| 564298767 | N/A                    | N/A                                               | 0.340 |
| 197252056 | MED1                   | mediator complex subunit 1                        | 0.341 |
| 157822663 | RAB22A                 | RAB22A, member RAS oncogene family                | 0.341 |
| 157822643 | RPF2                   | ribosome production factor 2 homolog              | 0.341 |
| 149063191 | STX2                   | syntaxin 2                                        | 0.341 |
| 725566074 | N/A                    | N/A                                               | 0.341 |
| 148675659 | CSDE1                  | cold shock domain containing E1                   | 0.342 |
| 81907791  | SVOP                   | SV2 related protein                               | 0.342 |
| 157819919 | TRAF4                  | TNF receptor associated factor 4                  | 0.342 |
| 2252816   | AXIN1                  | axin 1                                            | 0.343 |
| 58865962  | RNF41                  | ring finger protein 41                            | 0.343 |
| 51491900  | TOR1A                  | torsin family 1 member A                          | 0.343 |
| 189491666 | DDA1                   | DET1 and DDB1 associated 1                        | 0.344 |
| 20806137  | DDX46                  | DEAD-box helicase 46                              | 0.344 |
| 821013078 | N/A                    | N/A                                               | 0.344 |
| 568983220 | PAPD7                  | poly(A) RNA polymerase D7, non-canonical          | 0.345 |
| 672028764 | ENOX1                  | ecto-NOX disulfide-thiol exchanger 1              | 0.346 |
| 157818841 | POGZ                   | pogo transposable element derived with ZNF domain | 0.346 |
| 162417967 | IER5                   | immediate early response 5                        | 0.347 |
| 14277700  | RPS12                  | ribosomal protein S12                             | 0.348 |
| 13786132  | Acot1                  | acyl-CoA thioesterase 1                           | 0.349 |
| 68534262  | C1orf43                | chromosome 1 open reading frame 43                | 0.349 |
| 564325373 | PRR18                  | proline rich 18                                   | 0.349 |
| 9506421   | BACE1                  | beta-secretase 1                                  | 0.350 |



|           |               |                                                       |       |
|-----------|---------------|-------------------------------------------------------|-------|
| 70794766  | MRPS25        | mitochondrial ribosomal protein S25                   | 0.350 |
| 157819257 | Ubxn7         | UBX domain protein 7                                  | 0.350 |
| 119616373 | MEF2C         | myocyte enhancer factor 2C                            | 0.351 |
| 169234953 | SELENOH       | selenoprotein H                                       | 0.351 |
| 24025618  | DAB1          | DAB1, reelin adaptor protein                          | 0.352 |
| 149056919 | SELENOW       | selenoprotein W                                       | 0.352 |
| 291042683 | DCAF5         | DDB1 and CUL4 associated factor 5                     | 0.353 |
| 57527466  | DCUN1D5       | defective in cullin neddylation 1 domain containing 5 | 0.353 |
| 62078455  | PTRH2         | peptidyl-tRNA hydrolase 2                             | 0.353 |
| 574584811 | TUBB4A        | tubulin beta 4A class IVa                             | 0.353 |
| 392343448 | KLHL13        | kelch like family member 13                           | 0.354 |
| 148707696 | Snrpe         | small nuclear ribonucleoprotein E                     | 0.354 |
| 149044118 | WDR20         | WD repeat domain 20                                   | 0.355 |
| 672085484 | Rhou          | ras homolog family member U                           | 0.356 |
| 357588462 | BCCIP         | BRCA2 and CDKN1A interacting protein                  | 0.358 |
| 149047360 | N/A           | N/A                                                   | 0.358 |
| 160333089 | MAZ           | MYC associated zinc finger protein                    | 0.359 |
| 8393823   | Nefm          | neurofilament, medium polypeptide                     | 0.359 |
| 677444634 | N/A           | N/A                                                   | 0.359 |
| 119603586 | THAP11        | THAP domain containing 11                             | 0.360 |
| 85701722  | RPRML         | reprimo like                                          | 0.361 |
| 157823413 | THOC3         | THO complex 3                                         | 0.361 |
| 157787107 | CCNG2         | cyclin G2                                             | 0.362 |
| 109791    | CLPS          | colipase                                              | 0.363 |
| 157822835 | IGFBPL1       | insulin like growth factor binding protein like 1     | 0.363 |
| 300793780 | ZNF251        | zinc finger protein 251                               | 0.363 |
| 537229315 | N/A           | N/A                                                   | 0.364 |
| 148673911 | Gm21596/Hmgb1 | high mobility group box 1                             | 0.366 |
| 157817121 | TCTE1         | t-complex-associated-testis-expressed 1               | 0.367 |
| 149031601 | Hist1h1c      | histone cluster 1 H1 family member c                  | 0.368 |
| 156627555 | NT5C3B        | 5'-nucleotidase, cytosolic IIIB                       | 0.368 |
| 149064973 | ASNS          | asparagine synthetase (glutamine-hydrolyzing)         | 0.369 |
| 56606102  | BAG5          | BCL2 associated athanogene 5                          | 0.369 |
| 157824132 | TTC9B         | tetratricopeptide repeat domain 9B                    | 0.369 |
| 109490297 | ABCA3         | ATP binding cassette subfamily A member 3             | 0.370 |
| 564308639 | N/A           | N/A                                                   | 0.370 |
| 405113035 | E2F4          | E2F transcription factor 4                            | 0.371 |
| 157819221 | NAA30         | N(alpha)-acetyltransferase 30, NatC catalytic subunit | 0.371 |

|           |             |                                                                         |       |
|-----------|-------------|-------------------------------------------------------------------------|-------|
| 440907053 | N/A         | N/A                                                                     | 0.372 |
| 17985949  | HBB         | hemoglobin subunit beta                                                 | 0.373 |
| 281427139 | TADA2B      | transcriptional adaptor 2B                                              | 0.373 |
| 672014573 | N/A         | N/A                                                                     | 0.373 |
| 149044005 | N/A         | N/A                                                                     | 0.373 |
| 564333920 | PPRC1       | peroxisome proliferator-activated receptor gamma, coactivator-related 1 | 0.374 |
| 158517832 | SEC61G      | Sec61 translocon gamma subunit                                          | 0.374 |
| 77917554  | SLC39A9     | solute carrier family 39 member 9                                       | 0.374 |
| 564343121 | SMOX        | spermine oxidase                                                        | 0.374 |
| 564323057 | ARMCX4      | armadillo repeat containing, X-linked 4                                 | 0.375 |
| 37359818  | KCTD5       | potassium channel tetramerization domain containing 5                   | 0.376 |
| 537237916 | N/A         | N/A                                                                     | 0.376 |
| 157823465 | CHSY1       | chondroitin sulfate synthase 1                                          | 0.377 |
| 71361655  | MRPL12      | mitochondrial ribosomal protein L12                                     | 0.377 |
| 40789237  | PCDHA4      | protocadherin alpha 4                                                   | 0.377 |
| 55741514  | TSEN34      | tRNA splicing endonuclease subunit 34                                   | 0.377 |
| 672028599 | SACS        | sacsin molecular chaperone                                              | 0.378 |
| 564300780 | TRIM33      | tripartite motif containing 33                                          | 0.378 |
| 548456234 | N/A         | N/A                                                                     | 0.378 |
| 594042682 | N/A         | N/A                                                                     | 0.380 |
| 392306987 | N/A         | N/A                                                                     | 0.380 |
| 62945326  | FAM220A     | family with sequence similarity 220 member A                            | 0.382 |
| 12847552  | H3F3A/H3F3B | H3 histone family member 3A                                             | 0.383 |
| 312596922 | MRPL52      | mitochondrial ribosomal protein L52                                     | 0.383 |
| 57164019  | B4GALT3     | beta-1,4-galactosyltransferase 3                                        | 0.384 |
| 157818273 | CDC42EP4    | CDC42 effector protein 4                                                | 0.385 |
| 157821097 | MRPL3       | mitochondrial ribosomal protein L3                                      | 0.385 |
| 524964924 | N/A         | N/A                                                                     | 0.385 |
| 112180619 | YPEL3       | yippee like 3                                                           | 0.386 |
| 564300505 | SH3D19      | SH3 domain containing 19                                                | 0.387 |
| 197246116 | PINK1       | PTEN induced putative kinase 1                                          | 0.388 |
| 149045006 | N/A         | N/A                                                                     | 0.388 |
| 340805866 | ADRA2A      | adrenoceptor alpha 2A                                                   | 0.389 |
| 142976617 | SEPHS2      | selenophosphate synthetase 2                                            | 0.389 |
| 672036551 | ZDHHC13     | zinc finger DHHC-type containing 13                                     | 0.389 |
| 404312698 | CASC4       | cancer susceptibility 4                                                 | 0.390 |
| 62078827  | CTDSPL2     | CTD small phosphatase like 2                                            | 0.390 |
| 60678292  | Hba1/Hba2   | hemoglobin, alpha 1                                                     | 0.390 |

|           |          |                                                             |       |
|-----------|----------|-------------------------------------------------------------|-------|
| 149023303 | MRPS26   | mitochondrial ribosomal protein S26                         | 0.390 |
| 584277018 | NR1D2    | nuclear receptor subfamily 1 group D member 2               | 0.390 |
| 355557615 | N/A      | N/A                                                         | 0.390 |
| 203278    | CLTA     | clathrin light chain A                                      | 0.391 |
| 157822431 | FJX1     | four jointed box 1                                          | 0.391 |
| 564299234 | Lcor     | ligand dependent nuclear receptor corepressor               | 0.392 |
| 634895400 | N/A      | N/A                                                         | 0.392 |
| 48976087  | TFB1M    | transcription factor B1, mitochondrial                      | 0.393 |
| 149043402 | N/A      | N/A                                                         | 0.393 |
| 157819969 | CTU1     | cytosolic thiouridylase subunit 1                           | 0.396 |
| 564317718 | Ktn1     | kinectin 1                                                  | 0.396 |
| 6981302   | ODC1     | ornithine decarboxylase 1                                   | 0.396 |
| 58865996  | TRIM13   | tripartite motif containing 13                              | 0.397 |
| 625246380 | N/A      | N/A                                                         | 0.400 |
| 880805457 | GPR161   | G protein-coupled receptor 161                              | 0.402 |
| 58865998  | PCDHGB7  | protocadherin gamma subfamily B, 7                          | 0.403 |
| 157820771 | ZNRF2    | zinc and ring finger 2                                      | 0.403 |
| 148702008 | N/A      | N/A                                                         | 0.403 |
| 59937915  | ARIH2    | ariadne RBR E3 ubiquitin protein ligase 2                   | 0.404 |
| 141803183 | ZKSCAN3  | zinc finger with KRAB and SCAN domains 3                    | 0.404 |
| 946774489 | N/A      | N/A                                                         | 0.404 |
| 281371427 | NRIP1    | nuclear receptor interacting protein 1                      | 0.405 |
| 71043628  | OGFRL1   | opioid growth factor receptor like 1                        | 0.405 |
| 74220037  | FAM107B  | family with sequence similarity 107 member B                | 0.406 |
| 392351637 | FAM171A2 | family with sequence similarity 171 member A2               | 0.406 |
| 157821997 | MED28    | mediator complex subunit 28                                 | 0.406 |
| 201066403 | TGIF2    | TGFB induced factor homeobox 2                              | 0.406 |
| 112984540 | FCF1     | FCF1 rRNA-processing protein                                | 0.407 |
| 795155982 | N/A      | N/A                                                         | 0.407 |
| 148676796 | N/A      | N/A                                                         | 0.407 |
| 564363988 | ISLR2    | immunoglobulin superfamily containing leucine rich repeat 2 | 0.408 |
| 82617653  | PCDHGA12 | protocadherin gamma subfamily A, 12                         | 0.409 |
| 820987686 | N/A      | N/A                                                         | 0.409 |
| 564357258 | CCDC85C  | coiled-coil domain containing 85C                           | 0.410 |
| 198278471 | ZBED4    | zinc finger BED-type containing 4                           | 0.410 |
| 724928464 | N/A      | N/A                                                         | 0.410 |
| 17933496  | TMEM158  | transmembrane protein 158 (gene/pseudogene)                 | 0.411 |
| 672050972 | N/A      | N/A                                                         | 0.411 |
| 672084101 | N/A      | N/A                                                         | 0.412 |

|           |            |                                                                        |       |
|-----------|------------|------------------------------------------------------------------------|-------|
| 157822027 | CSRNP2     | cysteine and serine rich nuclear protein 2                             | 0.413 |
| 149058345 | N/A        | N/A                                                                    | 0.414 |
| 19424250  | CST6       | cystatin E/M                                                           | 0.415 |
| 148672336 | N/A        | N/A                                                                    | 0.415 |
| 149047844 | LYPD6      | LY6/PLAUR domain containing 6                                          | 0.416 |
| 8923415   | MARCH5     | membrane associated ring-CH-type finger 5                              | 0.416 |
| 157817720 | SLC16A14   | solute carrier family 16 member 14                                     | 0.416 |
| 300797828 | KAT14      | lysine acetyltransferase 14                                            | 0.417 |
| 585689575 | N/A        | N/A                                                                    | 0.417 |
| 564378247 | CCZ1/CCZ1B | CCZ1 homolog B, vacuolar protein trafficking and biogenesis associated | 0.418 |
| 704532863 | N/A        | N/A                                                                    | 0.418 |
| 56090485  | M6PR       | mannose-6-phosphate receptor, cation dependent                         | 0.419 |
| 564395313 | OTUD4      | OTU deubiquitinase 4                                                   | 0.419 |
| 109480728 | TMEM74     | transmembrane protein 74                                               | 0.419 |
| 109480728 | TMEM74     | transmembrane protein 74                                               | 0.419 |
| 161621245 | ABT1       | activator of basal transcription 1                                     | 0.420 |
| 157820119 | LRRTM1     | leucine rich repeat transmembrane neuronal 1                           | 0.420 |
| 537238000 | N/A        | N/A                                                                    | 0.421 |
| 157821267 | RFC5       | replication factor C subunit 5                                         | 0.422 |
| 537211362 | N/A        | N/A                                                                    | 0.422 |
| 564357463 | KIF26A     | kinesin family member 26A                                              | 0.423 |
| 50511183  | TMEM200A   | transmembrane protein 200A                                             | 0.423 |
| 359324332 | N/A        | N/A                                                                    | 0.423 |
| 148700102 | SIRT1      | sirtuin 1                                                              | 0.424 |
| 189011649 | NUDT16     | nudix hydrolase 16                                                     | 0.425 |
| 33086594  | SAT1       | spermidine/spermine N1-acetyltransferase 1                             | 0.425 |
| 226693321 | FKBP11     | FK506 binding protein 11                                               | 0.426 |
| 672059756 | N/A        | N/A                                                                    | 0.426 |
| 157819927 | SNRPB2     | small nuclear ribonucleoprotein polypeptide B2                         | 0.427 |
| 8394196   | NTM        | neurotrimin                                                            | 0.428 |
| 148673748 | FAM110B    | family with sequence similarity 110 member B                           | 0.429 |
| 157819717 | NIPA2      | non imprinted in Prader-Willi/Angelman syndrome 2                      | 0.429 |
| 76096328  | COMMD9     | COMM domain containing 9                                               | 0.430 |
| 635102874 | N/A        | N/A                                                                    | 0.430 |
| 61557236  | RAD23A     | RAD23 homolog A, nucleotide excision repair protein                    | 0.431 |
| 148709746 | N/A        | N/A                                                                    | 0.432 |

|           |               |                                                                          |       |
|-----------|---------------|--------------------------------------------------------------------------|-------|
| 77917610  | GPBP1L1       | GC-rich promoter binding protein 1 like 1                                | 0.434 |
| 18426862  | PSMD9         | proteasome 26S subunit, non-ATPase 9                                     | 0.435 |
| 157822367 | PUS3          | pseudouridylate synthase 3                                               | 0.435 |
| 109467956 | PPP1R26       | protein phosphatase 1 regulatory subunit 26                              | 0.436 |
| 564379881 | PGAM5         | PGAM family member 5, mitochondrial serine/threonine protein phosphatase | 0.437 |
| 223555981 | UBE2QL1       | ubiquitin conjugating enzyme E2 Q family like 1                          | 0.437 |
| 21450249  | C9orf78       | chromosome 9 open reading frame 78                                       | 0.438 |
| 6680007   | GJC1          | gap junction protein gamma 1                                             | 0.438 |
| 157823823 | CCNJ          | cyclin J                                                                 | 0.439 |
| 109475418 | FOXO6         | forkhead box O6                                                          | 0.441 |
| 149058952 | MEF2C         | myocyte enhancer factor 2C                                               | 0.441 |
| 672028080 | PRR14L        | proline rich 14 like                                                     | 0.441 |
| 157823369 | TERF2         | telomeric repeat binding factor 2                                        | 0.442 |
| 148687364 | Cux1          | cut-like homeobox 1                                                      | 0.443 |
| 58865880  | TBRG4         | transforming growth factor beta regulator 4                              | 0.443 |
| 564311452 | TMEM131       | transmembrane protein 131                                                | 0.444 |
| 635108195 | N/A           | N/A                                                                      | 0.444 |
| 672073189 | N/A           | N/A                                                                      | 0.444 |
| 672017116 | N/A           | N/A                                                                      | 0.445 |
| 564345076 | N/A           | N/A                                                                      | 0.445 |
| 157819301 | ZNF777        | zinc finger protein 777                                                  | 0.446 |
| 26351105  | MDK           | midkine (neurite growth-promoting factor 2)                              | 0.448 |
| 157821747 | MDM2          | MDM2 proto-oncogene                                                      | 0.448 |
| 149016584 | ZNF606        | zinc finger protein 606                                                  | 0.448 |
| 672026129 | LRCH3         | leucine rich repeats and calponin homology domain containing 3           | 0.449 |
| 157817845 | KMT5B         | lysine methyltransferase 5B                                              | 0.450 |
| 40789241  | PCDHA3        | protocadherin alpha 3                                                    | 0.450 |
| 564384243 | Gm1673        | predicted gene 1673                                                      | 0.451 |
| 392350322 | DNAJC13       | DnaJ heat shock protein family (Hsp40) member C13                        | 0.452 |
| 143359181 | PQLC1         | PQ loop repeat containing 1                                              | 0.452 |
| 402794103 | ATG101        | autophagy related 101                                                    | 0.453 |
| 11559958  | SYT6          | synaptotagmin 6                                                          | 0.453 |
| 564338846 | INTS12        | integrator complex subunit 12                                            | 0.454 |
| 31543340  | NR4A2         | nuclear receptor subfamily 4 group A member 2                            | 0.456 |
| 672053062 | FKBP15        | FK506 binding protein 15                                                 | 0.458 |
| 349501022 | 2410002F23Rik | RIKEN cDNA 2410002F23 gene                                               | 0.460 |

|           |               |                                                        |       |
|-----------|---------------|--------------------------------------------------------|-------|
| 817273101 | N/A           | N/A                                                    | 0.460 |
| 62647770  | H1FX          | H1 histone family member X                             | 0.461 |
| 672044124 | N/A           | N/A                                                    | 0.462 |
| 158186787 | TK1           | thymidine kinase 1                                     | 0.463 |
| 149031942 | N/A           | N/A                                                    | 0.465 |
| 568941586 | IQSEC1        | IQ motif and Sec7 domain 1                             | 0.466 |
| 564316286 | CNST          | consortin, connexin sorting protein                    | 0.467 |
| 3212116   | PFDN2         | prefoldin subunit 2                                    | 0.467 |
| 112421036 | POU3F3        | POU class 3 homeobox 3                                 | 0.467 |
| 564351113 | N/A           | N/A                                                    | 0.467 |
| 51095128  | LINC00998     | long intergenic non-protein coding RNA 998             | 0.468 |
| 675706491 | N/A           | N/A                                                    | 0.468 |
| 564365330 | CDC25A        | cell division cycle 25A                                | 0.469 |
| 148681067 | VASH2         | vasohibin 2                                            | 0.469 |
| 189011636 | ATRAID        | all-trans retinoic acid induced differentiation factor | 0.471 |
| 84000579  | FTL           | ferritin light chain                                   | 0.472 |
| 564320789 | SEH1L         | SEH1 like nucleoporin                                  | 0.472 |
| 149052692 | N/A           | N/A                                                    | 0.472 |
| 164565364 | ITPKB         | inositol-trisphosphate 3-kinase B                      | 0.473 |
| 300795203 | HS6ST2        | heparan sulfate 6-O-sulfotransferase 2                 | 0.474 |
| 148679437 | HAS3          | hyaluronan synthase 3                                  | 0.475 |
| 157822691 | NTSR1         | neurotensin receptor 1                                 | 0.475 |
| 30024612  | SOX11         | SRY-box 11                                             | 0.476 |
| 440909886 | N/A           | N/A                                                    | 0.476 |
| 30017415  | ITPKC         | inositol-trisphosphate 3-kinase C                      | 0.480 |
| 803269187 | N/A           | N/A                                                    | 0.482 |
| 884926991 | N/A           | N/A                                                    | 0.482 |
| 564362348 | Fam76b        | family with sequence similarity 76, member B           | 0.484 |
| 564335688 | TRIO          | trio Rho guanine nucleotide exchange factor            | 0.485 |
| 18875392  | RFXAP         | regulatory factor X associated protein                 | 0.486 |
| 528768520 | N/A           | N/A                                                    | 0.486 |
| 148673911 | Gm21596/Hmgb1 | high mobility group box 1                              | 0.487 |
| 157822475 | NGDN          | neuroguidin                                            | 0.488 |
| 109478211 | TOGARAM1      | TOG array regulator of axonemal microtubules 1         | 0.489 |
| 725568549 | N/A           | N/A                                                    | 0.490 |
| 56090445  | PHOSPHO2      | phosphatase, orphan 2                                  | 0.491 |
| 254028164 | NGRN          | neugrin, neurite outgrowth associated                  | 0.494 |
| 157824124 | NUAK1         | NUAK family kinase 1                                   | 0.494 |

|           |          |                                                                   |       |
|-----------|----------|-------------------------------------------------------------------|-------|
| 151554393 | SIAH1    | siah E3 ubiquitin protein ligase 1                                | 0.497 |
| 431911718 | N/A      | N/A                                                               | 0.497 |
| 300794118 | MN1      | MN1 proto-oncogene, transcriptional regulator                     | 0.498 |
| 403310686 | SOX4     | SRY-box 4                                                         | 0.500 |
| 965920370 | N/A      | N/A                                                               | 0.503 |
| 795170747 | N/A      | N/A                                                               | 0.503 |
| 73990974  | LZTS3    | leucine zipper tumor suppressor family member 3                   | 0.504 |
| 56605644  | TFB2M    | transcription factor B2, mitochondrial                            | 0.509 |
| 149066158 | ZNF623   | zinc finger protein 623                                           | 0.509 |
| 880913460 | N/A      | N/A                                                               | 0.509 |
| 13928942  | PER2     | period circadian clock 2                                          | 0.513 |
| 392354145 | HNRNPA0  | heterogeneous nuclear ribonucleoprotein A0                        | 0.515 |
| 157786766 | RFC4     | replication factor C subunit 4                                    | 0.515 |
| 544442375 | N/A      | N/A                                                               | 0.516 |
| 403043582 | SOCS6    | suppressor of cytokine signaling 6                                | 0.517 |
| 34328151  | TBR1     | T-box, brain 1                                                    | 0.518 |
| 29789082  | COIL     | coilin                                                            | 0.519 |
| 51948492  | NUDT19   | nudix hydrolase 19                                                | 0.519 |
| 62078923  | DZIP1L   | DAZ interacting zinc finger protein 1 like                        | 0.521 |
| 672080026 | N/A      | N/A                                                               | 0.522 |
| 62078729  | CDKN2AIP | CDKN2A interacting protein                                        | 0.523 |
| 17530969  | SLC8A3   | solute carrier family 8 member A3                                 | 0.523 |
| 157819731 | PRR7     | proline rich 7, synaptic                                          | 0.526 |
| 564315812 | NAV1     | neuron navigator 1                                                | 0.527 |
| 672047353 | RALGAPA2 | Ral GTPase activating protein catalytic alpha subunit 2           | 0.527 |
| 392331954 | KANSL1   | KAT8 regulatory NSL complex subunit 1                             | 0.529 |
| 149064803 | NHLRC3   | NHL repeat containing 3                                           | 0.530 |
| 74143776  | INIP     | INTS3 and NABP interacting protein                                | 0.531 |
| 25453400  | CDH6     | cadherin 6                                                        | 0.532 |
| 238859603 | ISLR2    | immunoglobulin superfamily containing leucine rich repeat 2       | 0.532 |
| 672080115 | TENM3    | teneurin transmembrane protein 3                                  | 0.533 |
| 213385295 | Ppp2r3d  | protein phosphatase 2 (formerly 2A), regulatory subunit B", delta | 0.534 |
| 564314663 | VPS8     | VPS8, CORVET complex subunit                                      | 0.535 |
| 238859603 | ISLR2    | immunoglobulin superfamily containing leucine rich repeat 2       | 0.537 |
| 404501518 | ZNF569   | zinc finger protein 569                                           | 0.537 |

|           |              |                                                                      |       |
|-----------|--------------|----------------------------------------------------------------------|-------|
| 537166446 | N/A          | N/A                                                                  | 0.539 |
| 157820017 | FBXO33       | F-box protein 33                                                     | 0.542 |
| 197381846 | PP2D1        | protein phosphatase 2C like domain containing 1                      | 0.542 |
| 676284727 | N/A          | N/A                                                                  | 0.543 |
| 655889411 | N/A          | N/A                                                                  | 0.543 |
| 56090289  | PELO         | pelota homolog (Drosophila)                                          | 0.545 |
| 564389552 | LOC100910854 | zinc finger MYND domain-containing protein 19-like                   | 0.547 |
| 3800869   | PIM3         | Pim-3 proto-oncogene, serine/threonine kinase                        | 0.548 |
| 537191098 | N/A          | N/A                                                                  | 0.548 |
| 157818339 | ZBTB33       | zinc finger and BTB domain containing 33                             | 0.549 |
| 564333892 | WNT8B        | Wnt family member 8B                                                 | 0.550 |
| 982264581 | N/A          | N/A                                                                  | 0.552 |
| 672085486 | EGLN1        | egl-9 family hypoxia inducible factor 1                              | 0.556 |
| 149029231 | LOC100365289 | rCG57257-like                                                        | 0.556 |
| 148706598 | PKDCC        | protein kinase domain containing, cytoplasmic                        | 0.558 |
| 149064065 | ZMYM5        | zinc finger MYM-type containing 5                                    | 0.558 |
| 67078426  | SPIN1        | spindlin 1                                                           | 0.560 |
| 293348129 | DACT1        | dishevelled binding antagonist of beta catenin 1                     | 0.561 |
| 158186659 | CBS/CBSL     | cystathionine-beta-synthase                                          | 0.562 |
| 564307173 | HEATR5A      | HEAT repeat containing 5A                                            | 0.565 |
| 564318054 | R3hcc1       | R3H domain and coiled-coil containing 1                              | 0.565 |
| 51980294  | COQ3         | coenzyme Q3, methyltransferase                                       | 0.566 |
| 955485868 | N/A          | N/A                                                                  | 0.566 |
| 148670774 | N/A          | N/A                                                                  | 0.566 |
| 201066401 | RCOR3        | REST corepressor 3                                                   | 0.567 |
| 28972099  | RUBCN        | RUN and cysteine rich domain containing beclin 1 interacting protein | 0.567 |
| 149026477 | N/A          | N/A                                                                  | 0.571 |
| 83642816  | APOPT1       | apoptogenic 1, mitochondrial                                         | 0.573 |
| 293351303 | METTL22      | methyltransferase like 22                                            | 0.573 |
| 21703842  | RTCB         | RNA 2',3'-cyclic phosphate and 5'-OH ligase                          | 0.574 |
| 30017421  | SLA          | Src like adaptor                                                     | 0.575 |
| 564303955 | EMX1         | empty spiracles homeobox 1                                           | 0.577 |
| 803119291 | N/A          | N/A                                                                  | 0.582 |
| 148704240 | ZMYM2        | zinc finger MYM-type containing 2                                    | 0.584 |
| 564317927 | SACS         | sacsin molecular chaperone                                           | 0.585 |
| 672072796 | N/A          | N/A                                                                  | 0.585 |
| 18376839  | DDIT4        | DNA damage inducible transcript 4                                    | 0.588 |



|           |         |                                                             |       |
|-----------|---------|-------------------------------------------------------------|-------|
| 3676248   | Prim1   | primase (DNA) subunit 1                                     | 0.589 |
| 564316243 | CEP170  | centrosomal protein 170                                     | 0.590 |
| 149046410 | ARHGEF4 | Rho guanine nucleotide exchange factor 4                    | 0.591 |
| 281604129 | HELQ    | helicase, POLQ-like                                         | 0.591 |
| 672057962 | N/A     | N/A                                                         | 0.591 |
| 564310188 | IGDCC4  | immunoglobulin superfamily DCC subclass member 4            | 0.593 |
| 672053428 | LRP8    | LDL receptor related protein 8                              | 0.593 |
| 884914541 | N/A     | N/A                                                         | 0.593 |
| 7949105   | PBX3    | PBX homeobox 3                                              | 0.594 |
| 564382848 | Hnrnpdl | heterogeneous nuclear ribonucleoprotein D-like              | 0.595 |
| 226371633 | CABLES1 | Cdk5 and Abl enzyme substrate 1                             | 0.596 |
| 2341056   | SOX12   | SRY-box 12                                                  | 0.597 |
| 157822893 | IMP3    | IMP3, U3 small nucleolar ribonucleoprotein                  | 0.598 |
| 392349170 | ZFP36L2 | ZFP36 ring finger protein like 2                            | 0.599 |
| 123405    | POU3F1  | POU class 3 homeobox 1                                      | 0.604 |
| 392345518 | SENP5   | SUMO1/sentrin specific peptidase 5                          | 0.608 |
| 157818733 | ZBTB2   | zinc finger and BTB domain containing 2                     | 0.609 |
| 406362836 | HS6ST3  | heparan sulfate 6-O-sulfotransferase 3                      | 0.610 |
| 399154114 | KPNA2   | karyopherin subunit alpha 2                                 | 0.612 |
| 109467956 | PPP1R26 | protein phosphatase 1 regulatory subunit 26                 | 0.613 |
| 672046728 | N/A     | N/A                                                         | 0.613 |
| 444741673 | CYHR1   | cysteine and histidine rich 1                               | 0.614 |
| 564378170 | PAN3    | PAN3 poly(A) specific ribonuclease subunit                  | 0.614 |
| 672026767 | N/A     | N/A                                                         | 0.615 |
| 395504625 | N/A     | N/A                                                         | 0.615 |
| 149059246 | N/A     | N/A                                                         | 0.616 |
| 219879771 | PGAP3   | post-GPI attachment to proteins 3                           | 0.619 |
| 524940250 | N/A     | N/A                                                         | 0.619 |
| 37360398  | ISLR2   | immunoglobulin superfamily containing leucine rich repeat 2 | 0.623 |
| 564397086 | BRPF3   | bromodomain and PHD finger containing 3                     | 0.629 |
| 672078059 | N/A     | N/A                                                         | 0.630 |
| 157819193 | DOK5    | docking protein 5                                           | 0.631 |
| 157823891 | ING2    | inhibitor of growth family member 2                         | 0.633 |
| 694978694 | N/A     | N/A                                                         | 0.633 |
| 16758574  | CNTN5   | contactin 5                                                 | 0.636 |
| 564396111 | ZCCHC14 | zinc finger CCHC-type containing 14                         | 0.636 |
| 149018731 | TMEM108 | transmembrane protein 108                                   | 0.643 |
| 564393060 | N/A     | N/A                                                         | 0.644 |

|           |         |                                                               |       |
|-----------|---------|---------------------------------------------------------------|-------|
| 20302045  | JUND    | JunD proto-oncogene, AP-1 transcription factor subunit        | 0.646 |
| 157820217 | Gsta4   | glutathione S-transferase, alpha 4                            | 0.647 |
| 149035005 | IQCE    | IQ motif containing E                                         | 0.654 |
| 77627740  | ING3    | inhibitor of growth family member 3                           | 0.655 |
| 11560065  | GPR85   | G protein-coupled receptor 85                                 | 0.656 |
| 399154114 | KPNA2   | karyopherin subunit alpha 2                                   | 0.656 |
| 672018099 | N/A     | N/A                                                           | 0.657 |
| 124486586 | AUTS2   | AUTS2, activator of transcription and developmental regulator | 0.660 |
| 524983306 | N/A     | N/A                                                           | 0.660 |
| 293348214 | CCDC88C | coiled-coil domain containing 88C                             | 0.665 |
| 148704682 | N/A     | N/A                                                           | 0.675 |
| 674054416 | N/A     | N/A                                                           | 0.683 |
| 300796169 | SP8     | Sp8 transcription factor                                      | 0.684 |
| 564313508 | BPTF    | bromodomain PHD finger transcription factor                   | 0.685 |
| 567316240 | CEBPA   | CCAAT/enhancer binding protein alpha                          | 0.686 |
| 672022427 | ZNF740  | zinc finger protein 740                                       | 0.687 |
| 625253043 | N/A     | N/A                                                           | 0.690 |
| 884945546 | N/A     | N/A                                                           | 0.697 |
| 66730382  | TRNT1   | tRNA nucleotidyl transferase 1                                | 0.698 |
| 568920164 | TAF4    | TATA-box binding protein associated factor 4                  | 0.703 |
| 189011634 | ARMC7   | armadillo repeat containing 7                                 | 0.705 |
| 149024753 | DFFB    | DNA fragmentation factor subunit beta                         | 0.705 |
| 302595867 | Trim11  | tripartite motif-containing 11                                | 0.707 |
| 564352668 | MYCL    | MYCL proto-oncogene, bHLH transcription factor                | 0.713 |
| 149042171 | RTL5    | retrotransposon Gag like 5                                    | 0.713 |
| 149036607 | N/A     | N/A                                                           | 0.713 |
| 157822359 | PELI2   | pellino E3 ubiquitin protein ligase family member 2           | 0.717 |
| 564377502 | EIF4G1  | eukaryotic translation initiation factor 4 gamma 1            | 0.722 |
| 39104628  | SORBS1  | sorbin and SH3 domain containing 1                            | 0.725 |
| 555290059 | MED7    | mediator complex subunit 7                                    | 0.728 |
| 149052692 | N/A     | N/A                                                           | 0.728 |
| 197386066 | ZNF784  | zinc finger protein 784                                       | 0.729 |
| 149045812 | EXOSC3  | exosome component 3                                           | 0.730 |
| 672029117 | N/A     | N/A                                                           | 0.732 |

|           |           |                                                                                |       |
|-----------|-----------|--------------------------------------------------------------------------------|-------|
| 149034092 | Grid1     | glutamate ionotropic receptor delta type subunit 1                             | 0.740 |
| 672019522 | N/A       | N/A                                                                            | 0.740 |
| 300797222 | ANKRD13C  | ankyrin repeat domain 13C                                                      | 0.741 |
| 672088045 | N/A       | N/A                                                                            | 0.745 |
| 820980553 | N/A       | N/A                                                                            | 0.747 |
| 564347830 | ZXDC      | ZXD family zinc finger C                                                       | 0.748 |
| 697023347 | N/A       | N/A                                                                            | 0.749 |
| 672060362 | ELFN2     | extracellular leucine rich repeat and fibronectin type III domain containing 2 | 0.751 |
| 348041347 | CENPL     | centromere protein L                                                           | 0.752 |
| 148692940 | WAPL      | WAPL cohesin release factor                                                    | 0.752 |
| 918577634 | N/A       | N/A                                                                            | 0.752 |
| 149056503 | Zfp60     | zinc finger protein 60                                                         | 0.757 |
| 80861398  | CRY1      | cryptochrome circadian clock 1                                                 | 0.761 |
| 148702781 | N/A       | N/A                                                                            | 0.764 |
| 564313637 | CDR2L     | cerebellar degeneration related protein 2 like                                 | 0.769 |
| 755566692 | HUWE1     | HECT, UBA and WWE domain containing 1, E3 ubiquitin protein ligase             | 0.776 |
| 149044808 | PUS10     | pseudouridylate synthase 10                                                    | 0.777 |
| 149034959 | ZNF12     | zinc finger protein 12                                                         | 0.777 |
| 431916930 | N/A       | N/A                                                                            | 0.777 |
| 672031975 | LOC299312 | similar to G protein-binding protein CRFG                                      | 0.779 |
| 564303928 | TET3      | tet methylcytosine dioxygenase 3                                               | 0.780 |
| 149048609 | N/A       | N/A                                                                            | 0.780 |
| 12831217  | GPR27     | G protein-coupled receptor 27                                                  | 0.781 |
| 564329918 | EMSY      | EMSY, BRCA2 interacting transcriptional repressor                              | 0.785 |
| 149047683 | N/A       | N/A                                                                            | 0.790 |
| 149044121 | N/A       | N/A                                                                            | 0.791 |
| 672025117 | MBTD1     | mbt domain containing 1                                                        | 0.796 |
| 586908220 | ARHGAP44  | Rho GTPase activating protein 44                                               | 0.797 |
| 672019438 | FKBP15    | FK506 binding protein 15                                                       | 0.798 |
| 958720315 | N/A       | N/A                                                                            | 0.799 |
| 672022661 | N/A       | N/A                                                                            | 0.805 |
| 672086880 | N/A       | N/A                                                                            | 0.811 |
| 564372912 | GPS2      | G protein pathway suppressor 2                                                 | 0.816 |
| 392337738 | LYSMD4    | LysM domain containing 4                                                       | 0.819 |
| 568907669 | NYAP2     | neuronal tyrosine-phosphorylated phosphoinositide-3-kinase adaptor 2           | 0.820 |

|           |           |                                                     |       |
|-----------|-----------|-----------------------------------------------------|-------|
| 392354293 | Hmgb3     | high mobility group box 3                           | 0.821 |
| 564321169 | CHD9      | chromodomain helicase DNA binding protein 9         | 0.822 |
| 20376822  | PROKR1    | prokineticin receptor 1                             | 0.825 |
| 568926543 | KIAA0368  | KIAA0368                                            | 0.830 |
| 149016587 | N/A       | N/A                                                 | 0.832 |
| 148682476 | PTP4A1    | protein tyrosine phosphatase type IVA, member 1     | 0.836 |
| 564306696 | SRBD1     | S1 RNA binding domain 1                             | 0.837 |
| 731286412 | N/A       | N/A                                                 | 0.840 |
| 564322442 | Kdm6a     | lysine demethylase 6A                               | 0.842 |
| 109460021 | KIAA2026  | KIAA2026                                            | 0.846 |
| 392346263 | TTL11     | tubulin tyrosine ligase like 11                     | 0.849 |
| 564315667 | CLASP1    | cytoplasmic linker associated protein 1             | 0.851 |
| 149018731 | TMEM108   | transmembrane protein 108                           | 0.852 |
| 564352950 | N/A       | N/A                                                 | 0.857 |
| 149025186 | RPS6KL1   | ribosomal protein S6 kinase like 1                  | 0.858 |
| 293342200 | DGKH      | diacylglycerol kinase eta                           | 0.860 |
| 392339263 | PKP4      | plakophilin 4                                       | 0.861 |
| 672026785 | N/A       | N/A                                                 | 0.862 |
| 672026702 | N/A       | N/A                                                 | 0.865 |
| 392339806 | CFAP69    | cilia and flagella associated protein 69            | 0.866 |
| 112984092 | RPRM      | reprimin, TP53 dependent G2 arrest mediator homolog | 0.867 |
| 197386527 | LYPD6B    | LY6/PLAUR domain containing 6B                      | 0.876 |
| 537271325 | N/A       | N/A                                                 | 0.880 |
| 293339965 | RAB11FIP3 | RAB11 family interacting protein 3                  | 0.890 |
| 675649807 | N/A       | N/A                                                 | 0.890 |
| 685536628 | N/A       | N/A                                                 | 0.893 |
| 149058726 | N/A       | N/A                                                 | 0.895 |
| 672087260 | N/A       | N/A                                                 | 0.896 |
| 564312944 | KIAA0753  | KIAA0753                                            | 0.903 |
| 568992323 | CSMD3     | CUB and Sushi multiple domains 3                    | 0.912 |
| 568929584 | TRIM62    | tripartite motif containing 62                      | 0.916 |
| 149024681 | N/A       | N/A                                                 | 0.920 |
| 568979800 | NPAS3     | neuronal PAS domain protein 3                       | 0.926 |
| 293353154 | TBC1D1    | TBC1 domain family member 1                         | 0.928 |
| 564298336 | RBBP6     | RB binding protein 6, ubiquitin ligase              | 0.934 |
| 68063179  | N/A       | N/A                                                 | 0.946 |
| 741943159 | OTX1      | orthodenticle homeobox 1                            | 0.947 |
| 109472884 | UBE3C     | ubiquitin protein ligase E3C                        | 0.950 |

|           |          |                                                                                                 |       |
|-----------|----------|-------------------------------------------------------------------------------------------------|-------|
| 410515422 | NTN1     | netrin 1                                                                                        | 0.956 |
| 6679423   | POU3F2   | POU class 3 homeobox 2                                                                          | 0.956 |
| 157818769 | NSL1     | NSL1, MIS12 kinetochore complex component                                                       | 0.958 |
| 149025130 | Fam161b  | family with sequence similarity 161, member B                                                   | 0.969 |
| 564310195 | ANKDD1A  | ankyrin repeat and death domain containing 1A                                                   | 0.979 |
| 564297387 | Zfp658   | zinc finger protein 658                                                                         | 0.982 |
| 564329920 | EMSY     | EMSY, BRCA2 interacting transcriptional repressor                                               | 0.991 |
| 564316247 | CEP170   | centrosomal protein 170                                                                         | 1.000 |
| 26329649  | IER5L    | immediate early response 5 like                                                                 | 1.005 |
| 149025439 | DICER1   | dicer 1, ribonuclease III                                                                       | 1.008 |
| 148705473 | FAM53A   | family with sequence similarity 53 member A                                                     | 1.008 |
| 148705043 | RRM2     | ribonucleotide reductase regulatory subunit M2                                                  | 1.012 |
| 672086719 | FAM184A  | family with sequence similarity 184 member A                                                    | 1.013 |
| 293346251 | TMEM62   | transmembrane protein 62                                                                        | 1.013 |
| 564309098 | EFCAB6   | EF-hand calcium binding domain 6                                                                | 1.014 |
| 148701660 | FSTL4    | follistatin like 4                                                                              | 1.015 |
| 564307783 | TECPR2   | tectonin beta-propeller repeat containing 2                                                     | 1.019 |
| 564341299 | N/A      | N/A                                                                                             | 1.020 |
| 564307241 | MIA2     | melanoma inhibitory activity 2                                                                  | 1.021 |
| 6978894   | GIPR     | gastric inhibitory polypeptide receptor                                                         | 1.026 |
| 672029702 | ZCCHC6   | zinc finger CCHC-type containing 6                                                              | 1.027 |
| 672082610 | N/A      | N/A                                                                                             | 1.030 |
| 564298041 | GDPD5    | glycerophosphodiester phosphodiesterase domain containing 5                                     | 1.031 |
| 672012920 | N/A      | N/A                                                                                             | 1.034 |
| 752423229 | N/A      | N/A                                                                                             | 1.034 |
| 109480102 | SMARCC2  | SWI/SNF related, matrix associated, actin dependent regulator of chromatin subfamily c member 2 | 1.042 |
| 672017191 | N/A      | N/A                                                                                             | 1.048 |
| 157821155 | RNF151   | ring finger protein 151                                                                         | 1.052 |
| 149020413 | Zfp599   | zinc finger protein 599                                                                         | 1.054 |
| 564377118 | WDR53    | WD repeat domain 53                                                                             | 1.058 |
| 149053436 | FAM57A   | family with sequence similarity 57 member A                                                     | 1.075 |
| 568983685 | TMEM161B | transmembrane protein 161B                                                                      | 1.075 |
| 149045719 | PIGO     | phosphatidylinositol glycan anchor biosynthesis class O                                         | 1.076 |
| 564296988 | ZNF235   | zinc finger protein 235                                                                         | 1.078 |
| 564327667 | TSHZ3    | teashirt zinc finger homeobox 3                                                                 | 1.080 |

|           |          |                                                                    |       |
|-----------|----------|--------------------------------------------------------------------|-------|
| 675706185 | N/A      | N/A                                                                | 1.082 |
| 61556894  | Akr1b10  | aldo-keto reductase family 1, member B10 (aldose reductase)        | 1.085 |
| 444741673 | CYHR1    | cysteine and histidine rich 1                                      | 1.111 |
| 149016574 | ZNF324   | zinc finger protein 324                                            | 1.113 |
| 149050030 | MTRF1    | mitochondrial translation release factor 1                         | 1.114 |
| 672024381 | N/A      | N/A                                                                | 1.134 |
| 80751167  | PCDHGA5  | protocadherin gamma subfamily A, 5                                 | 1.135 |
| 149051391 | N/A      | N/A                                                                | 1.135 |
| 293356488 | RIC1     | RIC1 homolog, RAB6A GEF complex partner 1                          | 1.136 |
| 961766127 | N/A      | N/A                                                                | 1.147 |
| 564323075 | ZMAT1    | zinc finger matrin-type 1                                          | 1.163 |
| 672023090 | N/A      | N/A                                                                | 1.166 |
| 19424314  | KCNE2    | potassium voltage-gated channel subfamily E regulatory subunit 2   | 1.167 |
| 75832143  | FLVCR2   | feline leukemia virus subgroup C cellular receptor family member 2 | 1.170 |
| 149048115 | KIAA0907 | KIAA0907                                                           | 1.173 |
| 672015275 | N/A      | N/A                                                                | 1.183 |
| 564341299 | N/A      | N/A                                                                | 1.185 |
| 589930143 | N/A      | N/A                                                                | 1.188 |
| 57526957  | ACY3     | aminoacylase 3                                                     | 1.189 |
| 62644808  | ADAMTSL2 | ADAMTS like 2                                                      | 1.195 |
| 672063675 | N/A      | N/A                                                                | 1.208 |
| 625210478 | N/A      | N/A                                                                | 1.219 |
| 664771727 | N/A      | N/A                                                                | 1.224 |
| 148689488 | SYN3     | synapsin III                                                       | 1.225 |
| 392338392 | PCNT     | pericentrin                                                        | 1.238 |
| 124378035 | TNRC6C   | trinucleotide repeat containing 6C                                 | 1.239 |
| 672038660 | ZNF48    | zinc finger protein 48                                             | 1.244 |
| 14277700  | RPS12    | ribosomal protein S12                                              | 1.245 |
| 564297338 | ZNF816   | zinc finger protein 816                                            | 1.248 |
| 564312671 | N/A      | N/A                                                                | 1.268 |
| 293342693 | SLC35B3  | solute carrier family 35 member B3                                 | 1.271 |
| 256220048 | PCDHGC5  | protocadherin gamma subfamily C, 5                                 | 1.272 |
| 564323057 | ARMCX4   | armadillo repeat containing, X-linked 4                            | 1.275 |
| 755566692 | HUWE1    | HECT, UBA and WWE domain containing 1, E3 ubiquitin protein ligase | 1.288 |
| 672070295 | BAHCC1   | BAH domain and coiled-coil containing 1                            | 1.298 |

|           |              |                                                                            |       |
|-----------|--------------|----------------------------------------------------------------------------|-------|
| 564302599 | INSM1        | INSM transcriptional repressor 1                                           | 1.310 |
| 672031995 | Kdm6a        | lysine demethylase 6A                                                      | 1.326 |
| 112984482 | SBSN         | suprabasin                                                                 | 1.334 |
| 293358436 | FOXP2        | forkhead box P2                                                            | 1.342 |
| 148705008 | N/A          | N/A                                                                        | 1.350 |
| 564299767 | IPO11        | importin 11                                                                | 1.362 |
| 157818947 | FAAP24       | Fanconi anemia core complex associated protein 24                          | 1.365 |
| 564318679 | CCSER2       | coiled-coil serine rich protein 2                                          | 1.370 |
| 669303362 | N/A          | N/A                                                                        | 1.388 |
| 392340509 | PTPRD        | protein tyrosine phosphatase, receptor type D                              | 1.396 |
| 149020413 | Zfp599       | zinc finger protein 599                                                    | 1.399 |
| 109474690 | KLHL32       | kelch like family member 32                                                | 1.401 |
| 564307839 | JAG2         | jagged 2                                                                   | 1.408 |
| 564315753 | N/A          | N/A                                                                        | 1.409 |
| 148675156 | KLHL25       | kelch like family member 25                                                | 1.414 |
| 564320493 | KDM3B        | lysine demethylase 3B                                                      | 1.466 |
| 672043253 | DENND4B      | DENN domain containing 4B                                                  | 1.477 |
| 564302924 | TSHZ2        | teashirt zinc finger homeobox 2                                            | 1.481 |
| 564311918 | C2orf72      | chromosome 2 open reading frame 72                                         | 1.485 |
| 11560067  | GPR173       | G protein-coupled receptor 173                                             | 1.505 |
| 392339412 | PLA2G4E      | phospholipase A2 group IVE                                                 | 1.508 |
| 564313510 | BPTF         | bromodomain PHD finger transcription factor                                | 1.529 |
| 149067796 | TMEM219      | transmembrane protein 219                                                  | 1.539 |
| 564300485 | LOC102551095 | uncharacterized LOC102551095                                               | 1.546 |
| 8393418   | GAPDH        | glyceraldehyde-3-phosphate dehydrogenase                                   | 1.548 |
| 564311695 | PIKFYVE      | phosphoinositide kinase, FYVE-type zinc finger containing                  | 1.564 |
| 564297736 | N/A          | N/A                                                                        | 1.565 |
| 293358899 | ANKRD26      | ankyrin repeat domain 26                                                   | 1.569 |
| 672072352 | Evi5l        | ecotropic viral integration site 5 like                                    | 1.576 |
| 16758572  | DLK1         | delta like non-canonical Notch ligand 1                                    | 1.578 |
| 635017744 | N/A          | N/A                                                                        | 1.579 |
| 564313842 | SLC38A10     | solute carrier family 38 member 10                                         | 1.585 |
| 672012705 | SYNE1        | spectrin repeat containing nuclear envelope protein 1                      | 1.617 |
| 672059136 | N/A          | N/A                                                                        | 1.619 |
| 672051147 | N/A          | N/A                                                                        | 1.649 |
| 109484871 | HERC1        | HECT and RLD domain containing E3 ubiquitin protein ligase family member 1 | 1.659 |

|           |              |                                                          |       |
|-----------|--------------|----------------------------------------------------------|-------|
| 209571573 | ZNF707       | zinc finger protein 707                                  | 1.680 |
| 672088752 | MCF2         | MCF.2 cell line derived transforming sequence            | 1.684 |
| 564317923 | SACS         | sacsin molecular chaperone                               | 1.684 |
| 966979996 | N/A          | N/A                                                      | 1.684 |
| 672087657 | N/A          | N/A                                                      | 1.702 |
| 164448680 | HBB          | hemoglobin subunit beta                                  | 1.704 |
| 829992801 | N/A          | N/A                                                      | 1.704 |
| 918591579 | N/A          | N/A                                                      | 1.707 |
| 817273427 | N/A          | N/A                                                      | 1.709 |
| 568959785 | PRDM10       | PR/SET domain 10                                         | 1.720 |
| 564312627 | ZFP62        | ZFP62 zinc finger protein                                | 1.722 |
| 564310553 | TOPBP1       | topoisomerase (DNA) II binding protein 1                 | 1.732 |
| 568990288 | NIPBL        | NIPBL, cohesin loading factor                            | 1.747 |
| 672013014 | N/A          | N/A                                                      | 1.770 |
| 149041357 | RGD1311744   | similar to RIKEN cDNA 5830475I06                         | 1.773 |
| 293362695 | Akap17b      | A kinase (PRKA) anchor protein 17B                       | 1.784 |
| 568973498 | TNRC6C       | trinucleotide repeat containing 6C                       | 1.791 |
| 149020413 | Zfp599       | zinc finger protein 599                                  | 1.829 |
| 149029159 | N/A          | N/A                                                      | 1.841 |
| 725571770 | N/A          | N/A                                                      | 1.848 |
| 149042879 | N/A          | N/A                                                      | 1.869 |
| 755515866 | BRAF         | B-Raf proto-oncogene, serine/threonine kinase            | 1.876 |
| 564326713 | ZC3H4        | zinc finger CCCH-type containing 4                       | 1.881 |
| 672057084 | N/A          | N/A                                                      | 1.906 |
| 829923130 | N/A          | N/A                                                      | 1.915 |
| 569001477 | MTCL1        | microtubule crosslinking factor 1                        | 1.931 |
| 672089580 | LOC103694865 | TATA-binding protein-associated factor 2N-like           | 1.932 |
| 148681013 | SYT14        | synaptotagmin 14                                         | 1.942 |
| 569012000 | KLF8         | Kruppel like factor 8                                    | 1.954 |
| 564395350 | N/A          | N/A                                                      | 1.964 |
| 2231145   | N/A          | N/A                                                      | 1.978 |
| 564310412 | DOPEY1       | dopey family member 1                                    | 1.987 |
| 672023431 | ZCWPW2       | zinc finger CW-type and PWWP domain containing 2         | 1.991 |
| 672016550 | RAPGEF1      | Rap guanine nucleotide exchange factor 1                 | 1.996 |
| 148708817 | CA5B         | carbonic anhydrase 5B                                    | 2.000 |
| 16758266  | NME3         | NME/NM23 nucleoside diphosphate kinase 3                 | 2.007 |
| 672027860 | APBB2        | amyloid beta precursor protein binding family B member 2 | 2.023 |



|           |              |                                                        |       |
|-----------|--------------|--------------------------------------------------------|-------|
| 564313512 | N/A          | N/A                                                    | 2.085 |
| 672035395 | DMWD         | dystrophia myotonica, WD repeat containing             | 2.101 |
| 149030324 | CHRNA2       | cholinergic receptor nicotinic alpha 2 subunit         | 2.112 |
| 528758424 | N/A          | N/A                                                    | 2.152 |
| 157822691 | NTSR1        | neurotensin receptor 1                                 | 2.178 |
| 149042883 | LOC100365365 | rCG32328-like                                          | 2.183 |
| 752385306 | N/A          | N/A                                                    | 2.204 |
| 392334596 | RSPH3        | radial spoke 3 homolog                                 | 2.222 |
| 148696062 | LRRC57       | leucine rich repeat containing 57                      | 2.228 |
| 672020363 | N/A          | N/A                                                    | 2.244 |
| 148702471 | N/A          | N/A                                                    | 2.248 |
| 564339225 | N/A          | N/A                                                    | 2.250 |
| 1478205   | PPP1R14B     | protein phosphatase 1 regulatory inhibitor subunit 14B | 2.266 |
| 672029704 | ZCCHC6       | zinc finger CCHC-type containing 6                     | 2.273 |
| 568972622 | BPTF         | bromodomain PHD finger transcription factor            | 2.292 |
| 564324736 | L3MBTL3      | l(3)mbt-like 3 (Drosophila)                            | 2.296 |
| 564310904 | N/A          | N/A                                                    | 2.299 |
| 24308466  | ITGB3        | integrin subunit beta 3                                | 2.303 |
| 913513476 | N/A          | N/A                                                    | 2.322 |
| 149028845 | CCNB2        | cyclin B2                                              | 2.368 |
| 149043399 | TAPBP        | TAP binding protein                                    | 2.406 |
| 293348472 | ZFR2         | zinc finger RNA binding protein 2                      | 2.409 |
| 672088045 | N/A          | N/A                                                    | 2.423 |
| 672069572 | KANSL1       | KAT8 regulatory NSL complex subunit 1                  | 2.457 |
| 672056365 | KIAA0586     | KIAA0586                                               | 2.459 |
| 672020328 | MTA3         | metastasis associated 1 family member 3                | 2.481 |
| 594100882 | N/A          | N/A                                                    | 2.509 |
| 672013187 | DMWD         | dystrophia myotonica, WD repeat containing             | 2.555 |
| 148664561 | DTNA         | dystrobrevin alpha                                     | 2.684 |
| 672061705 | KMT2A        | lysine methyltransferase 2A                            | 2.760 |
| 564313514 | BPTF         | bromodomain PHD finger transcription factor            | 2.807 |
| 293352633 | FBRSL1       | fibrosin like 1                                        | 2.880 |
| 564331258 | ZNF688       | zinc finger protein 688                                | 2.910 |
| 672025361 | BPTF         | bromodomain PHD finger transcription factor            | 3.000 |
| 28972866  | CSMD3        | CUB and Sushi multiple domains 3                       | 3.000 |
| 672026534 | N/A          | N/A                                                    | 3.018 |
| 672044124 | N/A          | N/A                                                    | 3.049 |
| 672088045 | N/A          | N/A                                                    | 3.080 |
| 478536438 | N/A          | N/A                                                    | 3.096 |

|           |              |                                                           |       |
|-----------|--------------|-----------------------------------------------------------|-------|
| 109488483 | KIAA0753     | KIAA0753                                                  | 3.216 |
| 672053979 | KCNQ4        | potassium voltage-gated channel subfamily Q member 4      | 3.240 |
| 564313508 | BPTF         | bromodomain PHD finger transcription factor               | 3.248 |
| 148690434 | MRPS34       | mitochondrial ribosomal protein S34                       | 3.263 |
| 564299019 | KIAA2026     | KIAA2026                                                  | 3.322 |
| 124378035 | TNRC6C       | trinucleotide repeat containing 6C                        | 3.341 |
| 470605072 | N/A          | N/A                                                       | 3.341 |
| 568964954 | EPB41L2      | erythrocyte membrane protein band 4.1 like 2              | 3.402 |
| 333033763 | TTR          | transthyretin                                             | 3.420 |
| 4506663   | RPL8         | ribosomal protein L8                                      | 3.565 |
| 564311685 | PIKFYVE      | phosphoinositide kinase, FYVE-type zinc finger containing | 3.585 |
| 157823859 | METTTL27     | methyltransferase like 27                                 | 3.622 |
| 147907212 | ASAP2        | ArfGAP with SH3 domain, ankyrin repeat and PH domain 2    | 3.782 |
| 672068318 | PITPNM3      | PITPNM family member 3                                    | 3.841 |
| 564324736 | L3MBTL3      | l(3)mbt-like 3 (Drosophila)                               | 3.926 |
| 672040275 | CPEB3        | cytoplasmic polyadenylation element binding protein 3     | 4.000 |
| 564317997 | N/A          | N/A                                                       | 4.080 |
| 672060766 | N/A          | N/A                                                       | 4.358 |
| 149031942 | N/A          | N/A                                                       | 4.409 |
| 164448680 | HBB          | hemoglobin subunit beta                                   | 4.465 |
| 564329920 | EMSY         | EMSY, BRCA2 interacting transcriptional repressor         | 4.585 |
| 564297371 | LOC102556967 | zinc finger protein 484-like                              | 4.585 |
| 564395696 | TANGO6       | transport and golgi organization 6 homolog                | 4.585 |
| 672088045 | N/A          | N/A                                                       | 4.636 |
| 149018624 | DOCK3        | dedicator of cytokinesis 3                                | 4.644 |
| 148679862 | SLC35F3      | solute carrier family 35 member F3                        | 4.858 |
| 672087664 | N/A          | N/A                                                       | 4.858 |
| 880855761 | N/A          | N/A                                                       | 4.907 |
| 521036477 | N/A          | N/A                                                       | 4.907 |
| 148223355 | ASAP2        | ArfGAP with SH3 domain, ankyrin repeat and PH domain 2    | 4.943 |
| 50370130  | PALLD        | palladin, cytoskeletal associated protein                 | 5.000 |
| 392338862 | ATP8B2       | ATPase phospholipid transporting 8B2                      | 5.044 |
| 755783452 | N/A          | N/A                                                       | 5.044 |
| 672020628 | ATXN7L1      | ataxin 7 like 1                                           | 5.129 |

|           |          |                                                                    |       |
|-----------|----------|--------------------------------------------------------------------|-------|
| 149056134 | Dzf17    | zinc finger protein 17                                             | 5.129 |
| 45478072  | N/A      | N/A                                                                | 5.129 |
| 293356488 | RIC1     | RIC1 homolog, RAB6A GEF complex partner 1                          | 5.170 |
| 564329135 | BLM      | Bloom syndrome RecQ like helicase                                  | 5.248 |
| 149066939 | PTPRB    | protein tyrosine phosphatase, receptor type B                      | 5.248 |
| 293349510 | STAC     | SH3 and cysteine rich domain                                       | 5.248 |
| 742171392 | N/A      | N/A                                                                | 5.248 |
| 74184716  | Kat6b    | K(lysine) acetyltransferase 6B                                     | 5.392 |
| 392338425 | FAM184A  | family with sequence similarity 184 member A                       | 5.459 |
| 564397808 | HNRNPH3  | heterogeneous nuclear ribonucleoprotein H3                         | 5.459 |
| 293341054 | IQCE     | IQ motif containing E                                              | 5.492 |
| 564311685 | PIKFYVE  | phosphoinositide kinase, FYVE-type zinc finger containing          | 5.555 |
| 293346251 | TMEM62   | transmembrane protein 62                                           | 5.700 |
| 755566692 | HUWE1    | HECT, UBA and WWE domain containing 1, E3 ubiquitin protein ligase | 5.728 |
| 564309734 | IGSF9B   | immunoglobulin superfamily member 9B                               | 5.764 |
| 149038394 | N/A      | N/A                                                                | 5.781 |
| 564329926 | EMSY     | EMSY, BRCA2 interacting transcriptional repressor                  | 5.807 |
| 293352381 | PAN3     | PAN3 poly(A) specific ribonuclease subunit                         | 5.807 |
| 149035182 | SRP72    | signal recognition particle 72                                     | 5.807 |
| 70778849  | Abcg3    | ATP-binding cassette, sub-family G (WHITE), member 3               | 5.833 |
| 62647202  | KRBA1    | KRAB-A domain containing 1                                         | 5.833 |
| 564301606 | RIF1     | replication timing regulatory factor 1                             | 5.833 |
| 564296997 | ZNF45    | zinc finger protein 45                                             | 5.833 |
| 149059984 | IL13RA1  | interleukin 13 receptor subunit alpha 1                            | 5.907 |
| 148687007 | CEP128   | centrosomal protein 128                                            | 5.977 |
| 158262015 | LCAT     | lecithin-cholesterol acyltransferase                               | 5.977 |
| 672018101 | N/A      | N/A                                                                | 6.000 |
| 663243313 | N/A      | N/A                                                                | 6.087 |
| 564305188 | FANCG    | Fanconi anemia complementation group G                             | 6.150 |
| 124487463 | GPR161   | G protein-coupled receptor 161                                     | 6.150 |
| 62656582  | KIAA0100 | KIAA0100                                                           | 6.190 |
| 672035395 | DMWD     | dystrophia myotonica, WD repeat containing                         | 6.209 |
| 568972626 | BPTF     | bromodomain PHD finger transcription factor                        | 6.214 |
| 149046941 | BEND3    | BEN domain containing 3                                            | 6.229 |

|           |          |                                                                    |       |
|-----------|----------|--------------------------------------------------------------------|-------|
| 564311685 | PIKFYVE  | phosphoinositide kinase, FYVE-type zinc finger containing          | 6.267 |
| 672017085 | N/A      | N/A                                                                | 6.304 |
| 625198911 | N/A      | N/A                                                                | 6.340 |
| 672070295 | BAHCC1   | BAH domain and coiled-coil containing 1                            | 6.375 |
| 66730276  | C7orf49  | chromosome 7 open reading frame 49                                 | 6.375 |
| 672052120 | RBM12B   | RNA binding motif protein 12B                                      | 6.375 |
| 149038409 | ACSF3    | acyl-CoA synthetase family member 3                                | 6.392 |
| 293344867 | N/A      | N/A                                                                | 6.443 |
| 157821741 | LY86     | lymphocyte antigen 86                                              | 6.524 |
| 148682823 | N/A      | N/A                                                                | 6.570 |
| 149064065 | ZMYM5    | zinc finger MYM-type containing 5                                  | 6.600 |
| 672027858 | APBB2    | amyloid beta precursor protein binding family B member 2           | 6.629 |
| 392342157 | PHIP     | pleckstrin homology domain interacting protein                     | 6.629 |
| 392351087 | HAGHL    | hydroxyacylglutathione hydrolase-like                              | 6.644 |
| 197384571 | UBA2     | ubiquitin like modifier activating enzyme 2                        | 6.658 |
| 564355419 | Nbas     | neuroblastoma amplified sequence                                   | 6.687 |
| 755566690 | HUWE1    | HECT, UBA and WWE domain containing 1, E3 ubiquitin protein ligase | 6.700 |
| 568914642 | N/A      | N/A                                                                | 6.700 |
| 672028287 | Kat6b    | K(lysine) acetyltransferase 6B                                     | 6.714 |
| 564307792 | TECPR2   | tectonin beta-propeller repeat containing 2                        | 6.768 |
| 6978675   | CNTF     | ciliary neurotrophic factor                                        | 6.794 |
| 672046728 | N/A      | N/A                                                                | 6.820 |
| 569009290 | TENM1    | teneurin transmembrane protein 1                                   | 6.858 |
| 564321833 | SLC26A8  | solute carrier family 26 member 8                                  | 6.870 |
| 672014312 | ZNF646   | zinc finger protein 646                                            | 6.977 |
| 568914628 | GARNL3   | GTPase activating Rap/RanGAP domain like 3                         | 6.989 |
| 149031942 | N/A      | N/A                                                                | 6.989 |
| 149049553 | A2M      | alpha-2-macroglobulin                                              | 7.044 |
| 913507039 | N/A      | N/A                                                                | 7.098 |
| 149034450 | N/A      | N/A                                                                | 7.119 |
| 672063750 | N/A      | N/A                                                                | 7.143 |
| 564297338 | ZNF816   | zinc finger protein 816                                            | 7.180 |
| 625182464 | N/A      | N/A                                                                | 7.209 |
| 880863148 | N/A      | N/A                                                                | 7.248 |
| 300797930 | Tmem223  | transmembrane protein 223                                          | 7.267 |
| 149054972 | SLC26A11 | solute carrier family 26 member 11                                 | 7.401 |
| 564316929 | FRYL     | FRY like transcription coactivator                                 | 7.484 |

|           |           |                                                       |       |
|-----------|-----------|-------------------------------------------------------|-------|
| 568974167 | SLC26A11  | solute carrier family 26 member 11                    | 7.524 |
| 149026222 | N/A       | N/A                                                   | 7.531 |
| 564322493 | RPGR      | retinitis pigmentosa GTPase regulator                 | 7.539 |
| 149050028 | NAA16     | N(alpha)-acetyltransferase 16, NatA auxiliary subunit | 7.570 |
| 149057336 | ZSCAN2    | zinc finger and SCAN domain containing 2              | 7.570 |
| 148666118 | N/A       | N/A                                                   | 7.577 |
| 672022615 | N/A       | N/A                                                   | 7.585 |
| 6690510   | CHD9      | chromodomain helicase DNA binding protein 9           | 7.600 |
| 568931336 | EPB41     | erythrocyte membrane protein band 4.1                 | 7.607 |
| 62650795  | DACT1     | dishevelled binding antagonist of beta catenin 1      | 7.615 |
| 672054770 | LOC500584 | similar to casein kinase 1, gamma 3 isoform 2         | 7.615 |
| 575403049 | ERBIN     | erbb2 interacting protein                             | 7.622 |
| 672069572 | KANSL1    | KAT8 regulatory NSL complex subunit 1                 | 7.658 |
| 564342627 | TP53BP1   | tumor protein p53 binding protein 1                   | 7.687 |
| 568941582 | IQSEC1    | IQ motif and Sec7 domain 1                            | 7.721 |
| 672019127 | N/A       | N/A                                                   | 7.794 |
| 672013889 | KIF7      | kinesin family member 7                               | 7.807 |
| 392342412 | N/A       | N/A                                                   | 7.814 |
| 634841768 | N/A       | N/A                                                   | 7.858 |
| 60360628  | ATP8A1    | ATPase phospholipid transporting 8A1                  | 7.877 |
| 672029702 | ZCCHC6    | zinc finger CCHC-type containing 6                    | 7.907 |
| 148708709 | N/A       | N/A                                                   | 7.931 |
| 568979792 | NPAS3     | neuronal PAS domain protein 3                         | 7.954 |
| 672032215 | REPS2     | RALBP1 associated Eps domain containing 2             | 7.994 |
| 28174920  | RPL17     | ribosomal protein L17                                 | 8.006 |
| 568979794 | NPAS3     | neuronal PAS domain protein 3                         | 8.033 |
| 564312515 | SH3PXD2B  | SH3 and PX domains 2B                                 | 8.050 |
| 157819803 | BACH1     | BTB domain and CNC homolog 1                          | 8.087 |
| 149015786 | N/A       | N/A                                                   | 8.087 |
| 109472884 | UBE3C     | ubiquitin protein ligase E3C                          | 8.155 |
| 124487463 | GPR161    | G protein-coupled receptor 161                        | 8.165 |
| 440913556 | N/A       | N/A                                                   | 8.185 |
| 148675846 | FAM114A2  | family with sequence similarity 114 member A2         | 8.190 |
| 608785644 | NPAS3     | neuronal PAS domain protein 3                         | 8.195 |
| 921126126 | N/A       | N/A                                                   | 8.195 |
| 672022290 | KIF21A    | kinesin family member 21A                             | 8.219 |
| 293347435 | PTPRD     | protein tyrosine phosphatase, receptor type D         | 8.224 |
| 672022270 | KIF21A    | kinesin family member 21A                             | 8.317 |
| 564378315 | Zfp853    | zinc finger protein 853                               | 8.375 |

|           |               |                                                    |        |
|-----------|---------------|----------------------------------------------------|--------|
| 564297942 | LOC103690302  | AF4/FMR2 family member 2                           | 8.379  |
| 149066285 | PHF20L1       | PHD finger protein 20-like 1                       | 8.430  |
| 806549497 | MYH9          | myosin heavy chain 9                               | 8.455  |
| 568979594 | SYT16         | synaptotagmin 16                                   | 8.551  |
| 392340959 | ITSN2         | intersectin 2                                      | 8.570  |
| 564380050 | 2410141K09Rik | RIKEN cDNA 2410141K09 gene                         | 8.596  |
| 325530254 | FAM109A       | family with sequence similarity 109 member A       | 8.669  |
| 149064065 | ZMYM5         | zinc finger MYM-type containing 5                  | 8.683  |
| 564317999 | N/A           | N/A                                                | 8.725  |
| 149051960 | FLYWCH2       | FLYWCH family member 2                             | 8.762  |
| 672022290 | KIF21A        | kinesin family member 21A                          | 8.814  |
| 564377502 | EIF4G1        | eukaryotic translation initiation factor 4 gamma 1 | 8.994  |
| 392341692 | FMNL3         | formin like 3                                      | 9.071  |
| 927135720 | N/A           | N/A                                                | 9.095  |
| 148675846 | FAM114A2      | family with sequence similarity 114 member A2      | 9.157  |
| 755541276 | N/A           | N/A                                                | 9.197  |
| 987404821 | N/A           | N/A                                                | 9.311  |
| 672033554 | LOC102557335  | uncharacterized LOC102557335                       | 9.713  |
| 672035060 | CIC           | capicua transcriptional repressor                  | 10.209 |

**Supplementary Table S2. The lists of BPA-responsive genes that have been associated with ASD in SFARI database.**

| <b>ASD-related DEGs in both sexes</b> |               |                                                                    |                       |                            |
|---------------------------------------|---------------|--------------------------------------------------------------------|-----------------------|----------------------------|
| <b>ID</b>                             | <b>Symbol</b> | <b>Entrez Gene Name</b>                                            | <b>Expr Log Ratio</b> | <b>Chromosome Location</b> |
| 672035060                             | CIC           | capicua transcriptional repressor                                  | -8.114                | 1q21                       |
| 755566690                             | HUWE1         | HECT, UBA and WWE domain containing 1, E3 ubiquitin protein ligase | -7.864                | Xq13                       |
| 226698394                             | UNC80         | unc-80 homolog, NALCN channel complex subunit                      | -7.349                | 9q32                       |
| 564315185                             | CUX1          | cut like homeobox 1                                                | -7.209                | 12q12                      |
| 564303135                             | KMT2C         | lysine methyltransferase 2C                                        | -6.870                | 4q11                       |
| 149065087                             | CADPS2        | calcium dependent secretion activator 2                            | -5.883                | 4q22                       |
| 564329920                             | EMSY          | EMSY, BRCA2 interacting transcriptional repressor                  | -5.585                | 1q32                       |
| 148668227                             | GPC6          | glypican 6                                                         | -5.248                | 15q24                      |
| 672066092                             | UNC80         | unc-80 homolog, NALCN channel complex subunit                      | -4.954                | 9q32                       |
| 672035060                             | CIC           | capicua transcriptional repressor                                  | -4.863                | 1q21                       |
| 564329926                             | EMSY          | EMSY, BRCA2 interacting transcriptional repressor                  | -4.655                | 1q32                       |
| 392334411                             | ANKRD1<br>1   | ankyrin repeat domain 11                                           | -4.358                | 19q12                      |
| 54019438                              | PCDHAC<br>1   | protocadherin alpha subfamily C, 1                                 | -3.170                | 18p11                      |
| 124486586                             | AUTS2         | AUTS2, activator of transcription and developmental regulator      | -2.742                | 12q12                      |
| 291327518                             | AVP           | arginine vasopressin                                               | -2.734                | 3q36                       |
| 564303143                             | KMT2C         | lysine methyltransferase 2C                                        | -2.497                | 4q11                       |
| 392334411                             | ANKRD1<br>1   | ankyrin repeat domain 11                                           | -2.301                | 19q12                      |
| 755566692                             | HUWE1         | HECT, UBA and WWE domain containing 1, E3 ubiquitin protein ligase | -2.222                | Xq13                       |
| 198278465                             | DYDC2         | DPY30 domain containing 2                                          | -2.190                | 16p14                      |
| 25742828                              | SCN7A         | sodium voltage-gated channel alpha subunit 7                       | -2.129                | 3q21                       |
| 19424304                              | CHRN3         | cholinergic receptor nicotinic beta 3 subunit                      | -2.000                | 16q12.3                    |
| 149066014                             | PVALB         | parvalbumin                                                        | -1.939                | 7q34                       |
| 226698394                             | UNC80         | unc-80 homolog, NALCN channel complex subunit                      | -1.781                | 9q32                       |

|           |          |                                                                                                 |        |         |
|-----------|----------|-------------------------------------------------------------------------------------------------|--------|---------|
| 54019438  | PCDHAC1  | protocadherin alpha subfamily C, 1                                                              | -1.704 | 18p11   |
| 392332008 | SLC38A10 | solute carrier family 38 member 10                                                              | -1.568 | 10q32.3 |
| 158186711 | F13A1    | coagulation factor XIII A chain                                                                 | -1.510 | 17p12   |
| 6981148   | LEP      | leptin                                                                                          | -1.436 | 4q22    |
| 672065933 | DOCK10   | dedicator of cytokinesis 10                                                                     | -1.436 | 9q34    |
| 755566692 | HUWE1    | HECT, UBA and WWE domain containing 1, E3 ubiquitin protein ligase                              | -1.410 | Xq13    |
| 672061705 | KMT2A    | lysine methyltransferase 2A                                                                     | -1.326 | 8q22    |
| 300794534 | WDR93    | WD repeat domain 93                                                                             | -1.322 | 1q31    |
| 158187533 | ABCA13   | ATP binding cassette subfamily A member 13                                                      | -1.322 | 14q21   |
| 148689488 | SYN3     | synapsin III                                                                                    | -1.308 | 7q13    |
| 564329920 | EMSY     | EMSY, BRCA2 interacting transcriptional repressor                                               | -1.275 | 1q32    |
| 6981332   | SERPINE1 | serpin family E member 1                                                                        | -1.184 | 12q12   |
| 25453414  | ASS1     | argininosuccinate synthase 1                                                                    | -1.000 | 3p12    |
| 149025238 | ESRRB    | estrogen related receptor beta                                                                  | -1.000 | 6q31    |
| 149053793 | TSPOAP1  | TSPO associated protein 1                                                                       | -0.970 | 10q26   |
| 124486586 | AUTS2    | AUTS2, activator of transcription and developmental regulator                                   | -0.941 | 12q12   |
| 564329916 | EMSY     | EMSY, BRCA2 interacting transcriptional repressor                                               | -0.864 | 1q32    |
| 56605720  | GADD45B  | growth arrest and DNA damage inducible beta                                                     | -0.828 | 7q11    |
| 46485412  | ABCA7    | ATP binding cassette subfamily A member 7                                                       | -0.798 | 7q11    |
| 109480098 | SMARCC2  | SWI/SNF related, matrix associated, actin dependent regulator of chromatin subfamily c member 2 | -0.795 | 7q11    |
| 18426812  | ADA      | adenosine deaminase                                                                             | -0.787 | 3q42    |
| 157819203 | TECTA    | tectorin alpha                                                                                  | -0.778 | 8q22    |
| 55741827  | TERT     | telomerase reverse transcriptase                                                                | -0.771 | 1p11    |
| 58865632  | ARHGAP24 | Rho GTPase activating protein 24                                                                | -0.758 | 14p22   |
| 157819949 | ITGA4    | integrin subunit alpha 4                                                                        | -0.748 | 3q24    |
| 46485412  | ABCA7    | ATP binding cassette subfamily A member 7                                                       | -0.739 | 7q11    |
| 157824208 | NTNG1    | netrin G1                                                                                       | -0.737 | 2q41    |
| 19173756  | ERG      | ERG, ETS transcription factor                                                                   | -0.718 | 11q11   |
| 148671621 | VIP      | vasoactive intestinal peptide                                                                   | -0.696 | 1q11    |



|           |          |                                                        |        |         |
|-----------|----------|--------------------------------------------------------|--------|---------|
| 149062990 | CUX1     | cut like homeobox 1                                    | -0.682 | 12q12   |
| 67514566  | POLA2    | DNA polymerase alpha 2, accessory subunit              | -0.665 | 1q43    |
| 158262033 | PAH      | phenylalanine hydroxylase                              | -0.655 | 7q13    |
| 157822365 | LAMC3    | laminin subunit gamma 3                                | -0.651 | 3p12    |
| 13591940  | DPYD     | dihydropyrimidine dehydrogenase                        | -0.642 | 2q41    |
| 25742776  | MC4R     | melanocortin 4 receptor                                | -0.641 | 18q12.1 |
| 672076564 | DDC      | dopa decarboxylase                                     | -0.632 | 14q21   |
| 157824208 | NTNG1    | netrin G1                                              | -0.628 | 2q41    |
| 149053793 | TSPOAP1  | TSPO associated protein 1                              | -0.627 | 10q26   |
| 157819949 | ITGA4    | integrin subunit alpha 4                               | -0.620 | 3q24    |
| 108935976 | DISC1    | disrupted in schizophrenia 1                           | -0.590 | 19q12   |
| 110347493 | PCDHA9   | protocadherin alpha 9                                  | -0.587 | 18p11   |
| 672035060 | CIC      | capicua transcriptional repressor                      | -0.579 | 1q21    |
| 293346999 | MBD4     | methyl-CpG binding domain 4, DNA glycosylase           | -0.573 | 4q42    |
| 213513304 | ATP10A   | ATPase phospholipid transporting 10A (putative)        | -0.554 | 1q22    |
| 6981180   | MAOB     | monoamine oxidase B                                    | -0.518 | Xq11    |
| 564313842 | SLC38A10 | solute carrier family 38 member 10                     | -0.503 | 10q32.3 |
| 564330609 | SYT17    | synaptotagmin 17                                       | -0.494 | 1q35    |
| 6978867   | GABRB1   | gamma-aminobutyric acid type A receptor beta 1 subunit | -0.487 | 14p11   |
| 392332443 | PRKDC    | protein kinase, DNA-activated, catalytic polypeptide   | -0.475 | 11q23   |
| 312922379 | TNN      | tenascin N                                             | -0.469 | 13q22   |
| 13562118  | LRP2     | LDL receptor related protein 2                         | -0.454 | 3q21    |
| 13027400  | GUCY1A2  | guanylate cyclase 1 soluble subunit alpha 2            | -0.453 | 8q11    |
| 392341425 | PTPRB    | protein tyrosine phosphatase, receptor type B          | -0.452 | 7q22    |
| 158138494 | PTPRC    | protein tyrosine phosphatase, receptor type C          | -0.451 | 13q13   |
| 149026322 | PTGER3   | prostaglandin E receptor 3                             | -0.445 | 2q45    |
| 78126167  | SLC1A2   | solute carrier family 1 member 2                       | -0.445 | 3q32    |
| 51854227  | GSN      | gelsolin                                               | -0.444 | 3p11    |
| 6978629   | CD38     | CD38 molecule                                          | -0.440 | 14q21   |
| 198386351 | TBC1D31  | TBC1 domain family member 31                           | -0.439 | 7q33    |
| 51854227  | GSN      | gelsolin                                               | -0.431 | 3p11    |
| 110347493 | PCDHA9   | protocadherin alpha 9                                  | -0.429 | 18p11   |
| 157823279 | CGNL1    | cingulin like 1                                        | -0.418 | 8q24    |
| 13994179  | SLC24A2  | solute carrier family 24 member 2                      | -0.416 | 5q32    |

|           |          |                                                                    |        |         |
|-----------|----------|--------------------------------------------------------------------|--------|---------|
| 748983333 | PATJ     | PATJ, crumbs cell polarity complex component                       | -0.415 | 5q33    |
| 672041704 | NIPBL    | NIPBL, cohesin loading factor                                      | -0.412 | 2q16    |
| 71043794  | CEP41    | centrosomal protein 41                                             | -0.410 | 4q22    |
| 13591949  | GATM     | glycine amidinotransferase                                         | -0.409 | 3q35    |
| 78126167  | SLC1A2   | solute carrier family 1 member 2                                   | -0.408 | 3q32    |
| 122065191 | ABAT     | 4-aminobutyrate aminotransferase                                   | -0.401 | 10q12   |
| 77695926  | STAT1    | signal transducer and activator of transcription 1                 | -0.399 | 9q22    |
| 451172073 | CHRM3    | cholinergic receptor muscarinic 3                                  | -0.399 | 17q12.1 |
| 28972652  | SLC12A5  | solute carrier family 12 member 5                                  | -0.394 | 3q42    |
| 11177892  | KCNT1    | potassium sodium-activated channel subfamily T member 1            | -0.392 | 3p13    |
| 149052857 | KCNJ12   | potassium voltage-gated channel subfamily J member 12              | -0.392 | 10q22   |
| 110347559 | PCDHA13  | protocadherin alpha 13                                             | -0.391 | 18p11   |
| 166999225 | GRM1     | glutamate metabotropic receptor 1                                  | -0.385 | 1p13    |
| 158303308 | PCCA     | propionyl-CoA carboxylase alpha subunit                            | -0.369 | 15q25   |
| 54019428  | PCDHA5   | protocadherin alpha 5                                              | -0.366 | 18p11   |
| 13591949  | GATM     | glycine amidinotransferase                                         | -0.365 | 3q35    |
| 449784888 | ALDH5A1  | aldehyde dehydrogenase 5 family member A1                          | -0.363 | 17p11   |
| 25453410  | CACNA1B  | calcium voltage-gated channel subunit alpha1 B                     | -0.357 | 3p13    |
| 157822187 | WWOX     | WW domain containing oxidoreductase                                | -0.355 | 19q12   |
| 348041395 | DLGAP2   | DLG associated protein 2                                           | -0.354 | 16q12.5 |
| 197927216 | TBC1D5   | TBC1 domain family member 5                                        | -0.351 | 9q11    |
| 755566690 | HUWE1    | HECT, UBA and WWE domain containing 1, E3 ubiquitin protein ligase | -0.351 | Xq13    |
| 149053793 | TSPOAP1  | TSPO associated protein 1                                          | -0.349 | 10q26   |
| 148747194 | SLC16A7  | solute carrier family 16 member 7                                  | -0.349 | 7q22    |
| 451172073 | CHRM3    | cholinergic receptor muscarinic 3                                  | -0.349 | 17q12.1 |
| 122065191 | ABAT     | 4-aminobutyrate aminotransferase                                   | -0.348 | 10q12   |
| 55741540  | KATNAL1  | katanin catalytic subunit A1 like 1                                | -0.345 | 12p11   |
| 568956384 | ADAMTS18 | ADAM metalloproteinase with thrombospondin type 1 motif 18         | -0.345 | 19q12   |
| 300795140 | TAF1     | TATA-box binding protein associated factor 1                       | -0.342 | Xq22    |

|           |          |                                                                                                 |        |         |
|-----------|----------|-------------------------------------------------------------------------------------------------|--------|---------|
| 815891312 | CACNA1G  | calcium voltage-gated channel subunit alpha1 G                                                  | -0.340 | 10q26   |
| 6981208   | NR3C2    | nuclear receptor subfamily 3 group C member 2                                                   | -0.328 | 19q11   |
| 61557206  | ZBTB16   | zinc finger and BTB domain containing 16                                                        | -0.326 | 8q23    |
| 148705386 | SLC30A3  | solute carrier family 30 member 3                                                               | -0.318 | 6q14    |
| 672043401 | POGZ     | pogo transposable element derived with ZNF domain                                               | -0.317 | 2q34    |
| 63101489  | ACHE     | acetylcholinesterase (Cartwright blood group)                                                   | -0.310 | 12q12   |
| 13994179  | SLC24A2  | solute carrier family 24 member 2                                                               | -0.310 | 5q32    |
| 6981168   | LPL      | lipoprotein lipase                                                                              | -0.308 | 16p14   |
| 109480098 | SMARCC2  | SWI/SNF related, matrix associated, actin dependent regulator of chromatin subfamily c member 2 | -0.307 | 7q11    |
| 77628037  | PEX7     | peroxisomal biogenesis factor 7                                                                 | -0.307 | 1p12    |
| 564326692 | ZC3H4    | zinc finger CCCH-type containing 4                                                              | -0.306 | 1q21    |
| 115292425 | KIRREL3  | kirre like nephrin family adhesion molecule 3                                                   | -0.305 | 8q21    |
| 755566690 | HUWE1    | HECT, UBA and WWE domain containing 1, E3 ubiquitin protein ligase                              | -0.305 | Xq13    |
| 6978789   | SPARCL1  | SPARC like 1                                                                                    | -0.295 | 14p22   |
| 149039905 | TSPAN17  | tetraspanin 17                                                                                  | -0.294 | 17p14   |
| 28972363  | DOCK4    | dedicator of cytokinesis 4                                                                      | -0.292 | 6q21    |
| 51948412  | ETFB     | electron transfer flavoprotein beta subunit                                                     | -0.286 | 1q22    |
| 6981208   | NR3C2    | nuclear receptor subfamily 3 group C member 2                                                   | -0.286 | 19q11   |
| 28972652  | SLC12A5  | solute carrier family 12 member 5                                                               | -0.285 | 3q42    |
| 16758138  | POMT1    | protein O-mannosyltransferase 1                                                                 | -0.285 | 3p12    |
| 50356003  | SCP2     | sterol carrier protein 2                                                                        | -0.284 | 5q34    |
| 564319191 | MCPH1    | microcephalin 1                                                                                 | -0.284 | 16q12.5 |
| 261599034 | IL1RAPL2 | interleukin 1 receptor accessory protein like 2                                                 | -0.280 | Xq32    |
| 16758716  | CACNB2   | calcium voltage-gated channel auxiliary subunit beta 2                                          | -0.279 | 17q12.3 |
| 18959266  | KHDRBS2  | KH RNA binding domain containing, signal transduction associated 2                              | -0.274 | 9q21    |
| 157820049 | LRFN5    | leucine rich repeat and fibronectin type III domain containing 5                                | -0.271 | 6q23    |

|           |         |                                                                    |        |       |
|-----------|---------|--------------------------------------------------------------------|--------|-------|
| 158508684 | BCAS1   | breast carcinoma amplified sequence 1                              | -0.270 | 3q42  |
| 219804406 | DOCK1   | dedicator of cytokinesis 1                                         | -0.269 | 1q41  |
| 392339847 | CADPS2  | calcium dependent secretion activator 2                            | -0.268 | 4q22  |
| 10242377  | GRIK4   | glutamate ionotropic receptor kainate type subunit 4               | -0.267 | 8q22  |
| 13786142  | SLIT3   | slit guidance ligand 3                                             | -0.266 | 10q12 |
| 564382316 | HSD11B1 | hydroxysteroid 11-beta dehydrogenase 1                             | -0.265 | 13q27 |
| 672037217 | OTUD7A  | OTU deubiquitinase 7A                                              | -0.264 | 1q22  |
| 148668227 | GPC6    | glypican 6                                                         | -0.264 | 15q24 |
| 115292425 | KIRREL3 | kirre like nephrin family adhesion molecule 3                      | -0.263 | 8q21  |
| 140971205 | GRIN2A  | glutamate ionotropic receptor NMDA type subunit 2A                 | -0.255 | 10q11 |
| 157817710 | FER     | FER tyrosine kinase                                                | -0.251 | 9q37  |
| 300795140 | TAF1    | TATA-box binding protein associated factor 1                       | -0.248 | Xq22  |
| 158749644 | MCM6    | minichromosome maintenance complex component 6                     | -0.247 | 13q13 |
| 59858990  | UNC13A  | unc-13 homolog A                                                   | -0.246 | 16p14 |
| 54312094  | DAGLA   | diacylglycerol lipase alpha                                        | -0.244 | 1q43  |
| 564391295 | DUSP22  | dual specificity phosphatase 22                                    | -0.244 | 17p12 |
| 25742807  | RASSF5  | Ras association domain family member 5                             | -0.241 | 13q13 |
| 97537309  | SYNJ1   | synaptojanin 1                                                     | -0.240 | 11q11 |
| 449784888 | ALDH5A1 | aldehyde dehydrogenase 5 family member A1                          | -0.236 | 17p11 |
| 158749644 | MCM6    | minichromosome maintenance complex component 6                     | -0.231 | 13q13 |
| 157817839 | SEMA5A  | semaphorin 5A                                                      | -0.230 | 2q22  |
| 197927216 | TBC1D5  | TBC1 domain family member 5                                        | -0.230 | 9q11  |
| 157817710 | FER     | FER tyrosine kinase                                                | -0.225 | 9q37  |
| 13928806  | P2RX4   | purinergic receptor P2X 4                                          | -0.223 | 12q16 |
| 672040941 | ATRNL1  | attractin like 1                                                   | -0.223 | 1q55  |
| 148695758 | CAPRN1  | cell cycle associated protein 1                                    | -0.221 | 3q32  |
| 19705535  | PACS1   | phosphofurin acidic cluster sorting protein 1                      | -0.220 | 1q43  |
| 54312094  | DAGLA   | diacylglycerol lipase alpha                                        | -0.218 | 1q43  |
| 11560055  | KHDRBS3 | KH RNA binding domain containing, signal transduction associated 3 | -0.217 | 7q34  |

|           |              |                                                                        |        |         |
|-----------|--------------|------------------------------------------------------------------------|--------|---------|
| 157821397 | SLC22A1<br>5 | solute carrier family 22 member 15                                     | -0.216 | 2q34    |
| 149066531 | VPS13B       | vacuolar protein sorting 13 homolog B                                  | -0.212 | 7q22    |
| 157817839 | SEMA5A       | semaphorin 5A                                                          | -0.212 | 2q22    |
| 281306814 | RPS6KA2      | ribosomal protein S6 kinase A2                                         | -0.210 | 1q12    |
| 19705535  | PACS1        | phosphofurin acidic cluster sorting protein 1                          | -0.208 | 1q43    |
| 157822271 | DOLK         | dolichol kinase                                                        | -0.207 | 3p12    |
| 37359962  | PLPPR4       | phospholipid phosphatase related 4                                     | -0.207 | 2q41    |
| 39104626  | CAMK2A       | calcium/calmodulin dependent protein kinase II alpha                   | -0.206 | 18q12.1 |
| 39104626  | CAMK2A       | calcium/calmodulin dependent protein kinase II alpha                   | -0.206 | 18q12.1 |
| 402794666 | NRG1         | neuregulin 1                                                           | -0.205 | 16q12.3 |
| 54019432  | PCDHA7       | protocadherin alpha 7                                                  | -0.205 | 18p11   |
| 6978673   | CNR1         | cannabinoid receptor 1                                                 | -0.205 | 5q21    |
| 148747414 | GDA          | guanine deaminase                                                      | -0.203 | 1q51    |
| 149020512 | PDE4A        | phosphodiesterase 4A                                                   | -0.203 | 8q13    |
| 568971594 | GABRA1       | gamma-aminobutyric acid type A receptor alpha1 subunit                 | -0.203 | 10q21   |
| 564387864 | CACNA1<br>D  | calcium voltage-gated channel subunit alpha1 D                         | -0.199 | 16p16   |
| 59858990  | UNC13A       | unc-13 homolog A                                                       | -0.199 | 16p14   |
| 77404395  | SND1         | staphylococcal nuclease and tudor domain containing 1                  | -0.199 | 4q22    |
| 148667088 | ATP2B2       | ATPase plasma membrane Ca <sup>2+</sup> transporting 2                 | -0.199 | 4q42    |
| 109472884 | UBE3C        | ubiquitin protein ligase E3C                                           | -0.198 | 4q11    |
| 26006243  | KCND2        | potassium voltage-gated channel subfamily D member 2                   | -0.197 | 4q22    |
| 672040941 | ATRNL1       | attractin like 1                                                       | -0.196 | 1q55    |
| 11560055  | KHDRBS<br>3  | KH RNA binding domain containing, signal transduction associated 3     | -0.195 | 7q34    |
| 56605990  | LRPPRC       | leucine rich pentatricopeptide repeat containing                       | -0.194 | 6q12    |
| 13591963  | GRM7         | glutamate metabotropic receptor 7                                      | -0.191 | 4q41    |
| 56090379  | POMGNT<br>1  | protein O-linked mannose N-acetylglucosaminyltransferase 1 (beta 1,2-) | -0.191 | 5q35    |
| 148695758 | CAPRIN1      | cell cycle associated protein 1                                        | -0.188 | 3q32    |
| 169234826 | ELP4         | elongator acetyltransferase complex subunit 4                          | -0.186 | 3q33    |

|           |         |                                                                  |        |       |
|-----------|---------|------------------------------------------------------------------|--------|-------|
| 300796855 | PARD3B  | par-3 family cell polarity regulator beta                        | -0.183 | 9q32  |
| 281306738 | PCDH19  | protocadherin 19                                                 | -0.176 | Xq32  |
| 50356003  | SCP2    | sterol carrier protein 2                                         | -0.170 | 5q34  |
| 9665227   | DLG4    | discs large MAGUK scaffold protein 4                             | -0.170 | 10q24 |
| 62945358  | SCFD2   | sec1 family domain containing 2                                  | -0.165 | 14p11 |
| 77404395  | SND1    | staphylococcal nuclease and tudor domain containing 1            | -0.165 | 4q22  |
| 672088848 | PLXNA3  | plexin A3                                                        | -0.163 | Xq37  |
| 124486885 | LRRC7   | leucine rich repeat containing 7                                 | -0.162 | 2q45  |
| 157820049 | LRFN5   | leucine rich repeat and fibronectin type III domain containing 5 | -0.161 | 6q23  |
| 148673176 | FABP7   | fatty acid binding protein 7                                     | -0.158 | 20q12 |
| 6981168   | LPL     | lipoprotein lipase                                               | -0.158 | 16p14 |
| 194474054 | EFR3A   | EFR3 homolog A                                                   | -0.157 | 7q33  |
| 37359962  | PLPPR4  | phospholipid phosphatase related 4                               | -0.157 | 2q41  |
| 97537309  | SYNJ1   | synaptojanin 1                                                   | -0.152 | 11q11 |
| 41281619  | PCDHA10 | protocadherin alpha 10                                           | -0.149 | 18p11 |
| 564388440 | MYO9B   | myosin IXB                                                       | -0.148 | 16p14 |
| 717324516 | SCN8A   | sodium voltage-gated channel alpha subunit 8                     | -0.147 | 7q36  |
| 6980978   | GPD2    | glycerol-3-phosphate dehydrogenase 2                             | -0.146 | 3q21  |
| 288806592 | PRKCB   | protein kinase C beta                                            | -0.143 | 1q36  |
| 109472884 | UBE3C   | ubiquitin protein ligase E3C                                     | -0.142 | 4q11  |
| 815891312 | CACNA1G | calcium voltage-gated channel subunit alpha1 G                   | -0.142 | 10q26 |
| 40254595  | DPYSL2  | dihydropyrimidinase like 2                                       | -0.141 | 15p12 |
| 16758736  | NLGN1   | neuroligin 1                                                     | -0.139 | 2q24  |
| 69096208  | MCC     | mutated in colorectal cancers                                    | -0.134 | 18p11 |
| 69096208  | MCC     | mutated in colorectal cancers                                    | -0.134 | 18p11 |
| 148747541 | HNRNPU  | heterogeneous nuclear ribonucleoprotein U                        | -0.130 | 13q25 |
| 6981520   | SDC2    | syndecan 2                                                       | -0.128 | 7q22  |
| 25453410  | CACNA1B | calcium voltage-gated channel subunit alpha1 B                   | -0.128 | 3p13  |
| 114052913 | CADM2   | cell adhesion molecule 2                                         | -0.126 | 11p12 |
| 149053938 | SLC35B1 | solute carrier family 35 member B1                               | -0.125 | 10q26 |
| 253683488 | NTRK2   | neurotrophic receptor tyrosine kinase 2                          | -0.124 | 17p14 |
| 564326713 | ZC3H4   | zinc finger CCCH-type containing 4                               | -0.121 | 1q21  |
| 166158339 | REEP3   | receptor accessory protein 3                                     | -0.121 | 20p11 |

|           |              |                                                           |        |          |
|-----------|--------------|-----------------------------------------------------------|--------|----------|
| 253683488 | NTRK2        | neurotrophic receptor tyrosine kinase 2                   | -0.121 | 17p14    |
| 476007242 | EPS8         | epidermal growth factor receptor pathway substrate 8      | -0.117 | 4q44     |
| 8393390   | GABRB3       | gamma-aminobutyric acid type A receptor beta3 subunit     | -0.115 | 1q22     |
| 56605990  | LRPPRC       | leucine rich pentatricopeptide repeat containing          | -0.115 | 6q12     |
| 29789269  | GRIA1        | glutamate ionotropic receptor AMPA type subunit 1         | -0.115 | 10q22    |
| 11560079  | KIT          | KIT proto-oncogene receptor tyrosine kinase               | -0.114 | 14p11    |
| 148747541 | HNRNPU       | heterogeneous nuclear ribonucleoprotein U                 | -0.109 | 13q25    |
| 148673176 | FABP7        | fatty acid binding protein 7                              | -0.107 | 20q12    |
| 9665227   | DLG4         | discs large MAGUK scaffold protein 4                      | -0.101 | 10q24    |
| 157818589 | TSPAN7       | tetraspanin 7                                             | -0.100 | Xq12     |
| 300794843 | IQGAP3       | IQ motif containing GTPase activating protein 3           | -0.100 | 2q34     |
| 224967068 | PLCB1        | phospholipase C beta 1                                    | -0.098 | 3q36     |
| 40254595  | DPYSL2       | dihydropyrimidinase like 2                                | -0.096 | 15p12    |
| 281427192 | CDH11        | cadherin 11                                               | -0.096 | 19p14    |
| 748585198 | DLGAP1       | DLG associated protein 1                                  | -0.094 | 9q38     |
| 564350262 | CHD7         | chromodomain helicase DNA binding protein 7               | -0.088 | 5q13     |
| 12408298  | DPP6         | dipeptidyl peptidase like 6                               | -0.086 | 4q11     |
| 149022387 | NCKAP1       | NCK associated protein 1                                  | -0.084 | 3q24     |
| 148747194 | SLC16A7      | solute carrier family 16 member 7                         | -0.080 | 7q22     |
| 220777    | STX1A        | syntaxin 1A                                               | -0.080 | 12q12    |
| 568986834 | KCNMA1       | potassium calcium-activated channel subfamily M alpha 1   | -0.075 | 15p16    |
| 564375060 | SLC39A1<br>1 | solute carrier family 39 member 11                        | -0.070 | 10q32.1  |
| 672065682 | AGAP1        | ArfGAP with GTPase domain, ankyrin repeat and PH domain 1 | -0.053 | 9q35-q36 |
| 29789269  | GRIA1        | glutamate ionotropic receptor AMPA type subunit 1         | -0.052 | 10q22    |
| 83320121  | RBM8A        | RNA binding motif protein 8A                              | -0.052 | 2q34     |
| 953713397 | AGO1         | argonaute 1, RISC catalytic component                     | -0.045 | 5q36     |
| 6978673   | CNR1         | cannabinoid receptor 1                                    | -0.023 | 5q21     |
| 672046314 | AMBRA1       | autophagy and beclin 1 regulator 1                        | 0.034  | 3q24     |
| 9506875   | SMAD4        | SMAD family member 4                                      | 0.047  | 18q12.2  |

|           |          |                                                      |       |           |
|-----------|----------|------------------------------------------------------|-------|-----------|
| 25742663  | MYT1L    | myelin transcription factor 1 like                   | 0.052 | 6q16      |
| 20544149  | CSNK1D   | casein kinase 1 delta                                | 0.053 | 10q32.3   |
| 50511039  | GNB1L    | G protein subunit beta 1 like                        | 0.054 | 11q23     |
| 672073969 | CLASP1   | cytoplasmic linker associated protein 1              | 0.057 | 13q11     |
| 62078949  | GPC4     | glypican 4                                           | 0.063 | Xq36      |
| 25742568  | DPYSL3   | dihydropyrimidinase like 3                           | 0.069 | 18p11-q11 |
| 672044697 | EHMT1    | euchromatic histone lysine methyltransferase 1       | 0.070 | 3p13      |
| 89363040  | PCDHGA11 | protocadherin gamma subfamily A, 11                  | 0.075 | 18p11     |
| 672075032 | MARK1    | microtubule affinity regulating kinase 1             | 0.089 | 13q26     |
| 112807209 | EXT1     | exostosin glycosyltransferase 1                      | 0.090 | 7q31      |
| 149016466 | NIPBL    | NIPBL, cohesin loading factor                        | 0.092 | 2q16      |
| 22024394  | FABP5    | fatty acid binding protein 5                         | 0.092 | 2q23      |
| 164565398 | RBFOX1   | RNA binding fox-1 homolog 1                          | 0.101 | 10q12     |
| 86477155  | PER1     | period circadian regulator 1                         | 0.108 | 10q24     |
| 564320563 | RBM27    | RNA binding motif protein 27                         | 0.109 | 18p11     |
| 30794434  | SRRM4    | serine/arginine repetitive matrix 4                  | 0.112 | 12q16     |
| 47847438  | EXOC3    | exocyst complex component 3                          | 0.118 | 1p11      |
| 18959272  | KCNQ2    | potassium voltage-gated channel subfamily Q member 2 | 0.119 | 3q43      |
| 300793721 | TLK2     | tousled like kinase 2                                | 0.119 | 10q32.1   |
| 393716310 | WAC      | WW domain containing adaptor with coiled-coil        | 0.124 | 17q12.1   |
| 564361244 | TCF20    | transcription factor 20                              | 0.128 | 7q34      |
| 51036652  | SLC33A1  | solute carrier family 33 member 1                    | 0.128 | 2q31      |
| 672063411 | SETD2    | SET domain containing 2                              | 0.131 | 8q32      |
| 157821015 | KDM5B    | lysine demethylase 5B                                | 0.131 | 13q13     |
| 11177894  | TSC1     | TSC complex subunit 1                                | 0.134 | 3p12      |
| 50510937  | MBD5     | methyl-CpG binding domain protein 5                  | 0.134 | 3q12      |
| 8394405   | SLC7A5   | solute carrier family 7 member 5                     | 0.134 | 19q12     |
| 148491097 | DYNC1H1  | dynein cytoplasmic 1 heavy chain 1                   | 0.137 | 6q32      |
| 171543899 | PLXNA4   | plexin A4                                            | 0.139 | 4q22      |
| 213972547 | KAT6A    | lysine acetyltransferase 6A                          | 0.143 | 16q12.5   |
| 157819885 | SETD5    | SET domain containing 5                              | 0.144 | 4q42      |
| 291042494 | MED13L   | mediator complex subunit 13 like                     | 0.145 | 12q16     |
| 157819885 | SETD5    | SET domain containing 5                              | 0.150 | 4q42      |
| 404312698 | CASC4    | cancer susceptibility 4                              | 0.150 | 3q35      |
| 171543899 | PLXNA4   | plexin A4                                            | 0.156 | 4q22      |



|           |           |                                                                       |       |          |
|-----------|-----------|-----------------------------------------------------------------------|-------|----------|
| 564393951 | MBD1      | methyl-CpG binding domain protein 1                                   | 0.157 | 18q12.2  |
| 300793740 | TANC2     | tetratricopeptide repeat, ankyrin repeat and coiled-coil containing 2 | 0.158 | 10q32.1  |
| 149038734 | EIF4EBP2  | eukaryotic translation initiation factor 4E binding protein 2         | 0.158 | 20q11    |
| 19705483  | CLSTN2    | calsyntenin 2                                                         | 0.160 | 8q31     |
| 300793740 | TANC2     | tetratricopeptide repeat, ankyrin repeat and coiled-coil containing 2 | 0.160 | 10q32.1  |
| 124487247 | PRICKLE 2 | prickle planar cell polarity protein 2                                | 0.162 | 4q34     |
| 672042487 | NBEA      | neurobeachin                                                          | 0.163 | 2q26     |
| 564386027 | CHD8      | chromodomain helicase DNA binding protein 8                           | 0.163 | 15p14    |
| 8393104   | CHKB      | choline kinase beta                                                   | 0.166 | 7q34     |
| 33356154  | UBE2H     | ubiquitin conjugating enzyme E2 H                                     | 0.172 | 4q22     |
| 568972665 | TSPOAP1   | TSPO associated protein 1                                             | 0.173 | 10q26    |
| 564303143 | KMT2C     | lysine methyltransferase 2C                                           | 0.176 | 4q11     |
| 209915609 | PRICKLE 1 | prickle planar cell polarity protein 1                                | 0.177 | 7q35     |
| 6978787   | DYRK1A    | dual specificity tyrosine phosphorylation regulated kinase 1A         | 0.179 | 11q11    |
| 61556927  | EIF3G     | eukaryotic translation initiation factor 3 subunit G                  | 0.180 | 8q13     |
| 9506755   | GRIK2     | glutamate ionotropic receptor kainate type subunit 2                  | 0.181 | 20q13    |
| 157821015 | KDM5B     | lysine demethylase 5B                                                 | 0.182 | 13q13    |
| 568972475 | NCOR1     | nuclear receptor corepressor 1                                        | 0.185 | 10q23    |
| 564333605 | BTAF1     | B-TFIID TATA-box binding protein associated factor 1                  | 0.189 | 1q53     |
| 157819605 | EPC2      | enhancer of polycomb homolog 2                                        | 0.190 | 3q12     |
| 403310664 | KMT2E     | lysine methyltransferase 2E                                           | 0.194 | 4q11     |
| 157818041 | YEATS2    | YEATS domain containing 2                                             | 0.195 | 11q23    |
| 119616373 | MEF2C     | myocyte enhancer factor 2C                                            | 0.200 | 2q11     |
| 291042494 | MED13L    | mediator complex subunit 13 like                                      | 0.202 | 12q16    |
| 672031398 | ANKRD1 1  | ankyrin repeat domain 11                                              | 0.203 | 19q12    |
| 145558904 | EML1      | echinoderm microtubule associated protein like 1                      | 0.205 | 6q32     |
| 425384    | CAMK4     | calcium/calmodulin dependent protein kinase IV                        | 0.207 | 18p12    |
| 19705483  | CLSTN2    | calsyntenin 2                                                         | 0.214 | 8q31     |
| 24025618  | DAB1      | DAB1, reelin adaptor protein                                          | 0.217 | 5q33-q34 |

|           |         |                                                                      |       |         |
|-----------|---------|----------------------------------------------------------------------|-------|---------|
| 564386027 | CHD8    | chromodomain helicase DNA binding protein 8                          | 0.219 | 15p14   |
| 2804296   | CDH8    | cadherin 8                                                           | 0.221 | 19p13   |
| 2804296   | CDH8    | cadherin 8                                                           | 0.221 | 19p13   |
| 564361244 | TCF20   | transcription factor 20                                              | 0.222 | 7q34    |
| 672026667 | CUX1    | cut like homeobox 1                                                  | 0.225 | 12q12   |
| 148491097 | DYNC1H1 | dynein cytoplasmic 1 heavy chain 1                                   | 0.225 | 6q32    |
| 51871603  | ST7     | suppression of tumorigenicity 7                                      | 0.225 | 4q21    |
| 157819605 | EPC2    | enhancer of polycomb homolog 2                                       | 0.227 | 3q12    |
| 6978787   | DYRK1A  | dual specificity tyrosine phosphorylation regulated kinase 1A        | 0.228 | 11q11   |
| 11177894  | TSC1    | TSC complex subunit 1                                                | 0.230 | 3p12    |
| 157817961 | PHF3    | PHD finger protein 3                                                 | 0.230 | 9q21    |
| 213972547 | KAT6A   | lysine acetyltransferase 6A                                          | 0.236 | 16q12.5 |
| 157817961 | PHF3    | PHD finger protein 3                                                 | 0.254 | 9q21    |
| 157821435 | RANBP17 | RAN binding protein 17                                               | 0.256 | 10q12   |
| 564328896 | CHD2    | chromodomain helicase DNA binding protein 2                          | 0.258 | 1q31    |
| 74180575  | PPM1D   | protein phosphatase, Mg <sup>2+</sup> /Mn <sup>2+</sup> dependent 1D | 0.260 | 10q26   |
| 425384    | CAMK4   | calcium/calmodulin dependent protein kinase IV                       | 0.262 | 18p12   |
| 403310664 | KMT2E   | lysine methyltransferase 2E                                          | 0.263 | 4q11    |
| 8393652   | KCNJ2   | potassium voltage-gated channel subfamily J member 2                 | 0.267 | 10q32.1 |
| 31543579  | RELN    | reelin                                                               | 0.268 | 4q11    |
| 404312698 | CASC4   | cancer susceptibility 4                                              | 0.270 | 3q35    |
| 157819717 | NIPA2   | non imprinted in Prader-Willi/Angelman syndrome 2                    | 0.270 | 1q22    |
| 149022827 | PAX6    | paired box 6                                                         | 0.271 | 3q33    |
| 157823369 | TERF2   | telomeric repeat binding factor 2                                    | 0.272 | 19q12   |
| 9506755   | GRIK2   | glutamate ionotropic receptor kainate type subunit 2                 | 0.274 | 20q13   |
| 29612542  | H2AFZ   | H2A histone family member Z                                          | 0.285 | 2q44    |
| 157817660 | EBF3    | early B cell factor 3                                                | 0.288 | 1q41    |
| 148687364 | Cux1    | cut-like homeobox 1                                                  | 0.288 | 12q12   |
| 34328151  | TBR1    | T-box, brain 1                                                       | 0.295 | 3q21    |
| 13929168  | FAT1    | FAT atypical cadherin 1                                              | 0.300 | 16q11   |
| 982920935 | DLX6    | distal-less homeobox 6                                               | 0.301 | 4q21    |
| 13929168  | FAT1    | FAT atypical cadherin 1                                              | 0.305 | 16q11   |
| 157818041 | YEATS2  | YEATS domain containing 2                                            | 0.309 | 11q23   |
| 672035060 | CIC     | capicua transcriptional repressor                                    | 0.325 | 1q21    |

|           |             |                                                      |       |         |
|-----------|-------------|------------------------------------------------------|-------|---------|
| 157824124 | NUAK1       | NUAK family kinase 1                                 | 0.335 | 7q13    |
| 564303143 | KMT2C       | lysine methyltransferase 2C                          | 0.336 | 4q11    |
| 29612542  | H2AFZ       | H2A histone family member Z                          | 0.337 | 2q44    |
| 51871603  | ST7         | suppression of tumorigenicity 7                      | 0.339 | 4q21    |
| 164518930 | SDK1        | sidekick cell adhesion molecule 1                    | 0.347 | 12q11   |
| 157820017 | FBXO33      | F-box protein 33                                     | 0.359 | 6q23    |
| 672031398 | ANKRD1<br>1 | ankyrin repeat domain 11                             | 0.367 | 19q12   |
| 564328896 | CHD2        | chromodomain helicase DNA binding protein 2          | 0.370 | 1q31    |
| 672061705 | KMT2A       | lysine methyltransferase 2A                          | 0.372 | 8q22    |
| 157817845 | KMT5B       | lysine methyltransferase 5B                          | 0.374 | 1q43    |
| 62078501  | TTI2        | TELO2 interacting protein 2                          | 0.376 | 16q12.3 |
| 564333605 | BTA1F1      | B-TFIID TATA-box binding protein associated factor 1 | 0.392 | 1q53    |
| 40789237  | PCDHA4      | protocadherin alpha 4                                | 0.398 | 18p11   |
| 11560016  | HTR1B       | 5-hydroxytryptamine receptor 1B                      | 0.402 | 8q31    |
| 149016466 | NIPBL       | NIPBL, cohesin loading factor                        | 0.407 | 2q16    |
| 148747270 | PTGS2       | prostaglandin-endoperoxide synthase 2                | 0.408 | 13q21   |
| 157817845 | KMT5B       | lysine methyltransferase 5B                          | 0.413 | 1q43    |
| 16758574  | CNTN5       | contactin 5                                          | 0.414 | 8q11    |
| 40789237  | PCDHA4      | protocadherin alpha 4                                | 0.419 | 18p11   |
| 293348214 | CCDC88C     | coiled-coil domain containing 88C                    | 0.421 | 6q32    |
| 568940286 | BRAF        | B-Raf proto-oncogene, serine/threonine kinase        | 0.444 | 4q22    |
| 31543579  | RELN        | reelin                                               | 0.461 | 4q11    |
| 672061705 | KMT2A       | lysine methyltransferase 2A                          | 0.498 | 8q22    |
| 11560065  | GPR85       | G protein-coupled receptor 85                        | 0.502 | 4q21    |
| 564315667 | CLASP1      | cytoplasmic linker associated protein 1              | 0.555 | 13q11   |
| 62078501  | TTI2        | TELO2 interacting protein 2                          | 0.561 | 16q12.3 |
| 13928942  | PER2        | period circadian regulator 2                         | 0.562 | 9q36    |
| 157822673 | HS3ST5      | heparan sulfate-glucosamine 3-sulfotransferase 5     | 0.577 | 20q12   |
| 564315183 | CUX1        | cut like homeobox 1                                  | 0.585 | 12q12   |
| 672066092 | UNC80       | unc-80 homolog, NALCN channel complex subunit        | 0.589 | 9q32    |
| 564303143 | KMT2C       | lysine methyltransferase 2C                          | 0.593 | 4q11    |
| 13928942  | PER2        | period circadian regulator 2                         | 0.600 | 9q36    |
| 148689488 | SYN3        | synapsin III                                         | 0.627 | 7q13    |
| 28972363  | DOCK4       | dedicator of cytokinesis 4                           | 0.647 | 6q21    |
| 564327667 | TSHZ3       | teashirt zinc finger homeobox 3                      | 0.664 | 1q21    |

|           |          |                                                                    |       |         |
|-----------|----------|--------------------------------------------------------------------|-------|---------|
| 149058952 | MEF2C    | myocyte enhancer factor 2C                                         | 0.716 | 2q11    |
| 564389875 | ARHGEF10 | Rho guanine nucleotide exchange factor 10                          | 0.734 | 16q12.5 |
| 20302047  | AMPD1    | adenosine monophosphate deaminase 1                                | 0.737 | 2q34    |
| 564315183 | CUX1     | cut like homeobox 1                                                | 0.748 | 12q12   |
| 755566692 | HUWE1    | HECT, UBA and WWE domain containing 1, E3 ubiquitin protein ligase | 0.787 | Xq13    |
| 300795362 | PTCHD1   | patched domain containing 1                                        | 0.820 | Xq21    |
| 157818841 | POGZ     | pogo transposable element derived with ZNF domain                  | 0.842 | 2q34    |
| 392332010 | SLC38A10 | solute carrier family 38 member 10                                 | 0.955 | 10q32.3 |
| 755515866 | BRAF     | B-Raf proto-oncogene, serine/threonine kinase                      | 0.990 | 4q22    |
| 564303143 | KMT2C    | lysine methyltransferase 2C                                        | 0.997 | 4q11    |
| 672061705 | KMT2A    | lysine methyltransferase 2A                                        | 1.003 | 8q22    |
| 149058952 | MEF2C    | myocyte enhancer factor 2C                                         | 1.126 | 2q11    |
| 12083683  | SRD5A2   | steroid 5 alpha-reductase 2                                        | 1.128 | 6q14    |
| 755566692 | HUWE1    | HECT, UBA and WWE domain containing 1, E3 ubiquitin protein ligase | 1.130 | Xq13    |
| 157787081 | WNT1     | Wnt family member 1                                                | 1.222 | 7q36    |
| 293348214 | CCDC88C  | coiled-coil domain containing 88C                                  | 1.293 | 6q32    |
| 755566690 | HUWE1    | HECT, UBA and WWE domain containing 1, E3 ubiquitin protein ligase | 1.299 | Xq13    |
| 106879208 | MYH4     | myosin heavy chain 4                                               | 1.415 | 10q24   |
| 564329918 | EMSY     | EMSY, BRCA2 interacting transcriptional repressor                  | 1.449 | 1q32    |
| 568972665 | TSPOAP1  | TSPO associated protein 1                                          | 1.480 | 10q26   |
| 155369646 | AGBL4    | ATP/GTP binding protein like 4                                     | 1.510 | 5q35    |
| 24308466  | ITGB3    | integrin subunit beta 3                                            | 1.596 | 10q32.1 |
| 575403049 | ERBIN    | erbb2 interacting protein                                          | 1.596 | 2q12    |
| 568990288 | NIPBL    | NIPBL, cohesin loading factor                                      | 1.663 | 2q16    |
| 755566690 | HUWE1    | HECT, UBA and WWE domain containing 1, E3 ubiquitin protein ligase | 1.675 | Xq13    |
| 157817658 | VIL1     | villin 1                                                           | 1.700 | 9q33    |
| 564329926 | EMSY     | EMSY, BRCA2 interacting transcriptional repressor                  | 1.703 | 1q32    |
| 568990288 | NIPBL    | NIPBL, cohesin loading factor                                      | 1.705 | 2q16    |

|           |          |                                                                                                 |        |         |
|-----------|----------|-------------------------------------------------------------------------------------------------|--------|---------|
| 564329926 | EMSY     | EMSY, BRCA2 interacting transcriptional repressor                                               | 2.094  | 1q32    |
| 109480102 | SMARCC2  | SWI/SNF related, matrix associated, actin dependent regulator of chromatin subfamily c member 2 | 2.178  | 7q11    |
| 564329920 | EMSY     | EMSY, BRCA2 interacting transcriptional repressor                                               | 2.185  | 1q32    |
| 392342157 | PHIP     | pleckstrin homology domain interacting protein                                                  | 2.226  | 8q31    |
| 564303135 | KMT2C    | lysine methyltransferase 2C                                                                     | 2.505  | 4q11    |
| 564329920 | EMSY     | EMSY, BRCA2 interacting transcriptional repressor                                               | 2.899  | 1q32    |
| 564329920 | EMSY     | EMSY, BRCA2 interacting transcriptional repressor                                               | 3.112  | 1q32    |
| 672048712 | KMT2C    | lysine methyltransferase 2C                                                                     | 3.209  | 4q11    |
| 564392795 | MOCOS    | molybdenum cofactor sulfurase                                                                   | 3.248  | 18p12   |
| 11024666  | NTRK1    | neurotrophic receptor tyrosine kinase 1                                                         | 4.285  | 2q34    |
| 568906591 | UNC80    | unc-80 homolog, NALCN channel complex subunit                                                   | 4.755  | 9q32    |
| 392333013 | CEP135   | centrosomal protein 135                                                                         | 4.858  | 14p11   |
| 8394516   | PLAUR    | plasminogen activator, urokinase receptor                                                       | 5.229  | 1q21    |
| 564303143 | KMT2C    | lysine methyltransferase 2C                                                                     | 5.322  | 4q11    |
| 564329918 | EMSY     | EMSY, BRCA2 interacting transcriptional repressor                                               | 5.476  | 1q32    |
| 564315188 | CUX1     | cut like homeobox 1                                                                             | 6.267  | 12q12   |
| 564313845 | SLC38A10 | solute carrier family 38 member 10                                                              | 6.807  | 10q32.3 |
| 755566690 | HUWE1    | HECT, UBA and WWE domain containing 1, E3 ubiquitin protein ligase                              | 7.555  | Xq13    |
| 564329920 | EMSY     | EMSY, BRCA2 interacting transcriptional repressor                                               | 7.728  | 1q32    |
| 109472884 | UBE3C    | ubiquitin protein ligase E3C                                                                    | 8.197  | 4q11    |
| 109472884 | UBE3C    | ubiquitin protein ligase E3C                                                                    | 8.238  | 4q11    |
| 755566692 | HUWE1    | HECT, UBA and WWE domain containing 1, E3 ubiquitin protein ligase                              | 8.326  | Xq13    |
| 109480102 | SMARCC2  | SWI/SNF related, matrix associated, actin dependent regulator of chromatin subfamily c member 2 | 10.050 | 7q11    |

**ASD-related DEGs in male**

| <b>ID</b> | <b>Symbol</b> | <b>Entrez Gene Name</b>                                            | <b>Expr Log Ratio</b> | <b>Chromosome Location</b> |
|-----------|---------------|--------------------------------------------------------------------|-----------------------|----------------------------|
| 50510463  | PRUNE2        | prune homolog 2                                                    | -8.443                | 1q51                       |
| 672035060 | CIC           | capicua transcriptional repressor                                  | -8.114                | 1q21                       |
| 755566690 | HUWE1         | HECT, UBA and WWE domain containing 1, E3 ubiquitin protein ligase | -7.864                | Xq13                       |
| 226698394 | UNC80         | unc-80 homolog, NALCN channel complex subunit                      | -7.349                | 9q32                       |
| 564315185 | CUX1          | cut like homeobox 1                                                | -7.209                | 12q12                      |
| 564303135 | KMT2C         | lysine methyltransferase 2C                                        | -6.870                | 4q11                       |
| 564318843 | PSD3          | pleckstrin and Sec7 domain containing 3                            | -6.248                | 16p14                      |
| 149065087 | CADPS2        | calcium dependent secretion activator 2                            | -5.883                | 4q22                       |
| 564329920 | EMSY          | EMSY, BRCA2 interacting transcriptional repressor                  | -5.585                | 1q32                       |
| 148668227 | GPC6          | glypican 6                                                         | -5.248                | 15q24                      |
| 672066092 | UNC80         | unc-80 homolog, NALCN channel complex subunit                      | -4.954                | 9q32                       |
| 564329926 | EMSY          | EMSY, BRCA2 interacting transcriptional repressor                  | -4.655                | 1q32                       |
| 392334411 | ANKRD1<br>1   | ankyrin repeat domain 11                                           | -4.358                | 19q12                      |
| 54019438  | PCDHAC<br>1   | protocadherin alpha subfamily C, 1                                 | -3.170                | 18p11                      |
| 747019224 | SRCAP         | Snf2 related CREBBP activator protein                              | -2.874                | 1q37                       |
| 124486586 | AUTS2         | AUTS2, activator of transcription and developmental regulator      | -2.742                | 12q12                      |
| 564303143 | KMT2C         | lysine methyltransferase 2C                                        | -2.497                | 4q11                       |
| 755566692 | HUWE1         | HECT, UBA and WWE domain containing 1, E3 ubiquitin protein ligase | -2.222                | Xq13                       |
| 755566692 | HUWE1         | HECT, UBA and WWE domain containing 1, E3 ubiquitin protein ligase | -1.410                | Xq13                       |
| 672061705 | KMT2A         | lysine methyltransferase 2A                                        | -1.326                | 8q22                       |
| 293358436 | FOXP2         | forkhead box P2                                                    | -1.322                | 4q21                       |
| 564329920 | EMSY          | EMSY, BRCA2 interacting transcriptional repressor                  | -1.275                | 1q32                       |
| 157787062 | GRID2IP       | Grid2 interacting protein                                          | -1.260                | 12p11                      |
| 672012705 | SYNE1         | spectrin repeat containing nuclear envelope protein 1              | -1.120                | 1q11                       |

|           |          |                                                                                                 |        |         |
|-----------|----------|-------------------------------------------------------------------------------------------------|--------|---------|
| 38322763  | WNT2     | Wnt family member 2                                                                             | -0.943 | 4q21    |
| 564329916 | EMSY     | EMSY, BRCA2 interacting transcriptional repressor                                               | -0.864 | 1q32    |
| 46485412  | ABCA7    | ATP binding cassette subfamily A member 7                                                       | -0.798 | 7q11    |
| 672012431 | SASH1    | SAM and SH3 domain containing 1                                                                 | -0.756 | 1p13    |
| 157819949 | ITGA4    | integrin subunit alpha 4                                                                        | -0.748 | 3q24    |
| 157824208 | NTNG1    | netrin G1                                                                                       | -0.737 | 2q41    |
| 149062990 | CUX1     | cut like homeobox 1                                                                             | -0.682 | 12q12   |
| 12083595  | GRM4     | glutamate metabotropic receptor 4                                                               | -0.653 | 20p12   |
| 149053793 | TSPOAP1  | TSPO associated protein 1                                                                       | -0.627 | 10q26   |
| 110347493 | PCDHA9   | protocadherin alpha 9                                                                           | -0.587 | 18p11   |
| 672035060 | CIC      | capicua transcriptional repressor                                                               | -0.579 | 1q21    |
| 564313842 | SLC38A10 | solute carrier family 38 member 10                                                              | -0.503 | 10q32.3 |
| 672022667 | ARHGAP32 | Rho GTPase activating protein 32                                                                | -0.502 | 8q21    |
| 62543507  | CIB2     | calcium and integrin binding family member 2                                                    | -0.493 | 8q24    |
| 78126167  | SLC1A2   | solute carrier family 1 member 2                                                                | -0.445 | 3q32    |
| 51854227  | GSN      | gelsolin                                                                                        | -0.431 | 3p11    |
| 451172073 | CHRM3    | cholinergic receptor muscarinic 3                                                               | -0.399 | 17q12.1 |
| 13591949  | GATM     | glycine amidinotransferase                                                                      | -0.365 | 3q35    |
| 449784888 | ALDH5A1  | aldehyde dehydrogenase 5 family member A1                                                       | -0.363 | 17p11   |
| 38322759  | MET      | MET proto-oncogene, receptor tyrosine kinase                                                    | -0.354 | 4q21    |
| 197927216 | TBC1D5   | TBC1 domain family member 5                                                                     | -0.351 | 9q11    |
| 755566690 | HUWE1    | HECT, UBA and WWE domain containing 1, E3 ubiquitin protein ligase                              | -0.351 | Xq13    |
| 122065191 | ABAT     | 4-aminobutyrate aminotransferase                                                                | -0.348 | 10q12   |
| 6981208   | NR3C2    | nuclear receptor subfamily 3 group C member 2                                                   | -0.328 | 19q11   |
| 564310645 | PLXNB1   | plexin B1                                                                                       | -0.315 | 8q32    |
| 13994179  | SLC24A2  | solute carrier family 24 member 2                                                               | -0.310 | 5q32    |
| 6981168   | LPL      | lipoprotein lipase                                                                              | -0.308 | 16p14   |
| 109480098 | SMARCC2  | SWI/SNF related, matrix associated, actin dependent regulator of chromatin subfamily c member 2 | -0.307 | 7q11    |
| 564318875 | PSD3     | pleckstrin and Sec7 domain containing 3                                                         | -0.286 | 16p14   |
| 28972652  | SLC12A5  | solute carrier family 12 member 5                                                               | -0.285 | 3q42    |
| 50356003  | SCP2     | sterol carrier protein 2                                                                        | -0.284 | 5q34    |

|           |          |                                                                    |        |         |
|-----------|----------|--------------------------------------------------------------------|--------|---------|
| 61556829  | RIT2     | Ras like without CAAX 2                                            | -0.283 | 18p12   |
| 564394868 | CC2D1A   | coiled-coil and C2 domain containing 1A                            | -0.273 | 19q11   |
| 157820049 | LRFN5    | leucine rich repeat and fibronectin type III domain containing 5   | -0.271 | 6q23    |
| 148678721 | SOX5     | SRY-box 5                                                          | -0.265 | 4q44    |
| 115292425 | KIRREL3  | kirre like nephrin family adhesion molecule 3                      | -0.263 | 8q21    |
| 747019224 | SRCAP    | Snf2 related CREBBP activator protein                              | -0.258 | 1q37    |
| 3043568   | IQSEC2   | IQ motif and Sec7 domain 2                                         | -0.253 | Xq13    |
| 157817710 | FER      | FER tyrosine kinase                                                | -0.251 | 9q37    |
| 300795140 | TAF1     | TATA-box binding protein associated factor 1                       | -0.248 | Xq22    |
| 158749644 | MCM6     | minichromosome maintenance complex component 6                     | -0.247 | 13q13   |
| 77627981  | SHANK1   | SH3 and multiple ankyrin repeat domains 1                          | -0.233 | 1q22    |
| 19705535  | PACS1    | phosphofurin acidic cluster sorting protein 1                      | -0.220 | 1q43    |
| 54312094  | DAGLA    | diacylglycerol lipase alpha                                        | -0.218 | 1q43    |
| 11560055  | KHDRBS3  | KH RNA binding domain containing, signal transduction associated 3 | -0.217 | 7q34    |
| 157817839 | SEMA5A   | semaphorin 5A                                                      | -0.212 | 2q22    |
| 149023410 | SNAP25   | synaptosome associated protein 25                                  | -0.209 | 3q36    |
| 149015822 | SLC9A6   | solute carrier family 9 member A6                                  | -0.209 | Xq37    |
| 39104626  | CAMK2A   | calcium/calmodulin dependent protein kinase II alpha               | -0.206 | 18q12.1 |
| 672036086 | ARHGAP33 | Rho GTPase activating protein 33                                   | -0.205 | 1q21    |
| 71896543  | SHANK3   | SH3 and multiple ankyrin repeat domains 3                          | -0.204 | 7q34    |
| 8393490   | GRM5     | glutamate metabotropic receptor 5                                  | -0.203 | 1q32    |
| 59858990  | UNC13A   | unc-13 homolog A                                                   | -0.199 | 16p14   |
| 109472884 | UBE3C    | ubiquitin protein ligase E3C                                       | -0.198 | 4q11    |
| 13592131  | DGKZ     | diacylglycerol kinase zeta                                         | -0.197 | 3q24    |
| 672040941 | ATRNL1   | attractin like 1                                                   | -0.196 | 1q55    |
| 56605990  | LRPPRC   | leucine rich pentatricopeptide repeat containing                   | -0.194 | 6q12    |
| 38454208  | KCTD13   | potassium channel tetramerization domain containing 13             | -0.193 | 1q37    |
| 148695758 | CAPRIN1  | cell cycle associated protein 1                                    | -0.188 | 3q32    |
| 8394328   | SOD1     | superoxide dismutase 1                                             | -0.184 | 11q11   |



|           |         |                                                                     |        |       |
|-----------|---------|---------------------------------------------------------------------|--------|-------|
| 259155312 | AGAP2   | ArfGAP with GTPase domain, ankyrin repeat and PH domain 2           | -0.184 | 7q22  |
| 83267872  | ADNP    | activity dependent neuroprotector homeobox                          | -0.183 | 3q42  |
| 148692349 | ATP1A3  | ATPase Na <sup>+</sup> /K <sup>+</sup> transporting subunit alpha 3 | -0.181 | 1q21  |
| 257796229 | SYNGAP1 | synaptic Ras GTPase activating protein 1                            | -0.181 | 20p12 |
| 9665227   | DLG4    | discs large MAGUK scaffold protein 4                                | -0.170 | 10q24 |
| 77404395  | SND1    | staphylococcal nuclease and tudor domain containing 1               | -0.165 | 4q22  |
| 148673176 | FABP7   | fatty acid binding protein 7                                        | -0.158 | 20q12 |
| 37359962  | PLPPR4  | phospholipid phosphatase related 4                                  | -0.157 | 2q41  |
| 97537309  | SYNJ1   | synaptojanin 1                                                      | -0.152 | 11q11 |
| 564394830 | NACC1   | nucleus accumbens associated 1                                      | -0.145 | 19q11 |
| 187469796 | MBD3    | methyl-CpG binding domain protein 3                                 | -0.145 | 7q11  |
| 815891312 | CACNA1G | calcium voltage-gated channel subunit alpha1 G                      | -0.142 | 10q26 |
| 40254595  | DPYSL2  | dihydropyrimidinase like 2                                          | -0.141 | 15p12 |
| 407728599 | CTNND2  | catenin delta 2                                                     | -0.129 | 2q22  |
| 25453410  | CACNA1B | calcium voltage-gated channel subunit alpha1 B                      | -0.128 | 3p13  |
| 254028210 | CMIP    | c-Maf inducing protein                                              | -0.125 | 19q12 |
| 253683488 | NTRK2   | neurotrophic receptor tyrosine kinase 2                             | -0.124 | 17p14 |
| 68534276  | NSMCE3  | NSE3 homolog, SMC5-SMC6 complex component                           | -0.117 | 1q22  |
| 148747541 | HNRNPU  | heterogeneous nuclear ribonucleoprotein U                           | -0.109 | 13q25 |
| 149025239 | VASH1   | vasohibin 1                                                         | -0.088 | 6q31  |
| 148747194 | SLC16A7 | solute carrier family 16 member 7                                   | -0.080 | 7q22  |
| 29789269  | GRIA1   | glutamate ionotropic receptor AMPA type subunit 1                   | -0.052 | 10q22 |
| 568931380 | CHD5    | chromodomain helicase DNA binding protein 5                         | -0.036 | 5q36  |
| 6978673   | CNR1    | cannabinoid receptor 1                                              | -0.023 | 5q21  |
| 16758706  | NRXN2   | neurexin 2                                                          | 0.005  | 1q43  |
| 83267872  | ADNP    | activity dependent neuroprotector homeobox                          | 0.123  | 3q42  |
| 564390508 | NSD1    | nuclear receptor binding SET domain protein 1                       | 0.128  | 17p14 |

|           |         |                                                                       |       |         |
|-----------|---------|-----------------------------------------------------------------------|-------|---------|
| 300795060 | SRGAP3  | SLIT-ROBO Rho GTPase activating protein 3                             | 0.128 | 4q42    |
| 115312278 | MECP2   | methyl-CpG binding protein 2                                          | 0.135 | Xq37    |
| 672055431 | SPAST   | spastin                                                               | 0.138 | 6q13    |
| 171543899 | PLXNA4  | plexin A4                                                             | 0.139 | 4q22    |
| 924859455 | NEXMIF  | neurite extension and migration factor                                | 0.139 | Xq22    |
| 157819885 | SETD5   | SET domain containing 5                                               | 0.144 | 4q42    |
| 404312698 | CASC4   | cancer susceptibility 4                                               | 0.150 | 3q35    |
| 728864372 | WDFY3   | WD repeat and FYVE domain containing 3                                | 0.153 | 14p22   |
| 59709464  | PIK3R2  | phosphoinositide-3-kinase regulatory subunit 2                        | 0.159 | 16p14   |
| 167555091 | CTTNBP2 | cortactin binding protein 2                                           | 0.159 | 4q21    |
| 300793740 | TANC2   | tetratricopeptide repeat, ankyrin repeat and coiled-coil containing 2 | 0.160 | 10q32.1 |
| 10720132  | NEO1    | neogenin 1                                                            | 0.164 | 8q24    |
| 24418849  | KCNB1   | potassium voltage-gated channel subfamily B member 1                  | 0.167 | 3q42    |
| 564327171 | ACTN4   | actinin alpha 4                                                       | 0.170 | 1q21    |
| 408387590 | TRIP12  | thyroid hormone receptor interactor 12                                | 0.176 | 9q35    |
| 6978787   | DYRK1A  | dual specificity tyrosine phosphorylation regulated kinase 1A         | 0.179 | 11q11   |
| 148698133 | AHDC1   | AT-hook DNA binding motif containing 1                                | 0.180 | 5q36    |
| 157821015 | KDM5B   | lysine demethylase 5B                                                 | 0.182 | 13q13   |
| 149026331 | SRSF11  | serine and arginine rich splicing factor 11                           | 0.185 | 2q45    |
| 42627759  | SMC3    | structural maintenance of chromosomes 3                               | 0.186 | 1q55    |
| 404351649 | CDK13   | cyclin dependent kinase 13                                            | 0.191 | 17q11   |
| 157820255 | MED13   | mediator complex subunit 13                                           | 0.196 | 10q26   |
| 119616373 | MEF2C   | myocyte enhancer factor 2C                                            | 0.200 | 2q11    |
| 291042494 | MED13L  | mediator complex subunit 13 like                                      | 0.202 | 12q16   |
| 672042964 | ASH1L   | ASH1 like histone lysine methyltransferase                            | 0.203 | 2q34    |
| 29789299  | XPO1    | exportin 1                                                            | 0.204 | 14q22   |
| 425384    | CAMK4   | calcium/calmodulin dependent protein kinase IV                        | 0.207 | 18p12   |
| 6981264   | NF1     | neurofibromin 1                                                       | 0.213 | 10q25   |
| 19705483  | CLSTN2  | calsyntenin 2                                                         | 0.214 | 8q31    |
| 62088168  | ELAVL2  | ELAV like RNA binding protein 2                                       | 0.216 | 5q32    |

|           |         |                                                      |       |          |
|-----------|---------|------------------------------------------------------|-------|----------|
| 564386027 | CHD8    | chromodomain helicase DNA binding protein 8          | 0.219 | 15p14    |
| 2804296   | CDH8    | cadherin 8                                           | 0.221 | 19p13    |
| 928135679 | GAN     | gigaxonin                                            | 0.222 | 19q12    |
| 564361244 | TCF20   | transcription factor 20                              | 0.222 | 7q34     |
| 148491097 | DYNC1H1 | dynein cytoplasmic 1 heavy chain 1                   | 0.225 | 6q32     |
| 13540699  | NRP2    | neuropilin 2                                         | 0.226 | 9q32     |
| 157819605 | EPC2    | enhancer of polycomb homolog 2                       | 0.227 | 3q12     |
| 392348740 | LAMB1   | laminin subunit beta 1                               | 0.228 | 6q16     |
| 403420604 | PCDH11X | protocadherin 11 X-linked                            | 0.228 | Xq31     |
| 11177894  | TSC1    | TSC complex subunit 1                                | 0.230 | 3p12     |
| 17864836  | CACNA1C | calcium voltage-gated channel subunit alpha1 C       | 0.230 | 4q42     |
| 157817961 | PHF3    | PHD finger protein 3                                 | 0.230 | 9q21     |
| 145553966 | CACNA1E | calcium voltage-gated channel subunit alpha1 E       | 0.231 | 13q21    |
| 213972547 | KAT6A   | lysine acetyltransferase 6A                          | 0.236 | 16q12.5  |
| 2266994   | OGT     | O-linked N-acetylglucosamine (GlcNAc) transferase    | 0.238 | Xq22     |
| 14091754  | GRIP1   | glutamate receptor interacting protein 1             | 0.239 | 7q22     |
| 403310691 | RAI1    | retinoic acid induced 1                              | 0.242 | 10q22    |
| 300797458 | UBE3A   | ubiquitin protein ligase E3A                         | 0.243 | 1q22     |
| 148697254 | TBL1X   | transducin beta like 1 X-linked                      | 0.243 | Xq21     |
| 672022994 | NEO1    | neogenin 1                                           | 0.248 | 8q24     |
| 290560930 | CREBBP  | CREB binding protein                                 | 0.255 | 10q12    |
| 157818967 | KDM6B   | lysine demethylase 6B                                | 0.258 | 10q24    |
| 403310664 | KMT2E   | lysine methyltransferase 2E                          | 0.263 | 4q11     |
| 157820313 | GIGYF1  | GRB10 interacting GYF protein 1                      | 0.265 | 12q12    |
| 9506755   | GRIK2   | glutamate ionotropic receptor kainate type subunit 2 | 0.274 | 20q13    |
| 11067415  | ERBB4   | erb-b2 receptor tyrosine kinase 4                    | 0.283 | 9q32-q33 |
| 149060466 | ZBTB20  | zinc finger and BTB domain containing 20             | 0.293 | 11q21    |
| 13929168  | FAT1    | FAT atypical cadherin 1                              | 0.305 | 16q11    |
| 157818041 | YEATS2  | YEATS domain containing 2                            | 0.309 | 11q23    |
| 672035060 | CIC     | capicua transcriptional repressor                    | 0.325 | 1q21     |
| 149050659 | BIRC6   | baculoviral IAP repeat containing 6                  | 0.331 | 6q13     |
| 564303143 | KMT2C   | lysine methyltransferase 2C                          | 0.336 | 4q11     |
| 29612542  | H2AFZ   | H2A histone family member Z                          | 0.337 | 2q44     |
| 51871603  | ST7     | suppression of tumorigenicity 7                      | 0.339 | 4q21     |
| 198041672 | TNRC6B  | trinucleotide repeat containing 6B                   | 0.345 | 7q34     |

|           |              |                                                                    |       |         |
|-----------|--------------|--------------------------------------------------------------------|-------|---------|
| 149027091 | GABRA3       | gamma-aminobutyric acid type A receptor alpha3 subunit             | 0.357 | Xq37    |
| 109467304 | TRIM33       | tripartite motif containing 33                                     | 0.363 | 2q34    |
| 564310645 | PLXNB1       | plexin B1                                                          | 0.364 | 8q32    |
| 672031398 | ANKRD1<br>1  | ankyrin repeat domain 11                                           | 0.367 | 19q12   |
| 564328896 | CHD2         | chromodomain helicase DNA binding protein 2                        | 0.370 | 1q31    |
| 672061705 | KMT2A        | lysine methyltransferase 2A                                        | 0.372 | 8q22    |
| 157817845 | KMT5B        | lysine methyltransferase 5B                                        | 0.374 | 1q43    |
| 564333605 | BTA1F1       | B-TFIID TATA-box binding protein associated factor 1               | 0.392 | 1q53    |
| 149016466 | NIPBL        | NIPBL, cohesin loading factor                                      | 0.407 | 2q16    |
| 40789237  | PCDHA4       | protocadherin alpha 4                                              | 0.419 | 18p11   |
| 392353586 | INTS6        | integrator complex subunit 6                                       | 0.427 | 15p12   |
| 568940286 | BRAF         | B-Raf proto-oncogene, serine/threonine kinase                      | 0.444 | 4q22    |
| 148705863 | GABRA4       | gamma-aminobutyric acid type A receptor alpha4 subunit             | 0.450 | 14p11   |
| 31543579  | RELN         | reelin                                                             | 0.461 | 4q11    |
| 672087275 | KDM5C        | lysine demethylase 5C                                              | 0.558 | Xq13    |
| 62078501  | TTI2         | TELO2 interacting protein 2                                        | 0.561 | 16q12.3 |
| 209364558 | CEP290       | centrosomal protein 290                                            | 0.563 | 7q13    |
| 672066092 | UNC80        | unc-80 homolog, NALCN channel complex subunit                      | 0.589 | 9q32    |
| 13928942  | PER2         | period circadian regulator 2                                       | 0.600 | 9q36    |
| 28972363  | DOCK4        | dedicator of cytokinesis 4                                         | 0.647 | 6q21    |
| 564315183 | CUX1         | cut like homeobox 1                                                | 0.748 | 12q12   |
| 157818841 | POGZ         | pogo transposable element derived with ZNF domain                  | 0.842 | 2q34    |
| 392332010 | SLC38A1<br>0 | solute carrier family 38 member 10                                 | 0.955 | 10q32.3 |
| 564303143 | KMT2C        | lysine methyltransferase 2C                                        | 0.997 | 4q11    |
| 672061705 | KMT2A        | lysine methyltransferase 2A                                        | 1.003 | 8q22    |
| 747019224 | SRCAP        | Snf2 related CREBBP activator protein                              | 1.107 | 1q37    |
| 149058952 | MEF2C        | myocyte enhancer factor 2C                                         | 1.126 | 2q11    |
| 755566692 | HUWE1        | HECT, UBA and WWE domain containing 1, E3 ubiquitin protein ligase | 1.130 | Xq13    |
| 157822425 | MFRP         | membrane frizzled-related protein                                  | 1.264 | 8q22    |
| 293348214 | CCDC88C      | coiled-coil domain containing 88C                                  | 1.293 | 6q32    |

| 755566690                         | HUWE1         | HECT, UBA and WWE domain containing 1, E3 ubiquitin protein ligase                              | 1.299                 | Xq13                       |
|-----------------------------------|---------------|-------------------------------------------------------------------------------------------------|-----------------------|----------------------------|
| 149016805                         | PSD3          | pleckstrin and Sec7 domain containing 3                                                         | 1.318                 | 16p14                      |
| 672087275                         | KDM5C         | lysine demethylase 5C                                                                           | 1.411                 | Xq13                       |
| 568972665                         | TSPOAP1       | TSPO associated protein 1                                                                       | 1.480                 | 10q26                      |
| 568990288                         | NIPBL         | NIPBL, cohesin loading factor                                                                   | 1.663                 | 2q16                       |
| 755566690                         | HUWE1         | HECT, UBA and WWE domain containing 1, E3 ubiquitin protein ligase                              | 1.675                 | Xq13                       |
| 564329926                         | EMSY          | EMSY, BRCA2 interacting transcriptional repressor                                               | 1.703                 | 1q32                       |
| 50510463                          | PRUNE2        | prune homolog 2                                                                                 | 2.470                 | 1q51                       |
| 564303135                         | KMT2C         | lysine methyltransferase 2C                                                                     | 2.505                 | 4q11                       |
| 564329920                         | EMSY          | EMSY, BRCA2 interacting transcriptional repressor                                               | 2.899                 | 1q32                       |
| 672048712                         | KMT2C         | lysine methyltransferase 2C                                                                     | 3.209                 | 4q11                       |
| 568906591                         | UNC80         | unc-80 homolog, NALCN channel complex subunit                                                   | 4.755                 | 9q32                       |
| 564303143                         | KMT2C         | lysine methyltransferase 2C                                                                     | 5.322                 | 4q11                       |
| 564329918                         | EMSY          | EMSY, BRCA2 interacting transcriptional repressor                                               | 5.476                 | 1q32                       |
| 564315188                         | CUX1          | cut like homeobox 1                                                                             | 6.267                 | 12q12                      |
| 564313845                         | SLC38A10      | solute carrier family 38 member 10                                                              | 6.807                 | 10q32.3                    |
| 755566690                         | HUWE1         | HECT, UBA and WWE domain containing 1, E3 ubiquitin protein ligase                              | 7.555                 | Xq13                       |
| 564329920                         | EMSY          | EMSY, BRCA2 interacting transcriptional repressor                                               | 7.728                 | 1q32                       |
| 109472884                         | UBE3C         | ubiquitin protein ligase E3C                                                                    | 8.238                 | 4q11                       |
| 755566692                         | HUWE1         | HECT, UBA and WWE domain containing 1, E3 ubiquitin protein ligase                              | 8.326                 | Xq13                       |
| 109480102                         | SMARCC2       | SWI/SNF related, matrix associated, actin dependent regulator of chromatin subfamily c member 2 | 10.050                | 7q11                       |
| <b>ASD-related DEGs in female</b> |               |                                                                                                 |                       |                            |
| <b>ID</b>                         | <b>Symbol</b> | <b>Entrez Gene Name</b>                                                                         | <b>Expr Log Ratio</b> | <b>Chromosome Location</b> |
| 755566690                         | HUWE1         | HECT, UBA and WWE domain containing 1, E3 ubiquitin protein ligase                              | -7.570                | Xq13                       |

|           |          |                                                                                                 |        |         |
|-----------|----------|-------------------------------------------------------------------------------------------------|--------|---------|
| 28972363  | DOCK4    | dedicator of cytokinesis 4                                                                      | -7.468 | 6q21    |
| 755566692 | HUWE1    | HECT, UBA and WWE domain containing 1, E3 ubiquitin protein ligase                              | -7.238 | Xq13    |
| 672065933 | DOCK10   | dedicator of cytokinesis 10                                                                     | -5.907 | 9q34    |
| 392332008 | SLC38A10 | solute carrier family 38 member 10                                                              | -5.672 | 10q32.3 |
| 564303143 | KMT2C    | lysine methyltransferase 2C                                                                     | -5.044 | 4q11    |
| 672035060 | CIC      | capicua transcriptional repressor                                                               | -3.861 | 1q21    |
| 564315188 | CUX1     | cut like homeobox 1                                                                             | -3.459 | 12q12   |
| 663434101 | CUX1     | cut like homeobox 1                                                                             | -3.222 | 12q12   |
| 274321177 | MCM4     | minichromosome maintenance complex component 4                                                  | -2.844 | 11q23   |
| 148689488 | SYN3     | synapsin III                                                                                    | -2.438 | 7q13    |
| 25742828  | SCN7A    | sodium voltage-gated channel alpha subunit 7                                                    | -2.202 | 3q21    |
| 158186711 | F13A1    | coagulation factor XIII A chain                                                                 | -1.886 | 17p12   |
| 55741827  | TERT     | telomerase reverse transcriptase                                                                | -1.801 | 1p11    |
| 149053793 | TSPOAP1  | TSPO associated protein 1                                                                       | -1.659 | 10q26   |
| 109480098 | SMARCC2  | SWI/SNF related, matrix associated, actin dependent regulator of chromatin subfamily c member 2 | -1.490 | 7q11    |
| 768033504 | KDM6A    | lysine demethylase 6A                                                                           | -1.442 | Xq11    |
| 564325156 | SYNE1    | spectrin repeat containing nuclear envelope protein 1                                           | -1.323 | 1q11    |
| 25742776  | MC4R     | melanocortin 4 receptor                                                                         | -1.309 | 18q12.1 |
| 672066092 | UNC80    | unc-80 homolog, NALCN activator                                                                 | -1.273 | 9q32    |
| 13591940  | DPYD     | dihydropyrimidine dehydrogenase                                                                 | -1.272 | 2q41    |
| 672061705 | KMT2A    | lysine methyltransferase 2A                                                                     | -1.236 | 8q22    |
| 6978773   | DPP4     | dipeptidyl peptidase 4                                                                          | -1.161 | 3q21    |
| 392332010 | SLC38A10 | solute carrier family 38 member 10                                                              | -1.136 | 10q32.3 |
| 564389875 | ARHGEF10 | Rho guanine nucleotide exchange factor 10                                                       | -1.098 | 16q12.5 |
| 568977750 | DOCK4    | dedicator of cytokinesis 4                                                                      | -0.983 | 6q21    |
| 18959222  | SCN9A    | sodium voltage-gated channel alpha subunit 9                                                    | -0.968 | 3q21    |
| 149053793 | TSPOAP1  | TSPO associated protein 1                                                                       | -0.963 | 10q26   |
| 19424190  | CX3CR1   | C-X3-C motif chemokine receptor 1                                                               | -0.945 | 8q32    |
| 60360628  | ATP8A1   | ATPase phospholipid transporting 8A1                                                            | -0.941 | 14p11   |
| 157822365 | LAMC3    | laminin subunit gamma 3                                                                         | -0.930 | 3p12    |
| 198442871 | KANK1    | KN motif and ankyrin repeat domains 1                                                           | -0.897 | 1q51    |
| 672012705 | SYNE1    | spectrin repeat containing nuclear envelope protein 1                                           | -0.859 | 1q11    |

|           |          |                                                                    |        |         |
|-----------|----------|--------------------------------------------------------------------|--------|---------|
| 568940286 | BRAF     | B-Raf proto-oncogene, serine/threonine kinase                      | -0.852 | 4q22    |
| 406719604 | SLC9A9   | solute carrier family 9 member A9                                  | -0.851 | 8q31    |
| 755566692 | HUWE1    | HECT, UBA and WWE domain containing 1, E3 ubiquitin protein ligase | -0.837 | Xq13    |
| 11177892  | KCNT1    | potassium sodium-activated channel subfamily T member 1            | -0.833 | 3p13    |
| 672073969 | CLASP1   | cytoplasmic linker associated protein 1                            | -0.817 | 13q11   |
| 226698394 | UNC80    | unc-80 homolog, NALCN activator                                    | -0.814 | 9q32    |
| 755566682 | HUWE1    | HECT, UBA and WWE domain containing 1, E3 ubiquitin protein ligase | -0.788 | Xq13    |
| 67514566  | POLA2    | DNA polymerase alpha 2, accessory subunit                          | -0.780 | 1q43    |
| 19173756  | ERG      | ERG, ETS transcription factor                                      | -0.761 | 11q11   |
| 672041704 | NIPBL    | NIPBL, cohesin loading factor                                      | -0.760 | 2q16    |
| 108935976 | DISC1    | disrupted in schizophrenia 1                                       | -0.754 | 19q12   |
| 392332443 | PRKDC    | protein kinase, DNA-activated, catalytic polypeptide               | -0.697 | 11q23   |
| 149053793 | TSPOAP1  | TSPO associated protein 1                                          | -0.661 | 10q26   |
| 157823279 | CGNL1    | cingulin like 1                                                    | -0.645 | 8q24    |
| 564330609 | SYT17    | synaptotagmin 17                                                   | -0.639 | 1q35    |
| 392341425 | PTPRB    | protein tyrosine phosphatase, receptor type B                      | -0.637 | 7q22    |
| 18959236  | PECR     | peroxisomal trans-2-enoyl-CoA reductase                            | -0.629 | 9q33    |
| 77695926  | STAT1    | signal transducer and activator of transcription 1                 | -0.617 | 9q22    |
| 312147379 | LAMA1    | laminin subunit alpha 1                                            | -0.610 | 9q38    |
| 568956384 | ADAMTS18 | ADAM metallopeptidase with thrombospondin type 1 motif 18          | -0.604 | 19q12   |
| 25453410  | CACNA1B  | calcium voltage-gated channel subunit alpha1 B                     | -0.602 | 3p13    |
| 50510463  | PRUNE2   | prune homolog 2                                                    | -0.599 | 1q51    |
| 148747194 | SLC16A7  | solute carrier family 16 member 7                                  | -0.597 | 7q22    |
| 13562118  | LRP2     | LDL receptor related protein 2                                     | -0.589 | 3q21    |
| 348041395 | DLGAP2   | DLG associated protein 2                                           | -0.582 | 16q12.5 |
| 815891312 | CACNA1G  | calcium voltage-gated channel subunit alpha1 G                     | -0.561 | 10q26   |
| 16758138  | POMT1    | protein O-mannosyltransferase 1                                    | -0.560 | 3p12    |
| 149038513 | SYNE1    | spectrin repeat containing nuclear envelope protein 1              | -0.555 | 1q11    |

|           |          |                                                                    |        |         |
|-----------|----------|--------------------------------------------------------------------|--------|---------|
| 16758716  | CACNB2   | calcium voltage-gated channel auxiliary subunit beta 2             | -0.550 | 17q12.3 |
| 149060466 | ZBTB20   | zinc finger and BTB domain containing 20                           | -0.549 | 11q21   |
| 10242377  | GRIK4    | glutamate ionotropic receptor kainate type subunit 4               | -0.546 | 8q22    |
| 6978867   | GABRB1   | gamma-aminobutyric acid type A receptor beta1 subunit              | -0.536 | 14p11   |
| 157819687 | TUBGCP5  | tubulin gamma complex associated protein 5                         | -0.534 | 1q22    |
| 110347559 | PCDHA13  | protocadherin alpha 13                                             | -0.531 | 18p11   |
| 157824208 | NTNG1    | netrin G1                                                          | -0.528 | 2q41    |
| 13994179  | SLC24A2  | solute carrier family 24 member 2                                  | -0.524 | 5q32    |
| 219804406 | DOCK1    | dedicator of cytokinesis 1                                         | -0.519 | 1q41    |
| 28972652  | SLC12A5  | solute carrier family 12 member 5                                  | -0.519 | 3q42    |
| 149016805 | PSD3     | pleckstrin and Sec7 domain containing 3                            | -0.515 | 16p14   |
| 18959266  | KHDRBS2  | KH RNA binding domain containing, signal transduction associated 2 | -0.513 | 9q21    |
| 55741540  | KATNAL1  | katanin catalytic subunit A1 like 1                                | -0.505 | 12p11   |
| 392343941 | ZC3H4    | zinc finger CCCH-type containing 4                                 | -0.502 | 1q21    |
| 672035060 | CIC      | capicua transcriptional repressor                                  | -0.499 | 1q21    |
| 403420604 | PCDH11X  | protocadherin 11 X-linked                                          | -0.494 | Xq31    |
| 13027400  | GUCY1A2  | guanylate cyclase 1 soluble subunit alpha 2                        | -0.493 | 8q11    |
| 157817205 | USP45    | ubiquitin specific peptidase 45                                    | -0.492 | 5q21    |
| 6978789   | SPARCL1  | SPARC like 1                                                       | -0.491 | 14p22   |
| 13786142  | SLIT3    | slit guidance ligand 3                                             | -0.477 | 10q12   |
| 158508684 | BCAS1    | breast carcinoma amplified sequence 1                              | -0.474 | 3q42    |
| 51854227  | GSN      | gelsolin                                                           | -0.457 | 3p11    |
| 61557206  | ZBTB16   | zinc finger and BTB domain containing 16                           | -0.457 | 8q23    |
| 122065191 | ABAT     | 4-aminobutyrate aminotransferase                                   | -0.455 | 10q12   |
| 140971205 | GRIN2A   | glutamate ionotropic receptor NMDA type subunit 2A                 | -0.452 | 10q11   |
| 392342157 | PHIP     | pleckstrin homology domain interacting protein                     | -0.452 | 8q31    |
| 13591949  | GATM     | glycine amidinotransferase                                         | -0.451 | 3q35    |
| 201066395 | MBOAT7   | membrane bound O-acyltransferase domain containing 7               | -0.442 | 1q12    |
| 16758746  | CNTN4    | contactin 4                                                        | -0.442 | 4q41    |
| 157821397 | SLC22A15 | solute carrier family 22 member 15                                 | -0.432 | 2q34    |



|           |          |                                                                    |        |          |
|-----------|----------|--------------------------------------------------------------------|--------|----------|
| 300795140 | TAF1     | TATA-box binding protein associated factor 1                       | -0.426 | Xq22     |
| 47155563  | KIF13B   | kinesin family member 13B                                          | -0.423 | 15p12    |
| 11067415  | ERBB4    | erb-b2 receptor tyrosine kinase 4                                  | -0.420 | 9q32-q33 |
| 672012705 | SYNE1    | spectrin repeat containing nuclear envelope protein 1              | -0.419 | 1q11     |
| 672043401 | POGZ     | pogo transposable element derived with ZNF domain                  | -0.418 | 2q34     |
| 755566690 | HUWE1    | HECT, UBA and WWE domain containing 1, E3 ubiquitin protein ligase | -0.414 | Xq13     |
| 166999225 | GRM1     | glutamate metabotropic receptor 1                                  | -0.411 | 1p13     |
| 149066531 | VPS13B   | vacuolar protein sorting 13 homolog B                              | -0.406 | 7q22     |
| 12055542  | SLC25A27 | solute carrier family 25 member 27                                 | -0.400 | 9q13     |
| 13540699  | NRP2     | neuropilin 2                                                       | -0.399 | 9q32     |
| 149039557 | UTRN     | utrophin                                                           | -0.387 | 1p13     |
| 672087275 | KDM5C    | lysine demethylase 5C                                              | -0.386 | Xq13     |
| 145553966 | CACNA1E  | calcium voltage-gated channel subunit alpha1 E                     | -0.382 | 13q21    |
| 149039905 | TSPAN17  | tetraspanin 17                                                     | -0.371 | 17p14    |
| 6978673   | CNR1     | cannabinoid receptor 1                                             | -0.370 | 5q21     |
| 78126167  | SLC1A2   | solute carrier family 1 member 2                                   | -0.366 | 3q32     |
| 149020512 | PDE4A    | phosphodiesterase 4A                                               | -0.366 | 8q13     |
| 82617648  | CSMD1    | CUB and Sushi multiple domains 1                                   | -0.363 | 16q12.5  |
| 568977996 | PXDN     | peroxidasin                                                        | -0.362 | 6q16     |
| 392339847 | CADPS2   | calcium dependent secretion activator 2                            | -0.361 | 4q22     |
| 148667088 | ATP2B2   | ATPase plasma membrane Ca <sup>2+</sup> transporting 2             | -0.357 | 4q42     |
| 115292425 | KIRREL3  | kin of IRRE like 3 (Drosophila)                                    | -0.350 | 8q21     |
| 54019432  | PCDHA7   | protocadherin alpha 7                                              | -0.345 | 18p11    |
| 690969206 | MBD6     | methyl-CpG binding domain protein 6                                | -0.343 | 7q22     |
| 281306814 | RPS6KA2  | ribosomal protein S6 kinase A2                                     | -0.341 | 1q12     |
| 392348740 | LAMB1    | laminin subunit beta 1                                             | -0.325 | 6q16     |
| 157817476 | HECW2    | HECT, C2 and WW domain containing E3 ubiquitin protein ligase 2    | -0.325 | 9q31     |
| 8393490   | GRM5     | glutamate metabotropic receptor 5                                  | -0.324 | 1q32     |
| 564394868 | CC2D1A   | coiled-coil and C2 domain containing 1A                            | -0.324 | 19q11    |
| 194473622 | ADSL     | adenylosuccinate lyase                                             | -0.323 | 7q34     |
| 97537309  | SYNJ1    | synaptojanin 1                                                     | -0.321 | 11q11    |

|           |          |                                                       |        |         |
|-----------|----------|-------------------------------------------------------|--------|---------|
| 50511316  | AH11     | Abelson helper integration site 1                     | -0.316 | 1p12    |
| 67078434  | SLC25A39 | solute carrier family 25 member 39                    | -0.314 | 10q32.1 |
| 157818787 | BBS4     | Bardet-Biedl syndrome 4                               | -0.307 | 8q24    |
| 451172073 | CHRM3    | cholinergic receptor muscarinic 3                     | -0.304 | 17q12.1 |
| 149049163 | GRIN2B   | glutamate ionotropic receptor NMDA type subunit 2B    | -0.304 | 4q43    |
| 28972363  | DOCK4    | dedicator of cytokinesis 4                            | -0.304 | 6q21    |
| 564387864 | CACNA1D  | calcium voltage-gated channel subunit alpha1 D        | -0.299 | 16p16   |
| 59858990  | UNC13A   | unc-13 homolog A                                      | -0.299 | 16p14   |
| 270288740 | MAOA     | monoamine oxidase A                                   | -0.290 | Xq11    |
| 124486885 | LRRC7    | leucine rich repeat containing 7                      | -0.283 | 2q45    |
| 148689929 | CYFIP1   | cytoplasmic FMR1 interacting protein 1                | -0.281 | 1q22    |
| 672088848 | PLXNA3   | plexin A3                                             | -0.277 | Xq37    |
| 54312094  | DAGLA    | diacylglycerol lipase alpha                           | -0.276 | 1q43    |
| 672022994 | NEO1     | neogenin 1                                            | -0.275 | 8q24    |
| 145312274 | EPHA6    | EPH receptor A6                                       | -0.273 | 11q12   |
| 469469055 | KCNQ3    | potassium voltage-gated channel subfamily Q member 3  | -0.273 | 7q34    |
| 148695071 | STK39    | serine/threonine kinase 39                            | -0.271 | 3q21    |
| 12018268  | ADCY5    | adenylate cyclase 5                                   | -0.270 | 11q22   |
| 157818225 | CNTNAP4  | contactin associated protein like 4                   | -0.262 | 19q12   |
| 37359962  | PLPPR4   | phospholipid phosphatase related 4                    | -0.257 | 2q41    |
| 564388440 | MYO9B    | myosin IXB                                            | -0.254 | 16p14   |
| 148695758 | CAPRIN1  | cell cycle associated protein 1                       | -0.252 | 3q32    |
| 157817839 | SEMA5A   | semaphorin 5A                                         | -0.247 | 2q22    |
| 672040941 | ATRNL1   | attractin like 1                                      | -0.246 | 1q55    |
| 6981208   | NR3C2    | nuclear receptor subfamily 3 group C member 2         | -0.245 | 19q11   |
| 564327171 | ACTN4    | actinin alpha 4                                       | -0.243 | 1q21    |
| 33413429  | NTRK3    | neurotrophic receptor tyrosine kinase 3               | -0.243 | 1q31    |
| 294845709 | OCRL     | OCRL, inositol polyphosphate-5-phosphatase            | -0.237 | Xq35    |
| 77404395  | SND1     | staphylococcal nuclease and tudor domain containing 1 | -0.235 | 4q22    |
| 26006243  | KCND2    | potassium voltage-gated channel subfamily D member 2  | -0.230 | 4q22    |
| 717324516 | SCN8A    | sodium voltage-gated channel alpha subunit 8          | -0.226 | 7q36    |
| 281306738 | PCDH19   | protocadherin 19                                      | -0.220 | Xq32    |
| 11559947  | CASK     | calcium/calmodulin dependent serine protein kinase    | -0.215 | Xq12    |

|           |         |                                                                          |        |         |
|-----------|---------|--------------------------------------------------------------------------|--------|---------|
| 47846864  | CADM1   | cell adhesion molecule 1                                                 | -0.213 | 8q23    |
| 755533955 | ANK3    | ankyrin 3                                                                | -0.211 | 20p11   |
| 56090379  | POMGNT1 | protein O-linked mannanose N-acetylglucosaminyltransferase 1 (beta 1,2-) | -0.209 | 5q35    |
| 149050844 | DNMT3A  | DNA methyltransferase 3 alpha                                            | -0.208 | 6q14    |
| 39104626  | CAMK2A  | calcium/calmodulin dependent protein kinase II alpha                     | -0.206 | 18q12.1 |
| 148681975 | NXPH1   | neurexophilin 1                                                          | -0.205 | 4q21    |
| 747019224 | SRCAP   | Snf2 related CREBBP activator protein                                    | -0.201 | 1q37    |
| 157817710 | FER     | FER tyrosine kinase                                                      | -0.200 | 9q37    |
| 19705535  | PACS1   | phosphofurin acidic cluster sorting protein 1                            | -0.194 | 1q43    |
| 564328626 | HERC2   | HECT and RLD domain containing E3 ubiquitin protein ligase 2             | -0.193 | 1q22    |
| 564310645 | PLXNB1  | plexin B1                                                                | -0.192 | 8q32    |
| 568981376 | DIP2C   | disco interacting protein 2 homolog C                                    | -0.191 | 17q12.1 |
| 71896543  | SHANK3  | SH3 and multiple ankyrin repeat domains 3                                | -0.188 | 7q34    |
| 288806592 | PRKCB   | protein kinase C beta                                                    | -0.187 | 1q36    |
| 115311606 | MAPK3   | mitogen-activated protein kinase 3                                       | -0.185 | 1q36    |
| 37360128  | CNTNAP2 | contactin associated protein-like 2                                      | -0.183 | 4q24    |
| 157818589 | TSPAN7  | tetraspanin 7                                                            | -0.180 | Xq12    |
| 13928946  | SMC1A   | structural maintenance of chromosomes 1A                                 | -0.179 | Xq13    |
| 29789269  | GRIA1   | glutamate ionotropic receptor AMPA type subunit 1                        | -0.178 | 10q22   |
| 157823569 | EXOC6B  | exocyst complex component 6B                                             | -0.178 | 4q34    |
| 149069395 | CUL7    | cullin 7                                                                 | -0.178 | 9q12    |
| 198386334 | KDM4B   | lysine demethylase 4B                                                    | -0.178 | 9q12    |
| 11560079  | KIT     | KIT proto-oncogene receptor tyrosine kinase                              | -0.176 | 14p11   |
| 11560055  | KHDRBS3 | KH RNA binding domain containing, signal transduction associated 3       | -0.174 | 7q34    |
| 14091754  | GRIP1   | glutamate receptor interacting protein 1                                 | -0.170 | 7q22    |
| 17864836  | CACNA1C | calcium voltage-gated channel subunit alpha1 C                           | -0.168 | 4q42    |
| 403224975 | SBF1    | SET binding factor 1                                                     | -0.168 | 7q34    |
| 149052114 | CACNA1H | calcium voltage-gated channel subunit alpha1 H                           | -0.167 | 10q12   |

|           |          |                                                                                                   |        |           |
|-----------|----------|---------------------------------------------------------------------------------------------------|--------|-----------|
| 13592131  | DGKZ     | diacylglycerol kinase zeta                                                                        | -0.167 | 3q24      |
| 114145542 | ARHGAP5  | Rho GTPase activating protein 5                                                                   | -0.157 | 6q23      |
| 9507159   | SYN1     | synapsin I                                                                                        | -0.156 | Xq11      |
| 148747541 | HNRNPU   | heterogeneous nuclear ribonucleoprotein U                                                         | -0.150 | 13q25     |
| 208973288 | PREX1    | phosphatidylinositol-3,4,5-trisphosphate dependent Rac exchange factor 1                          | -0.149 | 3q42      |
| 148682872 | MTOR     | mechanistic target of rapamycin                                                                   | -0.148 | 5q36      |
| 148700348 | ZMYND11  | zinc finger MYND-type containing 11                                                               | -0.144 | 17q12.1   |
| 149017161 | APC      | APC, WNT signaling pathway regulator                                                              | -0.134 | 18p12     |
| 259155312 | AGAP2    | ArfGAP with GTPase domain, ankyrin repeat and PH domain 2                                         | -0.134 | 7q22      |
| 224967068 | PLCB1    | phospholipase C beta 1                                                                            | -0.127 | 3q36      |
| 149050659 | BIRC6    | baculoviral IAP repeat containing 6                                                               | -0.125 | 6q13      |
| 253683488 | NTRK2    | neurotrophic receptor tyrosine kinase 2                                                           | -0.118 | 17p14     |
| 149023410 | SNAP25   | synaptosome associated protein 25                                                                 | -0.118 | 3q36      |
| 13929102  | APBA2    | amyloid beta precursor protein binding family A member 2                                          | -0.116 | 1q22      |
| 77627981  | SHANK1   | SH3 and multiple ankyrin repeat domains 1                                                         | -0.107 | 1q22      |
| 149020473 | SMARCA4  | SWI/SNF related, matrix associated, actin dependent regulator of chromatin, subfamily a, member 4 | -0.101 | 8q13      |
| 148694359 | MYO5A    | myosin VA                                                                                         | -0.086 | 8q24      |
| 38372401  | NRCAM    | neuronal cell adhesion molecule                                                                   | -0.080 | 6q21      |
| 149022387 | NCKAP1   | NCK associated protein 1                                                                          | -0.073 | 3q24      |
| 148692349 | ATP1A3   | ATPase Na <sup>+</sup> /K <sup>+</sup> transporting subunit alpha 3                               | -0.064 | 1q21      |
| 148673176 | FABP7    | fatty acid binding protein 7                                                                      | -0.057 | 20q12     |
| 40254595  | DPYSL2   | dihydropyrimidinase like 2                                                                        | -0.051 | 15p12     |
| 2266994   | OGT      | O-linked N-acetylglucosamine (GlcNAc) transferase                                                 | -0.008 | Xq22      |
| 7305363   | PAFAH1B1 | platelet activating factor acetylhydrolase 1b regulatory subunit 1                                | 0.060  | 10q24     |
| 407728599 | CTNND2   | catenin delta 2                                                                                   | 0.066  | 2q22      |
| 17978461  | BRINP1   | BMP/retinoic acid inducible neural specific 1                                                     | 0.087  | 5q24      |
| 25742568  | DPYSL3   | dihydropyrimidinase like 3                                                                        | 0.101  | 18p11-q11 |
| 148672704 | CSNK1E   | casein kinase 1 epsilon                                                                           | 0.109  | 7q34      |

|           |           |                                                                                |       |         |
|-----------|-----------|--------------------------------------------------------------------------------|-------|---------|
| 13929006  | RAB2A     | RAB2A, member RAS oncogene family                                              | 0.118 | 5q13    |
| 157818315 | CUL3      | cullin 3                                                                       | 0.139 | 9q34    |
| 564328896 | CHD2      | chromodomain helicase DNA binding protein 2                                    | 0.145 | 1q31    |
| 18959272  | KCNQ2     | potassium voltage-gated channel subfamily Q member 2                           | 0.146 | 3q43    |
| 157820255 | MED13     | mediator complex subunit 13                                                    | 0.147 | 10q26   |
| 672075032 | MARK1     | microtubule affinity regulating kinase 1                                       | 0.152 | 13q26   |
| 393716310 | WAC       | WW domain containing adaptor with coiled-coil                                  | 0.154 | 17q12.1 |
| 148688660 | FEZF2     | FEZ family zinc finger 2                                                       | 0.155 | 15p16   |
| 157819885 | SETD5     | SET domain containing 5                                                        | 0.155 | 4q42    |
| 300793740 | TANC2     | tetratricopeptide repeat, ankyrin repeat and coiled-coil containing 2          | 0.156 | 10q32.1 |
| 13928824  | YWHAE     | tyrosine 3-monooxygenase/tryptophan 5-monooxygenase activation protein epsilon | 0.165 | 10q24   |
| 209447111 | PDZD4     | PDZ domain containing 4                                                        | 0.166 | Xq37    |
| 568921780 | EIF4E     | eukaryotic translation initiation factor 4E                                    | 0.167 | 2q44    |
| 171543899 | PLXNA4    | plexin A4                                                                      | 0.173 | 4q22    |
| 672050411 | RAB11FIP5 | RAB11 family interacting protein 5                                             | 0.173 | 4q34    |
| 22024394  | FABP5     | fatty acid binding protein 5                                                   | 0.177 | 2q23    |
| 86477155  | PER1      | period circadian clock 1                                                       | 0.185 | 10q24   |
| 8393415   | GAP43     | growth associated protein 43                                                   | 0.191 | 11q21   |
| 672042487 | NBEA      | neurobeachin                                                                   | 0.196 | 2q26    |
| 10720132  | NEO1      | neogenin 1                                                                     | 0.198 | 8q24    |
| 197927410 | SETBP1    | SET binding protein 1                                                          | 0.205 | 18q12.3 |
| 33356154  | UBE2H     | ubiquitin conjugating enzyme E2 H                                              | 0.210 | 4q22    |
| 564393951 | MBD1      | methyl-CpG binding domain protein 1                                            | 0.217 | 18q12.2 |
| 8394405   | SLC7A5    | solute carrier family 7 member 5                                               | 0.220 | 19q12   |
| 59709464  | PIK3R2    | phosphoinositide-3-kinase regulatory subunit 2                                 | 0.221 | 16p14   |
| 2804296   | CDH8      | cadherin 8                                                                     | 0.221 | 19p13   |
| 83267872  | ADNP      | activity dependent neuroprotector homeobox                                     | 0.227 | 3q42    |
| 42627759  | SMC3      | structural maintenance of chromosomes 3                                        | 0.230 | 1q55    |
| 11559976  | EXOC5     | exocyst complex component 5                                                    | 0.234 | 15p14   |
| 27229298  | ELAVL3    | ELAV like RNA binding protein 3                                                | 0.238 | 8q13    |

|           |          |                                                               |       |          |
|-----------|----------|---------------------------------------------------------------|-------|----------|
| 157787066 | SLC29A4  | solute carrier family 29 member 4                             | 0.239 | 12p11    |
| 29612542  | H2AFZ    | H2A histone family member Z                                   | 0.241 | 2q44     |
| 443906726 | DLGAP3   | DLG associated protein 3                                      | 0.245 | 5q36     |
| 145558904 | EML1     | echinoderm microtubule associated protein like 1              | 0.254 | 6q32     |
| 149038734 | EIF4EBP2 | eukaryotic translation initiation factor 4E binding protein 2 | 0.260 | 20q11    |
| 201066397 | MPP6     | membrane palmitoylated protein 6                              | 0.264 | 4q24     |
| 124487247 | PRICKLE2 | prickle planar cell polarity protein 2                        | 0.264 | 4q34     |
| 281332151 | ROBO2    | roundabout guidance receptor 2                                | 0.266 | 11p11    |
| 61556927  | EIF3G    | eukaryotic translation initiation factor 3 subunit G          | 0.269 | 8q13     |
| 6978787   | DYRK1A   | dual specificity tyrosine phosphorylation regulated kinase 1A | 0.273 | 11q11    |
| 157817961 | PHF3     | PHD finger protein 3                                          | 0.277 | 9q21     |
| 13929168  | FAT1     | FAT atypical cadherin 1                                       | 0.296 | 16q11    |
| 23097350  | TOMM20   | translocase of outer mitochondrial membrane 20                | 0.299 | 19q12    |
| 425384    | CAMK4    | calcium/calmodulin dependent protein kinase IV                | 0.313 | 18p12    |
| 564315672 | CLASP1   | cytoplasmic linker associated protein 1                       | 0.336 | 13q11    |
| 672026667 | CUX1     | cut like homeobox 1                                           | 0.338 | 12q12    |
| 157818841 | POGZ     | pogo transposable element derived with ZNF domain             | 0.346 | 2q34     |
| 119616373 | MEF2C    | myocyte enhancer factor 2C                                    | 0.351 | 2q11     |
| 24025618  | DAB1     | DAB1, reelin adaptor protein                                  | 0.352 | 5q33-q34 |
| 40789237  | PCDHA4   | protocadherin alpha 4                                         | 0.377 | 18p11    |
| 564300780 | TRIM33   | tripartite motif containing 33                                | 0.378 | 2q34     |
| 404312698 | CASC4    | cancer susceptibility 4                                       | 0.390 | 3q35     |
| 157819717 | NIPA2    | non imprinted in Prader-Willi/Angelman syndrome 2             | 0.429 | 1q22     |
| 149058952 | MEF2C    | myocyte enhancer factor 2C                                    | 0.441 | 2q11     |
| 157823369 | TERF2    | telomeric repeat binding factor 2                             | 0.442 | 19q12    |
| 148687364 | Cux1     | cut-like homeobox 1                                           | 0.443 | 12q12    |
| 157817845 | KMT5B    | lysine methyltransferase 5B                                   | 0.450 | 1q43     |
| 40789241  | PCDHA3   | protocadherin alpha 3                                         | 0.450 | 18p11    |
| 564335688 | TRIO     | trio Rho guanine nucleotide exchange factor                   | 0.485 | 2q22     |
| 157824124 | NUAK1    | NUAK family kinase 1                                          | 0.494 | 7q13     |
| 13928942  | PER2     | period circadian clock 2                                      | 0.513 | 9q36     |
| 34328151  | TBR1     | T-box, brain 1                                                | 0.518 | 3q21     |
| 157820017 | FBXO33   | F-box protein 33                                              | 0.542 | 6q23     |
| 16758574  | CNTN5    | contactin 5                                                   | 0.636 | 8q11     |

|           |          |                                                                                                 |       |         |
|-----------|----------|-------------------------------------------------------------------------------------------------|-------|---------|
| 11560065  | GPR85    | G protein-coupled receptor 85                                                                   | 0.656 | 4q21    |
| 124486586 | AUTS2    | AUTS2, activator of transcription and developmental regulator                                   | 0.660 | 12q12   |
| 293348214 | CCDC88C  | coiled-coil domain containing 88C                                                               | 0.665 | 6q32    |
| 755566692 | HUWE1    | HECT, UBA and WWE domain containing 1, E3 ubiquitin protein ligase                              | 0.776 | Xq13    |
| 564329918 | EMSY     | EMSY, BRCA2 interacting transcriptional repressor                                               | 0.785 | 1q32    |
| 564322442 | Kdm6a    | lysine demethylase 6A                                                                           | 0.842 | Xq11    |
| 564315667 | CLASP1   | cytoplasmic linker associated protein 1                                                         | 0.851 | 13q11   |
| 741943159 | OTX1     | orthodenticle homeobox 1                                                                        | 0.947 | 14q22   |
| 109472884 | UBE3C    | ubiquitin protein ligase E3C                                                                    | 0.950 | 4q11    |
| 6679423   | POU3F2   | POU class 3 homeobox 2                                                                          | 0.956 | 5q21    |
| 564329920 | EMSY     | EMSY, BRCA2 interacting transcriptional repressor                                               | 0.991 | 1q32    |
| 109480102 | SMARCC2  | SWI/SNF related, matrix associated, actin dependent regulator of chromatin subfamily c member 2 | 1.042 | 7q11    |
| 564327667 | TSHZ3    | teashirt zinc finger homeobox 3                                                                 | 1.080 | 1q21    |
| 148689488 | SYN3     | synapsin III                                                                                    | 1.225 | 7q13    |
| 755566692 | HUWE1    | HECT, UBA and WWE domain containing 1, E3 ubiquitin protein ligase                              | 1.288 | Xq13    |
| 672031995 | Kdm6a    | lysine demethylase 6A                                                                           | 1.326 | Xq11    |
| 293358436 | FOXP2    | forkhead box P2                                                                                 | 1.342 | 4q21    |
| 564313842 | SLC38A10 | solute carrier family 38 member 10                                                              | 1.585 | 10q32.3 |
| 672012705 | SYNE1    | spectrin repeat containing nuclear envelope protein 1                                           | 1.617 | 1q11    |
| 568990288 | NIPBL    | NIPBL, cohesin loading factor                                                                   | 1.747 | 2q16    |
| 755515866 | BRAF     | B-Raf proto-oncogene, serine/threonine kinase                                                   | 1.876 | 4q22    |
| 564326713 | ZC3H4    | zinc finger CCCH-type containing 4                                                              | 1.881 | 1q21    |
| 24308466  | ITGB3    | integrin subunit beta 3                                                                         | 2.303 | 10q32.1 |
| 672061705 | KMT2A    | lysine methyltransferase 2A                                                                     | 2.760 | 8q22    |
| 564329920 | EMSY     | EMSY, BRCA2 interacting transcriptional repressor                                               | 4.585 | 1q32    |
| 149066939 | PTPRB    | protein tyrosine phosphatase, receptor type B                                                   | 5.248 | 7q22    |
| 755566692 | HUWE1    | HECT, UBA and WWE domain containing 1, E3 ubiquitin protein ligase                              | 5.728 | Xq13    |

|           |        |                                                                    |        |       |
|-----------|--------|--------------------------------------------------------------------|--------|-------|
| 564329926 | EMSY   | EMSY, BRCA2 interacting transcriptional repressor                  | 5.807  | 1q32  |
| 392342157 | PHIP   | pleckstrin homology domain interacting protein                     | 6.629  | 8q31  |
| 755566690 | HUWE1  | HECT, UBA and WWE domain containing 1, E3 ubiquitin protein ligase | 6.700  | Xq13  |
| 575403049 | ERBIN  | erb2 interacting protein                                           | 7.622  | 2q12  |
| 60360628  | ATP8A1 | ATPase phospholipid transporting 8A1                               | 7.877  | 14p11 |
| 109472884 | UBE3C  | ubiquitin protein ligase E3C                                       | 8.155  | 4q11  |
| 672035060 | CIC    | capicua transcriptional repressor                                  | 10.209 | 1q21  |



**Supplementary Table S3. Top biological functions and canonical pathways associated with dysregulated genes from RNA-seq identified by Ingenuity Pathway Analysis (IPA).**

Biological pathways and canonical pathways predicted by IPA were significantly associated with dysregulated genes in both sexes and in males and females separately. P-values were calculated using Fisher's exact test ( $P < 0.05$ ). The numbers of genes involved in each biological function and pathway are shown.

| Both Sexes                                                                        | Males                                                                   | Females                                                                      |
|-----------------------------------------------------------------------------------|-------------------------------------------------------------------------|------------------------------------------------------------------------------|
| <b>Biological functions and pathways</b>                                          |                                                                         |                                                                              |
| <b>Physiological system development and function (P-values; number of genes)</b>  |                                                                         |                                                                              |
| Connective Tissue Development and Function<br>(3.37E-04 - 3.37E-04; 8)            | Nervous System Development and Function<br>(6.56E-03 - 1.12E-03; 37)    | Cardiovascular System Development and Function<br>(9.84E-05 - 1.06E-08; 153) |
| Skeletal and Muscular System Development and Function<br>(3.37E-04 - 3.37E-04; 8) | Organismal Development<br>(8.40E-03 - 1.12E-03; 50)                     | Organismal Development<br>(1.56E-05 - 1.06E-08; 126)                         |
| Tissue Development<br>(5.82E-03 - 3.37E-04; 16)                                   | Tissue Development<br>(7.67E-03 - 1.12E-03; 71)                         | Tissue Development<br>(1.61E-04 - 2.31E-07; 116)                             |
| Digestive System Development and Function<br>(7.30E-03 - 6.71E-04; 32)            | Connective Tissue Development and Function<br>(5.82E-03 - 1.84E-03; 36) | Organismal Survival<br>(3.95E-06 - 2.50E-06; 108)                            |
| Reproductive System Development and Function<br>(5.85E-03 - 1.42E-03; 19)         | Inflammatory Response<br>(5.83E-03-5.83E-03; 4)                         | Nervous System Development and Function<br>(1.86E-05 - 1.86E-05; 11)         |
| <b>Top canonical pathways (P-values; number of genes)</b>                         |                                                                         |                                                                              |
| Cholesterol Biosynthesis I<br>(2.46E-04; 9)                                       | Glutamate Receptor Signaling<br>(5.86E-05; 14)                          | Axonal Guidance Signaling<br>(1.92E-07; 97)                                  |
| Cholesterol Biosynthesis II (via 24,25-dihydrostanosterol)<br>(2.46E-04; 9)       | Axonal Guidance Signaling<br>(1.39E-03; 52)                             | Neuropathic Pain Signaling in Dorsal Horn Neurons<br>(6.89E-07; 35)          |
| Cholesterol Biosynthesis III (via Desmosterol)<br>(2.46E-04; 9)                   | Amyotrophic Lateral Sclerosis Signaling<br>(1.63E-03; 18)               | Nitric Oxide Signaling in the Cardiovascular System<br>(1.60E-06; 33)        |
| Superpathway of Cholesterol Biosynthesis<br>(3.89E-04; 14)                        | Circadian Rhythm Signaling<br>(2.79E-03; 8)                             | Glutamate Receptor Signaling<br>(1.39E-05; 20)                               |
| Ketogenesis<br>(1.18E-03; 7)                                                      | Huntington's Disease Signaling<br>(9.30E-03; 29)                        | Circadian Rhythm Signaling<br>(6.31E-04; 12)                                 |

**Supplementary Table S4. Comparison analysis using sets of DEGs in males and females showing sex-specific effects among neurological pathways.** A comparison analysis between males and females was performed by IPA software using the lists of DEGs for each sex. The canonical pathways related to ASD that were shown to be significantly affected in males were not significantly affected in females, and vice versa. Statistical significance was determined using Fisher's exact test and is shown as P-values.

| <b>Ingenuity canonical pathways</b>                      | <b>Males</b> | <b>Females</b>  |
|----------------------------------------------------------|--------------|-----------------|
| DNA Methylation and Transcriptional Repression Signaling | <b>0.015</b> | 0.264           |
| 4-Aminobutyrate Degradation I                            | <b>0.017</b> | 0.344           |
| Docosahexaenoic Acid (DHA) Signaling                     | <b>0.043</b> | 0.072           |
| Amyloid Processing                                       | NS           | <b>3.46E-05</b> |
| IGF-1 Signaling                                          | 0.060        | <b>7.24E-05</b> |
| Synaptic Long-Term Potentiation                          | 0.116        | <b>2.34E-04</b> |
| CREB Signaling in Neurons                                | 0.066        | <b>3.72E-04</b> |
| Netrin Signaling                                         | 1            | <b>9.77E-04</b> |
| Wnt/ $\beta$ -catenin Signaling                          | 0.310        | <b>1.20E-02</b> |
| Androgen Signaling                                       | 0.331        | <b>1.51E-02</b> |
| eNOS Signaling                                           | 0.248        | <b>5.89E-03</b> |

**Supplementary Table S5. The lists of overlapping genes between BPA-responsive genes in the hippocampus and the dysregulated genes in ASD post-mortem brain tissues**

| <b>DEGs from Voineague, I. et al. (2011)</b> | <b>Overlapping Genes with DEGs in Both Sexes (206 genes)</b> | <b>Overlapping Genes with DEGs in Male (80 genes)</b> | <b>Overlapping genes with DEGs in Female (159 genes)</b> |
|----------------------------------------------|--------------------------------------------------------------|-------------------------------------------------------|----------------------------------------------------------|
| A2BP1                                        | ABCB9                                                        | ACSBG1                                                | ABCA1                                                    |
| A2BP1                                        | ABCG4                                                        | AEBP1                                                 | ABCC5                                                    |
| A2BP1                                        | ACSBG1                                                       | ANGPTL4                                               | ABCC8                                                    |
| ABCA1                                        | ADCYAP1                                                      | APOE                                                  | ABCG4                                                    |
| ABCB9                                        | ADORA2B                                                      | AQP4                                                  | ABLIM2                                                   |
| ABCB9                                        | ADPRHL1                                                      | ATP1A3                                                | ACSBG1                                                   |
| ABCC5                                        | AEBP1                                                        | ATP1B1                                                | ACSL4                                                    |
| ABCC8                                        | AGA                                                          | ATP8B2                                                | ADORA2B                                                  |
| ABCG4                                        | ALDH18A1                                                     | ATRNL1                                                | AEBP1                                                    |
| ABLIM2                                       | ANGPTL4                                                      | BRD2                                                  | AHI1                                                     |
| ABTB1                                        | ANK1                                                         | BRPF1                                                 | ALDH18A1                                                 |
| ACOT7                                        | ANKRD6                                                       | CABIN1                                                | AMPH                                                     |
| ACSBG1                                       | ANXA2                                                        | CABP1                                                 | ANAPC4                                                   |
| ACSL4                                        | APOE                                                         | CADPS2                                                | ANK1                                                     |
| ACSL5                                        | AQP4                                                         | CDC25B                                                | ANKRD6                                                   |
| ACTL6B                                       | ARHGAP10                                                     | CHD5                                                  | ANXA2                                                    |
| ACTN1                                        | ARMCX5                                                       | CKB                                                   | APOE                                                     |
| ACTR1B                                       | ATP1B1                                                       | COBLL1                                                | AQP4                                                     |
| ADCYAP1                                      | ATP2B2                                                       | CPEB2                                                 | ATP1A1                                                   |
| ADFP                                         | ATP2B3                                                       | CRYM                                                  | ATP1A3                                                   |
| ADM                                          | ATRNL1                                                       | DFFA                                                  | ATP1B1                                                   |
| ADORA2B                                      | BAG3                                                         | DHRS9                                                 | ATP2B2                                                   |
| ADPRHL1                                      | BRD2                                                         | DTNA                                                  | ATP2B3                                                   |
| AEBP1                                        | BRPF1                                                        | ERC1                                                  | ATP8B2                                                   |
| AES                                          | C1QB                                                         | FBLN2                                                 | ATRNL1                                                   |
| AGA                                          | CADPS                                                        | GPR68                                                 | BRD2                                                     |
| AGTRL1                                       | CADPS2                                                       | GRIN3A                                                | BRSK1                                                    |
| AHI1                                         | CBLN4                                                        | HEY2                                                  | CABIN1                                                   |
| AKR1C2                                       | CCDC90B                                                      | HLA-A                                                 | CACHD1                                                   |
| AKR1C3                                       | CDC14B                                                       | HSPB1                                                 | CADPS                                                    |
| AKT1                                         | CDC25B                                                       | IGFBP7                                                | CADPS2                                                   |
| ALDH18A1                                     | CDH11                                                        | INA                                                   | CAMK1G                                                   |
| ALDH1A3                                      | CDS1                                                         | KCNB1                                                 | CELSR3                                                   |
| ALDH1L1                                      | CHKB                                                         | KIF5A                                                 | CHRM1                                                    |
| ALDH4A1                                      | CLDN5                                                        | LRP1                                                  | COL6A1                                                   |
| ALPL                                         | CLYBL                                                        | LYSMD4                                                | CPSF1                                                    |
| AMPH                                         | COL6A1                                                       | MAL2                                                  | CYBA                                                     |
| AMT                                          | COMMD2                                                       | MAP4                                                  | DDIT4                                                    |

|           |         |           |          |
|-----------|---------|-----------|----------|
| AMY2B     | CPEB2   | MET       | DNAJB1   |
| ANAPC4    | CPSF1   | MSI2      | DPYSL3   |
| ANGPTL4   | CRYZ    | NFIB      | DTNA     |
| ANK1      | CXCL16  | NOV       | DUSP8    |
| ANKRA2    | CYB5D2  | NRIP3     | DYNC11I  |
| ANKRD15   | DDIT4   | NRP1      | EEF2K    |
| ANKRD20A1 | DFFA    | NSF       | ELAVL4   |
| ANKRD29   | DNAJB1  | OGDHL     | EMP1     |
| ANKRD6    | DPP6    | OSBPL8    | EMP3     |
| ANKRD9    | DPYSL3  | PALLD     | EMX1     |
| ANTXR1    | DTNA    | PCSK2     | EPHX1    |
| ANXA1     | DYNC11I | PDGFRA    | EYA2     |
| ANXA11    | EAF1    | PHYHIP    | FAM89B   |
| ANXA2     | ELK1    | PKD1      | FDFT1    |
| AP2A2     | EMP3    | PLOD3     | GFAP     |
| APBA2BP   | EMX1    | PPP1R13B  | GLRB     |
| APOC1     | EPHX1   | PPP1R16B  | GRIN3A   |
| APOE      | ERC1    | PTPRZ1    | GYPC     |
| AQP4      | EYA2    | RAB11FIP3 | HARS     |
| ARC       | FAM3C   | RHBDL3    | HES6     |
| ARFGAP1   | FAM81A  | RPS2      | HIPK2    |
| ARHGAP10  | FDFT1   | S100A10   | HSP90AA1 |
| ARMC10    | FGFRL1  | SH3D19    | IDI1     |
| ARMC8     | GABRA1  | SLC6A17   | IGFBP4   |
| ARMCX2    | GABRB3  | SNAP25    | IGFBP5   |
| ARMCX5    | GADD45B | SOX4      | IGFBP7   |
| ARPC5     | GAS8    | SPARC     | IGFBPL1  |
| ARPP-21   | GBP2    | SPTBN1    | KCNH4    |
| ARRDC4    | GFAP    | STOX2     | KCNT1    |
| ASB13     | GFRA2   | SYT13     | KIF1C    |
| ASCC3L1   | GLRB    | TAGLN3    | KIFC2    |
| ATP1A1    | GLS2    | TIMP1     | KIT      |
| ATP1A1    | GPR83   | TNRC6A    | LIME1    |
| ATP1A1    | GPX3    | TRIM37    | LRFN4    |
| ATP1A3    | GRIN3A  | TSPYL2    | LRP1     |
| ATP1B1    | GSTM3   | TXNIP     | LRP4     |
| ATP2B2    | GYPC    | UBE2O     | LYSMD4   |
| ATP2B2    | HARS    | VPS13C    | MAGI1    |
| ATP2B3    | HAVCR2  | WASF1     | MAL2     |
| ATP6V0D1  | HEY2    | ZBTB40    | MAP2K1   |
| ATP6V1A   | HLA-A   | ZNF248    | MAP3K12  |
| ATP6V1C1  | HSPB1   | ZNF358    | MAP7D2   |
| ATP6V1G2  | HSPB6   |           | MCL1     |
| ATP8B2    | IER3    |           | ME3      |

|           |          |  |           |
|-----------|----------|--|-----------|
| ATRNL1    | IGFBP4   |  | MFGE8     |
| B3GNT6    | IL17RB   |  | MIB2      |
| BAG3      | ITGB1BP1 |  | MRPS26    |
| BAIAP2    | KATNA1   |  | MRPS30    |
| BAIAP2L2  | KCNB2    |  | MYADM     |
| BCAN      | KCNMA1   |  | NAPB      |
| BCAS4     | KCNT1    |  | NCALD     |
| BCHE      | KIF1C    |  | NCDN      |
| BID       | KIF5A    |  | NCOA1     |
| BLMH      | KIFC2    |  | NDRG2     |
| BMS1L     | KIT      |  | NELL2     |
| BRD2      | LGI3     |  | NEUROD6   |
| BRPF1     | MAL2     |  | NFIB      |
| BRSK1     | MAOB     |  | NGEF      |
| BRSK2     | MAP2K1   |  | NOV       |
| BST2      | MAP3K12  |  | NRIP3     |
| BTBD11    | MAP4     |  | NRP1      |
| BTG1      | MAP7D2   |  | NSDHL     |
| BTG3      | MAPK10   |  | NSF       |
| C10orf10  | MCL1     |  | PALLD     |
| C10orf116 | ME3      |  | PCP4      |
| C10orf54  | MERTK    |  | PDGFRA    |
| C12orf24  | MIB2     |  | PDZD4     |
| C13orf16  | MRPS30   |  | PFKP      |
| C14orf106 | MSX1     |  | PGAP1     |
| C1orf131  | MYLIP    |  | PLOD1     |
| C1orf173  | NAPB     |  | PLXDC2    |
| C1orf52   | NDRG2    |  | PPM1F     |
| C1orf54   | NELL2    |  | PRKDC     |
| C1orf59   | NGB      |  | PRMT2     |
| C1QB      | NGEF     |  | PTPRR     |
| C1QC      | NOV      |  | PTPRZ1    |
| C20orf100 | NOXA1    |  | RAB11FIP3 |
| C20orf103 | NRIP3    |  | RAB11FIP5 |
| C20orf28  | NSDHL    |  | RAD23B    |
| C20orf58  | NSF      |  | RASIP1    |
| C20orf94  | OAF      |  | RDH10     |
| C21orf2   | OGDHL    |  | REXO1     |
| C21orf33  | OLR1     |  | RPS2      |
| C3orf18   | OPN3     |  | RYR2      |
| C5orf16   | PAK6     |  | SAMD14    |
| C6orf117  | PALLD    |  | SDF2L1    |
| C6orf190  | PCDH20   |  | SETBP1    |
| C6orf32   | PCP4     |  | SEZ6      |

|           |           |  |          |
|-----------|-----------|--|----------|
| C6orf79   | PCSK2     |  | SH3D19   |
| C9orf100S | PDE7B     |  | SLC15A3  |
| C9orf45   | PDE8B     |  | SLC17A6  |
| C9orf61   | PDK4      |  | SLC25A27 |
| C9orf86   | PEL3      |  | SLC9A5   |
| C9orf88   | PLOD3     |  | SLC9A9   |
| CABIN1    | PLXDC2    |  | SMYD2    |
| CABP1     | PNMA3     |  | SNAP25   |
| CACHD1    | PPP1R13B  |  | SOX4     |
| CACNA1A   | PPP1R3C   |  | SPARC    |
| CACNA2D3  | PRDX4     |  | SPTBN1   |
| CADPS     | PREPL     |  | SQLE     |
| CADPS     | PRICKLE1  |  | STK36    |
| CADPS2    | PRKDC     |  | SULF1    |
| CALB2     | PRMT2     |  | SVOP     |
| CAMK1G    | PRRT2     |  | TGM2     |
| CAMK2G    | PTGS2     |  | THBS3    |
| CAMK2N2   | PTK2B     |  | TLE2     |
| CARHSP1   | PTPRR     |  | TNFRSF1A |
| CARM1     | PTPRZ1    |  | TNNT2    |
| CART      | PVALB     |  | TNRC6A   |
| CBLN2     | RAB11FIP3 |  | TOMM20   |
| CBLN4     | RAD23B    |  | TRIM37   |
| CCBL2     | RANGAP1   |  | TSPAN9   |
| CCDC25    | RASGRP1   |  | TUBGCP5  |
| CCDC34    | REEP6     |  | UCHL1    |
| CCDC50    | RGS12     |  | UGCG     |
| CCDC69    | RGS2      |  | VPS13C   |
| CCDC90B   | RHBDL3    |  | WASF1    |
| CCNB1IP1  | RIMS4     |  | WDR19    |
| CCPG1     | RND2      |  | ZBTB16   |
| CD14      | RNF165    |  | ZBTB40   |
| CD14      | RPN2      |  | ZFYVE19  |
| CD24      | RPS2      |  |          |
| CD300LG   | RYR2      |  |          |
| CD44      | SCN4B     |  |          |
| CD74      | SFT2D1    |  |          |
| CD99      | SH3GL2    |  |          |
| CDC14B    | SLC15A3   |  |          |
| CDC25B    | SLC25A29  |  |          |
| CDH10     | SLC4A8    |  |          |
| CDH11     | SLC6A17   |  |          |
| CDH12     | SLC7A8    |  |          |
| CDKN1A    | SLC9A5    |  |          |

|         |          |  |  |
|---------|----------|--|--|
| CDS1    | SOD2     |  |  |
| CEBPD   | SORCS1   |  |  |
| CELSR3  | SOX4     |  |  |
| CFLAR   | SP110    |  |  |
| CGI-38  | SPTBN1   |  |  |
| CHD5    | SQLE     |  |  |
| CHGA    | STAM     |  |  |
| CHGB    | SYT13    |  |  |
| CHKB    | TAGLN2   |  |  |
| CHN2    | TAGLN3   |  |  |
| CHRD    | TCERG1L  |  |  |
| CHRM1   | TGM2     |  |  |
| CIRBP   | THBS3    |  |  |
| CITED2  | TIAM1    |  |  |
| CKB     | TIMP1    |  |  |
| CKMT1A  | TNFRSF1A |  |  |
| CLCN3   | TRIM37   |  |  |
| CLDN10  | TRIP13   |  |  |
| CLDN5   | TSPAN9   |  |  |
| CLIC1   | TSPO     |  |  |
| CLTB    | TTC17    |  |  |
| CLYBL   | TYROBP   |  |  |
| CLYBL   | UGCG     |  |  |
| CMKOR1  | UPP1     |  |  |
| CMTM7   | VAMP8    |  |  |
| CNN3    | VAV3     |  |  |
| CNNM1   | VHL      |  |  |
| COBLL1  | VIP      |  |  |
| COL20A1 | VPS13C   |  |  |
| COL4A1  | WDR19    |  |  |
| COL6A1  | ZBTB16   |  |  |
| COL7A1  | ZBTB40   |  |  |
| COMMD2  | ZFYVE19  |  |  |
| COPG    | ZHX2     |  |  |
| CORO6   | ZNF365   |  |  |
| CORT    | ZSWIM4   |  |  |
| COX7A1  |          |  |  |
| CPEB2   |          |  |  |
| CPLX1   |          |  |  |
| CPLX2   |          |  |  |
| CPNE3   |          |  |  |
| CPSF1   |          |  |  |
| CRH     |          |  |  |
| CROCC   |          |  |  |

|               |  |  |  |
|---------------|--|--|--|
| CRYM          |  |  |  |
| CRYM          |  |  |  |
| CRYZ          |  |  |  |
| CSDA          |  |  |  |
| CSDC2         |  |  |  |
| CSEN          |  |  |  |
| CSMD2         |  |  |  |
| CSPG2         |  |  |  |
| CTNNAL1       |  |  |  |
| CTSH          |  |  |  |
| CUTL1         |  |  |  |
| CXCL16        |  |  |  |
| CYB5D2        |  |  |  |
| CYBA          |  |  |  |
| CYGB          |  |  |  |
| CYP2C8        |  |  |  |
| CYP2E1        |  |  |  |
| D4S234E       |  |  |  |
| DACH1         |  |  |  |
| DAK           |  |  |  |
| DBC1          |  |  |  |
| DCAMKL1       |  |  |  |
| DDIT4         |  |  |  |
| DDR1          |  |  |  |
| DFFA          |  |  |  |
| DGCR2         |  |  |  |
| DHRS9         |  |  |  |
| DIAPH1        |  |  |  |
| DIRAS1        |  |  |  |
| DIXDC1        |  |  |  |
| DIXDC1        |  |  |  |
| DKFZP564O0823 |  |  |  |
| DLX1          |  |  |  |
| DMAP1         |  |  |  |
| DNAJB1        |  |  |  |
| DNM1L         |  |  |  |
| DPP6          |  |  |  |
| DPYSL3        |  |  |  |
| DRD1IP        |  |  |  |
| DSCR1L1       |  |  |  |
| DSCR2         |  |  |  |
| DSCR2         |  |  |  |
| DSCR5         |  |  |  |
| DTNA          |  |  |  |



|         |  |  |  |
|---------|--|--|--|
| DTNA    |  |  |  |
| DTNA    |  |  |  |
| DUSP5   |  |  |  |
| DUSP8   |  |  |  |
| DYNC1I1 |  |  |  |
| DYNLT1  |  |  |  |
| EAF1    |  |  |  |
| ECE2    |  |  |  |
| ECGF1   |  |  |  |
| EEF2K   |  |  |  |
| ELAVL4  |  |  |  |
| ELK1    |  |  |  |
| ELMOD1  |  |  |  |
| EMP1    |  |  |  |
| EMP3    |  |  |  |
| EMX1    |  |  |  |
| EMX1    |  |  |  |
| ENDOGL1 |  |  |  |
| ENO2    |  |  |  |
| ENTPD3  |  |  |  |
| EPHB6   |  |  |  |
| EPHX1   |  |  |  |
| ERC1    |  |  |  |
| ESRRA   |  |  |  |
| ESRRG   |  |  |  |
| ESTRRA  |  |  |  |
| ETS2    |  |  |  |
| EXTL2   |  |  |  |
| EYA2    |  |  |  |
| F12     |  |  |  |
| FAIM    |  |  |  |
| FAIM2   |  |  |  |
| FAM100A |  |  |  |
| FAM102B |  |  |  |
| FAM3C   |  |  |  |
| FAM3C   |  |  |  |
| FAM43A  |  |  |  |
| FAM46A  |  |  |  |
| FAM73B  |  |  |  |
| FAM81A  |  |  |  |
| FAM89B  |  |  |  |
| FBLN2   |  |  |  |
| FBLN2   |  |  |  |
| FBXO31  |  |  |  |

|          |  |  |  |
|----------|--|--|--|
| FCGBP    |  |  |  |
| FDFT1    |  |  |  |
| FES      |  |  |  |
| FGF9     |  |  |  |
| FGFRL1   |  |  |  |
| FHL2     |  |  |  |
| FILIP1   |  |  |  |
| FKBP8    |  |  |  |
| FLJ11286 |  |  |  |
| FLJ20054 |  |  |  |
| FLJ20152 |  |  |  |
| FLJ20647 |  |  |  |
| FLJ25006 |  |  |  |
| FLJ25222 |  |  |  |
| FLJ25476 |  |  |  |
| FLJ30596 |  |  |  |
| FLJ30834 |  |  |  |
| FLJ37078 |  |  |  |
| FLJ37440 |  |  |  |
| FLJ39822 |  |  |  |
| FLJ40142 |  |  |  |
| FLJ90805 |  |  |  |
| FLRT3    |  |  |  |
| FNDC4    |  |  |  |
| FNDC5    |  |  |  |
| FOXO3A   |  |  |  |
| FREQ     |  |  |  |
| FRMPD2   |  |  |  |
| FRMPD2   |  |  |  |
| FSD1     |  |  |  |
| FSTL5    |  |  |  |
| FTHL11   |  |  |  |
| FTHL3    |  |  |  |
| G1P3     |  |  |  |
| G3BP2    |  |  |  |
| GABRA1   |  |  |  |
| GABRA5   |  |  |  |
| GABRB3   |  |  |  |
| GABRD    |  |  |  |
| GABRG2   |  |  |  |
| GABRG2   |  |  |  |
| GAD1     |  |  |  |
| GAD2     |  |  |  |
| GADD45B  |  |  |  |

|            |  |  |  |
|------------|--|--|--|
| GADD45G    |  |  |  |
| GALGT      |  |  |  |
| GAS8       |  |  |  |
| GBP2       |  |  |  |
| GCA        |  |  |  |
| GFAP       |  |  |  |
| GFOD1      |  |  |  |
| GFRA2      |  |  |  |
| GLRB       |  |  |  |
| GLS2       |  |  |  |
| GNA12      |  |  |  |
| GNA13      |  |  |  |
| GOLGA8B    |  |  |  |
| GPNMB      |  |  |  |
| GPR56      |  |  |  |
| GPR56      |  |  |  |
| GPR68      |  |  |  |
| GPR83      |  |  |  |
| GPRASP2    |  |  |  |
| GPX3       |  |  |  |
| GRIN1      |  |  |  |
| GRIN3A     |  |  |  |
| GRK4       |  |  |  |
| GSDML      |  |  |  |
| GSDML      |  |  |  |
| GSTM3      |  |  |  |
| GSTT1      |  |  |  |
| GYPE       |  |  |  |
| H2AFY2     |  |  |  |
| HAMP       |  |  |  |
| HAPLN4     |  |  |  |
| HARS       |  |  |  |
| HAVCR2     |  |  |  |
| HCLS1      |  |  |  |
| HERC6      |  |  |  |
| HES6       |  |  |  |
| HEY2       |  |  |  |
| HIPK2      |  |  |  |
| HIST1H1C   |  |  |  |
| HIST1H2BD  |  |  |  |
| HIST1H2BK  |  |  |  |
| HIST2H2AA3 |  |  |  |
| HIST2H2AC  |  |  |  |
| HIST2H2BE  |  |  |  |

|          |  |  |  |
|----------|--|--|--|
| HLA-A    |  |  |  |
| HLA-H    |  |  |  |
| HMFN0839 |  |  |  |
| HNRPU    |  |  |  |
| HPRT1    |  |  |  |
| HSP90AA1 |  |  |  |
| HSPA1A   |  |  |  |
| HSPA1B   |  |  |  |
| HSPB1    |  |  |  |
| HSPB3    |  |  |  |
| HSPB6    |  |  |  |
| HSPB8    |  |  |  |
| HTATIP2  |  |  |  |
| HTR4     |  |  |  |
| HYLS1    |  |  |  |
| ICA1     |  |  |  |
| ICA1     |  |  |  |
| ID3      |  |  |  |
| IDH3B    |  |  |  |
| IDI1     |  |  |  |
| IER3     |  |  |  |
| IFITM1   |  |  |  |
| IFITM2   |  |  |  |
| IFITM3   |  |  |  |
| IGFBP4   |  |  |  |
| IGFBP5   |  |  |  |
| IGFBP7   |  |  |  |
| IGFBPL1  |  |  |  |
| IGSF4    |  |  |  |
| IGSF4B   |  |  |  |
| IL17RB   |  |  |  |
| INA      |  |  |  |
| INPPL1   |  |  |  |
| INSM2    |  |  |  |
| INTS1    |  |  |  |
| INTU     |  |  |  |
| ISG20L1  |  |  |  |
| ISOC1    |  |  |  |
| ITGB1BP1 |  |  |  |
| ITGB2    |  |  |  |
| ITGB5    |  |  |  |
| ITPKA    |  |  |  |
| ITPR1    |  |  |  |
| JUN      |  |  |  |

|           |  |  |  |
|-----------|--|--|--|
| KATNA1    |  |  |  |
| KCNA5     |  |  |  |
| KCNB1     |  |  |  |
| KCNB2     |  |  |  |
| KCNG1     |  |  |  |
| KCNH3     |  |  |  |
| KCNH4     |  |  |  |
| KCNIP4    |  |  |  |
| KCNJ16    |  |  |  |
| KCNK12    |  |  |  |
| KCNMA1    |  |  |  |
| KCNMB4    |  |  |  |
| KCNN3     |  |  |  |
| KCNS1     |  |  |  |
| KCNT1     |  |  |  |
| KIAA0350  |  |  |  |
| KIAA0427  |  |  |  |
| KIAA0528  |  |  |  |
| KIAA0664  |  |  |  |
| KIAA1026  |  |  |  |
| KIAA1576  |  |  |  |
| KIAA1688  |  |  |  |
| KIAA1797  |  |  |  |
| KIF17     |  |  |  |
| KIF1C     |  |  |  |
| KIF2      |  |  |  |
| KIF5A     |  |  |  |
| KIFC2     |  |  |  |
| KIT       |  |  |  |
| KLF15     |  |  |  |
| KLHL8     |  |  |  |
| KNDC1     |  |  |  |
| LAMA5     |  |  |  |
| LAPTM5    |  |  |  |
| LARP2     |  |  |  |
| LCMT1     |  |  |  |
| LCP1      |  |  |  |
| LGALS3    |  |  |  |
| LGI3      |  |  |  |
| LHX6      |  |  |  |
| LIME1     |  |  |  |
| LIMK1     |  |  |  |
| LMO3      |  |  |  |
| LOC126208 |  |  |  |

|           |  |  |  |
|-----------|--|--|--|
| LOC144363 |  |  |  |
| LOC202134 |  |  |  |
| LOC283871 |  |  |  |
| LOC387856 |  |  |  |
| LOC387856 |  |  |  |
| LOC388419 |  |  |  |
| LOC400566 |  |  |  |
| LOC400566 |  |  |  |
| LOC649853 |  |  |  |
| LPHN2     |  |  |  |
| LRFN4     |  |  |  |
| LRP1      |  |  |  |
| LRP1B     |  |  |  |
| LRP4      |  |  |  |
| LRRC42    |  |  |  |
| LRRN6C    |  |  |  |
| LUZP1     |  |  |  |
| LY96      |  |  |  |
| LYN       |  |  |  |
| LYPD1     |  |  |  |
| LYPLAL1   |  |  |  |
| LYSMD4    |  |  |  |
| MAG11     |  |  |  |
| MAL2      |  |  |  |
| MAOB      |  |  |  |
| MAP2K1    |  |  |  |
| MAP3K12   |  |  |  |
| MAP3K13   |  |  |  |
| MAP3K6    |  |  |  |
| MAP4      |  |  |  |
| MAP7D2    |  |  |  |
| MAPK10    |  |  |  |
| MAPK9     |  |  |  |
| MAPRE2    |  |  |  |
| MARCH2    |  |  |  |
| MASS1     |  |  |  |
| MATK      |  |  |  |
| MC1R      |  |  |  |
| MCL1      |  |  |  |
| ME3       |  |  |  |
| MEG3      |  |  |  |
| MEG3      |  |  |  |
| MERTK     |  |  |  |
| MET       |  |  |  |

|          |  |  |  |
|----------|--|--|--|
| METRN    |  |  |  |
| MFGE8    |  |  |  |
| MGC11257 |  |  |  |
| MGC26718 |  |  |  |
| MGC33846 |  |  |  |
| MGC40405 |  |  |  |
| MGC4172  |  |  |  |
| MGC99813 |  |  |  |
| MGP      |  |  |  |
| MGST1    |  |  |  |
| MGST1    |  |  |  |
| MIB2     |  |  |  |
| MKNK2    |  |  |  |
| MLSTD1   |  |  |  |
| MOBKL2B  |  |  |  |
| MPP1     |  |  |  |
| MRCL3    |  |  |  |
| MRPS26   |  |  |  |
| MRPS30   |  |  |  |
| MSI2     |  |  |  |
| MSN      |  |  |  |
| MSX1     |  |  |  |
| MT1X     |  |  |  |
| MT2A     |  |  |  |
| MTP18    |  |  |  |
| MUM1L1   |  |  |  |
| MYADM    |  |  |  |
| MYBPC1   |  |  |  |
| MYBPHL   |  |  |  |
| MYLIP    |  |  |  |
| MYOZ3    |  |  |  |
| NAG6     |  |  |  |
| NAGPA    |  |  |  |
| NAP1L5   |  |  |  |
| NAPB     |  |  |  |
| NAPG     |  |  |  |
| NAT6     |  |  |  |
| NBPF10   |  |  |  |
| NBPF20   |  |  |  |
| NCALD    |  |  |  |
| NCALD    |  |  |  |
| NCDN     |  |  |  |
| NCOA1    |  |  |  |
| NCOA3    |  |  |  |

|           |  |  |  |
|-----------|--|--|--|
| NDRG2     |  |  |  |
| NDRG2     |  |  |  |
| NEDD4L    |  |  |  |
| NEFH      |  |  |  |
| NEFL      |  |  |  |
| NEFM      |  |  |  |
| NELL1     |  |  |  |
| NELL2     |  |  |  |
| NEUROD6   |  |  |  |
| NFIB      |  |  |  |
| NFKBIZ    |  |  |  |
| NGB       |  |  |  |
| NGEF      |  |  |  |
| NGFRAP1L1 |  |  |  |
| NLGN4Y    |  |  |  |
| NME5      |  |  |  |
| NMNAT2    |  |  |  |
| NOS2A     |  |  |  |
| NOV       |  |  |  |
| NOVA1     |  |  |  |
| NOXA1     |  |  |  |
| NP        |  |  |  |
| NPPA      |  |  |  |
| NPY       |  |  |  |
| NQO1      |  |  |  |
| NR2F1     |  |  |  |
| NR2F2     |  |  |  |
| NRIP3     |  |  |  |
| NRP1      |  |  |  |
| NSDHL     |  |  |  |
| NSF       |  |  |  |
| NSFL1C    |  |  |  |
| NTSR2     |  |  |  |
| NUDCD2    |  |  |  |
| NUDCD3    |  |  |  |
| NUDT14    |  |  |  |
| OAF       |  |  |  |
| OGDHL     |  |  |  |
| OLR1      |  |  |  |
| OPN3      |  |  |  |
| OPRK1     |  |  |  |
| OR2L13    |  |  |  |
| OSBP2     |  |  |  |
| OSBPL8    |  |  |  |



|         |  |  |  |
|---------|--|--|--|
| OVGP1   |  |  |  |
| OXR1    |  |  |  |
| P4HA1   |  |  |  |
| PABPC1  |  |  |  |
| PAK1    |  |  |  |
| PAK6    |  |  |  |
| PALLD   |  |  |  |
| PANX2   |  |  |  |
| PCDH10  |  |  |  |
| PCDH20  |  |  |  |
| PCDH7   |  |  |  |
| PCNT2   |  |  |  |
| PCNXL2  |  |  |  |
| PCP4    |  |  |  |
| PCSK1   |  |  |  |
| PCSK2   |  |  |  |
| PDE1B   |  |  |  |
| PDE7B   |  |  |  |
| PDE8B   |  |  |  |
| PDGFRA  |  |  |  |
| PDK4    |  |  |  |
| PDYN    |  |  |  |
| PDZD4   |  |  |  |
| PELI3   |  |  |  |
| PFKP    |  |  |  |
| PFTK1   |  |  |  |
| PGAP1   |  |  |  |
| PHF16   |  |  |  |
| PHF17   |  |  |  |
| PHGDHL1 |  |  |  |
| PHKA2   |  |  |  |
| PHYHIP  |  |  |  |
| PIAS2   |  |  |  |
| PIB5PA  |  |  |  |
| PICK1   |  |  |  |
| PIR     |  |  |  |
| PITPNC1 |  |  |  |
| PKD1    |  |  |  |
| PKD1    |  |  |  |
| PLCXD3  |  |  |  |
| PLEKHA6 |  |  |  |
| PLEKHC1 |  |  |  |
| PLOD1   |  |  |  |
| PLOD2   |  |  |  |

|           |  |  |  |
|-----------|--|--|--|
| PLOD3     |  |  |  |
| PLSCR4    |  |  |  |
| PLTP      |  |  |  |
| PLXDC2    |  |  |  |
| PNKD      |  |  |  |
| PNMA3     |  |  |  |
| PNMA6A    |  |  |  |
| POPDC3    |  |  |  |
| PPARGC1A  |  |  |  |
| PPEF1     |  |  |  |
| PPFIA4    |  |  |  |
| PPGB      |  |  |  |
| PPM1F     |  |  |  |
| PPM2C     |  |  |  |
| PPP1R13B  |  |  |  |
| PPP1R16B  |  |  |  |
| PPP1R3C   |  |  |  |
| PPP2R1A   |  |  |  |
| PRDX4     |  |  |  |
| PREPL     |  |  |  |
| PRICKLE1  |  |  |  |
| PRKCB1    |  |  |  |
| PRKCB1    |  |  |  |
| PRKCE     |  |  |  |
| PRKCG     |  |  |  |
| PRKDC     |  |  |  |
| PRKRIP1   |  |  |  |
| PRMT2     |  |  |  |
| ProSAPiP1 |  |  |  |
| PRPSAP2   |  |  |  |
| PRRT2     |  |  |  |
| PRRX1     |  |  |  |
| PTBP1     |  |  |  |
| PTD004    |  |  |  |
| PTGS2     |  |  |  |
| PTHR2     |  |  |  |
| PTK2B     |  |  |  |
| PTPLA     |  |  |  |
| PTPRR     |  |  |  |
| PTPRT     |  |  |  |
| PTPRZ1    |  |  |  |
| PTTG1IP   |  |  |  |
| PUNC      |  |  |  |
| PVALB     |  |  |  |

|           |  |  |  |
|-----------|--|--|--|
| PVRL3     |  |  |  |
| PYGB      |  |  |  |
| RAB11FIP3 |  |  |  |
| RAB11FIP5 |  |  |  |
| RAB33A    |  |  |  |
| RAB37     |  |  |  |
| RAB37     |  |  |  |
| RAB40C    |  |  |  |
| RAD23B    |  |  |  |
| RAGE      |  |  |  |
| RAI14     |  |  |  |
| RALGDS    |  |  |  |
| RANGAP1   |  |  |  |
| RAPGEF6   |  |  |  |
| RAPGEFL1  |  |  |  |
| RARA      |  |  |  |
| RARRES3   |  |  |  |
| RASAL1    |  |  |  |
| RASD2     |  |  |  |
| RASGEF1C  |  |  |  |
| RASGRP1   |  |  |  |
| RASIP1    |  |  |  |
| RASSF4    |  |  |  |
| RBED1     |  |  |  |
| RBM9      |  |  |  |
| RDH10     |  |  |  |
| RECQL5    |  |  |  |
| REEP6     |  |  |  |
| REXO1     |  |  |  |
| RGS12     |  |  |  |
| RGS2      |  |  |  |
| RGS4      |  |  |  |
| RGS7      |  |  |  |
| RHBDF2    |  |  |  |
| RHBDL1    |  |  |  |
| RHBDL3    |  |  |  |
| RHPN2     |  |  |  |
| RIMS4     |  |  |  |
| RLTPR     |  |  |  |
| RN7SK     |  |  |  |
| RND2      |  |  |  |
| RNF157    |  |  |  |
| RNF165    |  |  |  |
| RORB      |  |  |  |

|          |  |  |  |
|----------|--|--|--|
| RPIB9    |  |  |  |
| RPN2     |  |  |  |
| RPS15A   |  |  |  |
| RPS2     |  |  |  |
| RPS29    |  |  |  |
| RTN1     |  |  |  |
| RTN4     |  |  |  |
| RWDD2    |  |  |  |
| RXRA     |  |  |  |
| RXRB     |  |  |  |
| RYR2     |  |  |  |
| S100A10  |  |  |  |
| S100A16  |  |  |  |
| S100A8   |  |  |  |
| SAMD14   |  |  |  |
| SAPS3    |  |  |  |
| SAR1B    |  |  |  |
| SAT      |  |  |  |
| SBP1     |  |  |  |
| SC4MOL   |  |  |  |
| SCAMP5   |  |  |  |
| SCARA3   |  |  |  |
| SCARA3   |  |  |  |
| SCCPDH   |  |  |  |
| SCHIP1   |  |  |  |
| SCN1A    |  |  |  |
| SCN1B    |  |  |  |
| SCN2B    |  |  |  |
| SCN3B    |  |  |  |
| SCN4B    |  |  |  |
| SCNN1D   |  |  |  |
| SDF2L1   |  |  |  |
| SEMA3C   |  |  |  |
| SEMA5B   |  |  |  |
| SEP6     |  |  |  |
| SERPINA3 |  |  |  |
| SERTAD1  |  |  |  |
| SERTAD4  |  |  |  |
| SETBP1   |  |  |  |
| SETD1A   |  |  |  |
| SEZ6     |  |  |  |
| SF3A3    |  |  |  |
| SFMBT2   |  |  |  |
| SFRP1    |  |  |  |

|          |  |  |  |
|----------|--|--|--|
| SFT2D1   |  |  |  |
| SGK      |  |  |  |
| SH3D19   |  |  |  |
| SH3GL2   |  |  |  |
| SHD      |  |  |  |
| SKIP     |  |  |  |
| SLC15A3  |  |  |  |
| SLC16A3  |  |  |  |
| SLC16A9  |  |  |  |
| SLC17A6  |  |  |  |
| SLC25A12 |  |  |  |
| SLC25A27 |  |  |  |
| SLC25A29 |  |  |  |
| SLC25A37 |  |  |  |
| SLC29A1  |  |  |  |
| SLC2A5   |  |  |  |
| SLC32A1  |  |  |  |
| SLC35C2  |  |  |  |
| SLC39A10 |  |  |  |
| SLC4A8   |  |  |  |
| SLC6A17  |  |  |  |
| SLC6A7   |  |  |  |
| SLC7A2   |  |  |  |
| SLC7A6   |  |  |  |
| SLC7A8   |  |  |  |
| SLC9A1   |  |  |  |
| SLC9A5   |  |  |  |
| SLC9A9   |  |  |  |
| SLN      |  |  |  |
| SMCY     |  |  |  |
| SMYD2    |  |  |  |
| SNAP25   |  |  |  |
| SNAPC4   |  |  |  |
| SNCB     |  |  |  |
| SNCB     |  |  |  |
| SNHG5    |  |  |  |
| SNTB1    |  |  |  |
| SOCS2    |  |  |  |
| SOD2     |  |  |  |
| SORCS1   |  |  |  |
| SOX2     |  |  |  |
| SOX4     |  |  |  |
| SOX9     |  |  |  |
| SP110    |  |  |  |

|          |  |  |  |
|----------|--|--|--|
| SPARC    |  |  |  |
| SPTBN1   |  |  |  |
| SPTBN4   |  |  |  |
| SQLE     |  |  |  |
| SRC      |  |  |  |
| SRGN     |  |  |  |
| SSBP3    |  |  |  |
| SSBP4    |  |  |  |
| SST      |  |  |  |
| STAC2    |  |  |  |
| STAM     |  |  |  |
| STAMBPL1 |  |  |  |
| STARD10  |  |  |  |
| STAT4    |  |  |  |
| STEAP2   |  |  |  |
| STEAP2   |  |  |  |
| STK36    |  |  |  |
| STOX2    |  |  |  |
| STS-1    |  |  |  |
| STXBP1   |  |  |  |
| STXBP1   |  |  |  |
| STXBP5   |  |  |  |
| SULF1    |  |  |  |
| SVOP     |  |  |  |
| SYN2     |  |  |  |
| SYT13    |  |  |  |
| SYTL4    |  |  |  |
| TAC1     |  |  |  |
| TAC3     |  |  |  |
| TACC2    |  |  |  |
| TADA1L   |  |  |  |
| TADA3L   |  |  |  |
| TAGLN2   |  |  |  |
| TAGLN3   |  |  |  |
| TAP1     |  |  |  |
| TARBP1   |  |  |  |
| TCBA1    |  |  |  |
| TCEAL6   |  |  |  |
| TCEB2    |  |  |  |
| TCERG1L  |  |  |  |
| TCF4     |  |  |  |
| TESC     |  |  |  |
| TGFBRAP1 |  |  |  |
| TGM2     |  |  |  |

|          |  |  |  |
|----------|--|--|--|
| THBS3    |  |  |  |
| TIAM1    |  |  |  |
| TIMP1    |  |  |  |
| TLE2     |  |  |  |
| TM4SF1   |  |  |  |
| TMBIM1   |  |  |  |
| TMED10P  |  |  |  |
| TMEFF2   |  |  |  |
| TMEM117  |  |  |  |
| TMEM25   |  |  |  |
| TMUB2    |  |  |  |
| TNFRSF1A |  |  |  |
| TNFRSF25 |  |  |  |
| TNK2     |  |  |  |
| TNNT2    |  |  |  |
| TNPO1    |  |  |  |
| TNRC6A   |  |  |  |
| TOM1     |  |  |  |
| TOMM20   |  |  |  |
| TOX      |  |  |  |
| TRAK2    |  |  |  |
| TRIM24   |  |  |  |
| TRIM37   |  |  |  |
| TRIM37   |  |  |  |
| TRIP13   |  |  |  |
| TRPM2    |  |  |  |
| TSGA14   |  |  |  |
| TSPAN9   |  |  |  |
| TSPO     |  |  |  |
| TSPYL2   |  |  |  |
| TTC17    |  |  |  |
| TUBGCP5  |  |  |  |
| TWIST1   |  |  |  |
| TXNIP    |  |  |  |
| TYROBP   |  |  |  |
| UBA52    |  |  |  |
| UBE2L3   |  |  |  |
| UBE2O    |  |  |  |
| UBQLN4   |  |  |  |
| UCHL1    |  |  |  |
| UCHL3    |  |  |  |
| UCHL5    |  |  |  |
| UCRC     |  |  |  |
| UGCG     |  |  |  |

|         |  |  |  |
|---------|--|--|--|
| UGCGL2  |  |  |  |
| ULK1    |  |  |  |
| ULK1    |  |  |  |
| UNG2    |  |  |  |
| UNQ2541 |  |  |  |
| UPF2    |  |  |  |
| UPP1    |  |  |  |
| UQCRC1  |  |  |  |
| USF2    |  |  |  |
| USP13   |  |  |  |
| VAMP1   |  |  |  |
| VAMP1   |  |  |  |
| VAMP8   |  |  |  |
| VAV3    |  |  |  |
| VAV3    |  |  |  |
| VGFB    |  |  |  |
| VHL     |  |  |  |
| VIM     |  |  |  |
| VIP     |  |  |  |
| VIP     |  |  |  |
| VPS13C  |  |  |  |
| WAS     |  |  |  |
| WASF1   |  |  |  |
| WDR19   |  |  |  |
| WDR74   |  |  |  |
| WHDC1   |  |  |  |
| YAP1    |  |  |  |
| YBX1    |  |  |  |
| YPEL4   |  |  |  |
| YY1AP1  |  |  |  |
| ZADH2   |  |  |  |
| ZBTB16  |  |  |  |
| ZBTB16  |  |  |  |
| ZBTB40  |  |  |  |
| ZFP36   |  |  |  |
| ZFP36L1 |  |  |  |
| ZFYVE19 |  |  |  |
| ZHX2    |  |  |  |
| ZNF218  |  |  |  |
| ZNF248  |  |  |  |
| ZNF25   |  |  |  |
| ZNF265  |  |  |  |
| ZNF312  |  |  |  |
| ZNF358  |  |  |  |



| ZNF365                                       |                                                               |                                                        |                                                          |
|----------------------------------------------|---------------------------------------------------------------|--------------------------------------------------------|----------------------------------------------------------|
| ZNF385                                       |                                                               |                                                        |                                                          |
| ZNF540                                       |                                                               |                                                        |                                                          |
| ZNF659                                       |                                                               |                                                        |                                                          |
| ZNF689                                       |                                                               |                                                        |                                                          |
| ZSWIM4                                       |                                                               |                                                        |                                                          |
| ZYX                                          |                                                               |                                                        |                                                          |
| ZYX                                          |                                                               |                                                        |                                                          |
| <b>DEGs from Parikshak, N. et al. (2016)</b> | <b>Overlapping Genes with DEGs in Both Sexes (1045 genes)</b> | <b>Overlapping Genes with DEGs in Male (393 genes)</b> | <b>Overlapping genes with DEGs in Female (690 genes)</b> |
| A1BG                                         | ABCA5                                                         | ABCA3                                                  | AATK                                                     |
| AARS                                         | ABCA9                                                         | ABHD3                                                  | ABCA1                                                    |
| AASDHPPT                                     | ABCC12                                                        | ACAT2                                                  | ABCA2                                                    |
| AATK                                         | ABCC4                                                         | ACP2                                                   | ABCA3                                                    |
| ABCA1                                        | ABCC6                                                         | ACTN4                                                  | ABCA5                                                    |
| ABCA17P                                      | ABCG4                                                         | ADAM11                                                 | ABCA9                                                    |
| ABCA2                                        | ABHD16B                                                       | ADAM12                                                 | ABCC8                                                    |
| ABCA3                                        | ABHD2                                                         | ADAMTSL1                                               | ABCG4                                                    |
| ABCA5                                        | ABHD6                                                         | ADCK2                                                  | ABHD2                                                    |
| ABCA9                                        | ACAA2                                                         | ADCYAP1R1                                              | ABLIM2                                                   |
| ABCB1                                        | ACAT2                                                         | AEBP1                                                  | ACAT2                                                    |
| ABCC11                                       | ACLY                                                          | AFG3L2                                                 | ACLY                                                     |
| ABCC12                                       | ACOT13                                                        | AGTPBP1                                                | ACP2                                                     |
| ABCC4                                        | ACOX2                                                         | AKAP12                                                 | ACSS3                                                    |
| ABCC6                                        | ACP2                                                          | AMER3                                                  | ACTN4                                                    |
| ABCC8                                        | ACSS3                                                         | AMMECR1L                                               | ADAM11                                                   |
| ABCD1                                        | ADAM11                                                        | AMOT                                                   | ADAM12                                                   |
| ABCG2                                        | ADAM12                                                        | ANGPTL4                                                | ADAM9                                                    |
| ABCG4                                        | ADAM23                                                        | APBB2                                                  | ADAMTS12                                                 |
| ABHD10                                       | ADAM9                                                         | APMAP                                                  | ADARB2                                                   |
| ABHD12                                       | ADAMTS15                                                      | APOE                                                   | ADCYAP1R1                                                |
| ABHD16B                                      | ADAMTS4                                                       | AREL1                                                  | ADD2                                                     |
| ABHD17C                                      | ADAMTS9                                                       | ARHGAP20                                               | ADD3                                                     |
| ABHD2                                        | ADAMTSL1                                                      | ARHGAP44                                               | ADORA2B                                                  |
| ABHD3                                        | ADCK1                                                         | ARHGEF11                                               | ADTRP                                                    |
| ABHD4                                        | ADCK2                                                         | ARHGEF26                                               | AEBP1                                                    |
| ABHD5                                        | ADCYAP1R1                                                     | ARMC7                                                  | AGBL3                                                    |
| ABHD6                                        | ADD2                                                          | ARMCX4                                                 | AGL                                                      |
| ABI1                                         | ADH5                                                          | ARPC1B                                                 | AHNAK                                                    |
| ABLIM2                                       | ADI1                                                          | ARPC5L                                                 | AIFM1                                                    |
| ABTB1                                        | ADORA2B                                                       | ARRDC3                                                 | AK5                                                      |
| ABTB2                                        | ADTRP                                                         | ASAP2                                                  | AKAP12                                                   |
| ACAA2                                        | AEBP1                                                         | ATG14                                                  | AKAP6                                                    |

|             |          |          |          |
|-------------|----------|----------|----------|
| ACACA       | AFF1     | ATG2B    | ALDH7A1  |
| ACAD9       | AFG3L2   | ATP1A3   | AMOT     |
| ACADS       | AGK      | ATP1B1   | AMZ1     |
| ACADSB      | AGL      | ATRNL1   | ANGPT1   |
| ACAP2       | AHCYL2   | B4GALNT1 | ANK1     |
| ACAT2       | AIF1L    | BCAS3    | ANK3     |
| ACBD3       | AIFM1    | BCL11B   | ANKRD6   |
| ACKR3       | AKAP12   | BEND3    | ANKS1A   |
| ACLY        | AKAP6    | BNIP2    | ANXA2    |
| ACOT13      | AKR1A1   | BRAF     | ANXA5    |
| ACOT4       | ALDH7A1  | BRPF1    | AP5Z1    |
| ACOT7       | ALDH9A1  | BTBD19   | APBA2    |
| ACOX1       | AMER3    | BUD13    | APBB2    |
| ACOX2       | AMH      | C15orf39 | APOE     |
| ACP2        | AMIGO1   | C16orf58 | ARHGAP20 |
| ACRC        | AMOT     | C1QTNF4  | ARHGAP44 |
| ACSL5       | ANGPTL4  | C3orf70  | ARHGAP5  |
| ACSL6       | ANK1     | C4orf46  | ARHGEF11 |
| ACSS2       | ANKRD6   | C8orf46  | ARHGEF2  |
| ACSS3       | ANO6     | CABP1    | ARHGEF25 |
| ACTL6A      | ANXA2    | CACTIN   | ARHGEF40 |
| ACTL6B      | ANXA5    | CADPS2   | ARHGEF7  |
| ACTN4       | APBB2    | CALR     | ARIH2    |
| ACTR1A      | APMAP    | CAMK4    | ARL8A    |
| ACTR1B      | APOE     | CANX     | ARMC7    |
| ACTR3C      | AREL1    | CAPZA1   | ARMCX4   |
| ADAM11      | ARHGAP20 | CBL      | ARMCX6   |
| ADAM12      | ARHGAP42 | CCDC85C  | ARPC5L   |
| ADAM17      | ARHGEF11 | CCK      | ARRDC3   |
| ADAM22      | ARHGEF25 | CCNI     | ASAP2    |
| ADAM23      | ARHGEF26 | CCSER2   | ASNS     |
| ADAM32      | ARHGEF37 | CDC42EP4 | ATG4D    |
| ADAM8       | ARHGEF39 | CENPL    | ATP1A1   |
| ADAM9       | ARID5A   | CHD2     | ATP1A3   |
| ADAMTS12    | ARIH2    | CHD8     | ATP1B1   |
| ADAMTS15    | ARL6IP5  | CLK4     | ATP2B2   |
| ADAMTS4     | ARMC7    | CNOT6    | ATP2B3   |
| ADAMTS9     | ARMCX4   | CNTN2    | ATP8A2   |
| ADAMTS9-AS2 | ARPC1B   | CNTNAP1  | ATR      |
| ADAMTSL1    | ARRDC3   | COBLL1   | ATRN     |
| ADARB2      | ASNS     | COL1A1   | ATRNL1   |
| ADAT2       | ATG14    | COL8A2   | ATXN7L3B |
| ADCK1       | ATP10A   | COQ4     | BCCIP    |
| ADCK2       | ATP1B1   | COX4I1   | BCL6     |

|           |           |          |          |
|-----------|-----------|----------|----------|
| ADCK3     | ATP2B2    | CPE      | BEND3    |
| ADCY1     | ATP2B3    | CPEB3    | BMPR1A   |
| ADCY10    | ATP2C2    | CPNE4    | BNIP2    |
| ADCYAP1R1 | ATP6AP1   | CREB1    | BRAF     |
| ADD1      | ATP6V0A1  | CRMP1    | BRSK1    |
| ADD2      | ATP8A2    | CRY1     | BTBD19   |
| ADD3      | ATRNL1    | CRYM     | C16orf58 |
| ADH5      | ATXN7L3B  | CTTNBP2  | C1orf216 |
| ADII      | AZI2      | CYTH1    | C2CD5    |
| ADIRF     | B4GALNT1  | DARS     | C3orf70  |
| ADK       | B4GALT1   | DCC      | CA12     |
| ADM       | BAG3      | DCHS1    | CACHD1   |
| ADO       | BAZ1A     | DDHD2    | CACNG2   |
| ADORA1    | BCL2L2    | DDX42    | CADM1    |
| ADORA2B   | BDH1      | DENND2A  | CADM4    |
| ADPRH     | BHLHA15   | DFFA     | CADPS    |
| ADRA1A    | BICD1     | DHX36    | CADPS2   |
| ADRA1D    | BMP2K     | DIRAS2   | CALCOCO1 |
| ADRBK2    | BMP7      | DMXL1    | CALR     |
| ADSS      | BOLA3     | DNALI1   | CAMK4    |
| ADTRP     | BRAF      | DNASE2   | CAMKK1   |
| AEBP1     | BRD8      | DNLZ     | CAND2    |
| AEN       | BRPF1     | DNMBP    | CANX     |
| AES       | BTBD19    | DOPEY1   | CAPN1    |
| AFF1      | BTK       | DPH7     | CAPN2    |
| AFF4      | BUD13     | DTD1     | CBL      |
| AFG3L2    | C15orf39  | DTNA     | CBX7     |
| AFTPH     | C16orf58  | DTX2     | CCDC85C  |
| AGBL3     | C1orf228  | DUSP19   | CCK      |
| AGK       | C1orf74   | DYNC1H1  | CCSER2   |
| AGL       | C1QB      | DYNLL2   | CD163    |
| AGPAT2    | C1R       | EFNB1    | CD47     |
| AGTPBP1   | C20orf196 | EGLN1    | CD81     |
| AGTRAP    | C3orf70   | ELAVL2   | CD93     |
| AHCY      | C4orf19   | EML4     | CDC25A   |
| AHCYL1    | C5AR1     | EPB41L2  | CDC42EP4 |
| AHCYL2    | C5orf22   | EPHA5    | CDC42SE2 |
| AHNAK     | CA13      | ERAP1    | CDH1     |
| AHNAK2    | CACTIN    | ERCC6    | CDH6     |
| AIF1L     | CADM2     | EZH1     | CDHR2    |
| AIFM1     | CADPS     | FABP7    | CDK5     |
| AK3       | CADPS2    | FAM114A2 | CDKL2    |
| AK4       | CALR      | FAM131B  | CDKN2AIP |
| AK5       | CAMK4     | FAM171B  | CEBPZ    |

|            |          |         |         |
|------------|----------|---------|---------|
| AKAP11     | CAMKK1   | FANCM   | CEND1   |
| AKAP12     | CAPN1    | FASN    | CENPL   |
| AKAP13     | CAPN2    | FBXL17  | CHD2    |
| AKAP6      | CAPS2    | FBXO46  | CHI3L1  |
| AKNA       | CASP4    | FBXW9   | CHORDC1 |
| AKR1A1     | CAV2     | FCGR2A  | CHPT1   |
| AKR1C2     | CBFB     | FER     | CHRM1   |
| AKR1C3     | CBLN4    | FIBIN   | CHST11  |
| AKT3       | CBX7     | FLNA    | CHST7   |
| ALDH1L1    | CCDC113  | FLYWCH2 | CHSY1   |
| ALDH3B1    | CCDC151  | FOXJ1   | CLASP2  |
| ALDH7A1    | CCDC40   | FOXO1   | CLMP    |
| ALDH9A1    | CCDC51   | FRY     | CLSTN1  |
| ALG13      | CCDC62   | FTH1    | CLTA    |
| ALG5       | CCDC81   | FTL     | CLU     |
| ALKBH3     | CCDC90B  | FTSJ1   | CNTNAP1 |
| ALPK1      | CCNE1    | G3BP1   | CNTNAP2 |
| AMER3      | CCNG1    | GALNT11 | CNTNAP4 |
| AMH        | CCSER2   | GATM    | COL12A1 |
| AMIGO1     | CD163    | GDAP1   | COL16A1 |
| AMMECR1L   | CD302    | GHR     | COL1A1  |
| AMN1       | CD320    | GJA1    | COL25A1 |
| AMOT       | CD4      | GLCE    | COL27A1 |
| AMOTL2     | CD40     | GLT1D1  | COL4A2  |
| AMZ1       | CD47     | GLUD1   | COL6A1  |
| AMZ2P1     | CD59     | GPAM    | COL9A3  |
| ANAPC1     | CD63     | GPBP1   | COMMD9  |
| ANAPC13    | CDC14A   | GPD1    | COPG1   |
| ANAPC15    | CDC25A   | GPR158  | COQ3    |
| ANAPC5     | CDC42EP4 | GPSM1   | COX19   |
| ANAPC7     | CDC42SE2 | GRIA3   | CP      |
| ANGPT1     | CDC7     | GRIP1   | CPE     |
| ANGPTL4    | CDCA3    | HAGHL   | CPEB3   |
| ANK1       | CDK10    | HARBI1  | CPNE4   |
| ANK2       | CDK14    | HBB     | CREB1   |
| ANK3       | CDKL2    | HECTD1  | CRMP1   |
| ANKFN1     | CDS1     | HECW1   | CRY1    |
| ANKMY2     | CEND1    | HERC1   | CSE1L   |
| ANKRA2     | CENPL    | HERC3   | CSF1    |
| ANKRD18DP  | CEP112   | HID1    | CSMD1   |
| ANKRD29    | CEP89    | HMCN1   | CSNK1A1 |
| ANKRD32    | CEP97    | HNRNPU  | CSTF2   |
| ANKRD36    | CFD      | HSD3B7  | CTSC    |
| ANKRD36BP1 | CGRRF1   | HSP90B1 | CX3CR1  |

|          |         |          |         |
|----------|---------|----------|---------|
| ANKRD36C | CHD2    | HSPA12A  | CYBA    |
| ANKRD45  | CHD8    | HSPA5    | DAAM2   |
| ANKRD6   | CHPT1   | HSPB1    | DCAF17  |
| ANKS1A   | CHRDL1  | HSPD1    | DCC     |
| ANKS1B   | CHRN3   | IFT172   | DCHS1   |
| ANO6     | CHST11  | IGDCC4   | DDIT4   |
| ANP32E   | CHSY1   | IGLON5   | DDR2    |
| ANTXR2   | CIAO1   | INA      | DDX24   |
| ANXA2    | CLK4    | INTS5    | DDX42   |
| ANXA2P2  | CLMP    | IQSEC1   | DENND1C |
| ANXA5    | CLVS1   | IQSEC3   | DMXL1   |
| ANXA6    | CNDP1   | ITGB8    | DNAJB1  |
| ANXA7    | CNTNAP1 | KANSL1L  | DNAJC10 |
| AP1AR    | CNTNAP5 | KBTBD11  | DNAJC18 |
| AP2S1    | COL16A1 | KCNB1    | DNAJC2  |
| AP3M1    | COL1A1  | KCTD1    | DNM3    |
| AP3M2    | COL25A1 | KCTD12   | DOCK3   |
| AP3S1    | COL27A1 | KDM5A    | DOK5    |
| AP4B1    | COL4A2  | KDM6B    | DOPEY1  |
| AP5Z1    | COL6A1  | KIAA0368 | DOPEY2  |
| APBA2    | COMMD9  | KIAA0513 | DPH7    |
| APBA3    | COQ3    | KIAA1755 | DPYSL3  |
| APBB1    | COQ4    | KIAA1841 | DTNA    |
| APBB2    | COX19   | KIF21A   | DUSP3   |
| APEX1    | CP      | KIF7     | DYNC1L1 |
| APLP1    | CPE     | KIFAP3   | DYNLRB1 |
| APMAP    | CPEB4   | KLC4     | ECM1    |
| APOA1BP  | CPNE4   | KLF9     | EFEMP1  |
| APOBR    | CREG2   | KLHDC1   | EGLN1   |
| APOC1    | CRMP1   | KMT2C    | EID2    |
| APOE     | CRY1    | L3MBTL3  | EIF4E   |
| APOL6    | CSF2RB  | LAMB1    | EIF4H   |
| APP      | CSRP2   | LDB1     | ELAVL4  |
| APPBP2   | CTBS    | LIN54    | EMILIN1 |
| APPL1    | CXCL16  | LRCH2    | EML1    |
| AR       | CYB5D2  | LRP11    | EML6    |
| AREL1    | CYTH1   | LRRC40   | EMP1    |
| ARFGAP1  | CYTH4   | LSS      | EMP3    |
| ARFGAP3  | DALRD3  | LTN1     | ENPP2   |
| ARFGEF2  | DARS    | MAG      | EPB41L2 |
| ARFIP1   | DARS2   | MAL2     | EPHX1   |
| ARHGAP15 | DBH     | MAP1B    | EPS15   |
| ARHGAP18 | DBX2    | MCF2     | ERAP1   |
| ARHGAP20 | DCLRE1C | ME1      | ESYT1   |

|             |         |           |          |
|-------------|---------|-----------|----------|
| ARHGAP26    | DCP1A   | MED13     | ETV1     |
| ARHGAP30    | DCUN1D2 | MEF2C     | EXTL1    |
| ARHGAP31    | DDIT3   | MEN1      | EYA2     |
| ARHGAP42    | DDIT4   | METTTL22  | EZH1     |
| ARHGAP44    | DDR2    | MEX3D     | FABP5    |
| ARHGAP5     | DDX24   | MFN1      | FABP7    |
| ARHGAP5-AS1 | DDX42   | MFSD3     | FADS3    |
| ARHGAP6     | DEF6    | MIER3     | FAM107A  |
| ARHGDIG     | DENND1C | MLC1      | FAM114A2 |
| ARHGEF11    | DENND2C | MMAB      | FAM161A  |
| ARHGEF2     | DEPTOR  | MOAP1     | FAM168B  |
| ARHGEF25    | DFFA    | MSI2      | FAM171B  |
| ARHGEF26    | DHX29   | MTMR2     | FAM184A  |
| ARHGEF37    | DLGAP1  | MTMR4     | FAM212B  |
| ARHGEF39    | DMXL1   | NAA25     | FAM217B  |
| ARHGEF40    | DNAH2   | NAPEPLD   | FAM220A  |
| ARHGEF6     | DNAJB1  | NCAN      | FAM57A   |
| ARHGEF7     | DNAL1   | NDUFA10   | FAM69A   |
| ARHGEF9     | DNLZ    | NDUFS2    | FAM69B   |
| ARID3A      | DNM3    | NDUFS4    | FASN     |
| ARID5A      | DNTTIP2 | NF1       | FBLN5    |
| ARIH2       | DOK3    | NFIB      | FBXO30   |
| ARL1        | DOK5    | NHLRC3    | FCGRT    |
| ARL13B      | DPH2    | NHSL1     | FER      |
| ARL2BP      | DPP6    | NPAS3     | FERMT2   |
| ARL4D       | DPYSL3  | NPHP1     | FEZ1     |
| ARL6        | DSC2    | NREP      | FLNA     |
| ARL6IP5     | DSE     | NRIP3     | FLYWCH2  |
| ARL8A       | DSN1    | NRSN2     | FNDC3A   |
| ARL8B       | DTNA    | NSF       | FNDC3B   |
| ARMC1       | DUSP12  | NTN1      | FOCAD    |
| ARMC7       | DUSP19  | NTN3      | FOXO1    |
| ARMC8       | DUSP3   | NUDT21    | FSTL4    |
| ARMCX3      | DYNC1H1 | NUP98     | FTL      |
| ARMCX4      | DYNLRB1 | OGDH      | FYN      |
| ARMCX6      | ECHDC3  | OGDHL     | FZD8     |
| ARPC1A      | ECM1    | OSBPL11   | GABRA2   |
| ARPC1B      | EDN3    | OSTF1     | GABRB1   |
| ARPC5L      | EDNRB   | OTUD4     | GABRG1   |
| ARRDC3      | EFEMP1  | PABPC1L2A | GAP43    |
| ARRDC4      | EFNA5   | PALLD     | GARNL3   |
| ARSG        | EFNB1   | PARP2     | GARS     |
| ASAH2B      | EFR3A   | PCDH18    | GATM     |
| ASAP2       | EHD3    | PCSK2     | GDAP1    |

|          |          |          |         |
|----------|----------|----------|---------|
| ASAP3    | EIF2B5   | PDE1A    | GDI1    |
| ASB13    | EIF2D    | PEX5L    | GGCX    |
| ASB8     | EIF4E3   | PFKM     | GHITM   |
| ASCC2    | ELK1     | PHYHIP   | GJA1    |
| ASIC2    | ELK3     | PIK3C2B  | GJB2    |
| ASIC4    | ELMO1    | PIP5K1A  | GLCE    |
| ASMTL    | EMC9     | PLD3     | GLG1    |
| ASNS     | EMILIN1  | PLEKHM3  | GLRB    |
| ASPHD1   | EML1     | PLIN2    | GLT1D1  |
| ASPHD2   | EML6     | POP7     | GLUD1   |
| ASTN2    | EMP3     | POSTN    | GLYR1   |
| ASXL2    | ENPP5    | PPA1     | GMPR2   |
| ATAD1    | ENSA     | PPM1H    | GNB1    |
| ATAD3C   | EPB41L2  | PPP1R14B | GNL1    |
| ATF1     | EPB41L3  | PPP4R2   | GPBP1   |
| ATF7IP2  | EPDR1    | PRDM4    | GPR85   |
| ATG13    | EPHX1    | PREP     | GPSM1   |
| ATG14    | EPS8     | PRICKLE4 | GRIA3   |
| ATG16L1  | ERAP1    | PRUNE2   | GRIN2A  |
| ATG2B    | ERCC6    | PTPRD    | GRIP1   |
| ATG4D    | ESYT1    | PTPRZ1   | GUCY1A2 |
| ATHL1    | ETV1     | PYGL     | GXYLT1  |
| ATOH8    | EVC      | RALGAPA2 | GYPC    |
| ATP10A   | EVC2     | RBM12B   | HACL1   |
| ATP10B   | EXOC1    | RCN1     | HAGHL   |
| ATP10D   | EXOC3    | RCOR2    | HAPLN1  |
| ATP13A2  | EXTL1    | RCOR3    | HARS    |
| ATP1A1   | EYA2     | REPS2    | HAS2    |
| ATP1A3   | EZH2     | REV3L    | HBB     |
| ATP1B1   | FA2H     | RGS22    | HDAC1   |
| ATP2B1   | FABP5    | RHOBTB3  | HECTD3  |
| ATP2B2   | FABP7    | RHOQ     | HECW1   |
| ATP2B3   | FAF1     | RIMKLB   | HECW2   |
| ATP2C2   | FAHD2B   | RIOK1    | HERC1   |
| ATP5A1   | FAM107A  | RNASET2  | HERC2   |
| ATP5B    | FAM114A2 | RNF114   | HERC3   |
| ATP5C1   | FAM118B  | RNF169   | HHIP    |
| ATP5D    | FAM131B  | RNF182   | HIC1    |
| ATP5F1P5 | FAM161A  | RPH3A    | HNRNPU  |
| ATP5G3   | FAM168B  | RPL6     | HS2ST1  |
| ATP5O    | FAM172A  | RPLP0    | HSP90B1 |
| ATP6AP1  | FAM184A  | RPS2     | HSPA5   |
| ATP6AP1L | FAM20A   | RPS6KL1  | IAH1    |
| ATP6AP2  | FAM212B  | RSRC1    | ICAM1   |

|          |         |          |           |
|----------|---------|----------|-----------|
| ATP6V0A1 | FAM3C   | RTCB     | IFNAR1    |
| ATP6V0D1 | FAM46B  | RUSC1    | IFT172    |
| ATP6V0E1 | FAM46C  | RYK      | IGDCC4    |
| ATP6V1A  | FAM69A  | S100A10  | IGFBP2    |
| ATP6V1B2 | FAM71E1 | SAMD12   | IGFBP5    |
| ATP6V1C1 | FAM81A  | SASH1    | IL6ST     |
| ATP6V1D  | FANCM   | SCAI     | IMP3      |
| ATP6V1E1 | FANK1   | SDR39U1  | IMPAD1    |
| ATP8A2   | FARSA   | SEMA4C   | INIP      |
| ATP9A    | FARSB   | SERINC1  | INTS10    |
| ATPAF1   | FBLN7   | SERINC3  | INTS12    |
| ATR      | FBXL17  | SH2B2    | IQSEC1    |
| ATRN     | FBXO4   | SH3D19   | IQSEC3    |
| ATRNL1   | FBXO44  | SH3GL3   | IRF2BP1   |
| ATXN3    | FBXO9   | SLAIN2   | ITFG1     |
| ATXN7L3  | FCGR2A  | SLC10A4  | ITGB8     |
| ATXN7L3B | FCGRT   | SLC12A5  | ITIH3     |
| AUH      | FER     | SLC16A7  | ITPA      |
| AVPI1    | FERMT2  | SLC1A3   | ITPKC     |
| AXL      | FERMT3  | SLC24A2  | ITPR2     |
| AZI2     | FEZ1    | SLC25A4  | KANK1     |
| B3GNT1   | FGF11   | SLC25A46 | KANSL1L   |
| B4GALNT1 | FGFR4   | SLC26A11 | KATNAL1   |
| B4GALT1  | FGFRL1  | SLC2A12  | KBTBD3    |
| B4GALT6  | FIBP    | SLC35F3  | KCNA2     |
| BACE2    | FIGNL1  | SLC39A7  | KCNQ5     |
| BAG2     | FIS1    | SLC4A4   | KDELC2    |
| BAG3     | FLNA    | SLC50A1  | KDELR3    |
| BANF1    | FNIP2   | SLC6A11  | KIAA0368  |
| BANP     | FOCAD   | SLC6A17  | KIAA0513  |
| BAZ1A    | FRG1    | SLC9A6   | KIAA1324L |
| BBOX1    | FSD2    | SLITRK1  | KIAA1551  |
| BBS7     | FSTL4   | SLITRK3  | KIAA1755  |
| BCAM     | FTH1    | SLX4IP   | KIF1B     |
| BCAP29   | FTL     | SMC3     | KIF21A    |
| BCAR3    | FTO     | SMG1     | KIF7      |
| BCAS2    | FUT10   | SNAP91   | KLHDC3    |
| BCAS3    | FXR2    | SNX10    | KMT2C     |
| BCCIP    | FYN     | SOX4     | L3MBTL3   |
| BCDIN3D  | FZD8    | SPOCK2   | LAMB1     |
| BCL10    | G3BP1   | SRCIN1   | LAMC1     |
| BCL11A   | GABPB1  | SRGAP3   | LAP3      |
| BCL11B   | GABRA1  | SRSF11   | LATS2     |
| BCL2     | GABRB1  | STRA6    | LDB1      |



|           |         |          |         |
|-----------|---------|----------|---------|
| BCL2L1    | GABRG1  | STX3     | LHFPL2  |
| BCL2L11   | GADD45B | SUCLA2   | LMNB2   |
| BCL2L13   | GALM    | SUPT5H   | LRP11   |
| BCL2L2    | GALNT11 | SYNC     | LRRC20  |
| BCL3      | GALNT3  | SYNGR3   | LSS     |
| BCL6      | GARNL3  | SYNJ1    | LTBP1   |
| BCMO1     | GATM    | SYP      | LTBP4   |
| BDH1      | GBP2    | SYT13    | LTN1    |
| BECN1     | GDI1    | TAGLN3   | LYNX1   |
| BEND3     | GFRA2   | TBL1X    | MAL2    |
| BEND6     | GGH     | TCF12    | MAOA    |
| BEND7     | GHR     | TECPR2   | MAP1B   |
| BEX1      | GJA1    | TF       | MAP3K12 |
| BEX2      | GJB2    | TM6SF1   | MAP3K5  |
| BEX5      | GK5     | TMEM43   | MAP3K9  |
| BHLHA15   | GLG1    | TMEM63B  | MAP7D2  |
| BICD1     | GLRB    | TNKS1BP1 | MAPRE1  |
| BIRC3     | GLS2    | TRIM33   | MARK3   |
| BIVM      | GLUD1   | TRIM37   | MCF2    |
| BLMH      | GLYR1   | TRPS1    | MCL1    |
| BLVRA     | GMPR2   | TSC1     | MCM4    |
| BMF       | GOT1    | TSHR     | MDK     |
| BMP1      | GPAM    | TUBB     | ME2     |
| BMP2K     | GPBP1   | TUBGCP4  | ME3     |
| BMP7      | GPC4    | TXNDC9   | MED13   |
| BMPER     | GPD1L   | TXNIP    | MEF2C   |
| BMPR1A    | GPD2    | TYRO3    | METTL22 |
| BMPR1APS2 | GPI     | UBE3C    | MFN1    |
| BMPR1B    | GPR156  | UHRF2    | MICU1   |
| BNIP2     | GPR158  | UNC13A   | MIIP    |
| BNIP3L    | GPR160  | UNC13D   | MKI67   |
| BOLA3     | GPR85   | UNC80    | MKNK1   |
| BOP1      | GRAMD1B | USP14    | MLC1    |
| BRAF      | GRIK1   | USP19    | MMP11   |
| BRAFP1    | GRIN2A  | USP38    | MON2    |
| BRD7      | GSS     | VCPIP1   | MPPED1  |
| BRD8      | GTF3C6  | WDR1     | MPV17   |
| BRPF1     | GUCY1A2 | WDR17    | MRPS26  |
| BRSK1     | GXYLT1  | WDR36    | MTMR3   |
| BST2      | GYPC    | WDR54    | MVK     |
| BTBD10    | HACE1   | WSB1     | MYH9    |
| BTBD19    | HACL1   | XPO1     | MYO5A   |
| BTF3L4    | HAGHL   | YBX3     | MYOF    |
| BTG1      | HAPLN1  | ZFAND3   | NACC2   |

|           |           |         |           |
|-----------|-----------|---------|-----------|
| BTG2      | HARS      | ZFAND6  | NALCN     |
| BTG3      | HAUS8     | ZMYM2   | NAMPT     |
| BTK       | HAVCR2    | ZNF248  | NAPB      |
| BTN2A2    | HBB       | ZNF251  | NBEA      |
| BTN2A3P   | HCK       | ZNF316  | NCALD     |
| BTN3A1    | HDAC1     | ZNF426  | NCAN      |
| BTN3A3    | HECW1     | ZNF445  | NDFIP1    |
| BUD13     | HERC1     | ZSCAN21 | NDUFA4    |
| BZRAP1    | HERC3     |         | NDUFB9    |
| C10orf111 | HEYL      |         | NDUFS1    |
| C10orf118 | HIBCH     |         | NDUFS4    |
| C10orf35  | HIC1      |         | NEBL      |
| C10orf88  | HID1      |         | NEGR1     |
| C11orf24  | HINT1     |         | NELL2     |
| C11orf68  | HIPK3     |         | NEUROD6   |
| C11orf74  | HIST1H2AH |         | NFIB      |
| C11orf83  | HLA-DRB5  |         | NGEF      |
| C12orf10  | HMG20A    |         | NHLRC3    |
| C12orf23  | HMG20B    |         | NHSL1     |
| C12orf45  | HNRNPU    |         | NICN1     |
| C12orf52  | HP1BP3    |         | NID1      |
| C12orf68  | HPS6      |         | NIPA2     |
| C14orf2   | HS2ST1    |         | NNT       |
| C14orf23  | HSD11B1   |         | NOP58     |
| C15orf39  | HSF1      |         | NOTCH2    |
| C15orf61  | HSP90B1   |         | NPAS3     |
| C16orf45  | HSPA5     |         | NRBP2     |
| C16orf52  | HSPB1     |         | NREP      |
| C16orf58  | HSPD1     |         | NRIP3     |
| C16orf72  | ICAM1     |         | NSF       |
| C17orf67  | IDH1      |         | NTN1      |
| C19orf73  | IFNAR1    |         | NUAK1     |
| C1orf106  | IFT172    |         | NUCKS1    |
| C1orf112  | IGDCC4    |         | NUP98     |
| C1orf162  | IL10RA    |         | NUPR1     |
| C1orf174  | IL17RB    |         | NXPH1     |
| C1orf192  | IL33      |         | ODC1      |
| C1orf213  | IL4R      |         | OGDH      |
| C1orf216  | IMP3      |         | OPA1      |
| C1orf228  | INIP      |         | OSBPL11   |
| C1orf56   | INPP4A    |         | OTUD4     |
| C1orf74   | INPP5K    |         | OTX1      |
| C1orf86   | IPMK      |         | PABPC1L2A |
| C1QA      | IQSEC1    |         | PABPN1    |

|                |          |  |          |
|----------------|----------|--|----------|
| C1QB           | IQSEC3   |  | PAFAH1B1 |
| C1QC           | ITGB8    |  | PAICS    |
| C1QL1          | ITPKC    |  | PAIP2    |
| C1QTNF4        | ITPR2    |  | PALLD    |
| C1R            | KANSL3   |  | PAPD5    |
| C1S            | KATNAL1  |  | PARP2    |
| C2             | KCNA1    |  | PARP6    |
| C20orf166-AS1  | KCNA2    |  | PBXIP1   |
| C20orf196      | KCNAB1   |  | PCLO     |
| C20orf203      | KCNAB3   |  | PCP4     |
| C2CD4A         | KCNB2    |  | PCSK4    |
| C2CD5          | KCNE4    |  | PDCD6IP  |
| C2orf16        | KCNH8    |  | PDE4A    |
| C2orf49        | KCNJ3    |  | PDIA6    |
| C3AR1          | KCNQ5    |  | PEBP1    |
| C3orf18        | KCTD1    |  | PEPD     |
| C3orf49        | KIAA0368 |  | PEX5L    |
| C3orf62        | KIAA0513 |  | PFKM     |
| C3orf70        | KIAA1551 |  | PFKP     |
| C3orf80        | KIAA1755 |  | PGAP1    |
| C4A            | KIF21A   |  | PI4KA    |
| C4orf19        | KLC4     |  | PIGK     |
| C4orf27        | KLF9     |  | PIGL     |
| C4orf46        | KLHDC1   |  | PIH1D2   |
| C5AR1          | KLHDC2   |  | PINK1    |
| C5orf22        | KLHDC3   |  | PKN1     |
| C5orf42        | KLHL11   |  | PLCB1    |
| C5orf51        | KMT2C    |  | PLCB4    |
| C5orf64        | KPNA6    |  | PLD3     |
| C6orf106       | L3MBTL3  |  | PLEC     |
| C6orf118       | LACTB    |  | PLOD1    |
| C6orf136       | LAMC1    |  | PLXDC2   |
| C6orf211       | LAP3     |  | PLXNA2   |
| C6orf62        | LAT2     |  | PNMA2    |
| C6orf70        | LATS2    |  | PNP      |
| C7orf26        | LCA5     |  | POLR2B   |
| C7orf43        | LCP2     |  | POMGNT1  |
| C7orf55-LUC7L2 | LDB1     |  | POR      |
| C7orf61        | LGI2     |  | PPP1R14B |
| C8orf46        | LGI3     |  | PPP1R21  |
| C8orf82        | LGR4     |  | PPP1R3B  |
| C9orf37        | LHFPL2   |  | PPP1R9A  |
| C9orf72        | LIN54    |  | PPP2R2D  |
| C9orf84        | LMNB2    |  | PPP2R5A  |

|            |          |  |           |
|------------|----------|--|-----------|
| CA10       | LOXL2    |  | PREP      |
| CA12       | LOXL3    |  | PREX2     |
| CA13       | LPP      |  | PRICKLE4  |
| CA14       | LRP11    |  | PRKAR1A   |
| CAB39      | LRRC20   |  | PRKAR2B   |
| CABP1      | LRRIQ1   |  | PRKCB     |
| CACHD1     | LSP1     |  | PRPF40A   |
| CACNA2D2   | LSR      |  | PRPF4B    |
| CACNA2D3   | LSS      |  | PRR18     |
| CACNB1     | LTBP1    |  | PRUNE2    |
| CACNB4     | LTBR     |  | PSMB4     |
| CACNG2     | LYNX1    |  | PSMD1     |
| CACTIN     | MAD2L1BP |  | PTGES3    |
| CADM1      | MAG      |  | PTPRD     |
| CADM2      | MAGEE1   |  | PTPRZ1    |
| CADM4      | MAL2     |  | PUS10     |
| CADPS      | MALL     |  | QDPR      |
| CADPS2     | MAN1B1   |  | RAB11FIP5 |
| CAHM       | MAOB     |  | RAB2A     |
| CALCOCO1   | MAP2K5   |  | RAB3GAP2  |
| CALM2      | MAP2K7   |  | RAB3IL1   |
| CALM3      | MAP3K12  |  | RAD23A    |
| CALR       | MAP3K5   |  | RALGAPA1  |
| CAMK2B     | MAP3K8   |  | RALGAPA2  |
| CAMK2G     | MAP6D1   |  | RAMP2     |
| CAMK4      | MAP7D2   |  | RANBP3    |
| CAMKK1     | MAPK10   |  | RAP1B     |
| CAMKK2     | MAPKAPK3 |  | RASGRF1   |
| CAMTA1     | MAS1     |  | RB1       |
| CAND1      | MCC      |  | RBBP6     |
| CAND2      | MCF2     |  | RBM12B    |
| CANX       | MCL1     |  | RCN1      |
| CAP2       | ME1      |  | RCN3      |
| CAPG       | ME2      |  | RCOR3     |
| CAPN1      | ME3      |  | RDH10     |
| CAPN10-AS1 | MED21    |  | REPS2     |
| CAPN13     | MEF2C    |  | RET       |
| CAPN15     | MEN1     |  | REV3L     |
| CAPN2      | MEOX2    |  | RHBDF1    |
| CAPNS1     | MERTK    |  | RIMKLB    |
| CAPS2      | METTL22  |  | RNF112    |
| CAPZA1     | MFSD10   |  | RNF14     |
| CARD14     | MFSD3    |  | RNMT      |
| CARD9      | MID2     |  | ROGDI     |

|          |         |  |          |
|----------|---------|--|----------|
| CARHSP1  | MIIP    |  | RPL24    |
| CARKD    | MKNK1   |  | RPL6     |
| CARNS1   | MKX     |  | RPS2     |
| CASC10   | MLC1    |  | RPS6KL1  |
| CASC5    | MMAB    |  | RTCB     |
| CASD1    | MMP11   |  | RTN3     |
| CASP1    | MOAP1   |  | RYR2     |
| CASP4    | MOB1B   |  | S1PR1    |
| CASP7    | MORC3   |  | SALL3    |
| CASS4    | MPPED1  |  | SAMD12   |
| CAV2     | MRPL42  |  | SAT1     |
| CBFB     | MRPL55  |  | SCN8A    |
| CBL      | MRPS21  |  | SCN9A    |
| CBLN2    | MRPS23  |  | SDF2L1   |
| CBLN4    | MRPS9   |  | SEMA4C   |
| CBX7     | MSANTD4 |  | SEMA7A   |
| CCBE1    | MSX1    |  | SERINC1  |
| CCBL2    | MTF2    |  | SERINC3  |
| CCDC102A | MTHFD2  |  | SERPINH1 |
| CCDC104  | MTHFD2L |  | SESTD1   |
| CCDC109B | MTMR2   |  | SH3D19   |
| CCDC11   | MTMR3   |  | SH3GLB1  |
| CCDC113  | MTMR4   |  | SH3RF3   |
| CCDC115  | MXD1    |  | SLAIN2   |
| CCDC117  | MYBBP1A |  | SLC12A5  |
| CCDC120  | MYH7    |  | SLC15A3  |
| CCDC126  | MYO1F   |  | SLC16A7  |
| CCDC132  | MYOF    |  | SLC1A3   |
| CCDC136  | MYT1L   |  | SLC1A5   |
| CCDC151  | N4BP3   |  | SLC22A15 |
| CCDC154  | NAA25   |  | SLC24A2  |
| CCDC160  | NAA50   |  | SLC25A27 |
| CCDC178  | NADK    |  | SLC25A39 |
| CCDC18   | NAP1L3  |  | SLC25A46 |
| CCDC25   | NAPB    |  | SLC26A11 |
| CCDC36   | NAPEPLD |  | SLC29A4  |
| CCDC40   | NBEA    |  | SLC2A10  |
| CCDC51   | NBEAL2  |  | SLC2A12  |
| CCDC62   | NDUFA10 |  | SLC35B3  |
| CCDC73   | NDUFB2  |  | SLC35B4  |
| CCDC74B  | NDUFS1  |  | SLC35F3  |
| CCDC8    | NDUFS2  |  | SLC36A4  |
| CCDC81   | NEBL    |  | SLC38A5  |
| CCDC85C  | NEK3    |  | SLC3A2   |

|          |          |  |          |
|----------|----------|--|----------|
| CCDC90B  | NELL2    |  | SLC41A1  |
| CCIN     | NET1     |  | SLC4A4   |
| CCK      | NEXN     |  | SLC50A1  |
| CCM2     | NFATC1   |  | SLC6A11  |
| CCNE1    | NFATC2IP |  | SLC6A6   |
| CCNF     | NFE2L3   |  | SLC7A11  |
| CCNG1    | NFKB2    |  | SLC7A5   |
| CCNI     | NFU1     |  | SLC8A1   |
| CCNI2    | NGEF     |  | SLC9A9   |
| CCR10    | NICN1    |  | SMC3     |
| CCSER2   | NID1     |  | SMOX     |
| CD14     | NIPA2    |  | SMTN     |
| CD151    | NIPAL3   |  | SMYD2    |
| CD163    | NIT1     |  | SNAP91   |
| CD200    | NLN      |  | SNTG1    |
| CD274    | NMRAL1   |  | SNX10    |
| CD276    | NNT      |  | SOX4     |
| CD300A   | NPAS3    |  | SPHK1    |
| CD302    | NPHP1    |  | SRCIN1   |
| CD320    | NPL      |  | SRF      |
| CD34     | NPY5R    |  | SRGAP1   |
| CD4      | NREP     |  | SRRT     |
| CD40     | NRG1     |  | SS18     |
| CD44     | NRIP3    |  | ST18     |
| CD47     | NSF      |  | ST8SIA1  |
| CD53     | NTN3     |  | STK39    |
| CD58     | NUAK1    |  | STMN2    |
| CD59     | NUCKS1   |  | STMN3    |
| CD63     | NUDT18   |  | STRBP    |
| CD81     | NUSAP1   |  | STXBP4   |
| CD93     | NXT2     |  | SUMO3    |
| CD99     | OAF      |  | SUSD4    |
| CD99L2   | ODC1     |  | SVOP     |
| CD99P1   | OGDH     |  | SYNGR1   |
| CDC123   | OGDHL    |  | SYNGR3   |
| CDC14A   | OGG1     |  | SYNJ1    |
| CDC25A   | OLFM3    |  | SYNJ2    |
| CDC42    | OPA1     |  | SYT16    |
| CDC42EP4 | OPALIN   |  | SYT17    |
| CDC42SE1 | OPN3     |  | SYT4     |
| CDC42SE2 | OSBPL11  |  | TADA2B   |
| CDC7     | OSGEPL1  |  | TBC1D10B |
| CDCA3    | OSGIN1   |  | TBC1D22B |
| CDCA5    | OSMR     |  | TBR1     |

|            |           |  |           |
|------------|-----------|--|-----------|
| CDCP1      | OSTF1     |  | TDRKH     |
| CDH1       | OTUD4     |  | TEAD1     |
| CDH18      | OTUD7A    |  | TECPR2    |
| CDH6       | PABPC1L2A |  | TEP1      |
| CDHR2      | PABPC4    |  | TERF2IP   |
| CDHR3      | PAICS     |  | TES       |
| CDK10      | PALLD     |  | TFB1M     |
| CDK12      | PAPD5     |  | TGFB2     |
| CDK14      | PARD3B    |  | TGM2      |
| CDK2AP1    | PARL      |  | THBD      |
| CDK2AP2    | PARP2     |  | TIMP2     |
| CDK4       | PARP6     |  | TLE3      |
| CDK5       | PARP9     |  | TMC7      |
| CDKAL1     | PAX6      |  | TMEM14A   |
| CDKL2      | PBX4      |  | TMEM150C  |
| CDKN1A     | PBXIP1    |  | TMEM55A   |
| CDKN2AIP   | PCDHB14   |  | TMEM63B   |
| CDKN2AIPNL | PCDHB2    |  | TMX1      |
| CDKN2D     | PCGF5     |  | TMX4      |
| CDPF1      | PCP4      |  | TNFAIP8   |
| CDS1       | PCSK2     |  | TNFRSF11B |
| CDS2       | PCSK4     |  | TNFRSF1A  |
| CDT1       | PCSK5     |  | TNFRSF1B  |
| CEBPB      | PDE1A     |  | TNNT2     |
| CEBPD      | PDE4A     |  | TOMM20    |
| CEBPZ      | PDE6B     |  | TOPBP1    |
| CECR6      | PDGFC     |  | TOR1A     |
| CELSR1     | PDIA6     |  | TOX2      |
| CELSR2     | PEL3      |  | TRHDE     |
| CEND1      | PEX14     |  | TRIM33    |
| CENPL      | PEX5L     |  | TRIM36    |
| CEP112     | PFKM      |  | TRIM37    |
| CEP63      | PIGA      |  | TRIO      |
| CEP68      | PIGL      |  | TRIP10    |
| CEP70      | PIK3AP1   |  | TROVE2    |
| CEP85      | PIK3C2B   |  | TSEN34    |
| CEP89      | PIK3R4    |  | TTC28     |
| CEP97      | PIM1      |  | TTC37     |
| CERCAM     | PIN1      |  | TUBB      |
| CERK       | PIP5K1A   |  | TUBB4A    |
| CES3       | PIRT      |  | TUBGCP4   |
| CFD        | PITRM1    |  | TUBGCP5   |
| CFI        | PKN1      |  | TULP4     |
| CFLAR      | PKNOX1    |  | TYK2      |

|         |          |  |         |
|---------|----------|--|---------|
| CGRRF1  | PLA2G6   |  | UBAP2   |
| CH25H   | PLAUR    |  | UBE2H   |
| CHCHD1  | PLB1     |  | UBE2QL1 |
| CHCHD4  | PLCB1    |  | UBE2T   |
| CHD1    | PLCB4    |  | UBE3C   |
| CHD2    | PLCD4    |  | UBLCP1  |
| CHD8    | PLEKHG1  |  | UBR3    |
| CHGA    | PLEKHG2  |  | UBXN4   |
| CHGB    | PLEKHH1  |  | UCHL1   |
| CHI3L1  | PLEKHM3  |  | UFSP2   |
| CHIC1   | PLEKHO1  |  | UGGT1   |
| CHM     | PLLP     |  | UNC13A  |
| CHMP3   | PLSCR1   |  | UNC5C   |
| CHORDC1 | PLXDC1   |  | UNC80   |
| CHPT1   | PLXDC2   |  | USO1    |
| CHRDL1  | PMS1     |  | VEGFA   |
| CHRM1   | PNMA3    |  | VGLL4   |
| CHRM4   | PNRC2    |  | VPS41   |
| CHRN2   | PODN     |  | WDR1    |
| CHRN3   | POFUT1   |  | WDR17   |
| CHST11  | POLE3    |  | WDR36   |
| CHST3   | POLR2B   |  | WDR7    |
| CHST7   | POMGNT1  |  | WDR75   |
| CHSY1   | PON2     |  | WLS     |
| CHUK    | POP7     |  | WSB1    |
| CIAO1   | POR      |  | YPEL3   |
| CIAPIN1 | PPA1     |  | ZBTB33  |
| CIDEA   | PPA2     |  | ZC3H6   |
| CIDECF  | PPARA    |  | ZCWPW2  |
| CIITA   | PPAT     |  | ZEB1    |
| CINP    | PPIL6    |  | ZFAND6  |
| CIRBP   | PPM1H    |  | ZFYVE9  |
| CISD1   | PPM1L    |  | ZMAT2   |
| CKMT1B  | PPP1R14C |  | ZMYM2   |
| CLASP2  | PPP1R21  |  | ZNF180  |
| CLCN3   | PPP1R3B  |  | ZNF251  |
| CLCN4   | PPP2R2D  |  | ZNF518B |
| CLDN10  | PPP2R5A  |  | ZNF536  |
| CLDN18  | PREP     |  | ZNF579  |
| CLEC2L  | PREX2    |  | ZNF740  |
| CLIC1   | PRICKLE1 |  | ZSCAN21 |
| CLIP1   | PRKAR1B  |  |         |
| CLK4    | PRKCB    |  |         |
| CLMP    | PRKD3    |  |         |



|          |          |  |  |
|----------|----------|--|--|
| CLP1     | PRR22    |  |  |
| CLPX     | PRSS35   |  |  |
| CLSPN    | PSD4     |  |  |
| CLSTN1   | PSMB8    |  |  |
| CLSTN3   | PSMC3    |  |  |
| CLTA     | PSMD1    |  |  |
| CLTC     | PSPH     |  |  |
| CLU      | PSTPIP1  |  |  |
| CLUHP3   | PTH2R    |  |  |
| CLVS1    | PTPN1    |  |  |
| CLVS2    | PTPN22   |  |  |
| CMAS     | PTPN6    |  |  |
| CMC2     | PTPRC    |  |  |
| CMTM3    | PTPRD    |  |  |
| CMTM5    | PTPRZ1   |  |  |
| CMTM6    | PVALB    |  |  |
| CNDP1    | PYCR1    |  |  |
| CNIH3    | PYGL     |  |  |
| CNN2     | PYGO1    |  |  |
| CNN3     | QRFPR    |  |  |
| CNNM1    | RAB13    |  |  |
| CNOT6    | RAB27A   |  |  |
| CNP      | RAB3GAP2 |  |  |
| CNRIP1   | RAB3IL1  |  |  |
| CNTLN    | RALGAPA1 |  |  |
| CNTN2    | RAMP2    |  |  |
| CNTNAP1  | RANBP1   |  |  |
| CNTNAP2  | RANBP3   |  |  |
| CNTNAP4  | RANGAP1  |  |  |
| CNTNAP5  | RAP1B    |  |  |
| COA1     | RASAL3   |  |  |
| COBLL1   | RASGRF1  |  |  |
| COL12A1  | RASGRP1  |  |  |
| COL14A1  | RASSF8   |  |  |
| COL16A1  | RAVER2   |  |  |
| COL19A1  | RB1      |  |  |
| COL1A1   | RBFOX1   |  |  |
| COL25A1  | RBM12B   |  |  |
| COL27A1  | RBM47    |  |  |
| COL4A1   | RCAN2    |  |  |
| COL4A2   | RCN1     |  |  |
| COL4A3BP | RCN3     |  |  |
| COL4A5   | RCOR2    |  |  |
| COL6A1   | RCOR3    |  |  |

|          |         |  |  |
|----------|---------|--|--|
| COL7A1   | RECQL4  |  |  |
| COL8A1   | REPS2   |  |  |
| COL8A2   | RET     |  |  |
| COL9A3   | RFXANK  |  |  |
| COLGALT1 | RGS14   |  |  |
| COMMD9   | RGS16   |  |  |
| COPG1    | RGS2    |  |  |
| COPS3    | RGS22   |  |  |
| COPS4    | RGS6    |  |  |
| COPS5    | RHBDF1  |  |  |
| COPS6    | RHOBTB3 |  |  |
| COPS7A   | RILP    |  |  |
| COQ3     | RIMKLB  |  |  |
| COQ4     | RIN3    |  |  |
| COQ6     | RINT1   |  |  |
| CORO2A   | RIOK1   |  |  |
| CORO2B   | RNF112  |  |  |
| COTL1    | RNF114  |  |  |
| COX19    | RNF144A |  |  |
| COX4I1   | RNF146  |  |  |
| COX5A    | RNF167  |  |  |
| COX5B    | RNF169  |  |  |
| COX6C    | RNF34   |  |  |
| COX7A1   | RNF5    |  |  |
| COX7A2   | ROGDI   |  |  |
| COX7A2L  | RPAIN   |  |  |
| CP       | RPL24   |  |  |
| CPAMD8   | RPL27A  |  |  |
| CPE      | RPL28   |  |  |
| CPEB3    | RPL6    |  |  |
| CPEB4    | RPLP0   |  |  |
| CPLX1    | RPN2    |  |  |
| CPLX2    | RPRD1B  |  |  |
| CPNE3    | RPS2    |  |  |
| CPNE4    | RPS6KL1 |  |  |
| CPNE9    | RRAS    |  |  |
| CPOX     | RSU1    |  |  |
| CPT1A    | RTCA    |  |  |
| CRADD    | RTCB    |  |  |
| CREB1    | RUFY2   |  |  |
| CREG2    | RUNX1   |  |  |
| CREM     | RWDD2B  |  |  |
| CRH      | RYK     |  |  |
| CRHR2    | RYR2    |  |  |

|          |          |  |  |
|----------|----------|--|--|
| CRK      | S100A9   |  |  |
| CRKL     | S1PR5    |  |  |
| CRMP1    | SAMD12   |  |  |
| CRTAC1   | SAMD5    |  |  |
| CRY1     | SAMD8    |  |  |
| CRYM     | SAMHD1   |  |  |
| CSE1L    | SARDH    |  |  |
| CSF1     | SBNO2    |  |  |
| CSF2RB   | SCG5     |  |  |
| CSMD1    | SCN4B    |  |  |
| CSNK1A1  | SCN8A    |  |  |
| CSPP1    | SCRN2    |  |  |
| CSRP2    | SDC1     |  |  |
| CSRP2BP  | SDC2     |  |  |
| CSTB     | SDF4     |  |  |
| CSTF2    | SDHA     |  |  |
| CTBS     | SDS      |  |  |
| CTCF     | SDSL     |  |  |
| CTH      | SEMA4C   |  |  |
| CTNNBIP1 | SENP2    |  |  |
| CTPS1    | SERINC3  |  |  |
| CTR9     | SERPINB9 |  |  |
| CTSC     | SERPINE1 |  |  |
| CTSH     | SERPINH1 |  |  |
| CTSS     | SERTAD2  |  |  |
| CTTNBP2  | SESN2    |  |  |
| CTXN3    | SFXN4    |  |  |
| CUBN     | SH2D4A   |  |  |
| CUEDC2   | SH3GL2   |  |  |
| CUL1     | SH3GL3   |  |  |
| CUL2     | SHROOM4  |  |  |
| CUZD1    | SIAE     |  |  |
| CX3CR1   | SLAIN2   |  |  |
| CXCL16   | SLC10A4  |  |  |
| CXCL5    | SLC12A5  |  |  |
| CXCR4    | SLC12A8  |  |  |
| CXorf22  | SLC15A3  |  |  |
| CXorf40A | SLC16A7  |  |  |
| CXorf40B | SLC17A5  |  |  |
| CYB5B    | SLC17A9  |  |  |
| CYB5D2   | SLC1A3   |  |  |
| CYB5R2   | SLC22A15 |  |  |
| CYBA     | SLC24A2  |  |  |
| CYBRD1   | SLC25A20 |  |  |

|           |          |  |  |
|-----------|----------|--|--|
| CYC1      | SLC25A40 |  |  |
| CYFIP2    | SLC25A46 |  |  |
| CYP11A1   | SLC26A11 |  |  |
| CYP26B1   | SLC2A10  |  |  |
| CYP2C8    | SLC2A4   |  |  |
| CYP4F11   | SLC35B4  |  |  |
| CYP4X1    | SLC35F3  |  |  |
| CYSTM1    | SLC38A5  |  |  |
| CYTH1     | SLC39A1  |  |  |
| CYTH2     | SLC39A12 |  |  |
| CYTH4     | SLC3A2   |  |  |
| DAAM2     | SLC43A1  |  |  |
| DACH1     | SLC43A3  |  |  |
| DACT2     | SLC4A11  |  |  |
| DALRD3    | SLC4A4   |  |  |
| DARS      | SLC4A8   |  |  |
| DARS2     | SLC50A1  |  |  |
| DBC1      | SLC5A2   |  |  |
| DBH       | SLC6A11  |  |  |
| DBI       | SLC6A17  |  |  |
| DBX2      | SLC6A6   |  |  |
| DCAF13    | SLC7A5   |  |  |
| DCAF17    | SLC7A8   |  |  |
| DCAF4L1   | SLC8A1   |  |  |
| DCAF8     | SLC9B2   |  |  |
| DCC       | SLITRK1  |  |  |
| DCHS1     | SMAD4    |  |  |
| DCLK1     | SMAD5    |  |  |
| DCLRE1C   | SMIM14   |  |  |
| DCP1A     | SMNDC1   |  |  |
| DCTN1     | SMTN     |  |  |
| DCTN1-AS1 | SMUG1    |  |  |
| DCTN2     | SMURF2   |  |  |
| DCTN6     | SNAP91   |  |  |
| DCUN1D2   | SNRPG    |  |  |
| DCUN1D4   | SNTG1    |  |  |
| DDAH1     | SNX10    |  |  |
| DDAH2     | SNX18    |  |  |
| DDHD2     | SOAT1    |  |  |
| DDIT3     | SOCS5    |  |  |
| DDIT4     | SOD2     |  |  |
| DDR2      | SOX4     |  |  |
| DDX1      | SP110    |  |  |
| DDX21     | SPATS2L  |  |  |

|         |         |  |  |
|---------|---------|--|--|
| DDX24   | SPDEF   |  |  |
| DDX3Y   | SPHK1   |  |  |
| DDX42   | SPTY2D1 |  |  |
| DEF6    | SRD5A3  |  |  |
| DEGS2   | SRPK2   |  |  |
| DENND1C | SRRM4   |  |  |
| DENND2A | SRRT    |  |  |
| DENND2C | SS18    |  |  |
| DEPDC5  | SSX2IP  |  |  |
| DEPTOR  | ST14    |  |  |
| DERL1   | ST18    |  |  |
| DERL2   | ST3GAL5 |  |  |
| DERL3   | STAM    |  |  |
| DES     | STARD8  |  |  |
| DFFA    | STIP1   |  |  |
| DFNB59  | STK16   |  |  |
| DGKI    | STK17B  |  |  |
| DHCR24  | STOM    |  |  |
| DHDDS   | STPG1   |  |  |
| DHPS    | STRA6   |  |  |
| DHRS11  | STRN    |  |  |
| DHX29   | STX1A   |  |  |
| DHX30   | STXBP4  |  |  |
| DHX34   | STYX    |  |  |
| DHX35   | STYXL1  |  |  |
| DHX36   | SUCLG1  |  |  |
| DHX57   | SUMO3   |  |  |
| DIO1    | SUPT5H  |  |  |
| DIRAS1  | SUPV3L1 |  |  |
| DIRAS2  | SUV39H1 |  |  |
| DLAT    | SV2A    |  |  |
| DLEC1   | SYNC    |  |  |
| DLG1    | SYNGR1  |  |  |
| DLG3    | SYNGR3  |  |  |
| DLGAP1  | SYNJ1   |  |  |
| DLK2    | SYNJ2   |  |  |
| DMPK    | SYNPO2  |  |  |
| DMRTA1  | SYP     |  |  |
| DMXL1   | SYPL2   |  |  |
| DMXL2   | SYT13   |  |  |
| DNAH10  | SYT16   |  |  |
| DNAH11  | SYT17   |  |  |
| DNAH2   | TAB2    |  |  |
| DNAJA4  | TADA2B  |  |  |

|             |          |  |  |
|-------------|----------|--|--|
| DNAJB1      | TAGLN2   |  |  |
| DNAJC1      | TAGLN3   |  |  |
| DNAJC10     | TBC1D10A |  |  |
| DNAJC16     | TBC1D22B |  |  |
| DNAJC17     | TBC1D25  |  |  |
| DNAJC18     | TBC1D30  |  |  |
| DNAJC2      | TBK1     |  |  |
| DNAJC27-AS1 | TBR1     |  |  |
| DNAJC3      | TBRG1    |  |  |
| DNAJC6      | TBX15    |  |  |
| DNALI1      | TECPR2   |  |  |
| DNASE1L2    | TERF2IP  |  |  |
| DNASE2      | TFB1M    |  |  |
| DND1P1      | TG       |  |  |
| DNLZ        | TGIF1    |  |  |
| DNM1        | TGM2     |  |  |
| DNM1L       | THAP1    |  |  |
| DNM3        | THAP7    |  |  |
| DNMBP       | THBD     |  |  |
| DNTTIP2     | TIMM17A  |  |  |
| DOCK2       | TIPARP   |  |  |
| DOCK3       | TKT      |  |  |
| DOCK6       | TLE3     |  |  |
| DOCK7       | TLR5     |  |  |
| DOHH        | TMC5     |  |  |
| DOK3        | TMC7     |  |  |
| DOK5        | TMCO4    |  |  |
| DOPEY1      | TMED3    |  |  |
| DOPEY2      | TMEM120A |  |  |
| DPH2        | TMEM144  |  |  |
| DPH7        | TMEM167B |  |  |
| DPP10       | TMEM175  |  |  |
| DPP6        | TMEM176A |  |  |
| DPP8        | TMEM178A |  |  |
| DPP9        | TMEM185B |  |  |
| DPY19L2     | TMEM255A |  |  |
| DPY19L2P1   | TMEM30A  |  |  |
| DPY19L2P2   | TMEM38A  |  |  |
| DPYSL3      | TMEM43   |  |  |
| DRAXIN      | TMEM63A  |  |  |
| DRG1        | TMX1     |  |  |
| DSC2        | TNFRSF1A |  |  |
| DSE         | TNFRSF1B |  |  |
| DSN1        | TNIP1    |  |  |

|           |           |  |  |
|-----------|-----------|--|--|
| DSTN      | TNKS1BP1  |  |  |
| DTD1      | TOR1A     |  |  |
| DTNA      | TOR1AIP2  |  |  |
| DTWD2     | TPD52L2   |  |  |
| DTX2      | TPI1      |  |  |
| DTX3      | TPST1     |  |  |
| DTX3L     | TRAIP     |  |  |
| DTX4      | TRAM1L1   |  |  |
| DTYMK     | TRAPPC10  |  |  |
| DUS2L     | TRHDE     |  |  |
| DUSP12    | TRIM14    |  |  |
| DUSP19    | TRIM37    |  |  |
| DUSP3     | TRIP13    |  |  |
| DYNC1H1   | TRPC3     |  |  |
| DYNC1LI1  | TRPS1     |  |  |
| DYNC2LI1  | TSC1      |  |  |
| DYNLL2    | TTC23     |  |  |
| DYNLRB1   | TTC28     |  |  |
| DYNLT1    | TTC37     |  |  |
| DYRK3     | TTC38     |  |  |
| E2F1      | TTL       |  |  |
| EBNA1BP2  | TTPA      |  |  |
| ECE1      | TUBB4A    |  |  |
| ECHDC3    | TUBGCP4   |  |  |
| ECI2      | TUSC3     |  |  |
| ECM1      | TYRO3     |  |  |
| EDA       | UBAP2     |  |  |
| EDN3      | UBE2E3    |  |  |
| EDNRB     | UBE2H     |  |  |
| EEF1A1P11 | UBE2QL1   |  |  |
| EEF1A1P8  | UBE3C     |  |  |
| EEFSEC    | UBXN4     |  |  |
| EFCAB12   | UFSP2     |  |  |
| EFEMP1    | UGT8      |  |  |
| EFEMP2    | UHRF1BP1L |  |  |
| EFNA5     | UNC13A    |  |  |
| EFNB1     | UNC5C     |  |  |
| EFR3A     | UNC80     |  |  |
| EGLN1     | UPP1      |  |  |
| EGLN3     | UROD      |  |  |
| EHBP1L1   | USHBP1    |  |  |
| EHD1      | USO1      |  |  |
| EHD3      | USP38     |  |  |
| EHHADH    | USP39     |  |  |

|          |         |  |  |
|----------|---------|--|--|
| EID2     | USP42   |  |  |
| EID2B    | USP48   |  |  |
| EIF2AK1  | UVRAG   |  |  |
| EIF2AP4  | VAMP8   |  |  |
| EIF2B1   | VAPB    |  |  |
| EIF2B3   | VASP    |  |  |
| EIF2B5   | VCPIP1  |  |  |
| EIF2D    | VHL     |  |  |
| EIF3E    | VIP     |  |  |
| EIF3F    | VPS33B  |  |  |
| EIF3J    | VSTM5   |  |  |
| EIF3K    | VWA2    |  |  |
| EIF4A2   | VWA3B   |  |  |
| EIF4E    | WDR1    |  |  |
| EIF4E2   | WDR17   |  |  |
| EIF4E3   | WDR36   |  |  |
| EIF4EBP1 | WDR7    |  |  |
| EIF4G3   | WDR77   |  |  |
| EIF4H    | WDR91   |  |  |
| EIF5A2   | WDYHV1  |  |  |
| ELAVL2   | WFS1    |  |  |
| ELAVL4   | XPO6    |  |  |
| ELF4     | XRCC6   |  |  |
| ELK1     | ZBBX    |  |  |
| ELK3     | ZBED5   |  |  |
| ELMO1    | ZBTB42  |  |  |
| ELMOD2   | ZC3H12A |  |  |
| ELMSAN1  | ZC3H6   |  |  |
| ELOVL1   | ZCCHC11 |  |  |
| ELOVL2   | ZEB1    |  |  |
| ELOVL4   | ZFAND6  |  |  |
| ELOVL5   | ZMAT4   |  |  |
| ELP2     | ZMYM2   |  |  |
| ELP6     | ZNF133  |  |  |
| EMC8     | ZNF157  |  |  |
| EMC9     | ZNF251  |  |  |
| EME2     | ZNF287  |  |  |
| EMILIN1  | ZNF365  |  |  |
| EMILIN3  | ZNF385B |  |  |
| EML1     | ZNF385D |  |  |
| EML2     | ZNF426  |  |  |
| EML4     | ZNF445  |  |  |
| EML6     | ZNF518B |  |  |
| EMP1     | ZSCAN21 |  |  |



|         |  |  |  |
|---------|--|--|--|
| EMP3    |  |  |  |
| EMX2    |  |  |  |
| EMX2OS  |  |  |  |
| ENAH    |  |  |  |
| ENDOV   |  |  |  |
| ENKUR   |  |  |  |
| ENO2    |  |  |  |
| ENOPH1  |  |  |  |
| ENOSF1  |  |  |  |
| ENPP2   |  |  |  |
| ENPP5   |  |  |  |
| ENPP6   |  |  |  |
| ENSA    |  |  |  |
| ENTPD4  |  |  |  |
| ENY2    |  |  |  |
| EPB41L2 |  |  |  |
| EPB41L3 |  |  |  |
| EPCAM   |  |  |  |
| EPDR1   |  |  |  |
| EPHA5   |  |  |  |
| EPHA8   |  |  |  |
| EPHB6   |  |  |  |
| EPHX1   |  |  |  |
| EPHX4   |  |  |  |
| EPS15   |  |  |  |
| EPS8    |  |  |  |
| ERAL1   |  |  |  |
| ERAP1   |  |  |  |
| ERBB2   |  |  |  |
| ERBB3   |  |  |  |
| ERCC4   |  |  |  |
| ERCC6   |  |  |  |
| ERGIC3  |  |  |  |
| ERI1    |  |  |  |
| ERLIN1  |  |  |  |
| ERLIN2  |  |  |  |
| ERMN    |  |  |  |
| ERO1LB  |  |  |  |
| ESR1    |  |  |  |
| ESRRG   |  |  |  |
| ESYT1   |  |  |  |
| ETNK2   |  |  |  |
| ETS2    |  |  |  |
| ETV1    |  |  |  |

|          |  |  |  |
|----------|--|--|--|
| ETV3     |  |  |  |
| EVC      |  |  |  |
| EVC2     |  |  |  |
| EXO5     |  |  |  |
| EXOC1    |  |  |  |
| EXOC3    |  |  |  |
| EXOSC6   |  |  |  |
| EXOSC9   |  |  |  |
| EXTL1    |  |  |  |
| EXTL2    |  |  |  |
| EXTL3    |  |  |  |
| EYA2     |  |  |  |
| EYA4     |  |  |  |
| EZH1     |  |  |  |
| EZH2     |  |  |  |
| EZR      |  |  |  |
| F2R      |  |  |  |
| F3       |  |  |  |
| FA2H     |  |  |  |
| FAAH     |  |  |  |
| FABP5    |  |  |  |
| FABP7    |  |  |  |
| FADS3    |  |  |  |
| FADS6    |  |  |  |
| FAF1     |  |  |  |
| FAF2     |  |  |  |
| FAH      |  |  |  |
| FAHD2A   |  |  |  |
| FAHD2B   |  |  |  |
| FAHD2CP  |  |  |  |
| FAM101A  |  |  |  |
| FAM101B  |  |  |  |
| FAM102B  |  |  |  |
| FAM105B  |  |  |  |
| FAM107A  |  |  |  |
| FAM110A  |  |  |  |
| FAM114A2 |  |  |  |
| FAM115B  |  |  |  |
| FAM117A  |  |  |  |
| FAM118B  |  |  |  |
| FAM120C  |  |  |  |
| FAM122C  |  |  |  |
| FAM126A  |  |  |  |
| FAM129A  |  |  |  |

|             |  |  |  |
|-------------|--|--|--|
| FAM129B     |  |  |  |
| FAM131B     |  |  |  |
| FAM131C     |  |  |  |
| FAM133A     |  |  |  |
| FAM134A     |  |  |  |
| FAM134B     |  |  |  |
| FAM13A-AS1  |  |  |  |
| FAM13C      |  |  |  |
| FAM150B     |  |  |  |
| FAM161A     |  |  |  |
| FAM168B     |  |  |  |
| FAM171B     |  |  |  |
| FAM172A     |  |  |  |
| FAM174A     |  |  |  |
| FAM175A     |  |  |  |
| FAM179B     |  |  |  |
| FAM181A     |  |  |  |
| FAM181A-AS1 |  |  |  |
| FAM184A     |  |  |  |
| FAM192A     |  |  |  |
| FAM203A     |  |  |  |
| FAM207A     |  |  |  |
| FAM20A      |  |  |  |
| FAM20C      |  |  |  |
| FAM212B     |  |  |  |
| FAM216A     |  |  |  |
| FAM217B     |  |  |  |
| FAM219A     |  |  |  |
| FAM220A     |  |  |  |
| FAM221A     |  |  |  |
| FAM228A     |  |  |  |
| FAM27D1     |  |  |  |
| FAM3C       |  |  |  |
| FAM3C2      |  |  |  |
| FAM43B      |  |  |  |
| FAM46A      |  |  |  |
| FAM46B      |  |  |  |
| FAM46C      |  |  |  |
| FAM49B      |  |  |  |
| FAM57A      |  |  |  |
| FAM58A      |  |  |  |
| FAM63B      |  |  |  |
| FAM65C      |  |  |  |
| FAM66B      |  |  |  |

|          |  |  |  |
|----------|--|--|--|
| FAM66C   |  |  |  |
| FAM69A   |  |  |  |
| FAM69B   |  |  |  |
| FAM71E1  |  |  |  |
| FAM73A   |  |  |  |
| FAM76A   |  |  |  |
| FAM78B   |  |  |  |
| FAM81A   |  |  |  |
| FAM86A   |  |  |  |
| FAM86B3P |  |  |  |
| FAM98B   |  |  |  |
| FANCC    |  |  |  |
| FANCM    |  |  |  |
| FANK1    |  |  |  |
| FARP1    |  |  |  |
| FARSA    |  |  |  |
| FARSB    |  |  |  |
| FAS      |  |  |  |
| FASN     |  |  |  |
| FAXC     |  |  |  |
| FBLN5    |  |  |  |
| FBLN7    |  |  |  |
| FBXL15   |  |  |  |
| FBXL17   |  |  |  |
| FBXL2    |  |  |  |
| FBXO17   |  |  |  |
| FBXO22   |  |  |  |
| FBXO25   |  |  |  |
| FBXO3    |  |  |  |
| FBXO30   |  |  |  |
| FBXO4    |  |  |  |
| FBXO44   |  |  |  |
| FBXO45   |  |  |  |
| FBXO46   |  |  |  |
| FBXO5    |  |  |  |
| FBXO8    |  |  |  |
| FBXO9    |  |  |  |
| FBXW2    |  |  |  |
| FBXW7    |  |  |  |
| FBXW9    |  |  |  |
| FCGBP    |  |  |  |
| FCGR2A   |  |  |  |
| FCGR3A   |  |  |  |
| FCGRT    |  |  |  |

|         |  |  |  |
|---------|--|--|--|
| FECH    |  |  |  |
| FEM1B   |  |  |  |
| FEM1C   |  |  |  |
| FER     |  |  |  |
| FERMT1  |  |  |  |
| FERMT2  |  |  |  |
| FERMT3  |  |  |  |
| FES     |  |  |  |
| FEZ1    |  |  |  |
| FGD4    |  |  |  |
| FGF11   |  |  |  |
| FGF12   |  |  |  |
| FGF14   |  |  |  |
| FGF2    |  |  |  |
| FGF9    |  |  |  |
| FGFR1   |  |  |  |
| FGFR4   |  |  |  |
| FGFRL1  |  |  |  |
| FGL1    |  |  |  |
| FH      |  |  |  |
| FHL2    |  |  |  |
| FHL3    |  |  |  |
| FHOD1   |  |  |  |
| FIBIN   |  |  |  |
| FIBP    |  |  |  |
| FIGNL1  |  |  |  |
| FIS1    |  |  |  |
| FKBP10  |  |  |  |
| FKBP14  |  |  |  |
| FKBP8   |  |  |  |
| FLNA    |  |  |  |
| FLOT2   |  |  |  |
| FLT3    |  |  |  |
| FLYWCH2 |  |  |  |
| FMN1    |  |  |  |
| FMR1    |  |  |  |
| FNBP1L  |  |  |  |
| FNDC3A  |  |  |  |
| FNDC3B  |  |  |  |
| FNDC4   |  |  |  |
| FNDC5   |  |  |  |
| FNIP2   |  |  |  |
| FOCAD   |  |  |  |
| FOLH1   |  |  |  |

|           |  |  |  |
|-----------|--|--|--|
| FOPNL     |  |  |  |
| FOXE1     |  |  |  |
| FOXJ1     |  |  |  |
| FOXO1     |  |  |  |
| FOXRED1   |  |  |  |
| FPR1      |  |  |  |
| FRAS1     |  |  |  |
| FRG1      |  |  |  |
| FRG1B     |  |  |  |
| FRMPD4    |  |  |  |
| FRS3      |  |  |  |
| FRY       |  |  |  |
| FSCN2     |  |  |  |
| FSD1      |  |  |  |
| FSD2      |  |  |  |
| FSTL3     |  |  |  |
| FSTL4     |  |  |  |
| FTH1      |  |  |  |
| FTL       |  |  |  |
| FTLP3     |  |  |  |
| FTO       |  |  |  |
| FTSJ1     |  |  |  |
| FTSJ2     |  |  |  |
| FTSJD2    |  |  |  |
| FUT10     |  |  |  |
| FXR1      |  |  |  |
| FXR2      |  |  |  |
| FXYD3     |  |  |  |
| FYN       |  |  |  |
| FZD1      |  |  |  |
| FZD7      |  |  |  |
| FZD8      |  |  |  |
| FZD9      |  |  |  |
| G3BP1     |  |  |  |
| G3BP2     |  |  |  |
| GABARAPL1 |  |  |  |
| GABPA     |  |  |  |
| GABPB1    |  |  |  |
| GABPB2    |  |  |  |
| GABRA1    |  |  |  |
| GABRA2    |  |  |  |
| GABRB1    |  |  |  |
| GABRB2    |  |  |  |
| GABRD     |  |  |  |

|          |  |  |  |
|----------|--|--|--|
| GABRE    |  |  |  |
| GABRG1   |  |  |  |
| GABRG2   |  |  |  |
| GABRQ    |  |  |  |
| GAD1     |  |  |  |
| GAD2     |  |  |  |
| GADD45B  |  |  |  |
| GADD45G  |  |  |  |
| GAK      |  |  |  |
| GALM     |  |  |  |
| GALNT10  |  |  |  |
| GALNT11  |  |  |  |
| GALNT12  |  |  |  |
| GALNT13  |  |  |  |
| GALNT3   |  |  |  |
| GALNT6   |  |  |  |
| GAP43    |  |  |  |
| GAPDHP32 |  |  |  |
| GAPDHP58 |  |  |  |
| GARNL3   |  |  |  |
| GARS     |  |  |  |
| GAS7     |  |  |  |
| GATAD1   |  |  |  |
| GATAD2A  |  |  |  |
| GATM     |  |  |  |
| GBA      |  |  |  |
| GBA2     |  |  |  |
| GBP1     |  |  |  |
| GBP2     |  |  |  |
| GBP3     |  |  |  |
| GBP4     |  |  |  |
| GCA      |  |  |  |
| GCFC2    |  |  |  |
| GCH1     |  |  |  |
| GDAP1    |  |  |  |
| GDE1     |  |  |  |
| GDF6     |  |  |  |
| GDI1     |  |  |  |
| GDPD1    |  |  |  |
| GEM      |  |  |  |
| GFPT2    |  |  |  |
| GFRA2    |  |  |  |
| GGCX     |  |  |  |
| GGH      |  |  |  |

|          |  |  |  |
|----------|--|--|--|
| GGT7     |  |  |  |
| GHDC     |  |  |  |
| GHITM    |  |  |  |
| GHR      |  |  |  |
| GIPC2    |  |  |  |
| GIT2     |  |  |  |
| GJA1     |  |  |  |
| GJB1     |  |  |  |
| GJB2     |  |  |  |
| GJC2     |  |  |  |
| GK5      |  |  |  |
| GLCCI1   |  |  |  |
| GLCE     |  |  |  |
| GLG1     |  |  |  |
| GLI3     |  |  |  |
| GLIS3    |  |  |  |
| GLMN     |  |  |  |
| GLRB     |  |  |  |
| GLRX2    |  |  |  |
| GLS2     |  |  |  |
| GLT1D1   |  |  |  |
| GLTSCR1L |  |  |  |
| GLUD1    |  |  |  |
| GLYR1    |  |  |  |
| GMCL1    |  |  |  |
| GMIP     |  |  |  |
| GMNN     |  |  |  |
| GMPR2    |  |  |  |
| GMPS     |  |  |  |
| GNA12    |  |  |  |
| GNA13    |  |  |  |
| GNA14    |  |  |  |
| GNAI1    |  |  |  |
| GNAI3    |  |  |  |
| GNAS     |  |  |  |
| GNB1     |  |  |  |
| GNB2L1   |  |  |  |
| GNB5     |  |  |  |
| GNG12    |  |  |  |
| GNG5     |  |  |  |
| GNL1     |  |  |  |
| GNS      |  |  |  |
| GOLGA2   |  |  |  |
| GOLGA8A  |  |  |  |



|         |  |  |  |
|---------|--|--|--|
| GOLIM4  |  |  |  |
| GOLM1   |  |  |  |
| GOPC    |  |  |  |
| GOT1    |  |  |  |
| GOT2    |  |  |  |
| GOT2P2  |  |  |  |
| GPAA1   |  |  |  |
| GPAM    |  |  |  |
| GPATCH1 |  |  |  |
| GPBP1   |  |  |  |
| GPC4    |  |  |  |
| GPC5    |  |  |  |
| GPCPD1  |  |  |  |
| GPD1    |  |  |  |
| GPD1L   |  |  |  |
| GPD2    |  |  |  |
| GPI     |  |  |  |
| GPIHBP1 |  |  |  |
| GPKOW   |  |  |  |
| GPLD1   |  |  |  |
| GPR12   |  |  |  |
| GPR125  |  |  |  |
| GPR137B |  |  |  |
| GPR137C |  |  |  |
| GPR143  |  |  |  |
| GPR149  |  |  |  |
| GPR153  |  |  |  |
| GPR156  |  |  |  |
| GPR158  |  |  |  |
| GPR160  |  |  |  |
| GPR35   |  |  |  |
| GPR37   |  |  |  |
| GPR56   |  |  |  |
| GPR6    |  |  |  |
| GPR61   |  |  |  |
| GPR62   |  |  |  |
| GPR85   |  |  |  |
| GPR98   |  |  |  |
| GPRASP2 |  |  |  |
| GPRIN3  |  |  |  |
| GPSM1   |  |  |  |
| GPSM3   |  |  |  |
| GPT2    |  |  |  |
| GPX1    |  |  |  |

|          |  |  |  |
|----------|--|--|--|
| GRAMD1B  |  |  |  |
| GRAMD2   |  |  |  |
| GREM2    |  |  |  |
| GRIA2    |  |  |  |
| GRIA3    |  |  |  |
| GRID1    |  |  |  |
| GRIK1    |  |  |  |
| GRIK3    |  |  |  |
| GRIN2A   |  |  |  |
| GRIP1    |  |  |  |
| GRPEL2   |  |  |  |
| GRTP1    |  |  |  |
| GSDMD    |  |  |  |
| GSK3B    |  |  |  |
| GSKIP    |  |  |  |
| GSPT1    |  |  |  |
| GSS      |  |  |  |
| GSTA4    |  |  |  |
| GSTM4    |  |  |  |
| GSTO2    |  |  |  |
| GSTZ1    |  |  |  |
| GTDC2    |  |  |  |
| GTF2F2   |  |  |  |
| GTF2IRD1 |  |  |  |
| GTF3C2   |  |  |  |
| GTF3C6   |  |  |  |
| GTPBP10  |  |  |  |
| GUCY1A2  |  |  |  |
| GUCY1B3  |  |  |  |
| GUSBP1   |  |  |  |
| GUSBP11  |  |  |  |
| GXYLT1   |  |  |  |
| GYPC     |  |  |  |
| GYPE     |  |  |  |
| GYS1     |  |  |  |
| H2AFJ    |  |  |  |
| H3F3A    |  |  |  |
| HABP4    |  |  |  |
| HACE1    |  |  |  |
| HACL1    |  |  |  |
| HADHB    |  |  |  |
| HAGH     |  |  |  |
| HAGHL    |  |  |  |
| HAPLN1   |  |  |  |

|          |  |  |  |
|----------|--|--|--|
| HAR1A    |  |  |  |
| HARBI1   |  |  |  |
| HARS     |  |  |  |
| HAS2     |  |  |  |
| HAUS8    |  |  |  |
| HAVCR2   |  |  |  |
| HBB      |  |  |  |
| HBQ1     |  |  |  |
| HBS1L    |  |  |  |
| HCK      |  |  |  |
| HCLS1    |  |  |  |
| HCN1     |  |  |  |
| HCN4     |  |  |  |
| HCRTR2   |  |  |  |
| HDAC1    |  |  |  |
| HEATR5B  |  |  |  |
| HEBP2    |  |  |  |
| HECTD1   |  |  |  |
| HECTD3   |  |  |  |
| HECW1    |  |  |  |
| HECW2    |  |  |  |
| HELB     |  |  |  |
| HELLS    |  |  |  |
| HENMT1   |  |  |  |
| HERC1    |  |  |  |
| HERC2    |  |  |  |
| HERC2P9  |  |  |  |
| HERC3    |  |  |  |
| HERC5    |  |  |  |
| HEXA-AS1 |  |  |  |
| HEYL     |  |  |  |
| HGF      |  |  |  |
| HGSNAT   |  |  |  |
| HHAT     |  |  |  |
| HHIP     |  |  |  |
| HHIPL1   |  |  |  |
| HHLA3    |  |  |  |
| HIAT1    |  |  |  |
| HIBCH    |  |  |  |
| HIC1     |  |  |  |
| HID1     |  |  |  |
| HIF1A    |  |  |  |
| HINT1    |  |  |  |
| HIPK1    |  |  |  |

|           |  |  |  |
|-----------|--|--|--|
| HIPK3     |  |  |  |
| HIST1H1C  |  |  |  |
| HIST1H2AB |  |  |  |
| HIST1H2AC |  |  |  |
| HIST1H2AG |  |  |  |
| HIST1H2AH |  |  |  |
| HIST1H2AI |  |  |  |
| HIST1H2BB |  |  |  |
| HIST1H2BI |  |  |  |
| HIST1H2BJ |  |  |  |
| HIST1H2BM |  |  |  |
| HIST1H3B  |  |  |  |
| HIST1H3C  |  |  |  |
| HIST1H4B  |  |  |  |
| HIST1H4E  |  |  |  |
| HIST2H2AC |  |  |  |
| HIST2H2BA |  |  |  |
| HIST2H2BB |  |  |  |
| HIST2H2BE |  |  |  |
| HIST2H2BF |  |  |  |
| HIVEP2    |  |  |  |
| HKR1      |  |  |  |
| HLA-DRB1  |  |  |  |
| HLA-DRB5  |  |  |  |
| HLCS      |  |  |  |
| HLTF      |  |  |  |
| HLX       |  |  |  |
| HMBOX1    |  |  |  |
| HMCN1     |  |  |  |
| HMG20A    |  |  |  |
| HMG20B    |  |  |  |
| HMGB2     |  |  |  |
| HMGN1     |  |  |  |
| HMHA1     |  |  |  |
| HMOX1     |  |  |  |
| HMOX2     |  |  |  |
| HNRNPD    |  |  |  |
| HNRNPH2   |  |  |  |
| HNRNPU    |  |  |  |
| HP1BP3    |  |  |  |
| HPRT1     |  |  |  |
| HPS6      |  |  |  |
| HR        |  |  |  |
| HRSP12    |  |  |  |

|          |  |  |  |
|----------|--|--|--|
| HS2ST1   |  |  |  |
| HS3ST3B1 |  |  |  |
| HS3ST4   |  |  |  |
| HSD11B1  |  |  |  |
| HSD3B1   |  |  |  |
| HSD3B7   |  |  |  |
| HSDL2    |  |  |  |
| HSF1     |  |  |  |
| HSP90B1  |  |  |  |
| HSPA12A  |  |  |  |
| HSPA12B  |  |  |  |
| HSPA1A   |  |  |  |
| HSPA1B   |  |  |  |
| HSPA5    |  |  |  |
| HSPA6    |  |  |  |
| HSPB1    |  |  |  |
| HSPB8    |  |  |  |
| HSPBP1   |  |  |  |
| HSPD1    |  |  |  |
| HSPD1P5  |  |  |  |
| HTR1F    |  |  |  |
| HTR3B    |  |  |  |
| HYLS1    |  |  |  |
| IAH1     |  |  |  |
| IARS2    |  |  |  |
| ICA1     |  |  |  |
| ICAM1    |  |  |  |
| ICAM3    |  |  |  |
| ID4      |  |  |  |
| IDH1     |  |  |  |
| IDH3A    |  |  |  |
| IDH3B    |  |  |  |
| IDH3G    |  |  |  |
| IFI16    |  |  |  |
| IFIH1    |  |  |  |
| IFITM2   |  |  |  |
| IFNAR1   |  |  |  |
| IFNW1    |  |  |  |
| IFRD1    |  |  |  |
| IFT172   |  |  |  |
| IFT27    |  |  |  |
| IFT52    |  |  |  |
| IFT74    |  |  |  |
| IGDCC4   |  |  |  |

|          |  |  |  |
|----------|--|--|--|
| IGF1R    |  |  |  |
| IGF2BP2  |  |  |  |
| IGFBP2   |  |  |  |
| IGFBP5   |  |  |  |
| IGFBP6   |  |  |  |
| IGLON5   |  |  |  |
| IGSF21   |  |  |  |
| IGSF8    |  |  |  |
| IKBKE    |  |  |  |
| IL10RA   |  |  |  |
| IL17RA   |  |  |  |
| IL17RB   |  |  |  |
| IL17RC   |  |  |  |
| IL17RD   |  |  |  |
| IL18BP   |  |  |  |
| IL1R1    |  |  |  |
| IL1RAPL1 |  |  |  |
| IL33     |  |  |  |
| IL4R     |  |  |  |
| IL6R     |  |  |  |
| IL6ST    |  |  |  |
| IMMT     |  |  |  |
| IMP3     |  |  |  |
| IMPA2    |  |  |  |
| IMPAD1   |  |  |  |
| INA      |  |  |  |
| INF2     |  |  |  |
| ING1     |  |  |  |
| INIP     |  |  |  |
| INO80D   |  |  |  |
| INPP4A   |  |  |  |
| INPP5F   |  |  |  |
| INPP5J   |  |  |  |
| INPP5K   |  |  |  |
| INPPL1   |  |  |  |
| INTS10   |  |  |  |
| INTS12   |  |  |  |
| INTS4    |  |  |  |
| INTS4L1  |  |  |  |
| INTS4L2  |  |  |  |
| INTS5    |  |  |  |
| INTU     |  |  |  |
| IPCEF1   |  |  |  |
| IPMK     |  |  |  |

|         |  |  |  |
|---------|--|--|--|
| IPO13   |  |  |  |
| IQCB1   |  |  |  |
| IQGAP2  |  |  |  |
| IQSEC1  |  |  |  |
| IQSEC3  |  |  |  |
| IREB2   |  |  |  |
| IRF1    |  |  |  |
| IRF2BP1 |  |  |  |
| IRF2BPL |  |  |  |
| IRF5    |  |  |  |
| IRF7    |  |  |  |
| IRGQ    |  |  |  |
| ISCA1   |  |  |  |
| ISCU    |  |  |  |
| ITFG1   |  |  |  |
| ITFG2   |  |  |  |
| ITGA7   |  |  |  |
| ITGAL   |  |  |  |
| ITGAV   |  |  |  |
| ITGB2   |  |  |  |
| ITGB5   |  |  |  |
| ITGB7   |  |  |  |
| ITGB8   |  |  |  |
| ITIH3   |  |  |  |
| ITIH5   |  |  |  |
| ITM2A   |  |  |  |
| ITM2C   |  |  |  |
| ITPA    |  |  |  |
| ITPK1   |  |  |  |
| ITPKC   |  |  |  |
| ITPR1   |  |  |  |
| ITPR2   |  |  |  |
| ITPRIP  |  |  |  |
| JAK3    |  |  |  |
| JAKMIP1 |  |  |  |
| KAL1    |  |  |  |
| KALP    |  |  |  |
| KALRN   |  |  |  |
| KANK1   |  |  |  |
| KANSL1L |  |  |  |
| KANSL3  |  |  |  |
| KARS    |  |  |  |
| KAT7    |  |  |  |
| KATNAL1 |  |  |  |

|          |  |  |  |
|----------|--|--|--|
| KATNB1   |  |  |  |
| KAZN     |  |  |  |
| KBTBD11  |  |  |  |
| KBTBD3   |  |  |  |
| KCNA1    |  |  |  |
| KCNA2    |  |  |  |
| KCNAB1   |  |  |  |
| KCNAB3   |  |  |  |
| KCNB1    |  |  |  |
| KCNB2    |  |  |  |
| KCNC2    |  |  |  |
| KCNE4    |  |  |  |
| KCNF1    |  |  |  |
| KCNG2    |  |  |  |
| KCNH1    |  |  |  |
| KCNH5    |  |  |  |
| KCNH8    |  |  |  |
| KCNIP4   |  |  |  |
| KCNJ11   |  |  |  |
| KCNJ16   |  |  |  |
| KCNJ3    |  |  |  |
| KCNJ4    |  |  |  |
| KCNJ9    |  |  |  |
| KCNK1    |  |  |  |
| KCNN3    |  |  |  |
| KCNN4    |  |  |  |
| KCNQ1    |  |  |  |
| KCNQ5    |  |  |  |
| KCNS1    |  |  |  |
| KCNS3    |  |  |  |
| KCNV1    |  |  |  |
| KCTD1    |  |  |  |
| KCTD12   |  |  |  |
| KCTD6    |  |  |  |
| KCTD9    |  |  |  |
| KDELC2   |  |  |  |
| KDELR3   |  |  |  |
| KDM1B    |  |  |  |
| KDM2B    |  |  |  |
| KDM3A    |  |  |  |
| KDM5A    |  |  |  |
| KDM5D    |  |  |  |
| KDM6B    |  |  |  |
| KIAA0040 |  |  |  |



|           |  |  |  |
|-----------|--|--|--|
| KIAA0196  |  |  |  |
| KIAA0226L |  |  |  |
| KIAA0232  |  |  |  |
| KIAA0319L |  |  |  |
| KIAA0368  |  |  |  |
| KIAA0430  |  |  |  |
| KIAA0513  |  |  |  |
| KIAA1045  |  |  |  |
| KIAA1107  |  |  |  |
| KIAA1109  |  |  |  |
| KIAA1143  |  |  |  |
| KIAA1217  |  |  |  |
| KIAA1279  |  |  |  |
| KIAA1324L |  |  |  |
| KIAA1432  |  |  |  |
| KIAA1456  |  |  |  |
| KIAA1467  |  |  |  |
| KIAA1549L |  |  |  |
| KIAA1551  |  |  |  |
| KIAA1755  |  |  |  |
| KIAA1841  |  |  |  |
| KIDINS220 |  |  |  |
| KIF1B     |  |  |  |
| KIF21A    |  |  |  |
| KIF22     |  |  |  |
| KIF23     |  |  |  |
| KIF3A     |  |  |  |
| KIF4B     |  |  |  |
| KIF7      |  |  |  |
| KIFAP3    |  |  |  |
| KLB       |  |  |  |
| KLC1      |  |  |  |
| KLC2      |  |  |  |
| KLC4      |  |  |  |
| KLF13     |  |  |  |
| KLF5      |  |  |  |
| KLF6      |  |  |  |
| KLF9      |  |  |  |
| KLHDC1    |  |  |  |
| KLHDC2    |  |  |  |
| KLHDC3    |  |  |  |
| KLHDC9    |  |  |  |
| KLHL11    |  |  |  |
| KLHL15    |  |  |  |

|         |  |  |  |
|---------|--|--|--|
| KLHL21  |  |  |  |
| KLHL22  |  |  |  |
| KLHL3   |  |  |  |
| KLHL42  |  |  |  |
| KLHL6   |  |  |  |
| KLRAP1  |  |  |  |
| KMT2C   |  |  |  |
| KPNA6   |  |  |  |
| KRT5    |  |  |  |
| KRT8P12 |  |  |  |
| KRT8P26 |  |  |  |
| KTN1    |  |  |  |
| L2HGDH  |  |  |  |
| L3MBTL2 |  |  |  |
| L3MBTL3 |  |  |  |
| LACTB   |  |  |  |
| LAIR1   |  |  |  |
| LAMA5   |  |  |  |
| LAMB1   |  |  |  |
| LAMC1   |  |  |  |
| LAMTOR4 |  |  |  |
| LANCL1  |  |  |  |
| LAP3    |  |  |  |
| LAPTM5  |  |  |  |
| LARP4   |  |  |  |
| LARP6   |  |  |  |
| LAT2    |  |  |  |
| LATS2   |  |  |  |
| LCA5    |  |  |  |
| LCMT1   |  |  |  |
| LCP1    |  |  |  |
| LCP2    |  |  |  |
| LDB1    |  |  |  |
| LDB2    |  |  |  |
| LDB3    |  |  |  |
| LDLRAD4 |  |  |  |
| LECT1   |  |  |  |
| LEPREL1 |  |  |  |
| LETM2   |  |  |  |
| LETMD1  |  |  |  |
| LGALS9  |  |  |  |
| LGI2    |  |  |  |
| LGI3    |  |  |  |
| LGR4    |  |  |  |

|           |  |  |  |
|-----------|--|--|--|
| LHFPL1    |  |  |  |
| LHFPL2    |  |  |  |
| LHX2      |  |  |  |
| LHX6      |  |  |  |
| LIG4      |  |  |  |
| LILRB1    |  |  |  |
| LIMD1     |  |  |  |
| LIMK1     |  |  |  |
| LIMK2     |  |  |  |
| LIMS1     |  |  |  |
| LIN52     |  |  |  |
| LIN54     |  |  |  |
| LIN7C     |  |  |  |
| LINC00032 |  |  |  |
| LINC00342 |  |  |  |
| LINC00404 |  |  |  |
| LINC00470 |  |  |  |
| LINC00473 |  |  |  |
| LINC00507 |  |  |  |
| LINC00511 |  |  |  |
| LINC00599 |  |  |  |
| LINC00639 |  |  |  |
| LINC00667 |  |  |  |
| LINC00672 |  |  |  |
| LINC00683 |  |  |  |
| LINC00689 |  |  |  |
| LINC00693 |  |  |  |
| LINC00882 |  |  |  |
| LINC00886 |  |  |  |
| LINC00898 |  |  |  |
| LINC00963 |  |  |  |
| LINC00966 |  |  |  |
| LMAN2L    |  |  |  |
| LMBRD1    |  |  |  |
| LMNB2     |  |  |  |
| LMO4      |  |  |  |
| LNP1      |  |  |  |
| LOH12CR1  |  |  |  |
| LONRF3    |  |  |  |
| LOXL2     |  |  |  |
| LOXL3     |  |  |  |
| LPAR2     |  |  |  |
| LPCAT4    |  |  |  |
| LPGAT1    |  |  |  |

|           |  |  |  |
|-----------|--|--|--|
| LPIN1     |  |  |  |
| LPP       |  |  |  |
| LPP-AS2   |  |  |  |
| LRAT      |  |  |  |
| LRCH2     |  |  |  |
| LRIG1     |  |  |  |
| LRP10     |  |  |  |
| LRP11     |  |  |  |
| LRRC10B   |  |  |  |
| LRRC16A   |  |  |  |
| LRRC20    |  |  |  |
| LRRC3     |  |  |  |
| LRRC37A6P |  |  |  |
| LRRC37B   |  |  |  |
| LRRC39    |  |  |  |
| LRRC40    |  |  |  |
| LRRC47    |  |  |  |
| LRRC58    |  |  |  |
| LRRC8A    |  |  |  |
| LRRC8B    |  |  |  |
| LRRIQ1    |  |  |  |
| LRRK2     |  |  |  |
| LSM11     |  |  |  |
| LSM14B    |  |  |  |
| LSM6      |  |  |  |
| LSP1      |  |  |  |
| LSR       |  |  |  |
| LSS       |  |  |  |
| LTBP1     |  |  |  |
| LTBP2     |  |  |  |
| LTBP4     |  |  |  |
| LTBR      |  |  |  |
| LTN1      |  |  |  |
| LY6E      |  |  |  |
| LYN       |  |  |  |
| LYNX1     |  |  |  |
| LYPD1     |  |  |  |
| LYPLAL1   |  |  |  |
| LYRM4     |  |  |  |
| LYSMD2    |  |  |  |
| LYSMD3    |  |  |  |
| LYZ       |  |  |  |
| LZTR1     |  |  |  |
| MACF1     |  |  |  |

|           |  |  |  |
|-----------|--|--|--|
| MAD2L1    |  |  |  |
| MAD2L1BP  |  |  |  |
| MAD2L2    |  |  |  |
| MADD      |  |  |  |
| MAFF      |  |  |  |
| MAG       |  |  |  |
| MAGEE1    |  |  |  |
| MAGEF1    |  |  |  |
| MAGOH     |  |  |  |
| MAL2      |  |  |  |
| MALL      |  |  |  |
| MAMDC4    |  |  |  |
| MAML2     |  |  |  |
| MAMLD1    |  |  |  |
| MAN1B1    |  |  |  |
| MAN2A2    |  |  |  |
| MANBAL    |  |  |  |
| MANSC1    |  |  |  |
| MAOA      |  |  |  |
| MAOB      |  |  |  |
| MAP10     |  |  |  |
| MAP1B     |  |  |  |
| MAP1LC3B2 |  |  |  |
| MAP2K3    |  |  |  |
| MAP2K4    |  |  |  |
| MAP2K5    |  |  |  |
| MAP2K7    |  |  |  |
| MAP3K12   |  |  |  |
| MAP3K19   |  |  |  |
| MAP3K2    |  |  |  |
| MAP3K5    |  |  |  |
| MAP3K8    |  |  |  |
| MAP3K9    |  |  |  |
| MAP4K2    |  |  |  |
| MAP4K3    |  |  |  |
| MAP6D1    |  |  |  |
| MAP7D2    |  |  |  |
| MAP7D3    |  |  |  |
| MAPK10    |  |  |  |
| MAPK8     |  |  |  |
| MAPK8IP2  |  |  |  |
| MAPK9     |  |  |  |
| MAPKAPK2  |  |  |  |
| MAPKAPK3  |  |  |  |

|        |  |  |  |
|--------|--|--|--|
| MAPRE1 |  |  |  |
| MARCH3 |  |  |  |
| MARCH6 |  |  |  |
| MARK3  |  |  |  |
| MAS1   |  |  |  |
| MAT2B  |  |  |  |
| MATN2  |  |  |  |
| MBP    |  |  |  |
| MBTPS2 |  |  |  |
| MC1R   |  |  |  |
| MCAM   |  |  |  |
| MCC    |  |  |  |
| MCF2   |  |  |  |
| MCHR1  |  |  |  |
| MCHR2  |  |  |  |
| MCL1   |  |  |  |
| MCM4   |  |  |  |
| MCMBP  |  |  |  |
| MCMD2C |  |  |  |
| MCOLN1 |  |  |  |
| MCTP1  |  |  |  |
| MCTS1  |  |  |  |
| MDFIC  |  |  |  |
| MDGA2  |  |  |  |
| MDH1B  |  |  |  |
| MDH2   |  |  |  |
| MDK    |  |  |  |
| ME1    |  |  |  |
| ME2    |  |  |  |
| ME3    |  |  |  |
| MEAF6  |  |  |  |
| MECR   |  |  |  |
| MED13  |  |  |  |
| MED21  |  |  |  |
| MED23  |  |  |  |
| MED31  |  |  |  |
| MEF2C  |  |  |  |
| MEFV   |  |  |  |
| MEN1   |  |  |  |
| MEOX2  |  |  |  |
| MERTK  |  |  |  |
| MESDC2 |  |  |  |
| METAP1 |  |  |  |
| METRN  |  |  |  |

|            |  |  |  |
|------------|--|--|--|
| METRNL     |  |  |  |
| METTLL13   |  |  |  |
| METTLL15P1 |  |  |  |
| METTLL21D  |  |  |  |
| METTLL22   |  |  |  |
| METTLL7B   |  |  |  |
| MEX3A      |  |  |  |
| MEX3D      |  |  |  |
| MFAP1      |  |  |  |
| MFN1       |  |  |  |
| MFN2       |  |  |  |
| MFSD10     |  |  |  |
| MFSD3      |  |  |  |
| MFSD6      |  |  |  |
| MGARP      |  |  |  |
| MGST1      |  |  |  |
| MICAL2     |  |  |  |
| MICU1      |  |  |  |
| MICU3      |  |  |  |
| MID1       |  |  |  |
| MID2       |  |  |  |
| MIER3      |  |  |  |
| MIP        |  |  |  |
| MIPEP      |  |  |  |
| MIR181A1HG |  |  |  |
| MIR210HG   |  |  |  |
| MIR24-2    |  |  |  |
| MKI67      |  |  |  |
| MKNK1      |  |  |  |
| MKNK2      |  |  |  |
| MKRN1      |  |  |  |
| MKX        |  |  |  |
| MLC1       |  |  |  |
| MLF1       |  |  |  |
| MLF1IP     |  |  |  |
| MLF2       |  |  |  |
| MLKL       |  |  |  |
| MLXIP      |  |  |  |
| MMAB       |  |  |  |
| MMP11      |  |  |  |
| MMP14      |  |  |  |
| MOAP1      |  |  |  |
| MOB1A      |  |  |  |
| MOB1B      |  |  |  |

|          |  |  |  |
|----------|--|--|--|
| MOB3A    |  |  |  |
| MOB3B    |  |  |  |
| MOBP     |  |  |  |
| MOG      |  |  |  |
| MON2     |  |  |  |
| MORC3    |  |  |  |
| MOV10    |  |  |  |
| MPC2     |  |  |  |
| MPP1     |  |  |  |
| MPP2     |  |  |  |
| MPPED1   |  |  |  |
| MPV17    |  |  |  |
| MPZL1    |  |  |  |
| MR1      |  |  |  |
| MRAS     |  |  |  |
| MRFAP1L1 |  |  |  |
| MRI1     |  |  |  |
| MROH8    |  |  |  |
| MRPL19   |  |  |  |
| MRPL37   |  |  |  |
| MRPL42   |  |  |  |
| MRPL45   |  |  |  |
| MRPL55   |  |  |  |
| MRPS18B  |  |  |  |
| MRPS21   |  |  |  |
| MRPS23   |  |  |  |
| MRPS26   |  |  |  |
| MRPS35   |  |  |  |
| MRPS36   |  |  |  |
| MRPS9    |  |  |  |
| MSANTD4  |  |  |  |
| MSI1     |  |  |  |
| MSI2     |  |  |  |
| MSN      |  |  |  |
| MSR1     |  |  |  |
| MSRB1    |  |  |  |
| MSRB3    |  |  |  |
| MSX1     |  |  |  |
| MT1G     |  |  |  |
| MT2A     |  |  |  |
| MTCH2    |  |  |  |
| MTDH     |  |  |  |
| MTF2     |  |  |  |
| MTHFD2   |  |  |  |



|           |  |  |  |
|-----------|--|--|--|
| MTHFD2L   |  |  |  |
| MTM1      |  |  |  |
| MTMR11    |  |  |  |
| MTMR2     |  |  |  |
| MTMR3     |  |  |  |
| MTMR4     |  |  |  |
| MTMR7     |  |  |  |
| MTPAP     |  |  |  |
| MTR       |  |  |  |
| MTX2      |  |  |  |
| MTX3      |  |  |  |
| MUC1      |  |  |  |
| MUL1      |  |  |  |
| MUM1      |  |  |  |
| MVK       |  |  |  |
| MXD1      |  |  |  |
| MYBBP1A   |  |  |  |
| MYC       |  |  |  |
| MYCBP2    |  |  |  |
| MYD88     |  |  |  |
| MYH7      |  |  |  |
| MYH9      |  |  |  |
| MYO18A    |  |  |  |
| MYO1F     |  |  |  |
| MYO5A     |  |  |  |
| MYO7A     |  |  |  |
| MYOF      |  |  |  |
| MYRF      |  |  |  |
| MYRIP     |  |  |  |
| MYT1L     |  |  |  |
| N4BP2     |  |  |  |
| N4BP3     |  |  |  |
| NAA25     |  |  |  |
| NAA40     |  |  |  |
| NAA50     |  |  |  |
| NABP1     |  |  |  |
| NABP2     |  |  |  |
| NACC2     |  |  |  |
| NADK      |  |  |  |
| NADK2     |  |  |  |
| NAE1      |  |  |  |
| NALCN     |  |  |  |
| NALCN-AS1 |  |  |  |
| NAMPT     |  |  |  |

|           |  |  |  |
|-----------|--|--|--|
| NAMPTL    |  |  |  |
| NANOS1    |  |  |  |
| NAP1L2    |  |  |  |
| NAP1L3    |  |  |  |
| NAPA      |  |  |  |
| NAPB      |  |  |  |
| NAPEPLD   |  |  |  |
| NAPG      |  |  |  |
| NARS      |  |  |  |
| NAT8L     |  |  |  |
| NBEA      |  |  |  |
| NBEAL1    |  |  |  |
| NBEAL2    |  |  |  |
| NBPF10    |  |  |  |
| NBPF13P   |  |  |  |
| NBPF14    |  |  |  |
| NBPF20    |  |  |  |
| NCALD     |  |  |  |
| NCAN      |  |  |  |
| NCBP1     |  |  |  |
| NCBP2     |  |  |  |
| NCBP2-AS2 |  |  |  |
| NCKAP1L   |  |  |  |
| NCOA7     |  |  |  |
| NCR3LG1   |  |  |  |
| NDEL1     |  |  |  |
| NDFIP1    |  |  |  |
| NDFIP2    |  |  |  |
| NDN       |  |  |  |
| NDRG3     |  |  |  |
| NDRG4     |  |  |  |
| NDUFA10   |  |  |  |
| NDUFA4    |  |  |  |
| NDUFA9    |  |  |  |
| NDUFAF4   |  |  |  |
| NDUFAF5   |  |  |  |
| NDUFAF6   |  |  |  |
| NDUFB2    |  |  |  |
| NDUFB9    |  |  |  |
| NDUFS1    |  |  |  |
| NDUFS2    |  |  |  |
| NDUFS3    |  |  |  |
| NDUFS4    |  |  |  |
| NEBL      |  |  |  |

|          |  |  |  |
|----------|--|--|--|
| NECAB1   |  |  |  |
| NECAP1   |  |  |  |
| NECAP2   |  |  |  |
| NEFH     |  |  |  |
| NEFL     |  |  |  |
| NEGR1    |  |  |  |
| NEK3     |  |  |  |
| NEK6     |  |  |  |
| NELL1    |  |  |  |
| NELL2    |  |  |  |
| NES      |  |  |  |
| NET1     |  |  |  |
| NEU3     |  |  |  |
| NEUROD6  |  |  |  |
| NEXN     |  |  |  |
| NF1      |  |  |  |
| NFAM1    |  |  |  |
| NFASC    |  |  |  |
| NFATC1   |  |  |  |
| NFATC2   |  |  |  |
| NFATC2IP |  |  |  |
| NFE2L2   |  |  |  |
| NFE2L3   |  |  |  |
| NFIB     |  |  |  |
| NFIL3    |  |  |  |
| NFKB2    |  |  |  |
| NFKBID   |  |  |  |
| NFKBIL1  |  |  |  |
| NFKBIZ   |  |  |  |
| NFS1     |  |  |  |
| NFU1     |  |  |  |
| NFYA     |  |  |  |
| NFYB     |  |  |  |
| NGEF     |  |  |  |
| NGFRAP1  |  |  |  |
| NHLH1    |  |  |  |
| NHLH2    |  |  |  |
| NHLRC3   |  |  |  |
| NHP2L1   |  |  |  |
| NHS      |  |  |  |
| NHSL1    |  |  |  |
| NHSL2    |  |  |  |
| NICN1    |  |  |  |
| NID1     |  |  |  |

|           |  |  |  |
|-----------|--|--|--|
| NIF3L1    |  |  |  |
| NINJ1     |  |  |  |
| NIPA1     |  |  |  |
| NIPA2     |  |  |  |
| NIPAL1    |  |  |  |
| NIPAL2    |  |  |  |
| NIPAL3    |  |  |  |
| NIPSNAP1  |  |  |  |
| NIT1      |  |  |  |
| NIT2      |  |  |  |
| NKIRAS1   |  |  |  |
| NLGN4Y    |  |  |  |
| NLK       |  |  |  |
| NLN       |  |  |  |
| NLRC5     |  |  |  |
| NLRP9P    |  |  |  |
| NMB       |  |  |  |
| NME5      |  |  |  |
| NMI       |  |  |  |
| NMNAT2    |  |  |  |
| NMRAL1    |  |  |  |
| NNT       |  |  |  |
| NOL10     |  |  |  |
| NOMO1     |  |  |  |
| NONOP2    |  |  |  |
| NOP58     |  |  |  |
| NOP9      |  |  |  |
| NOS1      |  |  |  |
| NOS2      |  |  |  |
| NOTCH2    |  |  |  |
| NOVA1     |  |  |  |
| NPAS3     |  |  |  |
| NPHP1     |  |  |  |
| NPHP3-AS1 |  |  |  |
| NPL       |  |  |  |
| NPM2      |  |  |  |
| NPRL2     |  |  |  |
| NPTN      |  |  |  |
| NPY5R     |  |  |  |
| NQO1      |  |  |  |
| NR2E1     |  |  |  |
| NR3C1     |  |  |  |
| NRAP      |  |  |  |
| NRBP2     |  |  |  |

|         |  |  |  |
|---------|--|--|--|
| NRD1    |  |  |  |
| NREP    |  |  |  |
| NRG1    |  |  |  |
| NRIP3   |  |  |  |
| NRM     |  |  |  |
| NRSN2   |  |  |  |
| NRXN3   |  |  |  |
| NSF     |  |  |  |
| NSMCE2  |  |  |  |
| NSUN5   |  |  |  |
| NSUN5P1 |  |  |  |
| NT5C2   |  |  |  |
| NT5DC1  |  |  |  |
| NT5E    |  |  |  |
| NT5M    |  |  |  |
| NTHL1   |  |  |  |
| NTN1    |  |  |  |
| NTN3    |  |  |  |
| NTN4    |  |  |  |
| NTPCR   |  |  |  |
| NTSR2   |  |  |  |
| NUAK1   |  |  |  |
| NUCKS1  |  |  |  |
| NUDCD3  |  |  |  |
| NUDT17  |  |  |  |
| NUDT18  |  |  |  |
| NUDT2   |  |  |  |
| NUDT21  |  |  |  |
| NUFIP2  |  |  |  |
| NUP133  |  |  |  |
| NUP155  |  |  |  |
| NUP210  |  |  |  |
| NUP210L |  |  |  |
| NUP93   |  |  |  |
| NUP98   |  |  |  |
| NUPR1   |  |  |  |
| NUSAP1  |  |  |  |
| NXN     |  |  |  |
| NXPH1   |  |  |  |
| NXPH2   |  |  |  |
| NXPH3   |  |  |  |
| NXT2    |  |  |  |
| OAF     |  |  |  |
| OAT     |  |  |  |

|           |  |  |  |
|-----------|--|--|--|
| OBFC1     |  |  |  |
| OCIAD1    |  |  |  |
| ODC1      |  |  |  |
| OGDH      |  |  |  |
| OGDHL     |  |  |  |
| OGG1      |  |  |  |
| OIP5-AS1  |  |  |  |
| OLA1      |  |  |  |
| OLFM2     |  |  |  |
| OLFM3     |  |  |  |
| OPA1      |  |  |  |
| OPALIN    |  |  |  |
| OPCML     |  |  |  |
| OPHN1     |  |  |  |
| OPN3      |  |  |  |
| OPTN      |  |  |  |
| OR9A2     |  |  |  |
| ORC2      |  |  |  |
| ORC3      |  |  |  |
| OSBPL10   |  |  |  |
| OSBPL11   |  |  |  |
| OSBPL1A   |  |  |  |
| OSCAR     |  |  |  |
| OSGEPL1   |  |  |  |
| OSGIN1    |  |  |  |
| OSMR      |  |  |  |
| OSTF1     |  |  |  |
| OTUB1     |  |  |  |
| OTUD4     |  |  |  |
| OTUD7A    |  |  |  |
| OTX1      |  |  |  |
| OVGP1     |  |  |  |
| OXA1L     |  |  |  |
| OXLD1     |  |  |  |
| OXR1      |  |  |  |
| P4HA1     |  |  |  |
| P4HA2     |  |  |  |
| PAAF1     |  |  |  |
| PABPC1    |  |  |  |
| PABPC1L2A |  |  |  |
| PABPC4    |  |  |  |
| PABPN1    |  |  |  |
| PACRG     |  |  |  |
| PACSN2    |  |  |  |

|          |  |  |  |
|----------|--|--|--|
| PACSIN3  |  |  |  |
| PAFAH1B1 |  |  |  |
| PAFAH1B2 |  |  |  |
| PAICS    |  |  |  |
| PAIP2    |  |  |  |
| PAK1     |  |  |  |
| PAK7     |  |  |  |
| PALLD    |  |  |  |
| PANK1    |  |  |  |
| PAPD5    |  |  |  |
| PAPOLA   |  |  |  |
| PAPSS1   |  |  |  |
| PARD3    |  |  |  |
| PARD3B   |  |  |  |
| PARD6A   |  |  |  |
| PARD6G   |  |  |  |
| PARG     |  |  |  |
| PARK2    |  |  |  |
| PARL     |  |  |  |
| PARN     |  |  |  |
| PARP10   |  |  |  |
| PARP2    |  |  |  |
| PARP6    |  |  |  |
| PARP9    |  |  |  |
| PART1    |  |  |  |
| PARVG    |  |  |  |
| PAX6     |  |  |  |
| PBDC1    |  |  |  |
| PBX4     |  |  |  |
| PBXIP1   |  |  |  |
| PCBD2    |  |  |  |
| PCBP4    |  |  |  |
| PCDH1    |  |  |  |
| PCDH11Y  |  |  |  |
| PCDH18   |  |  |  |
| PCDHA1   |  |  |  |
| PCDHB10  |  |  |  |
| PCDHB12  |  |  |  |
| PCDHB14  |  |  |  |
| PCDHB15  |  |  |  |
| PCDHB18  |  |  |  |
| PCDHB19P |  |  |  |
| PCDHB2   |  |  |  |
| PCDHB3   |  |  |  |

|         |  |  |  |
|---------|--|--|--|
| PCDHB6  |  |  |  |
| PCGF5   |  |  |  |
| PCLO    |  |  |  |
| PCMT1   |  |  |  |
| PCOLCE2 |  |  |  |
| PCP4    |  |  |  |
| PCP4L1  |  |  |  |
| PCSK2   |  |  |  |
| PCSK4   |  |  |  |
| PCSK5   |  |  |  |
| PCYOX1L |  |  |  |
| PDCD10  |  |  |  |
| PDCD6IP |  |  |  |
| PDCD7   |  |  |  |
| PDE10A  |  |  |  |
| PDE1A   |  |  |  |
| PDE1C   |  |  |  |
| PDE3B   |  |  |  |
| PDE4A   |  |  |  |
| PDE4DIP |  |  |  |
| PDE6B   |  |  |  |
| PDE8A   |  |  |  |
| PDGFC   |  |  |  |
| PDHB    |  |  |  |
| PDIA6   |  |  |  |
| PDIK1L  |  |  |  |
| PDK3    |  |  |  |
| PDLIM3  |  |  |  |
| PDLIM5  |  |  |  |
| PDLIM7  |  |  |  |
| PDP1    |  |  |  |
| PEA15   |  |  |  |
| PEBP1   |  |  |  |
| PEF1    |  |  |  |
| PEG10   |  |  |  |
| PELI3   |  |  |  |
| PEPD    |  |  |  |
| PEX11B  |  |  |  |
| PEX14   |  |  |  |
| PEX16   |  |  |  |
| PEX3    |  |  |  |
| PEX5    |  |  |  |
| PEX5L   |  |  |  |
| PFDN1   |  |  |  |



|         |  |  |  |
|---------|--|--|--|
| PFDN4   |  |  |  |
| PFKM    |  |  |  |
| PFKP    |  |  |  |
| PFN2    |  |  |  |
| PGA3    |  |  |  |
| PGAM1   |  |  |  |
| PGAP1   |  |  |  |
| PGAP2   |  |  |  |
| PGBD1   |  |  |  |
| PGBD4   |  |  |  |
| PGM3    |  |  |  |
| PGP     |  |  |  |
| PGS1    |  |  |  |
| PHACTR2 |  |  |  |
| PHF11   |  |  |  |
| PHF21B  |  |  |  |
| PHKG2   |  |  |  |
| PHLDA1  |  |  |  |
| PHLDB3  |  |  |  |
| PHRF1   |  |  |  |
| PHYHIP  |  |  |  |
| PHYHIPL |  |  |  |
| PI4K2B  |  |  |  |
| PI4KA   |  |  |  |
| PIEZO1  |  |  |  |
| PIGA    |  |  |  |
| PIGK    |  |  |  |
| PIGL    |  |  |  |
| PIGT    |  |  |  |
| PIGU    |  |  |  |
| PIGV    |  |  |  |
| PIGX    |  |  |  |
| PIGZ    |  |  |  |
| PIH1D1  |  |  |  |
| PIH1D2  |  |  |  |
| PIK3AP1 |  |  |  |
| PIK3C2B |  |  |  |
| PIK3CB  |  |  |  |
| PIK3CG  |  |  |  |
| PIK3R1  |  |  |  |
| PIK3R4  |  |  |  |
| PIK3R5  |  |  |  |
| PIM1    |  |  |  |
| PIN1    |  |  |  |

|         |  |  |  |
|---------|--|--|--|
| PINK1   |  |  |  |
| PIP4K2C |  |  |  |
| PIP5K1A |  |  |  |
| PIRT    |  |  |  |
| PITHD1  |  |  |  |
| PITPNC1 |  |  |  |
| PITRM1  |  |  |  |
| PJA2    |  |  |  |
| PKD1P6  |  |  |  |
| PKM     |  |  |  |
| PKN1    |  |  |  |
| PKN2    |  |  |  |
| PKNOX1  |  |  |  |
| PKNOX2  |  |  |  |
| PLA2G4C |  |  |  |
| PLA2G6  |  |  |  |
| PLAC9   |  |  |  |
| PLAUR   |  |  |  |
| PLB1    |  |  |  |
| PLBD1   |  |  |  |
| PLBD2   |  |  |  |
| PLCB1   |  |  |  |
| PLCB3   |  |  |  |
| PLCB4   |  |  |  |
| PLCD1   |  |  |  |
| PLCD3   |  |  |  |
| PLCD4   |  |  |  |
| PLCE1   |  |  |  |
| PLCL2   |  |  |  |
| PLD3    |  |  |  |
| PLEC    |  |  |  |
| PLEK    |  |  |  |
| PLEKHA4 |  |  |  |
| PLEKHA7 |  |  |  |
| PLEKHB2 |  |  |  |
| PLEKHF2 |  |  |  |
| PLEKHG1 |  |  |  |
| PLEKHG2 |  |  |  |
| PLEKHG3 |  |  |  |
| PLEKHH1 |  |  |  |
| PLEKHM3 |  |  |  |
| PLEKHO1 |  |  |  |
| PLIN2   |  |  |  |
| PLIN4   |  |  |  |

|         |  |  |  |
|---------|--|--|--|
| PLK5    |  |  |  |
| PLL     |  |  |  |
| PLOD1   |  |  |  |
| PLOD2   |  |  |  |
| PLP1    |  |  |  |
| PLSCR1  |  |  |  |
| PLSCR4  |  |  |  |
| PLTP    |  |  |  |
| PLVAP   |  |  |  |
| PLXDC1  |  |  |  |
| PLXDC2  |  |  |  |
| PLXNA2  |  |  |  |
| PLXNB2  |  |  |  |
| PM20D2  |  |  |  |
| PMEL    |  |  |  |
| PML     |  |  |  |
| PMPCB   |  |  |  |
| PMS1    |  |  |  |
| PMS2    |  |  |  |
| PMS2P1  |  |  |  |
| PNKD    |  |  |  |
| PNMA2   |  |  |  |
| PNMA3   |  |  |  |
| PNP     |  |  |  |
| PNPLA8  |  |  |  |
| PNRC2   |  |  |  |
| PODN    |  |  |  |
| POFUT1  |  |  |  |
| POFUT2  |  |  |  |
| POLD1   |  |  |  |
| POLDIP2 |  |  |  |
| POLE2   |  |  |  |
| POLE3   |  |  |  |
| POLR2B  |  |  |  |
| POLR2J  |  |  |  |
| POLR3E  |  |  |  |
| POLR3G  |  |  |  |
| POLR3K  |  |  |  |
| POLRMT  |  |  |  |
| POMGNT1 |  |  |  |
| PON2    |  |  |  |
| POP7    |  |  |  |
| POR     |  |  |  |
| PORCN   |  |  |  |

|             |  |  |  |
|-------------|--|--|--|
| POSTN       |  |  |  |
| POU6F1      |  |  |  |
| PPA1        |  |  |  |
| PPA2        |  |  |  |
| PPAP2B      |  |  |  |
| PPAPDC1A    |  |  |  |
| PPAPDC3     |  |  |  |
| PPARA       |  |  |  |
| PPARG       |  |  |  |
| PPARGC1B    |  |  |  |
| PPAT        |  |  |  |
| PPCS        |  |  |  |
| PPEF1       |  |  |  |
| PPIA        |  |  |  |
| PPIAP22     |  |  |  |
| PPIH        |  |  |  |
| PPIL6       |  |  |  |
| PPIP5K2     |  |  |  |
| PPM1AP1     |  |  |  |
| PPM1H       |  |  |  |
| PPM1L       |  |  |  |
| PPME1       |  |  |  |
| PPOX        |  |  |  |
| PPP1CA      |  |  |  |
| PPP1R11     |  |  |  |
| PPP1R12B    |  |  |  |
| PPP1R13L    |  |  |  |
| PPP1R14B    |  |  |  |
| PPP1R14C    |  |  |  |
| PPP1R16A    |  |  |  |
| PPP1R18     |  |  |  |
| PPP1R2      |  |  |  |
| PPP1R21     |  |  |  |
| PPP1R26-AS1 |  |  |  |
| PPP1R3B     |  |  |  |
| PPP1R3F     |  |  |  |
| PPP1R7      |  |  |  |
| PPP1R9A     |  |  |  |
| PPP2R1A     |  |  |  |
| PPP2R1B     |  |  |  |
| PPP2R2B     |  |  |  |
| PPP2R2D     |  |  |  |
| PPP2R3B     |  |  |  |
| PPP2R5A     |  |  |  |

|            |  |  |  |
|------------|--|--|--|
| PPP2R5B    |  |  |  |
| PPP2R5D    |  |  |  |
| PPP3CA     |  |  |  |
| PPP3CB     |  |  |  |
| PPP3R1     |  |  |  |
| PPP4C      |  |  |  |
| PPP4R2     |  |  |  |
| PPP5C      |  |  |  |
| PPP5D1     |  |  |  |
| PRC1       |  |  |  |
| PRCP       |  |  |  |
| PRDM4      |  |  |  |
| PRDX6      |  |  |  |
| PREP       |  |  |  |
| PREX2      |  |  |  |
| PRICKLE1   |  |  |  |
| PRICKLE3   |  |  |  |
| PRICKLE4   |  |  |  |
| PRKAB2     |  |  |  |
| PRKACB     |  |  |  |
| PRKAG2-AS1 |  |  |  |
| PRKAR1A    |  |  |  |
| PRKAR1B    |  |  |  |
| PRKAR2B    |  |  |  |
| PRKCB      |  |  |  |
| PRKCE      |  |  |  |
| PRKCQ      |  |  |  |
| PRKCQ-AS1  |  |  |  |
| PRKD1      |  |  |  |
| PRKD2      |  |  |  |
| PRKD3      |  |  |  |
| PRKG1      |  |  |  |
| PRKX       |  |  |  |
| PROB1      |  |  |  |
| PROCA1     |  |  |  |
| PROS1      |  |  |  |
| PRPF19     |  |  |  |
| PRPF3      |  |  |  |
| PRPF38A    |  |  |  |
| PRPF40A    |  |  |  |
| PRPF4B     |  |  |  |
| PRPF8      |  |  |  |
| PRPS1      |  |  |  |
| PRPS2      |  |  |  |

|          |  |  |  |
|----------|--|--|--|
| PRR18    |  |  |  |
| PRR22    |  |  |  |
| PRR4     |  |  |  |
| PRR5     |  |  |  |
| PRRT3    |  |  |  |
| PRRX1    |  |  |  |
| PRSS35   |  |  |  |
| PRSS51   |  |  |  |
| PRUNE2   |  |  |  |
| PSD4     |  |  |  |
| PSEN2    |  |  |  |
| PSG3     |  |  |  |
| PSG5     |  |  |  |
| PSMA4    |  |  |  |
| PSMA5    |  |  |  |
| PSMB2    |  |  |  |
| PSMB4    |  |  |  |
| PSMB5    |  |  |  |
| PSMB8    |  |  |  |
| PSMC1    |  |  |  |
| PSMC2    |  |  |  |
| PSMC3    |  |  |  |
| PSMC4    |  |  |  |
| PSMC6    |  |  |  |
| PSMD1    |  |  |  |
| PSMD12   |  |  |  |
| PSMD3    |  |  |  |
| PSMD4    |  |  |  |
| PSMD7    |  |  |  |
| PSMG3    |  |  |  |
| PSPH     |  |  |  |
| PSTPIP1  |  |  |  |
| PTAR1    |  |  |  |
| PTBP1    |  |  |  |
| PTBP3    |  |  |  |
| PTCHD2   |  |  |  |
| PTCHD4   |  |  |  |
| PTDSS2   |  |  |  |
| PTGES2   |  |  |  |
| PTGES3   |  |  |  |
| PTH2R    |  |  |  |
| PTP4A2P1 |  |  |  |
| PTPDC1   |  |  |  |
| PTPN1    |  |  |  |

|           |  |  |  |
|-----------|--|--|--|
| PTPN11    |  |  |  |
| PTPN12    |  |  |  |
| PTPN13    |  |  |  |
| PTPN22    |  |  |  |
| PTPN3     |  |  |  |
| PTPN6     |  |  |  |
| PTPN9     |  |  |  |
| PTPRC     |  |  |  |
| PTPRD     |  |  |  |
| PTPRZ1    |  |  |  |
| PTTG1     |  |  |  |
| PTTG1IP   |  |  |  |
| PUS10     |  |  |  |
| PVALB     |  |  |  |
| PVRL2     |  |  |  |
| PVT1      |  |  |  |
| PWP1      |  |  |  |
| PXDC1     |  |  |  |
| PXN       |  |  |  |
| PYCR1     |  |  |  |
| PYGL      |  |  |  |
| PYGO1     |  |  |  |
| QARS      |  |  |  |
| QDPR      |  |  |  |
| QRFPR     |  |  |  |
| QRICH1    |  |  |  |
| QTRT1     |  |  |  |
| R3HCC1    |  |  |  |
| R3HDM2    |  |  |  |
| RAB11A    |  |  |  |
| RAB11FIP1 |  |  |  |
| RAB11FIP5 |  |  |  |
| RAB13     |  |  |  |
| RAB14     |  |  |  |
| RAB20     |  |  |  |
| RAB21     |  |  |  |
| RAB27A    |  |  |  |
| RAB2A     |  |  |  |
| RAB31     |  |  |  |
| RAB33A    |  |  |  |
| RAB34     |  |  |  |
| RAB37     |  |  |  |
| RAB39A    |  |  |  |
| RAB39B    |  |  |  |

|             |  |  |  |
|-------------|--|--|--|
| RAB3A       |  |  |  |
| RAB3GAP2    |  |  |  |
| RAB3IL1     |  |  |  |
| RAB6B       |  |  |  |
| RAB7L1      |  |  |  |
| RAB8B       |  |  |  |
| RAB9B       |  |  |  |
| RABEPK      |  |  |  |
| RABGAP1L    |  |  |  |
| RABGGTA     |  |  |  |
| RABIF       |  |  |  |
| RAD1        |  |  |  |
| RAD23A      |  |  |  |
| RALB        |  |  |  |
| RALBP1      |  |  |  |
| RALGAPA1    |  |  |  |
| RALGAPA2    |  |  |  |
| RALGPS1     |  |  |  |
| RAMP1       |  |  |  |
| RAMP2       |  |  |  |
| RAMP3       |  |  |  |
| RANBP1      |  |  |  |
| RANBP3      |  |  |  |
| RANBP3L     |  |  |  |
| RANBP6      |  |  |  |
| RANGAP1     |  |  |  |
| RAP1B       |  |  |  |
| RAP1GDS1    |  |  |  |
| RAPGEF4-AS1 |  |  |  |
| RAPGEF5     |  |  |  |
| RAPGEF6     |  |  |  |
| RARRES3     |  |  |  |
| RASA1       |  |  |  |
| RASA4CP     |  |  |  |
| RASAL2-AS1  |  |  |  |
| RASAL3      |  |  |  |
| RASGEF1B    |  |  |  |
| RASGRF1     |  |  |  |
| RASGRP1     |  |  |  |
| RASSF10     |  |  |  |
| RASSF8      |  |  |  |
| RAVER1      |  |  |  |
| RAVER2      |  |  |  |
| RB1         |  |  |  |



|        |  |  |  |
|--------|--|--|--|
| RBBP4  |  |  |  |
| RBBP6  |  |  |  |
| RBFOX1 |  |  |  |
| RBM12B |  |  |  |
| RBM3   |  |  |  |
| RBM38  |  |  |  |
| RBM39  |  |  |  |
| RBM45  |  |  |  |
| RBM47  |  |  |  |
| RBMXP4 |  |  |  |
| RC3H1  |  |  |  |
| RCAN2  |  |  |  |
| RCC1   |  |  |  |
| RCN1   |  |  |  |
| RCN3   |  |  |  |
| RCOR2  |  |  |  |
| RCOR3  |  |  |  |
| RDH10  |  |  |  |
| RDH14  |  |  |  |
| RECQL4 |  |  |  |
| REEP1  |  |  |  |
| REEP2  |  |  |  |
| REL    |  |  |  |
| RELA   |  |  |  |
| RELL2  |  |  |  |
| REPS1  |  |  |  |
| REPS2  |  |  |  |
| RERGL  |  |  |  |
| RET    |  |  |  |
| RETSAT |  |  |  |
| REV3L  |  |  |  |
| RFC3   |  |  |  |
| RFNG   |  |  |  |
| RFPL1S |  |  |  |
| RFX2   |  |  |  |
| RFXANK |  |  |  |
| RGP1   |  |  |  |
| RGS14  |  |  |  |
| RGS16  |  |  |  |
| RGS19  |  |  |  |
| RGS2   |  |  |  |
| RGS20  |  |  |  |
| RGS22  |  |  |  |
| RGS4   |  |  |  |

|           |  |  |  |
|-----------|--|--|--|
| RGS6      |  |  |  |
| RGS7      |  |  |  |
| RHBDF1    |  |  |  |
| RHBDF2    |  |  |  |
| RHOBTB1   |  |  |  |
| RHOBTB3   |  |  |  |
| RHOC      |  |  |  |
| RHOQ      |  |  |  |
| RHOQP3    |  |  |  |
| RHPN2     |  |  |  |
| RILP      |  |  |  |
| RIMKLB    |  |  |  |
| RIMS3     |  |  |  |
| RIN1      |  |  |  |
| RIN3      |  |  |  |
| RINT1     |  |  |  |
| RIOK1     |  |  |  |
| RIPK1     |  |  |  |
| RIPK2     |  |  |  |
| RIT1      |  |  |  |
| RMND5B    |  |  |  |
| RN7SL737P |  |  |  |
| RNASE1    |  |  |  |
| RNASEH1   |  |  |  |
| RNASET2   |  |  |  |
| RNF112    |  |  |  |
| RNF113A   |  |  |  |
| RNF114    |  |  |  |
| RNF121    |  |  |  |
| RNF122    |  |  |  |
| RNF135    |  |  |  |
| RNF14     |  |  |  |
| RNF144A   |  |  |  |
| RNF146    |  |  |  |
| RNF149    |  |  |  |
| RNF157    |  |  |  |
| RNF167    |  |  |  |
| RNF169    |  |  |  |
| RNF175    |  |  |  |
| RNF182    |  |  |  |
| RNF185    |  |  |  |
| RNF187    |  |  |  |
| RNF215    |  |  |  |
| RNF217    |  |  |  |

|          |  |  |  |
|----------|--|--|--|
| RNF220   |  |  |  |
| RNF26    |  |  |  |
| RNF34    |  |  |  |
| RNF5     |  |  |  |
| RNF5P1   |  |  |  |
| RNFT2    |  |  |  |
| RNMT     |  |  |  |
| ROBO3    |  |  |  |
| ROCK1    |  |  |  |
| ROCK2    |  |  |  |
| ROGDI    |  |  |  |
| ROM1     |  |  |  |
| ROS1     |  |  |  |
| RP2      |  |  |  |
| RP9      |  |  |  |
| RPAIN    |  |  |  |
| RPF1     |  |  |  |
| RPH3A    |  |  |  |
| RPL12    |  |  |  |
| RPL12P4  |  |  |  |
| RPL17P50 |  |  |  |
| RPL18A   |  |  |  |
| RPL23    |  |  |  |
| RPL23A   |  |  |  |
| RPL23P2  |  |  |  |
| RPL24    |  |  |  |
| RPL27A   |  |  |  |
| RPL28    |  |  |  |
| RPL34    |  |  |  |
| RPL37    |  |  |  |
| RPL5P34  |  |  |  |
| RPL6     |  |  |  |
| RPLP0    |  |  |  |
| RPLP1    |  |  |  |
| RPLP2    |  |  |  |
| RPN2     |  |  |  |
| RPP25    |  |  |  |
| RPRD1B   |  |  |  |
| RPS15A   |  |  |  |
| RPS19    |  |  |  |
| RPS2     |  |  |  |
| RPS20    |  |  |  |
| RPS24    |  |  |  |
| RPS27L   |  |  |  |

|            |  |  |  |
|------------|--|--|--|
| RPS3       |  |  |  |
| RPS6       |  |  |  |
| RPS6KL1    |  |  |  |
| RPS7       |  |  |  |
| RPUSD2     |  |  |  |
| RPUSD4     |  |  |  |
| RRAD       |  |  |  |
| RRAGA      |  |  |  |
| RRAGD      |  |  |  |
| RRAS       |  |  |  |
| RRAS2      |  |  |  |
| RREB1      |  |  |  |
| RSBN1L-AS1 |  |  |  |
| RSL24D1    |  |  |  |
| RSPH4A     |  |  |  |
| RSRC1      |  |  |  |
| RSU1       |  |  |  |
| RTCA       |  |  |  |
| RTCB       |  |  |  |
| RTKN2      |  |  |  |
| RTN1       |  |  |  |
| RTN3       |  |  |  |
| RTN4       |  |  |  |
| RTN4IP1    |  |  |  |
| RTN4R      |  |  |  |
| RUFY2      |  |  |  |
| RUNDC3B    |  |  |  |
| RUNX1      |  |  |  |
| RUSC1      |  |  |  |
| RWDD1      |  |  |  |
| RWDD2B     |  |  |  |
| RXFP1      |  |  |  |
| RXRA       |  |  |  |
| RYK        |  |  |  |
| RYR1       |  |  |  |
| RYR2       |  |  |  |
| S100A10    |  |  |  |
| S100A16    |  |  |  |
| S100A9     |  |  |  |
| S1PR1      |  |  |  |
| S1PR3      |  |  |  |
| S1PR5      |  |  |  |
| SAE1       |  |  |  |
| SALL3      |  |  |  |

|           |  |  |  |
|-----------|--|--|--|
| SAMD12    |  |  |  |
| SAMD15    |  |  |  |
| SAMD4A    |  |  |  |
| SAMD5     |  |  |  |
| SAMD8     |  |  |  |
| SAMD9L    |  |  |  |
| SAMHD1    |  |  |  |
| SAMM50    |  |  |  |
| SAMSN1    |  |  |  |
| SAP30L    |  |  |  |
| SARDH     |  |  |  |
| SARS      |  |  |  |
| SASH1     |  |  |  |
| SASH3     |  |  |  |
| SAT1      |  |  |  |
| SATB2-AS1 |  |  |  |
| SBF2      |  |  |  |
| SBNO1     |  |  |  |
| SBNO2     |  |  |  |
| SCAI      |  |  |  |
| SCAMP1    |  |  |  |
| SCAMP5    |  |  |  |
| SCAND2P   |  |  |  |
| SCARA3    |  |  |  |
| SCARB2    |  |  |  |
| SCG5      |  |  |  |
| SCIN      |  |  |  |
| SCML1     |  |  |  |
| SCML2     |  |  |  |
| SCN1B     |  |  |  |
| SCN2A     |  |  |  |
| SCN2B     |  |  |  |
| SCN4B     |  |  |  |
| SCN8A     |  |  |  |
| SCN9A     |  |  |  |
| SCOC      |  |  |  |
| SCRG1     |  |  |  |
| SCRIB     |  |  |  |
| SCRN2     |  |  |  |
| SCRT1     |  |  |  |
| SDC1      |  |  |  |
| SDC2      |  |  |  |
| SDC4      |  |  |  |
| SDF2L1    |  |  |  |

|             |  |  |  |
|-------------|--|--|--|
| SDF4        |  |  |  |
| SDHA        |  |  |  |
| SDHAP3      |  |  |  |
| SDHB        |  |  |  |
| SDR39U1     |  |  |  |
| SDS         |  |  |  |
| SDSL        |  |  |  |
| SEC11A      |  |  |  |
| SEC14L5     |  |  |  |
| SEC23A      |  |  |  |
| SEC24A      |  |  |  |
| SEC61A1     |  |  |  |
| SECISBP2    |  |  |  |
| SELRC1      |  |  |  |
| SEMA3A      |  |  |  |
| SEMA3B      |  |  |  |
| SEMA3G      |  |  |  |
| SEMA4B      |  |  |  |
| SEMA4C      |  |  |  |
| SEMA7A      |  |  |  |
| SENP2       |  |  |  |
| SEPN1       |  |  |  |
| SEPT14      |  |  |  |
| SEPT7P2     |  |  |  |
| SEPT9       |  |  |  |
| SERBP1      |  |  |  |
| SERGEF      |  |  |  |
| SERINC1     |  |  |  |
| SERINC3     |  |  |  |
| SERP1       |  |  |  |
| SERP2       |  |  |  |
| SERPINA1    |  |  |  |
| SERPINA3    |  |  |  |
| SERPINB9    |  |  |  |
| SERPINE1    |  |  |  |
| SERPINE2    |  |  |  |
| SERPING1    |  |  |  |
| SERPINH1    |  |  |  |
| SERPINI1    |  |  |  |
| SERTAD2     |  |  |  |
| SERTAD4     |  |  |  |
| SERTAD4-AS1 |  |  |  |
| SESN2       |  |  |  |
| SESTD1      |  |  |  |

|            |  |  |  |
|------------|--|--|--|
| SETD4      |  |  |  |
| SETD5-AS1  |  |  |  |
| SETD9      |  |  |  |
| SEZ6L2     |  |  |  |
| SFMBT2     |  |  |  |
| SFXN4      |  |  |  |
| SGCD       |  |  |  |
| SGIP1      |  |  |  |
| SGK2       |  |  |  |
| SGMS2      |  |  |  |
| SGPL1      |  |  |  |
| SGSH       |  |  |  |
| SGTB       |  |  |  |
| SH2B2      |  |  |  |
| SH2B3      |  |  |  |
| SH2D4A     |  |  |  |
| SH3BGRL2   |  |  |  |
| SH3BGRL3   |  |  |  |
| SH3D19     |  |  |  |
| SH3GL2     |  |  |  |
| SH3GL3     |  |  |  |
| SH3GLB1    |  |  |  |
| SH3GLB2    |  |  |  |
| SH3RF3     |  |  |  |
| SH3RF3-AS1 |  |  |  |
| SH3TC1     |  |  |  |
| SH3TC2     |  |  |  |
| SHC1       |  |  |  |
| SHD        |  |  |  |
| SHKBP1     |  |  |  |
| SHMT2      |  |  |  |
| SHROOM4    |  |  |  |
| SIAE       |  |  |  |
| SIPA1      |  |  |  |
| SIX4       |  |  |  |
| SKIV2L     |  |  |  |
| SKP1       |  |  |  |
| SLAIN2     |  |  |  |
| SLC10A1    |  |  |  |
| SLC10A4    |  |  |  |
| SLC11A1    |  |  |  |
| SLC12A5    |  |  |  |
| SLC12A7    |  |  |  |
| SLC12A8    |  |  |  |

|          |  |  |  |
|----------|--|--|--|
| SLC15A3  |  |  |  |
| SLC16A10 |  |  |  |
| SLC16A3  |  |  |  |
| SLC16A7  |  |  |  |
| SLC16A9  |  |  |  |
| SLC17A5  |  |  |  |
| SLC17A9  |  |  |  |
| SLC19A1  |  |  |  |
| SLC1A3   |  |  |  |
| SLC1A4   |  |  |  |
| SLC1A5   |  |  |  |
| SLC22A15 |  |  |  |
| SLC22A17 |  |  |  |
| SLC22A24 |  |  |  |
| SLC22A3  |  |  |  |
| SLC24A2  |  |  |  |
| SLC24A6  |  |  |  |
| SLC25A11 |  |  |  |
| SLC25A12 |  |  |  |
| SLC25A14 |  |  |  |
| SLC25A15 |  |  |  |
| SLC25A17 |  |  |  |
| SLC25A20 |  |  |  |
| SLC25A27 |  |  |  |
| SLC25A3  |  |  |  |
| SLC25A30 |  |  |  |
| SLC25A33 |  |  |  |
| SLC25A36 |  |  |  |
| SLC25A39 |  |  |  |
| SLC25A4  |  |  |  |
| SLC25A40 |  |  |  |
| SLC25A41 |  |  |  |
| SLC25A46 |  |  |  |
| SLC25A5  |  |  |  |
| SLC25A53 |  |  |  |
| SLC26A11 |  |  |  |
| SLC27A4  |  |  |  |
| SLC29A1  |  |  |  |
| SLC29A4  |  |  |  |
| SLC2A10  |  |  |  |
| SLC2A11  |  |  |  |
| SLC2A12  |  |  |  |
| SLC2A4   |  |  |  |
| SLC2A4RG |  |  |  |



|          |  |  |  |
|----------|--|--|--|
| SLC2A5   |  |  |  |
| SLC2A8   |  |  |  |
| SLC2A9   |  |  |  |
| SLC30A1  |  |  |  |
| SLC30A10 |  |  |  |
| SLC30A5  |  |  |  |
| SLC30A7  |  |  |  |
| SLC30A9  |  |  |  |
| SLC32A1  |  |  |  |
| SLC35B3  |  |  |  |
| SLC35B4  |  |  |  |
| SLC35C2  |  |  |  |
| SLC35F3  |  |  |  |
| SLC35F5  |  |  |  |
| SLC35G1  |  |  |  |
| SLC36A1  |  |  |  |
| SLC36A4  |  |  |  |
| SLC38A1  |  |  |  |
| SLC38A11 |  |  |  |
| SLC38A5  |  |  |  |
| SLC39A1  |  |  |  |
| SLC39A10 |  |  |  |
| SLC39A12 |  |  |  |
| SLC39A7  |  |  |  |
| SLC3A2   |  |  |  |
| SLC41A1  |  |  |  |
| SLC43A1  |  |  |  |
| SLC43A3  |  |  |  |
| SLC44A1  |  |  |  |
| SLC44A3  |  |  |  |
| SLC45A1  |  |  |  |
| SLC4A10  |  |  |  |
| SLC4A11  |  |  |  |
| SLC4A4   |  |  |  |
| SLC4A8   |  |  |  |
| SLC50A1  |  |  |  |
| SLC5A11  |  |  |  |
| SLC5A2   |  |  |  |
| SLC6A11  |  |  |  |
| SLC6A15  |  |  |  |
| SLC6A17  |  |  |  |
| SLC6A6   |  |  |  |
| SLC6A7   |  |  |  |
| SLC7A11  |  |  |  |

|             |  |  |  |
|-------------|--|--|--|
| SLC7A11-AS1 |  |  |  |
| SLC7A2      |  |  |  |
| SLC7A5      |  |  |  |
| SLC7A8      |  |  |  |
| SLC8A1      |  |  |  |
| SLC8A1-AS1  |  |  |  |
| SLC9A6      |  |  |  |
| SLC9A9      |  |  |  |
| SLC9B2      |  |  |  |
| SLCO1A2     |  |  |  |
| SLFN11      |  |  |  |
| SLFNL1      |  |  |  |
| SLITRK1     |  |  |  |
| SLITRK3     |  |  |  |
| SLMO2       |  |  |  |
| SLU7        |  |  |  |
| SLX4IP      |  |  |  |
| SMAD1       |  |  |  |
| SMAD4       |  |  |  |
| SMAD5       |  |  |  |
| SMAD9       |  |  |  |
| SMAP2       |  |  |  |
| SMARCA1     |  |  |  |
| SMARCE1P5   |  |  |  |
| SMC3        |  |  |  |
| SMC5        |  |  |  |
| SMEK1       |  |  |  |
| SMEK2       |  |  |  |
| SMG1        |  |  |  |
| SMG6        |  |  |  |
| SMIM10      |  |  |  |
| SMIM13      |  |  |  |
| SMIM14      |  |  |  |
| SMIM15      |  |  |  |
| SMIM19      |  |  |  |
| SMIM20      |  |  |  |
| SMIM4       |  |  |  |
| SMNDC1      |  |  |  |
| SMO         |  |  |  |
| SMOX        |  |  |  |
| SMPX        |  |  |  |
| SMTN        |  |  |  |
| SMTNL1      |  |  |  |
| SMUG1       |  |  |  |

|         |  |  |  |
|---------|--|--|--|
| SMURF2  |  |  |  |
| SMYD2   |  |  |  |
| SNAP23  |  |  |  |
| SNAP91  |  |  |  |
| SNCA    |  |  |  |
| SNCB    |  |  |  |
| SNHG11  |  |  |  |
| SNHG12  |  |  |  |
| SNHG16  |  |  |  |
| SNHG5   |  |  |  |
| SNN     |  |  |  |
| SNRK    |  |  |  |
| SNRNP25 |  |  |  |
| SNRPA   |  |  |  |
| SNRPC   |  |  |  |
| SNRPG   |  |  |  |
| SNRPN   |  |  |  |
| SNTA1   |  |  |  |
| SNTG1   |  |  |  |
| SNURF   |  |  |  |
| SNX10   |  |  |  |
| SNX14   |  |  |  |
| SNX17   |  |  |  |
| SNX18   |  |  |  |
| SNX20   |  |  |  |
| SNX22   |  |  |  |
| SNX30   |  |  |  |
| SNX4    |  |  |  |
| SNX5    |  |  |  |
| SOAT1   |  |  |  |
| SOCS3   |  |  |  |
| SOCS4   |  |  |  |
| SOCS5   |  |  |  |
| SOD2    |  |  |  |
| SOD3    |  |  |  |
| SORL1   |  |  |  |
| SOWAHB  |  |  |  |
| SOWAHC  |  |  |  |
| SOX4    |  |  |  |
| SOX6    |  |  |  |
| SP100   |  |  |  |
| SP110   |  |  |  |
| SPAG6   |  |  |  |
| SPAG7   |  |  |  |

|         |  |  |  |
|---------|--|--|--|
| SPATA1  |  |  |  |
| SPATA17 |  |  |  |
| SPATA7  |  |  |  |
| SPATS2L |  |  |  |
| SPDEF   |  |  |  |
| SPG20   |  |  |  |
| SPHK1   |  |  |  |
| SPHK2   |  |  |  |
| SPI1    |  |  |  |
| SPIN2A  |  |  |  |
| SPIN2B  |  |  |  |
| SPIN3   |  |  |  |
| SPINT1  |  |  |  |
| SPINT2  |  |  |  |
| SPOCD1  |  |  |  |
| SPOCK2  |  |  |  |
| SPOCK3  |  |  |  |
| SPON1   |  |  |  |
| SPPL2A  |  |  |  |
| SPR     |  |  |  |
| SPRED1  |  |  |  |
| SPRY1   |  |  |  |
| SPRYD3  |  |  |  |
| SPRYD7  |  |  |  |
| SPSB2   |  |  |  |
| SPTLC3  |  |  |  |
| SPTSSB  |  |  |  |
| SPTY2D1 |  |  |  |
| SQRDL   |  |  |  |
| SQSTM1  |  |  |  |
| SRCIN1  |  |  |  |
| SRCRB4D |  |  |  |
| SRD5A1  |  |  |  |
| SRD5A3  |  |  |  |
| SREK1   |  |  |  |
| SRF     |  |  |  |
| SRGAP1  |  |  |  |
| SRGAP3  |  |  |  |
| SRGN    |  |  |  |
| SRI     |  |  |  |
| SRL     |  |  |  |
| SRP19   |  |  |  |
| SRPK2   |  |  |  |
| SRRM1   |  |  |  |

|            |  |  |  |
|------------|--|--|--|
| SRRM4      |  |  |  |
| SRRT       |  |  |  |
| SRSF10     |  |  |  |
| SRSF11     |  |  |  |
| SS18       |  |  |  |
| SSBP3      |  |  |  |
| SSFA2      |  |  |  |
| SSR3       |  |  |  |
| SSSCA1-AS1 |  |  |  |
| SST        |  |  |  |
| SSX2IP     |  |  |  |
| ST13       |  |  |  |
| ST13P5     |  |  |  |
| ST13P6     |  |  |  |
| ST14       |  |  |  |
| ST18       |  |  |  |
| ST3GAL5    |  |  |  |
| ST5        |  |  |  |
| ST6GALNAC1 |  |  |  |
| ST8SIA1    |  |  |  |
| STAG3      |  |  |  |
| STAG3L4    |  |  |  |
| STAM       |  |  |  |
| STAMBPL1   |  |  |  |
| STARD4-AS1 |  |  |  |
| STARD8     |  |  |  |
| STARD9     |  |  |  |
| STAT4      |  |  |  |
| STAU2      |  |  |  |
| STEAP3     |  |  |  |
| STIP1      |  |  |  |
| STK16      |  |  |  |
| STK17A     |  |  |  |
| STK17B     |  |  |  |
| STK38      |  |  |  |
| STK38L     |  |  |  |
| STK39      |  |  |  |
| STMN1      |  |  |  |
| STMN2      |  |  |  |
| STMN3      |  |  |  |
| STOM       |  |  |  |
| STON2      |  |  |  |
| STPG1      |  |  |  |
| STRA6      |  |  |  |

|            |  |  |  |
|------------|--|--|--|
| STRBP      |  |  |  |
| STRIP1     |  |  |  |
| STRN       |  |  |  |
| STS        |  |  |  |
| STX12      |  |  |  |
| STX1A      |  |  |  |
| STX1B      |  |  |  |
| STX3       |  |  |  |
| STXBP1     |  |  |  |
| STXBP2     |  |  |  |
| STXBP4     |  |  |  |
| STXBP5     |  |  |  |
| STXBP5-AS1 |  |  |  |
| STXBP5L    |  |  |  |
| STYX       |  |  |  |
| STYXL1     |  |  |  |
| SUCLA2     |  |  |  |
| SUCLG1     |  |  |  |
| SUCLG2     |  |  |  |
| SUCO       |  |  |  |
| SUDS3      |  |  |  |
| SUGP2      |  |  |  |
| SUGT1      |  |  |  |
| SUMO1      |  |  |  |
| SUMO3      |  |  |  |
| SUPT16H    |  |  |  |
| SUPT20H    |  |  |  |
| SUPT5H     |  |  |  |
| SUPV3L1    |  |  |  |
| SUSD4      |  |  |  |
| SUSD5      |  |  |  |
| SUV39H1    |  |  |  |
| SV2A       |  |  |  |
| SV2B       |  |  |  |
| SVEP1      |  |  |  |
| SVOP       |  |  |  |
| SWAP70     |  |  |  |
| SWT1       |  |  |  |
| SYBU       |  |  |  |
| SYDE1      |  |  |  |
| SYNC       |  |  |  |
| SYNDIG1    |  |  |  |
| SYNGR1     |  |  |  |
| SYNGR3     |  |  |  |

|          |  |  |  |
|----------|--|--|--|
| SYNJ1    |  |  |  |
| SYNJ2    |  |  |  |
| SYNPO2   |  |  |  |
| SYP      |  |  |  |
| SYPL2    |  |  |  |
| SYT1     |  |  |  |
| SYT11    |  |  |  |
| SYT12    |  |  |  |
| SYT13    |  |  |  |
| SYT16    |  |  |  |
| SYT17    |  |  |  |
| SYT2     |  |  |  |
| SYT3     |  |  |  |
| SYT4     |  |  |  |
| TAB1     |  |  |  |
| TAB2     |  |  |  |
| TACR3    |  |  |  |
| TADA1    |  |  |  |
| TADA2A   |  |  |  |
| TADA2B   |  |  |  |
| TAF4B    |  |  |  |
| TAGLN2   |  |  |  |
| TAGLN3   |  |  |  |
| TARBP1   |  |  |  |
| TASPI    |  |  |  |
| TATDN2   |  |  |  |
| TBC1D10A |  |  |  |
| TBC1D10B |  |  |  |
| TBC1D22B |  |  |  |
| TBC1D25  |  |  |  |
| TBC1D30  |  |  |  |
| TBC1D4   |  |  |  |
| TBC1D7   |  |  |  |
| TBC1D9   |  |  |  |
| TBCC     |  |  |  |
| TBK1     |  |  |  |
| TBL1X    |  |  |  |
| TBP      |  |  |  |
| TBR1     |  |  |  |
| TBRG1    |  |  |  |
| TBX15    |  |  |  |
| TCAP     |  |  |  |
| TCEA1    |  |  |  |
| TCEA3    |  |  |  |

|          |  |  |  |
|----------|--|--|--|
| TCEAL1   |  |  |  |
| TCEAL7   |  |  |  |
| TCEB3    |  |  |  |
| TCERG1   |  |  |  |
| TCF12    |  |  |  |
| TCF3     |  |  |  |
| TCIRG1   |  |  |  |
| TCTEX1D1 |  |  |  |
| TDP2     |  |  |  |
| TDRKH    |  |  |  |
| TEAD1    |  |  |  |
| TEAD3    |  |  |  |
| TECPR2   |  |  |  |
| TECR     |  |  |  |
| TEP1     |  |  |  |
| TERF2IP  |  |  |  |
| TES      |  |  |  |
| TESC     |  |  |  |
| TESPA1   |  |  |  |
| TET2     |  |  |  |
| TEX14    |  |  |  |
| TEX15    |  |  |  |
| TF       |  |  |  |
| TFB1M    |  |  |  |
| TFE3     |  |  |  |
| TG       |  |  |  |
| TGFB1    |  |  |  |
| TGFB2    |  |  |  |
| TGFBRAP1 |  |  |  |
| TGIF1    |  |  |  |
| TGM2     |  |  |  |
| THAP1    |  |  |  |
| THAP2    |  |  |  |
| THAP7    |  |  |  |
| THBD     |  |  |  |
| THBS1    |  |  |  |
| THBS4    |  |  |  |
| THEM6    |  |  |  |
| THEMIS   |  |  |  |
| THOC5    |  |  |  |
| THYN1    |  |  |  |
| TICRR    |  |  |  |
| TIFA     |  |  |  |
| TIGD4    |  |  |  |



|          |  |  |  |
|----------|--|--|--|
| TIMM17A  |  |  |  |
| TIMM17B  |  |  |  |
| TIMP2    |  |  |  |
| TIPARP   |  |  |  |
| TIPRL    |  |  |  |
| TKT      |  |  |  |
| TLCD1    |  |  |  |
| TLE1     |  |  |  |
| TLE3     |  |  |  |
| TLN1     |  |  |  |
| TLR2     |  |  |  |
| TLR4     |  |  |  |
| TLR5     |  |  |  |
| TM2D3    |  |  |  |
| TM4SF1   |  |  |  |
| TM6SF1   |  |  |  |
| TM7SF3   |  |  |  |
| TMA16    |  |  |  |
| TMBIM6   |  |  |  |
| TMC5     |  |  |  |
| TMC7     |  |  |  |
| TMC8     |  |  |  |
| TMCO1    |  |  |  |
| TMCO4    |  |  |  |
| TMED10   |  |  |  |
| TMED3    |  |  |  |
| TMED5    |  |  |  |
| TMEFF2   |  |  |  |
| TMEM100  |  |  |  |
| TMEM120A |  |  |  |
| TMEM125  |  |  |  |
| TMEM133  |  |  |  |
| TMEM144  |  |  |  |
| TMEM14A  |  |  |  |
| TMEM150C |  |  |  |
| TMEM151A |  |  |  |
| TMEM155  |  |  |  |
| TMEM160  |  |  |  |
| TMEM161A |  |  |  |
| TMEM164  |  |  |  |
| TMEM167B |  |  |  |
| TMEM169  |  |  |  |
| TMEM17   |  |  |  |
| TMEM175  |  |  |  |

|            |  |  |  |
|------------|--|--|--|
| TMEM176A   |  |  |  |
| TMEM176B   |  |  |  |
| TMEM177    |  |  |  |
| TMEM178A   |  |  |  |
| TMEM183A   |  |  |  |
| TMEM184A   |  |  |  |
| TMEM185B   |  |  |  |
| TMEM191C   |  |  |  |
| TMEM194B   |  |  |  |
| TMEM203    |  |  |  |
| TMEM235    |  |  |  |
| TMEM240    |  |  |  |
| TMEM25     |  |  |  |
| TMEM255A   |  |  |  |
| TMEM26     |  |  |  |
| TMEM30A    |  |  |  |
| TMEM38A    |  |  |  |
| TMEM43     |  |  |  |
| TMEM44-AS1 |  |  |  |
| TMEM47     |  |  |  |
| TMEM51     |  |  |  |
| TMEM55A    |  |  |  |
| TMEM55B    |  |  |  |
| TMEM63A    |  |  |  |
| TMEM63B    |  |  |  |
| TMEM72-AS1 |  |  |  |
| TMEM88B    |  |  |  |
| TMEM8A     |  |  |  |
| TMOD3      |  |  |  |
| TMSB4Y     |  |  |  |
| TMTC4      |  |  |  |
| TMUB1      |  |  |  |
| TMX1       |  |  |  |
| TMX4       |  |  |  |
| TNFAIP3    |  |  |  |
| TNFAIP8    |  |  |  |
| TNFRSF10B  |  |  |  |
| TNFRSF10D  |  |  |  |
| TNFRSF11B  |  |  |  |
| TNFRSF1A   |  |  |  |
| TNFRSF1B   |  |  |  |
| TNFRSF21   |  |  |  |
| TNFSF10    |  |  |  |
| TNFSF13B   |  |  |  |

|          |  |  |  |
|----------|--|--|--|
| TNIP1    |  |  |  |
| TNIP2    |  |  |  |
| TNIP3    |  |  |  |
| TNKS1BP1 |  |  |  |
| TNNT2    |  |  |  |
| TNPO1    |  |  |  |
| TOB1     |  |  |  |
| TOMM20   |  |  |  |
| TOMM40   |  |  |  |
| TOMM40L  |  |  |  |
| TOMM70A  |  |  |  |
| TOP1     |  |  |  |
| TOP2B    |  |  |  |
| TOPBP1   |  |  |  |
| TOPORS   |  |  |  |
| TOR1A    |  |  |  |
| TOR1AIP2 |  |  |  |
| TOR1B    |  |  |  |
| TOR4A    |  |  |  |
| TOX2     |  |  |  |
| TP53     |  |  |  |
| TPBG     |  |  |  |
| TPD52L1  |  |  |  |
| TPD52L2  |  |  |  |
| TPI1     |  |  |  |
| TPM2     |  |  |  |
| TPP1     |  |  |  |
| TPP2     |  |  |  |
| TPRG1    |  |  |  |
| TPST1    |  |  |  |
| TPT1     |  |  |  |
| TRA2B    |  |  |  |
| TRABD    |  |  |  |
| TRAF3IP2 |  |  |  |
| TRAIP    |  |  |  |
| TRAM1L1  |  |  |  |
| TRAPPC10 |  |  |  |
| TRAPPC11 |  |  |  |
| TRAPPC13 |  |  |  |
| TRAPPC2L |  |  |  |
| TRAPPC3  |  |  |  |
| TRAPPC6B |  |  |  |
| TRAPPC9  |  |  |  |
| TRBC2    |  |  |  |

|           |  |  |  |
|-----------|--|--|--|
| TRHDE     |  |  |  |
| TRIM14    |  |  |  |
| TRIM2     |  |  |  |
| TRIM23    |  |  |  |
| TRIM25    |  |  |  |
| TRIM27    |  |  |  |
| TRIM3     |  |  |  |
| TRIM33    |  |  |  |
| TRIM36    |  |  |  |
| TRIM37    |  |  |  |
| TRIM4     |  |  |  |
| TRIM44    |  |  |  |
| TRIM5     |  |  |  |
| TRIM59    |  |  |  |
| TRIM60P18 |  |  |  |
| TRIM66    |  |  |  |
| TRIM69    |  |  |  |
| TRIM71    |  |  |  |
| TRIM72    |  |  |  |
| TRIM73    |  |  |  |
| TRIO      |  |  |  |
| TRIP10    |  |  |  |
| TRIP13    |  |  |  |
| TRIP6     |  |  |  |
| TRMT11    |  |  |  |
| TRO       |  |  |  |
| TROVE2    |  |  |  |
| TRPC1     |  |  |  |
| TRPC3     |  |  |  |
| TRPC4AP   |  |  |  |
| TRPS1     |  |  |  |
| TRUB1     |  |  |  |
| TRUB2     |  |  |  |
| TSC1      |  |  |  |
| TSC2      |  |  |  |
| TSEN34    |  |  |  |
| TSFM      |  |  |  |
| TSHR      |  |  |  |
| TSPAN12   |  |  |  |
| TSPAN15   |  |  |  |
| TSPAN33   |  |  |  |
| TSPAN4    |  |  |  |
| TSPAN5    |  |  |  |
| TSPAN6    |  |  |  |

|         |  |  |  |
|---------|--|--|--|
| TSPYL5  |  |  |  |
| TSR2    |  |  |  |
| TSTD2   |  |  |  |
| TTBK2   |  |  |  |
| TTC1    |  |  |  |
| TTC13   |  |  |  |
| TTC19   |  |  |  |
| TTC21B  |  |  |  |
| TTC22   |  |  |  |
| TTC23   |  |  |  |
| TTC28   |  |  |  |
| TTC37   |  |  |  |
| TTC38   |  |  |  |
| TTC39B  |  |  |  |
| TTC9C   |  |  |  |
| TTF1    |  |  |  |
| TTL     |  |  |  |
| TTLL12  |  |  |  |
| TTLL7   |  |  |  |
| TPPA    |  |  |  |
| TTY10   |  |  |  |
| TTY15   |  |  |  |
| TYH2    |  |  |  |
| TUBA1A  |  |  |  |
| TUBA4A  |  |  |  |
| TUBB    |  |  |  |
| TUBB1   |  |  |  |
| TUBB2A  |  |  |  |
| TUBB2B  |  |  |  |
| TUBB4A  |  |  |  |
| TUBB4B  |  |  |  |
| TUBB6   |  |  |  |
| TUBBP1  |  |  |  |
| TUBG1   |  |  |  |
| TUBG2   |  |  |  |
| TUBGCP3 |  |  |  |
| TUBGCP4 |  |  |  |
| TUBGCP5 |  |  |  |
| TUBGCP6 |  |  |  |
| TUG1    |  |  |  |
| TULP4   |  |  |  |
| TUSC2   |  |  |  |
| TUSC3   |  |  |  |
| TXLNA   |  |  |  |

|           |  |  |  |
|-----------|--|--|--|
| TXLNG2P   |  |  |  |
| TXNDC16   |  |  |  |
| TXNDC9    |  |  |  |
| TXNIP     |  |  |  |
| TXNL4B    |  |  |  |
| TYK2      |  |  |  |
| TYMP      |  |  |  |
| TYMS      |  |  |  |
| TYRO3     |  |  |  |
| TYSND1    |  |  |  |
| TYW1B     |  |  |  |
| UBA3      |  |  |  |
| UBAP1L    |  |  |  |
| UBAP2     |  |  |  |
| UBE2E3    |  |  |  |
| UBE2FP3   |  |  |  |
| UBE2H     |  |  |  |
| UBE2I     |  |  |  |
| UBE2J2    |  |  |  |
| UBE2L6    |  |  |  |
| UBE2N     |  |  |  |
| UBE2QL1   |  |  |  |
| UBE2T     |  |  |  |
| UBE2V2    |  |  |  |
| UBE3C     |  |  |  |
| UBL4A     |  |  |  |
| UBL7      |  |  |  |
| UBLCP1    |  |  |  |
| UBR3      |  |  |  |
| UBTD1     |  |  |  |
| UBXN4     |  |  |  |
| UCHL1     |  |  |  |
| UCHL5     |  |  |  |
| UCP2      |  |  |  |
| UFSP2     |  |  |  |
| UGDH      |  |  |  |
| UGGT1     |  |  |  |
| UGP2      |  |  |  |
| UGT8      |  |  |  |
| UHRF1BP1L |  |  |  |
| UHRF2     |  |  |  |
| ULK3      |  |  |  |
| UNC13A    |  |  |  |
| UNC13D    |  |  |  |

|         |  |  |  |
|---------|--|--|--|
| UNC50   |  |  |  |
| UNC5C   |  |  |  |
| UNC79   |  |  |  |
| UNC80   |  |  |  |
| UPF1    |  |  |  |
| UPP1    |  |  |  |
| UQCC    |  |  |  |
| UQCRC1  |  |  |  |
| UQCRC2  |  |  |  |
| UQCRFS1 |  |  |  |
| UQCRH   |  |  |  |
| URM1    |  |  |  |
| UROD    |  |  |  |
| UROS    |  |  |  |
| USF1    |  |  |  |
| USHBP1  |  |  |  |
| USO1    |  |  |  |
| USP13   |  |  |  |
| USP14   |  |  |  |
| USP19   |  |  |  |
| USP32   |  |  |  |
| USP33   |  |  |  |
| USP37   |  |  |  |
| USP38   |  |  |  |
| USP39   |  |  |  |
| USP42   |  |  |  |
| USP48   |  |  |  |
| USP49   |  |  |  |
| USP5    |  |  |  |
| USP53   |  |  |  |
| UST     |  |  |  |
| UTY     |  |  |  |
| UVRAG   |  |  |  |
| VAMP1   |  |  |  |
| VAMP5   |  |  |  |
| VAMP8   |  |  |  |
| VAPB    |  |  |  |
| VASP    |  |  |  |
| VCPIP1  |  |  |  |
| VDAC1   |  |  |  |
| VDAC1P1 |  |  |  |
| VDAC2   |  |  |  |
| VDAC3   |  |  |  |
| VEGFA   |  |  |  |

|           |  |  |  |
|-----------|--|--|--|
| VGLL4     |  |  |  |
| VHL       |  |  |  |
| VILL      |  |  |  |
| VIM       |  |  |  |
| VIMP      |  |  |  |
| VIP       |  |  |  |
| VIPR1     |  |  |  |
| VNN2      |  |  |  |
| VPS11     |  |  |  |
| VPS16     |  |  |  |
| VPS25     |  |  |  |
| VPS29     |  |  |  |
| VPS33B    |  |  |  |
| VPS35     |  |  |  |
| VPS36     |  |  |  |
| VPS37B    |  |  |  |
| VPS41     |  |  |  |
| VPS45     |  |  |  |
| VPS4B     |  |  |  |
| VPS52     |  |  |  |
| VRK1      |  |  |  |
| VSIG10    |  |  |  |
| VSIG4     |  |  |  |
| VSNL1     |  |  |  |
| VSTM5     |  |  |  |
| VTA1      |  |  |  |
| VWA2      |  |  |  |
| VWA3B     |  |  |  |
| VWC2      |  |  |  |
| WAC-AS1   |  |  |  |
| WARS2     |  |  |  |
| WAS       |  |  |  |
| WASH3P    |  |  |  |
| WBP1L     |  |  |  |
| WBP4      |  |  |  |
| WBP5      |  |  |  |
| WBSCR17   |  |  |  |
| WDFY3-AS2 |  |  |  |
| WDR1      |  |  |  |
| WDR12     |  |  |  |
| WDR17     |  |  |  |
| WDR36     |  |  |  |
| WDR47     |  |  |  |
| WDR49     |  |  |  |



|          |  |  |  |
|----------|--|--|--|
| WDR52    |  |  |  |
| WDR54    |  |  |  |
| WDR62    |  |  |  |
| WDR7     |  |  |  |
| WDR70    |  |  |  |
| WDR73    |  |  |  |
| WDR75    |  |  |  |
| WDR77    |  |  |  |
| WDR78    |  |  |  |
| WDR91    |  |  |  |
| WDR92    |  |  |  |
| WDR96    |  |  |  |
| WDYHV1   |  |  |  |
| WEE1     |  |  |  |
| WEE2-AS1 |  |  |  |
| WFDC1    |  |  |  |
| WFS1     |  |  |  |
| WIBG     |  |  |  |
| WIZ      |  |  |  |
| WLS      |  |  |  |
| WNT7B    |  |  |  |
| WNT9B    |  |  |  |
| WSB1     |  |  |  |
| WSCD1    |  |  |  |
| WWC1     |  |  |  |
| WWTR1    |  |  |  |
| XBP1     |  |  |  |
| XPC      |  |  |  |
| XPO1     |  |  |  |
| XPO6     |  |  |  |
| XPOT     |  |  |  |
| XRCC1    |  |  |  |
| XRCC6    |  |  |  |
| XRN2     |  |  |  |
| YAP1     |  |  |  |
| YBEY     |  |  |  |
| YBX1     |  |  |  |
| YBX1P1   |  |  |  |
| YBX1P10  |  |  |  |
| YBX3     |  |  |  |
| YEATS4   |  |  |  |
| YIPF6    |  |  |  |
| YPEL2    |  |  |  |
| YPEL3    |  |  |  |

|          |  |  |  |
|----------|--|--|--|
| YWHAB    |  |  |  |
| ZBBX     |  |  |  |
| ZBED5    |  |  |  |
| ZBTB1    |  |  |  |
| ZBTB24   |  |  |  |
| ZBTB3    |  |  |  |
| ZBTB33   |  |  |  |
| ZBTB42   |  |  |  |
| ZBTB43   |  |  |  |
| ZC2HC1A  |  |  |  |
| ZC3H12A  |  |  |  |
| ZC3H12C  |  |  |  |
| ZC3H6    |  |  |  |
| ZC3HAV1  |  |  |  |
| ZC4H2    |  |  |  |
| ZCCHC11  |  |  |  |
| ZCCHC2   |  |  |  |
| ZCWPW2   |  |  |  |
| ZDHHC15  |  |  |  |
| ZDHHC17  |  |  |  |
| ZDHHC18  |  |  |  |
| ZEB1     |  |  |  |
| ZEB1-AS1 |  |  |  |
| ZFAND2B  |  |  |  |
| ZFAND3   |  |  |  |
| ZFAND6   |  |  |  |
| ZFAS1    |  |  |  |
| ZFC3H1   |  |  |  |
| ZFP14    |  |  |  |
| ZFP2     |  |  |  |
| ZFP36    |  |  |  |
| ZFP36L1  |  |  |  |
| ZFR      |  |  |  |
| ZFY      |  |  |  |
| ZFYVE16  |  |  |  |
| ZFYVE27  |  |  |  |
| ZFYVE9   |  |  |  |
| ZGLP1    |  |  |  |
| ZIC5     |  |  |  |
| ZMAT2    |  |  |  |
| ZMAT4    |  |  |  |
| ZMPSTE24 |  |  |  |
| ZMYM1    |  |  |  |
| ZMYM2    |  |  |  |

|          |  |  |  |
|----------|--|--|--|
| ZNF114   |  |  |  |
| ZNF117   |  |  |  |
| ZNF133   |  |  |  |
| ZNF14    |  |  |  |
| ZNF143   |  |  |  |
| ZNF157   |  |  |  |
| ZNF175   |  |  |  |
| ZNF18    |  |  |  |
| ZNF180   |  |  |  |
| ZNF217   |  |  |  |
| ZNF248   |  |  |  |
| ZNF25    |  |  |  |
| ZNF251   |  |  |  |
| ZNF254   |  |  |  |
| ZNF271   |  |  |  |
| ZNF28    |  |  |  |
| ZNF287   |  |  |  |
| ZNF316   |  |  |  |
| ZNF329   |  |  |  |
| ZNF33A   |  |  |  |
| ZNF33BP1 |  |  |  |
| ZNF347   |  |  |  |
| ZNF365   |  |  |  |
| ZNF366   |  |  |  |
| ZNF37BP  |  |  |  |
| ZNF385B  |  |  |  |
| ZNF385D  |  |  |  |
| ZNF398   |  |  |  |
| ZNF408   |  |  |  |
| ZNF426   |  |  |  |
| ZNF445   |  |  |  |
| ZNF449   |  |  |  |
| ZNF451   |  |  |  |
| ZNF460   |  |  |  |
| ZNF480   |  |  |  |
| ZNF516   |  |  |  |
| ZNF517   |  |  |  |
| ZNF518B  |  |  |  |
| ZNF536   |  |  |  |
| ZNF540   |  |  |  |
| ZNF554   |  |  |  |
| ZNF555   |  |  |  |
| ZNF568   |  |  |  |
| ZNF579   |  |  |  |

|            |  |  |  |
|------------|--|--|--|
| ZNF586     |  |  |  |
| ZNF589     |  |  |  |
| ZNF607     |  |  |  |
| ZNF658     |  |  |  |
| ZNF674-AS1 |  |  |  |
| ZNF680     |  |  |  |
| ZNF701     |  |  |  |
| ZNF711     |  |  |  |
| ZNF740     |  |  |  |
| ZNF761     |  |  |  |
| ZNF789     |  |  |  |
| ZNF804B    |  |  |  |
| ZNF813     |  |  |  |
| ZNF815P    |  |  |  |
| ZNF826P    |  |  |  |
| ZNF835     |  |  |  |
| ZNF850     |  |  |  |
| ZNF862     |  |  |  |
| ZNRF3      |  |  |  |
| ZRANB1     |  |  |  |
| ZRANB2     |  |  |  |
| ZRANB2-AS2 |  |  |  |
| ZSCAN21    |  |  |  |
| ZSCAN31    |  |  |  |
| ZYG11B     |  |  |  |

**Supplementary Table S6. Previously published BPA transcriptome studies obtained from NCBI GEO DataSets that were used in the data-mining analysis of BPA-responsive genes.**

| <b>Title</b>                                                                                                                                                                    | <b>Author and Year</b> | <b>Sample Size</b> | <b>Sample Type</b>          |
|---------------------------------------------------------------------------------------------------------------------------------------------------------------------------------|------------------------|--------------------|-----------------------------|
| Transcriptomal profiling of C57BL/6 wild type and ER-alpha KO mice fetal mammary glands after fetal exposure to bisphenol A (BPA) and 17alpha-ethynylestradiol (EE2) (GSE44387) | Wadia et al., 2013     | 36 samples         | Mouse mammary gland tissues |
| Toxicogenomic analysis of placenta samples from mice exposed to different doses of BPA (GSE63852)                                                                               | Sabrina et al., 2014   | 11 samples         | Mouse placental tissues     |
| Transgenerational Gene Expression Changes Caused by Exposing Fetal Germ Cells to Endocrine Disruptors (GSE58642)                                                                | Piroska et al., 2015   | 32 samples         | Mouse fetal germ cells      |
| Transcriptome of human osteosarcoma (HOS) cells induced by bisphenol A, S and AF (GSE50527)                                                                                     | Fic et al., 2015       | 24 samples         | HOS cell line               |
| Effects of bisphenol A on gene expression in adipocytes from lean children: Association with metabolic disorders (GSE58516)                                                     | Menale et al., 2015    | 15 samples         | Primary human adipocytes    |
| Preferential epigenetic programming of the estrogen response after in utero xenoestrogen (bisphenol A) exposure (GSE86923)                                                      | Jorgensen et al., 2016 | 10 samples         | Mouse uterine tissues       |

**Supplementary Table S7. The list of differentially expressed genes in response to BPA identified by the reanalysis of previously published transcriptome profiling studies in NCBI GEO DataSets database.**

| <b>GSE44387</b> | <b>GSE63852</b> | <b>GSE58642</b> | <b>GSE50527</b> | <b>GSE58516</b> | <b>GSE86923</b> |
|-----------------|-----------------|-----------------|-----------------|-----------------|-----------------|
| AA407107        | AAAS            | Akr1cl          | AATBC           | AIM2            | AAAS            |
| AACS            | ABCA4           | Cd200r3         | ABCA3           | BRF2            | AAGAB           |
| ABCB9           | ABHD14A         | CLIC3           | ABHD1           | C7orf72         | AARD            |
| ABCC5           | ABL2            | CSGALNACT1      | ABRA            | DHRS1           | AARS            |
| ABHD17A         | ACADM           | DMRTA1          | ABT1            | FAM134C         | AARSD1          |
| ABL1            | ACADSB          | DOK7            | ABTB1           | FAM193B         | AATF            |
| ABTB1           | ACSL6           | FCER2           | ACOXL           | FOXO4           | ABCA7           |
| ACAA1           | ACSS3           | FFAR3           | ACP1            | GOLGA8DP        | ABCB8           |
| ACAA2           | ACTA2           | FRYL            | ACSBG2          | GOLGA8EP        | ABCC10          |
| ACACB           | ADCY5           | Gm10152         | ACSM3           | GOLGA8G         | ABCD3           |
| ACADM           | ADD3            | GPR15           | ACSM5           | HMOX2           | ABCE1           |
| ACADS           | ADH1C           | HS3ST3A1        | ACSS2           | KLHL36          | ABCF2           |
| ACLY            | ADORA2B         | ITGB7           | ADAM28          | LHX6            | ABHD14B         |
| ACOT9           | ADRA1D          | JAK3            | ADAMTS17        | MS4A6A          | ABHD16A         |
| ACSL1           | AFDN            | LGR5            | ADAMTS7P1       | NARFL           | ABHD6           |
| ACVR1           | AGA             | LPL             | ADCY2           | OR1B1           | ACAA2           |
| ADAL            | AGXT2           | mir-23          | ADD3            | OR51I1          | ACAD9           |
| ADAM17          | Aia1            | Olf600          | ADGRE3          | PDDC1           | ACADM           |
| ADAMTS4         | AIFM1           | OR10G2          | ADGRE4P         | PEX26           | ACADVL          |
| ADHFE1          | AKR1D1P1        | PNMT            | ADNP2           | PIGH            | ACER3           |
| ADTRP           | ALCAM           | PPP1R3A         | ADORA1          | PPOX            | ACOX3           |
| AGL             | ALDH18A1        | RNF213          | AFAP1-AS1       | R3HCC1          | ACOXL           |
| AGPAT3          | Aldh5           | Sct             | AFDN-AS1        | RAB9BP1         | ACP2            |
| AI449212        | ALDH5A1         | SEP11           | AGAP1           | RPL13AP17       | ACTA1           |
| Airn            | Aldr5           | SERPINA11       | AGAP3           | RPL29P30        | ACTB            |
| AK1             | ALOX12B         | Serpina3b       | AGK             | RPS10P7         | ACTN4           |
| AKR1A1          | AMT             | Serpina3j       | AGL             | SIDT1           | ACTR2           |
| ALAS1           | APBB3           | SH3YL1          | AHCTF1          | SLAMF1          | ACY1            |
| ALDH16A1        | APOC4           | SP6             | AHNAK2          | SLC25A39        | ADA             |
| ALDOA           | AQP7            | SPOCK3          | AIM1L           | SNHG16          | Adam26a         |
| ALG8            | ARFGAP3         | TMEM82          | AJAP1           | SPATA16         | Adam26b         |
| ANAPC5          | ARHGAP5         | TSSK1B          | AKAP1           | STARD7-AS1      | ADAMTSL3        |
| ANKRD13D        | ARID3A          | Ube2d4          | AKIRIN2         | STRADA          | ADAMTSL5        |
| ANKRD17         | ARL6IP1         | UMODL1          | AKR1C4          | SYTL4           | ADD1            |
| ANKRD63         | ASB9            | ZAR1            | AKR7L           | TAS2R41         | ADGRG2          |
| Anp32a          | ASCC3           |                 | ALAD            | TLR10           | Adh6a           |
| ANXA8           | ASGR1           |                 | ALDH1A2         | TMEM185A        | ADK             |
| ANXA8L1         | ASL             |                 | ALG12           | ZNF212          | ADM             |
| Ap2b1           | ASS1P5          |                 | ALKBH6          | ZNF346          | ADORA3          |

|               |          |  |             |         |          |
|---------------|----------|--|-------------|---------|----------|
| AP3M2         | ASTL     |  | ALOXE3      | ZNF350  | ADPRH    |
| APCDD1        | ATF1     |  | AMN         | ZNF419  | ADRB2    |
| APMAP         | ATF6B    |  | ANKH        | ZNF821  | ADSSL1   |
| APOE          | ATP2B3   |  | ANKRD20A11F | ZSCAN25 | AGFG2    |
| APOO          | ATRN     |  | ANKRD20A8P  |         | AGGF1    |
| APOPT1        | ATXN2    |  | ANKRD30A    |         | AGO2     |
| ARAP1         | AVPR1A   |  | ANKRD37     |         | AGPAT2   |
| ARAP2         | B4GAT1   |  | ANXA8       |         | AGTR1    |
| ARHGEF25      | BAG4     |  | ANXA8L1     |         | AHCTF1   |
| ARID5B        | BAIAP3   |  | APLP1       |         | AHCYL2   |
| ARIH2         | BBOX1    |  | APOB        |         | AHI1     |
| ARL13B        | BHLHA15  |  | APOL4       |         | AHNAK2   |
| ARL4A         | BLMH     |  | APOOL       |         | AHSA1    |
| ARNT          | BMP3     |  | ARF3        |         | AI413582 |
| ARPC3         | BMPR1B   |  | ARHGAP11B   |         | AIDA     |
| ARSG          | Bmyc     |  | ARHGAP25    |         | AIF1     |
| ARX           | BNIP3L   |  | ARHGAP8     |         | AIF1L    |
| ASL           | BUB1B    |  | ARL2BP      |         | AIM1L    |
| ASPA          | BUD31    |  | ARMC10P1    |         | AIP      |
| ASTN1         | C19orf53 |  | ARMC6       |         | AKAP1    |
| ATG101        | C1QBP    |  | ARRDC2      |         | AKAP8    |
| ATG9A         | C21orf2  |  | ART4        |         | Akap9    |
| ATL3          | CACFD1   |  | ASB11       |         | AKR1A1   |
| ATP5J2-PTCD1  | CAD      |  | ASB12       |         | AKR1B1   |
| ATP6V0A1      | CALB1    |  | ASB16       |         | Akr1c12  |
| ATXN2         | CALR     |  | ASH1L-AS1   |         | Akr1c13  |
| B230214N19Rik | CANX     |  | ASTN2-AS1   |         | AKR1C3   |
| B230307C23Rik | CAPSL    |  | ATAD1       |         | AKT3     |
| B330016D10Rik | CCDC43   |  | ATF4P4      |         | ALCAM    |
| BAD           | CD34     |  | ATL1        |         | ALG5     |
| BAIAP2        | CD40LG   |  | ATP1A4      |         | ALKBH6   |
| BARD1         | CD7      |  | ATP2A2      |         | ALKBH7   |
| BC026513      | CDC42EP3 |  | ATP5F1      |         | ALKBH8   |
| BCL2L2        | CDH15    |  | ATP6V0D1    |         | Alox12e  |
| BCL6          | CDK20    |  | ATP6V1E1    |         | ALOX5    |
| BCL9L         | CDK6     |  | ATP6V1G3    |         | Alyref   |
| BFAR          | CDK8     |  | AUP1        |         | AMBRA1   |
| BIRC6         | CDS2     |  | AXDND1      |         | AMD1     |
| BORCS8        | CECR7    |  | AZGP1P1     |         | AMDHD2   |
| BPGM          | CLSTN2   |  | B4GALNT3    |         | AMOTL1   |
| BPNT1         | CLTA     |  | B4GAT1      |         | ANAPC5   |
| BRF1          | CLTC     |  | BAAT        |         | ANG      |
| BTNL9         | CMTR1    |  | BAGE5       |         | ANKH     |
| BZW2          | CNEP1R1  |  | BCL2        |         | ANKHD1   |

|               |          |  |             |                |
|---------------|----------|--|-------------|----------------|
| C030011I16Rik | CNGA3    |  | BCL2L13     | ANKHD1-EIF4EBF |
| C10orf11      | CNPY2    |  | BCL3        | ANKMY2         |
| C11orf54      | COCH     |  | BCLAF1      | ANKRD11        |
| C130075A20Rik | COL5A2   |  | BCOR        | ANKRD22        |
| C18orf8       | CPNE6    |  | BCR         | ANKS6          |
| C19orf44      | CREB5    |  | BDNF-AS     | Anp32b-ps1     |
| C19orf53      | CRHBP    |  | BEND6       | ANTXR2         |
| C19orf70      | Crisp3   |  | BEX2        | ANXA4          |
| C1D           | Crisp1   |  | BEX4        | ANXA7          |
| C1orf123      | CRX      |  | BICDL2      | AOC1           |
| C22orf23      | CSF2RA   |  | BIN3        | AP1S1          |
| C2orf68       | CTNBL1   |  | BMF         | AP4M1          |
| C3orf14       | DCTN1    |  | BMP1        | AP5B1          |
| C430003N24Rik | DDX21    |  | BOD1        | APBB1IP        |
| C5orf30       | DDX6     |  | BRD7        | APEH           |
| C5orf63       | Defa11   |  | BTBD8       | APOBEC1        |
| C77438        | Defa6    |  | BZW1P2      | APOBR          |
| C9orf85       | Defa-rs9 |  | C10orf107   | APOL6          |
| CA11          | DENR     |  | C10orf53    | APOPT1         |
| CA5B          | DIAPH1   |  | C11orf65    | APPL1          |
| CASKIN2       | DMP1     |  | C11orf70    | AQP9           |
| CASP3         | DNAJA1   |  | C11orf95    | AQR            |
| CCDC107       | DPCD     |  | C12orf57    | ARF3           |
| CCDC167       | EDF1     |  | C12orf77    | ARF5           |
| CCDC47        | EIF2A    |  | C14orf132   | ARFGEF3        |
| CCDC81        | EIF2B3   |  | C16orf52    | ARFIP2         |
| CCDC9         | EIF2S1   |  | C16orf54    | ARG1           |
| CCND2         | EIF3M    |  | C18orf25    | ARHGAP15       |
| CCNJ          | EIF5     |  | C1orf147    | ARHGAP30       |
| Cd59a         | EIF6     |  | C1orf43     | ARHGAP45       |
| CD93          | ELAVL3   |  | C1orf53     | ARHGAP6        |
| CDC37         | EPC1     |  | C1QTNF1     | ARHGDIB        |
| CDC42BPG      | ERBB4    |  | C1R         | ARHGEF6        |
| CDHR4         | ERCC4    |  | C2orf70     | ARID1B         |
| CDIP1         | ETHE1    |  | C2orf81     | ARID2          |
| CDK5RAP2      | EXO1     |  | C3          | ARL11          |
| CDKL3         | EXOSC2   |  | C3orf35     | ARL4C          |
| CDKN1A        | EYA3     |  | C4orf3      | ARL6IP1        |
| CDS2          | FAM20B   |  | C6orf48     | ARMC6          |
| CEP55         | FASLG    |  | C8orf76     | ARMCX3         |
| CEP68         | FBXL12   |  | C9orf50     | ARPC3          |
| CES1          | FDFT1    |  | CA8         | ARPC5          |
| CFLAR         | FER      |  | CACNA1C-AS4 | ARRDC1         |
| CFP           | FGFR2    |  | CACNA1G     | ARSA           |



|               |             |  |          |  |          |
|---------------|-------------|--|----------|--|----------|
| CHID1         | FH          |  | CACNG2   |  | ARSG     |
| CHPF          | FLT4        |  | CACNG6   |  | ARV1     |
| CHPT1         | FLVCR1      |  | CACTIN   |  | ASB1     |
| CHRD1         | FOXN1       |  | CACYBPP2 |  | ASB6     |
| CHRNA4        | FTSJ1       |  | CAMK1G   |  | ASCC3    |
| CHST4         | G3BP2       |  | CAMK2B   |  | ASH1L    |
| CIAO1         | G6PD        |  | CAMKV    |  | ASNS     |
| CIC           | GALR3       |  | CAP2     |  | ASPH     |
| CLEC16A       | GATA2       |  | CAPN7    |  | ASXL1    |
| CLEC6A        | GGCT        |  | CAPNS2   |  | ATF4     |
| CLSPN         | GGPS1       |  | CAPZB    |  | ATF5     |
| CMIP          | GGT5        |  | CARHSP1  |  | ATG2B    |
| CMPK2         | GIF         |  | CASC10   |  | ATG9B    |
| CMTM7         | Glud-ps     |  | CASK     |  | ATIC     |
| COA7          | Glycam1     |  | CAT      |  | ATL3     |
| COG2          | GNAQ        |  | CATSPER2 |  | ATOX1    |
| COG6          | GOT1        |  | CBLN3    |  | ATP13A1  |
| COPE          | GPC1        |  | CBX7     |  | ATP2A1   |
| CPTP          | GPD1        |  | CCDC103  |  | ATP2A3   |
| CRIM1         | GPR19       |  | CCDC113  |  | ATP2B2   |
| CRLS1         | GRP         |  | CCDC114  |  | ATP5F1   |
| CRTC1         | GSTT1       |  | CCDC115  |  | ATP6AP1  |
| CSAD          | GTF2A1      |  | CCDC153  |  | ATP6AP2  |
| CSDE1         | GUCA2B      |  | CCDC167  |  | ATP6V1B2 |
| CSF2RB        | H32         |  | CCDC191  |  | ATP6V1C1 |
| CSPG4         | HEXIM1      |  | CCDC78   |  | ATP6V1D  |
| CSTF1         | HIPK2       |  | CCDC85A  |  | ATP6V1E1 |
| CSTF2T        | HNRNPA3P1   |  | CCER2    |  | ATXN1    |
| CTBS          | HNRNPC      |  | CCL14    |  | ATXN1L   |
| CTSB          | Hom1        |  | CCL2     |  | ATXN3    |
| CTSD          | HOMER3      |  | CCL25    |  | AUH      |
| CTSZ          | HOXB8       |  | CCR1     |  | AVEN     |
| CUEDC1        | HSPA9       |  | CCR2     |  | AVL9     |
| CWC15         | HUS1        |  | CCT2     |  | B2M      |
| CWF19L2       | Hya         |  | CCT8L2   |  | B3GALNT1 |
| CX3CL1        | IDH3G       |  | CCZ1     |  | B3GALNT2 |
| CYB5B         | IFIT3       |  | CCZ1B    |  | B4GALT3  |
| CYHR1         | IFITM3      |  | CD1D     |  | BABAM1   |
| CYP1B1        | IGHV1-69    |  | CD207    |  | BACE1    |
| CYP2J2        | IGHV3-33-2  |  | CD28     |  | BAG4     |
| CYSRT1        | IGHV3OR16-7 |  | CD79B    |  | BAIAP3   |
| D630033A02Rik | IGKV1-5     |  | CD99L2   |  | BAP1     |
| D630045M09Rik | IGKV2D-23   |  | CDC25B   |  | BBS7     |
| DAPP1         | IGLV1-36    |  | CDC25C   |  | BC085271 |

|         |          |  |          |  |          |
|---------|----------|--|----------|--|----------|
| DAXX    | IL17C    |  | CDC37P1  |  | BCAP29   |
| DCAF5   | IL17RA   |  | CDC42BPB |  | BCCIP    |
| DCAF7   | IL1RAPL1 |  | CDC6     |  | BCKDHB   |
| DCTN2   | IL27RA   |  | CDK15    |  | BCL2L11  |
| DCTN3   | ING4     |  | CDK5R1   |  | BCL2L13  |
| DDHD1   | INHBA    |  | CDK7     |  | BCL2L15  |
| DDX27   | INHBB    |  | CDKL2    |  | BCL6     |
| DDX41   | Ins1     |  | CDV3     |  | BCS1L    |
| DDX46   | IVD      |  | CEACAM21 |  | BEX3     |
| DDX60   | Kap      |  | CEACAM3  |  | BEX4     |
| DECR1   | KBTBD2   |  | CELF1    |  | BHLHA15  |
| DEDD    | KCNA2    |  | CERS2    |  | BLCAP    |
| DENND2A | KCNN3    |  | CERS6    |  | BMP1     |
| DENND2D | KCNQ4    |  | CFAP97   |  | BMS1     |
| DERL1   | KDM5D    |  | CFH      |  | Bmyc     |
| DGAT1   | KHNYN    |  | CGB1     |  | BNC2     |
| DHDH    | KLF6     |  | CGB2     |  | BOD1L1   |
| DHRS7   | KLHL21   |  | CHCHD10  |  | BPNT1    |
| DHX30   | LIPT2    |  | CHD3     |  | Brip1os  |
| DHX36   | LMO7     |  | CHD7     |  | BRSK1    |
| DISP1   | LMX1B    |  | CHKA     |  | BTAFF1   |
| DLAT    | LSM5     |  | CHM      |  | BTBD3    |
| DMTF1   | LUM      |  | CHN1     |  | BTD      |
| DNAAF1  | MAGEA1   |  | CHORDC1  |  | BTK      |
| DNAJA3  | MAP1B    |  | CHRM2    |  | BTRC     |
| DNAJC17 | MAP3K4   |  | CHST4    |  | BZW2     |
| DNASE2  | MAX      |  | CHST9    |  | C11orf98 |
| DNM2    | MBD2     |  | CIDEC    |  | C12orf10 |
| DPH1    | MIPEP    |  | CLDN25   |  | C12orf49 |
| DR1     | MITF     |  | CLINT1   |  | C14orf1  |
| DSTYK   | MLLT11   |  | CNBD1    |  | C16orf72 |
| DTX4    | MMEL1    |  | CNN2     |  | C18orf8  |
| DUS1L   | MOGS     |  | CNNM2    |  | C19orf53 |
| DUSP28  | MPV17L2  |  | CNTN4    |  | C1orf159 |
| DYRK2   | MRPL3    |  | COA3     |  | C1orf174 |
| EAPP    | MRPL38   |  | COBLL1   |  | C1orf198 |
| EBPL    | MSL3     |  | COL5A1   |  | C1orf54  |
| ECHDC2  | MSX2     |  | COL9A1   |  | C1QB     |
| ECI1    | MT-CYB   |  | COLQ     |  | C1QC     |
| ECSIT   | MTMR2    |  | COMMD7   |  | C1QTNF3  |
| EDNRA   | MTR      |  | COX7A1   |  | C1QTNF5  |
| EEF2K   | MUC3A    |  | COX8A    |  | C20orf24 |
| EGLN2   | MVK      |  | CPNE7    |  | C21orf33 |
| Ehbp111 | MYLIP    |  | CRAMP1   |  | C2CD3    |

|          |           |  |               |  |              |
|----------|-----------|--|---------------|--|--------------|
| EHD2     | MYO9B     |  | CROT          |  | C2CD4A       |
| EIF4A3   | NBR1      |  | CRYGN         |  | C3           |
| EIF4EBP2 | NEURL1B   |  | CSE1L         |  | C3orf14      |
| EIF4G1   | NF1       |  | CSF3          |  | C4bp         |
| EMC4     | NFKBIB    |  | CSTF1         |  | C5orf22      |
| EMC9     | NIT1      |  | CSTF3         |  | C5orf24      |
| EPB41L2  | Nmyc2     |  | CT55          |  | C5orf51      |
| ETF1     | Nova2-rs2 |  | CTAG1A        |  | C6orf120     |
| ETFA     | NQO1      |  | CTAG1B        |  | C6orf62      |
| ETFB     | NUBP1     |  | CTDSPL2       |  | C8orf44-SGK3 |
| ETNK1    | NUP85     |  | CTRB1         |  | C9orf85      |
| ETS2     | OASL      |  | CUX1          |  | CA10         |
| EXOSC10  | OCIAD1    |  | CWH43         |  | CA13         |
| EZH1     | OPA3      |  | CXCL1         |  | CACNA1A      |
| FADS1    | OPRK1     |  | CXCL17        |  | CACNA1G      |
| FAM105A  | OR2A7     |  | CXCL2         |  | CACNB2       |
| FAM114A2 | OR2A4     |  | CXCL8         |  | CACNB3       |
| FAM126B  | OTX1      |  | CYP2T1P       |  | CACTIN       |
| FAM131A  | PAN2      |  | CYP3A7        |  | CACYBP       |
| FAM149B1 | PCMT1     |  | CYP7A1        |  | CADPS2       |
| FAM168A  | Pcnt      |  | CYTH1         |  | CALCOCO1     |
| FAM193A  | PDE3B     |  | DACT1         |  | Cald1        |
| FAM219A  | PDE7B     |  | DAZ1          |  | CALU         |
| FAM50A   | PDLIM5    |  | DAZ4          |  | CAMKK2       |
| FAM63A   | PEPD      |  | DBIL5P        |  | CAPZB        |
| FAM71B   | PFDN4     |  | DCAF12L1      |  | CARHSP1      |
| FARSA    | PHKA2     |  | DCDC5         |  | CASK         |
| FASTK    | PHYH      |  | DCT           |  | CASKIN1      |
| FBXL14   | PIAS1     |  | DCUN1D5       |  | CAT          |
| FBXL7    | PIN1      |  | DDN           |  | CAV1         |
| FBXW5    | PIP5K1C   |  | DEFA1         |  | CBFA2T3      |
| FERMT2   | PLA2R1    |  | DEFB121       |  | CBLN2        |
| FEZF1    | PLEC      |  | DEGS1         |  | CBX3         |
| FGF14    | PLK2      |  | DEXI          |  | CCDC106      |
| FICD     | Plk-ps1   |  | DGAT1         |  | CCDC137      |
| FKBP11   | PLS1      |  | DHX35         |  | CCDC186      |
| FKBP15   | PLTP      |  | DIO1          |  | CCDC3        |
| FLAD1    | PLXNA3    |  | DIRAS2        |  | CCDC59       |
| FLII     | PNOC      |  | DISP1         |  | CCDC6        |
| FN3KRP   | POLA2     |  | DKFZp686K1684 |  | Ccl6         |
| FNBP1    | POM121L9P |  | DKK1          |  | Ccl7         |
| FNBP4    | POU3F3    |  | DKK2          |  | Ccl8         |
| FNDC5    | PPEF2     |  | DLGAP1-AS1    |  | CCND1        |
| FNIP1    | PPM1E     |  | DLL3          |  | CCND2        |

|         |          |  |            |  |          |
|---------|----------|--|------------|--|----------|
| FOXM1   | PRKAG1   |  | DMD        |  | CCNH     |
| FUOM    | PRKCI    |  | DMP1       |  | CCNL1    |
| FZD1    | PRKDC    |  | DNAAF5     |  | CCPG1    |
| G6pd2   | PRPF18   |  | DNAH12     |  | CD177    |
| GABRB2  | PSMA3    |  | DNAJA3     |  | CD180    |
| GAD2    | PSMB6    |  | DNAJC5B    |  | Cd209f   |
| GALM    | PSPN     |  | DNASE2B    |  | Cd33     |
| GALNT2  | PTGER1   |  | DNHD1      |  | CD47     |
| GATB    | PTPN7    |  | DOCK2      |  | Cd52     |
| GCN1    | RAD17    |  | DOCK9-AS2  |  | CD84     |
| GFI1    | RALGAPB  |  | DPCD       |  | CD86     |
| GFPT1   | RALGDS   |  | DPM1       |  | CDC23    |
| GHITM   | RAX      |  | DPM3       |  | CDC25B   |
| GHR     | RFXANK   |  | DPPA2P3    |  | CDC42SE1 |
| GLT8D2  | RGN      |  | E2F1       |  | CDC5L    |
| GLTSCR1 | RNF41    |  | EBI3       |  | CDCP1    |
| GLTSCR2 | RPL13    |  | ECD        |  | CDH3     |
| GLUD1   | RPL22    |  | ECH1       |  | CDK2     |
| Gm10010 | RPN1     |  | EFEMP1     |  | CDK2AP2  |
| Gm12503 | RPS15A   |  | EFL1       |  | CDK4     |
| Gm15821 | RRH      |  | EGLN2      |  | CDK5RAP1 |
| Gm16845 | S100A3   |  | EHD2       |  | CDT1     |
| Gm31765 | SCP2     |  | EIF1AX     |  | CEBPE    |
| Gm33002 | SCTR     |  | EIF3CL     |  | CELF2    |
| Gm38785 | SDCBP    |  | EIF3M      |  | CENPB    |
| Gm41105 | SERPINI1 |  | EIF4E      |  | CEP295   |
| Gm41441 | SLC10A1  |  | EIF4ENIF1  |  | CES1     |
| Gm42151 | SLC11A2  |  | ELAVL2     |  | CFB      |
| GNA12   | SLC12A4  |  | ELF1       |  | CFI      |
| GOLGA3  | SLC13A2  |  | ELK4       |  | CFP      |
| GON4L   | SLC16A4  |  | ELMO1      |  | CHCHD6   |
| GPD2    | SLC25A30 |  | ELOCP3     |  | CHD2     |
| GPN1    | SLC35B2  |  | EMC3       |  | CHD6     |
| GPN2    | SLCO3A1  |  | EMC6       |  | CHD7     |
| GPR146  | SLIT1    |  | EN2        |  | CHD9     |
| GPRC5B  | SLN      |  | ENPP1      |  | CHFR     |
| GPRIN3  | SMAD4    |  | ENTPD1-AS1 |  | CHI3L1   |
| GPT2    | SMTN     |  | EP400NL    |  | CHKA     |
| GRAMD1B | SMYD3    |  | EPB41L4B   |  | CHMP2A   |
| GRB10   | SORD     |  | EPC2       |  | CHST15   |
| GSN     | SOX21    |  | EPSTI1     |  | Chtop    |
| GSS     | SPO11    |  | EPX        |  | CISD1    |
| GSTT2   | SPP1     |  | ERC1       |  | CKB      |
| GSTT2B  | SRD5A1   |  | ERCC4      |  | CLCA1    |

|         |             |  |          |  |          |
|---------|-------------|--|----------|--|----------|
| GTF2H5  | STAT4       |  | ERICH2   |  | Clca3b   |
| GTF3A   | STX6        |  | ERLEC1   |  | CLDN10   |
| GZF1    | STXBP1      |  | ESP33    |  | CLDN12   |
| H2AFJ   | SUCLG1      |  | ESR2     |  | CLDN15   |
| H2afy3  | SULT1C4     |  | ETFB     |  | CLDN2    |
| H2-T22  | SUN2        |  | EVPLL    |  | CLDN4    |
| HADHB   | SYN1        |  | EXD3     |  | Clec2d   |
| HAUS1   | TAZ         |  | EXOSC1   |  | Clec4a3  |
| HAUS7   | TBC1D9B     |  | EYA2     |  | CLEC7A   |
| HCAR1   | TBCB        |  | FAAH2    |  | CLIP1    |
| HDAC4   | Tcp1-ps1    |  | FAIM     |  | CLN3     |
| HEATR6  | TCTE1       |  | FAM106A  |  | CLPP     |
| HGS     | TEKT1       |  | FAM110B  |  | CLTC     |
| HIBCH   | TIMM13      |  | FAM120B  |  | CLUAP1   |
| HINT2   | TIMM9       |  | FAM127A  |  | CLUH     |
| HIP1    | TLR4        |  | FAM127B  |  | CMA1     |
| HIPK1   | TMSB4XP8    |  | FAM138A  |  | CMPK1    |
| HLA-A   | TOP3B       |  | FAM151A  |  | CMSS1    |
| HMG20A  | TPI1        |  | FAM168A  |  | CMTR2    |
| HOXB3   | TPK1        |  | FAM182B  |  | CNDP1    |
| HOXB4   | TRAJ33      |  | FAM189A1 |  | CNN2     |
| HSD17B4 | TRAV2       |  | FAM221A  |  | CNOT4    |
| HSD17B8 | TRB         |  | FAM27E5  |  | CNOT6L   |
| HSPA4L  | TRBJ2-2     |  | FAM41C   |  | CNST     |
| HSPBP1  | TRBV20OR9-2 |  | FAM69B   |  | CNTN2    |
| ICOS    | TRDD3       |  | FAM69C   |  | CNTN4    |
| IDUA    | TRGV10      |  | FAM74A1  |  | Coa6     |
| Ifi47   | TRIM27      |  | FAM86B3P |  | COASY    |
| IFIT2   | TRIM35      |  | FAM90A26 |  | COG3     |
| IFT81   | TRPC7       |  | FAP      |  | COL4A3BP |
| IGF2BP3 | TSSK1B      |  | FASTK    |  | COL6A2   |
| Igtp    | TTC3        |  | FAT1     |  | COMMD3   |
| ILVBL   | TUBB1       |  | FAT4     |  | COPA     |
| INO80   | TUBG1       |  | FBXL16   |  | COPE     |
| INTS8   | TXN2        |  | FBXO7    |  | COPS7B   |
| INTU    | U2SURP      |  | FDX1     |  | COPS8    |
| Irs3    | UBE2G2      |  | FERMT2   |  | COPZ2    |
| ITCH    | UBE2R2      |  | FES      |  | COQ6     |
| ITGA5   | UBR2        |  | FEZF1    |  | CORO1A   |
| ITGB3   | UCN         |  | FGF2     |  | CORO1C   |
| ITM2C   | UCP2        |  | FGF7P5   |  | COX18    |
| JMJD8   | UGT2A3      |  | FKBP1C   |  | COX7A2   |
| KAT14   | Usf1-rs3    |  | FKBP3    |  | CP       |
| KAT2B   | USP9X       |  | FLT4     |  | CPA3     |

|              |         |  |          |  |               |
|--------------|---------|--|----------|--|---------------|
| KAZN         | VCX3A   |  | FNDC4    |  | CPE           |
| KBTBD11      | VCX     |  | FOLR1    |  | CPEB3         |
| KCNB1        | VDAC1P5 |  | FRG1BP   |  | CPNE4         |
| KCNJ3        | VIP     |  | FRG2     |  | CPSF6         |
| KCNK3        | VIPR2   |  | FRG2B    |  | CPT2          |
| KDM4B        | VNN1    |  | FRMD4B   |  | CPXM1         |
| KDM5C        | WDR1    |  | FSD2     |  | CREB3L2       |
| KDSR         | WDR62   |  | FUOM     |  | CREB5         |
| KHDRBS2      | WNT5B   |  | FUT9     |  | CRELD1        |
| KIAA0100     | WTAP    |  | FXR1     |  | CRELD2        |
| KIAA1468     | XPA     |  | GABPAP   |  | CRLS1         |
| KIF13B       | ZBTB8OS |  | GABPB1   |  | CRNN          |
| KIF1B        | ZFP36L1 |  | GABRA2   |  | CRTC1         |
| KLC2         | ZNF214  |  | GABRG2   |  | CSE1L         |
| KLC4         | ZNF235  |  | GAK      |  | CSF1R         |
| Klf16        | ZNF337  |  | GAS1     |  | CSNK1G2       |
| KLF6         | ZNF608  |  | GAS6-AS1 |  | Csprs         |
| KLHL25       | ZNF79   |  | GBP2     |  | CSRP1         |
| KMT5B        | ZRSR1   |  | GC       |  | CSTF1         |
| KSR1         |         |  | GEM      |  | CTBP2         |
| L3MBTL3      |         |  | GEMIN7   |  | CTGF          |
| LACTB        |         |  | GFRA4    |  | CTNS          |
| LAMB1        |         |  | GGA2     |  | CTPS2         |
| LAMC1        |         |  | GHRL     |  | CTSA          |
| LAMP1        |         |  | GIPC2    |  | CTSE          |
| LDLR         |         |  | GJB3     |  | CTSV          |
| LDLRAP1      |         |  | GJB7     |  | CUL1          |
| LEP          |         |  | GLMN     |  | CUL3          |
| LMNA         |         |  | GLRX2    |  | Cux1          |
| LMNB2        |         |  | GLRXP3   |  | CXADR         |
| LOC102632594 |         |  | GLT8D1   |  | CXCL17        |
| LOC545966    |         |  | GMNN     |  | CYB561D1      |
| LONP2        |         |  | GNB1L    |  | Cyb5r3        |
| LRRC18       |         |  | GNG10    |  | CYCS          |
| LRRC24       |         |  | GNG11    |  | CYHR1         |
| LRRN1        |         |  | GOLGA2P5 |  | CYP2S1        |
| LSM6         |         |  | GOLGA6L2 |  | CYP39A1       |
| LTBP3        |         |  | GOLGA7B  |  | CYP3A7        |
| LYSMD3       |         |  | GOLGA8DP |  | Cyp4f16       |
| MALAT1       |         |  | GOLGA8F  |  | CYP4F2        |
| MAP2K5       |         |  | GPAT2    |  | Cyp4f37       |
| MAP3K10      |         |  | GPC6     |  | CYR61         |
| MAP3K2       |         |  | GPM6B    |  | D030028A08Rik |
| MAPK14       |         |  | GPR1     |  | D130020L05Rik |

|        |  |  |           |  |             |
|--------|--|--|-----------|--|-------------|
| MAPK9  |  |  | GPR108    |  | D17H6S56E-5 |
| MARCH2 |  |  | GPR173    |  | D2Bwg1423e  |
| MARCO  |  |  | GPR183    |  | DAB2IP      |
| MARS   |  |  | GPR39     |  | DAG1        |
| MASTL  |  |  | GPR45     |  | DAO         |
| MCAM   |  |  | GPR50-AS1 |  | DAPK3       |
| MCCC2  |  |  | GPR88     |  | Dazap1      |
| MCEE   |  |  | GPRC5C    |  | DAZAP2      |
| MCUR1  |  |  | GRAP      |  | DCAF6       |
| MDH1   |  |  | GRHPR     |  | DCAKD       |
| MDH2   |  |  | GRIK1     |  | DCP1A       |
| MDN1   |  |  | GRIN2A    |  | DCTN4       |
| MDP1   |  |  | GRK6      |  | DCTN6       |
| MECP2  |  |  | GSAP      |  | DCTPP1      |
| MECR   |  |  | GSTA7P    |  | DDB2        |
| MED22  |  |  | GSTTP2    |  | DDIT3       |
| Meg3   |  |  | GTF2H1    |  | DDR1        |
| MEGF9  |  |  | GTF2IP1   |  | DDX24       |
| METAP1 |  |  | GTPBP10   |  | DDX39B      |
| METTL4 |  |  | GULP1     |  | DDX41       |
| MFN1   |  |  | GUSBP2    |  | DDX49       |
| MFSD12 |  |  | GXYLT1P6  |  | DDX6        |
| MFSD4B |  |  | GZMH      |  | DEK         |
| MGRN1  |  |  | H1FNT     |  | DENND3      |
| Mirt1  |  |  | H3F3AP5   |  | DEPTOR      |
| MKLN1  |  |  | HAO2      |  | DERL2       |
| MKRN2  |  |  | HCFC1R1   |  | DGAT2       |
| MKS1   |  |  | HCG27     |  | DGKG        |
| MLX    |  |  | HCG4      |  | DGKZ        |
| MNS1   |  |  | HDAC7     |  | DHPS        |
| MPDU1  |  |  | HEATR3    |  | DHX15       |
| MRI1   |  |  | HGH1      |  | DHX16       |
| MRPL2  |  |  | HIC2      |  | DHX37       |
| MRPL20 |  |  | HIRA      |  | DLEU7       |
| MRPL27 |  |  | HIVEP2    |  | DLGAP4      |
| MRPL45 |  |  | HK1       |  | DLX2        |
| MRPS14 |  |  | HLA-A     |  | DMAP1       |
| MRPS15 |  |  | HLA-DQB1  |  | DMBT1       |
| MRPS16 |  |  | HLA-G     |  | DNAJB4      |
| MRPS5  |  |  | HMG20B    |  | DNAJB6      |
| MSRB3  |  |  | HMGN2P18  |  | DNAJC1      |
| MTMR9  |  |  | HNF1A     |  | DNAJC12     |
| MVP    |  |  | HNRNPA0   |  | DNAJC13     |
| MXD4   |  |  | HNRNPH1   |  | DNAJC24     |

|         |  |  |          |  |               |
|---------|--|--|----------|--|---------------|
| MYCBP2  |  |  | HOXA10   |  | DNAJC3        |
| MYL6    |  |  | HOXB3    |  | DNASE1L2      |
| MYLIP   |  |  | HPN      |  | DOCK4         |
| MYNN    |  |  | HPS3     |  | DOK3          |
| MYO19   |  |  | HRK      |  | DOT1L         |
| MYOD1   |  |  | HSBP1L1  |  | DPF1          |
| MYSM1   |  |  | HSD11B1  |  | DPT           |
| N4BP2L2 |  |  | HSF2BP   |  | DPY30         |
| NAA25   |  |  | HSPA7    |  | DPYSL2        |
| NAA30   |  |  | HSPB2    |  | DRAM2         |
| NADK2   |  |  | HSPB6    |  | Dst           |
| NAGK    |  |  | HSPH1    |  | DTYMK         |
| NAP1L4  |  |  | HTR2A    |  | DUSP13        |
| NAPRT   |  |  | IDO1     |  | Dync1i2       |
| NAT2    |  |  | IDS      |  | DYNLL1        |
| NAT8L   |  |  | IFNL1    |  | E030030I06Rik |
| NCF1    |  |  | IGDCC3   |  | E2F3          |
| NCOA4   |  |  | IGFBP2   |  | ECD           |
| NCOR1   |  |  | IGHV5-78 |  | ECE1          |
| NDRG2   |  |  | IL10RB   |  | ECI1          |
| NDUFA1  |  |  | IL12A    |  | EDN1          |
| NDUFA4  |  |  | IL12RB2  |  | EDNRB         |
| NDUFA9  |  |  | IL1RL1   |  | EDRF1         |
| NDUFAF8 |  |  | IL23A    |  | EED           |
| NDUFB11 |  |  | IL2RA    |  | EEF1D         |
| NDUFB9  |  |  | IL32     |  | EFNA4         |
| Neat1   |  |  | IL36RN   |  | EGFR          |
| NEDD8   |  |  | ILDR2    |  | EGLN3         |
| NEK8    |  |  | ILK      |  | EGR1          |
| NFIA    |  |  | IMMP1L   |  | EGR3          |
| NFIC    |  |  | INHBA    |  | Eif1          |
| NFKBIA  |  |  | INPP5J   |  | EIF1B         |
| NHEJ1   |  |  | IPO5     |  | EIF3B         |
| NKTR    |  |  | IQCF1    |  | EIF3C         |
| NOA1    |  |  | IRAK3    |  | EIF3D         |
| NOL3    |  |  | IRS4     |  | EIF3I         |
| Nos1ap  |  |  | IRX2     |  | EIF3K         |
| NPC2    |  |  | ISM2     |  | EIF3L         |
| NR1H3   |  |  | ISOC2    |  | EIF4A1        |
| NR3C1   |  |  | ITGA11   |  | EIF4A2        |
| NRM     |  |  | ITGB1    |  | EIF4A3        |
| NRXN1   |  |  | ITIH6    |  | EIF4G1        |
| NSD3    |  |  | IZUMO1R  |  | EIF5          |
| NSRP1   |  |  | KAT14    |  | EIF5A         |



|         |  |  |            |  |          |
|---------|--|--|------------|--|----------|
| NUDT13  |  |  | KCNAB1     |  | ELAC2    |
| NUP155  |  |  | KCNJ12     |  | ELAVL1   |
| OARD1   |  |  | KCNQ4      |  | ELMO2    |
| OAZ2    |  |  | KCNT2      |  | Elob     |
| OGFOD2  |  |  | KCP        |  | ELOVL5   |
| OLR1    |  |  | KCTD14     |  | EMC1     |
| ONECUT2 |  |  | KCTD20     |  | EMD      |
| OPHN1   |  |  | KCTD9P6    |  | EMG1     |
| OR51B4  |  |  | KDELR1     |  | EMILIN1  |
| OSBPL1A |  |  | KDF1       |  | ENG      |
| OSMR    |  |  | KDM4B      |  | ENTPD5   |
| OSTC    |  |  | KIAA1024L  |  | EPHB2    |
| OTULIN  |  |  | KIAA1755   |  | EPRS     |
| OXSM    |  |  | KIAA2022   |  | ERCC5    |
| PAIP2B  |  |  | KIF1BP     |  | ERCC8    |
| PALD1   |  |  | KIR2DS3    |  | ERGIC3   |
| PBRM1   |  |  | KITLG      |  | ERICH5   |
| PBX2    |  |  | KLHDC2     |  | ERLIN2   |
| PC      |  |  | KLHL12     |  | ERMARD   |
| PCCB    |  |  | KLHL29     |  | ERO1B    |
| PCDH1   |  |  | KLK13      |  | ESD      |
| PDE1B   |  |  | KLK8       |  | ETFA     |
| PDHB    |  |  | KLLN       |  | ETNPPL   |
| PDPR    |  |  | KMT2C      |  | EVI2A    |
| PECR    |  |  | KNOP1      |  | EXOC1    |
| PER1    |  |  | KPTN       |  | EXOC4    |
| PER2    |  |  | KRBA1      |  | EXOSC7   |
| PEX13   |  |  | KRCC1      |  | EXOSC8   |
| PEX16   |  |  | KRT16P1    |  | F11R     |
| PEX6    |  |  | KRT17P3    |  | F2R      |
| PGPEP1  |  |  | KRT18P40   |  | F2RL1    |
| PHF20   |  |  | KRT18P44   |  | FAAH     |
| PHF20L1 |  |  | KRT2       |  | FABP3    |
| PIK3C3  |  |  | KRT33A     |  | FAHD2B   |
| PITHD1  |  |  | KRTAP10-10 |  | FAM110B  |
| Pitpnc1 |  |  | KRTAP21-2  |  | FAM110D  |
| PLA2G16 |  |  | L3MBTL1    |  | FAM114A2 |
| PLCB4   |  |  | L3MBTL3    |  | FAM118B  |
| PLEKHA2 |  |  | LAMP3      |  | FAM135A  |
| PLEKHN1 |  |  | LARP7      |  | FAM160A2 |
| PLIN4   |  |  | LATS1      |  | FAM171A2 |
| PLPP3   |  |  | LBH        |  | FAM180A  |
| PLXNC1  |  |  | LBP        |  | Fam184b  |
| POLR2H  |  |  | LBX1       |  | FAM185A  |

|            |  |  |              |  |         |
|------------|--|--|--------------|--|---------|
| POLR3GL    |  |  | LCAT         |  | FAM199X |
| POMGNT2    |  |  | LCN1P1       |  | FAM207A |
| PON2       |  |  | let-7        |  | Fam25c  |
| PON3       |  |  | LGALS13      |  | FAM45A  |
| Poteg      |  |  | LGALS2       |  | FAM63A  |
| PPA1       |  |  | LGALS7       |  | FAM63B  |
| PPAT       |  |  | LGALS7B      |  | FAM78A  |
| PPM1H      |  |  | LGALS8       |  | FAM8A1  |
| PPP2R3A    |  |  | LGMN         |  | FAR1    |
| PPP3R1     |  |  | LHFPL4       |  | FASTKD1 |
| Ppp4r11-ps |  |  | LHX6         |  | FBLN1   |
| PPP4R3B    |  |  | LINC00052    |  | FBXL6   |
| PPT1       |  |  | LINC00264    |  | FBXO3   |
| PQLC1      |  |  | LINC00339    |  | FBXO31  |
| PRDX1      |  |  | LINC00346    |  | FCGBP   |
| PREB       |  |  | LINC00452    |  | FCGR2A  |
| PRELID1    |  |  | LINC00543    |  | FCHO2   |
| PRKD3      |  |  | LINC00574    |  | Fcna    |
| PRNP       |  |  | LINC00623    |  | Fcrls   |
| PROK1      |  |  | LINC00638    |  | FEM1C   |
| PRSS23     |  |  | LINC00893    |  | FGD4    |
| PSMA7      |  |  | LINC00938    |  | FGF14   |
| PSMB4      |  |  | LINC00998    |  | FGFRL1  |
| PSMD13     |  |  | LINC01001    |  | FGL1    |
| PSMD7      |  |  | LINC01116    |  | FHL1    |
| PSME1      |  |  | LINC01132    |  | Fhod1   |
| PTDSS2     |  |  | LINC01293    |  | Fip111  |
| PTGER1     |  |  | LINC01326    |  | FKBP11  |
| PTGR2      |  |  | LINC01618    |  | FKBP2   |
| Ptprd      |  |  | LINC01844    |  | FKBPL   |
| PTS        |  |  | LINC01962    |  | FMC1    |
| PXMP2      |  |  | LINC02076    |  | Fnbp11  |
| QKI        |  |  | LINC02180    |  | FNDC10  |
| RAB39B     |  |  | LINS1        |  | FNDC5   |
| RAB3D      |  |  | LLPH         |  | FNIP1   |
| RAB3GAP2   |  |  | LMBRD2       |  | FOLR2   |
| RAB3IP     |  |  | LOC100128164 |  | FOXQ1   |
| RAB5B      |  |  | LOC100129027 |  | FOXSI   |
| RAB8B      |  |  | LOC100129098 |  | FRMD4B  |
| RAD18      |  |  | LOC100130345 |  | FRMD6   |
| RAE1       |  |  | LOC100289495 |  | FRY     |
| RAF1       |  |  | LOC100420587 |  | FSCN1   |
| RALGAPA2   |  |  | LOC100507191 |  | FST     |
| RAPGEF1    |  |  | LOC101928278 |  | FUNDC1  |

|         |  |  |              |            |
|---------|--|--|--------------|------------|
| RASSF8  |  |  | LOC101929163 | FURIN      |
| RBFOX2  |  |  | LOC101929523 | FZD7       |
| RBM42   |  |  | LOC101929709 | FZR1       |
| RBM5    |  |  | LOC105378397 | G3BP1      |
| RC3H2   |  |  | LOC148696    | G3BP2      |
| RCOR1   |  |  | LOC151760    | GABARAP    |
| RDH10   |  |  | LOC171391    | GABARAPL1  |
| RDH16   |  |  | LOC202181    | GADD45A    |
| REPS2   |  |  | LOC285422    | GADD45GIP1 |
| RGS2    |  |  | LOC339192    | GALT       |
| RIC8B   |  |  | LOC389906    | GAPT       |
| RNASEL  |  |  | LOC390705    | GAPVD1     |
| RNF10   |  |  | LOC399886    | Gar1       |
| RNF114  |  |  | LOC401589    | GAREM2     |
| RNF135  |  |  | LOC440040    | GARS       |
| RNF146  |  |  | LOC442028    | GART       |
| RNF19A  |  |  | LOC643441    | GAS2L1     |
| RNF215  |  |  | LOC645513    | GATA6      |
| RNF31   |  |  | LOC646736    | GATAD2B    |
| RNH1    |  |  | LOC647115    | GBF1       |
| RPAP1   |  |  | LOC727978    | GCAT       |
| RPL9    |  |  | LOC728026    | GCNT2      |
| RPLP2   |  |  | LOC730268    | GDPD1      |
| RPS7    |  |  | LOXL1        | GDPD3      |
| Rptoros |  |  | LRP10        | GFM1       |
| Rrp1    |  |  | LRRC25       | GGCT       |
| RSC1A1  |  |  | LRRC3        | GIN1       |
| S100A4  |  |  | LRRC46       | GINS3      |
| S1PR3   |  |  | LRRC57       | GJB3       |
| SAFB    |  |  | LRRC58       | GJB4       |
| SAFB2   |  |  | LRRC61       | GKAP1      |
| SAMM50  |  |  | LRRC77P      | GLB1       |
| SAP130  |  |  | LRRC9        | GLIPR1     |
| SAYS1D1 |  |  | LST1         | GLO1       |
| SBDS    |  |  | LYG2         | GLRB       |
| SBNO1   |  |  | LYN          | GLRX       |
| SBNO2   |  |  | LYNX1        | GLRX2      |
| SCAF4   |  |  | MAGEA10      | GLUD1      |
| SCAMP4  |  |  | MAGEA13P     | Gm10073    |
| SCARB1  |  |  | MAGEA8       | Gm10075    |
| SCCPDH  |  |  | MAGEB18      | Gm10125    |
| SCLY    |  |  | MAGEB6       | Gm10171    |
| SCRN3   |  |  | MAGI1        | Gm10408    |
| SCYL1   |  |  | MALRD1       | Gm1070     |

|          |  |  |          |  |         |
|----------|--|--|----------|--|---------|
| SDC3     |  |  | MAN2B2   |  | Gm11425 |
| SDHD     |  |  | MANEA    |  | Gm11942 |
| SDK2     |  |  | MAP2K5   |  | Gm12091 |
| SEC62    |  |  | MAP3K4   |  | Gm12258 |
| SEC63    |  |  | MAP6     |  | Gm12814 |
| SEP11    |  |  | MAPK11   |  | Gm12918 |
| SERGEF   |  |  | MAPRE1P1 |  | Gm13078 |
| SF3B2    |  |  | MARCH2   |  | Gm13328 |
| SF3B5    |  |  | MATN4    |  | Gm13553 |
| SFI1     |  |  | MAX      |  | Gm13981 |
| SFXN1    |  |  | MBD2     |  | Gm13991 |
| SH3GLB2  |  |  | MBD5     |  | Gm14407 |
| SH3PXD2A |  |  | MBOAT2   |  | Gm14439 |
| SHANK3   |  |  | MBP      |  | Gm14686 |
| SHB      |  |  | MDK      |  | Gm14964 |
| SHD      |  |  | MECOM    |  | Gm2036  |
| SHPK     |  |  | MED24    |  | Gm2174  |
| SIK2     |  |  | MED8     |  | Gm2423  |
| SIRT4    |  |  | MEIOB    |  | Gm2991  |
| SLC17A3  |  |  | METTL18  |  | Gm3090  |
| SLC1A7   |  |  | METTL23  |  | Gm3552  |
| SLC22A14 |  |  | METTL4   |  | Gm41386 |
| SLC25A4  |  |  | MFAP3L   |  | Gm44505 |
| SLC25A44 |  |  | MFF      |  | Gm4799  |
| SLC25A5  |  |  | MFRP     |  | Gm4832  |
| SLC37A3  |  |  | MFSD12   |  | Gm4866  |
| SLC39A11 |  |  | MFSD2A   |  | Gm4876  |
| SLC45A4  |  |  | MFSD8    |  | Gm4909  |
| SLC9A6   |  |  | MGAM2    |  | Gm4968  |
| SLC9A7   |  |  | MGAT5    |  | Gm5135  |
| SLFN13   |  |  | MICA     |  | Gm5321  |
| SLK      |  |  | MIGA2    |  | Gm5446  |
| SLMAP    |  |  | mir-1    |  | Gm5552  |
| SMAD5    |  |  | mir-1202 |  | Gm5561  |
| SMIM10L1 |  |  | mir-142  |  | Gm5564  |
| SMPD1    |  |  | mir-194  |  | Gm5643  |
| SMTN     |  |  | mir-219  |  | Gm5913  |
| SMYD4    |  |  | mir-290  |  | Gm6368  |
| SND1     |  |  | mir-299  |  | Gm6382  |
| SNW1     |  |  | mir-302  |  | Gm6433  |
| SNX27    |  |  | mir-361  |  | Gm6462  |
| SNX33    |  |  | mir-379  |  | Gm6467  |
| SOAT2    |  |  | mir-548  |  | Gm6483  |
| SOD2     |  |  | mir-602  |  | Gm6745  |

|         |  |  |         |  |            |
|---------|--|--|---------|--|------------|
| SON     |  |  | mir-630 |  | Gm6776     |
| SORBS1  |  |  | mir-767 |  | Gm6988     |
| SPATA2  |  |  | MLC1    |  | Gm7729     |
| SPATC1L |  |  | MMP16   |  | Gm7901     |
| SPECC1  |  |  | MMP2    |  | Gm8163     |
| SPHK2   |  |  | MPI     |  | Gm8194     |
| SPTLC2  |  |  | MPP1    |  | Gm8225     |
| SRA1    |  |  | MPZL2   |  | Gm8228     |
| SRP9    |  |  | MRPL10  |  | Gm8587     |
| Srrm1   |  |  | MRPL21  |  | Gm9574     |
| SSH1    |  |  | MRPL42  |  | GMCL1      |
| SSR4    |  |  | MRPS21  |  | GMIP       |
| ST3GAL3 |  |  | MRPS7   |  | GNA13      |
| ST6GAL2 |  |  | MS4A3   |  | GNAQ       |
| STIM2   |  |  | MS4A7   |  | GNAS       |
| STK10   |  |  | MSR1    |  | GNG2       |
| STK17B  |  |  | MT1CP   |  | GNL2       |
| STK25   |  |  | MT1F    |  | GNL3L      |
| STK38   |  |  | MT1H    |  | GNS        |
| STK39   |  |  | MTHFSD  |  | GOLGA2     |
| STX18   |  |  | MTMR1   |  | GOLGA5     |
| STX1A   |  |  | MTRR    |  | GOLGB1     |
| STX5    |  |  | MUC12   |  | GOLT1B     |
| STXBP4  |  |  | MUC19   |  | GORASP1    |
| Sult1a1 |  |  | MUC3B   |  | GORASP2    |
| SURF6   |  |  | MUM1L1  |  | GOSR2      |
| SYNGR1  |  |  | MUSK    |  | GPAT4      |
| SYPL1   |  |  | MXD1    |  | GPATCH4    |
| SZRD1   |  |  | MYBPH   |  | GPHB5      |
| TACC1   |  |  | MYH15   |  | Gpr137b-ps |
| Taco1os |  |  | MYH6    |  | Gprasp2    |
| TAF1C   |  |  | MYO1C   |  | GPSM1      |
| TAOK1   |  |  | MYO1H   |  | GPX2       |
| TATDN2  |  |  | NAB2    |  | GPX4       |
| TBC1D13 |  |  | NACC1   |  | GRAMD1B    |
| TBC1D4  |  |  | NASP    |  | GSG2       |
| TCF4    |  |  | NAT16   |  | GSTCD      |
| TCF7L1  |  |  | NAT2    |  | GSTP1      |
| TCP11L2 |  |  | NBPF10  |  | Gstp3      |
| TDP1    |  |  | NCKAP5  |  | GTF2H4     |
| TENM4   |  |  | NCOA1   |  | GTF2H5     |
| TGS1    |  |  | NCOR1   |  | GTPBP6     |
| THAP2   |  |  | NDRG4   |  | GUCA2B     |
| TIMM9   |  |  | NDUFAB1 |  | GYG1       |

|           |  |  |          |  |            |
|-----------|--|--|----------|--|------------|
| TIMP2     |  |  | NDUFAF3  |  | GZMH       |
| TK2       |  |  | NDUFAF4  |  | H2AFZ      |
| TKT       |  |  | NDUFAF5  |  | H2-K2      |
| TLE1      |  |  | NDUFAF6  |  | H2-Q5      |
| TLE6      |  |  | NDUFAF7  |  | H2-Q8      |
| TLR3      |  |  | NDUFB6   |  | H2-Q9      |
| TM4SF5    |  |  | NDUFV1   |  | H6PD       |
| TM7SF3    |  |  | NEK3     |  | HAS1       |
| TMC7      |  |  | NEK6     |  | HCFC2      |
| TMCC3     |  |  | NEPRO    |  | HDAC7      |
| TMED2     |  |  | NEURL3   |  | HELZ       |
| TMEM177   |  |  | NF1      |  | HERPUD1    |
| TMEM19    |  |  | NFASC    |  | HES6       |
| TMEM201   |  |  | NFKB2    |  | HEXA       |
| TMEM206   |  |  | NFX1     |  | HGFAC      |
| TMEM263   |  |  | NFXL1    |  | HIF3A      |
| TMEM57    |  |  | NGF      |  | HIGD2A     |
| TMEM94    |  |  | NHLRC4   |  | HIST2H2AA3 |
| TMEM9B    |  |  | NKX3-1   |  | HIST2H2AA4 |
| TNFRSF10A |  |  | NME1     |  | HK1        |
| TNFRSF8   |  |  | NME6     |  | HLA-A      |
| TNRC6B    |  |  | NOMO1    |  | HLA-DQA1   |
| TOR1B     |  |  | NPB      |  | HLA-DQB1   |
| TOR2A     |  |  | NPEPL1   |  | HLA-DRA    |
| TP63      |  |  | NPFFR1   |  | HLCS       |
| TP73      |  |  | NPL      |  | HM13       |
| TPD52L2   |  |  | NPM1P21  |  | HMBS       |
| TPRKB     |  |  | NPM1P46  |  | HMCN1      |
| TPX2      |  |  | NPTXR    |  | HMCN2      |
| TRAF3IP2  |  |  | NR5A2    |  | HMGN1      |
| TRAIP     |  |  | NRXN1    |  | Hmgn2      |
| TRAPPC9   |  |  | NTM      |  | Hnrnpa1    |
| TRIM44    |  |  | NTN1     |  | HNRNPC     |
| TRIM56    |  |  | NTNG1    |  | HNRNPDL    |
| TRIP12    |  |  | NUAK2    |  | HNRNPL     |
| TRNT1     |  |  | NUB1     |  | HNRNPM     |
| TSPAN18   |  |  | NUDT16P1 |  | HOPX       |
| TST       |  |  | NUDT9    |  | HOXB2      |
| TTC14     |  |  | NUP35    |  | HOXB3      |
| TTC38     |  |  | NUP54    |  | HOXB7      |
| TTC39B    |  |  | NUP85    |  | HP1BP3     |
| Ttf1      |  |  | NUS1P2   |  | HS6ST2     |
| TUBG1     |  |  | NUTF2P4  |  | HSP90AA1   |
| TXNDC11   |  |  | NVL      |  | HSP90AB1   |

|         |  |  |         |  |            |
|---------|--|--|---------|--|------------|
| UBALD1  |  |  | NXF2    |  | HSP90B1    |
| UBE2B   |  |  | NXF2B   |  | HSPA1A     |
| UBE2J1  |  |  | NXPH4   |  | HSPA1B     |
| UBQLN1  |  |  | OAT     |  | HSPA2      |
| UBQLN4  |  |  | OC90    |  | HSPA8      |
| UBR3    |  |  | OCIAD2  |  | HSPB1      |
| UBR4    |  |  | OGDH    |  | HSPBP1     |
| UBXN4   |  |  | OGFRP1  |  | HSPD1      |
| UHMK1   |  |  | OLFM4   |  | HSPE1      |
| UQCC1   |  |  | OLR1    |  | HSPH1      |
| UQCC3   |  |  | OOSP1   |  | HTATIP2    |
| UQCRC1  |  |  | OR12D3  |  | HVCN1      |
| UQCRC2  |  |  | OR13H1  |  | IAH1       |
| URGCP   |  |  | OR2A4   |  | IARS       |
| UROD    |  |  | OR2A7   |  | IARS2      |
| USP12   |  |  | OR2G6   |  | ICA1       |
| USP20   |  |  | OR2L13  |  | ICE1       |
| USP46   |  |  | OR2L8   |  | ID4        |
| UTP6    |  |  | OR52N1  |  | IDH1       |
| VAC14   |  |  | OR5C1   |  | IFNA4      |
| VAMP4   |  |  | OR5H1   |  | IFRD2      |
| VASP    |  |  | OR5K3   |  | IFT81      |
| VEGFB   |  |  | OR7E14P |  | IGF1       |
| VPS13C  |  |  | OR8D2   |  | IGFBP2     |
| VPS25   |  |  | OR8G5   |  | IGFBP4     |
| VPS45   |  |  | OR8H1   |  | Ighv5-4    |
| WASHC2A |  |  | OR9A4   |  | Ighv6-3    |
| WASHC2C |  |  | OR9K2   |  | Igkv14-100 |
| Wasl    |  |  | ORC2    |  | Igkv15-103 |
| WDR26   |  |  | ORM1    |  | Igkv3-2    |
| WDR41   |  |  | ORM2    |  | Igkv4-58   |
| WDR53   |  |  | OSCP1   |  | Igkv5-48   |
| WHAMM   |  |  | OSER1   |  | Igkv6-23   |
| WNK1    |  |  | OTOGL   |  | IGSF3      |
| WRN     |  |  | OTP     |  | IKZF1      |
| Xlr     |  |  | OVCA2   |  | IL11RA     |
| XPR1    |  |  | OVOL1   |  | IL17RC     |
| YKT6    |  |  | OXSRI   |  | IL1A       |
| YME1L1  |  |  | P2RY6   |  | IL3RA      |
| YWHAG   |  |  | P4HA2   |  | IL4I1      |
| ZBTB16  |  |  | P4HTM   |  | ILVBL      |
| ZBTB20  |  |  | PAICS   |  | IMMP1L     |
| ZBTB7A  |  |  | PALD1   |  | IMP3       |
| ZDHHC7  |  |  | PAN2    |  | IMP4       |

|               |  |  |          |  |          |
|---------------|--|--|----------|--|----------|
| Zfp874a       |  |  | PANK3    |  | IMPAD1   |
| Zfp874b       |  |  | PAQR3    |  | IMPDH2   |
| ZHX3          |  |  | PARD6G   |  | ING3     |
| ZMIZ1         |  |  | PARP9    |  | INHBA    |
| ZMYM5         |  |  | PARS2    |  | INO80    |
| ZNF106        |  |  | PC       |  | INSR     |
| ZNF12         |  |  | PCDH1    |  | INTS13   |
| ZNF236        |  |  | PCDH10   |  | INTS4    |
| ZNF24         |  |  | PCDHA7   |  | INTS5    |
| ZNF274        |  |  | PCDHB10  |  | IP6K1    |
| ZNF318        |  |  | PCDHGB5  |  | IPMK     |
| ZNF330        |  |  | PCYOX1L  |  | IPO4     |
| ZNF398        |  |  | PDE3B    |  | IPP      |
| ZNF560        |  |  | PDE4DIP  |  | IQGAP2   |
| ZNF667        |  |  | PDE6A    |  | IRAK1    |
| ZNF697        |  |  | PDE6C    |  | IRF2     |
| ZNF775        |  |  | PDE7B    |  | IRF3     |
| ZNF8          |  |  | PDGFD    |  | Irs3     |
| ZNRF2         |  |  | PDIA3    |  | ITCH     |
| ZSCAN12       |  |  | PDIA3P1  |  | ITGAE    |
| ZSCAN20       |  |  | PDLIM3   |  | ITGAM    |
| 1810014B01Rik |  |  | PGLYRP2  |  | ITGB8    |
| 1810073O08Rik |  |  | PHF13    |  | ITGBL1   |
| 2010320M18Rik |  |  | PHIP     |  | ITM2B    |
| 2610012C04Rik |  |  | PI4KA    |  | IVD      |
| 2700080J24Rik |  |  | PICRAR   |  | JADE1    |
| 2810047J09Rik |  |  | PIDD1    |  | JAGN1    |
| 2810421E14Rik |  |  | PIK3CG   |  | JAML     |
| 2900009J06Rik |  |  | PIK3R2   |  | KALRN    |
| 3830403N18Rik |  |  | PINLYP   |  | Kap      |
| 4833403J16Rik |  |  | PKD1L2   |  | KARS     |
| 4930401B11Rik |  |  | PKIB     |  | KAT2B    |
| 4930449I04Rik |  |  | PLAA     |  | KAT7     |
| 4930465M20Rik |  |  | PLAT     |  | KCNA2    |
| 4930484H19Rik |  |  | PLCG2    |  | KCNAB1   |
| 4930507D05Rik |  |  | PLEC     |  | KCNH1    |
| 4930515G01Rik |  |  | PLEK     |  | KCNK2    |
| 4930544F09Rik |  |  | PLEKHA3  |  | KCTD1    |
| 4930592A05Rik |  |  | PLEKHF2  |  | KDM5A    |
| 5430406J06Rik |  |  | PLEKHG1  |  | KDM5B    |
| 5730406G12Rik |  |  | PLGLA    |  | KDM7A    |
| 5830433M15Rik |  |  | PLPP3    |  | KDSR     |
| 6430500D05Rik |  |  | PMS2CL   |  | KEAP1    |
| 6430501K19Rik |  |  | PNLIPRP3 |  | KIAA0922 |



|               |  |  |              |  |           |
|---------------|--|--|--------------|--|-----------|
| 8030453O22Rik |  |  | POLM         |  | KIAA1217  |
| 8030498B09Rik |  |  | POLR3G       |  | KIAA1324  |
| 9330115C17Rik |  |  | POM121L2     |  | KIAA1522  |
| 9430012M22Rik |  |  | POMC         |  | KIAA1551  |
| 9430047L24Rik |  |  | POMT1        |  | KIDINS220 |
| 9430064K01Rik |  |  | POT1         |  | KIF1A     |
| 9430099H24Rik |  |  | POU2F1       |  | KIF1B     |
| A130019P10Rik |  |  | PP14571      |  | KIF3A     |
| A630035D09Rik |  |  | PPA2         |  | KIF3B     |
|               |  |  | PPARGC1B     |  | KIF3C     |
|               |  |  | PPIC         |  | KLC1      |
|               |  |  | PIIP5K1      |  | KLF6      |
|               |  |  | PPP2R3B      |  | KLF7      |
|               |  |  | PPP3R2       |  | KLHDC4    |
|               |  |  | PQLC2        |  | KLHL21    |
|               |  |  | PRAC2        |  | KLHL25    |
|               |  |  | PRAM1        |  | KLHL5     |
|               |  |  | PRAMEF4      |  | KLK3      |
|               |  |  | PRDM8        |  | Klra7     |
|               |  |  | PRKX         |  | KNG1      |
|               |  |  | PRMT9        |  | KPNB1     |
|               |  |  | PRR22        |  | KRBA1     |
|               |  |  | PRR23D1      |  | KRR1      |
|               |  |  | PRR23D2      |  | KRT6B     |
|               |  |  | PRR27        |  | KSR1      |
|               |  |  | PRR29        |  | LAIR1     |
|               |  |  | PRR30        |  | LAMP1     |
|               |  |  | PRR5-ARHGAP8 |  | LAMP2     |
|               |  |  | PSG6         |  | LAPTM4A   |
|               |  |  | PSMA1        |  | LAPTM5    |
|               |  |  | PSMA7        |  | LARGE1    |
|               |  |  | PSMB1        |  | LARP7     |
|               |  |  | PSMD12       |  | LARS      |
|               |  |  | PSMF1        |  | LBH       |
|               |  |  | PTER         |  | LCN2      |
|               |  |  | PTF1A        |  | LCP1      |
|               |  |  | PTGDR        |  | LDAH      |
|               |  |  | PTGER3       |  | LDHD      |
|               |  |  | PTGFRN       |  | LDLR      |
|               |  |  | PTGIS        |  | LEF1      |
|               |  |  | PTPMT1       |  | LEFTY1    |
|               |  |  | PTPN14       |  | LEPROT    |
|               |  |  | PTPN22       |  | LGALS4    |
|               |  |  | PXMP4        |  | LGALS8    |

|  |  |  |           |  |              |
|--|--|--|-----------|--|--------------|
|  |  |  | PYCARD    |  | LGALS1       |
|  |  |  | QARS      |  | LIAS         |
|  |  |  | RAB1B     |  | LIF          |
|  |  |  | RAB27A    |  | LIG3         |
|  |  |  | RAB44     |  | LILRB4       |
|  |  |  | RAB4B     |  | LIPG         |
|  |  |  | RABEP1    |  | LMAN2L       |
|  |  |  | RABGGTB   |  | LMNA         |
|  |  |  | RABL2A    |  | LMNB2        |
|  |  |  | RANBP10   |  | LOC102724023 |
|  |  |  | RAP1GDS1  |  | LONRF3       |
|  |  |  | RAP2B     |  | LOR          |
|  |  |  | RASAL2    |  | LOX          |
|  |  |  | RASGRP3   |  | LOXL3        |
|  |  |  | RASL11A   |  | LPIN2        |
|  |  |  | RBM24     |  | LPO          |
|  |  |  | RBM46     |  | LRG1         |
|  |  |  | RBMX2     |  | LRP1         |
|  |  |  | RBMX1A1   |  | LRP10        |
|  |  |  | RBMX3AP   |  | LRP2         |
|  |  |  | RCCD1     |  | LRRC15       |
|  |  |  | RCHY1     |  | LRRC59       |
|  |  |  | RDH14     |  | LRRC8B       |
|  |  |  | REPS2     |  | LRRFIP1      |
|  |  |  | RET       |  | LSM6         |
|  |  |  | RGS7      |  | Lst1         |
|  |  |  | RHOH      |  | LTF          |
|  |  |  | RHOXF1    |  | LUM          |
|  |  |  | RIOK1     |  | Ly6a         |
|  |  |  | RNF126P1  |  | LY6G6D       |
|  |  |  | RNF135    |  | LYAR         |
|  |  |  | RNF138    |  | LYL1         |
|  |  |  | RNF182    |  | Lypd2        |
|  |  |  | RNPS1P1   |  | LYSMD2       |
|  |  |  | RNU12-2P  |  | MAN2B1       |
|  |  |  | RORA      |  | MAN2B2       |
|  |  |  | RPL23AP12 |  | MAN2C1       |
|  |  |  | RPL23AP42 |  | MANBA        |
|  |  |  | RPL4P2    |  | MAP1B        |
|  |  |  | RPL9      |  | MAP1S        |
|  |  |  | RPP30     |  | MAP2K4       |
|  |  |  | RPS21     |  | MAP2K6       |
|  |  |  | RPS27A    |  | MAP7         |
|  |  |  | RPS27AP11 |  | MAPK6        |

|  |  |          |             |
|--|--|----------|-------------|
|  |  | RPS28    | MAPK8IP1    |
|  |  | RPS4X    | MAPKAP1     |
|  |  | RPS6KC1  | MAPRE1      |
|  |  | RRP15    | Marcks      |
|  |  | RSAD1    | MARVELD3    |
|  |  | RSC1A1   | MASP2       |
|  |  | RUFY2    | MAT2B       |
|  |  | RWDD1    | MBD5        |
|  |  | S100BPB  | MBNL2       |
|  |  | S1PR1    | MBTD1       |
|  |  | SAA1     | MCM2        |
|  |  | SAE1     | MCMBP       |
|  |  | SAMD12   | MCRIP2      |
|  |  | SBF2     | MDH2        |
|  |  | SBF2-AS1 | MDK         |
|  |  | SBK1     | MED1        |
|  |  | SCARB1   | MED15       |
|  |  | SCARB2   | MED27       |
|  |  | SCFD2    | MEIS3       |
|  |  | SCMH1    | METTTL1     |
|  |  | SCO1     | MFAP3L      |
|  |  | SCRN1    | MFSD11      |
|  |  | SDC4     | MIA         |
|  |  | SDHAP1   | MICALL1     |
|  |  | SDHC     | MICU2       |
|  |  | SDHCP2   | MID1        |
|  |  | SDR16C5  | MID2        |
|  |  | SEC11C   | MIER1       |
|  |  | SEC14L6  | MIER2       |
|  |  | SEC23B   | MINOS1-NBL1 |
|  |  | SEC31A   | MKI67       |
|  |  | SELENOF  | MKNK1       |
|  |  | SEMA5A   | MLEC        |
|  |  | SEP3     | MMP11       |
|  |  | SEP4     | MMP14       |
|  |  | SEPHS1P4 | MMP2        |
|  |  | SERINC5  | MMP24       |
|  |  | SERPINB6 | MOB4        |
|  |  | SERTAD2  | MOGS        |
|  |  | SESN1    | MOSPD1      |
|  |  | SETD3    | MOSPD3      |
|  |  | SFXN4    | MPHOSPH6    |
|  |  | SH3GL2   | MRC1        |
|  |  | SH3KBP1  | MRE11       |

|  |  |  |           |  |         |
|--|--|--|-----------|--|---------|
|  |  |  | SH3RF2    |  | MRPL15  |
|  |  |  | SHANK3    |  | MRPL16  |
|  |  |  | SHISA2    |  | MRPL17  |
|  |  |  | SHOX2     |  | MRPL28  |
|  |  |  | SHROOM2   |  | MRPL3   |
|  |  |  | SIAH1     |  | MRPL38  |
|  |  |  | SIAH2     |  | MRPL4   |
|  |  |  | SIDT1     |  | MRPL52  |
|  |  |  | SIMC1     |  | MRPS10  |
|  |  |  | SLAIN1    |  | MRPS12  |
|  |  |  | SLC12A5   |  | MRPS24  |
|  |  |  | SLC12A7   |  | MRPS28  |
|  |  |  | SLC16A6P1 |  | MRPS33  |
|  |  |  | SLC18B1   |  | MRPS9   |
|  |  |  | SLC22A24  |  | MSI2    |
|  |  |  | SLC24A4   |  | MSMO1   |
|  |  |  | SLC25A5P8 |  | MTCH2   |
|  |  |  | SLC26A6   |  | MTHFD2  |
|  |  |  | SLC26A9   |  | MTMR1   |
|  |  |  | SLC2A4RG  |  | MTMR11  |
|  |  |  | SLC35B1   |  | MTPN    |
|  |  |  | SLC38A7   |  | MTX1    |
|  |  |  | SLC43A3   |  | MUC13   |
|  |  |  | SLC44A3   |  | Muc4    |
|  |  |  | SLC47A1   |  | MUSTN1  |
|  |  |  | SLC4A1    |  | MYADM   |
|  |  |  | SLC5A10   |  | MYBBP1A |
|  |  |  | SLC7A13   |  | MYC     |
|  |  |  | SLC9A9    |  | MYCBPAP |
|  |  |  | SLC9B1P4  |  | MYD88   |
|  |  |  | SLFN13    |  | MYH10   |
|  |  |  | SMAD4     |  | MYH9    |
|  |  |  | SMARCA2   |  | MYL1    |
|  |  |  | SMPD4     |  | MYL4    |
|  |  |  | SNHG3     |  | MYLK2   |
|  |  |  | SNN       |  | MYLPF   |
|  |  |  | SNORA16A  |  | Myo15b  |
|  |  |  | SNORA55   |  | MYO1D   |
|  |  |  | SNORA69   |  | MYO1F   |
|  |  |  | SNORA70C  |  | MYO9B   |
|  |  |  | SNORD105  |  | MYOF    |
|  |  |  | SNORD109B |  | MYRIP   |
|  |  |  | SNORD119  |  | N4BP2L1 |
|  |  |  | SNORD36C  |  | N6AMT1  |

|  |  |  |           |  |         |
|--|--|--|-----------|--|---------|
|  |  |  | SNORD37   |  | NAA10   |
|  |  |  | SNORD4B   |  | NACA    |
|  |  |  | SNORD68   |  | NADK    |
|  |  |  | SNORD89   |  | Naip1   |
|  |  |  | SNORD96B  |  | NAP1L1  |
|  |  |  | SNRNP27   |  | NARF    |
|  |  |  | SNRNP48   |  | NARS    |
|  |  |  | SNRPA1    |  | NBEAL1  |
|  |  |  | SNTB2     |  | NBL1    |
|  |  |  | SNX32     |  | NCAPG2  |
|  |  |  | SORBS1    |  | NCAPH   |
|  |  |  | SOWAHC    |  | NCAPH2  |
|  |  |  | SOX17     |  | NCDN    |
|  |  |  | SP140     |  | NCEH1   |
|  |  |  | SPAG8     |  | NCKAP1L |
|  |  |  | SPANXD    |  | NCL     |
|  |  |  | SPARCL1   |  | NCOA4   |
|  |  |  | SPATA2L   |  | NDFIP2  |
|  |  |  | SPATA31C2 |  | NDN     |
|  |  |  | SPDYA     |  | NDOR1   |
|  |  |  | SPDYE2    |  | NDRG1   |
|  |  |  | SPINK8    |  | NDUFA12 |
|  |  |  | SPPL2B    |  | NDUFA3  |
|  |  |  | SRC       |  | NDUFAB1 |
|  |  |  | SRGAP2    |  | NDUFAB2 |
|  |  |  | SRI       |  | NDUFAB5 |
|  |  |  | SRP9P1    |  | NDUFS3  |
|  |  |  | SRRM1P3   |  | NDUFV1  |
|  |  |  | SRRM2     |  | NECAP1  |
|  |  |  | SRSF9     |  | NECAP2  |
|  |  |  | SSH1      |  | NECTIN2 |
|  |  |  | SSPN      |  | NEDD4L  |
|  |  |  | SSR1      |  | NEDD9   |
|  |  |  | SSR2      |  | NEK1    |
|  |  |  | SSX2      |  | NELFE   |
|  |  |  | SSX2B     |  | NEU1    |
|  |  |  | ST13P6    |  | NEURL2  |
|  |  |  | ST20      |  | NEUROD6 |
|  |  |  | STAG3L4   |  | NFAT5   |
|  |  |  | STARD10   |  | NFATC4  |
|  |  |  | STARD5    |  | NFE2    |
|  |  |  | STARD7    |  | NFIB    |
|  |  |  | STAT6     |  | NFIC    |
|  |  |  | STK31     |  | NFIX    |

|  |  |  |         |  |           |
|--|--|--|---------|--|-----------|
|  |  |  | STN1    |  | NFKB2     |
|  |  |  | STOML2  |  | NFKBIE    |
|  |  |  | STOX2   |  | NFYA      |
|  |  |  | STRADA  |  | NFYC      |
|  |  |  | STRADB  |  | NHLRC1    |
|  |  |  | STX7    |  | NHLRC3    |
|  |  |  | SUGT1   |  | NHP2      |
|  |  |  | SULF2   |  | NHSL1     |
|  |  |  | SUMO2P6 |  | NIPBL     |
|  |  |  | SUOX    |  | NIPSNAP3A |
|  |  |  | SYNC    |  | Nisch     |
|  |  |  | SYNE3   |  | NKX2-2    |
|  |  |  | SYNPO2  |  | NME7      |
|  |  |  | SYPL2   |  | NMRAL1    |
|  |  |  | SYT15   |  | NNAT      |
|  |  |  | SYT4    |  | Nnt       |
|  |  |  | TACR1   |  | NOA1      |
|  |  |  | TAGLN   |  | NOC2L     |
|  |  |  | TANC2   |  | NOL11     |
|  |  |  | TAPBP   |  | NOL12     |
|  |  |  | TBC1D28 |  | NOL6      |
|  |  |  | TBKBP1  |  | NOMO1     |
|  |  |  | TBX10   |  | NOP14     |
|  |  |  | TBX5    |  | NOSTRIN   |
|  |  |  | TCAIM   |  | NOTCH1    |
|  |  |  | TCEA2   |  | NOTCH4    |
|  |  |  | TCF21   |  | NPC1      |
|  |  |  | TCF25   |  | NPEPL1    |
|  |  |  | TCFL5   |  | NPFFR2    |
|  |  |  | TCN2    |  | NPHP4     |
|  |  |  | TCP11L1 |  | NPR1      |
|  |  |  | TDGF1   |  | NR1I3     |
|  |  |  | TDRD5   |  | NR2F2     |
|  |  |  | TECPR2  |  | NR5A2     |
|  |  |  | TERF2   |  | NRXN2     |
|  |  |  | TESC    |  | NSD2      |
|  |  |  | TET3    |  | NSDHL     |
|  |  |  | TEX22   |  | NSFL1C    |
|  |  |  | TFAMP2  |  | NSUN5     |
|  |  |  | TFPI    |  | NT5C2     |
|  |  |  | TFRC    |  | NTAN1     |
|  |  |  | TGFB2   |  | NTMT1     |
|  |  |  | TIGD7   |  | NTN5      |
|  |  |  | TIMM44  |  | NUBP1     |

|  |  |  |           |  |         |
|--|--|--|-----------|--|---------|
|  |  |  | TINAG     |  | NUBPL   |
|  |  |  | TKFC      |  | NUDT21  |
|  |  |  | TLDC1     |  | NUDT4   |
|  |  |  | TLE6      |  | NUMB    |
|  |  |  | TLR4      |  | NUPR1   |
|  |  |  | TMC8      |  | NXN     |
|  |  |  | TMED10P1  |  | NXT1    |
|  |  |  | TMED8     |  | NXT2    |
|  |  |  | TMEM123   |  | Oaz1-ps |
|  |  |  | TMEM126B  |  | OBP2B   |
|  |  |  | TMEM217   |  | ODC1    |
|  |  |  | TMEM235   |  | OGFRL1  |
|  |  |  | TMEM251   |  | OLFM1   |
|  |  |  | TMEM255A  |  | Olf1113 |
|  |  |  | TMEM44    |  | Olf1115 |
|  |  |  | TMEM59    |  | Olf1329 |
|  |  |  | TMEM63B   |  | Olf458  |
|  |  |  | TMEM72    |  | OPTN    |
|  |  |  | TMEM80    |  | OR6A2   |
|  |  |  | TMEM91    |  | OR6C6   |
|  |  |  | TMTC1     |  | OR7G3   |
|  |  |  | TMTC4     |  | ORC5    |
|  |  |  | TNFSF14   |  | OSBP    |
|  |  |  | TNFSF4    |  | OSTM1   |
|  |  |  | TNR       |  | OTC     |
|  |  |  | TNS2      |  | OTUD6B  |
|  |  |  | TOM1      |  | OTUD7B  |
|  |  |  | TP53      |  | OVOS2   |
|  |  |  | TP53TG3HP |  | P2RX4   |
|  |  |  | TPD52L3   |  | P2RX5   |
|  |  |  | TPM1      |  | P2RX7   |
|  |  |  | TPRXL     |  | P2RY13  |
|  |  |  | TPTE2P3   |  | P2RY6   |
|  |  |  | TRADD     |  | P4HA1   |
|  |  |  | TRAPPC1   |  | PABPC1  |
|  |  |  | TRHR      |  | PABPC4  |
|  |  |  | TRIM37    |  | PADI2   |
|  |  |  | TRIM49B   |  | Pakap   |
|  |  |  | TRIM51FP  |  | PAMR1   |
|  |  |  | TRIM62    |  | PAPD7   |
|  |  |  | TRIML1    |  | PAPLN   |
|  |  |  | TRMT2A    |  | PAPSS1  |
|  |  |  | TRNAU1AP  |  | PARD3   |
|  |  |  | TRPC6     |  | PARM1   |

|  |  |  |            |  |          |
|--|--|--|------------|--|----------|
|  |  |  | TRPV4      |  | PARP4    |
|  |  |  | TSG101     |  | PARVG    |
|  |  |  | TSPAN1     |  | PATJ     |
|  |  |  | TSPY1      |  | PAWR     |
|  |  |  | TSPY6P     |  | PBK      |
|  |  |  | TTC30B     |  | PCBP1    |
|  |  |  | TTC34      |  | PCBP2    |
|  |  |  | TTC38      |  | PCCA     |
|  |  |  | TTY13      |  | PCDH17   |
|  |  |  | TTY17A     |  | PCDHB4   |
|  |  |  | TTY5       |  | PCDHGA4  |
|  |  |  | TTY6B      |  | PCIF1    |
|  |  |  | TVP23C     |  | PCOLCE2  |
|  |  |  | TXN        |  | PCSK4    |
|  |  |  | UAP1L1     |  | PCYOX1   |
|  |  |  | UBA7       |  | PCYT1B   |
|  |  |  | UBE2D3     |  | PCYT2    |
|  |  |  | UBE2J1     |  | PDAP1    |
|  |  |  | UBE2K      |  | PDCD2    |
|  |  |  | UBE2L3     |  | PDCD4    |
|  |  |  | UBE2L6     |  | PDE1B    |
|  |  |  | UBL4B      |  | PDE3A    |
|  |  |  | UBTFL11    |  | PDE4DIP  |
|  |  |  | UBXN8      |  | PDE7A    |
|  |  |  | UCA1       |  | PDGFRB   |
|  |  |  | UGT2B17    |  | PDIA6    |
|  |  |  | UMAD1      |  | Pdlim3   |
|  |  |  | UMODL1-AS1 |  | PDPK1    |
|  |  |  | UNC13D     |  | PDXK     |
|  |  |  | UNC93B2    |  | PDZK1IP1 |
|  |  |  | UNKL       |  | PEAR1    |
|  |  |  | UPF2       |  | PECAM1   |
|  |  |  | USP17L6P   |  | PEF1     |
|  |  |  | USP2       |  | PEG3     |
|  |  |  | USP24      |  | PES1     |
|  |  |  | USP4       |  | PEX6     |
|  |  |  | USP50      |  | PFN1     |
|  |  |  | USP9Y      |  | PGLYRP1  |
|  |  |  | USPL1      |  | PHAX     |
|  |  |  | VBP1       |  | PHF10    |
|  |  |  | VCL        |  | PHF12    |
|  |  |  | VDR        |  | PHF13    |
|  |  |  | VGLL2      |  | PHF20L1  |
|  |  |  | VPS13A-AS1 |  | PHGDH    |



|  |  |          |          |
|--|--|----------|----------|
|  |  | VPS35    | PHKB     |
|  |  | VSTM2A   | PHLPP1   |
|  |  | WAC      | PHYKPL   |
|  |  | WASH5P   | PI4KB    |
|  |  | WBP4     | PIAS2    |
|  |  | WDPCP    | PID1     |
|  |  | WDR12    | PIGH     |
|  |  | WDR33    | PIGL     |
|  |  | WDR83    | PIK3CD   |
|  |  | WFDC10A  | PIK3CG   |
|  |  | WNK2     | PIK3R1   |
|  |  | XAGE3    | PIK3R3   |
|  |  | XCL1     | PIM3     |
|  |  | XKRX     | PIP4K2A  |
|  |  | XYLT1    | PIP4K2C  |
|  |  | YIPF2    | Pira11   |
|  |  | YKT6     | Pira4    |
|  |  | YY1AP1   | Pisd-ps1 |
|  |  | ZAP70    | Pisd-ps2 |
|  |  | ZBBX     | PJA1     |
|  |  | ZBTB12   | PJA2     |
|  |  | ZBTB45   | PKDCC    |
|  |  | ZBTB8OS  | PKN3     |
|  |  | ZCCHC18  | PKNOX1   |
|  |  | ZDHHC1   | PKP4     |
|  |  | ZFP82    | PLA1A    |
|  |  | ZFR2     | PLA2G4B  |
|  |  | ZGPAT    | PLA2G4E  |
|  |  | ZKSCAN1  | PLAU     |
|  |  | ZNF131   | PLCD1    |
|  |  | ZNF132   | PLCG2    |
|  |  | ZNF134   | PLD3     |
|  |  | ZNF16    | PLD4     |
|  |  | ZNF2     | PLEC     |
|  |  | ZNF22    | PLEKHA5  |
|  |  | ZNF225   | PLEKHM3  |
|  |  | ZNF234   | PLET1    |
|  |  | ZNF253   | PLGRKT   |
|  |  | ZNF259P1 | PLIN1    |
|  |  | ZNF274   | PLIN2    |
|  |  | ZNF286A  | PLPP3    |
|  |  | ZNF300   | PLSCR4   |
|  |  | ZNF331   | PLXNA2   |
|  |  | ZNF333   | PMEPA1   |

|  |  |             |  |          |
|--|--|-------------|--|----------|
|  |  | ZNF385B     |  | PMM1     |
|  |  | ZNF407      |  | PNISR    |
|  |  | ZNF416      |  | PNPLA1   |
|  |  | ZNF417      |  | PNPLA7   |
|  |  | ZNF468      |  | PNPO     |
|  |  | ZNF493      |  | POC1B    |
|  |  | ZNF563      |  | POLD1    |
|  |  | ZNF581      |  | POLD2    |
|  |  | ZNF587      |  | POLE4    |
|  |  | ZNF589      |  | POLR1C   |
|  |  | ZNF614      |  | POLR2C   |
|  |  | ZNF623      |  | POLR2F   |
|  |  | ZNF674-AS1  |  | POLR3K   |
|  |  | ZNF677      |  | PON1     |
|  |  | ZNF699      |  | POP4     |
|  |  | ZNF706      |  | POU6F1   |
|  |  | ZNF716      |  | PPAN     |
|  |  | ZNF737      |  | PPFIBP2  |
|  |  | ZNF799      |  | PPIC     |
|  |  | ZNF844      |  | PPIH     |
|  |  | ZNF93       |  | PPM1A    |
|  |  | ZNRF1       |  | PPM1B    |
|  |  | ZSCAN16-AS1 |  | PPM1K    |
|  |  |             |  | PPM1M    |
|  |  |             |  | PPP1CB   |
|  |  |             |  | PPP1R14D |
|  |  |             |  | Ppp2r5c  |
|  |  |             |  | PPP4R3B  |
|  |  |             |  | PPP5C    |
|  |  |             |  | PRAP1    |
|  |  |             |  | PRDX1    |
|  |  |             |  | PREPL    |
|  |  |             |  | PRKCD    |
|  |  |             |  | PRKG1    |
|  |  |             |  | PRMT5    |
|  |  |             |  | PRPF38A  |
|  |  |             |  | PRPF38B  |
|  |  |             |  | PRPF6    |
|  |  |             |  | PRPF8    |
|  |  |             |  | PRPS1    |
|  |  |             |  | PRR15L   |
|  |  |             |  | Prr33    |
|  |  |             |  | PRRC2C   |
|  |  |             |  | PRRG1    |

|  |  |  |  |  |         |
|--|--|--|--|--|---------|
|  |  |  |  |  | Prrt1   |
|  |  |  |  |  | PRRX1   |
|  |  |  |  |  | PSAP    |
|  |  |  |  |  | PSAT1   |
|  |  |  |  |  | PSEN1   |
|  |  |  |  |  | PSMG2   |
|  |  |  |  |  | PTBP1   |
|  |  |  |  |  | PTCD2   |
|  |  |  |  |  | PTGES3  |
|  |  |  |  |  | PTGES3L |
|  |  |  |  |  | PTN     |
|  |  |  |  |  | PTP4A1  |
|  |  |  |  |  | PTPN1   |
|  |  |  |  |  | PTPN14  |
|  |  |  |  |  | PTPN6   |
|  |  |  |  |  | Ptprd   |
|  |  |  |  |  | PTPRO   |
|  |  |  |  |  | PURB    |
|  |  |  |  |  | PUS1    |
|  |  |  |  |  | PVALB   |
|  |  |  |  |  | QPRT    |
|  |  |  |  |  | QSOX1   |
|  |  |  |  |  | QTRT1   |
|  |  |  |  |  | RAB23   |
|  |  |  |  |  | RAB9A   |
|  |  |  |  |  | RABGAP1 |
|  |  |  |  |  | RABL2A  |
|  |  |  |  |  | RABL6   |
|  |  |  |  |  | RAC3    |
|  |  |  |  |  | RAD50   |
|  |  |  |  |  | Raet1b  |
|  |  |  |  |  | RALB    |
|  |  |  |  |  | RALY    |
|  |  |  |  |  | RAMP1   |
|  |  |  |  |  | RANBP9  |
|  |  |  |  |  | RANGAP1 |
|  |  |  |  |  | RAP2C   |
|  |  |  |  |  | RAPGEF5 |
|  |  |  |  |  | RARG    |
|  |  |  |  |  | RARRES2 |
|  |  |  |  |  | RARS    |
|  |  |  |  |  | RASA4   |
|  |  |  |  |  | RASL12  |
|  |  |  |  |  | RASSF5  |

|  |  |  |  |  |         |
|--|--|--|--|--|---------|
|  |  |  |  |  | RAVER1  |
|  |  |  |  |  | RAVER2  |
|  |  |  |  |  | RB1     |
|  |  |  |  |  | RBBP8   |
|  |  |  |  |  | RBM10   |
|  |  |  |  |  | RBM18   |
|  |  |  |  |  | RBM39   |
|  |  |  |  |  | RBM42   |
|  |  |  |  |  | RBM47   |
|  |  |  |  |  | RBM48   |
|  |  |  |  |  | RBM8A   |
|  |  |  |  |  | Rbm8a2  |
|  |  |  |  |  | RBPM5   |
|  |  |  |  |  | RCHY1   |
|  |  |  |  |  | RCL1    |
|  |  |  |  |  | RCOR1   |
|  |  |  |  |  | RCSD1   |
|  |  |  |  |  | REEP3   |
|  |  |  |  |  | RENBP   |
|  |  |  |  |  | Retnlg  |
|  |  |  |  |  | REXO2   |
|  |  |  |  |  | RFC4    |
|  |  |  |  |  | RFFL    |
|  |  |  |  |  | RGL3    |
|  |  |  |  |  | RGP1    |
|  |  |  |  |  | RHBDD1  |
|  |  |  |  |  | RHBDL2  |
|  |  |  |  |  | RHEB    |
|  |  |  |  |  | RHOF    |
|  |  |  |  |  | RHOJ    |
|  |  |  |  |  | RHOU    |
|  |  |  |  |  | RILPL2  |
|  |  |  |  |  | RING1   |
|  |  |  |  |  | RIOK1   |
|  |  |  |  |  | RIOX1   |
|  |  |  |  |  | RNASE2  |
|  |  |  |  |  | RNASE6  |
|  |  |  |  |  | RNASET2 |
|  |  |  |  |  | RND2    |
|  |  |  |  |  | RNF103  |
|  |  |  |  |  | RNF139  |
|  |  |  |  |  | RNF181  |
|  |  |  |  |  | RNF208  |
|  |  |  |  |  | RNF6    |

|  |  |  |  |  |            |
|--|--|--|--|--|------------|
|  |  |  |  |  | RNGTT      |
|  |  |  |  |  | RNMT       |
|  |  |  |  |  | ROR2       |
|  |  |  |  |  | RPA2       |
|  |  |  |  |  | RPF1       |
|  |  |  |  |  | RPIA       |
|  |  |  |  |  | RPL12      |
|  |  |  |  |  | RPL18      |
|  |  |  |  |  | RPL18A     |
|  |  |  |  |  | Rpl21-ps4  |
|  |  |  |  |  | RPL24      |
|  |  |  |  |  | RPL26      |
|  |  |  |  |  | RPL27A     |
|  |  |  |  |  | Rpl27a-ps1 |
|  |  |  |  |  | RPL28      |
|  |  |  |  |  | Rpl31-ps15 |
|  |  |  |  |  | Rpl31-ps20 |
|  |  |  |  |  | RPL35      |
|  |  |  |  |  | RPL6       |
|  |  |  |  |  | RPL7L1     |
|  |  |  |  |  | RPLP0      |
|  |  |  |  |  | RPS10      |
|  |  |  |  |  | Rps12-ps24 |
|  |  |  |  |  | Rps13-ps5  |
|  |  |  |  |  | RPS15      |
|  |  |  |  |  | RPS16      |
|  |  |  |  |  | RPS21      |
|  |  |  |  |  | RPS24      |
|  |  |  |  |  | RPS29      |
|  |  |  |  |  | RPS3       |
|  |  |  |  |  | RPS5       |
|  |  |  |  |  | RPS6KB1    |
|  |  |  |  |  | Rpsa-ps1   |
|  |  |  |  |  | Rpsa-ps2   |
|  |  |  |  |  | RPTOR      |
|  |  |  |  |  | RPUSD4     |
|  |  |  |  |  | RRM1       |
|  |  |  |  |  | RRP8       |
|  |  |  |  |  | RRP9       |
|  |  |  |  |  | RSF1       |
|  |  |  |  |  | RSPH9      |
|  |  |  |  |  | RSRC1      |
|  |  |  |  |  | Rsrc2      |
|  |  |  |  |  | RTCB       |

|  |  |  |  |  |          |
|--|--|--|--|--|----------|
|  |  |  |  |  | RTN3     |
|  |  |  |  |  | RUNX1T1  |
|  |  |  |  |  | RUVBL1   |
|  |  |  |  |  | RXFP3    |
|  |  |  |  |  | S100A8   |
|  |  |  |  |  | SAE1     |
|  |  |  |  |  | SAMHD1   |
|  |  |  |  |  | SAP130   |
|  |  |  |  |  | SARAF    |
|  |  |  |  |  | SART1    |
|  |  |  |  |  | SBF1     |
|  |  |  |  |  | SBF2     |
|  |  |  |  |  | SCAMP2   |
|  |  |  |  |  | SCAMP5   |
|  |  |  |  |  | SCAP     |
|  |  |  |  |  | SCFD1    |
|  |  |  |  |  | SCGB3A1  |
|  |  |  |  |  | SCGB3A2  |
|  |  |  |  |  | SCRIB    |
|  |  |  |  |  | SDC4     |
|  |  |  |  |  | SDCBP    |
|  |  |  |  |  | SDCBP2   |
|  |  |  |  |  | SDF2     |
|  |  |  |  |  | SDF2L1   |
|  |  |  |  |  | SDHAF1   |
|  |  |  |  |  | SEC11A   |
|  |  |  |  |  | SEC61B   |
|  |  |  |  |  | SEH1L    |
|  |  |  |  |  | SELENON  |
|  |  |  |  |  | SELENOP  |
|  |  |  |  |  | SELENOW  |
|  |  |  |  |  | SELPLG   |
|  |  |  |  |  | SENPI    |
|  |  |  |  |  | SEP8     |
|  |  |  |  |  | SEP9     |
|  |  |  |  |  | SERAC1   |
|  |  |  |  |  | SERINC1  |
|  |  |  |  |  | SERINC2  |
|  |  |  |  |  | SERINC3  |
|  |  |  |  |  | SERPINA1 |
|  |  |  |  |  | SERPINA6 |
|  |  |  |  |  | SERPINB6 |
|  |  |  |  |  | SERPING1 |
|  |  |  |  |  | SERPINH1 |

|  |  |  |  |          |
|--|--|--|--|----------|
|  |  |  |  | SERTAD3  |
|  |  |  |  | SETD5    |
|  |  |  |  | SF3B2    |
|  |  |  |  | SFTPD    |
|  |  |  |  | SFXN1    |
|  |  |  |  | SGCA     |
|  |  |  |  | SGK3     |
|  |  |  |  | SGPL1    |
|  |  |  |  | SH3BGRL3 |
|  |  |  |  | SH3BP2   |
|  |  |  |  | SH3KBP1  |
|  |  |  |  | SH3PXD2B |
|  |  |  |  | SH3TC2   |
|  |  |  |  | SHC1     |
|  |  |  |  | SHMT1    |
|  |  |  |  | SHMT2    |
|  |  |  |  | SIDT2    |
|  |  |  |  | SIN3A    |
|  |  |  |  | SIN3B    |
|  |  |  |  | SKI      |
|  |  |  |  | SKP2     |
|  |  |  |  | SLA      |
|  |  |  |  | SLC11A2  |
|  |  |  |  | SLC12A2  |
|  |  |  |  | SLC15A2  |
|  |  |  |  | SLC1A5   |
|  |  |  |  | SLC24A3  |
|  |  |  |  | SLC25A10 |
|  |  |  |  | SLC25A19 |
|  |  |  |  | SLC25A27 |
|  |  |  |  | SLC25A3  |
|  |  |  |  | SLC25A36 |
|  |  |  |  | SLC25A38 |
|  |  |  |  | SLC26A4  |
|  |  |  |  | SLC26A9  |
|  |  |  |  | SLC27A2  |
|  |  |  |  | SLC30A9  |
|  |  |  |  | SLC31A1  |
|  |  |  |  | SLC35B1  |
|  |  |  |  | SLC35B2  |
|  |  |  |  | SLC35B3  |
|  |  |  |  | SLC37A2  |
|  |  |  |  | SLC38A9  |
|  |  |  |  | SLC39A11 |

|  |  |  |  |  |         |
|--|--|--|--|--|---------|
|  |  |  |  |  | SLC39A8 |
|  |  |  |  |  | SLC40A1 |
|  |  |  |  |  | SLC44A2 |
|  |  |  |  |  | SLC4A7  |
|  |  |  |  |  | SLC5A8  |
|  |  |  |  |  | SLC6A13 |
|  |  |  |  |  | SLC7A8  |
|  |  |  |  |  | SLC8A1  |
|  |  |  |  |  | SLC8B1  |
|  |  |  |  |  | SLCO4A1 |
|  |  |  |  |  | SLIRP   |
|  |  |  |  |  | SLTM    |
|  |  |  |  |  | SMAGP   |
|  |  |  |  |  | SMARCA4 |
|  |  |  |  |  | SMC1A   |
|  |  |  |  |  | SMC2    |
|  |  |  |  |  | SMC3    |
|  |  |  |  |  | SMCHD1  |
|  |  |  |  |  | SMIM15  |
|  |  |  |  |  | Smim4   |
|  |  |  |  |  | SMPD3   |
|  |  |  |  |  | SMPDL3A |
|  |  |  |  |  | SMU1    |
|  |  |  |  |  | SNAP25  |
|  |  |  |  |  | SNN     |
|  |  |  |  |  | SNRNP48 |
|  |  |  |  |  | Snrpa   |
|  |  |  |  |  | SNRPB   |
|  |  |  |  |  | SNRPF   |
|  |  |  |  |  | SNU13   |
|  |  |  |  |  | SNX18   |
|  |  |  |  |  | SOD1    |
|  |  |  |  |  | SOX12   |
|  |  |  |  |  | SOX5    |
|  |  |  |  |  | SPATA9  |
|  |  |  |  |  | SPECC1  |
|  |  |  |  |  | SPINT1  |
|  |  |  |  |  | SPP1    |
|  |  |  |  |  | Sprr2a3 |
|  |  |  |  |  | Sprr2b  |
|  |  |  |  |  | Sprr2d  |
|  |  |  |  |  | Sprr2g  |
|  |  |  |  |  | SPSB2   |
|  |  |  |  |  | SPSB4   |



|  |  |  |  |  |          |
|--|--|--|--|--|----------|
|  |  |  |  |  | SQLE     |
|  |  |  |  |  | SQSTM1   |
|  |  |  |  |  | SREBF2   |
|  |  |  |  |  | SRM      |
|  |  |  |  |  | SRP14    |
|  |  |  |  |  | SRP54    |
|  |  |  |  |  | SRP9     |
|  |  |  |  |  | SRSF10   |
|  |  |  |  |  | SRSF11   |
|  |  |  |  |  | SRSF2    |
|  |  |  |  |  | SRXN1    |
|  |  |  |  |  | SSBP4    |
|  |  |  |  |  | SSPN     |
|  |  |  |  |  | SSRP1    |
|  |  |  |  |  | SSSCA1   |
|  |  |  |  |  | ST3GAL3  |
|  |  |  |  |  | ST8SIA4  |
|  |  |  |  |  | STAB1    |
|  |  |  |  |  | STARD10  |
|  |  |  |  |  | STARD3NL |
|  |  |  |  |  | STARD4   |
|  |  |  |  |  | STARD5   |
|  |  |  |  |  | STAT3    |
|  |  |  |  |  | STC2     |
|  |  |  |  |  | STEAP1   |
|  |  |  |  |  | STEAP2   |
|  |  |  |  |  | STIP1    |
|  |  |  |  |  | STK19    |
|  |  |  |  |  | STK25    |
|  |  |  |  |  | STK32A   |
|  |  |  |  |  | STRA6    |
|  |  |  |  |  | STRADB   |
|  |  |  |  |  | STT3B    |
|  |  |  |  |  | STX11    |
|  |  |  |  |  | STX17    |
|  |  |  |  |  | STX3     |
|  |  |  |  |  | STX7     |
|  |  |  |  |  | STX8     |
|  |  |  |  |  | SUGP2    |
|  |  |  |  |  | SULT1C2  |
|  |  |  |  |  | SUMO1    |
|  |  |  |  |  | SUN2     |
|  |  |  |  |  | SUPT3H   |
|  |  |  |  |  | Supt4b   |

|  |  |  |  |          |
|--|--|--|--|----------|
|  |  |  |  | SUPT6H   |
|  |  |  |  | SVEP1    |
|  |  |  |  | SYAP1    |
|  |  |  |  | SYF2     |
|  |  |  |  | SYNE4    |
|  |  |  |  | SYNJ2    |
|  |  |  |  | SYNJ2BP  |
|  |  |  |  | SYNM     |
|  |  |  |  | SYPL1    |
|  |  |  |  | SYTL2    |
|  |  |  |  | SYTL3    |
|  |  |  |  | SYVN1    |
|  |  |  |  | SZRD1    |
|  |  |  |  | TAF10    |
|  |  |  |  | TAF7     |
|  |  |  |  | TANGO2   |
|  |  |  |  | TANK     |
|  |  |  |  | TAOK1    |
|  |  |  |  | TAPBP    |
|  |  |  |  | TARS     |
|  |  |  |  | Tas2r143 |
|  |  |  |  | TATDN3   |
|  |  |  |  | TAZ      |
|  |  |  |  | TBC1D10B |
|  |  |  |  | TBC1D2B  |
|  |  |  |  | TBC1D7   |
|  |  |  |  | TBCB     |
|  |  |  |  | TBCD     |
|  |  |  |  | TBL1X    |
|  |  |  |  | TBL1XR1  |
|  |  |  |  | TBRG1    |
|  |  |  |  | TCF20    |
|  |  |  |  | TCF3     |
|  |  |  |  | TCIRG1   |
|  |  |  |  | TCN2     |
|  |  |  |  | TCOF1    |
|  |  |  |  | TEAD2    |
|  |  |  |  | TECPR2   |
|  |  |  |  | TERF2    |
|  |  |  |  | TES      |
|  |  |  |  | TFAM     |
|  |  |  |  | TFAP2B   |
|  |  |  |  | TFAP2C   |
|  |  |  |  | TFPT     |

|  |  |  |  |  |          |
|--|--|--|--|--|----------|
|  |  |  |  |  | TGFB1I1  |
|  |  |  |  |  | TGFB2    |
|  |  |  |  |  | TGFBR1   |
|  |  |  |  |  | TGFBR2   |
|  |  |  |  |  | TGS1     |
|  |  |  |  |  | THAP4    |
|  |  |  |  |  | THBS2    |
|  |  |  |  |  | THNSL2   |
|  |  |  |  |  | THOC7    |
|  |  |  |  |  | THOP1    |
|  |  |  |  |  | THSD4    |
|  |  |  |  |  | THTPA    |
|  |  |  |  |  | TIA1     |
|  |  |  |  |  | Timd2    |
|  |  |  |  |  | TIMM10B  |
|  |  |  |  |  | TIMMDC1  |
|  |  |  |  |  | TIMP2    |
|  |  |  |  |  | TLCD2    |
|  |  |  |  |  | Tlr13    |
|  |  |  |  |  | TLR7     |
|  |  |  |  |  | TM6SF1   |
|  |  |  |  |  | TMC7     |
|  |  |  |  |  | TMCO1    |
|  |  |  |  |  | TMED10   |
|  |  |  |  |  | TMED4    |
|  |  |  |  |  | TMEM127  |
|  |  |  |  |  | TMEM139  |
|  |  |  |  |  | TMEM154  |
|  |  |  |  |  | TMEM167A |
|  |  |  |  |  | TMEM176A |
|  |  |  |  |  | TMEM181  |
|  |  |  |  |  | TMEM209  |
|  |  |  |  |  | Tmem223  |
|  |  |  |  |  | TMEM229B |
|  |  |  |  |  | TMEM237  |
|  |  |  |  |  | TMEM255B |
|  |  |  |  |  | TMEM260  |
|  |  |  |  |  | TMEM261  |
|  |  |  |  |  | TMEM68   |
|  |  |  |  |  | TMEM8A   |
|  |  |  |  |  | TMEM9    |
|  |  |  |  |  | TMPO     |
|  |  |  |  |  | TNC      |
|  |  |  |  |  | TNFAIP2  |

|  |  |  |  |  |           |
|--|--|--|--|--|-----------|
|  |  |  |  |  | TNFAIP8L2 |
|  |  |  |  |  | TNFRSF9   |
|  |  |  |  |  | TNIK      |
|  |  |  |  |  | TNNC2     |
|  |  |  |  |  | TNS1      |
|  |  |  |  |  | TNS3      |
|  |  |  |  |  | TOMM40    |
|  |  |  |  |  | TOMM6     |
|  |  |  |  |  | TOP1MT    |
|  |  |  |  |  | TOR1AIP1  |
|  |  |  |  |  | TOR1AIP2  |
|  |  |  |  |  | TP53INP1  |
|  |  |  |  |  | TP53INP2  |
|  |  |  |  |  | TPK1      |
|  |  |  |  |  | Tpm2      |
|  |  |  |  |  | TPR       |
|  |  |  |  |  | TPRG1L    |
|  |  |  |  |  | TRAF1     |
|  |  |  |  |  | TRAF3IP2  |
|  |  |  |  |  | TRAF4     |
|  |  |  |  |  | TRAF6     |
|  |  |  |  |  | TRAF7     |
|  |  |  |  |  | TRAM1     |
|  |  |  |  |  | TRAP1     |
|  |  |  |  |  | TRAPPC1   |
|  |  |  |  |  | TRAPPC2L  |
|  |  |  |  |  | Trdv2-2   |
|  |  |  |  |  | TREM2     |
|  |  |  |  |  | TRIB3     |
|  |  |  |  |  | TRIM10    |
|  |  |  |  |  | TRIM11    |
|  |  |  |  |  | TRIM15    |
|  |  |  |  |  | TRIM27    |
|  |  |  |  |  | TRIM36    |
|  |  |  |  |  | TRIM40    |
|  |  |  |  |  | TRIO      |
|  |  |  |  |  | TRIP12    |
|  |  |  |  |  | TRMT2B    |
|  |  |  |  |  | TRPM6     |
|  |  |  |  |  | TSC22D2   |
|  |  |  |  |  | TSEN2     |
|  |  |  |  |  | TSN       |
|  |  |  |  |  | TSPAN1    |
|  |  |  |  |  | TSPAN8    |

|  |  |  |  |  |         |
|--|--|--|--|--|---------|
|  |  |  |  |  | TSR1    |
|  |  |  |  |  | TTC1    |
|  |  |  |  |  | TTC33   |
|  |  |  |  |  | Ttc41   |
|  |  |  |  |  | TTYH3   |
|  |  |  |  |  | TUBA3E  |
|  |  |  |  |  | TUBB2B  |
|  |  |  |  |  | TWISTNB |
|  |  |  |  |  | TWSG1   |
|  |  |  |  |  | TXN2    |
|  |  |  |  |  | TXNL4A  |
|  |  |  |  |  | TYROBP  |
|  |  |  |  |  | U2SURP  |
|  |  |  |  |  | UAP1L1  |
|  |  |  |  |  | UBE2A   |
|  |  |  |  |  | UBE2G1  |
|  |  |  |  |  | UBE2Q1  |
|  |  |  |  |  | UBFD1   |
|  |  |  |  |  | UBL5    |
|  |  |  |  |  | UBOX5   |
|  |  |  |  |  | UBQLN1  |
|  |  |  |  |  | UBTF    |
|  |  |  |  |  | UCK2    |
|  |  |  |  |  | UCMA    |
|  |  |  |  |  | UGT1A6  |
|  |  |  |  |  | UHRF2   |
|  |  |  |  |  | ULK1    |
|  |  |  |  |  | ULK2    |
|  |  |  |  |  | Umad1   |
|  |  |  |  |  | UMPS    |
|  |  |  |  |  | UNC5A   |
|  |  |  |  |  | UNG     |
|  |  |  |  |  | Uox     |
|  |  |  |  |  | UPF1    |
|  |  |  |  |  | UPF2    |
|  |  |  |  |  | UPK3BL  |
|  |  |  |  |  | UQCRC1  |
|  |  |  |  |  | USP10   |
|  |  |  |  |  | USP48   |
|  |  |  |  |  | VAMP7   |
|  |  |  |  |  | VAMP8   |
|  |  |  |  |  | VANGL2  |
|  |  |  |  |  | VAPA    |
|  |  |  |  |  | VARS2   |

|  |  |  |  |  |          |
|--|--|--|--|--|----------|
|  |  |  |  |  | VAT1     |
|  |  |  |  |  | VAV1     |
|  |  |  |  |  | VAV2     |
|  |  |  |  |  | VCP      |
|  |  |  |  |  | VEZT     |
|  |  |  |  |  | VILL     |
|  |  |  |  |  | VLDLR    |
|  |  |  |  |  | Vmn1r214 |
|  |  |  |  |  | VMP1     |
|  |  |  |  |  | VPS13A   |
|  |  |  |  |  | VPS13B   |
|  |  |  |  |  | VPS28    |
|  |  |  |  |  | VPS33A   |
|  |  |  |  |  | VPS33B   |
|  |  |  |  |  | VPS54    |
|  |  |  |  |  | VPS9D1   |
|  |  |  |  |  | VRK1     |
|  |  |  |  |  | VSIG10   |
|  |  |  |  |  | VTCN1    |
|  |  |  |  |  | VTI1B    |
|  |  |  |  |  | VWA8     |
|  |  |  |  |  | WARS     |
|  |  |  |  |  | WARS2    |
|  |  |  |  |  | WAS      |
|  |  |  |  |  | WASHC4   |
|  |  |  |  |  | WBP1     |
|  |  |  |  |  | WBP4     |
|  |  |  |  |  | WBSCR17  |
|  |  |  |  |  | WDR20    |
|  |  |  |  |  | WDR4     |
|  |  |  |  |  | WDR46    |
|  |  |  |  |  | WDR73    |
|  |  |  |  |  | WDYHV1   |
|  |  |  |  |  | Wfdc10   |
|  |  |  |  |  | Wfdc18   |
|  |  |  |  |  | WLS      |
|  |  |  |  |  | WNK2     |
|  |  |  |  |  | WNT16    |
|  |  |  |  |  | WNT7B    |
|  |  |  |  |  | WSB1     |
|  |  |  |  |  | WSB2     |
|  |  |  |  |  | WWP1     |
|  |  |  |  |  | XBP1     |
|  |  |  |  |  | XIST     |

|  |  |  |  |         |
|--|--|--|--|---------|
|  |  |  |  | XPC     |
|  |  |  |  | YBX1    |
|  |  |  |  | YDJC    |
|  |  |  |  | YEATS4  |
|  |  |  |  | YIF1A   |
|  |  |  |  | YIF1B   |
|  |  |  |  | YIPF2   |
|  |  |  |  | YIPF4   |
|  |  |  |  | YPEL5   |
|  |  |  |  | YTHDF3  |
|  |  |  |  | YWHAB   |
|  |  |  |  | YWHAG   |
|  |  |  |  | YWHAH   |
|  |  |  |  | ZBTB18  |
|  |  |  |  | ZBTB24  |
|  |  |  |  | ZBTB7A  |
|  |  |  |  | ZC2HC1B |
|  |  |  |  | ZC3H10  |
|  |  |  |  | ZC3H12A |
|  |  |  |  | ZC3HC1  |
|  |  |  |  | ZCCHC17 |
|  |  |  |  | ZCCHC4  |
|  |  |  |  | ZCCHC6  |
|  |  |  |  | ZCRB1   |
|  |  |  |  | ZDHHC15 |
|  |  |  |  | ZEB2    |
|  |  |  |  | ZER1    |
|  |  |  |  | ZFAND6  |
|  |  |  |  | ZFC3H1  |
|  |  |  |  | ZFP28   |
|  |  |  |  | ZFP36L1 |
|  |  |  |  | Zfp60   |
|  |  |  |  | Zfp658  |
|  |  |  |  | Zfp763  |
|  |  |  |  | Zfp810  |
|  |  |  |  | Zfp87   |
|  |  |  |  | Zfp871  |
|  |  |  |  | Zfp950  |
|  |  |  |  | ZGPAT   |
|  |  |  |  | ZGRF1   |
|  |  |  |  | ZMAT1   |
|  |  |  |  | ZNF236  |
|  |  |  |  | ZNF326  |
|  |  |  |  | ZNF329  |

|  |  |  |  |  |               |
|--|--|--|--|--|---------------|
|  |  |  |  |  | ZNF428        |
|  |  |  |  |  | ZNF436        |
|  |  |  |  |  | ZNF445        |
|  |  |  |  |  | ZNF519        |
|  |  |  |  |  | ZNF777        |
|  |  |  |  |  | ZNF787        |
|  |  |  |  |  | ZNF8          |
|  |  |  |  |  | ZRSR2         |
|  |  |  |  |  | ZW10          |
|  |  |  |  |  | 1700027J07Rik |
|  |  |  |  |  | 1700042G07Rik |
|  |  |  |  |  | 1700109H08Rik |
|  |  |  |  |  | 1700120B22Rik |
|  |  |  |  |  | 1810009N02Rik |
|  |  |  |  |  | 1810032O08Rik |
|  |  |  |  |  | 1810037I17Rik |
|  |  |  |  |  | 2210407C18Rik |
|  |  |  |  |  | 2310039H08Rik |
|  |  |  |  |  | 2700033N17Rik |
|  |  |  |  |  | 2700097O09Rik |
|  |  |  |  |  | 4921501E09Rik |
|  |  |  |  |  | 4930528A17Rik |
|  |  |  |  |  | 4933427G23Rik |
|  |  |  |  |  | 5033430I15Rik |
|  |  |  |  |  | 6820431F20Rik |
|  |  |  |  |  | 9130230L23Rik |



**Supplementary Table S8. The list of genes overlapping between DEGs in the hippocampus of rats prenatally exposed to BPA and the lists of BPA-responsive genes identified by the reanalysis of previously published transcriptome profiling studies in NCBI GEO DataSets database.**

| Overlap with       | GSE44387 | GSE63852 | GSE58642   | GSE50527 | GSE58516 | GSE86923      |  | Combined lists |
|--------------------|----------|----------|------------|----------|----------|---------------|--|----------------|
| DEGs in both sexes | ABCB9    | ABCA4    | CSGALNACT1 | ADAMTS17 | NARFL    | 2310039H08Rik |  | ABCB9          |
|                    | ACAA2    | ABHD14A  | FRYL       | AGAP1    | PIGH     | AAGAB         |  | ACAA2          |
|                    | ACACB    | ABL2     | HS3ST3A1   | AGK      | SIDT1    | AARD          |  | ACACB          |
|                    | ACLY     | ACSS3    | LGR5       | AGL      | STRADA   | AATF          |  | ACLY           |
|                    | ACSL1    | ADORA2B  | LPL        | ALAD     | TMEM185A | ABCA7         |  | ACSL1          |
|                    | ADAMTS4  | AGA      |            | ALG12    | ZNF212   | ABCB8         |  | ADAMTS4        |
|                    | ADTRP    | AIFM1    |            | ALOXE3   |          | ABHD6         |  | ADTRP          |
|                    | AGL      | ALDH18A1 |            | ARHGAP25 |          | ACAA2         |  | AGL            |
|                    | AK1      | ALDH5A1  |            | ARRDC2   |          | ACADVL        |  | AK1            |
|                    | AKR1A1   | ASL      |            | ATP1A4   |          | ACP2          |  | AKR1A1         |
|                    | ALDH16A1 | ATF6B    |            | ATP2A2   |          | ADA           |  | ALDH16A1       |
|                    | ALDOA    | ATP2B3   |            | B4GALNT3 |          | ADGRG2        |  | ALDOA          |
|                    | APMAP    | ATXN2    |            | BAAT     |          | AGTR1         |  | APMAP          |
|                    | APOE     | BHLHA15  |            | BCOR     |          | AHCYL2        |  | APOE           |
|                    | ARHGEF25 | BMP3     |            | BOD1     |          | AIDA          |  | ARHGEF25       |
|                    | ARIH2    | BUB1B    |            | C18orf25 |          | AIF1L         |  | ARIH2          |
|                    | ASL      | C1QBP    |            | C1orf43  |          | AKR1A1        |  | ASL            |
|                    | ASTN1    | CALR     |            | C1QTNF1  |          | Akr1c13       |  | ASTN1          |
|                    | ATG101   | CAPSL    |            | C1R      |          | ALOX5         |  | ATG101         |
|                    | ATP6V0A1 | CCDC43   |            | C2orf70  |          | AMBRA1        |  | ATP6V0A1       |
|                    | ATXN2    | CDC42EP3 |            | CACNA1G  |          | ANKRD11       |  | ATXN2          |
|                    | BAD      | CDH15    |            | CACTIN   |          | ANKS6         |  | BAD            |
|                    | BCL2L2   | CLSTN2   |            | CAPNS2   |          | AP4M1         |  | BCL2L2         |
|                    | BFAR     | CMTR1    |            | CATSPER2 |          | APBB1IP       |  | BFAR           |
|                    | BORCS8   | COL5A2   |            | CBLN3    |          | APEH          |  | BORCS8         |
|                    | BPGM     | CTNBL1   |            | CBX7     |          | AQR           |  | BPGM           |
|                    | C11orf54 | DDX6     |            | CCDC103  |          | ARG1          |  | C11orf54       |
|                    | C22orf23 | EPC1     |            | CCDC113  |          | ARSA          |  | C22orf23       |
|                    | C3orf14  | ETHE1    |            | CCDC153  |          | ASNS          |  | C3orf14        |
|                    | CCDC167  | EXO1     |            | CCDC167  |          | ASPH          |  | CCDC167        |
|                    | CCDC81   | FASLG    |            | CCER2    |          | ATF4          |  | CCDC81         |
|                    | CDHR4    | FDFT1    |            | CD79B    |          | ATIC          |  | CDHR4          |
|                    | CHID1    | FER      |            | CDC25B   |          | ATP2A1        |  | CHID1          |
|                    | CHPT1    | GGCT     |            | CDC6     |          | ATP2B2        |  | CHPT1          |
|                    | CHRDL1   | GOT1     |            | CDKL2    |          | ATP6AP1       |  | CHRDL1         |
|                    | CHRNA4   | HEXIM1   |            | CERS6    |          | ATXN1         |  | CHRNA4         |
|                    | CIAO1    | HNRNPC   |            | CHD7     |          | AVEN          |  | CIAO1          |
|                    | CIC      | IL27RA   |            | CHKA     |          | B3GALNT1      |  | CIC            |
|                    | CLEC16A  | IVD      |            | CHST9    |          | B4GALT3       |  | CLEC16A        |
|                    | CMPK2    | KCNA2    |            | COL9A1   |          | BAP1          |  | CMPK2          |
|                    | COA7     | MAP3K4   |            | CPNE7    |          | BHLHA15       |  | COA7           |
|                    | COG2     | MBD2     |            | CROT     |          | BMS1          |  | COG2           |
|                    | CPTP     | MTMR2    |            | CTDSPL2  |          | BNC2          |  | CPTP           |
|                    | CSDE1    | MYLIP    |            | CUX1     |          | BTA1F1        |  | CSDE1          |
|                    | CSF2RB   | MYO9B    |            | CYTH1    |          | BTD           |  | CSF2RB         |
|                    | CTBS     | NFKBIB   |            | DACT1    |          | BTK           |  | CTBS           |
|                    | CTSB     | NIT1     |            | DGAT1    |          | C11orf98      |  | CTSB           |
|                    | CYHR1    | PDE7B    |            | DKK2     |          | C12orf49      |  | CYHR1          |

|  |          |         |  |           |  |          |  |          |
|--|----------|---------|--|-----------|--|----------|--|----------|
|  | CYP1B1   | PIAS1   |  | EBI3      |  | C1QB     |  | CYP1B1   |
|  | CYP2J2   | PIN1    |  | EFEMP1    |  | C20orf24 |  | CYP2J2   |
|  | DCAF5    | PLA2R1  |  | EHD2      |  | C3orf14  |  | DCAF5    |
|  | DDX27    | PLXNA3  |  | EIF4ENIF1 |  | C5orf22  |  | DDX27    |
|  | DENND2D  | PNOC    |  | ELMO1     |  | CA13     |  | DENND2D  |
|  | DGAT1    | POLA2   |  | EPC2      |  | CACNA1G  |  | DGAT1    |
|  | DSTYK    | PPM1E   |  | EPSTI1    |  | CACNB2   |  | DSTYK    |
|  | EAPP     | PRKAG1  |  | ERC1      |  | CACTIN   |  | EAPP     |
|  | ECHDC2   | PRKDC   |  | ETFB      |  | CADPS2   |  | ECHDC2   |
|  | EHD2     | RFXANK  |  | EYA2      |  | CCDC3    |  | EHD2     |
|  | EIF4EBP2 | RGN     |  | FAM110B   |  | Ccl7     |  | EIF4EBP2 |
|  | EIF4G1   | RNF41   |  | FAM120B   |  | CCND1    |  | EIF4G1   |
|  | EMC9     | RRH     |  | FAM151A   |  | CD47     |  | EMC9     |
|  | EPB41L2  | SCP2    |  | FAM69C    |  | Cd52     |  | EPB41L2  |
|  | ETFB     | SCTR    |  | FAT1      |  | CD84     |  | ETFB     |
|  | ETNK1    | SLC11A2 |  | FDX1      |  | CD86     |  | ETNK1    |
|  | EXOSC10  | SLC35B2 |  | FERMT2    |  | CDC25B   |  | EXOSC10  |
|  | FADS1    | SLCO3A1 |  | FRMD4B    |  | CDK2     |  | FADS1    |
|  | FAM114A2 | SMAD4   |  | FSD2      |  | CDK5RAP1 |  | FAM114A2 |
|  | FAM193A  | SMTN    |  | GABPB1    |  | CEBPE    |  | FAM193A  |
|  | FARSA    | SMYD3   |  | GBP2      |  | CFB      |  | FARSA    |
|  | FERMT2   | SUCLG1  |  | GFRA4     |  | CHD2     |  | FERMT2   |
|  | FKBP15   | SUN2    |  | GLT8D1    |  | CHD7     |  | FKBP15   |
|  | FLAD1    | TBC1D9B |  | GNB1L     |  | CHD9     |  | FLAD1    |
|  | FLII     | TCTE1   |  | GPC6      |  | CHKA     |  | FLII     |
|  | FN3KRP   | TEKT1   |  | GPR108    |  | CLEC7A   |  | FN3KRP   |
|  | FNBP1    | TIMM9   |  | GRHPR     |  | CLPP     |  | FNBP1    |
|  | FNBP4    | TPI1    |  | GRIK1     |  | CLUH     |  | FNBP4    |
|  | GALM     | TPK1    |  | GRIN2A    |  | CMA1     |  | GALM     |
|  | GHR      | UBE2G2  |  | GSAP      |  | CNDP1    |  | GHR      |
|  | GLUD1    | UBR2    |  | GULP1     |  | CNST     |  | GLUD1    |
|  | GPD2     | VIP     |  | HCFC1R1   |  | COG3     |  | GPD2     |
|  | GPN1     | VNN1    |  | HIC2      |  | COL6A2   |  | GPN1     |
|  | GPR146   | WDR1    |  | HLA-A     |  | CP       |  | GPR146   |
|  | GPRC5B   | XPA     |  | HMG20B    |  | CPE      |  | GPRC5B   |
|  | GRAMD1B  | ZNF235  |  | HPS3      |  | CPNE4    |  | GRAMD1B  |
|  | GRB10    |         |  | HSD11B1   |  | CREB3L2  |  | GRB10    |
|  | GSN      |         |  | HSF2BP    |  | CRELD1   |  | GSN      |
|  | GSS      |         |  | HSPB6     |  | CRELD2   |  | GSS      |
|  | GTF3A    |         |  | HSPH1     |  | Cux1     |  | GTF3A    |
|  | GZF1     |         |  | IL12RB2   |  | CYHR1    |  | GZF1     |
|  | HIBCH    |         |  | IL1RL1    |  | CYP39A1  |  | HIBCH    |
|  | HIP1     |         |  | IL23A     |  | DAO      |  | HIP1     |
|  | HLA-A    |         |  | ILDR2     |  | DCP1A    |  | HLA-A    |
|  | HMG20A   |         |  | IRX2      |  | DDIT3    |  | HMG20A   |
|  | HSD17B4  |         |  | KAT14     |  | DDX24    |  | HSD17B4  |
|  | HSPA4L   |         |  | KCNAB1    |  | DDX6     |  | HSPA4L   |
|  | IDUA     |         |  | KCNJ12    |  | DEPTOR   |  | IDUA     |
|  | IFT81    |         |  | KCNT2     |  | DGKG     |  | IFT81    |
|  | ILVBL    |         |  | KCP       |  | DHX37    |  | ILVBL    |
|  | INO80    |         |  | KCTD14    |  | DLEU7    |  | INO80    |
|  | ITGA5    |         |  | KIAA1755  |  | DNAJB6   |  | ITGA5    |
|  | ITGB3    |         |  | KIF1BP    |  | DNAJC13  |  | ITGB3    |

|  |          |  |  |         |  |            |  |          |
|--|----------|--|--|---------|--|------------|--|----------|
|  | JMJD8    |  |  | KLHDC2  |  | DOCK4      |  | JMJD8    |
|  | KAT14    |  |  | KMT2C   |  | DOK3       |  | KAT14    |
|  | KCNJ3    |  |  | L3MBTL3 |  | DPYSL2     |  | KCNJ3    |
|  | KDSR     |  |  | LAMP3   |  | Dync1i2    |  | KDSR     |
|  | KHDRBS2  |  |  | LATS1   |  | EDN1       |  | KHDRBS2  |
|  | KIAA0100 |  |  | LBH     |  | EDNRB      |  | KIAA0100 |
|  | KLC4     |  |  | LLPH    |  | EED        |  | KLC4     |
|  | KLHL25   |  |  | LRRC57  |  | EEF1D      |  | KLHL25   |
|  | KMT5B    |  |  | LRRC61  |  | EIF3B      |  | KMT5B    |
|  | L3MBTL3  |  |  | LYNX1   |  | EIF4G1     |  | L3MBTL3  |
|  | LACTB    |  |  | MAN2B2  |  | EMD        |  | LACTB    |
|  | LAMC1    |  |  | MANEA   |  | EMILIN1    |  | LAMC1    |
|  | LDLR     |  |  | MAP2K5  |  | ENG        |  | LDLR     |
|  | LDLRAP1  |  |  | MAP3K4  |  | EPRS       |  | LDLRAP1  |
|  | LEP      |  |  | MAPK11  |  | EXOC1      |  | LEP      |
|  | LMNB2    |  |  | MBD2    |  | EXOSC7     |  | LMNB2    |
|  | MAP2K5   |  |  | MBD5    |  | EXOSC8     |  | MAP2K5   |
|  | MARS     |  |  | MED24   |  | F2RL1      |  | MARS     |
|  | MED22    |  |  | METTL23 |  | FAHD2B     |  | MED22    |
|  | MEGF9    |  |  | MLC1    |  | FAM110B    |  | MEGF9    |
|  | MFSD4B   |  |  | MPZL2   |  | FAM114A2   |  | MFSD4B   |
|  | MKRN2    |  |  | MRPL42  |  | FAM118B    |  | MKRN2    |
|  | MLX      |  |  | MRPS21  |  | FAM8A1     |  | MLX      |
|  | MRPL20   |  |  | MRPS7   |  | FBLN1      |  | MRPL20   |
|  | MRPS16   |  |  | MTRR    |  | FCGR2A     |  | MRPS16   |
|  | MVP      |  |  | MXD1    |  | FGFRL1     |  | MVP      |
|  | MYLIP    |  |  | MYBPH   |  | FRMD4B     |  | MYLIP    |
|  | MYNN     |  |  | MYH6    |  | G3BP1      |  | MYNN     |
|  | MYSM1    |  |  | MYO1C   |  | GADD45GIP1 |  | MYSM1    |
|  | NAA25    |  |  | NCOR1   |  | GALT       |  | NAA25    |
|  | NAA30    |  |  | NDUFAF7 |  | Gar1       |  | NAA30    |
|  | NAGK     |  |  | NEK3    |  | GART       |  | NAGK     |
|  | NAPRT    |  |  | NEPRO   |  | GATA6      |  | NAPRT    |
|  | NCF1     |  |  | NFKB2   |  | GBF1       |  | NCF1     |
|  | NCOR1    |  |  | NFX1    |  | GCNT2      |  | NCOR1    |
|  | NDRG2    |  |  | NME6    |  | GGCT       |  | NDRG2    |
|  | NEDD8    |  |  | NPB     |  | GIN1       |  | NEDD8    |
|  | OGFOD2   |  |  | NPL     |  | GKAP1      |  | OGFOD2   |
|  | OLR1     |  |  | NR5A2   |  | GLRB       |  | OLR1     |
|  | OSMR     |  |  | NTM     |  | GLUD1      |  | OSMR     |
|  | OXSM     |  |  | NTNG1   |  | GNL3L      |  | OXSM     |
|  | PDPR     |  |  | NUB1    |  | GORASP2    |  | PDPR     |
|  | PER1     |  |  | NUP54   |  | GPAT4      |  | PER1     |
|  | PER2     |  |  | NVL     |  | GPATCH4    |  | PER2     |
|  | PHF20L1  |  |  | OGDH    |  | Gprasp2    |  | PHF20L1  |
|  | PIK3C3   |  |  | OLFM4   |  | GRAMD1B    |  | PIK3C3   |
|  | PLCB4    |  |  | OLR1    |  | GSTP1      |  | PLCB4    |
|  | PLPP3    |  |  | OSER1   |  | H2AFZ      |  | PLPP3    |
|  | PON2     |  |  | PAICS   |  | HCFC2      |  | PON2     |
|  | PPA1     |  |  | PARP9   |  | HEXA       |  | PPA1     |
|  | PPAT     |  |  | PCDHA7  |  | HIGD2A     |  | PPAT     |
|  | PPM1H    |  |  | PDE7B   |  | HLA-A      |  | PPM1H    |
|  | PQLC1    |  |  | PHIP    |  | HLA-DQA1   |  | PQLC1    |

|  |           |  |  |         |  |          |  |           |
|--|-----------|--|--|---------|--|----------|--|-----------|
|  | PRKD3     |  |  | PLAA    |  | HNRNPC   |  | PRKD3     |
|  | PSMD13    |  |  | PLAT    |  | HOPX     |  | PSMD13    |
|  | PTGR2     |  |  | PLEKHG1 |  | HP1BP3   |  | PTGR2     |
|  | PTS       |  |  | PLPP3   |  | HSP90B1  |  | PTS       |
|  | PXMP2     |  |  | POMC    |  | HSPA2    |  | PXMP2     |
|  | RAB3GAP2  |  |  | POMT1   |  | HSPA8    |  | RAB3GAP2  |
|  | RAE1      |  |  | PPA2    |  | HSPB1    |  | RAE1      |
|  | RAF1      |  |  | PPIP5K1 |  | HSPD1    |  | RAF1      |
|  | RASSF8    |  |  | PRR22   |  | HSPH1    |  | RASSF8    |
|  | REPS2     |  |  | PRR30   |  | ICE1     |  | REPS2     |
|  | RGS2      |  |  | PTGDR   |  | IDH1     |  | RGS2      |
|  | RNF114    |  |  | PTGER3  |  | IFT81    |  | RNF114    |
|  | RNF146    |  |  | PTGFRN  |  | IGFBP4   |  | RNF146    |
|  | RNF19A    |  |  | PTGIS   |  | IGSF3    |  | RNF19A    |
|  | RNH1      |  |  | PTPN22  |  | ILVBL    |  | RNH1      |
|  | RPAP1     |  |  | RAB27A  |  | IMP3     |  | RPAP1     |
|  | S100A4    |  |  | RABGGTB |  | ING3     |  | S100A4    |
|  | SAFB2     |  |  | RBM46   |  | INO80    |  | SAFB2     |
|  | SAP130    |  |  | RCHY1   |  | INSR     |  | SAP130    |
|  | SBNO2     |  |  | REPS2   |  | IP6K1    |  | SBNO2     |
|  | SCAF4     |  |  | RET     |  | IPMK     |  | SCAF4     |
|  | SCARB1    |  |  | RIOK1   |  | ITGB8    |  | SCARB1    |
|  | SCLY      |  |  | RPS6KC1 |  | IVD      |  | SCLY      |
|  | SCRN3     |  |  | RUFY2   |  | KCNA2    |  | SCRN3     |
|  | SFI1      |  |  | SAMD12  |  | KCNAB1   |  | SFI1      |
|  | SLC25A44  |  |  | SCARB1  |  | KCTD1    |  | SLC25A44  |
|  | SLC39A11  |  |  | SCFD2   |  | KDM5B    |  | SLC39A11  |
|  | SLFN13    |  |  | SCRN1   |  | KDSR     |  | SLFN13    |
|  | SMAD5     |  |  | SELENOF |  | KIAA1551 |  | SMAD5     |
|  | SMPD1     |  |  | SEMA5A  |  | KIF3B    |  | SMPD1     |
|  | SMTN      |  |  | SERTAD2 |  | KIF3C    |  | SMTN      |
|  | SMYD4     |  |  | SESN1   |  | KLHL25   |  | SMYD4     |
|  | SND1      |  |  | SFXN4   |  | KLHL5    |  | SND1      |
|  | SOD2      |  |  | SH3GL2  |  | LARS     |  | SOD2      |
|  | SORBS1    |  |  | SIDT1   |  | LBH      |  | SORBS1    |
|  | SPATA2    |  |  | SLAIN1  |  | LDLR     |  | SPATA2    |
|  | Srrm1     |  |  | SLC12A5 |  | LIAS     |  | Srrm1     |
|  | ST6GAL2   |  |  | SLC24A4 |  | LIF      |  | ST6GAL2   |
|  | STIM2     |  |  | SLC35B1 |  | LMNB2    |  | STIM2     |
|  | STK17B    |  |  | SLC43A3 |  | LOXL3    |  | STK17B    |
|  | STX1A     |  |  | SLC47A1 |  | LPIN2    |  | STX1A     |
|  | STXBP4    |  |  | SLC4A1  |  | LRP2     |  | STXBP4    |
|  | SYNGR1    |  |  | SLFN13  |  | LY6G6D   |  | SYNGR1    |
|  | TGS1      |  |  | SMAD4   |  | Lypd2    |  | TGS1      |
|  | TIMM9     |  |  | SORBS1  |  | MAN2B2   |  | TIMM9     |
|  | TKT       |  |  | SOX17   |  | MAN2C1   |  | TKT       |
|  | TLR3      |  |  | SP140   |  | MANBA    |  | TLR3      |
|  | TMC7      |  |  | SPARCL1 |  | MAP7     |  | TMC7      |
|  | TMEM206   |  |  | SRGAP2  |  | MAPKAP1  |  | TMEM206   |
|  | TNFRSF10A |  |  | STRADA  |  | MBD5     |  | TNFRSF10A |
|  | TPD52L2   |  |  | STRADB  |  | MBTD1    |  | TPD52L2   |
|  | TRAIP     |  |  | SYNC    |  | MED1     |  | TRAIP     |
|  | TRNT1     |  |  | SYNPO2  |  | MID2     |  | TRNT1     |

|  |        |  |  |          |  |           |  |          |
|--|--------|--|--|----------|--|-----------|--|----------|
|  | TTC38  |  |  | SYPL2    |  | MKNK1     |  | TTC38    |
|  | Ttf1   |  |  | TANC2    |  | MLEC      |  | Ttf1     |
|  | UBQLN1 |  |  | TCF25    |  | MMP11     |  | UBQLN1   |
|  | UBXN4  |  |  | TCFL5    |  | MOSPD1    |  | UBXN4    |
|  | UQCC1  |  |  | TECPR2   |  | MRE11     |  | UQCC1    |
|  | UQCC3  |  |  | TERF2    |  | MRPL28    |  | UQCC3    |
|  | UROD   |  |  | TET3     |  | MRPS9     |  | UROD     |
|  | UTP6   |  |  | TFPI     |  | MSMO1     |  | UTP6     |
|  | VASP   |  |  | TINAG    |  | MTHFD2    |  | VASP     |
|  | VEGFB  |  |  | TKFC     |  | MTX1      |  | VEGFB    |
|  | VPS13C |  |  | TLDC1    |  | MYBBP1A   |  | VPS13C   |
|  | WDR41  |  |  | TMEM126B |  | MYO1F     |  | WDR41    |
|  | WDR53  |  |  | TMEM255A |  | MYO9B     |  | WDR53    |
|  | WNK1   |  |  | TMEM44   |  | MYOF      |  | WNK1     |
|  | YKT6   |  |  | TMEM59   |  | N4BP2L1   |  | YKT6     |
|  | ZBTB16 |  |  | TNFSF4   |  | NAA10     |  | ZBTB16   |
|  | ZNF106 |  |  | TRADD    |  | NADK      |  | ZNF106   |
|  | ZNF330 |  |  | TRIM37   |  | NCAPG2    |  | ZNF330   |
|  | ZNF560 |  |  | TRIM62   |  | NCEH1     |  | ZNF560   |
|  | ZNF775 |  |  | TTC30B   |  | NDOR1     |  | ZNF775   |
|  | ZNRF2  |  |  | TTC38    |  | NEU1      |  | ZNRF2    |
|  |        |  |  | TXN      |  | NEURL2    |  | ABCA4    |
|  |        |  |  | UAP1L1   |  | NFE2      |  | ABHD14A  |
|  |        |  |  | UBA7     |  | NFKB2     |  | ABL2     |
|  |        |  |  | USP24    |  | NHP2      |  | ACSS3    |
|  |        |  |  | USP4     |  | NIPBL     |  | ADORA2B  |
|  |        |  |  | VDR      |  | NIPSNAP3A |  | AGA      |
|  |        |  |  | WAC      |  | NME7      |  | AIFM1    |
|  |        |  |  | WDR33    |  | NMRAL1    |  | ALDH18A1 |
|  |        |  |  | WDR83    |  | NOC2L     |  | ALDH5A1  |
|  |        |  |  | XKRX     |  | NOL6      |  | ATF6B    |
|  |        |  |  | XYLT1    |  | NOP14     |  | ATP2B3   |
|  |        |  |  | YIPF2    |  | NPHP4     |  | BHLHA15  |
|  |        |  |  | YKT6     |  | NR1I3     |  | BMP3     |
|  |        |  |  | ZBBX     |  | NR5A2     |  | BUB1B    |
|  |        |  |  | ZCCHC18  |  | NSDHL     |  | C1QBP    |
|  |        |  |  | ZFR2     |  | NXT2      |  | CALR     |
|  |        |  |  | ZGPAT    |  | ODC1      |  | CAPSL    |
|  |        |  |  | ZNF131   |  | OGFRL1    |  | CCDC43   |
|  |        |  |  | ZNF22    |  | ORC5      |  | CDC42EP3 |
|  |        |  |  | ZNF286A  |  | OSBP      |  | CDH15    |
|  |        |  |  | ZNF385B  |  | OTC       |  | CLSTN2   |
|  |        |  |  | ZNF407   |  | OTUD6B    |  | CMTR1    |
|  |        |  |  | ZNF623   |  | P2RX4     |  | COL5A2   |
|  |        |  |  |          |  | PABPC4    |  | CTNBL1   |
|  |        |  |  |          |  | PAPD7     |  | DDX6     |
|  |        |  |  |          |  | PATJ      |  | EPC1     |
|  |        |  |  |          |  | PCCA      |  | ETHE1    |
|  |        |  |  |          |  | PCSK4     |  | EXO1     |
|  |        |  |  |          |  | PCYOX1    |  | FASLG    |
|  |        |  |  |          |  | PDCD2     |  | FDFT1    |
|  |        |  |  |          |  | PDCD4     |  | FER      |
|  |        |  |  |          |  | PDGFRB    |  | GGCT     |

|  |  |  |  |  |  |         |  |            |
|--|--|--|--|--|--|---------|--|------------|
|  |  |  |  |  |  | PDIA6   |  | GOT1       |
|  |  |  |  |  |  | PDXK    |  | HEXIM1     |
|  |  |  |  |  |  | PES1    |  | HNRNPC     |
|  |  |  |  |  |  | PHF10   |  | IL27RA     |
|  |  |  |  |  |  | PHF12   |  | IVD        |
|  |  |  |  |  |  | PHF20L1 |  | KCNA2      |
|  |  |  |  |  |  | PI4KB   |  | MAP3K4     |
|  |  |  |  |  |  | PIGH    |  | MBD2       |
|  |  |  |  |  |  | PIGL    |  | MTMR2      |
|  |  |  |  |  |  | PIK3CD  |  | MYO9B      |
|  |  |  |  |  |  | PIK3R3  |  | NFKBIB     |
|  |  |  |  |  |  | PKDCC   |  | NIT1       |
|  |  |  |  |  |  | PKNOX1  |  | PDE7B      |
|  |  |  |  |  |  | PLA2G4B |  | PIAS1      |
|  |  |  |  |  |  | PLA2G4E |  | PIN1       |
|  |  |  |  |  |  | PLAU    |  | PLA2R1     |
|  |  |  |  |  |  | PLEKHM3 |  | PLXNA3     |
|  |  |  |  |  |  | PLET1   |  | PNOC       |
|  |  |  |  |  |  | PLGRKT  |  | POLA2      |
|  |  |  |  |  |  | PLPP3   |  | PPM1E      |
|  |  |  |  |  |  | PMEPA1  |  | PRKAG1     |
|  |  |  |  |  |  | PNPLA7  |  | PRKDC      |
|  |  |  |  |  |  | PNPO    |  | RFXANK     |
|  |  |  |  |  |  | POLE4   |  | RGN        |
|  |  |  |  |  |  | PPM1M   |  | RNF41      |
|  |  |  |  |  |  | PREPL   |  | RRH        |
|  |  |  |  |  |  | PRKCD   |  | SCP2       |
|  |  |  |  |  |  | PRMT5   |  | SCTR       |
|  |  |  |  |  |  | PRRC2C  |  | SLC11A2    |
|  |  |  |  |  |  | PSAT1   |  | SLC35B2    |
|  |  |  |  |  |  | PSMG2   |  | SLCO3A1    |
|  |  |  |  |  |  | PTCD2   |  | SMAD4      |
|  |  |  |  |  |  | PTPN1   |  | SMYD3      |
|  |  |  |  |  |  | PTPN6   |  | SUCLG1     |
|  |  |  |  |  |  | PTPRO   |  | SUN2       |
|  |  |  |  |  |  | PVALB   |  | TBC1D9B    |
|  |  |  |  |  |  | QPRT    |  | TCTE1      |
|  |  |  |  |  |  | RANBP9  |  | TEKT1      |
|  |  |  |  |  |  | RANGAP1 |  | TPI1       |
|  |  |  |  |  |  | RARRES2 |  | TPK1       |
|  |  |  |  |  |  | RASSF5  |  | UBE2G2     |
|  |  |  |  |  |  | RAVER2  |  | UBR2       |
|  |  |  |  |  |  | RB1     |  | VIP        |
|  |  |  |  |  |  | RBM10   |  | VNN1       |
|  |  |  |  |  |  | RBM47   |  | WDR1       |
|  |  |  |  |  |  | RBM48   |  | XPA        |
|  |  |  |  |  |  | RBM8A   |  | ZNF235     |
|  |  |  |  |  |  | RCHY1   |  | CSGALNACT1 |
|  |  |  |  |  |  | REEP3   |  | FRYL       |
|  |  |  |  |  |  | REXO2   |  | HS3ST3A1   |
|  |  |  |  |  |  | RIOK1   |  | LGR5       |
|  |  |  |  |  |  | RND2    |  | LPL        |
|  |  |  |  |  |  | RNF6    |  | ADAMTS17   |

|  |  |  |  |  |  |            |  |           |
|--|--|--|--|--|--|------------|--|-----------|
|  |  |  |  |  |  | RPIA       |  | AGAP1     |
|  |  |  |  |  |  | RPL18      |  | AGK       |
|  |  |  |  |  |  | RPL24      |  | ALAD      |
|  |  |  |  |  |  | RPL27A     |  | ALG12     |
|  |  |  |  |  |  | RPL28      |  | ALOXE3    |
|  |  |  |  |  |  | RPL6       |  | ARHGAP25  |
|  |  |  |  |  |  | RPL7L1     |  | ARRDC2    |
|  |  |  |  |  |  | RPLP0      |  | ATP1A4    |
|  |  |  |  |  |  | Rps12-ps24 |  | ATP2A2    |
|  |  |  |  |  |  | RRP8       |  | B4GALNT3  |
|  |  |  |  |  |  | RSF1       |  | BAAT      |
|  |  |  |  |  |  | RTCB       |  | BCOR      |
|  |  |  |  |  |  | RUVBL1     |  | BOD1      |
|  |  |  |  |  |  | RXFP3      |  | C18orf25  |
|  |  |  |  |  |  | SAMHD1     |  | C1orf43   |
|  |  |  |  |  |  | SAP130     |  | C1QTNF1   |
|  |  |  |  |  |  | SDCBP2     |  | C1R       |
|  |  |  |  |  |  | SELPLG     |  | C2orf70   |
|  |  |  |  |  |  | SENP1      |  | CACNA1G   |
|  |  |  |  |  |  | SERINC3    |  | CACTIN    |
|  |  |  |  |  |  | SERPINH1   |  | CAPNS2    |
|  |  |  |  |  |  | SERTAD3    |  | CATSPER2  |
|  |  |  |  |  |  | SETD5      |  | CBLN3     |
|  |  |  |  |  |  | SH3BP2     |  | CBX7      |
|  |  |  |  |  |  | SH3PXD2B   |  | CCDC103   |
|  |  |  |  |  |  | SHMT1      |  | CCDC113   |
|  |  |  |  |  |  | SIN3B      |  | CCDC153   |
|  |  |  |  |  |  | SKP2       |  | CCER2     |
|  |  |  |  |  |  | SLC11A2    |  | CD79B     |
|  |  |  |  |  |  | SLC12A2    |  | CDC25B    |
|  |  |  |  |  |  | SLC24A3    |  | CDC6      |
|  |  |  |  |  |  | SLC31A1    |  | CDKL2     |
|  |  |  |  |  |  | SLC35B1    |  | CERS6     |
|  |  |  |  |  |  | SLC35B2    |  | CHD7      |
|  |  |  |  |  |  | SLC38A9    |  | CHKA      |
|  |  |  |  |  |  | SLC39A11   |  | CHST9     |
|  |  |  |  |  |  | SLC40A1    |  | COL9A1    |
|  |  |  |  |  |  | SLC7A8     |  | CPNE7     |
|  |  |  |  |  |  | SLC8A1     |  | CROT      |
|  |  |  |  |  |  | SLC8B1     |  | CTDSPL2   |
|  |  |  |  |  |  | SMAGP      |  | CUX1      |
|  |  |  |  |  |  | SMC2       |  | CYTH1     |
|  |  |  |  |  |  | SNX18      |  | DACT1     |
|  |  |  |  |  |  | SQLE       |  | DKK2      |
|  |  |  |  |  |  | STC2       |  | EBI3      |
|  |  |  |  |  |  | STIP1      |  | EFEMP1    |
|  |  |  |  |  |  | STRA6      |  | EIF4ENIF1 |
|  |  |  |  |  |  | STRADB     |  | ELMO1     |
|  |  |  |  |  |  | STT3B      |  | EPC2      |
|  |  |  |  |  |  | SUN2       |  | EPSTI1    |
|  |  |  |  |  |  | SUPT6H     |  | ERC1      |
|  |  |  |  |  |  | SYF2       |  | EYA2      |
|  |  |  |  |  |  | SYNJ2      |  | FAM110B   |

|  |  |  |  |  |  |           |  |          |
|--|--|--|--|--|--|-----------|--|----------|
|  |  |  |  |  |  | TARS      |  | FAM120B  |
|  |  |  |  |  |  | TBCD      |  | FAM151A  |
|  |  |  |  |  |  | TBRG1     |  | FAM69C   |
|  |  |  |  |  |  | TCF20     |  | FAT1     |
|  |  |  |  |  |  | TEAD2     |  | FDX1     |
|  |  |  |  |  |  | TECPR2    |  | FRMD4B   |
|  |  |  |  |  |  | TERF2     |  | FSD2     |
|  |  |  |  |  |  | TFPT      |  | GABPB1   |
|  |  |  |  |  |  | TGFBII1   |  | GBP2     |
|  |  |  |  |  |  | TGS1      |  | GFRA4    |
|  |  |  |  |  |  | THBS2     |  | GLT8D1   |
|  |  |  |  |  |  | THSD4     |  | GNB1L    |
|  |  |  |  |  |  | THTPA     |  | GPC6     |
|  |  |  |  |  |  | TLR7      |  | GPR108   |
|  |  |  |  |  |  | TMC7      |  | GRHPR    |
|  |  |  |  |  |  | TMED4     |  | GRIK1    |
|  |  |  |  |  |  | TMEM176A  |  | GRIN2A   |
|  |  |  |  |  |  | TMEM181   |  | GSAP     |
|  |  |  |  |  |  | TMEM209   |  | GULP1    |
|  |  |  |  |  |  | TMEM260   |  | HCFC1R1  |
|  |  |  |  |  |  | TNFAIP8L2 |  | HIC2     |
|  |  |  |  |  |  | TNFRSF9   |  | HMG20B   |
|  |  |  |  |  |  | TNIK      |  | HPS3     |
|  |  |  |  |  |  | TNS1      |  | HSD11B1  |
|  |  |  |  |  |  | TOP1MT    |  | HSF2BP   |
|  |  |  |  |  |  | TOR1AIP2  |  | HSPB6    |
|  |  |  |  |  |  | TPK1      |  | HSPH1    |
|  |  |  |  |  |  | Tpm2      |  | IL12RB2  |
|  |  |  |  |  |  | TPRG1L    |  | IL1RL1   |
|  |  |  |  |  |  | TRAP1     |  | IL23A    |
|  |  |  |  |  |  | TSC22D2   |  | ILDR2    |
|  |  |  |  |  |  | TSEN2     |  | IRX2     |
|  |  |  |  |  |  | Ttc41     |  | KCNAB1   |
|  |  |  |  |  |  | TYROBP    |  | KCNJ12   |
|  |  |  |  |  |  | UAP1L1    |  | KCNT2    |
|  |  |  |  |  |  | UBOX5     |  | KCP      |
|  |  |  |  |  |  | UBQLN1    |  | KCTD14   |
|  |  |  |  |  |  | USP10     |  | KIAA1755 |
|  |  |  |  |  |  | USP48     |  | KIF1BP   |
|  |  |  |  |  |  | VAMP8     |  | KLHDC2   |
|  |  |  |  |  |  | VAR2      |  | KMT2C    |
|  |  |  |  |  |  | VAV1      |  | LAMP3    |
|  |  |  |  |  |  | VAV2      |  | LATS1    |
|  |  |  |  |  |  | VPS13A    |  | LBH      |
|  |  |  |  |  |  | VPS13B    |  | LLPH     |
|  |  |  |  |  |  | VPS33A    |  | LRRC57   |
|  |  |  |  |  |  | VPS33B    |  | LRRC61   |
|  |  |  |  |  |  | WDYHV1    |  | LYNX1    |
|  |  |  |  |  |  | YIF1A     |  | MAN2B2   |
|  |  |  |  |  |  | YIPF2     |  | MANEA    |
|  |  |  |  |  |  | YIPF4     |  | MAPK11   |
|  |  |  |  |  |  | YWHAH     |  | MBD5     |
|  |  |  |  |  |  | ZC3H12A   |  | MED24    |



|  |  |  |  |  |        |  |          |
|--|--|--|--|--|--------|--|----------|
|  |  |  |  |  | ZC3HC1 |  | METTLL23 |
|  |  |  |  |  | ZCCHC4 |  | MLC1     |
|  |  |  |  |  | ZCCHC6 |  | MPZL2    |
|  |  |  |  |  | ZEB2   |  | MRPL42   |
|  |  |  |  |  | ZFAND6 |  | MRPS21   |
|  |  |  |  |  | Zfp658 |  | MRPS7    |
|  |  |  |  |  | ZGPAT  |  | MTRR     |
|  |  |  |  |  | ZNF445 |  | MXD1     |
|  |  |  |  |  | ZNF777 |  | MYBPH    |
|  |  |  |  |  | ZRSR2  |  | MYH6     |
|  |  |  |  |  |        |  | MYO1C    |
|  |  |  |  |  |        |  | NDUFAF7  |
|  |  |  |  |  |        |  | NEK3     |
|  |  |  |  |  |        |  | NEPRO    |
|  |  |  |  |  |        |  | NFKB2    |
|  |  |  |  |  |        |  | NFX1     |
|  |  |  |  |  |        |  | NME6     |
|  |  |  |  |  |        |  | NPB      |
|  |  |  |  |  |        |  | NPL      |
|  |  |  |  |  |        |  | NR5A2    |
|  |  |  |  |  |        |  | NTM      |
|  |  |  |  |  |        |  | NTNG1    |
|  |  |  |  |  |        |  | NUB1     |
|  |  |  |  |  |        |  | NUP54    |
|  |  |  |  |  |        |  | NVL      |
|  |  |  |  |  |        |  | OGDH     |
|  |  |  |  |  |        |  | OLFM4    |
|  |  |  |  |  |        |  | OSER1    |
|  |  |  |  |  |        |  | PAICS    |
|  |  |  |  |  |        |  | PARP9    |
|  |  |  |  |  |        |  | PCDHA7   |
|  |  |  |  |  |        |  | PHIP     |
|  |  |  |  |  |        |  | PLAA     |
|  |  |  |  |  |        |  | PLAT     |
|  |  |  |  |  |        |  | PLEKHG1  |
|  |  |  |  |  |        |  | POMC     |
|  |  |  |  |  |        |  | POMT1    |
|  |  |  |  |  |        |  | PPA2     |
|  |  |  |  |  |        |  | PIIP5K1  |
|  |  |  |  |  |        |  | PRR22    |
|  |  |  |  |  |        |  | PRR30    |
|  |  |  |  |  |        |  | PTGDR    |
|  |  |  |  |  |        |  | PTGER3   |
|  |  |  |  |  |        |  | PTGFRN   |
|  |  |  |  |  |        |  | PTGIS    |
|  |  |  |  |  |        |  | PTPN22   |
|  |  |  |  |  |        |  | RAB27A   |
|  |  |  |  |  |        |  | RABGGTB  |
|  |  |  |  |  |        |  | RBM46    |
|  |  |  |  |  |        |  | RCHY1    |
|  |  |  |  |  |        |  | RET      |
|  |  |  |  |  |        |  | RIOK1    |
|  |  |  |  |  |        |  | RPS6KC1  |



















|                     |                 |                 |                 |                 |                 |                 |                       |
|---------------------|-----------------|-----------------|-----------------|-----------------|-----------------|-----------------|-----------------------|
|                     |                 |                 |                 |                 |                 |                 | VPS33B                |
|                     |                 |                 |                 |                 |                 |                 | WDYHV1                |
|                     |                 |                 |                 |                 |                 |                 | YIF1A                 |
|                     |                 |                 |                 |                 |                 |                 | YIPF4                 |
|                     |                 |                 |                 |                 |                 |                 | YWHAH                 |
|                     |                 |                 |                 |                 |                 |                 | ZC3H12A               |
|                     |                 |                 |                 |                 |                 |                 | ZC3HC1                |
|                     |                 |                 |                 |                 |                 |                 | ZCCHC4                |
|                     |                 |                 |                 |                 |                 |                 | ZCCHC6                |
|                     |                 |                 |                 |                 |                 |                 | ZEB2                  |
|                     |                 |                 |                 |                 |                 |                 | ZFAND6                |
|                     |                 |                 |                 |                 |                 |                 | Zfp658                |
|                     |                 |                 |                 |                 |                 |                 | ZNF445                |
|                     |                 |                 |                 |                 |                 |                 | ZNF777                |
|                     |                 |                 |                 |                 |                 |                 | ZRSR2                 |
|                     |                 |                 |                 |                 |                 |                 | NARFL                 |
|                     |                 |                 |                 |                 |                 |                 | TMEM185A              |
|                     |                 |                 |                 |                 |                 |                 | ZNF212                |
| <b>Overlap with</b> | <b>GSE44387</b> | <b>GSE63852</b> | <b>GSE58642</b> | <b>GSE50527</b> | <b>GSE58516</b> | <b>GSE86923</b> | <b>Combined lists</b> |
| DEGs in male        | AGPAT3          | AAAS            | CSGALNACT1      | ABCA3           | PEX26           | AAAS            | AGPAT3                |
|                     | ALDOA           | ALDH5A1         | FRYL            | AGAP3           |                 | ABCA7           | ALDOA                 |
|                     | ANKRD17         | ARL6IP1         | LPL             | BCOR            |                 | ACP2            | ANKRD17               |
|                     | Anp32a          | CAD             |                 | BOD1            |                 | ACTN4           | Anp32a                |
|                     | APMAP           | CALR            |                 | C1orf43         |                 | AIDA            | APMAP                 |
|                     | APOE            | CANX            |                 | C1QTNF1         |                 | Akap9           | APOE                  |
|                     | BCL9L           | CLSTN2          |                 | CACNA1G         |                 | ANKRD11         | BCL9L                 |
|                     | BIRC6           | CNEP1R1         |                 | CACTIN          |                 | AQR             | BIRC6                 |
|                     | CDHR4           | COL5A2          |                 | CAMKV           |                 | ARL6IP1         | CDHR4                 |
|                     | CDK5RAP2        | EPC1            |                 | CDC25B          |                 | ASH1L           | CDK5RAP2              |
|                     | CIC             | ERBB4           |                 | CLINT1          |                 | ATG2B           | CIC                   |
|                     | CMIP            | FER             |                 | COBLL1          |                 | AVL9            | CMIP                  |
|                     | COG2            | FGFR2           |                 | CROT            |                 | BMS1            | COG2                  |
|                     | CSDE1           | FTSJ1           |                 | CTDSPL2         |                 | BTAF1           | CSDE1                 |
|                     | CYP1B1          | GPD1            |                 | CUX1            |                 | CACNA1G         | CYP1B1                |
|                     | DENND2A         | HNRNPC          |                 | CYTH1           |                 | CACTIN          | DENND2A               |
|                     | DHX36           | INHBB           |                 | DACT1           |                 | CADPS2          | DHX36                 |
|                     | DNASE2          | MAP1B           |                 | DIRAS2          |                 | CASKIN1         | DNASE2                |
|                     | EIF4G1          | MLLT11          |                 | ECH1            |                 | CCND1           | EIF4G1                |
|                     | EPB41L2         | MTMR2           |                 | ELAVL2          |                 | CDC25B          | EPB41L2               |
|                     | EXOSC10         | NEURL1B         |                 | EPC2            |                 | CDH3            | EXOSC10               |
|                     | EZH1            | NF1             |                 | ERC1            |                 | CEP295          | EZH1                  |
|                     | FAM114A2        | POU3F3          |                 | ERICH2          |                 | CHD2            | FAM114A2              |
|                     | FASTK           | SCP2            |                 | FAM110B         |                 | CHD6            | FASTK                 |
|                     | FKBP15          | SLC11A2         |                 | FASTK           |                 | CHD9            | FKBP15                |
|                     | GCN1            | SUN2            |                 | FAT1            |                 | CKB             | GCN1                  |
|                     | GHR             | TIMM13          |                 | FRMD4B          |                 | CLDN12          | GHR                   |
|                     | GLUD1           | TTC3            |                 | FUT9            |                 | CLDN2           | GLUD1                 |
|                     | GON4L           | WDR1            |                 | GPC6            |                 | CNTN2           | GON4L                 |
|                     | GSN             | ZBTB8OS         |                 | HLA-A           |                 | CPE             | GSN                   |
|                     | HIP1            | ZNF235          |                 | HPS3            |                 | CPEB3           | HIP1                  |
|                     | HLA-A           |                 |                 | ILDR2           |                 | CPNE4           | HLA-A                 |
|                     | HSD17B4         |                 |                 | KCTD20          |                 | CYCS            | HSD17B4               |
|                     | IFT81           |                 |                 | KIAA1755        |                 | DEK             | IFT81                 |

|  |          |  |  |         |  |          |  |          |
|--|----------|--|--|---------|--|----------|--|----------|
|  | KBTBD11  |  |  | KITLG   |  | DGKZ     |  | KBTBD11  |
|  | KCNB1    |  |  | KLHL29  |  | DHX15    |  | KCNB1    |
|  | KDM5C    |  |  | KMT2C   |  | DLEU7    |  | KDM5C    |
|  | KIAA0100 |  |  | KRBA1   |  | DOCK4    |  | KIAA0100 |
|  | KLC4     |  |  | L3MBTL3 |  | DPYSL2   |  | KLC4     |
|  | KMT5B    |  |  | LATS1   |  | Dst      |  | KMT5B    |
|  | L3MBTL3  |  |  | LBH     |  | Dync1i2  |  | L3MBTL3  |
|  | LAMB1    |  |  | LLPH    |  | EDRF1    |  | LAMB1    |
|  | MECP2    |  |  | MAP6    |  | EIF4G1   |  | MECP2    |
|  | MFN1     |  |  | MBOAT2  |  | EXOSC7   |  | MFN1     |
|  | MLX      |  |  | MED24   |  | FAM110B  |  | MLX      |
|  | MPDU1    |  |  | MFRP    |  | FAM114A2 |  | MPDU1    |
|  | MYNN     |  |  | MLC1    |  | FBLN1    |  | MYNN     |
|  | MYSM1    |  |  | MYH6    |  | FCGR2A   |  | MYSM1    |
|  | NAA25    |  |  | NACC1   |  | FRMD4B   |  | NAA25    |
|  | NCF1     |  |  | NASP    |  | FRY      |  | NCF1     |
|  | OGFOD2   |  |  | NF1     |  | FSCN1    |  | OGFOD2   |
|  | PBRM1    |  |  | NFX1    |  | G3BP1    |  | PBRM1    |
|  | PER2     |  |  | NPTXR   |  | GADD45A  |  | PER2     |
|  | PHF20L1  |  |  | NTN1    |  | GAPVD1   |  | PHF20L1  |
|  | PLXNC1   |  |  | NTNG1   |  | GATAD2B  |  | PLXNC1   |
|  | PPA1     |  |  | NUB1    |  | GLUD1    |  | PPA1     |
|  | PPM1H    |  |  | NXPH4   |  | Gprasp2  |  | PPM1H    |
|  | PPP4R3B  |  |  | OGDH    |  | GPSM1    |  | PPP4R3B  |
|  | RAF1     |  |  | OTP     |  | GSTP1    |  | RAF1     |
|  | RALGAPA2 |  |  | PHF13   |  | GTF2H4   |  | RALGAPA2 |
|  | RAPGEF1  |  |  | PIK3R2  |  | H2AFZ    |  | RAPGEF1  |
|  | RBM5     |  |  | PLAT    |  | HELZ     |  | RBM5     |
|  | REPS2    |  |  | REPS2   |  | HLA-A    |  | REPS2    |
|  | RNF10    |  |  | RIOK1   |  | HMCN1    |  | RNF10    |
|  | RNF114   |  |  | RNF182  |  | HNRNPC   |  | RNF114   |
|  | RNF19A   |  |  | SAMD12  |  | HSP90B1  |  | RNF19A   |
|  | RNF31    |  |  | SEMA5A  |  | HSPA8    |  | RNF31    |
|  | SAP130   |  |  | SESN1   |  | HSPB1    |  | SAP130   |
|  | SCAF4    |  |  | SHANK3  |  | HSPD1    |  | SCAF4    |
|  | SHANK3   |  |  | SLC12A5 |  | IARS     |  | SHANK3   |
|  | SLC25A4  |  |  | SLFN13  |  | ICE1     |  | SLC25A4  |
|  | SLC45A4  |  |  | SORBS1  |  | IFT81    |  | SLC45A4  |
|  | SLC9A6   |  |  | STOX2   |  | IGSF3    |  | SLC9A6   |
|  | SLFN13   |  |  | SYNC    |  | INTS5    |  | SLFN13   |
|  | SND1     |  |  | TANC2   |  | IP6K1    |  | SND1     |
|  | SORBS1   |  |  | TAPBP   |  | ITGB8    |  | SORBS1   |
|  | SPATA2   |  |  | TCF25   |  | ITM2B    |  | SPATA2   |
|  | TAOK1    |  |  | TECPR2  |  | KCTD1    |  | TAOK1    |
|  | TGS1     |  |  | TET3    |  | KDM5A    |  | TGS1     |
|  | TMEM206  |  |  | TMEM63B |  | KDM5B    |  | TMEM206  |
|  | TMEM263  |  |  | TMEM72  |  | KRBA1    |  | TMEM263  |
|  | TNRC6B   |  |  | TRIM37  |  | LARS     |  | TNRC6B   |
|  | TRIP12   |  |  | TRIM62  |  | LBH      |  | TRIP12   |
|  | TRNT1    |  |  | TRPV4   |  | LPIN2    |  | TRNT1    |
|  | Ttf1     |  |  | UNC13D  |  | LRP1     |  | Ttf1     |
|  | UBR4     |  |  | USP24   |  | MAP1B    |  | UBR4     |
|  | VEGFB    |  |  | USPL1   |  | MBTD1    |  | VEGFB    |

|  |        |  |  |         |  |          |  |            |
|--|--------|--|--|---------|--|----------|--|------------|
|  | VPS13C |  |  | WNK2    |  | MED1     |  | VPS13C     |
|  | YME1L1 |  |  | XYLT1   |  | MIER1    |  | YME1L1     |
|  | ZBTB20 |  |  | YIPF2   |  | MOSPD1   |  | ZBTB20     |
|  | ZMYM5  |  |  | ZBTB8OS |  | MRPL4    |  | ZMYM5      |
|  | ZNF12  |  |  | ZNF131  |  | MSI2     |  | ZNF12      |
|  | ZNF274 |  |  | ZNF274  |  | N4BP2L1  |  | ZNF274     |
|  | ZNF330 |  |  | ZNF407  |  | NCL      |  | ZNF330     |
|  | ZNF560 |  |  | ZNF623  |  | NFIB     |  | ZNF560     |
|  |        |  |  |         |  | NHLRC3   |  | CSGALNACT1 |
|  |        |  |  |         |  | NHSL1    |  | FRYL       |
|  |        |  |  |         |  | NIPBL    |  | LPL        |
|  |        |  |  |         |  | NNAT     |  | AAAS       |
|  |        |  |  |         |  | NRXN2    |  | ALDH5A1    |
|  |        |  |  |         |  | NUDT21   |  | ARL6IP1    |
|  |        |  |  |         |  | OTUD7B   |  | CAD        |
|  |        |  |  |         |  | PEAR1    |  | CALR       |
|  |        |  |  |         |  | PFN1     |  | CANX       |
|  |        |  |  |         |  | PHF13    |  | CLSTN2     |
|  |        |  |  |         |  | PHF20L1  |  | CNEP1R1    |
|  |        |  |  |         |  | PHGDH    |  | COL5A2     |
|  |        |  |  |         |  | PKP4     |  | EPC1       |
|  |        |  |  |         |  | PLD3     |  | ERBB4      |
|  |        |  |  |         |  | PLEKHM3  |  | FER        |
|  |        |  |  |         |  | PLIN2    |  | FGFR2      |
|  |        |  |  |         |  | PMEPA1   |  | FTSJ1      |
|  |        |  |  |         |  | PPP4R3B  |  | GPD1       |
|  |        |  |  |         |  | PRRC2C   |  | HNRNPC     |
|  |        |  |  |         |  | Prrt1    |  | INHBB      |
|  |        |  |  |         |  | PTPRO    |  | MAP1B      |
|  |        |  |  |         |  | RBM10    |  | MLLT11     |
|  |        |  |  |         |  | REXO2    |  | MTMR2      |
|  |        |  |  |         |  | RIOK1    |  | NEURL1B    |
|  |        |  |  |         |  | RNASET2  |  | NF1        |
|  |        |  |  |         |  | RNF139   |  | POU3F3     |
|  |        |  |  |         |  | RPL18    |  | SCP2       |
|  |        |  |  |         |  | RPL6     |  | SLC11A2    |
|  |        |  |  |         |  | RPL7L1   |  | SUN2       |
|  |        |  |  |         |  | RPLP0    |  | TIMM13     |
|  |        |  |  |         |  | RSF1     |  | TTC3       |
|  |        |  |  |         |  | RSRC1    |  | WDR1       |
|  |        |  |  |         |  | Rsrc2    |  | ZBTB8OS    |
|  |        |  |  |         |  | RTCB     |  | ZNF235     |
|  |        |  |  |         |  | SAP130   |  | ABCA3      |
|  |        |  |  |         |  | SEH1L    |  | AGAP3      |
|  |        |  |  |         |  | SELENOP  |  | BCOR       |
|  |        |  |  |         |  | SERINC1  |  | BOD1       |
|  |        |  |  |         |  | SERINC3  |  | C1orf43    |
|  |        |  |  |         |  | SETD5    |  | C1QTNF1    |
|  |        |  |  |         |  | SH3PXD2B |  | CACNA1G    |
|  |        |  |  |         |  | SIN3B    |  | CACTIN     |
|  |        |  |  |         |  | SLC11A2  |  | CAMKV      |
|  |        |  |  |         |  | SLC24A3  |  | CDC25B     |
|  |        |  |  |         |  | SMC3     |  | CLINT1     |











|                     |                 |                 |                 |                 |                 |                 |  |                       |
|---------------------|-----------------|-----------------|-----------------|-----------------|-----------------|-----------------|--|-----------------------|
|                     |                 |                 |                 |                 |                 |                 |  | TPR                   |
|                     |                 |                 |                 |                 |                 |                 |  | TPRG1L                |
|                     |                 |                 |                 |                 |                 |                 |  | TSC22D2               |
|                     |                 |                 |                 |                 |                 |                 |  | UHRF2                 |
|                     |                 |                 |                 |                 |                 |                 |  | VARS2                 |
|                     |                 |                 |                 |                 |                 |                 |  | VMP1                  |
|                     |                 |                 |                 |                 |                 |                 |  | VPS54                 |
|                     |                 |                 |                 |                 |                 |                 |  | WASHC4                |
|                     |                 |                 |                 |                 |                 |                 |  | WSB1                  |
|                     |                 |                 |                 |                 |                 |                 |  | YIF1B                 |
|                     |                 |                 |                 |                 |                 |                 |  | YIPF4                 |
|                     |                 |                 |                 |                 |                 |                 |  | YTHDF3                |
|                     |                 |                 |                 |                 |                 |                 |  | YWHAH                 |
|                     |                 |                 |                 |                 |                 |                 |  | ZCCHC6                |
|                     |                 |                 |                 |                 |                 |                 |  | ZFAND6                |
|                     |                 |                 |                 |                 |                 |                 |  | Zfp60                 |
|                     |                 |                 |                 |                 |                 |                 |  | Zfp658                |
|                     |                 |                 |                 |                 |                 |                 |  | ZMAT1                 |
|                     |                 |                 |                 |                 |                 |                 |  | ZNF436                |
|                     |                 |                 |                 |                 |                 |                 |  | ZNF445                |
|                     |                 |                 |                 |                 |                 |                 |  | ZNF777                |
| <b>Overlap with</b> | <b>GSE44387</b> | <b>GSE63852</b> | <b>GSE58642</b> | <b>GSE50527</b> | <b>GSE58516</b> | <b>GSE86923</b> |  | <b>Combined lists</b> |
| DEGs in female      | AACS            | ABHD14A         | FRYL            | ABCA3           | PEX26           | ACP2            |  | AACS                  |
|                     | ABCC5           | ACSS3           |                 | ABT1            | SIDT1           | ACTN4           |  | ABCC5                 |
|                     | ACLY            | ADCY5           |                 | ADD3            | SLC25A39        | AHI1            |  | ACLY                  |
|                     | ADTRP           | ADD3            |                 | AGAP3           |                 | ALCAM           |  | ADTRP                 |
|                     | AGL             | ADORA2B         |                 | AGL             |                 | ANKS6           |  | AGL                   |
|                     | ALDOA           | AIFM1           |                 | ALDH1A2         |                 | APOPT1          |  | ALDOA                 |
|                     | APOE            | ALCAM           |                 | ATL1            |                 | ARPC3           |  | APOE                  |
|                     | APOPT1          | ALDH18A1        |                 | C11orf95        |                 | ASCC3           |  | APOPT1                |
|                     | ARAP2           | ARHGAP5         |                 | C1orf43         |                 | ASNS            |  | ARAP2                 |
|                     | ARHGEF25        | ASCC3           |                 | CACNA1G         |                 | ATF4            |  | ARHGEF25              |
|                     | ARIH2           | ATF6B           |                 | CACNG2          |                 | ATIC            |  | ARIH2                 |
|                     | ARNT            | ATP2B3          |                 | CAMK1G          |                 | ATP13A1         |  | ARNT                  |
|                     | ARPC3           | ATRN            |                 | CASK            |                 | ATP2B2          |  | ARPC3                 |
|                     | ASTN1           | CAD             |                 | CBX7            |                 | B4GALT3         |  | ASTN1                 |
|                     | ATG101          | CALR            |                 | CCDC153         |                 | BACE1           |  | ATG101                |
|                     | BCL6            | CANX            |                 | CDK5R1          |                 | BAP1            |  | BCL6                  |
|                     | BCL9L           | CAPSL           |                 | CDKL2           |                 | BCCIP           |  | BCL9L                 |
|                     | BIRC6           | CLTA            |                 | CDV3            |                 | BCL6            |  | BIRC6                 |
|                     | CA5B            | COL5A2          |                 | CERS2           |                 | BNC2            |  | CA5B                  |
|                     | CASKIN2         | EIF2A           |                 | CFH             |                 | BRSK1           |  | CASKIN2               |
|                     | CCNJ            | EIF5            |                 | CHCHD10         |                 | C2CD3           |  | CCNJ                  |
|                     | CD93            | ELAVL3          |                 | CHKA            |                 | CACNA1G         |  | CD93                  |
|                     | CFP             | EPC1            |                 | CHORDC1         |                 | CACNB2          |  | CFP                   |
|                     | CHPF            | ERBB4           |                 | CNTN4           |                 | CADPS2          |  | CHPF                  |
|                     | CHPT1           | FDFT1           |                 | COL5A1          |                 | CALCOCO1        |  | CHPT1                 |
|                     | CIC             | FER             |                 | CPNE7           |                 | Cald1           |  | CIC                   |
|                     | CLEC16A         | FGFR2           |                 | CROT            |                 | CASK            |  | CLEC16A               |
|                     | COPE            | HIPK2           |                 | CSE1L           |                 | CASKIN1         |  | COPE                  |
|                     | CRIM1           | HNRNPC          |                 | CTDSPL2         |                 | CCDC3           |  | CRIM1                 |
|                     | CSDE1           | KCNA2           |                 | CUX1            |                 | CCND1           |  | CSDE1                 |
|                     | CYHR1           | KCNQ4           |                 | DACT1           |                 | CD47            |  | CYHR1                 |

|  |          |         |  |           |  |          |  |          |
|--|----------|---------|--|-----------|--|----------|--|----------|
|  | CYP1B1   | LUM     |  | DCUN1D5   |  | CDH3     |  | CYP1B1   |
|  | DCAF5    | MAP1B   |  | DDN       |  | CDK2     |  | DCAF5    |
|  | DDX46    | MLLT11  |  | DISP1     |  | CELF2    |  | DDX46    |
|  | DECR1    | MRPL3   |  | DKK2      |  | CFB      |  | DECR1    |
|  | DISP1    | MVK     |  | EFEMP1    |  | CFP      |  | DISP1    |
|  | EEF2K    | MYO9B   |  | EHD2      |  | CHD2     |  | EEF2K    |
|  | EHD2     | OASL    |  | EIF4E     |  | CHD6     |  | EHD2     |
|  | EIF4EBP2 | OTX1    |  | EIF4ENIF1 |  | CHD9     |  | EIF4EBP2 |
|  | EIF4G1   | PAN2    |  | EYA2      |  | CHI3L1   |  | EIF4G1   |
|  | EPB41L2  | PEPD    |  | FAM110B   |  | CHKA     |  | EPB41L2  |
|  | ETNK1    | PHYH    |  | FAM69B    |  | CLUH     |  | ETNK1    |
|  | EXOSC10  | PLEC    |  | FAT1      |  | CMA1     |  | EXOSC10  |
|  | EZH1     | PLXNA3  |  | FERMT2    |  | CNST     |  | EZH1     |
|  | FAM114A2 | POLA2   |  | GABRA2    |  | CNTN4    |  | FAM114A2 |
|  | FERMT2   | POU3F3  |  | GLT8D1    |  | COL6A2   |  | FERMT2   |
|  | FKBP11   | PPM1E   |  | GNG10     |  | COPE     |  | FKBP11   |
|  | FKBP15   | PRKAG1  |  | GPR108    |  | CP       |  | FKBP15   |
|  | FLAD1    | PRKDC   |  | GPR173    |  | CPA3     |  | FLAD1    |
|  | FLII     | RNF41   |  | GRIN2A    |  | CPE      |  | FLII     |
|  | FN3KRP   | RPL13   |  | HNRNPA0   |  | CPEB3    |  | FN3KRP   |
|  | GATB     | SLC12A4 |  | HSPH1     |  | CPNE4    |  | GATB     |
|  | GHITM    | SLCO3A1 |  | IGFBP2    |  | CREB3L2  |  | GHITM    |
|  | GLUD1    | SLIT1   |  | ILDR2     |  | CRELD2   |  | GLUD1    |
|  | GPRC5B   | SMTN    |  | ITGA11    |  | CSE1L    |  | GPRC5B   |
|  | GRB10    | SPP1    |  | ITGB1     |  | CTSV     |  | GRB10    |
|  | GSN      | STX6    |  | KAT14     |  | CUL3     |  | GSN      |
|  | HIP1     | SYN1    |  | KCNQ4     |  | Cux1     |  | HIP1     |
|  | HSD17B4  | TBC1D9B |  | KCNT2     |  | CYCS     |  | HSD17B4  |
|  | IDUA     | TCTE1   |  | KCTD14    |  | CYHR1    |  | IDUA     |
|  | ITGA5    | TPK1    |  | KDM4B     |  | DLGAP2   |  | ITGA5    |
|  | ITGB3    | TTC3    |  | KIAA1755  |  | DDX24    |  | ITGB3    |
|  | JMJD8    | U2SURP  |  | KITLG     |  | DGKG     |  | JMJD8    |
|  | KAT14    | UBR2    |  | KMT2C     |  | DGKZ     |  | KAT14    |
|  | KDM4B    | USP9X   |  | KRBA1     |  | DHX37    |  | KDM4B    |
|  | KDM5C    | WDR1    |  | KRCC1     |  | DNAJC13  |  | KDM5C    |
|  | KHDRBS2  | ZNF235  |  | L3MBTL3   |  | DOCK4    |  | KHDRBS2  |
|  | KIAA0100 |         |  | LCAT      |  | DOT1L    |  | KIAA0100 |
|  | KIF13B   |         |  | LGALS8    |  | DPYSL2   |  | KIF13B   |
|  | KIF1B    |         |  | LHFPL4    |  | DRAM2    |  | KIF1B    |
|  | KLHL25   |         |  | LINC00998 |  | Dst      |  | KLHL25   |
|  | KMT5B    |         |  | LRRC57    |  | Dync1i2  |  | KMT5B    |
|  | L3MBTL3  |         |  | LYNX1     |  | EGFR     |  | L3MBTL3  |
|  | LAMB1    |         |  | MAGI1     |  | EIF3B    |  | LAMB1    |
|  | LAMC1    |         |  | MAN2B2    |  | EIF4A1   |  | LAMC1    |
|  | LDLR     |         |  | MAPK11    |  | EIF4G1   |  | LDLR     |
|  | LMNB2    |         |  | MDK       |  | EIF5     |  | LMNB2    |
|  | MAP3K10  |         |  | MED24     |  | EIF5A    |  | MAP3K10  |
|  | MARS     |         |  | MFAP3L    |  | ELAC2    |  | MARS     |
|  | MFN1     |         |  | MFS12     |  | EMILIN1  |  | MFN1     |
|  | MFS12    |         |  | MLC1      |  | ENG      |  | MFS12    |
|  | MYSM1    |         |  | MPZL2     |  | EPRS     |  | MYSM1    |
|  | NAA30    |         |  | MYBPH     |  | FAM110B  |  | NAA30    |
|  | NAGK     |         |  | MYO1C     |  | FAM114A2 |  | NAGK     |

|  |          |  |  |          |  |          |  |          |
|--|----------|--|--|----------|--|----------|--|----------|
|  | NDRG2    |  |  | NCOA1    |  | FAM171A2 |  | NDRG2    |
|  | NDUFA4   |  |  | NDUFAF7  |  | FAM8A1   |  | NDUFA4   |
|  | NDUFB9   |  |  | NME1     |  | FAR1     |  | NDUFB9   |
|  | NKTR     |  |  | NTM      |  | FBLN1    |  | NKTR     |
|  | OSTC     |  |  | NTN1     |  | Fcna     |  | OSTC     |
|  | PALD1    |  |  | NTNG1    |  | FKBP11   |  | PALD1    |
|  | PBRM1    |  |  | OGDH     |  | Fnbp11   |  | PBRM1    |
|  | PECR     |  |  | PAICS    |  | FSCN1    |  | PECR     |
|  | PER1     |  |  | PALD1    |  | GARS     |  | PER1     |
|  | PER2     |  |  | PAN2     |  | GBF1     |  | PER2     |
|  | PHF20L1  |  |  | PAQR3    |  | GLRB     |  | PHF20L1  |
|  | PLCB4    |  |  | PCDHA7   |  | GLUD1    |  | PLCB4    |
|  | PLPP3    |  |  | PHIP     |  | GOLGB1   |  | PLPP3    |
|  | PQLC1    |  |  | PI4KA    |  | Gprasp2  |  | PQLC1    |
|  | PSMA7    |  |  | PIK3R2   |  | GPSM1    |  | PSMA7    |
|  | PSMB4    |  |  | PLAA     |  | H2AFZ    |  | PSMB4    |
|  | PSMD13   |  |  | PLEC     |  | HES6     |  | PSMD13   |
|  | QKI      |  |  | PLPP3    |  | HIGD2A   |  | QKI      |
|  | RAB3GAP2 |  |  | POMT1    |  | HM13     |  | RAB3GAP2 |
|  | RALGAPA2 |  |  | PIP5K1   |  | HNRNPC   |  | RALGAPA2 |
|  | RAPGEF1  |  |  | PSMA7    |  | HNRNPL   |  | RAPGEF1  |
|  | RBM5     |  |  | PTGFRN   |  | HS6ST2   |  | RBM5     |
|  | RCOR1    |  |  | REPS2    |  | HSP90AA1 |  | RCOR1    |
|  | RDH10    |  |  | RET      |  | HSP90B1  |  | RDH10    |
|  | REPS2    |  |  | RNF138   |  | HSPA8    |  | REPS2    |
|  | RNASEL   |  |  | S1PR1    |  | HSPH1    |  | RNASEL   |
|  | SAFB2    |  |  | SAMD12   |  | IAH1     |  | SAFB2    |
|  | SCAF4    |  |  | SBK1     |  | ICE1     |  | SCAF4    |
|  | SCRN3    |  |  | SEMA5A   |  | IGFBP2   |  | SCRN3    |
|  | SCYL1    |  |  | SERINC5  |  | IGFBP4   |  | SCYL1    |
|  | SDC3     |  |  | SERPINB6 |  | IMP3     |  | SDC3     |
|  | SHANK3   |  |  | SHANK3   |  | IMP4     |  | SHANK3   |
|  | SLC37A3  |  |  | SLC37A3  |  | IMPAD1   |  | SLC37A3  |
|  | SLC45A4  |  |  | SIDT1    |  | ING3     |  | SLC45A4  |
|  | SMTN     |  |  | SLAIN1   |  | IP6K1    |  | SMTN     |
|  | SND1     |  |  | SLC12A5  |  | IPO4     |  | SND1     |
|  | SNX27    |  |  | SLC24A4  |  | ITGB8    |  | SNX27    |
|  | SNX33    |  |  | SLC47A1  |  | ITGBL1   |  | SNX33    |
|  | SORBS1   |  |  | SLC4A1   |  | KCNA2    |  | SORBS1   |
|  | STK39    |  |  | SLC9A9   |  | KIAA0922 |  | STK39    |
|  | STXBP4   |  |  | SNRNP48  |  | KIAA1551 |  | STXBP4   |
|  | Sult1a1  |  |  | SNTB2    |  | KIF1B    |  | Sult1a1  |
|  | SYNGR1   |  |  | SORBS1   |  | KIF3B    |  | SYNGR1   |
|  | SZRD1    |  |  | SPARCL1  |  | KIF3C    |  | SZRD1    |
|  | TAOK1    |  |  | SSPN     |  | KLHL25   |  | TAOK1    |
|  | TENM4    |  |  | SSR1     |  | KLHL5    |  | TENM4    |
|  | TIMP2    |  |  | STAT6    |  | KRBA1    |  | TIMP2    |
|  | TMC7     |  |  | STN1     |  | LAMP2    |  | TMC7     |
|  | TMEM57   |  |  | STRADB   |  | LARS     |  | TMEM57   |
|  | TRNT1    |  |  | STX7     |  | LDLR     |  | TRNT1    |
|  | TTC14    |  |  | SYT4     |  | LGALS8   |  | TTC14    |
|  | Ttf1     |  |  | TACR1    |  | LGALSL   |  | Ttf1     |
|  | UBR3     |  |  | TANC2    |  | LMNB2    |  | UBR3     |

|  |        |  |  |         |  |           |  |          |
|--|--------|--|--|---------|--|-----------|--|----------|
|  | UBR4   |  |  | TAPBP   |  | LOX       |  | UBR4     |
|  | UBXN4  |  |  | TCN2    |  | LRP1      |  | UBXN4    |
|  | UTP6   |  |  | TECPR2  |  | LRP2      |  | UTP6     |
|  | VEGFB  |  |  | TERF2   |  | LUM       |  | VEGFB    |
|  | VPS13C |  |  | TET3    |  | MAN2B1    |  | VPS13C   |
|  | WDR53  |  |  | TERC    |  | MAN2B2    |  | WDR53    |
|  | WNK1   |  |  | TGFB2   |  | MAN2C1    |  | WNK1     |
|  | XPR1   |  |  | TMEM63B |  | MAP1B     |  | XPR1     |
|  | ZBTB16 |  |  | TRIM37  |  | MAP1S     |  | ZBTB16   |
|  | ZBTB20 |  |  | TRIM62  |  | MAP7      |  | ZBTB20   |
|  | ZMYM5  |  |  | USP24   |  | MAPRE1    |  | ZMYM5    |
|  | ZNF106 |  |  | VCL     |  | MBTD1     |  | ZNF106   |
|  | ZNF12  |  |  | WAC     |  | MDK       |  | ZNF12    |
|  | ZNF274 |  |  | ZCCHC18 |  | MED1      |  | ZNF274   |
|  | ZNRF2  |  |  | ZFR2    |  | MFAP3L    |  | ZNRF2    |
|  |        |  |  | ZGPAT   |  | MFSD11    |  | ABHD14A  |
|  |        |  |  | ZNF274  |  | MICU2     |  | ACSS3    |
|  |        |  |  | ZNF623  |  | MKI67     |  | ADCY5    |
|  |        |  |  | ZNF706  |  | MKNK1     |  | ADD3     |
|  |        |  |  |         |  | MLEC      |  | ADORA2B  |
|  |        |  |  |         |  | MMP11     |  | AIFM1    |
|  |        |  |  |         |  | MRC1      |  | ALCAM    |
|  |        |  |  |         |  | MRPL3     |  | ALDH18A1 |
|  |        |  |  |         |  | MRPL52    |  | ARHGAP5  |
|  |        |  |  |         |  | MSMO1     |  | ASCC3    |
|  |        |  |  |         |  | MYADM     |  | ATF6B    |
|  |        |  |  |         |  | MYH9      |  | ATP2B3   |
|  |        |  |  |         |  | MYO9B     |  | ATRN     |
|  |        |  |  |         |  | MYOF      |  | CAD      |
|  |        |  |  |         |  | NARF      |  | CALR     |
|  |        |  |  |         |  | NCDN      |  | CANX     |
|  |        |  |  |         |  | NCEH1     |  | CAPSL    |
|  |        |  |  |         |  | NCL       |  | CLTA     |
|  |        |  |  |         |  | NECTIN2   |  | COL5A2   |
|  |        |  |  |         |  | NEK1      |  | EIF2A    |
|  |        |  |  |         |  | NEUROD6   |  | EIF5     |
|  |        |  |  |         |  | NFIB      |  | ELAVL3   |
|  |        |  |  |         |  | NFIX      |  | EPC1     |
|  |        |  |  |         |  | NHLRC3    |  | ERBB4    |
|  |        |  |  |         |  | NHSL1     |  | FDFT1    |
|  |        |  |  |         |  | NIPBL     |  | FER      |
|  |        |  |  |         |  | NIPSNAP3A |  | FGFR2    |
|  |        |  |  |         |  | NOL6      |  | HIPK2    |
|  |        |  |  |         |  | NPHP4     |  | HNRNPC   |
|  |        |  |  |         |  | NPR1      |  | KCNA2    |
|  |        |  |  |         |  | NR1I3     |  | KCNQ4    |
|  |        |  |  |         |  | NSDHL     |  | LUM      |
|  |        |  |  |         |  | NUDT4     |  | MAP1B    |
|  |        |  |  |         |  | NUPR1     |  | MLLT11   |
|  |        |  |  |         |  | ODC1      |  | MRPL3    |
|  |        |  |  |         |  | OGFRL1    |  | MVK      |
|  |        |  |  |         |  | PAPD7     |  | MYO9B    |
|  |        |  |  |         |  | PCDH17    |  | OASL     |

|  |  |  |  |  |  |         |  |          |
|--|--|--|--|--|--|---------|--|----------|
|  |  |  |  |  |  | PCSK4   |  | OTX1     |
|  |  |  |  |  |  | PCYOX1  |  | PAN2     |
|  |  |  |  |  |  | PDAP1   |  | PEPD     |
|  |  |  |  |  |  | PDCD4   |  | PHYH     |
|  |  |  |  |  |  | PDIA6   |  | PLEC     |
|  |  |  |  |  |  | PEAR1   |  | PLXNA3   |
|  |  |  |  |  |  | PECAM1  |  | POLA2    |
|  |  |  |  |  |  | PHF10   |  | POU3F3   |
|  |  |  |  |  |  | PHF12   |  | PPM1E    |
|  |  |  |  |  |  | PHF20L1 |  | PRKAG1   |
|  |  |  |  |  |  | PHKB    |  | PRKDC    |
|  |  |  |  |  |  | PIGL    |  | RNF41    |
|  |  |  |  |  |  | PIK3CD  |  | RPL13    |
|  |  |  |  |  |  | PIM3    |  | SLC12A4  |
|  |  |  |  |  |  | PKDCC   |  | SLCO3A1  |
|  |  |  |  |  |  | PKP4    |  | SLIT1    |
|  |  |  |  |  |  | PLA2G4B |  | SPP1     |
|  |  |  |  |  |  | PLA2G4E |  | STX6     |
|  |  |  |  |  |  | PLD3    |  | SYN1     |
|  |  |  |  |  |  | PLEC    |  | TBC1D9B  |
|  |  |  |  |  |  | PLEKHA5 |  | TCTE1    |
|  |  |  |  |  |  | PLPP3   |  | TPK1     |
|  |  |  |  |  |  | PLXNA2  |  | TTC3     |
|  |  |  |  |  |  | PNISR   |  | U2SURP   |
|  |  |  |  |  |  | PRMT5   |  | UBR2     |
|  |  |  |  |  |  | PRRG1   |  | USP9X    |
|  |  |  |  |  |  | PSAP    |  | WDR1     |
|  |  |  |  |  |  | PTGES3  |  | ZNF235   |
|  |  |  |  |  |  | PTP4A1  |  | FRYL     |
|  |  |  |  |  |  | RAB23   |  | PEX26    |
|  |  |  |  |  |  | RB1     |  | SIDT1    |
|  |  |  |  |  |  | RBM10   |  | SLC25A39 |
|  |  |  |  |  |  | RCOR1   |  | ABCA3    |
|  |  |  |  |  |  | REXO2   |  | ABT1     |
|  |  |  |  |  |  | RFC4    |  | AGAP3    |
|  |  |  |  |  |  | RNMT    |  | ALDH1A2  |
|  |  |  |  |  |  | RPL18   |  | ATL1     |
|  |  |  |  |  |  | RPL24   |  | C11orf95 |
|  |  |  |  |  |  | RPL6    |  | C1orf43  |
|  |  |  |  |  |  | RPL7L1  |  | CACNA1G  |
|  |  |  |  |  |  | RPS16   |  | CACNG2   |
|  |  |  |  |  |  | RPS6KB1 |  | CAMK1G   |
|  |  |  |  |  |  | RSF1    |  | CASK     |
|  |  |  |  |  |  | RTCB    |  | CBX7     |
|  |  |  |  |  |  | RTN3    |  | CCDC153  |
|  |  |  |  |  |  | SARAF   |  | CDK5R1   |
|  |  |  |  |  |  | SBF1    |  | CDKL2    |
|  |  |  |  |  |  | SDF2L1  |  | CDV3     |
|  |  |  |  |  |  | SEH1L   |  | CERS2    |
|  |  |  |  |  |  | SELENOP |  | CFH      |
|  |  |  |  |  |  | SELENOW |  | CHCHD10  |
|  |  |  |  |  |  | SERINC1 |  | CHKA     |
|  |  |  |  |  |  | SERINC3 |  | CHORDC1  |

|  |  |  |  |  |          |  |           |
|--|--|--|--|--|----------|--|-----------|
|  |  |  |  |  | SERPINB6 |  | CNTN4     |
|  |  |  |  |  | SERPINH1 |  | COL5A1    |
|  |  |  |  |  | SETD5    |  | CPNE7     |
|  |  |  |  |  | SH3BP2   |  | CROT      |
|  |  |  |  |  | SH3PXD2B |  | CSE1L     |
|  |  |  |  |  | SLA      |  | CTDSPL2   |
|  |  |  |  |  | SLC12A2  |  | CUX1      |
|  |  |  |  |  | SLC1A5   |  | DACT1     |
|  |  |  |  |  | SLC24A3  |  | DCUN1D5   |
|  |  |  |  |  | SLC25A27 |  | DDN       |
|  |  |  |  |  | SLC35B3  |  | DKK2      |
|  |  |  |  |  | SLC6A13  |  | EFEMP1    |
|  |  |  |  |  | SLC8A1   |  | EIF4E     |
|  |  |  |  |  | SMARCA4  |  | EIF4ENIF1 |
|  |  |  |  |  | SMC1A    |  | EYA2      |
|  |  |  |  |  | SMC2     |  | FAM110B   |
|  |  |  |  |  | SMC3     |  | FAM69B    |
|  |  |  |  |  | SMCHD1   |  | FAT1      |
|  |  |  |  |  | SNAP25   |  | GABRA2    |
|  |  |  |  |  | SNRNP48  |  | GLT8D1    |
|  |  |  |  |  | SNRPB    |  | GNG10     |
|  |  |  |  |  | SOX12    |  | GPR108    |
|  |  |  |  |  | SPP1     |  | GPR173    |
|  |  |  |  |  | SQLE     |  | GRIN2A    |
|  |  |  |  |  | SREBF2   |  | HNRNPA0   |
|  |  |  |  |  | SRSF2    |  | HSPH1     |
|  |  |  |  |  | SSPN     |  | IGFBP2    |
|  |  |  |  |  | STRADB   |  | ILDR2     |
|  |  |  |  |  | STT3B    |  | ITGA11    |
|  |  |  |  |  | STX7     |  | ITGB1     |
|  |  |  |  |  | SUPT6H   |  | KCNT2     |
|  |  |  |  |  | SYNJ2    |  | KCTD14    |
|  |  |  |  |  | SZRD1    |  | KIAA1755  |
|  |  |  |  |  | TAOK1    |  | KITLG     |
|  |  |  |  |  | TAPBP    |  | KMT2C     |
|  |  |  |  |  | TBC1D10B |  | KRBA1     |
|  |  |  |  |  | TCN2     |  | KRCC1     |
|  |  |  |  |  | TEAD2    |  | LCAT      |
|  |  |  |  |  | TECPR2   |  | LGALS8    |
|  |  |  |  |  | TERF2    |  | LHFPL4    |
|  |  |  |  |  | TES      |  | LINC00998 |
|  |  |  |  |  | TGFB1I1  |  | LRRC57    |
|  |  |  |  |  | TGFB2    |  | LYNX1     |
|  |  |  |  |  | THTPA    |  | MAGI1     |
|  |  |  |  |  | TIMP2    |  | MAN2B2    |
|  |  |  |  |  | TMC7     |  | MAPK11    |
|  |  |  |  |  | TMEM127  |  | MDK       |
|  |  |  |  |  | Tmem223  |  | MED24     |
|  |  |  |  |  | TNIK     |  | MFAP3L    |
|  |  |  |  |  | TNS1     |  | MLC1      |
|  |  |  |  |  | TOP1MT   |  | MPZL2     |
|  |  |  |  |  | TPK1     |  | MYBPH     |
|  |  |  |  |  | Tpm2     |  | MYO1C     |

















**Supplementary Table S9. The list of primers for qRT-PCR analyses.**

| <b>Gene</b>    | <b>Forward primer (5'-&gt; 3')</b> | <b>Reverse primer (5'-&gt; 3')</b> |
|----------------|------------------------------------|------------------------------------|
| <i>Auts2</i>   | GTCCTCCAGGCCCTAGTCTC               | CACACTGGGGCTATCCTTGT               |
| <i>Foxp2</i>   | CCACAAGTTTGGGCTATGGA               | ACTGCTGTTCCCATTGCTGT               |
| <i>Smarcc2</i> | GGCTGAAGGAAGTTGCAGAG               | ATCTGGGTCTCCACCAACAG               |
| <i>Dicer1</i>  | ACGAGATGCAAGGAATGGAC               | GTACACCTGCCAGACCACCT               |
| <i>Rn18s</i>   | CTGGATACCGCAGCTAGGAA               | GAATTTACCTCTAGCGGCG                |
